# Supplementary material
Source: PubMed Central journal article supplement (PMC4193796)
Supplement: NIHMS626763-supplement-Supporting_Information.pdf [file NIHMS626763-supplement-Supporting_Information.pdf]

# Supporting Information

| <b>Contents</b>                                                                 | <b>Page</b> |
|---------------------------------------------------------------------------------|-------------|
| 1. General experimental details                                                 | S1-S2       |
| 2. Catalyst screening                                                           | S3-S5       |
| 3. Factors affecting reaction's ee                                              | S6-S9       |
| 4. Final optimized reaction conditions, E factor,<br>and recycling studies      | S10-S11     |
| 5. Synthesis and chracterization of gold complexes                              | S12-S14     |
| 6. Synthesis and characterization of catalyst <b>(<i>R,R</i>)-15</b>            | S15-S16     |
| 7. General procedure for catalytic reactions                                    | S16-S17     |
| 8. X-ray crystallographic data and procedures                                   | S18-S21     |
| 9. Synthesis and characterization of intermediates, substrates,<br>and products | S-22-S59    |
| 10. References                                                                  | S59-S61     |
| 11. HPLC chromatograms                                                          | S62-S79     |
| 12. NMR Spectra                                                                 | S80-S229    |
| Section II. Computational Details                                               | S230-S357   |
| 1. Computational Results                                                        | S230-S240   |
| 2. References                                                                   | S240-S241   |
| 3. Drawings of some structures                                                  | S242-S245   |
| 4. Calculated geometries, thermochemical data,<br>and vibrational frequencies   | S246-S362   |

## PART 1: General experimental details

All manipulations were carried out under air unless otherwise noted. TLC plates (UV254 indicator, aluminum backed, thickness 200  $\mu\text{m}$ ) and silica gel (standard grade, 230 – 400 mesh) were purchased from EMD Chemicals. Diethyl ether (Fisher) and toluene (Aldrich) were purified over solvent purifier system (SPS). Hexane (Fischer) was purified by distillation from sodium benzophenone ketyl. Dichloromethane (Fischer) was washed with a sequence of concentrated  $\text{H}_2\text{SO}_4$ , deionized water, 5%  $\text{Na}_2\text{CO}_3$  and deionized water, followed by pre-drying over anhydrous  $\text{CaCl}_2$ , and were then refluxed over and distilled from  $\text{P}_2\text{O}_5$  under argon. Isopropanol (EMD) and methanol (Burdick & Jackson) was dried over and distilled from activated 4 Å molecular sieves prior to use.  $\text{Et}_3\text{N}$  (Fisher) and benzylamine (Acros) were dried over activated 4 Å molecular sieves and then distilled, degassed, and stored on dried 4 Å sieves under nitrogen. NMR solvents were purchased from Cambridge Isotopes Laboratories.  $\text{CDCl}_3$  was dried over activated 4 Å molecular sieves and then stored over dried 4 Å sieves. *bis*-(*S/R*)-1-Phenylethylamine (Alfa Aesar, 99%, *ee* 98+%) and (*R*)- and (*S*)-[1,1'-binaphthalene]-2,2'-diols (Chem-Impex International, Inc., >99.9%) were used as received after checking optical purity by HPLC.  $\text{Au}(\text{DMS})\text{Cl}$  (DMS = dimethylsulfide) was prepared by a literature procedure using chloroauric acid (99.9%, 49% Au) purchased from Strem. Reaction vials (4 mL with green top polypropylene cap and PTFE septa) were purchased from Chemglass Life Sciences, and used as received without further drying. Reaction vials were also recycled and re-used. HPLC grade water was used to prepare surfactant solutions. TPGS-750M was synthesized by a procedure published by our group,<sup>[1]</sup> and is also commercially available from Sigma-Aldrich. Ligands were either synthesized or generously received from F. Hoffmann-La Roche AG. All other reagents were purchased from Aldrich and Fischer and used as received. Optical rotation data were collected on an Autopol V polarimeter (Rudolph Research Analytical) using the sodium D line (589 nm). Concentrations (*c*) are quoted in grams of analyte per 100 mL. Melting points were determined using a MEL-TEMP II melting point apparatus with samples in

Kimble Kimex 51 capillaries (1.5-1.8 x 90 mm). NMR spectra were recorded at 23 °C on Varian Unity INOVA (400, 500 and 600 MHz) spectrometers. Reported chemical shifts are referenced to residual solvent peaks. IR spectra were acquired on a FTIR Perkin Elmer Spectrum Two: UATR Two spectrometer using 1 cm<sup>-1</sup> resolution. High resolution mass analyses were obtained using a 5975C Mass Selective Detector, coupled with a 7890A Gas Chromatograph (Agilent Technologies). As capillary column a HP-5MS cross-linked 5% phenylmethylpolysiloxane-diphenyl column (30 m x 0.250 mm, 0.25 micron, Agilent Technologies) was employed. Helium was used as carrier gas at a constant flow of 1 mL/min. Elemental analysis was performed at UCSB. Chiral HPLC data were collected using a Shimadzu SPD-m20a Prominence diode array detector.

## PART 2: Catalyst screening

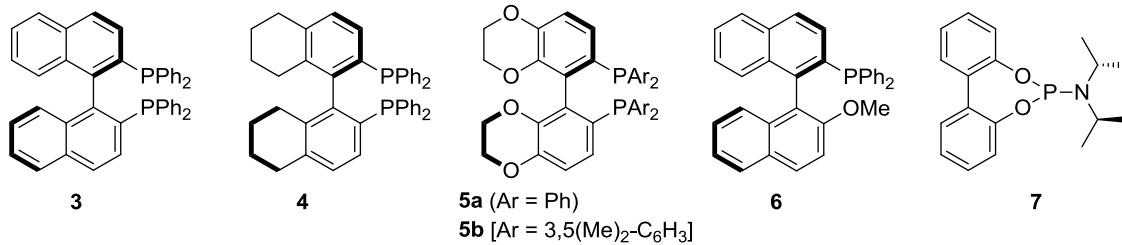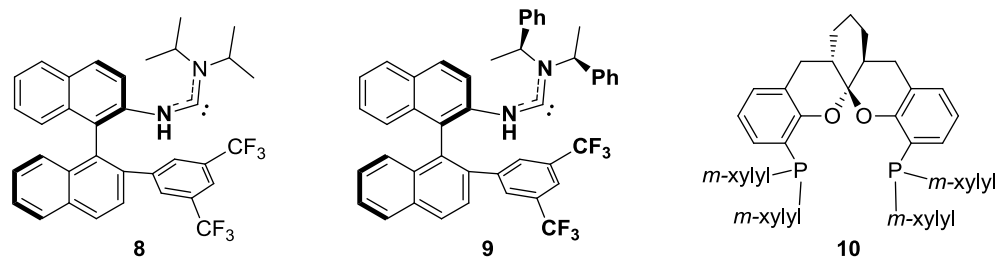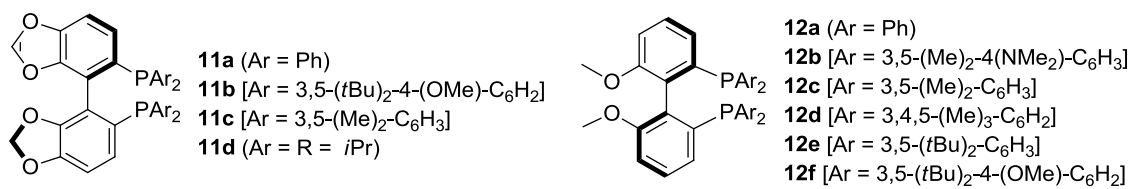

**nonracemic counterions**

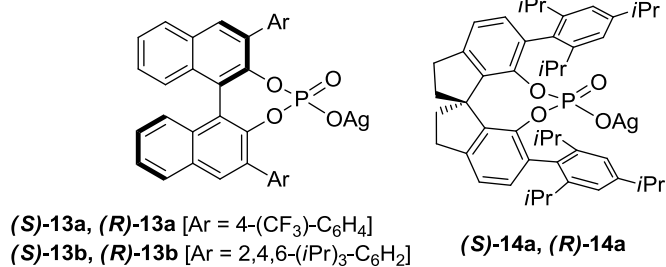

**most effective catalyst**

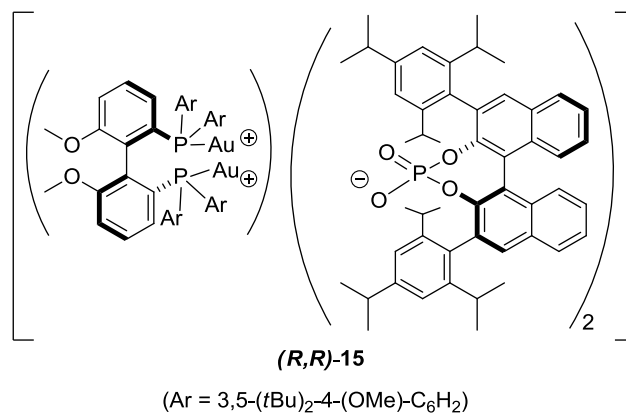

## Part 2a: Finding an appropriate ligand

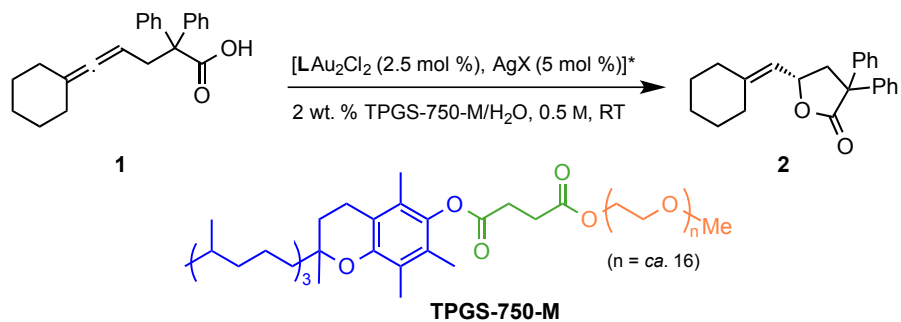

| Entry     | Ligand (L) | X <sup>-</sup>   | Time (h)  | % yield <b>2</b> | % ee      |
|-----------|------------|------------------|-----------|------------------|-----------|
| 1         | <b>3</b>   | BF <sub>4</sub>  | 78        | 98               | 3         |
| 2         | <b>3</b>   | SbF <sub>6</sub> | 70        | 95               | 1         |
| 3         | <b>3</b>   | OTf              | 68        | 97               | 2         |
| 4         | <b>4</b>   | SbF <sub>6</sub> | 74        | 95               | 11        |
| 5         | <b>5a</b>  | SbF <sub>6</sub> | 72        | 95               | 18        |
| 6         | <b>5b</b>  | SbF <sub>6</sub> | 78        | 96               | 30        |
| 7         | <b>7</b>   | SbF <sub>6</sub> | 29        | 93               | 1         |
| 8         | <b>8</b>   | SbF <sub>6</sub> | 32        | 92               | 7         |
| 9         | <b>8</b>   | PMB              | 56        | 91               | 18        |
| 10        | <b>9</b>   | PMB              | 67        | 67               | 40        |
| 11        | <b>9</b>   | PNB              | 70        | 70               | 50        |
| 12        | <b>10</b>  | SbF <sub>6</sub> | 60        | 85               | 29        |
| 13        | <b>11a</b> | SbF <sub>6</sub> | 70        | 90               | 6         |
| 14        | <b>11b</b> | SbF <sub>6</sub> | 75        | 91               | 36        |
| 15        | <b>11c</b> | SbF <sub>6</sub> | 42        | 94               | 7         |
| 16        | <b>11d</b> | SbF <sub>6</sub> | 78        | 90               | 40        |
| 17        | <b>11d</b> | BF <sub>4</sub>  | 78        | 94               | 38        |
| 18        | <b>11d</b> | OTf              | 70        | 90               | 22        |
| 19        | <b>11d</b> | PNB              | 72        | 95               | 51        |
| 20        | <b>12a</b> | SbF <sub>6</sub> | 48        | 95               | 12        |
| 21        | <b>12b</b> | SbF <sub>6</sub> | 49        | 91               | 18        |
| 22        | <b>12c</b> | SbF <sub>6</sub> | 40        | 85               | 31        |
| 23        | <b>12d</b> | PNB              | 30        | 97               | 37        |
| 24        | <b>12d</b> | SbF <sub>6</sub> | 33        | 97               | 12        |
| 25        | <b>12e</b> | PNB              | 38        | 70               | 30        |
| 26        | <b>12f</b> | SbF <sub>6</sub> | 39        | 98               | 43        |
| <b>27</b> | <b>12f</b> | <b>PNB</b>       | <b>48</b> | <b>97</b>        | <b>55</b> |

\*LAu<sub>2</sub>Cl<sub>2</sub> = LAuCl (5 mol %) when L = **7**, **8**, and **9**. PNB = *p*-nitrobenzoate, PMB = *p*-methoxybenzoate.

**Part 2b:** Chiral counterion approach with ligand **12f** – match-mismatch studies

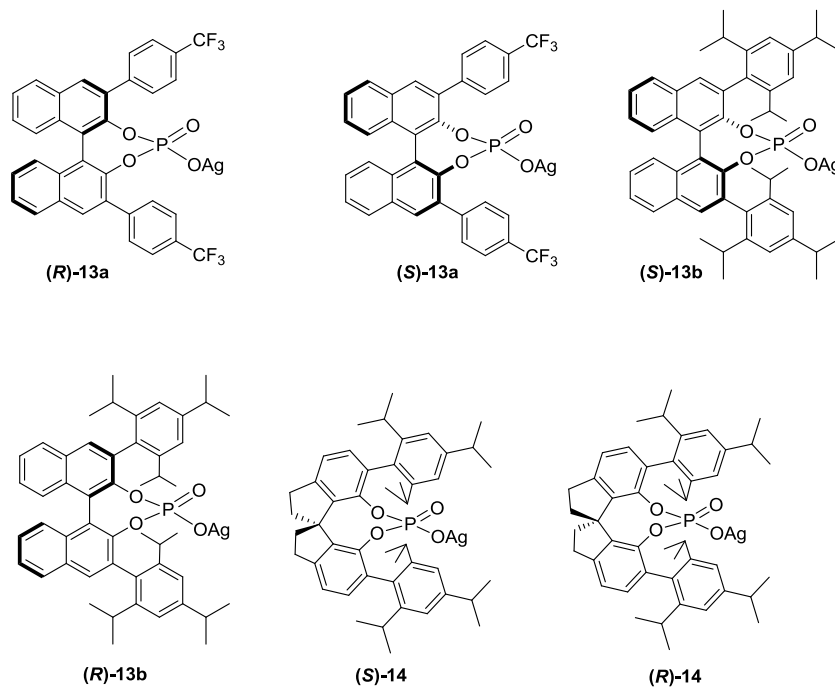

| Entry | <b>12f</b> -Au <sub>2</sub> Cl <sub>2</sub><br>(2.5 mol%) | Counter-ion<br>(5.0 mol%) | Time (h) | % yield | % ee |
|-------|-----------------------------------------------------------|---------------------------|----------|---------|------|
| 1     | ( <i>R</i> )                                              | ( <i>R</i> )-13a          | 70       | 97      | 27   |
| 2     | ( <i>R</i> )                                              | ( <i>S</i> )-13a          | 72       | 97      | 51   |
| 3     | ( <i>R</i> )                                              | ( <i>R</i> )-13b          | 72       | 95      | 75   |
| 4     | ( <i>R</i> )                                              | ( <i>S</i> )-13b          | 72       | 96      | 70   |
| 5     | ( <i>R</i> )                                              | ( <i>R</i> )-14           | 78       | 96      | 55   |
| 6     | ( <i>R</i> )                                              | ( <i>S</i> )-14           | 78       | 96      | 46   |
| 7     | ( <i>S</i> )-                                             | ( <i>R</i> )-13a          | 66       | 97      | -40  |
| 8     | ( <i>S</i> )-                                             | ( <i>S</i> )-13a          | 70       | 97      | -27  |
| 9     | ( <i>S</i> )-                                             | ( <i>R</i> )-13b          | 72       | 95      | -66  |
| 10    | ( <i>S</i> )-                                             | ( <i>S</i> )-13b          | 72       | 95      | -75  |
| 11    | ( <i>S</i> )-                                             | ( <i>R</i> )-14           | 75       | 96      | -40  |
| 12    | ( <i>S</i> )-                                             | ( <i>S</i> )-14           | 78       | 96      | -55  |

### Part 3: Improved *ee* without silver chloride

A 1:2 ratio of **12f**-Au<sub>2</sub>Cl<sub>2</sub> and counterion were dissolved in dry CH<sub>2</sub>Cl<sub>2</sub> under argon. The mixture was stirred at RT for 40 min. Silver chloride precipitated and was filtered through Celite and then a 0.25 μm PTFE microfilter. The volatiles were removed under reduced pressure to obtain active catalyst as a solid that was immediately used for the following catalytic reactions.

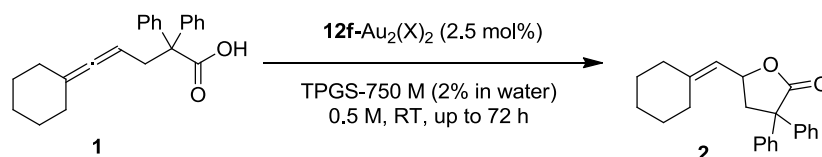

| Entry | <b>12f</b>   | <b>X</b>     | % yield | % ee |
|-------|--------------|--------------|---------|------|
| 1     | ( <i>R</i> ) | ( <i>R</i> ) | 92      | 86   |
| 2     | ( <i>S</i> ) | ( <i>S</i> ) | 90      | -85  |
| 3     | ( <i>R</i> ) | ( <i>S</i> ) | 90      | 78   |
| 4     | ( <i>S</i> ) | ( <i>R</i> ) | 91      | -78  |

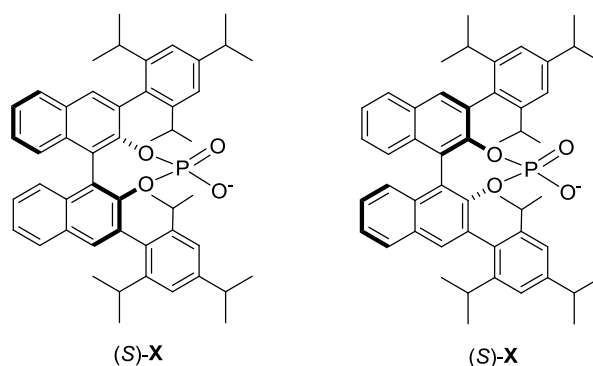

**Part 4:** Improved effect of two cationic gold complexes as catalyst

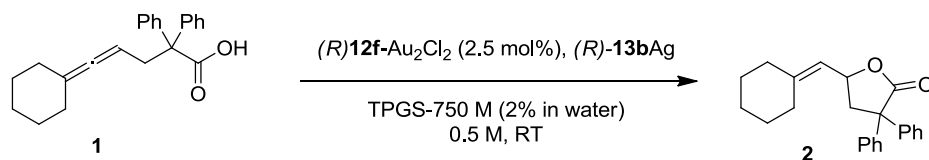

| Entry | $(R)\text{-13bAg}$ | Time (h) | % yield | % ee |
|-------|--------------------|----------|---------|------|
| 1     | 2.5                | 100      | 97      | 49   |
| 2     | 5.0                | 72       | 97      | 75   |

AgCl precipitates were not removed during catalytic reaction.

**Part 5:** Factors affecting *ee*

**Part 5a:** Acid, base, and nanoparticles

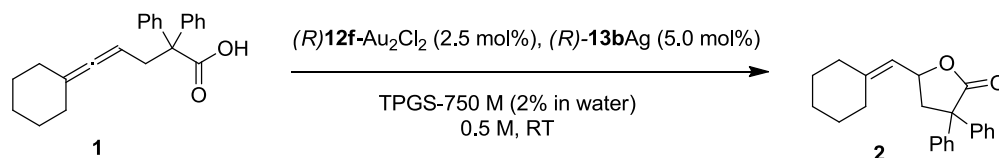

| Entry | Additives (5.0 mol%)  | Time (h) | % yield | % ee |
|-------|-----------------------|----------|---------|------|
| 1     | Au nanoparticles      | 32       | 90      | 12   |
| 2     | $\text{Et}_3\text{N}$ | 9.0      | 92      | 33   |
| 3     | TsOH                  | 5.1      | 88      | 18   |
| 4     | ambient light         | 100      | 80      | 50   |



**Part 5b. Excess Ligand-AuCl or counterion**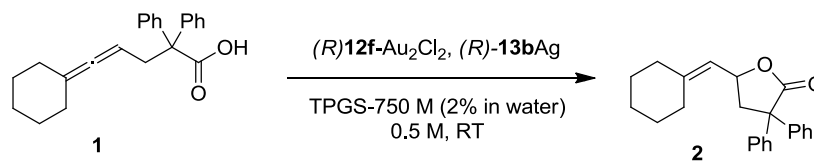

| Entry | $(R)\text{-12f-Au}_2\text{Cl}_2$<br>(mol%) | $(R)\text{-13bAg}$<br>(mol%) | Time (h) | % yield | % ee |
|-------|--------------------------------------------|------------------------------|----------|---------|------|
| 1     | 2.5                                        | 4.5                          | 80       | 97      | 58   |
| 2     | 2.5                                        | 5.0                          | 72       | 97      | 75   |
| 3     | 2.5                                        | 5.5                          | 60       | 97      | 60   |
| 4     | 2.5                                        | 10.0                         | 32       | 98      | 38   |
| 5     | -                                          | 10.0                         | 120      | 90      | 27   |

**Part 6: Factors affecting reaction rate****Part 6a: Surfactant (TPGS-750-M) concentration in water**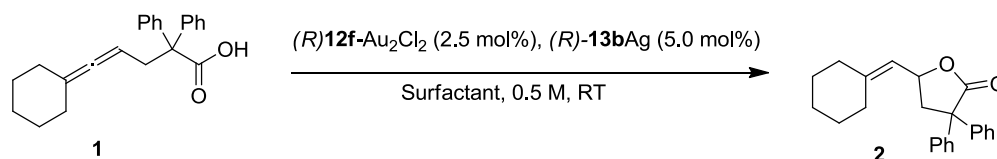

| Entry | TPGS-750-M in H <sub>2</sub> O | Time (h) | % yield |
|-------|--------------------------------|----------|---------|
| 1     | Neat water                     | 100      | NR      |
| 2     | 1%                             | 100      | 67      |
| 3     | 2%                             | 72       | 97      |
| 4     | 3%                             | 70       | 98      |
| 4     | 4%                             | 95       | 97      |

**Part 6b:** Surfactants other than TPGS-750M

| Entry | Surfactant (2 wt% in water) | Time (h) | % yield |
|-------|-----------------------------|----------|---------|
| 1     | Nok                         | 80       | 68      |
| 2     | Pluronic                    | 120      | 50      |
| 3     | PQS                         | 240      | 31      |
| 4     | Reduced PQS                 | 90       | 89      |
| 4     | PTS                         | 128      | 81      |

**Part 7:** Reducing the reaction time by softening solid substrates with solvent additives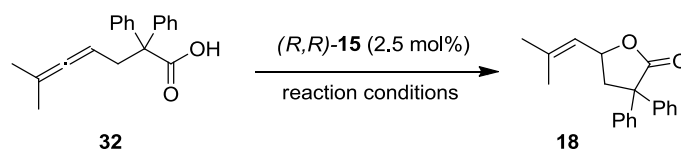

| Entry | *Reaction conditions                                                                            | Time (h) | % yield | % ee |
|-------|-------------------------------------------------------------------------------------------------|----------|---------|------|
| 1     | Mixing solutions of <i>(R,R)</i> - <b>15</b> in 3 wt. % PTS and <b>32</b> in 3 wt. % TPGS-750-M | 44       | 95      | 80   |
| 2     | softening all solids in 2-3 drops of DMF followed by slow addition of 3% TPGS-750-M             | 12       | 94      | 83   |
| 3     | DMF                                                                                             | 15       | 71      | 23   |
| 4     | DMSO-TPGS-750-M                                                                                 | 12       | 83      | 84   |
| 5     | DMSO                                                                                            | 13       | 69      | 36   |
| 6     | toluene-TPGS-750-M                                                                              | 12       | 98      | 84   |
| 7     | Toluene                                                                                         | 68       | 82      | 70   |
| 8     | Benzene-TPGS-750-M                                                                              | 13       | 98      | 84   |
| 9     | Benzene                                                                                         | 70       | 80      | 80   |

\*organic solvent was used only for enhancing the solubility of solid materials, and only few drops of solvent was required to make a homogenous paste of solid. Substrate **32** was chosen due to its excellent crystalline nature.

## Part 8: Final optimized conditions

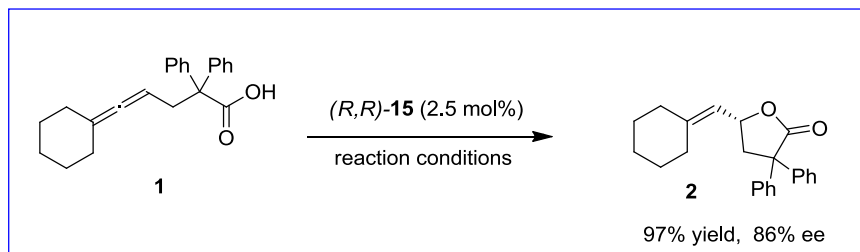

Reaction conditions: 0.06 mmol **1** and  $1.5 \times 10^{-3}$  mmol  $(R,R)$ -**15** in 3-4 drops of toluene or benzene followed by slow addition of 0.2-0.3 mL 3% TPGS-750-M in water, RT, 16 h.

## Part 9: E Factor and recycling studies

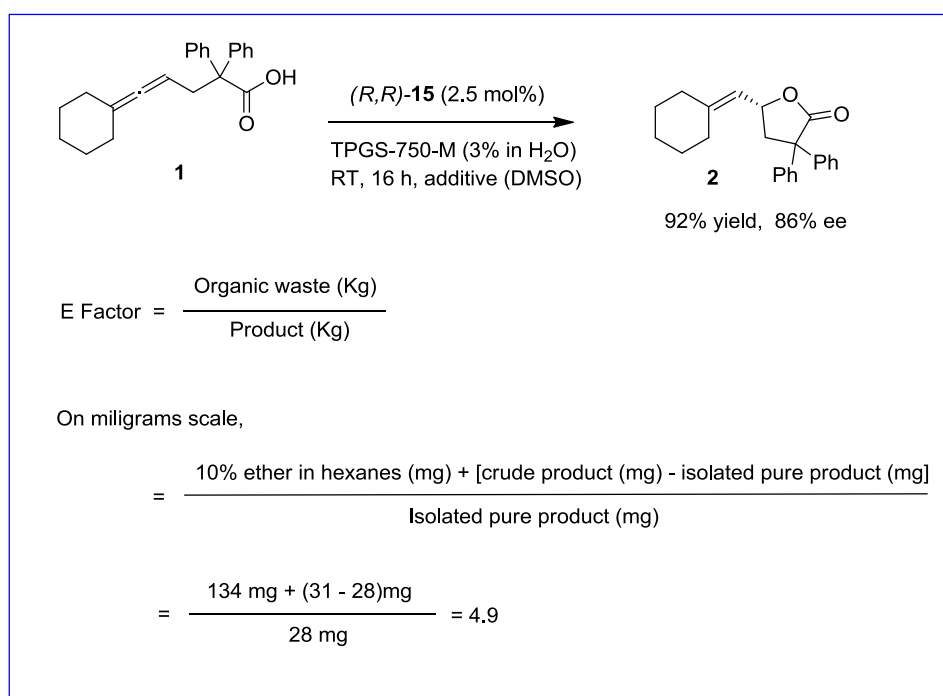

### Procedure:

Caution: During the entire procedure, the reaction vial was covered with aluminum foil and protected from light. Effective and uniform stirring was the key for these reactions to occur smoothly and reproducibly. Acid **1** (29 mg, 0.09 mmol) and  $(R,R)$ -**15f** (9.0 mg 0.002 mmol) were placed into a 4.0 mL reaction vial fitted with a cap containing a PTFE septum. The reaction vial was evacuated and purged with argon. Distilled DMSO (3-4 drops) was added to the mixture, which was then stirred for 2-3 min.

With uniform stirring under an argon atmosphere, 0.2 mL TPGS-750-M (3 wt. % in water) was slowly added to the reaction mixture that was then stirred for 16 h at RT. Approximately 0.2 (weighed 134 mg) mL solution of 10% ether in hexanes was added to the reaction mixture. After stirring for 5 min, the reaction mixture was left undisturbed for 5 min resulting in separation of the organic (containing product) and aqueous (containing surfactant and most of the catalyst) layers. The organic layer was separated, and the volatiles were removed under reduced pressure to obtain a partially pure product as a solid (31.0 mg) which was purified by passing through a silica plug using ether/hexanes (2:3) as eluent. Pure product was obtained as white solid (28.0 mg, 97% yield).

For the recycling studies, to an above aqueous layer (always protected from light), (*R,R*)-**15f** (2.7 mg 0.0009 mmol) was added followed by slow addition of **1** (30 mg, 0.09 mmol). The reaction mixture was vigorously stirred for 16 h at RT after which the same work up procedure was employed. Successive recycling experiments with the same aqueous solution were performed up to 6 times by repeating this procedure (see Table below).

| Recycling of the reaction medium |                                     |                  |               |
|----------------------------------|-------------------------------------|------------------|---------------|
| Run                              | ( <i>R,R</i> )- <b>15</b><br>(mol%) | % Yield <b>2</b> | % ee <b>2</b> |
| 0                                | 3                                   | 97               | 86            |
| 1                                | 1                                   | 97               | 86            |
| 2                                | 1                                   | 96               | 86            |
| 3                                | 1                                   | 97               | 85            |
| 4                                | 1                                   | 95               | 85            |
| 5                                | 1                                   | 96               | 85            |
| 6                                | 1                                   | 96               | 85            |

### Part 10. Crossover experiment: no side reactions

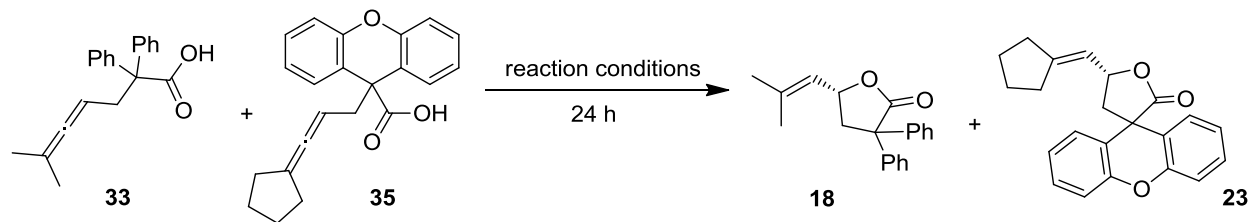

Reaction conditions: Substrate **32** and **33**, cat. (*R,R*)-**15** (3 mol%), 2-drops of toluene, TPGS-750-M (2% in H<sub>2</sub>O), 0.5 M, RT, Ar

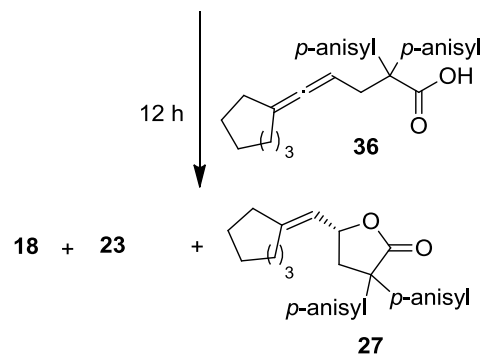

Separable mixture by column chromatography  
(*S*)-**18**, yield 96%, ee 84%; (*S*)-**23**, yield 95%, ee 97%;  
(*S*)-**27**, yield 96%, ee 81%  
-No cross over product, no change in ee, in-flask recycling

### Part 11: Synthesis of gold complexes (pre-catalysts)

Complexes **3A**<sup>[2]</sup>, **5aA**<sup>[3]</sup>, **6A**<sup>[2]</sup>, **7A**<sup>[4]</sup>, **8A**<sup>[5]</sup>, **9A**<sup>[5]</sup>, **11aA**<sup>[3]</sup>, **11bA**<sup>[3]</sup>, **12aA**<sup>[6]</sup>, **12bA**<sup>[7]</sup>, **12cA**<sup>[8]</sup>, and **12dA**<sup>[9]</sup> were synthesized according to literature procedures, with their analytical data in agreement. Complexes **5bA** and **11cA** were generated *in situ* before use. Other complexes **4A**, **10A**, **11dA**, **12eA**, and **12fA** were synthesized according to the general procedure as given below.

In a sealable reaction vessel under an argon atmosphere, the commercially available *bis*(phosphine) ligand (1.0 equiv) was dissolved in 5.0 mL dry CH<sub>2</sub>Cl<sub>2</sub> and the mixture stirred at RT until complete dissolution of all solid material. Under a flow of argon, a solution of (DMS)AuCl (0.5 equiv) in 2.0 mL dry CH<sub>2</sub>Cl<sub>2</sub> was slowly added to the above solution. The reaction vessel was sealed and the contents stirred overnight at RT. All volatiles were then removed under reduced pressure at RT to obtain the crude complex as a viscous oil. The oil was triturated with dry pentane to obtain a white solid. The

pentane was then decanted and the solid redissolved in 0.5 mL dry  $\text{CH}_2\text{Cl}_2$ . After slow addition of dry  $\text{Et}_2\text{O}$ , pure compound was obtained as white crystals. The crystals were filtered through a frit, and dried under reduced pressure.

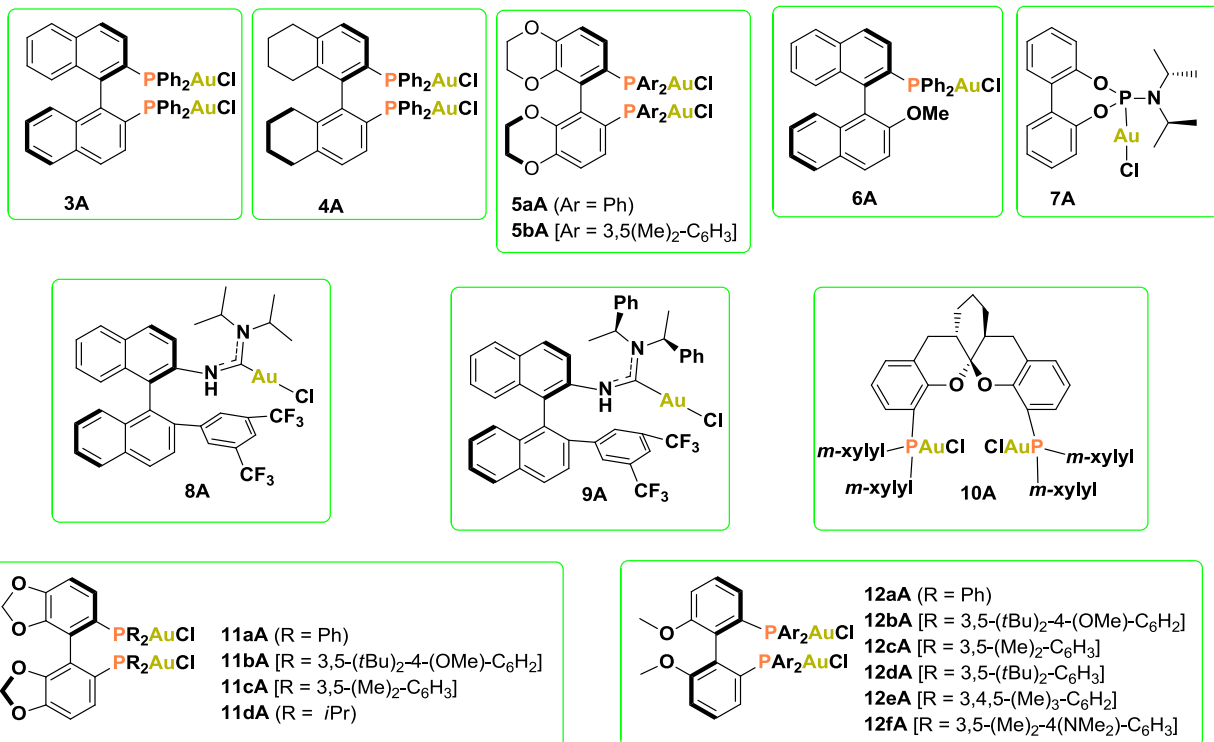

#### Analytical data:

**(*R*)-H<sub>8</sub>-BINAP-Au<sub>2</sub>Cl<sub>2</sub> (4aA).** White solid, yield 81% (282 mg); <sup>1</sup>H NMR (400 MHz, CDCl<sub>3</sub>) δ 7.40-7.26 (m, 14H), 7.20-7.08 (m, 10H), 3.17-3.10 (m, 2H), 2.86 (t, *J* = 6.8 Hz, 1H), 2.82 (t, *J* = 6.8 Hz, 1H), 2.80 (t, *J* = 6.8 Hz, 1H), 2.34 (t, *J* = 6.8 Hz, 1H), and 1.99-1.65 (m, 10H). <sup>31</sup>P NMR (162 MHz, CDCl<sub>3</sub>) δ 19.8.

**(*5S,8S*)-1,13-bis(bis(3,5-Dimethylphenyl)phosphino)-hexahydro-5*H*-chromeno[3,2-*d*]xanthenes-Au<sub>2</sub>Cl<sub>2</sub> (10A).** White solid, yield 78% (32 mg); <sup>1</sup>H NMR (400 MHz, CDCl<sub>3</sub>) δ 7.32-7.15 (m, 6H), 7.07-7.01 (M, 7H), 6.91-6.87 (M, 3H), 6.27-6.54 (m, 2H), 2.47-2.41 (m, 8H), 1.84-1.82 (m, 1H), 1.68-1.66 (m, 2H), and 1.46-1.44 (m, 1H). <sup>31</sup>P NMR (162 MHz, CDCl<sub>3</sub>) δ 22.9.

**(R)-5,5'-bis(Diisopropylphosphino)-4,4'-bibenzo[d][1,3]dioxole-Au<sub>2</sub>Cl<sub>2</sub> (11dA).** White solid, yield 93% (184 mg); <sup>1</sup>H NMR (400 MHz, CDCl<sub>3</sub>) δ 7.25 (d, *J* = 8.4 Hz, 1H), 7.22 (d, *J* = 8.4 Hz, 1H), 7.15 (dd, *J* = 8.4, 1.2 Hz, 2H), 6.00 (d, *J* = 2.0 Hz, 4H), 2.65-2.56 (m, 2H), 2.54-2.43 (m, 2H), 1.39 (d, *J* = 6.8 Hz, 3H), 1.35 (d, *J* = 6.8 Hz, 3H), 1.33 (d, *J* = 6.8 Hz, 3H), 1.31 (d, *J* = 6.8 Hz, 3H), 1.29 (d, *J* = 7.2 Hz, 3H), 1.27 (d, *J* = 7.2 Hz, 3H), 1.14 (d, *J* = 7.2 Hz, 3H), and 1.10 (d, *J* = 7.2 Hz, 3H). <sup>31</sup>P NMR (162 MHz, CDCl<sub>3</sub>) δ 43.8.

**(R)-(6,6'-Dimethoxy-[1,1'-biphenyl]-2,2'-diyl)bis(bis(3,4,5-trimethylphenyl)phosphine)-Au<sub>2</sub>Cl<sub>2</sub> (12eA).** White solid, yield 87% (135 mg), <sup>1</sup>H NMR (400 MHz, CDCl<sub>3</sub>) δ 7.60 (dt, *J* = 8.4, 3.0 Hz, 2H), 7.06 (d, *J* = 8.0 Hz, 1H), 7.03 (d, *J* = 8.0 Hz, 1H), 7.01 (d, *J* = 8.0 Hz, 2H), 6.72 (s, 2H), 6.68 (s, 2H), 6.59 (s, 2H), 6.56 (s, 2H), 3.87 (s, 6H), 3.87 (s, 6H), 3.80 (s, 12H), 3.71 (s, 12H), and 3.24 (s, 6H). <sup>31</sup>P NMR (162 MHz, CDCl<sub>3</sub>) δ 26.3.

**(R)-4,4',4'',4'''-((6,6'-Dimethoxy-[1,1'-biphenyl]-2,2'-diyl)bis(phosphinetriyl))tetrakis-(*N,N*,2,6-tetramethylaniline)-Au<sub>2</sub>Cl<sub>2</sub> (12fA).** White solid, yield 86% (111 mg), <sup>1</sup>H NMR (400 MHz, CDCl<sub>3</sub>) δ 7.57 (dt, *J* = 8.4, 2.4 Hz, 2H), 7.14 (s, 2H), 7.12 (s, 2H), 7.10 (s, 2H), 7.08 (d, *J* = 8.4, 2.4 Hz, 2H), 7.08 (s, 2H), 6.90 (d, *J* = 8.4 Hz, 2H), 2.97 (s, 6H), 2.82 (s, 12H), 2.79 (s, 12H), 2.24 (s, 12H), and 2.22 (s, 12H). <sup>31</sup>P NMR (162 MHz, CDCl<sub>3</sub>) δ 20.1.

## Part 12: Synthesis of nonracemic silver phosphates

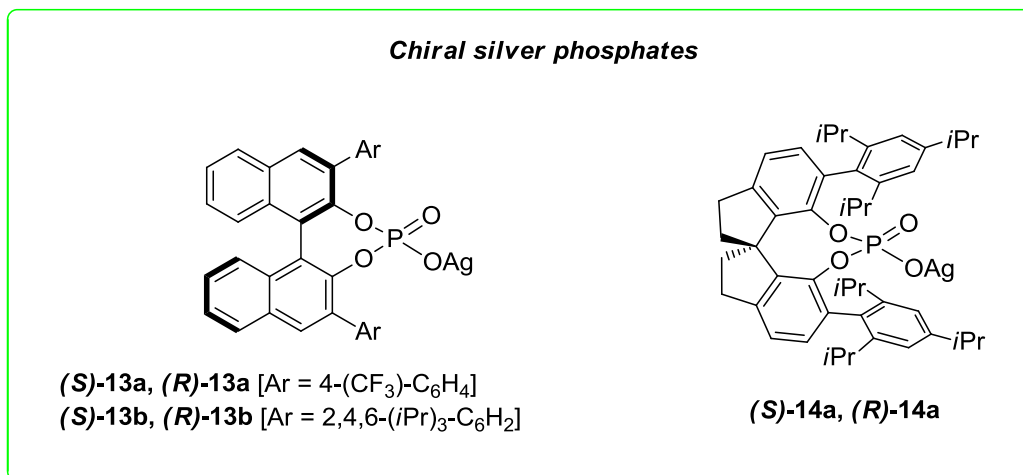

Chiral phosphoric acids and their silver salts were synthesized according to a literature procedure;<sup>[10]</sup> analytical data were in agreement.

## Part 13: Synthesis of catalyst (*R,R*)-15

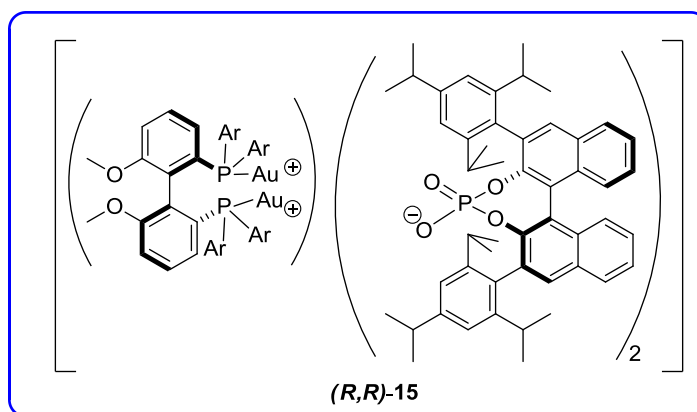

In a sealable reaction vessel, (*R*)-(6,6'-dimethoxy-[1,1'-biphenyl]-2,2'-diyl)bis(bis(3,5-di-*t*-butyl-4-methoxyphenyl)phosphine)-*bis*(gold chloride) (80.0 mg, 0.0495) was dissolved in 10.0 mL dry CH<sub>2</sub>Cl<sub>2</sub>. The reaction vessel was sealed and stirring maintained for 5 min at RT. After 5 min, a solution of (*R*)-silver-3,3'-bis(2,4,6-triisopropylphenyl)-1,1'-binaphthyl-2,2'-phosphate (85.1 mg, 0.099 mmol) in dry



CH<sub>2</sub>Cl<sub>2</sub> was slowly added *via* glass pipette. The reaction vessel was sealed, wrapped with aluminum foil, and stirred for 4 h at RT. The mixture was then filtered through Celite using additional CH<sub>2</sub>Cl<sub>2</sub> (20 mL). The solvent was then evaporated under reduced pressure at RT to obtain crude product as a solid material. The solid was dissolved in 10.0 mL CH<sub>2</sub>Cl<sub>2</sub> and repeatedly filtered through Celite (3 times with a fresh Celite pad). The solvent was evaporated under reduced pressure to obtain solid material which was recrystallized in toluene/isopropanol (with 2 drops of dry DMF) to obtain pure product as a shining white crystalline solid (110 mg, 73%). <sup>1</sup>H NMR (400 MHz, CDCl<sub>3</sub>) δ 7.82-7.77 (m, 4H), 7.68 (d, *J* = 13.6 Hz, 4H), 7.39-7.30 (m, 6H), 7.26-7.00 (m, 13H), 6.92-6.88 (m, 7H), 6.62 (br. s, 2H), 6.56 (d, *J* = 8.4 Hz, 2H), 6.37 (dd, *J* = 10.8, 8.4 Hz, 2H), 5.68 (dt, *J* = 8.0, 2.8 Hz, 2H), 3.63 (s, 6H), 3.83 (s, 6H), 3.07-2.97 (m, 4H), 2.82-2.77 (m, 2H), 2.74-2.69 (m, 2H), 2.61-2.55 (m, 2H), 2.55 (s, 6H), 2.42-2.35 (m, 2H), 1.59 (br. s, 6H), 1.39 (d, *J* = 6.0 Hz, 6H), 1.31-0.96 (m, 90 H), 0.95-0.78 (m, 18H), 0.71 (d, *J* = 6.0 Hz, 18H), and 0.54 (d, *J* = 6.0 Hz, 6H). <sup>31</sup>P NMR (400 MHz, CDCl<sub>3</sub>) δ 14.8, and 6.14. Anal Calcd for C<sub>174</sub>H<sub>216</sub>Au<sub>2</sub>O<sub>14</sub>P<sub>4</sub> + 0.4 DMF (solvent content by <sup>1</sup>H NMR): C, 68.55; H, 7.12 %. Found: C, 68.60; H, 7.13%. HRMS [ESI, (C<sub>74</sub>H<sub>104</sub>Au<sub>2</sub>O<sub>6</sub>P<sub>2</sub>)<sup>2+</sup>] Calcd: 772.3319, Found: *m/z* 772.3361.

#### Part 14: General procedure for catalytic reactions

**Asymmetric intramolecular hydrocarboxylation reactions.** Under oxygen-free conditions, enantiomerically and diastereomerically pure chiral gold catalyst (*R,R*)-**15** (2.5 mol %) and pure allenic acid (1.0 equiv) were taken up in a 4.0 mL screw-cap vial fitted with a PTFE/silicone septum. The vial was wrapped with aluminum foil, and a few drops (3-4) of either benzene or toluene were added. The reaction mixture was stirred for 2-3 min to obtain a uniform pasty solid. With uniform stirring, 0.2-0.3 mL of an aqueous solution of freshly prepared TPGS-750-M (3 wt % in water) was slowly added *via* syringe. The septum was wrapped with Parafilm and reaction mixture was effectively stirred at RT until complete consumption of starting allenic acid. Reaction progress was monitored by

TLC using Et<sub>2</sub>O:hexanes as eluent. After complete consumption of starting material, a minimum amount of organic solvent (8-10% ether in hexanes) was added *via* syringe, and the reaction mixture was stirred for 5 min. Stirring was stopped, and reaction mixture was left undisturbed for 5 min resulting in separation of organic (containing product) and aqueous (containing surfactant and most of catalyst) layers. The organic layer was separated, and all volatiles were removed under reduced pressure to obtain a partially pure product. Compounds were purified by flash chromatography and then analyzed by polarimetry, chiral HPLC, and NMR.

**Preparation of racemic material for chiral HPLC analysis.** (PPh<sub>3</sub>)AuCl (5.0 mol %) and AgBF<sub>4</sub> (5.0 mol %) were taken up in a 4.0 mL screw-cap reaction vial fitted with a PTFE/silicone septum. The vial was wrapped with aluminum foil, and CH<sub>2</sub>Cl<sub>2</sub> (2.0 mL) was added to the reaction mixture. The mixture was stirred for 15 min at RT. After 15 min, the solvent was evaporated under reduced pressure to obtain active catalyst as a solid material. To the vial containing active catalyst, a few drops (3-4) of either DMSO or toluene were added. The reaction mixture was stirred for 2-3 min to obtain a uniform pasty solid. With uniform stirring, Et<sub>3</sub>N (10 mol %) and 0.2-0.3 mL aqueous solution of freshly prepared TPGS-750-M (3 wt % in water) was slowly added *via* syringe. The reaction mixture was effectively stirred at RT until complete consumption of starting allenic acid. Reaction progress was monitored by TLC using Et<sub>2</sub>O:hexanes as eluent. After complete consumption of starting material, a minimum amount of organic solvent (8-10% ether in hexanes) was added *via* syringe, and the reaction mixture was stirred for 5 min. Stirring was stopped, and the reaction mixture was left undisturbed for 5 min resulting in separation of organic (containing product) and aqueous (containing surfactant and most of catalyst) layers. The organic layer was separated, and all volatiles were removed under reduced pressure to obtain a partially pure product.

## Part 15: X-Ray crystallographic data and procedures

**X-ray Crystallographic Analysis of (*R,R*)-15.** Colorless blocks were obtained by slow diffusion of methanol into a solution of (*R,R*)-15 in toluene. A sample measuring 0.30 x 0.30 x 0.20 mm was cut from a larger plate for diffraction analysis. The asymmetric unit consists of two crystallographically nonequivalent (*R,R*)-15. The crystal was mounted on a glass fiber and transferred to a Bruker Kappa Apex II diffractometer. The APEX program was used to determine the unit cell parameters and data collection (10 sec / frame, 0.3 deg. /frame for a sphere of diffraction data). The data were collected at 100K using Oxford nitrogen gas cryostream system. The raw frame data were processed using SAINT program. The absorption correction was applied using program SADABS. Subsequent calculations were carried out using SHELXTL program. The structure was solved by direct methods and refined on  $F^2$  by full-matrix least-squares techniques.

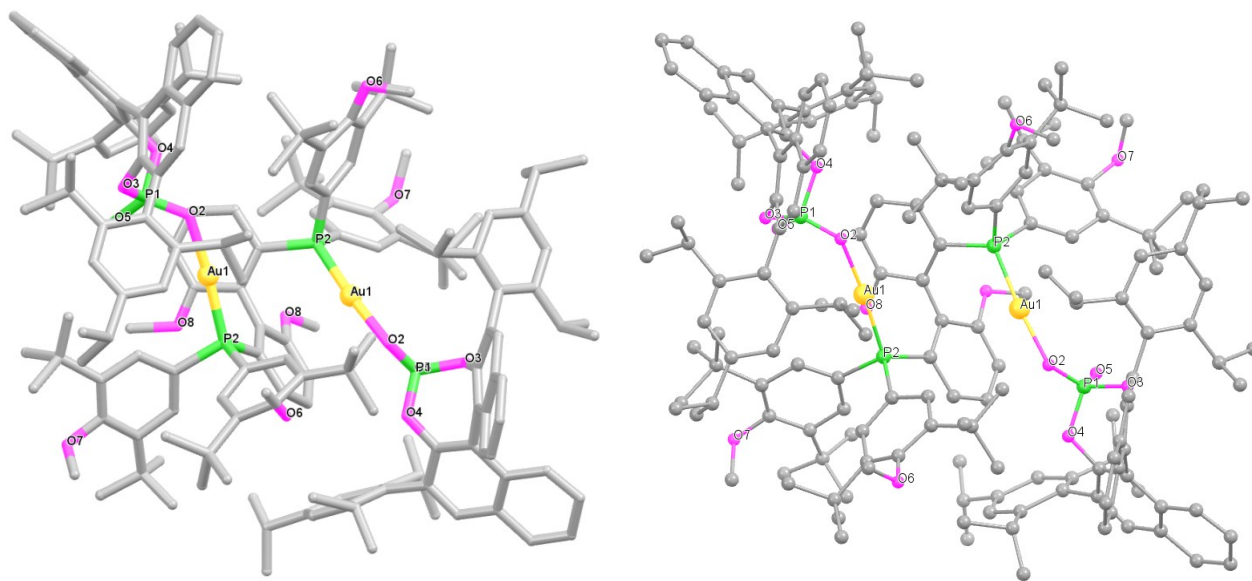

X-ray crystal structure of (*R,R*)-15 (different views)

Table 1. Crystal data and structure refinement for **(R,R)-15**

|                                   |                                             |                       |
|-----------------------------------|---------------------------------------------|-----------------------|
| Empirical formula                 | C174 H216 Au2 O14 P4                        |                       |
| Formula weight                    | 3049.28                                     |                       |
| Temperature                       | 100(2) K                                    |                       |
| Wavelength                        | 71.073 pm                                   |                       |
| Crystal system                    | Orthorhombic                                |                       |
| Space group                       | I222                                        |                       |
| Unit cell dimensions              | a = 1778.49(3) pm                           | $\alpha = 90^\circ$ . |
|                                   | b = 4415.51(8) pm                           | $\beta = 90^\circ$ .  |
|                                   | c = 4521.47(10) pm                          | $\gamma = 90^\circ$ . |
| Volume                            | 35.5068(12) nm <sup>3</sup>                 |                       |
| Z                                 | 8                                           |                       |
| Density (calculated)              | 1.141 Mg/m <sup>3</sup>                     |                       |
| Absorption coefficient            | 1.740 mm <sup>-1</sup>                      |                       |
| F(000)                            | 12720                                       |                       |
| Crystal size                      | 0.25 x 0.2 x 0.05 mm <sup>3</sup>           |                       |
| Theta range for data collection   | 0.64 to 28.28°.                             |                       |
| Index ranges                      | -23 ≤ h ≤ 21, -55 ≤ k ≤ 58, -60 ≤ l ≤ 42    |                       |
| Reflections collected             | 108855                                      |                       |
| Independent reflections           | 44076 [R(int) = 0.0685]                     |                       |
| Completeness to theta = 28.28°    | 100.0 %                                     |                       |
| Absorption correction             | Semi-empirical from equivalents             |                       |
| Max. and min. transmission        | 0.7461 and 0.6208                           |                       |
| Refinement method                 | Full-matrix least-squares on F <sup>2</sup> |                       |
| Data / restraints / parameters    | 44076 / 204 / 852                           |                       |
| Goodness-of-fit on F <sup>2</sup> | 1.785                                       |                       |
| Final R indices [I > 2σ(I)]       | R1 = 0.0853, wR2 = 0.1902                   |                       |
| R indices (all data)              | R1 = 0.1176, wR2 = 0.1991                   |                       |
| Absolute structure parameter      | 0.010(8)                                    |                       |
| Largest diff. peak and hole       | 2.279 and -1.556 e.Å <sup>-3</sup>          |                       |

**X-ray Crystallographic Analysis of (S)-19.** Colorless blocks were obtained by slow diffusion of pentane into a solution of **3a** in CH<sub>2</sub>Cl<sub>2</sub>/Et<sub>2</sub>O (1:1). A sample measuring 0.30 x 0.30 x 0.20 mm was cut from a larger plate for diffraction analysis. The asymmetric unit consists of two crystallographically non-equivalent **19**. C<sub>22</sub>H<sub>22</sub>O<sub>2</sub>, *M*<sub>r</sub> = 318.4 g mol<sup>-1</sup>, monoclinic, space group P2(1), *a* = 860.24(4), *b* = 1027.07(4), *c* = 1012.34(4) pm, β = 98.437(2)°, 0.88475(6) nm<sup>3</sup>, *Z* = 2, ρ<sub>calcd</sub> = 1.195 Mg/m<sup>3</sup>, μ = 0.588 mm<sup>-1</sup>, *T* = 296(2) K, 2θ<sub>max</sub> = 65.14°, 6215 total reflections, 2735 independent [R(int) = 0.0477]. Final R1 indices [*I* > 2σ(*I*)] = R1 = 0.0616, wR2 = 0.1736.

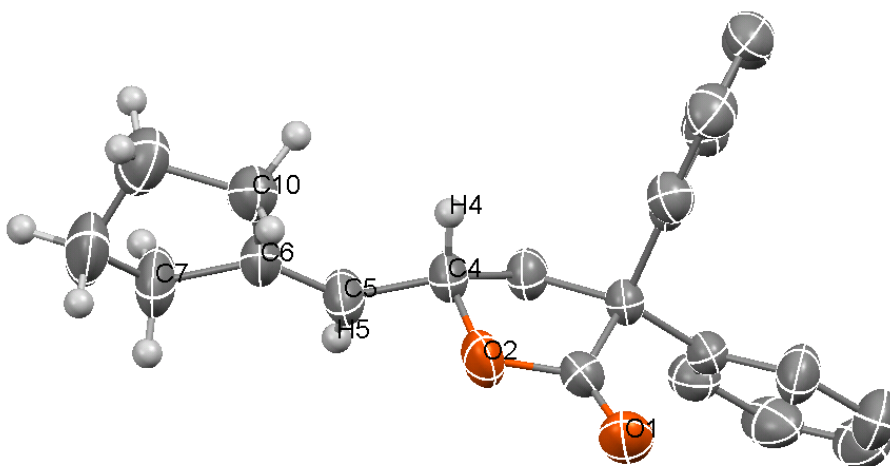

X-ray structure of (S)-19

Table 2. Crystal data and structure refinement for **(S)-19**.

|                                   |                                                |                             |
|-----------------------------------|------------------------------------------------|-----------------------------|
| Empirical formula                 | C <sub>22</sub> H <sub>22</sub> O <sub>2</sub> |                             |
| Formula weight                    | 318.40                                         |                             |
| Temperature                       | 296(2) K                                       |                             |
| Wavelength                        | 154.178 pm                                     |                             |
| Crystal system                    | Monoclinic                                     |                             |
| Space group                       | P2(1)                                          |                             |
| Unit cell dimensions              | a = 860.24(4) pm                               | $\alpha = 90^\circ$ .       |
|                                   | b = 1027.07(4) pm                              | $\beta = 98.437(2)^\circ$ . |
|                                   | c = 1012.34(4) pm                              | $\gamma = 90^\circ$ .       |
| Volume                            | 0.88475(6) nm <sup>3</sup>                     |                             |
| Z                                 | 2                                              |                             |
| Density (calculated)              | 1.195 Mg/m <sup>3</sup>                        |                             |
| Absorption coefficient            | 0.588 mm <sup>-1</sup>                         |                             |
| F(000)                            | 340                                            |                             |
| Crystal size                      | 0.30 x 0.30 x 0.20 mm <sup>3</sup>             |                             |
| Theta range for data collection   | 4.42 to 65.14°.                                |                             |
| Index ranges                      | -9 ≤ h ≤ 8, -12 ≤ k ≤ 11, -11 ≤ l ≤ 11         |                             |
| Reflections collected             | 6215                                           |                             |
| Independent reflections           | 2735 [R(int) = 0.0477]                         |                             |
| Completeness to theta = 65.14°    | 97.0 %                                         |                             |
| Absorption correction             | Semi-empirical from equivalents                |                             |
| Max. and min. transmission        | 0.75264 and 0.4409                             |                             |
| Refinement method                 | Full-matrix least-squares on F <sup>2</sup>    |                             |
| Data / restraints / parameters    | 2735 / 1 / 218                                 |                             |
| Goodness-of-fit on F <sup>2</sup> | 1.069                                          |                             |
| Final R indices [I > 2σ(I)]       | R1 = 0.0616, wR2 = 0.1736                      |                             |
| R indices (all data)              | R1 = 0.0619, wR2 = 0.1741                      |                             |
| Absolute structure parameter      | -0.4(4)                                        |                             |
| Extinction coefficient            | 0.008(2)                                       |                             |
| Largest diff. peak and hole       | 0.228 and -0.172 e.Å <sup>-3</sup>             |                             |

**Part 16:** General scheme for the syntheses of substrates<sup>[11]</sup>

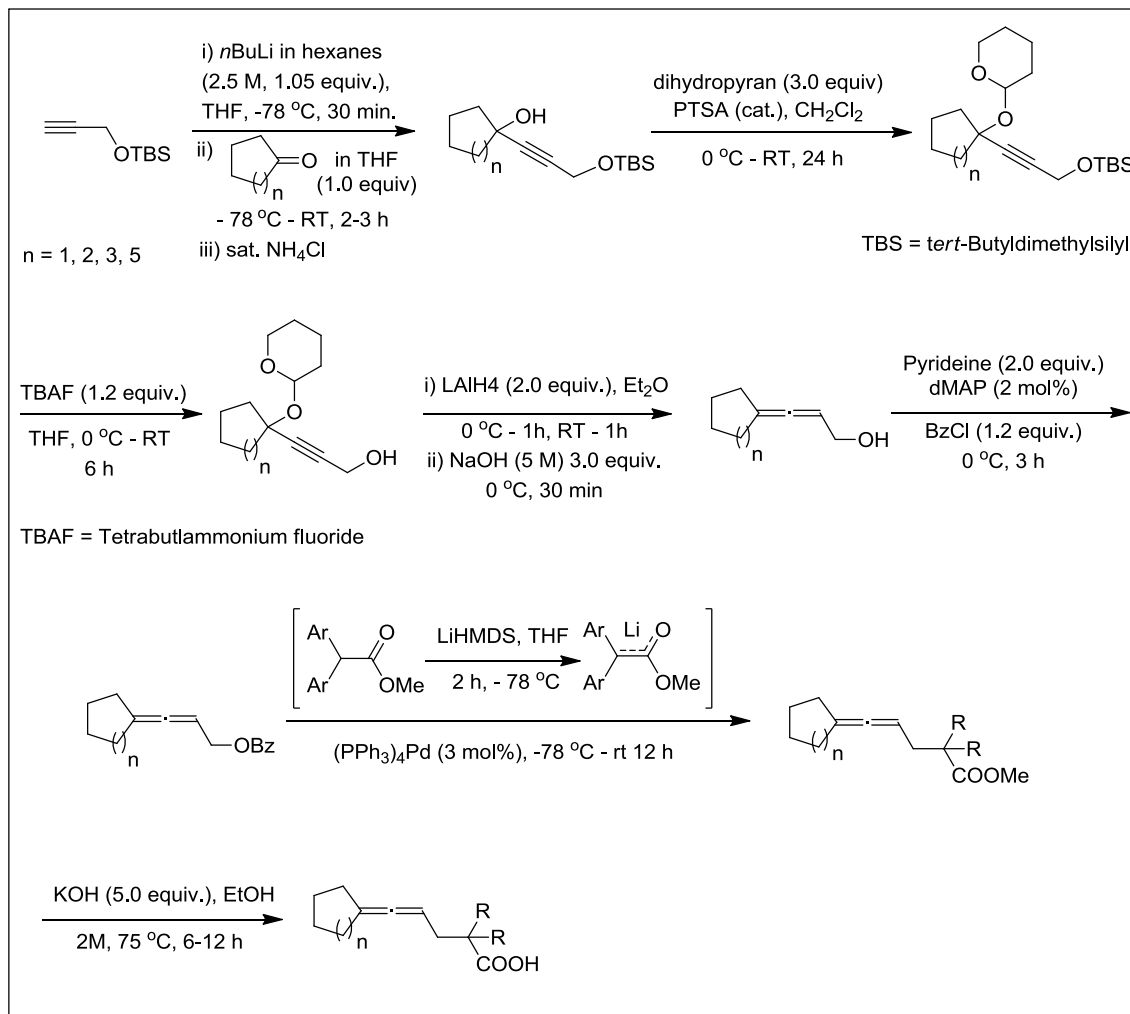

**1-[3-((*t*-Butyldimethylsilyl)oxy)prop-1-yn-1-yl]cyclopentanol**

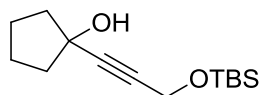

To a well dried 500 mL two neck round-bottom flask equipped with a septum and air condenser having an argon balloon atop, a solution of *t*-butyldimethyl(prop-2-yn-1-yloxy)silane (10.0 g, 58.78 mmol) in 100 mL dry THF was added. The reaction mixture was cooled to -78 °C, and then 22.4 mL *n*-BuLi (2.5 M in hexanes) was very slowly added *via* syringe. The reaction mixture was stirred for 45 min

at -78 °C. After 45 min, a solution of cyclopentanone (5.2 mL, 58.78 mmol) in 10 mL dry THF was slowly added to the reaction mixture. After addition, the reaction mixture was stirred for 50 min at -78 °C, and an additional 2 h at RT. The reaction mixture was quenched with 60 mL of 0.5 M aqueous NH<sub>4</sub>Cl. The organic layer was separated, and aqueous layer was extracted with diethyl ether (50 x 2). The combined organic extracts were washed with brine and dried over anhydrous MgSO<sub>4</sub>. Volatiles were removed *via* rotary evaporation and then high vacuum to obtain pure compound as colorless oil. Yield 14.5 g (97%), *R<sub>f</sub>* = 0.45 (1:9, Et<sub>2</sub>O/hexanes). <sup>1</sup>H NMR (400 MHz, CDCl<sub>3</sub>) δ 4.35 (s, 2H), 2.04 (br. s, 1H, OH), 1.89-1.82 (m, 2H), 1.72-1.59 (m, 2H), 1.58-1.46 (m, 4H), 0.90 (s, 9H), and 0.12 (s, 6H) ppm. <sup>13</sup>C NMR (100 MHz, CDCl<sub>3</sub>) δ 88.6, 81.9, 74.6, 51.9, 42.4, 26.0, 23.5, and - 4.9. IR (neat) ν = 3275, 2357, 1103, 1070 cm<sup>-1</sup>. HRMS [ESI, (C<sub>14</sub>H<sub>26</sub>O<sub>2</sub>Si+H)<sup>+</sup>] Calcd: 255.1780, Found: *m/z* 255.1789.

**1-[3-((*t*-Butyldimethylsilyl)oxy)prop-1-yn-1-yl]cyclohexanol<sup>[11]</sup>**

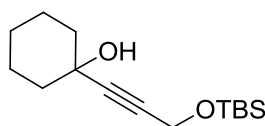

Viscous oil, yield 12.9 g (89%), *R<sub>f</sub>* = 0.66 (1:19, Et<sub>2</sub>O/hexanes). <sup>1</sup>H NMR (400 MHz, CDCl<sub>3</sub>) δ 5.07 (dd, *J* = 5.2, 1.2 Hz, 1H), 4.36 (s, 2H), 3.96-3.90(m, 1H), 3.49-3.44 (m, 1H), 2.00-1.97 (m, 1H), 1.85-1.80 (m, 2H), 1.72-1.56 (m, 6H), 1.55-1.46 (m, 6H), 1.28-1.20 (m, 1H), 0.89 (s, 1H), and 0.11 (s, 6H). <sup>13</sup>C NMR (101MHz, CDCl<sub>3</sub>) δ 96.0, 86.2, 84.7, 75.2, 63.8, 51.9, 38.9, 38.5, 32.3, 29.9, 25.6, 25.4, 20.8, 18.4, and -4.9. IR (neat) ν 3279, 2358, 1059, 1071 cm<sup>-1</sup>. HRMS [ESI,(C<sub>20</sub>H<sub>36</sub>O<sub>3</sub>Si+H)<sup>+</sup>] Calcd: 353.2511, Found: *m/z* 353.2516.

**1-[3-((*t*-Butyldimethylsilyl)oxy)prop-1-yn-1-yl]cycloheptanol**



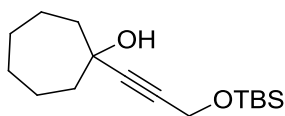

White solid (mp 62-63 °C), yield 13.2 g (91%),  $R_f = 0.41$  (1:9, Et<sub>2</sub>O/hexanes). <sup>1</sup>H NMR (400 MHz, CDCl<sub>3</sub>) δ 4.35 (s, 2H), 2.01 (d,  $J = 8.0$  Hz, 1H), 1.98 (d,  $J = 8.0$  Hz, 1H), 1.85-1.77 (m, 3H), 1.67-1.49 (m, 7H), 0.91 (s, 9H), and 0.12 (s, 6H). <sup>13</sup>C NMR (101 MHz, CDCl<sub>3</sub>) δ 89.7, 82.1, 71.8, 51.9, 43.1, 28.3, 25.9, 22.3, and - 4.9. IR (neat) ν 3271, 2357, 1103, 1071 cm<sup>-1</sup>. HRMS[ESI, (C<sub>16</sub>H<sub>30</sub>O<sub>2</sub>Si+H)<sup>+</sup>] Calcd: 283.2093, Found:  $m/z$  283.2090.

### 1-[3-((*t*-Butyldimethylsilyl)oxy)prop-1-yn-1-yl]cyclooctanol

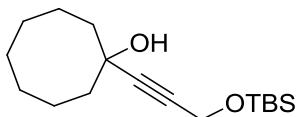

Oil, yield 13.2 g (91%),  $R_f = 0.44$  (1:9, Et<sub>2</sub>O/hexanes). <sup>1</sup>H NMR (500 MHz, CDCl<sub>3</sub>) δ 4.34 (s, 2H), 2.42-2.39 (m, 1H), 1.97-1.84 (m, 5H), 1.62-1.46 (m, 9H), 0.90 (s, 9H), and 0.12 (s, 6H). <sup>13</sup>C NMR (126 MHz, CDCl<sub>3</sub>) δ 89.3, 81.9, 71.3, 51.8, 41.9, 38.1, 27.9, 27.2, 25.8, 24.5, and - 5.1. IR (neat) ν 3278, 2355, 1101, 1075. HRMS [ESI, (C<sub>17</sub>H<sub>32</sub>O<sub>2</sub>Si+H)<sup>+</sup>] Calcd: 297.2250, Found:  $m/z$  297.2251.

### 5-[3-((*t*-Butyldimethylsilyl)oxy)-2-methylpent-3-yn-2-yl]<sup>[12]</sup>

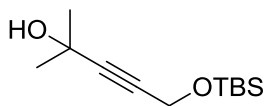

Viscous oil, yield 5.7 g (90%),  $R_f = 0.48$  (1:9, Et<sub>2</sub>O/hexanes). <sup>1</sup>H NMR (500 MHz, CDCl<sub>3</sub>) δ 4.33 (s, 2H), 1.88 (br. s, 1H), 1.51 (s, 6H), 0.91 (s, 9H), and 0.13 (s, 6H).

### *t*-Butyldimethyl[(3-(1-((tetrahydro-2*H*-pyran-2-yl)oxy)cyclopentyl)prop-2-yn-1-yl)oxy]silane

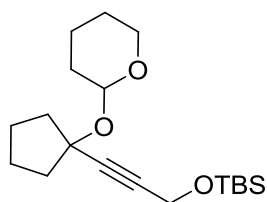

*p*-Toluenesulfonic acid monohydrate (37.5 mg, 0.197 mmol) was added to a solution of 1-(3-((*t*-butyldimethylsilyloxy)prop-1-yn-1-yl)cyclopentanol (10 g, 39.30 mmol) in 50 mL dry dichloromethane, and the reaction mixture was stirred for 10 min at 0 °C. After 10 min, dihydropyran (10 mL, 117.9 mmol) was added and the mixture stirred at 0 °C for 6 h followed by 18 h stirring at RT. It was then quenched with 5 mL of triethylamine and stirred for additional 20 min at RT. The DCM was evaporated *in vacuo* to obtain crude compound as a yellow viscous oil. The material was dissolved in 200 mL diethyl ether and washed sequentially with 0.5 N NaHCO<sub>3</sub>, water, and brine. The organic layer was separated and dried over anhydrous MgSO<sub>4</sub>. Volatiles were evacuated by rotary evaporation to obtain crude product as a viscous oil. Pure product was obtained by flash chromatography over the silica using ether:hexanes (2:98, 5:95) as eluent. Viscous oil, yield 11.9 g (90%), *R*<sub>f</sub> = 0.55 (1:9, Et<sub>2</sub>O/hexanes). <sup>1</sup>H NMR (400 MHz, CDCl<sub>3</sub>) δ 5.04 (dd, *J* = 5.6, 3.2 Hz, 1H), 4.35 (s, 2H), 3.94-3.89 (m, 1H), 3.53-3.47 (m, 1H), 2.24-2.18 (m, 1H), 2.00-1.47 (m, 13H), 0.91 (s, 9H), and 0.12 (s, 6H). <sup>13</sup>C NMR (101 MHz, CDCl<sub>3</sub>) δ 96.7, 86.6, 83.3, 81.0, 63.6, 52.0, 41.4, 40.0, 32.1, 25.9, 25.6, 23.4, 23.0, 20.5, 18.4, and -4.9.

***t*-Butyldimethyl[(3-(1-((tetrahydro-2*H*-pyran-2-yl)oxy)cyclohexyl)prop-2-yn-1-yl)oxy]silane**

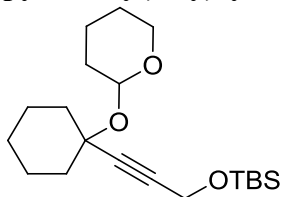

Viscous oil, yield 9.84 g (78%), *R*<sub>f</sub> = 0.51 (1:9, Et<sub>2</sub>O/hexanes). <sup>1</sup>H NMR (400 MHz, CDCl<sub>3</sub>) δ 5.07 (dd, *J* = 5.2, 1.2 Hz, 1H), 4.36 (s, 2H), 3.96-3.90 (m, 1H), 3.49-3.44 (m, 1H), 2.00-1.97 (m, 1H), 1.85-

1.80 (m, 2H), 1.72-1.56 (m, 6H), 1.55-1.46 (m, 6H), 1.28-1.20 (m, 1H), 0.89 (s, 1H), and 0.11 (s, 6H).  $^{13}\text{C}$  NMR (101 MHz,  $\text{CDCl}_3$ )  $\delta$  96.0, 86.2, 84.7, 75.2, 63.8, 51.9, 38.9, 38.5, 32.3, 29.9, 25.6, 25.4, 20.8, 18.4, and -4.9.

***t*-Butyldimethyl[(3-(1-((tetrahydro-2*H*-pyran-2-yl)oxy)cycloheptyl)prop-2-yn-1-yl)oxy]silane**

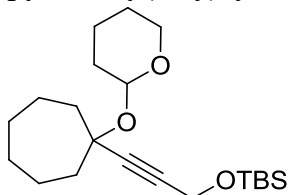

Viscous oil, yield 9.8 g (70%),  $R_f = 0.57$  (1:9,  $\text{Et}_2\text{O}$ /hexanes).  $^1\text{H}$  NMR (500 MHz,  $\text{CDCl}_3$ )  $\delta$  5.07-5.05 (m, 1H), 4.37 (s, 2H), 3.97-3.92 (m, 1H), 3.51-3.45 (m, 1H), 2.02-1.96 (m, 3H), 1.88-1.82 (m, 2H), 1.73-1.49 (m, 13H), 0.91 (s, 9H), and 0.13 (s, 6H).  $^{13}\text{C}$  NMR (126 MHz,  $\text{CDCl}_3$ )  $\delta$  96.1, 87.5, 83.8, 78.4, 63.8, 52.0, 42.2, 40.9, 32.4, 28.8, 25.9, 25.6, 22.2, 22.0, 20.8, 18.4, and -4.9. IR (neat)  $\nu = 3275, 2355, 1102, 1075\text{ cm}^{-1}$ . HRMS [ESI,  $(\text{C}_{21}\text{H}_{38}\text{O}_3\text{Si}+\text{H})^+$ ] Calcd: 367.2668, Found:  $m/z$  367.2671.

***t*-Butyldimethyl[(3-(1-((tetrahydro-2*H*-pyran-2-yl)oxy)cyclooctyl)prop-2-yn-1-yl)oxy]silane**

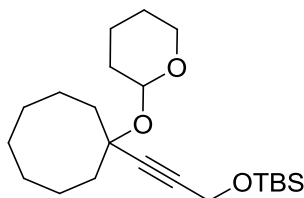

Viscous oil, yield 5.7 g (89%),  $R_f = 0.60$  (1:9,  $\text{Et}_2\text{O}$ /hexanes).  $^1\text{H}$  NMR (400 MHz,  $\text{CDCl}_3$ )  $\delta$  5.07-5.06 (m, 1H), 4.36 (s, 2H), 3.97-3.92 (m, 1H), 3.51-3.46 (m, 1H), 2.01-1.96 (m, 1H), 1.96-1.81 (m, 4H), 1.68-1.46 (m, 15H), 0.91 (s, 9H), and 0.13 (s, 6H). IR (neat)  $\nu 3270, 2350, 1102, 1078\text{ cm}^{-1}$ . HRMS [ESI,  $(\text{C}_{22}\text{H}_{40}\text{O}_3\text{Si}+\text{H})^+$ ] Calcd: 381.2825, Found:  $m/z$  381.2831.

***t*-Butyldimethyl[(4-methyl-4-((tetrahydro-2*H*-pyran-2-yl)oxy)pent-2-yn-1-yl)silane]<sup>[13]</sup>**

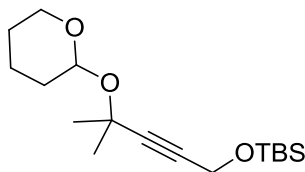

Viscous oil, yield 5.9 g (67%),  $R_f = 0.46$  (1: 9, Et<sub>2</sub>O/hexanes). <sup>1</sup>H NMR (600 MHz, CDCl<sub>3</sub>) δ 5.04-5.03 (m, 1H), 4.34 (s, 2H), 3.95-3.92 (m, 1H), 3.50-3.47 (m, 1H), 1.85-1.83 (m, 1H), 1.71 1.67 (m, 1H), 1.52 (s, 6H), 1.48 (s, 4H), 0.91 (s, 9H), and 0.12 (s, 6H). <sup>13</sup>C NMR (151 MHz, CDCl<sub>3</sub>) δ 96.4, 87.3, 82.8, 71.3, 63.6, 51.9, 32.1, 30.8, 29.8, 25.9, 25.5, 20.8, and - 4.9. IR (neat) ν 3275, 2368, 1110, 1079 cm<sup>-1</sup>. HRMS [ESI, (C<sub>17</sub>H<sub>32</sub>O<sub>3</sub>Si+H)+] Calcd: 313.2199, Found:  $m/z$  313.2198.

**3-[1-((Tetrahydro-2*H*-pyran-2-yl)oxy)cyclopentyl]prop-2-yn-1-ol**

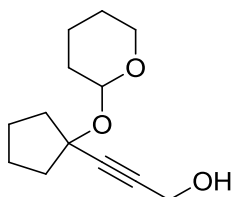

Tetrabutylammonium fluoride (9.52 g, 36.41 mmol) was added to a solution of *tert*-butyldimethyl[(3-(1-((tetrahydro-2*H*-pyran-2-yl)oxy)cyclopentyl)prop-2-yn-1-yl)oxy]silane (10.0 g, 30.34 mmol) in 50 mL THF at 0 °C, and reaction mixture was stirred for overnight at RT. After complete consumption of the starting material as monitored by TLC, the reaction mixture was diluted with 100 mL EtOAc, and washed thoroughly with water. The organic layer was separated and dried over anhydrous MgSO<sub>4</sub>. The solvent was evacuated *via* rotary evaporation to obtain crude compound as a yellow oil. The crude compound was purified by column chromatography over silica, using ether/hexanes as eluent (1:4). Viscous oil, yield 5.1 g (76%),  $R_f = 0.44$  (2:3, ether/hexanes). <sup>1</sup>H NMR

(400 MHz, CDCl<sub>3</sub>)  $\delta$  5.05 (dd,  $J = 4.8, 3.2$  Hz, 1H), 4.28 (d,  $J = 6.4$  Hz, 2H), 3.95-3.89 (m, 1H), 3.54-3.49 (m, 1H), 2.37-2.30 (m, 1H), 2.22-2.15 (m, 1H), 2.01-1.88 (m, 2H), 1.85-1.75 (m, 4H), 1.74-1.64 (m, 3H), and 1.58-1.48 (m, 4H). <sup>13</sup>C NMR (101 MHz, CDCl<sub>3</sub>)  $\delta$  96.3, 87.4, 83.0, 80.7, 63.3, 51.2, 41.2, 40.3, 32.0, 25.5, 23.4, 23.0, and 20.1.

**3-[1-((Tetrahydro-2H-pyran-2-yl)oxy)cyclohexyl]prop-2-yn-1-ol<sup>[14]</sup>**

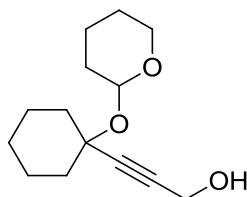

Viscous oil, yield 4.5 g (75%),  $R_f = 0.41$  (2:3, ether/hexanes). <sup>1</sup>H NMR (400 MHz, CDCl<sub>3</sub>)  $\delta$  5.13-5.11 (m, 1H), 4.32 (d,  $J = 6.4$  Hz, 2H), 3.99-3.93 (m, 1H), 3.53-3.45 (m, 1H), 2.01-1.99 (m, 2H), 1.87-1.71 (m, 2H), 1.70-1.51 (m, 12H).

**3-[1-((Tetrahydro-2H-pyran-2-yl)oxy)cycloheptyl]prop-2-yn-1-ol**

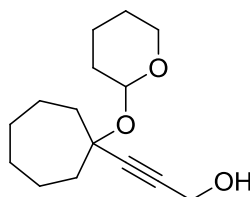

Viscous oil, yield 7.2 g (77%),  $R_f = 0.55$  (1:4, EtOAc/hexanes). <sup>1</sup>H NMR (600 MHz, CDCl<sub>3</sub>)  $\delta$  5.08 (dd,  $J = 5.2, 3.6$  Hz, 1H), 4.30 (d,  $J = 5.4$  Hz, 2H), 3.97-3.93 (m, 1H), 3.52-3.48 (m, 1H), 2.09 (br. s, 1H, OH), 2.08-1.95 (m, 2H), 1.96 (d,  $J = 7.6$  Hz, 1H), 1.90-1.79 (m, 2H), 1.72-1.57 (m, 3H), and 1.56-1.46 (m, 10H). <sup>13</sup>C NMR (151 MHz, CDCl<sub>3</sub>)  $\delta$  95.6, 88.5, 83.5, 78.1, 63.3, 51.3, 41.9, 41.2, 32.3, 28.7, 28.2, 25.7, 22.3, 22.0, and 20.4. IR (neat)  $\nu$  3311, 3258, 2358, 1101, 1066 cm<sup>-1</sup>. HRMS [ESI, (C<sub>15</sub>H<sub>24</sub>O<sub>3</sub>+Na)<sup>+</sup>] Calcd: 275.1623, Found:  $m/z$  275.1632.

### 3-[1-((Tetrahydro-2H-pyran-2-yl)oxy)cyclooctyl]prop-2-yn-1-ol

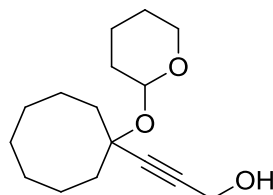

Viscous oil, yield 4.7 g (81%),  $R_f = 0.56$  (1:4, EtOAc/hexanes).  $^1\text{H NMR}$  (500 MHz,  $\text{CDCl}_3$ )  $\delta$  5.08 (dd,  $J = 5.2, 3.6$  Hz, 1H), 4.30 (d,  $J = 6.0$  Hz, 2H), 3.97-3.93 (m, 1H), 3.52-3.48 (m, 1H), 2.11-2.04 (m, 1H), 1.99-1.96 (m, 2H), 1.91-1.85 (m, 1H), 1.84-1.80 (m, 2H), and 1.73-1.26 (m, 14H).  $^{13}\text{C NMR}$  (126 MHz,  $\text{CDCl}_3$ )  $\delta$  95.4, 88.2, 83.3, 77.8, 63.3, 51.3, 36.5, 35.9, 32.3, 28.4, 28.0, 25.6, 24.7, 22.1, 21.9, and 20.4. IR (neat)  $\nu = 3319, 3261, 2357, 1105, 1066$   $\text{cm}^{-1}$ . HRMS [ESI,  $(\text{C}_{16}\text{H}_{26}\text{O}_3 + \text{Na})^+$ ] Calcd: 289.1780, Found:  $m/z$  289.1788.

### 4-Methyl-4-[(tetrahydro-2H-pyran-2-yl)oxy]pent-2-yn-1-ol<sup>[13]</sup>

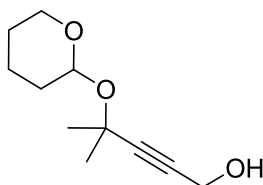

Clear oil, yield 2.9 g (78%),  $R_f = 0.41$  (1:4, EtOAc/hexanes).  $^1\text{H NMR}$  ( $\text{CDCl}_3$ , 500 MHz)  $\delta$  5.04-5.06 (m, 1H), 4.25 (d,  $J = 6.0$  Hz, 2H), 3.91-3.95 (m, 1H), 3.46-3.52 (m, 1H), 3.26 (t,  $J = 6.0$  Hz, 1H), 1.45-1.85 (m, 12H).

### 3-Cyclopentylideneprop-2-en-1-ol<sup>[15]</sup>

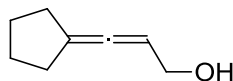

To a well-dried 250 mL two-neck round bottom flask with rubber septum and reflux condenser having a argon balloon atop, 100 mL dry diethyl ether was added *via* syringe. The contents were cooled to 0 °C under an inert atmosphere, and LiAlH<sub>4</sub> (1.7 g, 44.6 mmol) was added by opening the septum under a slow flow of argon. The septum was closed, and the contents of the round bottom flask were stirred for 5 min under argon. To this slurry, a solution of 3-[1-((tetrahydro-2*H*-pyran-2-yl)oxy)cyclopentyl]prop-2-yn-1-ol (5.0 g, 22.29 mmol) in 10 mL dry diethyl ether was slowly added *via* syringe. The reaction mixture was allowed to reach RT, and then stirred for 2 h. After 2 h, the mixture was cooled to 0 °C, and the excess LAH was quenched with 5.0 mL 5.0 M NaOH. The reaction mixture was then stirred for 30 min at RT. After 30 min, it was diluted with 100 mL diethyl ether, and then filtered through Celite. The organic layer was dried over anhydrous sodium sulfate. Solvent was evacuated *via* rotary evaporation to obtain pure compound as a transparent oil. Yield 2.11 g (76%), *R*<sub>f</sub> = 0.30 (1:4, EtOAc/hexanes). <sup>1</sup>H NMR (400 MHz, CDCl<sub>3</sub>) δ 5.33-5.26 (m, 1H), 4.08 (d, *J* = 5.2 Hz, 2H), 2.40-2.36 (m, 4H), 1.71-1.65 (m, 4H), and 1.55 (br., s, 1H, OH). <sup>13</sup>C NMR (151 MHz, CD<sub>2</sub>Cl<sub>2</sub>): 196.4, 107.1, 92.7, 61.3, 31.7, and 27.4.

### 3-Cyclohexylideneprop-2-en-1-ol<sup>[14]</sup>

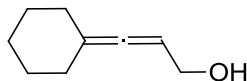

Transparent oil, yield 2.8 g (85%), *R*<sub>f</sub> = 0.33 (1:4, EtOAc/hexanes). <sup>1</sup>H NMR (400 MHz, CDCl<sub>3</sub>) δ 5.23-5.19 (m, 1H), 4.07 (t, *J* = 5.6 Hz, 2H), 2.15-2.12 (m, 4H), and 1.63-1.51 (m, 6H).

### 3-Cyclooctylideneprop-2-en-1-ol

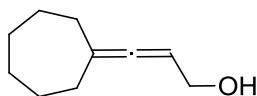

Transparent oil, yield 3.1 g (70%),  $R_f = 0.35$  (1:4, EtOAc/hexanes).  $^1\text{H}$  NMR (600 MHz,  $\text{CDCl}_3$ )  $\delta$  5.19-5.17 (m, 1H), 4.05 (t,  $J = 6.0$  Hz, 2H), 2.29-2.21 (m, 4H), and 1.62-1.57 (m, 4H), 1.56-1.52 (m, 4H).  $^{13}\text{C}$  NMR (151 MHz,  $\text{CDCl}_3$ )  $\delta$  200.6, 108.2, 89.7, 61.2, 32.6, 29.5, and 28.6. HRMS [ESI,  $(\text{C}_{10}\text{H}_{16}\text{O}+\text{Na})^+$ ] Calcd: 175.1099, Found:  $m/z$  175.1091.

### 3-Cyclooctylideneprop-2-en-1-ol

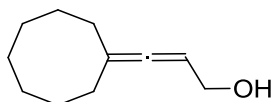

Transparent oil, yield 2.9 g (78%),  $R_f = 0.36$  (1:4, EtOAc/hexanes).  $^1\text{H}$  NMR (500 MHz,  $\text{CDCl}_3$ )  $\delta$  5.24-5.20 (m, 1H), 4.09 (t,  $J = 5.5$  Hz, 2H), 2.22-2.15 (m, 4H), and 1.70-1.56 (m, 6H), 1.55-1.52 (m, 4H).  $^{13}\text{C}$  NMR (126 MHz,  $\text{CDCl}_3$ )  $\delta$  201.1, 107.9, 90.3, 61.2, 31.8, 27.1, 26.9, and 26.3. HRMS [ESI,  $(\text{C}_{11}\text{H}_{18}\text{O}+\text{Na})^+$ ] Calcd: 189.1255, Found:  $m/z$  189.1251.

### 3-Cyclopentylideneallyl benzoate

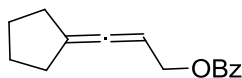

This compound was prepared by a modified literature procedure. Under an argon atmosphere, a solution of 3-cyclopentylideneprop-2-en-1-ol (2.0 g, 16.10 mmol) in 30.0 mL dry  $\text{CH}_2\text{Cl}_2$  was transferred into oven dried two-neck round bottom flask. The reaction mixture was cooled to 0 °C, and pyridine (2.73 mL, 33.8 mmol) and a catalytic amount of DMAP were added. The reaction mixture was stirred at 0 °C for 5 min. followed by slow syringe addition of freshly distilled dry benzoyl chloride (1.46 mL, 16.9 mmol). After the addition the reaction mixture was warmed to RT and stirred for an additional 3-4 h. After complete consumption of starting material as monitored by TLC,  $\text{CH}_2\text{Cl}_2$  was evaporated under reduced pressure to obtain the crude product as a light yellow oil. The material was



dissolved in 50.0 mL diethyl ether and then sequentially washed with 0.5 N cold HCl (50 mL), aqueous NaHCO<sub>3</sub>, and brine. The organic layer was separated and dried over anhydrous MgSO<sub>4</sub>. Solvent was evaporated under reduced pressure to obtain crude product as an oil which was purified by flash column chromatography using silica gel and ether/hexanes as eluent (1:15) to obtain pure product as a transparent oil. *Caution:* All allenyl benzoates are unstable on silica gel, and therefore, purification should be achieved with minimal silica and done very quickly to minimize decomposition. Transparent oil, yield 3.20 g (89%), *R<sub>f</sub>* = 0.41 (1:15, Et<sub>2</sub>O/hexanes). <sup>1</sup>H NMR (500 MHz, CDCl<sub>3</sub>) δ 8.08-8.05 (m, 2H), 7.57-7.53 (m, 1H), 7.35 (m, 2H), 5.35- 5.28 (m, 1H), 4.79 (d, *J* = 6.8 Hz, 2H), 2.40-2.36 (m, 4H), and 1.67-1.61 (m, 4H). <sup>13</sup>C NMR (101 MHz, CDCl<sub>3</sub>) δ 198.8, 166.5, 133.0, 130.1, 129.7, 128.4, 106.1, 87.4, 63.8, 31.3, and 27.1. HRMS [ESI, (C<sub>15</sub>H<sub>16</sub>O<sub>2</sub>+H)<sup>+</sup>] Calcd: 229.1228, Found: *m/z* 229.1225.

### 3-Cyclohexylideneallyl benzoate<sup>[14]</sup>

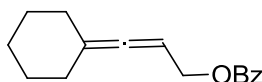

Transparent oil, yield 2.5 g (89%), *R<sub>f</sub>* = 0.40 (1:15, ether/hexanes). <sup>1</sup>H NMR (400 MHz, CDCl<sub>3</sub>) δ 8.08- 8.06 (m, 2H), 7.58-7.53 (m, 1H), 7.44 (t, *J* = 8.0 Hz, 2H), 5.25-5.21 (m, 1H), 4.78 (d, *J* = 6.4 Hz, 2H), 2.14-2.11 (m, 4H), 1.62-1.45 (m, 6H). <sup>13</sup>C NMR (101 MHz, CDCl<sub>3</sub>) δ 200.0, 166.5, 133.0, 13.6, 129.8, 128.4, 104.9, 104.8, 84.8, 64.0, 31.2, 27.3, 26.1. HRMS [ESI, (C<sub>16</sub>H<sub>18</sub>O<sub>2</sub>+H)<sup>+</sup>] Calcd: 243.1385, Found: *m/z* 243.1381.

### 3-Cycloheptylideneallyl benzoate

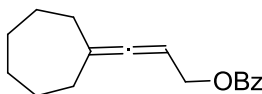

Transparent oil, yield 3.35 g (85%),  $R_f = 0.44$  (1:15, Et<sub>2</sub>O/hexanes). <sup>1</sup>H NMR (500 MHz, CDCl<sub>3</sub>) δ 8.08-8.06 (m, 2H), 7.57-7.53 (m, 1H), 7.43 (dt,  $J = 8.0, 1.6$  Hz, 2H), 5.23-5.19 (m, 1H), 4.77 (d,  $J = 6.5$  Hz, 2H), 2.29-2.23 (m, 4H), 1.64-1.58 (m, 4H), and 1.54-1.49 (m, 4). <sup>13</sup>C NMR (126 MHz, CDCl<sub>3</sub>) δ 203.3, 166.5, 132.9, 130.6, 129.8, 128.4, 106.9, 84.7, 63.9, 32.3, 29.4, and 28.5. HRMS [ESI, (C<sub>17</sub>H<sub>20</sub>O<sub>2</sub>+H)<sup>+</sup>] Calcd: 257.1541, Found:  $m/z$  257.1547.

### 3-Cyclooctylideneallyl benzoate

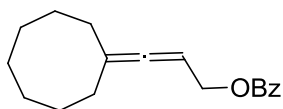

Transparent oil, yield 4.50 g (89%),  $R_f = 0.46$  (1:15, Et<sub>2</sub>O/hexanes). <sup>1</sup>H NMR (500 MHz, CDCl<sub>3</sub>) δ 8.08-8.05 (m, 2H), 7.57-7.53 (m, 1H), 7.45 (dt,  $J = 8.0, 1.6$  Hz, 2H), 5.27-5.24 (m, 1H), 4.78 (d,  $J = 6.5$  Hz, 2H), 2.29-2.14 (m, 4H), and 1.68-1.48 (m, 10H). <sup>13</sup>C NMR (126 MHz, CDCl<sub>3</sub>) δ 203.7, 166.6, 133.0, 130.6, 129.8, 128.4, 106.9, 85.3, 63.7, 31.5, 26.9, 26.8, and 26.2. HRMS [ESI, (C<sub>18</sub>H<sub>23</sub>O<sub>2</sub>+H)<sup>+</sup>] Calcd: 271.1698, Found:  $m/z$  271.1701.

### 4-Methylpenta-2,3-dien-1-yl-benzoate<sup>[16]</sup>

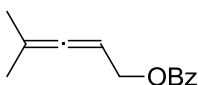

Transparent oil, yield 5.2 g (84%). <sup>1</sup>H NMR (500 MHz, CDCl<sub>3</sub>) δ 8.07-8.05 (m, 2H), 7.57-7.53 (m, 1H), 7.45-7.42 (m, 2H), 5.24-5.21 (m, 1H), 7.77 (d,  $J = 6.5$  Hz, 2H), 1.71 (s, 3H), 1.70 and (s, 3H). <sup>13</sup>C NMR (126 MHz, CDCl<sub>3</sub>) δ 203.4, 166.5, 132.9, 130.6, 129.7, 128.4, 97.6, 85.0, 63.8, and 20.3.

### Buta-2,3-dien-1-yl benzoate<sup>[17]</sup>

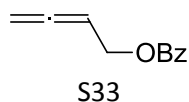

Transparent oil, yield 0.89 g (77%).  $^1\text{H}$  NMR (500 MHz,  $\text{CDCl}_3$ )  $\delta$  8.07-8.05 (m, 2H), 7.58-7.54 (m, 1H), 7.45-7.42 (m, 2H), 5.42 (quin,  $J = 7.0$  Hz, 1H), 4.90-4.87 (m, 2H), and 4.84-4.82 (m, 2H).  $^{13}\text{C}$  NMR (126 MHz,  $\text{CDCl}_3$ )  $\delta$  210.0, 166.5, 133.1, 130.3, 129.8, 128.5, 86.6, 76.9, and 62.8. HRMS [ESI,  $(\text{C}_{11}\text{H}_{10}\text{O}_2+\text{H})^+$ ] Calcd: 175.0759, Found:  $m/z$  175.0760.

### Methyl-5-cyclohexylidene-2,2-diphenylpent-4-enoate<sup>[18]</sup>

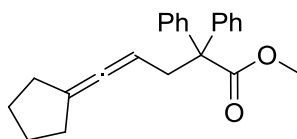

Under an inert and dry atmosphere, a solution of methyldiphenyl acetate (3.20 g, 14.14 mmol) in 60.0 mL dry THF was added to an oven dried 100 mL two-neck round bottom flask. The mixture was cooled to  $-78$  °C and lithium hexamethyldisilazide (2.60 g, 15.55 mmol) was added under a flow of dry argon. The reaction mixture was allowed to stir for 2 h at  $-78$  °C under argon. Appearance of a yellow coloration indicates the lithiation process. In another oven dried 250 mL two neck round bottom flask under argon, a solution of 3-cyclopentylideneallyl benzoate (3.23 g, 14.14 mmol) in dry 50 mL dry THF was added *via* syringe followed by addition of tetrakis-(triphenylphosphine)palladium (0.41 g, 0.354 mmol). The reaction mixture was stirred for 1 h, and then the lithiated solution of methyldiphenyl acetate was added *via* cannula. After the addition, the reaction mixture was stirred for 6 h at RT after which it was diluted with 50 mL diethyl ether, and sequentially washed with 0.5 N  $\text{NaHCO}_3$ , and water. The aqueous layer was extracted with an additional 50 mL diethyl ether. The combined organic layer was dried over anhydrous sodium sulfate, and the solvent was evaporated under reduced pressure to give crude product as a light yellow oil. This material was further purified by flash chromatography using silica gel and ether/hexanes as eluent (1:15, 1:9) to obtain pure compound as a transparent viscous oil,

yield 3.90 g (81%),  $R_f = 0.53$  (1:4, Et<sub>2</sub>O/hexanes). <sup>1</sup>H NMR (400 MHz, CDCl<sub>3</sub>) δ 7.34-7.23 (m, 10H), 7.87-7.79 (m, 1H), 3.70 (s, 3H), 3.10 (d,  $J = 7.2$  Hz, 2H), 2.15-2.11 (m, 4H), and 1.59-1.54 (m, 4H).

### Methyl 2,2-bis(4-chlorophenyl)-5-cyclopentylidenepent-4-enoate

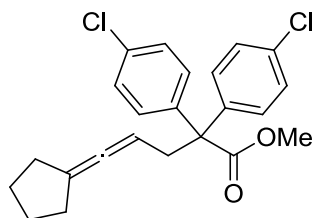

Viscous oil, yield 0.82 g (79%),  $R_f = 0.49$  (1:4, Et<sub>2</sub>O/hexanes). <sup>1</sup>H NMR (500 MHz, CDCl<sub>3</sub>) δ 7.27-7.25 (m, 4H), 7.19-7.18 (m, 4H), 4.79-4.75 (m, 1H), 3.69 (s, 3H), 3.03 (d,  $J = 7.5$  Hz, 2H), 2.18-2.09 (m, 4H), and 1.60-1.55 (m, 4H). <sup>13</sup>C NMR (126 MHz, CDCl<sub>3</sub>) δ 199.5, 173.8, 140.6, 132.9, 130.4, 128.0, 103.5, 86.4, 59.7, 52.6, 39.1, 30.8, and 26.9. HRMS [ESI, (C<sub>23</sub>H<sub>22</sub>Cl<sub>2</sub>O<sub>2</sub>+H)<sup>+</sup>] Calcd: 401.1075, Found:  $m/z$  401.1072.

### Methyl-9-(3-cyclopentylideneallyl)-9H-xanthene-9-carboxylate

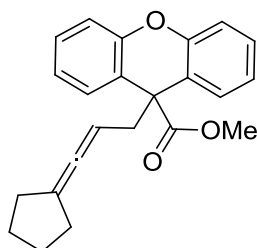

Viscous oil, yield 1.52 g (81%),  $R_f = 0.41$  (1:4, Et<sub>2</sub>O/hexanes). <sup>1</sup>H NMR (500 MHz, CDCl<sub>3</sub>) δ 7.25-7.18 (m, 4H), 7.08-7.03 (m, 4H), 4.61-4.55 (m, 1H), 3.60 (s, 3H), 3.00 (d,  $J = 7.5$  Hz, 2H), 1.91-1.86 (m, 2H), 1.70-1.65 (m, 2H), and 1.46-1.43 (m, 4H). <sup>13</sup>C NMR (126 MHz, CDCl<sub>3</sub>) δ 199.5, 174.3, 150.7, 128.5, 127.1, 123.1, 121.3, 116.5, 103.6, 85.1, 52.8, 50.1, 40.9, 30.6, and 26.8. HRMS [ESI, (C<sub>23</sub>H<sub>22</sub>O<sub>3</sub>+H)<sup>+</sup>] Calcd: 347.1647, Found:  $m/z$  347.1648.

### Ethyl-5-cyclohexylidene-2,2-diphenyl-4-enoate<sup>[18]</sup>

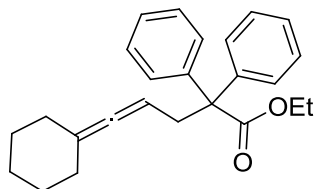

Transparent viscous oil (yield 1.23 g (80%),  $R_f = 0.49$  (1:4, Et<sub>2</sub>O/hexanes). <sup>1</sup>H NMR (500 MHz, CDCl<sub>3</sub>)  $\delta$  7.34-7.23 (m, 10H), 4.78-4.75 (m, 1H), 4.20 (q,  $J = 7.5$  Hz, 2H), 3.14 (d,  $J = 7.5$  Hz, 2H), 1.91-1.88 (m, 4H), 1.51-1.46 (m, 6H), and 1.20 (t,  $J = 7.5$  Hz, 3H).

### Methyl-9-(3-cyclohexylideneallyl)-9H-xanthane-9-carboxylate

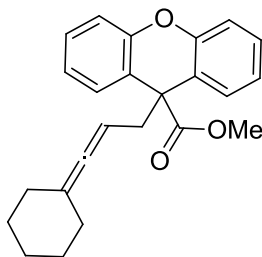

Viscous oil, yield 1.22 g (87%),  $R_f = 0.39$  (1:4, Et<sub>2</sub>O/hexanes). <sup>1</sup>H NMR (500 MHz, CDCl<sub>3</sub>)  $\delta$  7.26-7.23 (m, 2H), 7.18 (dd,  $J = 8.0, 2.0$  Hz, 2H), 7.09-7.04 (m, 4H), 4.44-4.40 (m, 1H), 3.62 (s, 3H), 2.98 (d,  $J = 7.5$  Hz, 2H), 1.64-1.56 (m, 4H), and 1.39-1.28 (m, 6H). <sup>13</sup>C NMR (126 MHz, CDCl<sub>3</sub>)  $\delta$  201.2, 174.5, 150.8, 128.6, 127.3, 123.2, 121.4, 116.7, 101.9, 82.5, 52.9, 50.5, 42.1, 31.0, 27.3, and 26.1. HRMS [ESI, (C<sub>24</sub>H<sub>24</sub>O<sub>3</sub>+H)<sup>+</sup>] Calcd: 361.1804, Found:  $m/z$  361.1809.

### Methyl-5-cyclohexylidene-2,2-bis(4-fluorophenyl)pent-4-enoate

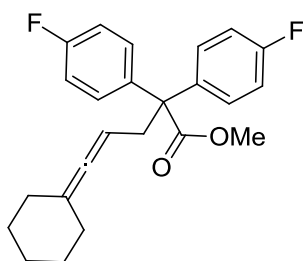

Viscous oil, yield 0.79 g (71%),  $R_f = 0.43$  (1:4, Et<sub>2</sub>O/hexanes). <sup>1</sup>H NMR (500 MHz, CDCl<sub>3</sub>)  $\delta$  7.27-7.21 (m, 4H), 7.05-6.95 (m, 4H), 4.69-4.65 (m, 1H), 3.69 (s, 3H), 3.03 (d,  $J = 7.0$  Hz, 2H), 1.89-1.87 (m, 4H), and 1.52-1.43 (m, 6H). <sup>13</sup>C NMR (126 MHz, CDCl<sub>3</sub>)  $\delta$  200.7, 174.4, 162.7, 138.3 (d,  $^3J_{(C,F)} = 3.5$  Hz), 130.8 (d,  $^2J_{(C,F)} = 7.9$  Hz), 114.7 (d,  $^1J_{(C,F)} = 21.3$  Hz), 102.2, 84.1, 59.6, 52.6, 39.8, 31.2, 27.4. and 26.2. HRMS [ESI, (C<sub>24</sub>H<sub>24</sub>F<sub>2</sub>O<sub>2</sub>+H)<sup>+</sup>] Calcd: 383.1823, Found:  $m/z$  383.1819.

#### Methyl-9-(3-cycloheptylideneallyl)-9H-xanthane-9-carboxylate

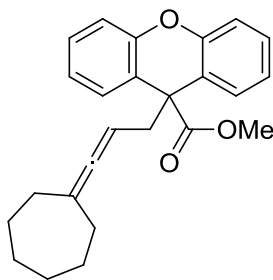

Viscous oil, yield 1.89 g (83%),  $R_f = 0.40$  (1:4, Et<sub>2</sub>O/hexanes). <sup>1</sup>H NMR (500 MHz, CDCl<sub>3</sub>)  $\delta$  7.25-7.22 (m, 2H), 7.17 (dd,  $J = 8.0, 1.5$  Hz, 2H), 7.08-7.03 (m, 4H), 4.42-4.37 (m, 1H), 3.62 (s, 3H), 2.95 (d,  $J = 7.5$  Hz, 2H), 1.77-1.66 (m, 4H), and 1.38-1.34 (m, 8H). <sup>13</sup>C NMR (126 MHz, CDCl<sub>3</sub>)  $\delta$  204.3, 174.5, 150.8, 128.6, 127.3, 123.3, 121.5, 116.7, 103.9, 82.3, 52.9, 50.5, 42.3, 32.0, 29.5, and 28.4. HRMS [ESI, (C<sub>25</sub>H<sub>26</sub>O<sub>3</sub>+H)<sup>+</sup>] Calcd: 375.1960, Found:  $m/z$  375.1952.

#### Methyl-5-cycloheptylidene-2,2-bis(4-methoxyphenyl)pent-4-enoate

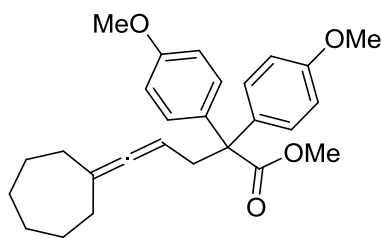

Viscous oil, yield 1.74 g (73%),  $R_f = 0.40$  (2:3, Et<sub>2</sub>O/hexanes). <sup>1</sup>H NMR (500 MHz, CDCl<sub>3</sub>)  $\delta$  7.21-7.14 (m, 4H), 6.82 (d,  $J = 9.0$  Hz, 4H), 4.70-4.67 (m, 1H), 3.79 (s, 6H), 3.68 (s, 3H), 3.02 (d,  $J = 7.5$  Hz, 2H), 2.15-2.01 (m, 4H), and 1.53-1.42 (m, 8H). <sup>13</sup>C NMR (126 MHz, CDCl<sub>3</sub>)  $\delta$  203.7, 175.0, 158.2, 134.8, 130.1, 130.0, 113.1, 103.7, 84.2, 59.2, 55.2, 52.3, 39.6, 33.0. and 29.3. HRMS [ESI, (C<sub>27</sub>H<sub>32</sub>O<sub>4</sub>+H)<sup>+</sup>] Calcd: 421.2379, Found:  $m/z$  421.2377.

#### Methyl-5-cycloheptylidene-2,2-bis(4-fluorophenyl)pent-4-enoate

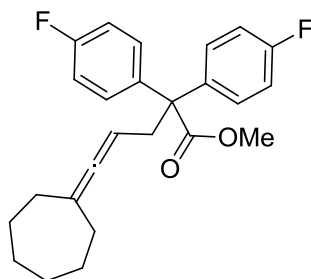

Viscous oil, yield 1.50 g (77%),  $R_f = 0.45$  (1:4, Et<sub>2</sub>O/hexanes). <sup>1</sup>H NMR (400 MHz, CDCl<sub>3</sub>)  $\delta$  7.26-7.21 (m, 4H), 7.03-6.96 (m, 4H), 4.68-4.64 (m, 1H), 3.70 (s, 3H), 3.03 (d,  $J = 7.2$  Hz, 2H), 2.02-2.00 (m, 4H), and 1.54-1.46 (m, 8H). <sup>19</sup>F NMR (376 MHz, CDCl<sub>3</sub>)  $\delta$  -115.9. <sup>13</sup>C NMR (126 MHz, CDCl<sub>3</sub>)  $\delta$  204.1, 174.4, 162.7, 160.8, 138.3 (d,  $^3J_{(C,F)} = 3.5$  Hz), 130.8 (d,  $^2J_{(C,F)} = 7.9$  Hz), 114.8 (d,  $^1J_{(C,F)} = 21.3$  Hz), 104.2, 83.8, 59.6, 52.7, 39.8, 32.2, 29.4. and 28.5. HRMS [ESI, (C<sub>25</sub>H<sub>26</sub>F<sub>2</sub>O<sub>2</sub>+H)<sup>+</sup>] Calcd: 397.1979, Found:  $m/z$  397.1987.

#### Ethyl-5-cyclooctylidene-2,2-diphenylpent-4-enoate

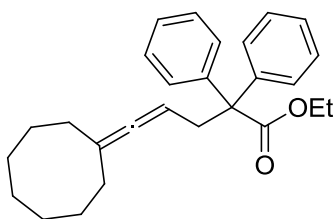

Viscous oil, yield 1.12 g (83%),  $R_f = 0.47$  (1:4, Et<sub>2</sub>O/hexanes). <sup>1</sup>H NMR (500 MHz, CDCl<sub>3</sub>) δ 7.33-7.21 (m, 10H), 4.79-4.75 (m, 1H), 4.17 (q,  $J = 9.0$  Hz, 2H), 3.09 (d,  $J = 7.5$  Hz, 2H), 1.90-1.85 (m, 4H), 1.54-1.42 (m, 10H), and 1.17 (t,  $J = 9.0$  Hz, 2H). <sup>13</sup>C NMR (126 MHz, CDCl<sub>3</sub>) δ 203.9, 174.2, 142.7, 129.3, 127.8, 126.8, 103.7, 85.0, 61.3, 60.7, 39.0, 31.7, 31.3, 26.9, 26.8, and 14.1. HRMS [ESI, (C<sub>27</sub>H<sub>32</sub>O<sub>2</sub>+H)<sup>+</sup>] Calcd: 389.2481, Found:  $m/z$  389.2489.

#### Methyl-2,2-bis(4-chlorophenyl)-5-cyclooctylidenepent-4-enoate

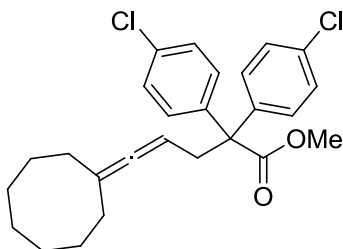

Viscous oil, yield 2.22 g (86%),  $R_f = 0.42$  (1:4, Et<sub>2</sub>O/hexanes). <sup>1</sup>H NMR (500 MHz, CDCl<sub>3</sub>) δ 7.27 (d,  $J = 9.0$  Hz, 4H), 7.19 (d,  $J = 9.0$  Hz, 4H), 4.72-4.69 (m, 1H), 3.70 (s, 3H), 3.02 (d,  $J = 7.5$  Hz, 2H), 1.92-1.89 (m, 4H), and 1.49-1.44 (m, 10H). <sup>13</sup>C NMR (126 MHz, CDCl<sub>3</sub>) δ 204.0, 173.8, 140.6, 133.0, 130.4, 128.0, 104.1, 84.1, 59.8, 52.6, 38.9, 31.2, 26.7, and 26.1. HRMS [ESI, (C<sub>26</sub>H<sub>28</sub>Cl<sub>2</sub>O<sub>2</sub>+H)<sup>+</sup>] Calcd: 443.1545, Found:  $m/z$  443.1539.

#### Methyl-2,2-bis(4-methoxyphenyl)-5-cyclooctylidenepent-4-enoate



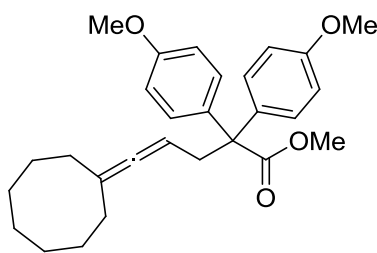

Viscous oil, yield 1.35 g (79%),  $R_f = 0.38$  (2:3, Et<sub>2</sub>O/hexanes). <sup>1</sup>H NMR (500 MHz, CDCl<sub>3</sub>)  $\delta$  7.20 (d,  $J = 9.0$  Hz, 4H), 6.82 (d,  $J = 9.0$  Hz, 4H), 4.76-4.72 (m, 1H), 3.80 (s, 6H), 3.69 (s, 3H), 3.03 (d,  $J = 7.5$  Hz, 2H), 1.95-1.92 (m, 4H), and 1.56-1.43 (m, 10H). <sup>13</sup>C NMR (126 MHz, CDCl<sub>3</sub>)  $\delta$  203.9, 175.2, 158.3, 134.9, 130.3, 113.2, 103.7, 85.1, 59.4, 55.4, 52.5, 39.3, 31.4, 26.9, and 26.3. HRMS [ESI, (C<sub>28</sub>H<sub>34</sub>O<sub>4</sub>+H)<sup>+</sup>] Calcd: 435.2535, Found:  $m/z$  435.2540.

#### Methyl-9-(3-cyclooctylideneallyl)-9H-xanthane-9-carboxylate

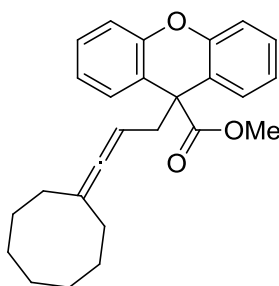

Viscous oil, yield 1.89 g (85%),  $R_f = 0.42$  (1:4, Et<sub>2</sub>O/hexanes). <sup>1</sup>H NMR (500 MHz, CDCl<sub>3</sub>)  $\delta$  7.23-7.23 (m, 2H), 7.16 (dd,  $J = 7.5, 1.5$  Hz, 2H), 7.09-7.03 (m, 4H), 4.44-4.40 (m, 1H), 3.63 (s, 3H), 2.94 (d,  $J = 7.5$  Hz, 2H), 1.70-1.66 (m, 4H), and 1.43-1.32 (m, 10H). <sup>13</sup>C NMR (126 MHz, CDCl<sub>3</sub>)  $\delta$  204.3, 174.5, 150.9, 128.7, 127.3, 123.4, 121.5, 116.7, 103.9, 83.0, 52.9, 50.6, 42.1, 31.2, 26.8, 26.7, and 26.1. HRMS [ESI, (C<sub>26</sub>H<sub>28</sub>O<sub>3</sub>+H)<sup>+</sup>] Calcd: 389.2117, Found:  $m/z$  389.2120.

#### 6-Ethyl 6-methyl-2,2-diphenylhepta-4,5-dienoate

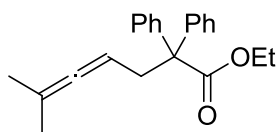

Viscous oil, yield 1.12 g (73%),  $R_f = 0.49$  (1:4, Et<sub>2</sub>O/hexanes). <sup>1</sup>H NMR (500 MHz, CDCl<sub>3</sub>) δ 7.31-7.22 (m, 10H), 4.76-4.70 (m, 1H), 4.18 (q,  $J = 7.0$  Hz, 2H), 3.09 (d,  $J = 7.5$  Hz, 2H), 1.48 (s, 3H), 1.47 (s, 3H), and 1.18 (t,  $J = 7.0$  Hz, 3H). <sup>13</sup>C NMR (126 MHz, CDCl<sub>3</sub>) δ 203.9, 174.1, 142.7, 129.3, 127.8, 126.8, 94.5, 84.8, 61.3, 60.6, 39.2, 20.2, and 14.1.

### Methyl 2,2-bis(4-chlorophenyl)-6-methylhepta-4,5-dienoate

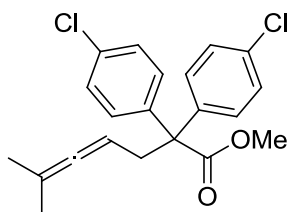

Viscous oil, yield 0.87 g (78 %),  $R_f = 0.49$  (1:4, Et<sub>2</sub>O/hexanes). <sup>1</sup>H NMR (500 MHz, CDCl<sub>3</sub>) δ 7.28-7.25 (m, 4H), 7.20-7.18 (m, 4H), 4.68-4.63 (m, 1H), 3.02 (d,  $J = 7.5$  Hz, 2H), 1.49 (s, 3H), and 1.48 (s, 3H). <sup>13</sup>C NMR (126 MHz, CDCl<sub>3</sub>) δ 203.9, 173.8, 140.6, 132.9, 130.4, 128.0, 94.9, 83.9, 59.6, 52.3, and 38.9, 20.1. HRMS [ESI, (C<sub>21</sub>H<sub>20</sub>Cl<sub>2</sub>O<sub>2</sub>+H)<sup>+</sup>] Calcd: 375.0919, Found:  $m/z$  375.0931.

### Methyl 6-methyl-2-phenylhepta-4,5-dienoate

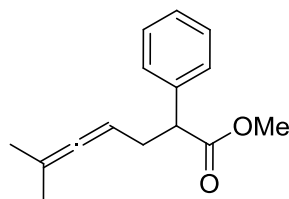

Viscous oil, yield 0.23 g (69%),  $R_f = 0.39$  (1:4, Et<sub>2</sub>O/hexanes). <sup>1</sup>H NMR (500 MHz, CDCl<sub>3</sub>) δ 7.31-7.23 (m, 5H), 4.96-4.92 (m, 1H), 3.68-3.64 (m, 1H), 3.65 (s, 3H), 2.78-2.71 (m, 1H), 2.41-2.37 (m, 1H), 1.60 (s, 3H), and 1.58 (s, 3H). <sup>13</sup>C NMR (126 MHz, CDCl<sub>3</sub>) δ 202.3, 174.0, 138.7, 128.6, 128.0, 127.2,

96.6, 86.3, 52.0, 51.2, 32.9, 20.6, and 20.5. HRMS [ESI, (C<sub>215</sub>H<sub>18</sub>O<sub>2</sub>+H)<sup>+</sup>] Calcd: 231.1385, Found: *m/z* 231.1389.

**Methyl 2,2-diphenylhexa-4,5-dienoate**<sup>[14, 18]</sup>

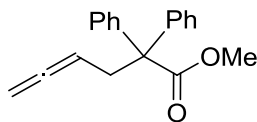

This compound was prepared according to the literature,<sup>[18]</sup> and analytical data was in agreement.

**5-Cyclopentylidene-2,2-diphenylpent-4-enoic acid**<sup>[18]</sup>

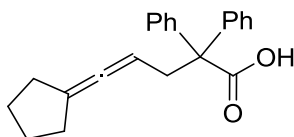

Into a 100 mL two neck round bottom flask fitted with a reflux condenser, methyl-5-cyclohexylidene-2,2-diphenylpent-4-enoate (1.5 g, 4.51 mmol) was dissolved in 10 mL ethanol. KOH (1.26 g, 22.55 mmol) was added to the reaction mixture followed by addition of 0.2 mL water. The mixture was refluxed for 6 h after which it was cooled to RT and diluted with 20 mL water and 50 mL hexanes. The aqueous layer was separated and washed twice with 10 mL hexanes. It was then neutralized with 0.5 N HCl to obtain a turbid mixture containing the desired compound. The aqueous layer was extracted twice with CH<sub>2</sub>Cl<sub>2</sub> (15 mL). The organic layer was separated, dried over anhydrous sodium sulfate and the solvent evaporated under reduced pressure to obtain a moderately pure product as an off white solid. Pure product was obtained by flash chromatography over silica gel and ether/hexanes as eluent (1:3). White crystalline solid (mp = 162-163 °C), yield 1.35 g (94%), *R<sub>f</sub>* = 0.38 (1:4, EtOAc/hexanes). <sup>1</sup>H NMR (400 MHz, CDCl<sub>3</sub>) δ 11.2 (br. s, 1H, COOH), 7.32-7.21 (m, 10H), 4.72-4.67 (m, 1H), 3.07 (d, *J* = 7.6 Hz, 2H), 1.85-1.83 (m, 4H), and 1.44-1.40 (m, 4H). <sup>13</sup>C NMR (101 MHz,

CDCl<sub>3</sub>)  $\delta$  200.8, 179.4, 142.1, 129.3, 128.0, 127.1, 102.1, 84.2, 60.5, 39.4, 31.1, 27.4, and 26.2. IR (neat)  $\nu$  3052 (br), 2971 (m), 2952 (m), 2851 (w), 1964 (w), 1695 (s), 1491 (m) cm<sup>-1</sup>.

### 2,2-Bis(4-chlorophenyl)-5-cyclopentylidene-pent-4-enoic acid

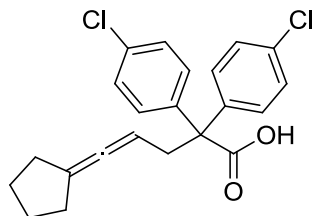

White crystalline solid (mp = 126-127 °C), yield 0.81 g (89%),  $R_f$  = 0.53 (1:4, EtOAc/hexanes). <sup>1</sup>H NMR (500 MHz, CDCl<sub>3</sub>)  $\delta$  11.1 (br. s, 1H, COOH), 7.29-7.19 (m, 8H), 4.79-4.73 (m, 1H), 3.00 (d,  $J$  = 7.2 Hz, 2H), 2.14-2.05 (m, 4H), and 1.57-1.51 (m, 4H). <sup>13</sup>C NMR (126 MHz, CDCl<sub>3</sub>)  $\delta$  199.8, 178.7, 140.2, 133.4, 130.6, 128.3, 103.9, 86.3, 59.7, 39.1, 30.9, and 27.0. IR (neat)  $\nu$  3060 (br), 2917 (m), 2853 (w), 1962 (w), 1691 (s), 1491 (s) cm<sup>-1</sup>. HRMS [ESI, (C<sub>22</sub>H<sub>20</sub>Cl<sub>2</sub>O<sub>2</sub>+Na)+] Calcd: 409.0738, Found:  $m/z$  409.0738.

### 9-(3-Cyclopentylideneallyl)-9H-xanthene-9-carboxylic acid

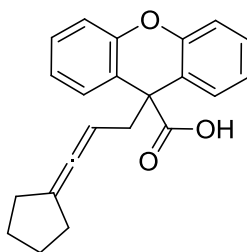

White solid (mp = 62-63 °C), yield 0.48 g (78%),  $R_f$  = 0.51 (1:4, EtOAc/hexanes). <sup>1</sup>H NMR (500 MHz, CDCl<sub>3</sub>)  $\delta$  10.8 (br. s, 1H, COOH), 7.27-7.21 (m, 4H), 7.07-7.03 (m, 4H), 4.61-4.54 (m, 1H), 2.99 (d,  $J$  = 6.8 Hz, 2H), 1.88-1.82 (m, 2H), 1.63-1.57 (m, 2H), and 1.45-1.40 (m, 4H). <sup>13</sup>C NMR (126 MHz, CDCl<sub>3</sub>)  $\delta$  199.8, 178.5, 150.9, 129.0, 127.4, 123.3, 120.7, 116.8, 104.1, 85.2, 49.9, 39.5, 30.7, and 26.9.

IR (neat)  $\nu$  3053 (br), 2970 (m), 2921 (m), 2866 (w), 1961 (w), 1901 (w) 1696 (s), 1480 (m)  $\text{cm}^{-1}$ .

HRMS [ESI,  $(\text{C}_{22}\text{H}_{20}\text{O}_3+\text{Na})^+$ ] Calcd: 355.1310, Found:  $m/z$  355.1317.

### 5-Cyclohexylidene-2,2-diphenylpent-4-enoic acid<sup>[18]</sup>

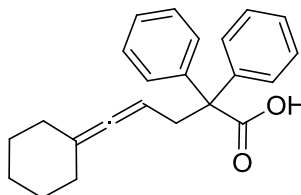

White crystalline solid (mp = 162-163 °C, reported 156-160 °C), yield 0.82 g (97%),  $R_f$  = 0.35 (1:4, EtOAc/hexanes).  $^1\text{H}$  NMR (400 MHz,  $\text{CDCl}_3$ )  $\delta$  11.2 (br. s, 1H, COOH), 7.32-7.21 (m, 10H), 4.72-4.67 (m, 1H), 3.07 (d,  $J$  = 7.6 Hz, 2H), 1.85-1.83 (m, 4H), and 1.44-1.40 (m, 4H).

### 2,2-bis(4-Fluorophenyl)-5-cyclohexylidenepent-4-enoic acid

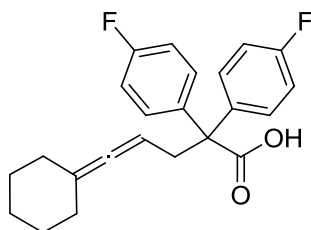

White solid (mp = 135-136 °C), yield 0.33 g (89%),  $R_f$  = 0.50 (1:4, EtOAc/hexanes).  $^1\text{H}$  NMR (500 MHz,  $\text{CDCl}_3$ )  $\delta$  10.6 (br. s, 1H, COOH), 7.29-7.25 (m, 4H), 7.01-6.96 (m, 4H), 4.69-4.66 (m, 1H), 3.03 (d,  $J$  = 7.5 Hz, 2H), 1.90-1.85 (m, 4H), and 1.49-1.43 (m, 6H).  $^{13}\text{C}$  NMR (126 MHz,  $\text{CDCl}_3$ )  $\delta$  200.9, 179.7, 162.0 (d,  $^1J_{\text{C,F}}$  = 248 Hz), 137.7 (d,  $^4J_{\text{C,F}}$  = 3.2 Hz), 130.9 (d,  $^3J_{\text{C,F}}$  = 7.8 Hz), 114.9 (d,  $^2J_{\text{C,F}}$  = 21.2 Hz), 102.4, 83.8, 59.5, 39.6, 31.1, 27.3, 26.1. IR (neat)  $\nu$  = 3057 (br), 2973 (m), 2922 (m), 2867 (w), 1962 (w), 1901 (w) 1696 (s), 1482 (m)  $\text{cm}^{-1}$ . HRMS [ESI,  $(\text{C}_{23}\text{H}_{22}\text{F}_2\text{O}_2+\text{Na})^+$ ] Calcd: 391.1486, Found:  $m/z$  391.1480.

### 9-(3-Cyclohexylideneallyl)-9H-xanthene-9-carboxylic acid

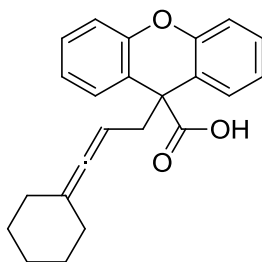

White solid (mp = 64-65 °C), yield 0.4 g (88%),  $R_f = 0.51$  (1:4, EtOAc/hexanes).  $^1\text{H}$  NMR (500 MHz,  $\text{CDCl}_3$ )  $\delta$  11.2 (br. s, 1H, COOH), 7.29-7.26 (m, 4H), 7.09-7.06 (m, 4H), 4.44-4.31 (m, 1H), 2.99 (d,  $J = 7.5$  Hz, 2H), 1.61-1.57 (m, 4H), and 1.36-1.31 (m, 6H).  $^{13}\text{C}$  NMR (126 MHz,  $\text{CDCl}_3$ )  $\delta$  201.2, 179.0, 150.9, 128.9, 127.5, 123.3, 120.6, 116.8, 102.2, 82.4, 50.1, 40.6, 31.0, 27.2, and 26.1. IR (neat)  $\nu$  3056 (br), 2972(m), 2918 (m), 2864 (w), 1963 (w), 1903(w) 1698 (s), 1482 (m)  $\text{cm}^{-1}$ . HRMS [ESI,  $(\text{C}_{23}\text{H}_{22}\text{O}_3+\text{Na})^+$ ] Calcd: 369.1467, Found:  $m/z$  369.1469.

### 2,2-bis(4-Fluorophenyl)-5-cycloheptylienenpent-4-enoic acid

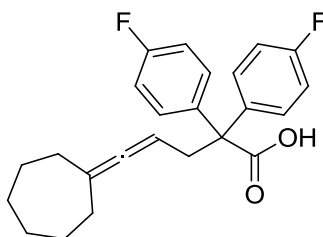

White solid (mp = 142-143 °C), yield 0.66 g (93%),  $R_f = 0.48$  (1:4, EtOAc/hexanes).  $^1\text{H}$  NMR (500 MHz,  $\text{CDCl}_3$ )  $\delta$  11.5 (br. s, 1H, COOH), 7.29-7.26 (m, 4H), 7.01-6.97 (m, 4H), 4.69-4.66 (m, 1H), 3.02 (d,  $J = 7.5$  Hz, 2H), 1.99-1.93 (m, 4H), and 1.47-1.44 (m, 8H).  $^{13}\text{C}$  NMR (126 MHz,  $\text{CDCl}_3$ )  $\delta$  204.2, 179.9, 162.9 (d,  $^1J_{\text{C,F}} = 247$  Hz), 137.7 (d,  $^4J_{\text{C,F}} = 3.6$  Hz), 130.9 (d,  $^3J_{\text{C,F}} = 7.9$  Hz), 115.0 (d,  $^2J_{\text{C,F}} = 21.8$  Hz), 104.4, 83.6, 59.6, 39.6, 32.1, 29.4, and 28.4. IR (neat)  $\nu = 3061$  (br), 2977 (m), 2920 (m), 2866 (w), 1968 (w), 1900 (w) 1699 (s), 1483 (m)  $\text{cm}^{-1}$ . HRMS [ESI,  $(\text{C}_{24}\text{H}_{24}\text{F}_2\text{O}_2+\text{Na})^+$ ] Calcd: 405.1642, Found:  $m/z$  405.1650.

### 2,2-bis(4-Methoxyphenyl)-5-cycloheptyliene-pent-4-enoic acid

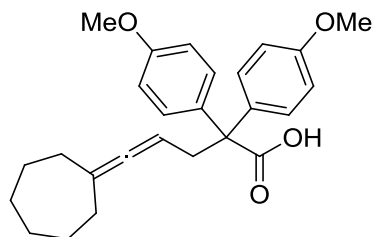

White solid (mp = 118-119 °C), yield 0.24 g (89%),  $R_f = 0.47$  (3:4, EtOAc/hexanes).  $^1\text{H}$  NMR (500 MHz,  $\text{CDCl}_3$ )  $\delta$  11.2 (br. s, 1H, COOH), 7.23 (d,  $J = 8.5$  Hz, 4H), 6.82 (d,  $J = 8.5$  Hz, 4H), 4.71-4.67 (m, 1H), 3.79 (s, 6H), 3.01 (d,  $J = 7.5$  Hz, 2H), 2.02-1.98 (m, 4H), and 1.51-1.42 (m, 8H).  $^{13}\text{C}$  NMR (126 MHz,  $\text{CDCl}_3$ )  $\delta$  204.0, 179.0, 158.5, 134.4, 130.4, 113.3, 103.9, 84.2, 59.2, 55.4, 39.6, 32.1, 29.4, and 28.5. IR (neat)  $\nu$  3058 (br), 2970(m), 2928 (m), 2864 (w), 1962 (w), 1903(w) 1697 (s), 1481 (m)  $\text{cm}^{-1}$ . HRMS [ESI,  $(\text{C}_{26}\text{H}_{30}\text{O}_4+\text{Na})^+$ ] Calcd: 429.2042, Found:  $m/z$  429.2040.

### 9-(3-Cycloheptylideneallyl)-9H-xanthene-9-carboxylic acid

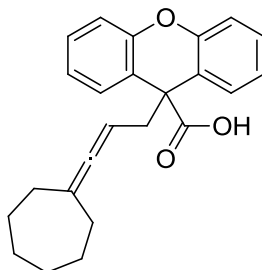

White solid ( $>90$  °C charring), yield 0.55 g (89%),  $R_f = 0.53$  (1:4, EtOAc/hexanes).  $^1\text{H}$  NMR (500 MHz,  $\text{CDCl}_3$ )  $\delta$  11.3 (br. s, 1H, COOH), 7.28-7.24 (m, 4H), 7.09-7.05 (m, 4H), 4.43-4.39 (m, 1H), 2.96 (d,  $J = 7.5$  Hz, 2H), 1.75-1.64 (m, 4H), and 1.42-1.34 (m, 8H).  $^{13}\text{C}$  NMR (126 MHz,  $\text{CDCl}_3$ )  $\delta$  204.3, 178.8, 150.9, 128.9, 127.5, 123.4, 120.6, 116.9, 104.2, 82.2, 50.2, 40.7, 32.0, 29.5, and 28.3. IR (neat)  $\nu$  3075 (w), 2920 (m), 2848 (m), 2627 (w), 1961 (w), 1698 (s), and 1574 (m)  $\text{cm}^{-1}$ . HRMS [ESI,  $(\text{C}_{24}\text{H}_{24}\text{O}_3+\text{Na})^+$ ] Calcd: 383.1623, Found:  $m/z$  383.1627.

### 5-Cyclooctylidene-2,2-diphenylpent-4-enoic acid

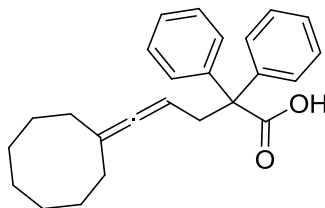

White solid (146-147 °C), yield 0.34 g (93%),  $R_f = 0.55$  (1:4, EtOAc/hexanes).  $^1\text{H}$  NMR (500 MHz,  $\text{CDCl}_3$ )  $\delta$  11.2 (br. s, 1H, COOH), 7.34-7.24 (m, 10H), 4.78-4.75 (m, 1H), 3.09 (d,  $J = 7.5$  Hz, 2H), 1.92-1.88 (m, 4H), and 1.52-1.43 (m, 10H).  $^{13}\text{C}$  NMR (126 MHz,  $\text{CDCl}_3$ )  $\delta$  204.1, 142.1, 129.4, 129.3, 128.0, 127.1, 103.9, 84.7, 60.2, 38.9, 31.3, 26.8, and 26.2. IR (neat)  $\nu = 3068$  (w), 2920 (m), 2846 (w), 2631 (w), 1692 (s), and 1599  $\text{cm}^{-1}$ . HRMS [ESI,  $(\text{C}_{25}\text{H}_{28}\text{O}_2+\text{Na})^+$ ] Calcd: 383.1987, Found:  $m/z$  383.1988.

### 2,2-bis(4-Chlorophenyl)-5-cyclooctylidene-4-enoic acid

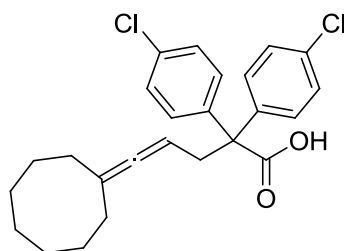

White solid (mp = 141-142.5 °C), yield 0.29 g (95%),  $R_f = 0.47$  (1:4, EtOAc/hexanes).  $^1\text{H}$  NMR (500 MHz,  $\text{CDCl}_3$ )  $\delta$  11.2 (br. s, 1H, COOH), 7.29-7.22 (m, 8H), 4.73-4.70 (m, 1H), 3.01 (d,  $J = 7.5$  Hz, 2H), 1.90-1.88 (m, 4H), and 1.48-1.42 (m, 10H).  $^{13}\text{C}$  NMR (126 MHz,  $\text{CDCl}_3$ )  $\delta$  204.3, 140.2, 133.4, 130.7, 130.7, 128.3, 128.3, 104.5, 84.0, 59.9, 38.9, 31.3, 26.8, and 26.2. IR (neat)  $\nu$  3059 (br), 2972 (m), 2924 (m), 2634 (w), 1960 (w), 1903(w) 1698 (s), 1480 (m)  $\text{cm}^{-1}$ . HRMS [ESI,  $(\text{C}_{25}\text{H}_{26}\text{Cl}_2\text{O}_2+\text{Na})^+$ ] Calcd: 451.1208, Found:  $m/z$  451.1209.



### 2,2-bis(4-Methoxyphenyl)-5-cyclooctylenepent-4-enoic acid

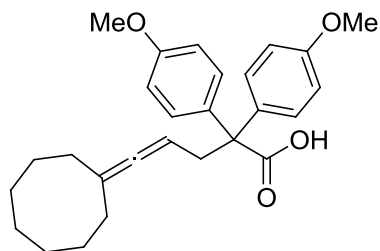

White solid (118-119 °C), yield 0.55 g (92%),  $R_f = 0.51$  (2:3, EtOAc/hexanes).  $^1\text{H}$  NMR (500 MHz,  $\text{CDCl}_3$ )  $\delta$  11.2 (br. s, 1H, COOH), 7.24 (d,  $J = 9.0$  Hz, 4H), 6.83 (d,  $J = 9.0$  Hz, 4H), 4.76-4.73 (m, 1H), 3.80 (s, 6H), 3.02 (d,  $J = 7.5$  Hz, 2H), 1.94-1.91 (m, 4H), and 1.51-1.44 (m, 10H).  $^{13}\text{C}$  NMR (126 MHz,  $\text{CDCl}_3$ )  $\delta$  203.9, 158.4, 134.2, 130.2, 130.1, 113.2, 103.7, 84.7, 59.1, 55.2, 38.9, 31.2, 26.7, 26.7, and 26.1. IR (neat)  $\nu$  3007 (w), 2921 (m), 2846 (m), 2637 (w), 1959 (w), 1690 (s), and 1608  $\text{cm}^{-1}$ . HRMS [ESI,  $(\text{C}_{27}\text{H}_{32}\text{O}_4 + \text{Na})^+$ ] Calcd: 443.2198, Found:  $m/z$  443.2192.

### 9-(3-Cycloheptylideneallyl)-9H-xanthene-9-carboxylic acid

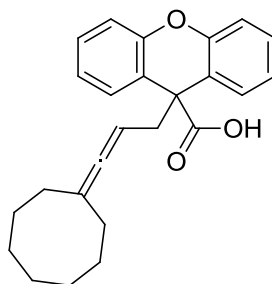

White solid (147-148 °C), yield 0.22 g (91%),  $R_f = 0.54$  (1:4, EtOAc/hexanes).  $^1\text{H}$  NMR (500 MHz,  $\text{CDCl}_3$ )  $\delta$  11.3 (br. s, 1H, COOH), 7.28-7.25 (m, 4H), 7.09-7.06 (m, 4H), 4.43-4.40 (m, 1H), 2.95 (d,  $J = 7.5$  Hz, 2H), 1.69-1.62 (m, 4H), and 1.43-1.31 (m, 10H).  $^{13}\text{C}$  NMR (126 MHz,  $\text{CDCl}_3$ )  $\delta$  204.4, 150.9, 129.0, 127.6, 123.4, 120.7, 116.9, 104.1, 82.9, 50.3, 40.8, 31.1, 26.8, 26.7 and 26.1. IR (neat)  $\nu$  3078 (w), 2918 (m), 2858 (m), 2631 (w), 1960 (w), 1695 (s), and 1605  $\text{cm}^{-1}$ . HRMS [ESI,  $(\text{C}_{25}\text{H}_{26}\text{O}_3 + \text{Na})^+$ ] Calcd: 397.1780, Found:  $m/z$  397.1788.

### 6-Methyl-2,2-diphenylhepta-4,5-dienoic acid

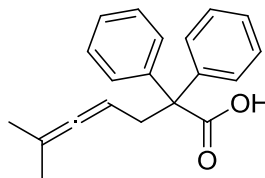

Analytical data is in agreement with literature data. <sup>[18]</sup>

### 6-Methylhepta-4,5-dienoic acid

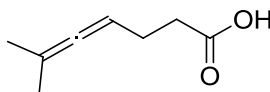

Analytical data is in agreement with literature. <sup>[10a]</sup>

### 2,2-bis(4-Chlorophenyl)-6-methylhepta-4,5-dienoic acid

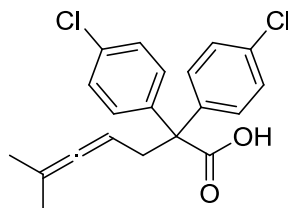

White solid (150-151 °C), yield 0.15 g (93%),  $R_f = 0.54$  (1:4, EtOAc/hexanes). <sup>1</sup>H NMR (500 MHz, CDCl<sub>3</sub>)  $\delta$  11.3 (br. s, 1H, COOH), 7.09-7.01 (m, 8H), 4.59 (m, 1H), 2.79 (d,  $J = 7.5$  Hz, 2H), 1.47 (s, 3H), and 1.46 (s, 3H). <sup>13</sup>C NMR (126 MHz, CDCl<sub>3</sub>)  $\delta$  203.8, 181.2, 141.2, 132.6, 130.6, 127.8, 94.7, 84.7, 60.4, 39.1, and 20.0. IR (neat)  $\nu$  3054 (br), 2977(m), 2908 (m), 2854 (w), 1961 (w), 1903(w) 1693 (s), 1482 (m) cm<sup>-1</sup>. HRMS [ESI, (C<sub>20</sub>H<sub>18</sub>Cl<sub>2</sub>O<sub>2</sub>+Na)<sup>+</sup>] Calcd: 383.0582, Found:  $m/z$  383.0588.

### 6-Methyl-2-phenylhepta-4,5-dienoic acid

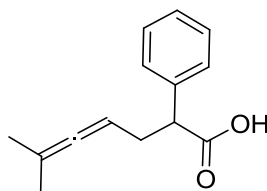

Viscous oil, yield 0.11 g (90%),  $R_f = 0.56$  (1:4, EtOAc/hexanes).  $^1\text{H NMR}$  (500 MHz,  $\text{CDCl}_3$ )  $\delta$  11.3 (br. s, 1H, COOH), 7.31-7.25 (m, 5H), 4.97-4.92 (m, 1H), 3.67 (dd,  $J = 9.0, 6.5$  Hz, 1H), 2.76-2.70 (m, 1H), 2.42-2.36 (m, 1H), 1.57 (d,  $J = 2.5$  Hz, 3H), and 1.53 (d,  $J = 2.5$  Hz, 3H).  $^{13}\text{C NMR}$  (126 MHz,  $\text{CDCl}_3$ )  $\delta$  202.3, 178.8, 138.2, 128.6, 128.0, 127.4, 96.9, 86.0, 50.9, 32.5, and 204. HRMS [ESI,  $(\text{C}_{14}\text{H}_{16}\text{O}_2 + \text{Na})^+$ ] Calcd: 239.1048, Found:  $m/z$  239.1050.

### 2,2-Diphenylhexa-4,5-dienoic acid<sup>[18]</sup>

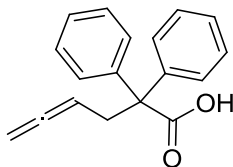

Analytical data are in agreement with literature data.

### (S)-5-5(2-Methylprop-1-en-1-yl)dihydrofuran-2(3H)-one<sup>[18]</sup>

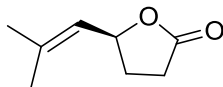

Viscous oil, yield (29.0 mg, 92%),  $R_f$  0.42 (1:1  $\text{Et}_2\text{O}$ /hexanes); 92%  $ee$ ,  $t_{R1} = 56.92$  min (minor),  $t_{R2} = 58.73$  min (major). Chiral HPLC conditions: Chiralcel OD-H, 0.5 mL/min, hexanes/*i*-PrOH 99:1.  $[\alpha]_D^{23} = +118.5$  ( $c = 0.3$ ,  $\text{CHCl}_3$ ).  $^1\text{H NMR}$  (400 MHz,  $\text{CDCl}_3$ )  $\delta$  5.24 (d,  $J = 8.4$  Hz, 1H), 5.21-5.16 (m, 1H), 2.58-2.48 (m, 2H), 2.40-2.32 (m, 1H), 1.98-1.88 (m, 1H), 1.77 (s, 3H), and 1.74 (s, 3H).

### (S)-3,3-Diphenyl-5-vinyldihydrofuran-2(3H)-one<sup>[19]</sup>

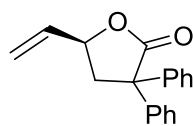

Viscous oil, yield (27.0 mg, 86%),  $R_f$  0.48 (2:3 Et<sub>2</sub>O/hexanes); 86% *ee*,  $t_{R1}$  = 7.36 min (major),  $t_{R2}$  = 8.90 min (minor). Chiral HPLC conditions: Chiralcel OD-H, 1.0 mL/min, hexanes/*i*-PrOH 100:5.  $[\alpha]_D^{23.2}$  = -83.4 ( $c$  = 0.5, CHCl<sub>3</sub>). <sup>1</sup>H NMR (500 MHz, CDCl<sub>3</sub>)  $\delta$  7.42-7.19 (m, 10H), 5.92 (ddd,  $J$  = 17.2, 10.4, 6.4 Hz, 1H), 5.42 (d,  $J$  = 17.0 Hz, 1H), 5.30 (d,  $J$  = 10.5 Hz, 1H), 4.79-4.76 (1 H, m), 3.10 (dd,  $J$  = 13.0, 5.0 Hz, 1H), and 2.76 (dd,  $J$  = 13.0, 10.5 Hz, 1H).

**(S)-5-(2-Methylprop-1-en-1-yl)-3,3-diphenyldihydrofuran-2(3H)-one<sup>[19]</sup>**

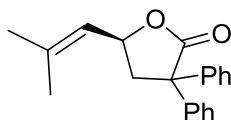

Viscous oil, yield (29.0 mg, 97%),  $R_f$  0.44 (2:3 Et<sub>2</sub>O/hexanes); 84% *ee*,  $t_{R1}$  = 24.36 min (minor),  $t_{R2}$  = 29.16 min (major). Chiral HPLC conditions: Chiralpack AD-H, 0.5 mL/min, hexanes/*i*-PrOH 100:5.  $[\alpha]_D^{23.1}$  = -88.9 ( $c$  = 0.5, THF). <sup>1</sup>H NMR (500 MHz, CDCl<sub>3</sub>)  $\delta$  7.43-7.22 (m, 10H), 5.28-5.26 (m, 1H), 5.04 (ddd,  $J$  = 10.6, 8.4, 4.8 Hz, 1H), 3.06 (dd,  $J$  = 13.0, 5.0 Hz, 1H), 2.69 (dd,  $J$  = 13.0, 10.5 Hz, 1H), 1.78 (d,  $J$  = 1.5 Hz, 3H), 1.68 (d,  $J$  = 1.5 Hz, 3H). <sup>13</sup>C NMR (101 MHz, CDCl<sub>3</sub>)  $\delta$  = 177.3, 142.3, 140.9, 139.9, 129.1, 128.5, 127.9, 127.8, 127.5, 127.3, 122.2, 74.1, 58.4, 44.4, 25.9, and 18.7.

**(S)-5-(Cyclopentylidenemethyl)-3,3-diphenyldihydrofuran-2(3H)-one<sup>[18]</sup>**

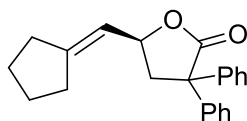

White solid (mp = 56-57 °C, reported<sup>7</sup> 52-55 °C), yield (26.0 mg, 89%),  $R_f$  0.46 (2:3, Et<sub>2</sub>O/hexanes); 89% *ee*,  $t_{R1}$  = 7.17 min (major),  $t_{R2}$  = 12.56 min (minor). Chiral HPLC conditions: Chiralpack AD-H,

1.0 mL/min, hexanes/*i*PrOH 100:5.  $[\alpha]_D^{22.3} = -63.3$  ( $c = 0.3$ , THF).  $^1\text{H NMR}$  (500 MHz,  $\text{CDCl}_3$ )  $\delta$  7.41-7.22 (m, 10H), 5.39-5.35 (m, 1H), 4.94 (ddd,  $J = 10.5, 8.6, 5.2$  Hz, 1H), 3.07 (dd,  $J = 13.0, 5.0$  Hz, 1H), 2.69 (dd,  $J = 13.0, 10.5$  Hz, 1H), 2.38-2.15 (m, 4H), 1.72-1.54 (m, 4H).  $^{13}\text{C NMR}$  (100 MHz,  $\text{CDCl}_3$ )  $\delta$  177.2, 152.5, 142.4, 139.9, 129.0, 128.4, 127.8, 127.8, 127.5, 127.2, 117.4, 75.7, 58.3, 44.2, 34.1, 29.3, 26.3, and 26.0.

**(*S*)-5-Cyclohexylidenemethyl)-3,3-diphenyldihydrofuran-2(3*H*)-one**

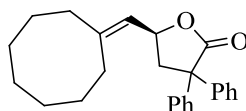

Viscous oil, yield (28.8 mg, 96%),  $R_f$  0.47 (2:3,  $\text{Et}_2\text{O}$ /hexanes); 79% *ee*,  $t_{R1} = 6.08$  min (minor),  $t_{R2} = 9.15$  min (major). Chiral HPLC conditions: Chiralcel OD-H, 1.0 mL/min, hexanes/*i*PrOH 100:5.  $[\alpha]_D^{23.8} = -62.2$  ( $c = 0.2$ ,  $\text{CHCl}_3$ ).  $^1\text{H NMR}$  (500 MHz,  $\text{CDCl}_3$ )  $\delta$  7.43-7.25 (m, 10H), 5.33 (d,  $J = 8.5$  Hz, 1H), 5.14-5.09 (m, 1H), 3.11 (dd,  $J = 13.5, 5.0$  Hz, 1H), 2.71 (dd,  $J = 13.5, 10.5$  Hz, 1H), 2.27-2.23 (m, 4H), 1.74-1.67 (m, 3H), and 1.57-1.49 (m, 7H).  $^{13}\text{C NMR}$  (126 MHz,  $\text{CD}_2\text{Cl}_2$ )  $\delta = 177.5, 151.2, 142.9, 140.3, 129.3, 128.6, 128.1, 128.1, 127.7, 127.5, 122.7, 74.3, 58.6, 44.5, 37.8, 29.8, 28.5, 27.6, 26.6, 26.4,$  and 26.2. IR (neat)  $\nu = 3059$  (w), 2922 (m), 2851 (m), 1978 (w), and 1760 (s)  $\text{cm}^{-1}$ . HRMS [ESI,  $(\text{C}_{25}\text{H}_{28}\text{O}_2 + \text{Na})^+$ ] Calcd: 383.1987, Found:  $m/z$  383.1989.

**(*S*)-5-(Cyclooctylidenemethyl)-3,3-diphenyldihydrofuran-2(3*H*)-one<sup>[18]</sup>**

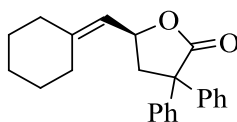

Yield (28.0 mg, 92%),  $R_f$  0.47 (2:3,  $\text{Et}_2\text{O}$ /hexanes); 86% *ee*,  $t_{R1} = 6.18$  min (major),  $t_{R2} = 12.27$  min (minor). Chiral HPLC conditions: Chiralcel OD-H, 1.0 mL/min, hexanes/*i*-PrOH 100:5.  $[\alpha]_D^{21.8} =$

-98.7 ( $c = 0.3$ , THF).  $^1\text{H}$  NMR (400 MHz,  $\text{CDCl}_3$ )  $\delta$  7.42-7.36 (m, 4H), 7.34-7.28 (m, 5H), 5.22 (d,  $J = 8.4$  Hz, 1H), 5.12-5.06 (m, 1H), 3.04 (dd,  $J = 12.0, 4.8$  Hz, 1H), 2.70 (dd,  $J = 13.2, 10.4$  Hz, 1H), 2.20-2.07 (m, 4H), 157.1, 153 (m, 6H).  $^{13}\text{C}$  NMR (101 MHz,  $\text{CDCl}_3$ )  $\delta$  177.4, 148.7, 142.3, 139.9, 129.1, 128.5, 127.9, 127.8, 127.5, 127.3, 118.9, 73.4, 58.4, 44.7, 37.1, 29.7, 28.3, 27.9, and 26.6.

**(S)-5-(Cyclohexylidenemethyl)-3,3-bis(4-fluorophenyl)dihydrofuran-2(3H)-one**

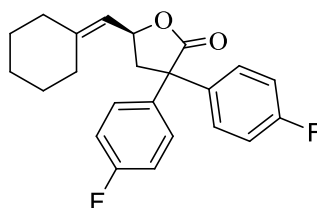

Viscous oil, yield (27 mg, 91%),  $R_f$  0.49 (2:3,  $\text{Et}_2\text{O}$ /hexanes); 81%  $ee$ ,  $t_{R1} = 12.00$  min (major),  $t_{R2} = 17.99$  min (minor). Chiral HPLC conditions: Chiralpack AD-H, 1.0 mL/min, hexanes/*i*-PrOH 100:5.  $[\alpha]_D^{20.9} = -76.8$  ( $c = 0.2$ ,  $\text{CHCl}_3$ ).  $^1\text{H}$  NMR (600 MHz,  $\text{CDCl}_3$ )  $\delta$  7.37-7.34 (m, 2H), 7.28-7.24 (m, 2H), 7.09-7.05 (m, 2H), 7.01-6.97 (m, 2H), 5.20 (d,  $J = 8.5$  Hz, 1H), 5.10-5.05 (m, 1H), 2.98 (dd,  $J = 13.0, 5.0$  Hz, 1H), 2.64 (dd,  $J = 13.0, 10.5$  Hz, 1H), 2.22-2.06 (m, 4H), and 1.58-1.50 (m, 6H).  $^{13}\text{C}$  NMR (126 MHz,  $\text{CDCl}_3$ )  $\delta$  177.1, 162.3 (d,  $^1J_{(C,F)} = 249$  Hz), 162.1 (d,  $^1J_{(C,F)} = 249$  Hz), 149.1, 137.9, 135.6, 129.5 (d,  $^3J_{(C,F)} = 8.3$  Hz), 129.2 (d,  $^3J_{(C,F)} = 8.3$  Hz), 118.6, 116.1 (d,  $^2J_{(C,F)} = 21.4$  Hz), 115.4 (d,  $^2J_{(C,F)} = 21.4$  Hz), 103.9, 57.3, 44.8, 37.1, 29.7, 28.3, 27.9, and 26.5. IR (neat)  $\nu$  3078 (w), 3039 (w), 2930 (m), 2854 (m), 1892 (w), 1759 (s), and 1605 (m)  $\text{cm}^{-1}$ . HRMS [ESI,  $(\text{C}_{25}\text{H}_{20}\text{O}_2+\text{Na})^+$ ] Calcd: 391.1486, Found:  $m/z$  391.1500.

**(S)-5-(Cycloheptylidenemethyl)-3,3-bis(4-fluorophenyl)dihydrofuran-2(3H)-one**

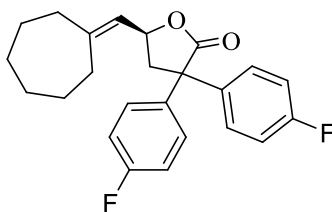

Viscous oil, yield (29 mg, 97%),  $R_f$  0.52 (2:3, Et<sub>2</sub>O/hexanes); 82% *ee*,  $t_{R1}$  = 11.80 min (minor),  $t_{R2}$  = 17.02 min (major). Chiral HPLC conditions: Chiralpack AD-H, 1.0 mL/min, hexanes/*i*PrOH 100:5.  $[\alpha]_D^{22.5} = -70.2$  ( $c = 0.3$ , CHCl<sub>3</sub>). <sup>1</sup>H NMR (600 MHz, CDCl<sub>3</sub>)  $\delta$  7.35 (dd,  $J = 9.0, 5.4$  Hz, 2H), 7.26 (dd,  $J = 9.0, 5.4$  Hz, 2H), 7.07 (dd,  $J = 9.0, 8.4$  Hz, 2H), 6.99 (dd,  $J = 9.0, 8.4$  Hz, 2H), 5.26 (d,  $J = 8.4$  Hz, 1H), 5.06-5.02 (m, 1H), 3.01 (dd,  $J = 13.2, 4.8$  Hz, 1H), 2.71 (dd,  $J = 13.2, 10.2$  Hz, 1H), 2.34-2.21 (m, 4H), and 1.63-1.47 (m, 6H). <sup>13</sup>C NMR (151 MHz, CDCl<sub>3</sub>)  $\delta$  177.1, 162.3 (d,  $^1J_{(C,F)} = 248$  Hz), 162.0 (d,  $^1J_{(C,F)} = 248$  Hz), 150.8, 138.0 (d,  $^4J_{(C,F)} = 3.3$  Hz), 135.6 (d,  $^4J_{(C,F)} = 3.3$  Hz), 129.5 (d,  $^3J_{(C,F)} = 8.3$  Hz), 129.2 (d,  $^3J_{(C,F)} = 8.3$  Hz), 121.9, 116.1 (d,  $^2J_{(C,F)} = 21.6$  Hz), 115.4 (d,  $^2J_{(C,F)} = 21.6$  Hz), 73.9, 57.3, 44.6, 37.9, 30.6, 29.7, 29.1, 28.7, and 27.3. IR (neat)  $\nu = 3084$  (w), 3052 (w), 2929 (m), 2851 (m), 1882 (w), 1749 (s), and 1605 (m) cm<sup>-1</sup>. HRMS [ESI, (C<sub>24</sub>H<sub>24</sub>F<sub>2</sub>O<sub>2</sub>)<sup>+</sup>] Calcd: 382.1744, Found:  $m/z$  382.1752.

**(S)-5-(Cyclopentylidenemethyl)-4,5-dihydro-2H-spiro[furan-3,9'-xanthen]-2'-one**

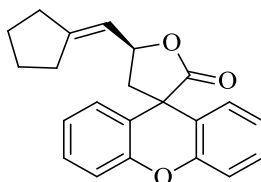

White solid (mp = 150-151 °C), yield 28 mg (97%),  $R_f = 0.42$  (2:3, Et<sub>2</sub>O/hexanes); 96% *ee*,  $t_{R1}$  = 11.29 min (major),  $t_{R2}$  = 15.30 min (minor). Chiral HPLC conditions: Chiralcel OD-H, 1.0 mL/min, hexanes/*i*-PrOH 100:3.  $[\alpha]_D^{23.4} = -117.8$  ( $c = 0.2$ , CHCl<sub>3</sub>). <sup>1</sup>H NMR (500 MHz, CDCl<sub>3</sub>)  $\delta$  7.35-7.26 (m, 3H), 7.23 (dd,  $J = 3.2, 1.2$  Hz, 1H), 7.21-7.20 (m, 1H), 7.18-7.12 (m, 3H), 5.44-5.40 (m, 1H), 5.32-5.26 (m, 1H), 2.74 (dd,  $J = 13.6, 6.0$  Hz, 1H), 2.48-2.19 (m, 4H), 2.26 (dd,  $J = 13.6, 10.0$  Hz, 1H), and 1.78-

1.59 (m, 4H).  $^{13}\text{C}$  NMR (100 MHz,  $\text{CDCl}_3$ )  $\delta$  177.3, 152.9, 151.7, 151.0, 129.3, 129.0, 127.4, 125.9, 124.3, 124.1, 123.7, 122.9, 117.6, 117.6, 116.7, 76.2, 50.2, 34.2, 29.4, 26.3, and 26.0. IR (neat)  $\nu$  3055 (w), 2969 (m), 2922 (w), 1913 (w), 1765 (s), 1599 (m)  $\text{cm}^{-1}$ . HRMS [ESI,  $(\text{C}_{22}\text{H}_{20}\text{O}_3+\text{Na})^+$ ] Calcd: 355.1310, Found:  $m/z$  355.1310.

**(S)-5-(Cyclohexylidenemethyl)-4,5-dihydro-2H-spiro[furan-3,9'-xanthen]-2'-one**

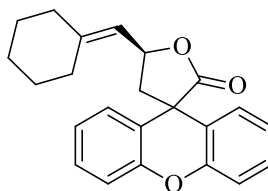

Viscous oil, yield 28 mg (92%),  $R_f = 0.43$  (2:3,  $\text{Et}_2\text{O}$ /hexanes), 84% *ee*,  $t_{R1} = 9.00$  min (major),  $t_{R2} = 11.23$  min (minor). Chiral HPLC conditions: Chiralcel OD-H, 1.0 mL/min, hexanes/*i*-PrOH 100:5.  $[\alpha]_D^{23.7} = -67.9$  ( $c = 0.2$ ,  $\text{CHCl}_3$ ).  $^1\text{H}$  NMR (500 MHz,  $\text{CDCl}_3$ )  $\delta$  7.35-7.12 (m, 8H), 5.44 (ddd,  $J = 10.0, 8.4, 6.0$  Hz, 1H), 5.25 (d,  $J = 8.4$  Hz, 1H), 2.74 (dd,  $J = 13.6, 6.4$  Hz, 1H), 2.31-2.12 (m, 4H), 2.26 (dd,  $J = 13.6, 10.0$  Hz, 1H), and 1.64-1.48 (m, 6H).  $^{13}\text{C}$  NMR (101 MHz,  $\text{CDCl}_3$ )  $\delta$  177.3, 151.7, 151.0, 148.8, 129.3, 129.0, 127.5, 125.9, 124.3, 124.1, 123.7, 122.9, 119.0, 117.6, 116.7, 73.8, 50.8, 50.3, 37.1, 29.8, 28.4, 27.9, and 26.6. IR (neat):  $\nu$  2955 (w), 2769 (w), 1909 (w), 1751 (s), 1685 (w), 1616 (m)  $\text{cm}^{-1}$ . HRMS [ESI,  $(\text{C}_{23}\text{H}_{22}\text{O}_3+\text{Na})^+$ ] Calcd: 369.1467, Found:  $m/z$  369.1477.

**(S)-5-(Cycloheptylidenemethyl)-4,5-dihydro-2H-spiro[furan-3,9'-xanthen]-2'-one**

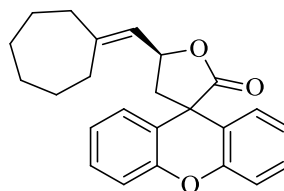



Viscous oil, yield 29 mg (93%),  $R_f = 0.44$  (2:3, Et<sub>2</sub>O/hexanes), 87% *ee*,  $t_{R1} = 8.90$  min (major),  $t_{R2} = 11.32$  min (minor). Chiral HPLC conditions: Chiralcel OD-H, 1.0 mL/min, hexanes/*i*-PrOH 100:5.  $[\alpha]_D^{23.7} = -96.9$  ( $c = 0.1$ , CHCl<sub>3</sub>). <sup>1</sup>H NMR (500 MHz, CDCl<sub>3</sub>)  $\delta$  7.36-7.13 (m, 8H), 5.41 (ddd,  $J = 10.0, 9.0, 6.0$  Hz, 1H), 5.33 (d,  $J = 9.0$  Hz, 1H), 2.75 (dd,  $J = 13.5, 6.0$  Hz, 1H), 2.45-2.26 (m, 4H), 2.26 (dd,  $J = 13.5, 10.0$  Hz, 1H), and 1.70-1.47 (m, 8H). <sup>13</sup>C NMR (126 MHz, CDCl<sub>3</sub>)  $\delta$  177.3, 151.7, 151.0, 150.6, 129.3, 129.0, 127.5, 125.9, 124.3, 124.1, 123.7, 122.9, 122.4, 117.6, 116.7, 74.3, 50.6, 50.2, 37.9, 30.7, 29.7, 29.1, 28.7, and 27.3. IR (neat):  $\nu = 3039$  (w), 2923 (w), 2850 (w), 1882 (w), 1758 (s), and 1607 (m) cm<sup>-1</sup>. HRMS [ESI, (C<sub>24</sub>H<sub>24</sub>O<sub>3</sub>+Na)<sup>+</sup>] Calcd: 383.1623, Found:  $m/z$  383.1603.

**(*S*)-5-(Cyclooctylidenemethyl)-4,5-dihydro-2*H*-spiro[furan-3,9'-xanthen]-2'-one**

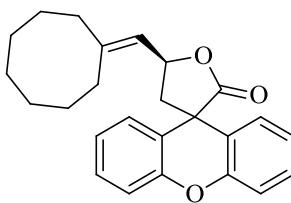

Viscous oil, yield 27.5 mg (92%),  $R_f = 0.45$  (2:3, Et<sub>2</sub>O/hexanes), 90% *ee*,  $t_{R1} = 8.20$  min (major),  $t_{R2} = 9.65$  min (minor). Chiral HPLC conditions: Chiralcel OD-H, 1.0 mL/min, hexanes/*i*-PrOH 100:5.  $[\alpha]_D^{23.7} = -158.8$  ( $c = 0.5$ , CHCl<sub>3</sub>). <sup>1</sup>H NMR (500 MHz, CDCl<sub>3</sub>)  $\delta$  7.36-7.14 (m, 8H), 5.48-5.43 (m, 1H), 5.35 (d,  $J = 9.0$  Hz, 1H), 2.75 (dd,  $J = 13.5, 6.5$  Hz, 1H), 2.32-2.24 (m, 5H), and 1.79-1.43 (m, 10H) <sup>13</sup>C NMR (126 MHz, CDCl<sub>3</sub>)  $\delta$  177.4, 151.7, 151.2, 150.9, 129.3, 129.0, 127.5, 125.8, 124.3, 124.1, 123.7, 122.9, 122.4, 117.6, 116.7, 74.4, 50.5, 50.2, 37.6, 29.7, 28.2, 27.3, 26.3, 26.1, and 25.8. IR (neat):  $\nu = 3039$  (w), 2923 (w), 2854 (w), 1909 (w), 1776 (s), 1657 (w), 1600 (m) cm<sup>-1</sup>. HRMS [ESI, (C<sub>25</sub>H<sub>26</sub>O<sub>3</sub>+Na)<sup>+</sup>] Calcd: 397.1780, Found:  $m/z$  397.1765.

**(*S*)-5-(Cycloheptylidenemethyl)-3,3-bis(4-methoxyphenyl)dihydrofuran-2(3*H*)-one**

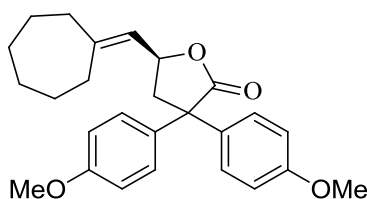

Viscous oil, yield 29.0 mg (97%),  $R_f = 0.42$  (1:1, Et<sub>2</sub>O/hexanes), 81% *ee*,  $t_{R1} = 13.90$  min (major),  $t_{R2} = 17.87$  min (minor). Chiral HPLC conditions: Chiralcel OD-H, 1.0 mL/min, hexanes/*i*PrOH 100:5.  $[\alpha]_D^{23.8} = -78.9$  ( $c = 0.35$ , THF). <sup>1</sup>H NMR (500 MHz, CDCl<sub>3</sub>)  $\delta = 7.31$  (d,  $J = 9.0$  Hz, 2H), 7.19 (d,  $J = 9.0$  Hz, 2H), 6.90 (d,  $J = 9.0$  Hz, 2H), 6.82 (d,  $J = 9.0$  Hz, 2H), 5.27 (d,  $J = 8.5$  Hz, H), 5.06-5.01 (m, 1H), 3.81 (s, 3H), 3.77 (s, 3H), 2.99 (dd,  $J = 13.0, 5.0$  Hz, 1H), 2.61 (dd,  $J = 13.0, 10.5$  Hz, 1H), 2.34-2.20 (m, 4H), and 1.64-1.43 (m, 8H). <sup>13</sup>C NMR (126 MHz, CDCl<sub>3</sub>)  $\delta$  178.0, 159.0, 158.6, 150.2, 134.9, 131.9, 128.9, 128.6, 122.4, 114.4, 113.8, 105.1, 73.8, 57.2, 55.4, 44.7, 37.9, 30.5, 29.7, 29.1, 28.7, and 27.3. IR (neat)  $\nu$  3078 (w), 3039 (w), 2930 (m), 2854 (m), 1892 (w), 1759 (s), and 1605 (m) cm<sup>-1</sup>. HRMS [ESI, (C<sub>26</sub>H<sub>30</sub>O<sub>4</sub>+Na)<sup>+</sup>] Calcd: 429.2042, Found:  $m/z$  429.2036.

**(S)-5-(Cyclooctylidenemethyl)-3,3-bis(4-methoxyphenyl)dihydrofuran-2(3H)-one**

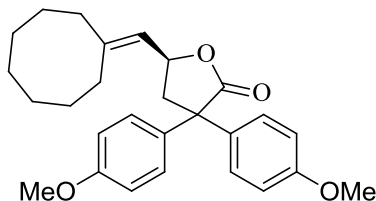

Viscous oil, yield 29.0 mg (97%),  $R_f = 0.42$  (1:1, Et<sub>2</sub>O/hexanes), 72% *ee*,  $t_{R1} = 6.36$  min (major),  $t_{R2} = 12.38$  min (minor). Chiral HPLC conditions: Chiralcel OD, 1.0 mL/min, hexanes/*i*-PrOH 100:5.  $[\alpha]_D^{22.2} = -57.9$  ( $c = 0.3$ , THF). <sup>1</sup>H NMR (600 MHz, CDCl<sub>3</sub>)  $\delta$  7.32 (d,  $J = 9.0$  Hz, 2H), 7.19 (d,  $J = 9.0$  Hz, 2H), 6.90 (d,  $J = 9.0$  Hz, 2H), 6.82 (d,  $J = 9.0$  Hz, 2H), 5.29 (d,  $J = 9.0$  Hz, H), 5.09-5.05 (m, 1H), 3.82 (s, 3H), 3.77 (s, 3H), 3.00 (dd,  $J = 13.2, 4.8$  Hz, 1H), 2.61 (dd,  $J = 13.2, 10.8$  Hz, 1H), 2.36-2.20 (m, 4H), and 1.67-1.45 (m, 10H). <sup>13</sup>C NMR (151 MHz, CDCl<sub>3</sub>)  $\delta$  178.0, 159.1, 158.6, 150.7, 135.0, 131.9,

128.9, 128.6, 122.5, 114.4, 113.8, 73.9, 57.1, 55.4, 44.8, 37.6, 29.6, 28.3, 27.3, 26.3, 26.0 and 25.8. IR (neat):  $\nu = 3000$  (w), 2923 (m), 2850 (m), 2121 (w), and 1759 (s)  $\text{cm}^{-1}$ . HRMS [ESI,  $(\text{C}_{27}\text{H}_{32}\text{O}_4+\text{Na})^+$ ] Calcd: 443.2198, Found:  $m/z$  443.2184.

**(S)-3,3-bis(4-Chlorophenyl)-5-(2-methylprop-1-en-1-yl)dihydrofuran-2(3H)-one**

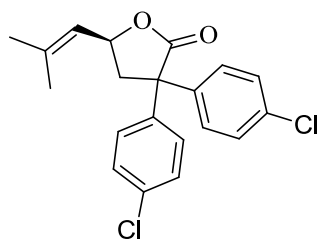

Viscous oil, yield 28.0 mg (95%),  $R_f = 0.45$  (3:7,  $\text{Et}_2\text{O}$ /hexanes), 85% *ee*,  $t_{R1} = 12.76$  min (minor),  $t_{R2} = 15.88$  min (major). Chiral HPLC conditions: Chiralpack AD-H, 1.0 mL/min, hexanes/*i*-PrOH 100:5.  $[\alpha]_D^{23.8} = -135.8$  ( $c = 0.2$ ,  $\text{CHCl}_3$ ).  $^1\text{H}$  NMR (600 MHz,  $\text{CDCl}_3$ )  $\delta$  7.36-7.21 (m, 8H), 5.24-5.23 (m, 1H), 5.02-4.97 (m, 1H), 2.99-2.95 (m, 1H), 2.64-2.60 (m, 1H), 1.77 (d,  $J = 2.4$  Hz, 3H), and 1.68 (d,  $J = 2.4$  Hz, 3H).  $^{13}\text{C}$  NMR (151 MHz,  $\text{CDCl}_3$ )  $\delta = 176.5, 141.6, 140.3, 138.1, 134.2, 133.6, 129.4, 129.2, 128.8, 128.8, 121.7, 74.0, 57.5, 44.1, 26.0, \text{ and } 18.7$ . IR (neat):  $\nu$  2979 (w), 2930 (w), 1911 (w), 1758 (s), 1649 (w)  $\text{cm}^{-1}$ . HRMS [ESI,  $(\text{C}_{20}\text{H}_{18}\text{Cl}_2\text{O}_2)^+$ ] Calcd: 360.0684, Found:  $m/z$  360.0673.

**(S)-3,3-bis(4-Chlorophenyl)-5-(cyclopentylidene)methyl)dihydrofuran-2(3H)-one**

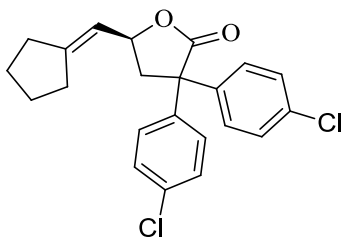

Solid (mp = 103-104  $^\circ\text{C}$ ), yield 28.0 mg (93%),  $R_f = 0.46$  (3:7,  $\text{Et}_2\text{O}$ /hexanes), 85% *ee*,  $t_{R1} = 12.76$  min (minor),  $t_{R2} = 15.88$  min (major). Chiral HPLC conditions: Chiralpack AD-H, 1.0 mL/min, hexanes/*i*-PrOH 100:5.  $[\alpha]_D^{22.1} = -81.7$  ( $c = 0.3$ , THF).  $^1\text{H}$  NMR (500 MHz,  $\text{CDCl}_3$ )  $\delta$  7.37-7.22 (m,

8H), 5.37-5.34 (m, 1H), 4.94-4.89 (m, 1H), 3.00 (dd,  $J = 13.0, 5.2$  Hz, 1H), 2.68 (dd,  $J = 13.2, 10.4$  Hz, 1H), 2.39-2.26 (m, 3H), 2.24- 2.15 (m, 1H), and 1.72-1.54 (m, 4H).  $^{13}\text{C}$  NMR (126 MHz,  $\text{CDCl}_3$ )  $\delta = 176.6, 153.2, 140.4, 138.2, 134.2, 133.6, 129.4, 129.2, 128.8, 128.8, 117.0, 75.8, 57.5, 43.9, 34.2, 29.4, 26.3,$  and  $26.0$ . IR (neat)  $\nu = 2977$  (w),  $2922$  (w),  $1909$  (w),  $1752$  (s),  $1647$  (w)  $\text{cm}^{-1}$ . HRMS [ESI,  $(\text{C}_{22}\text{H}_{20}\text{Cl}_2\text{O}_2+\text{Na})^+$ ] Calcd:  $409.0738$ , Found:  $m/z$   $409.0735$ .

**(S)-3,3-bis(4-Chlorophenyl)-5-(cyclooctylidenemethyl)dihydrofuran-2(3H)-one**

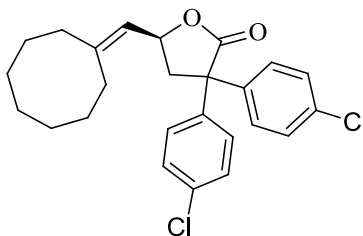

Viscous oil, yield 29.0 mg (97%),  $R_f = 0.47$  (3:7,  $\text{Et}_2\text{O}/\text{hexanes}$ ), 87%  $ee$ ,  $t_{R1} = 21.03$  min (minor),  $t_{R2} = 22.74$  min (major). Chiral HPLC conditions: Chiralcel OD-H, 0.5 mL/min, hexanes/*i*-PrOH 100:5.  $[\alpha]_D^{23.2} = -72.3$  ( $c = 0.3$ , THF).  $^1\text{H}$  NMR (500 MHz,  $\text{CDCl}_3$ )  $\delta$  7.37-7.22 (m, 8H), 5.27 (d,  $J = 9.0$  Hz, 1H), 5.09-5.05 (m, 1H), 3.00 (dd,  $J = 13.0, 5.0$  Hz, 1H), 2.63 (dd,  $J = 13.0, 10.5$  Hz, 1H), 2.26-2.20 (m, 4H), and 1.67-1.37 (m, 10H).  $^{13}\text{C}$  NMR (126 MHz,  $\text{CDCl}_3$ )  $\delta$  176.7, 151.6, 140.5, 138.1, 134.2, 133.6, 129.4, 129.2, 128.8, 128.8, 121.8, 74.0, 57.4, 44.2, 37.6, 29.6, 28.3, 27.3, 26.3, 26.0, and 25.8. IR (neat)  $\nu$  3065 (w), 2922 (m), 2851 (m), 1897 (w), and 1760 (s)  $\text{cm}^{-1}$ . HRMS [ESI,  $(\text{C}_{25}\text{H}_{26}\text{Cl}_2\text{O}_2+\text{Na})^+$ ] Calcd:  $451.1208$ , Found:  $m/z$   $451.1210$ .

**(3S,5S)-5-(2-Methylprop-1-en-1-yl)-3-phenyldihydrofuran-2(3H)-one**

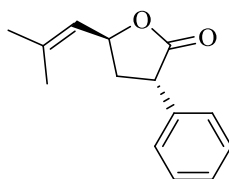

Viscous oil, yield 14.0 mg (48%),  $R_f = 0.38$  (3:7, Et<sub>2</sub>O/hexanes), 90% *ee*,  $t_{R1} = 17.76$  min (major),  $t_{R2} = 19.60$  min (minor). Chiral HPLC conditions: Chiralpack AD-H, 1.0 mL/min, hexanes/*i*-PrOH 100:5.  $[\alpha]_D^{22.5} = 76.4$  ( $c = 0.15$ , THF). <sup>1</sup>H NMR (500 MHz, CDCl<sub>3</sub>)  $\delta$  7.38-7.35 (m, 2H), 7.31-7.28 (m, 3H), 5.30-5.28 (m, 1H), 5.23-5.18 (m, 1H), 3.89 (dd,  $J = 13.0, 8.5$  Hz, 1H), 2.79-2.74 (m, 1H), 2.18-2.11 (m, 1H), 1.81 (d,  $J = 1.2$  Hz, 3H), and 1.78 (d,  $J = 1.2$  Hz, 3H). <sup>13</sup>C NMR (126 MHz, CDCl<sub>3</sub>)  $\delta$  176.9, 140.8, 136.6, 129.0, 128.3, 127.7, 122.6, 75.4, 47.6, 39.0, 25.6, and 18.7. IR (neat)  $\nu$  3057 (w), 2983 (w), 2929 (m), 2854 (m), 1972 (w), and 1707 (s) cm<sup>-1</sup>. HRMS [ESI, (C<sub>14</sub>H<sub>16</sub>O<sub>2</sub>+Na)<sup>+</sup>] Calcd: 239.1048, Found:  $m/z$  239.1061.

## References

- [1] B. H. Lipshutz, S. Ghorai, A. R. Abela, R. Moser, T. Nishikata, C. Duplais, A. Krasovskiy, R. D. Gaston, R. C. Gadwood, *J. Org. Chem.* **2011**, *76*, 4379-4391.
- [2] M. P. Muñoz, J. Adrio, J. C. Carretero, A. M. Echavarren, *Organometallics* **2005**, *24*, 1293-1300.
- [3] A. D. Melhado, M. Luparia, F. D. Toste, *J. Am. Chem. Soc.* **2007**, *129*, 12638-12639.
- [4] I. Alonso, B. Trillo, F. López, S. Montserrat, G. Ujaque, L. Castedo, A. Lledós, J. L. Mascareñas, *J. Am. Chem. Soc.* **2009**, *131*, 13020-13030.
- [5] S. Handa, L. M. Slaughter, *Angew. Chem., Int. Ed.*, **2012**, *124*, 2966-2969.
- [6] C.-M. Chao, E. Genin, P. Y. Toullec, J.-P. Genet, V. Michelet, *J. Organomet. Chem.* **2009**, *694*, 538-545.
- [7] A. S. K. Hashmi, M. Hamzić, F. Rominger, J. W. Bats, *Chem. – Eur. J.* **2009**, *15*, 13318-13322.
- [8] F. Kleinbeck, F. D. Toste, *J. Am. Chem. Soc.* **2009**, *131*, 9178-9179.
- [9] S. G. Sethofer, T. Mayer, F. D. Toste, *J. Am. Chem. Soc.* **2010**, *132*, 8276-8277.

- [10] a) G. L. Hamilton, E. J. Kang, M. Mba, F. D. Toste, *Science* **2007**, *317*, 496-499; b) T. Akiyama, H. Morita, P. Bachu, K. Mori, M. Yamanaka, T. Hirata, *Tetrahedron* **2009**, *65*, 4950-4956; c) I. Coric, B. List, *Nature* **2012**, *483*, 315-319; d) J. Guin, G. Varseev, B. List, *J. Am. Chem. Soc.* **2013**, *135*, 2100-2103.
- [11] a) S. Handa, "Design and synthesis of novel ligands for tuning of selectivity and reaction pathway in gold catalysis", Ph.D Dissertation, Oklahoma State University, Stillwater, OK **2013**.  
b) Y.-M. Zhao, Y. Tam, Y.-J. Wang, Z. Li, J. Sun, *Org. Lett.* **2012**, *14*, 1398-1401.
- [12] B. M. Trost, J. R. Corte, M. S. Gudiksen, *Angew. Chem., Int. Ed.* **1999**, *38*, 3662-3664.
- [13] S. H. Sim, H.-J. Park, S. I. Lee, Y. K. Chung, *Org. Lett.* **2008**, *10*, 433-436.
- [14] J. L. Arbour, H. S. Rzepa, A. J. P. White, K. K. Hii, *Chem. Commun.* **2009**, 7125-7127.
- [15] B. Trillo, F. Lopez, M. Gulias, L. Castedo, J. L. Mascarenas, *Angew. Chem., Int. Ed.* **2008**, *47*, 951-954.
- [16] J. Loefstedt, J. Franzen, J.-E. Backvall, *J. Org. Chem.* **2001**, *66*, 8015-8025.
- [17] M.-H. Lin, W.-S. Tsai, L.-Z. Lin, S.-F. Hung, T.-H. Chuang, Y.-J. Su, *J. Org. Chem.* **2011**, *76*, 8518-8523.
- [18] J. L. Arbour, H. S. Rzepa, J. Contreras-García, L. A. Adrio, E. M. Barreiro, K. K. Hii, *Chem. – Eur. J.* **2012**, *18*, 11317-11324.
- [19] K. Takenaka, M. Akita, Y. Tanigaki, S. Takizawa, H. Sasai, *Org. Lett.* **2011**, *13*, 3506-3509.

## PART 17: HPLC CHROMATOGRAMS

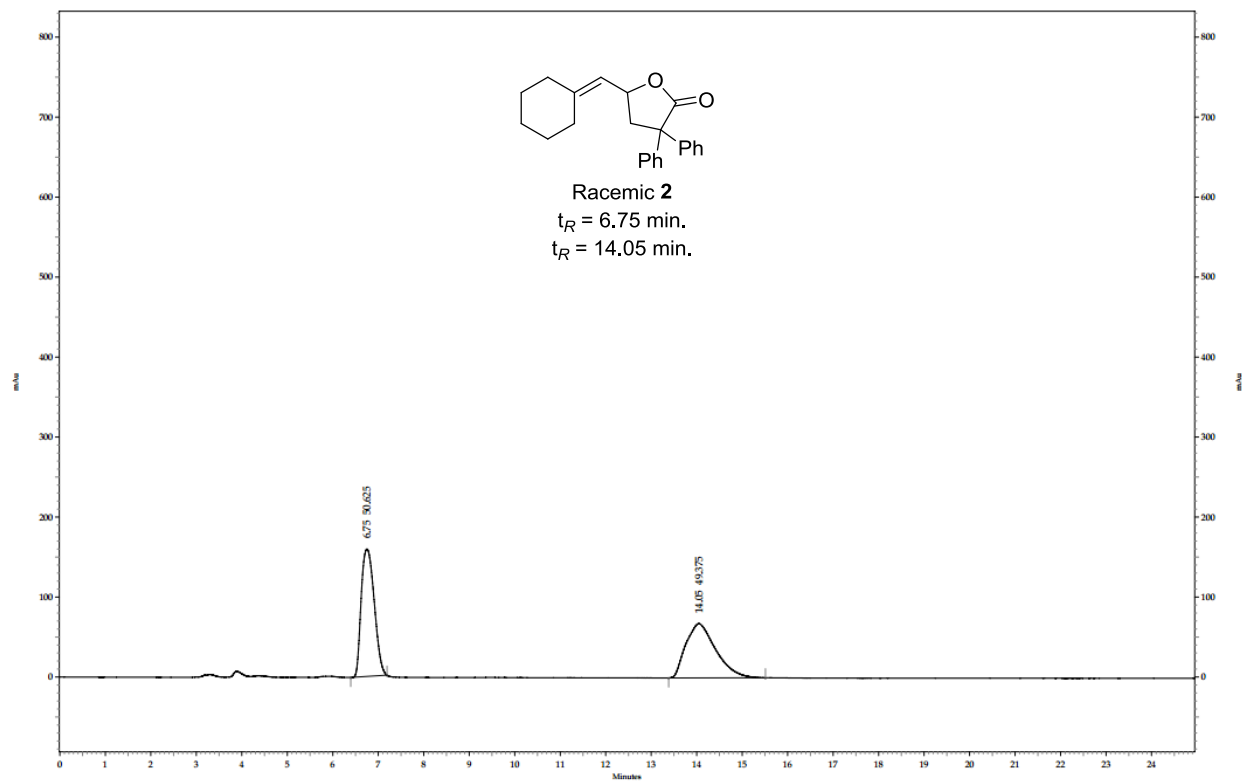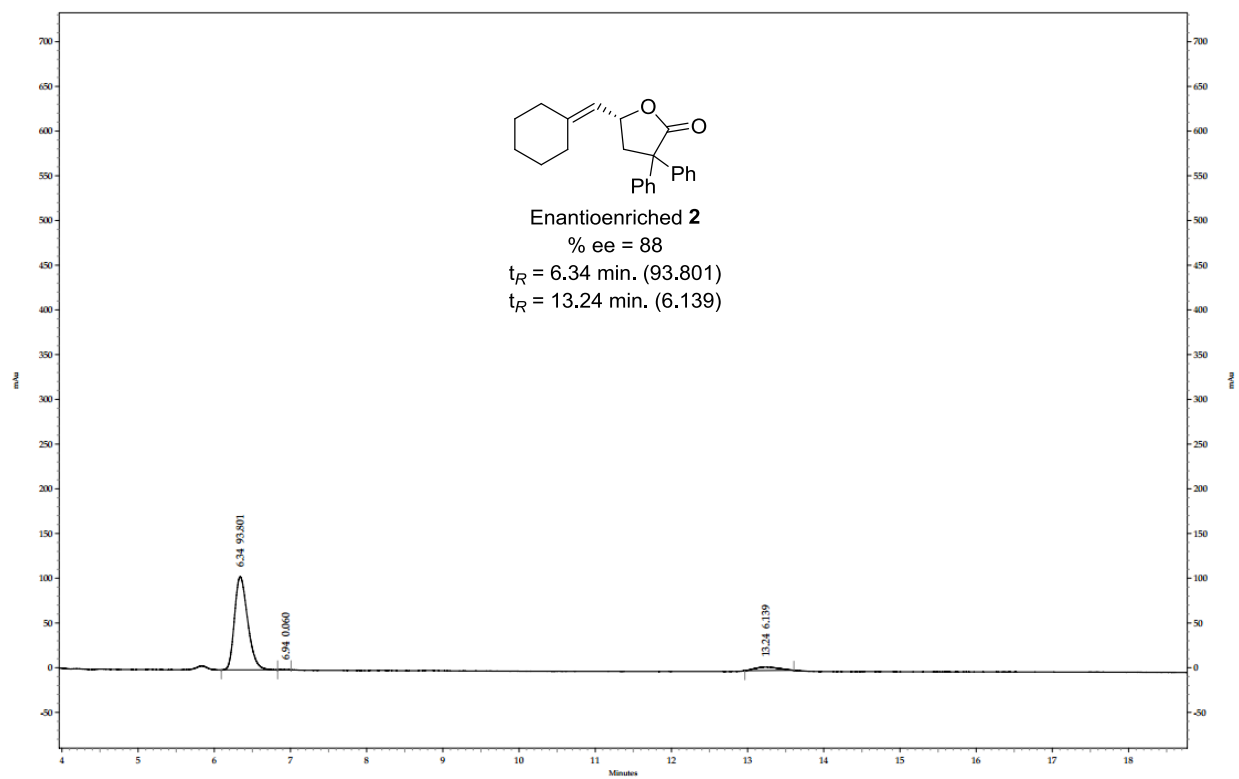

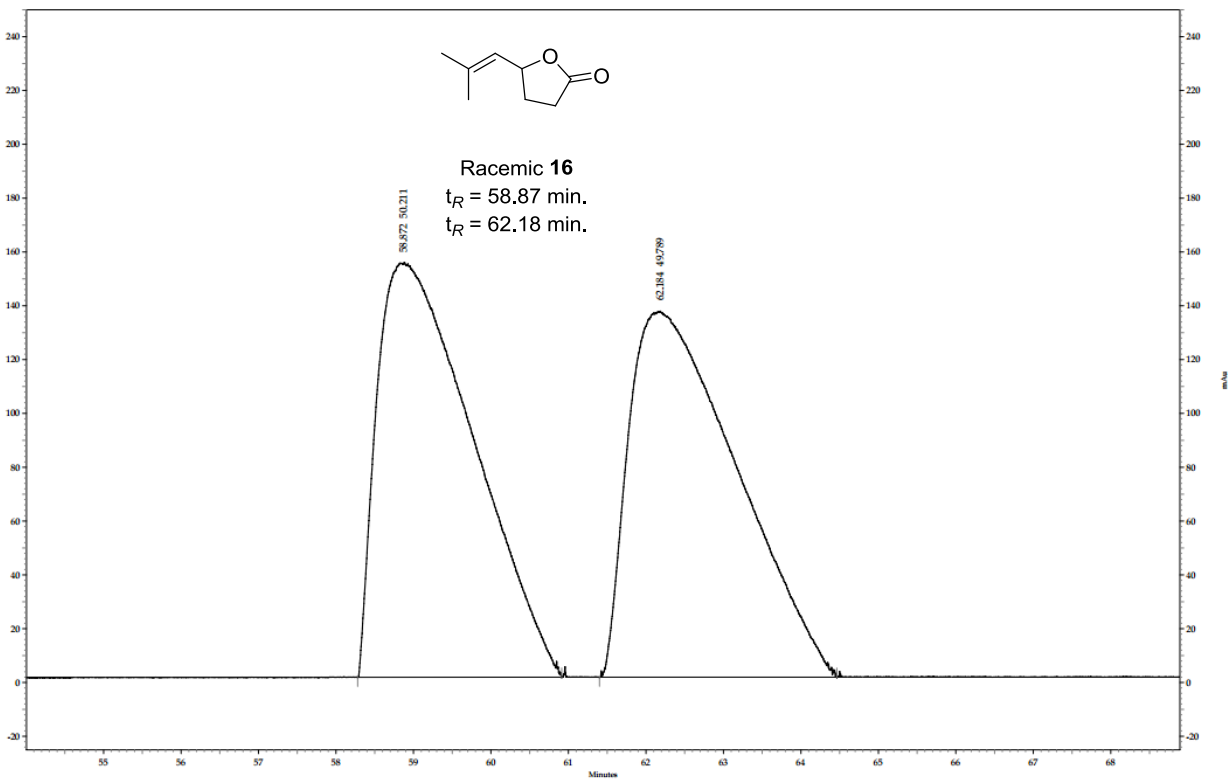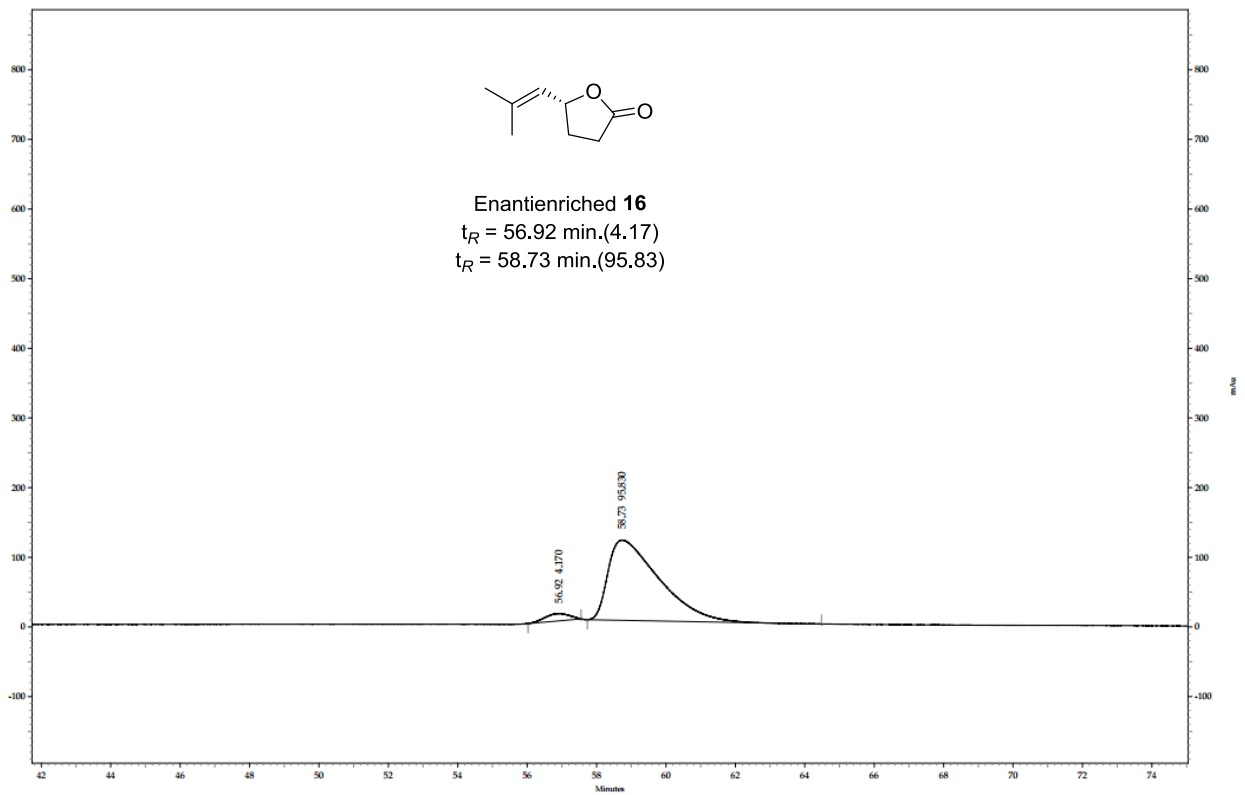



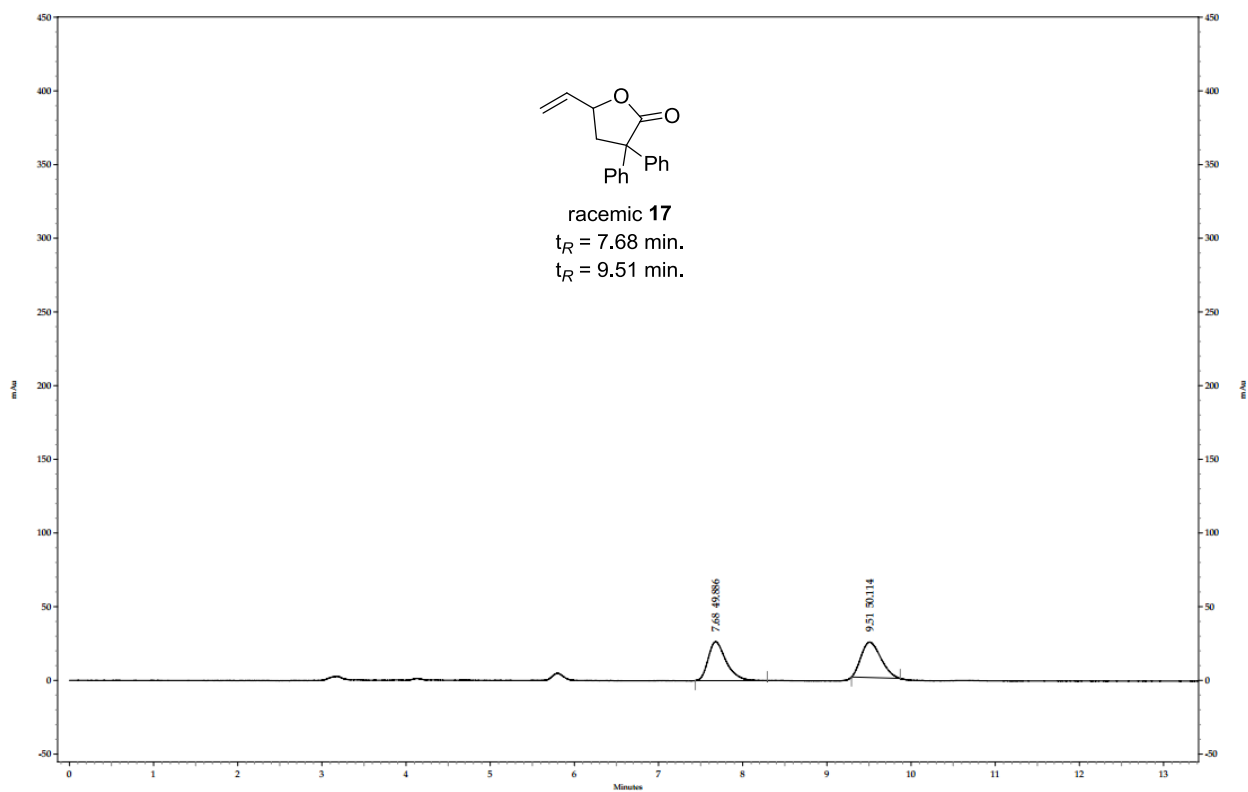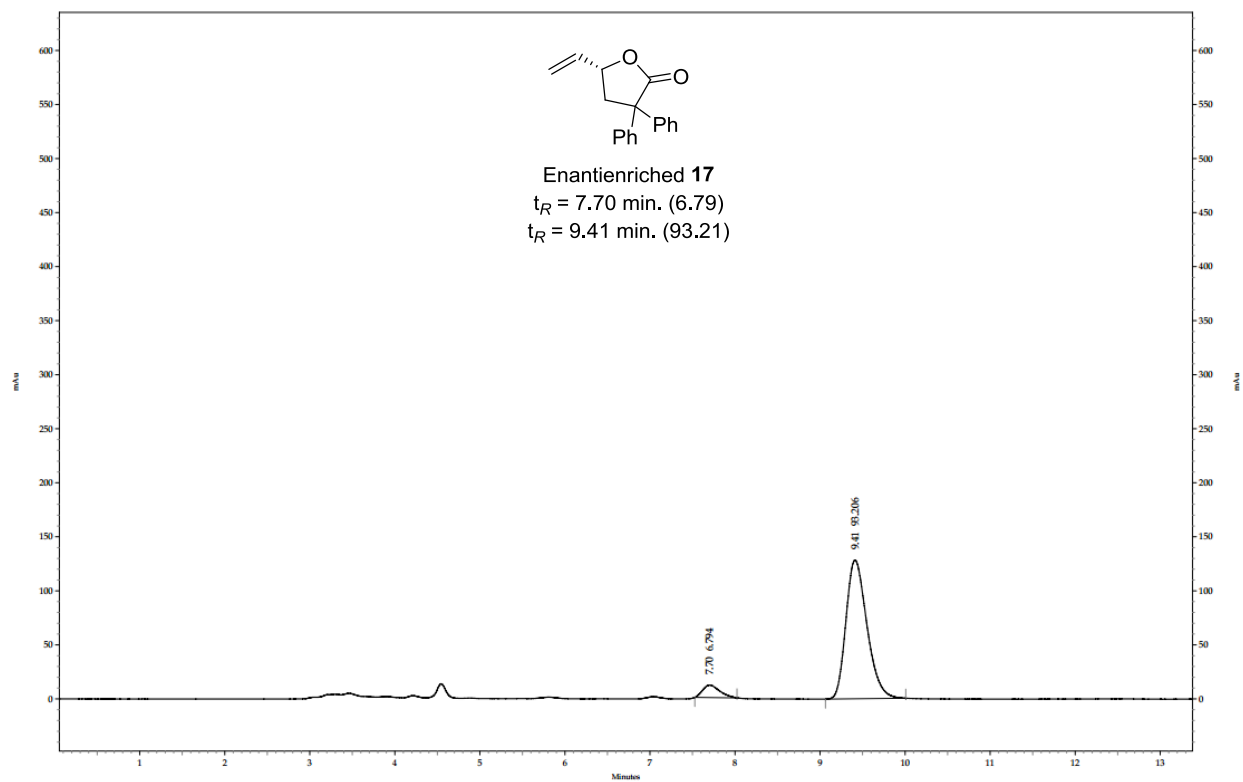

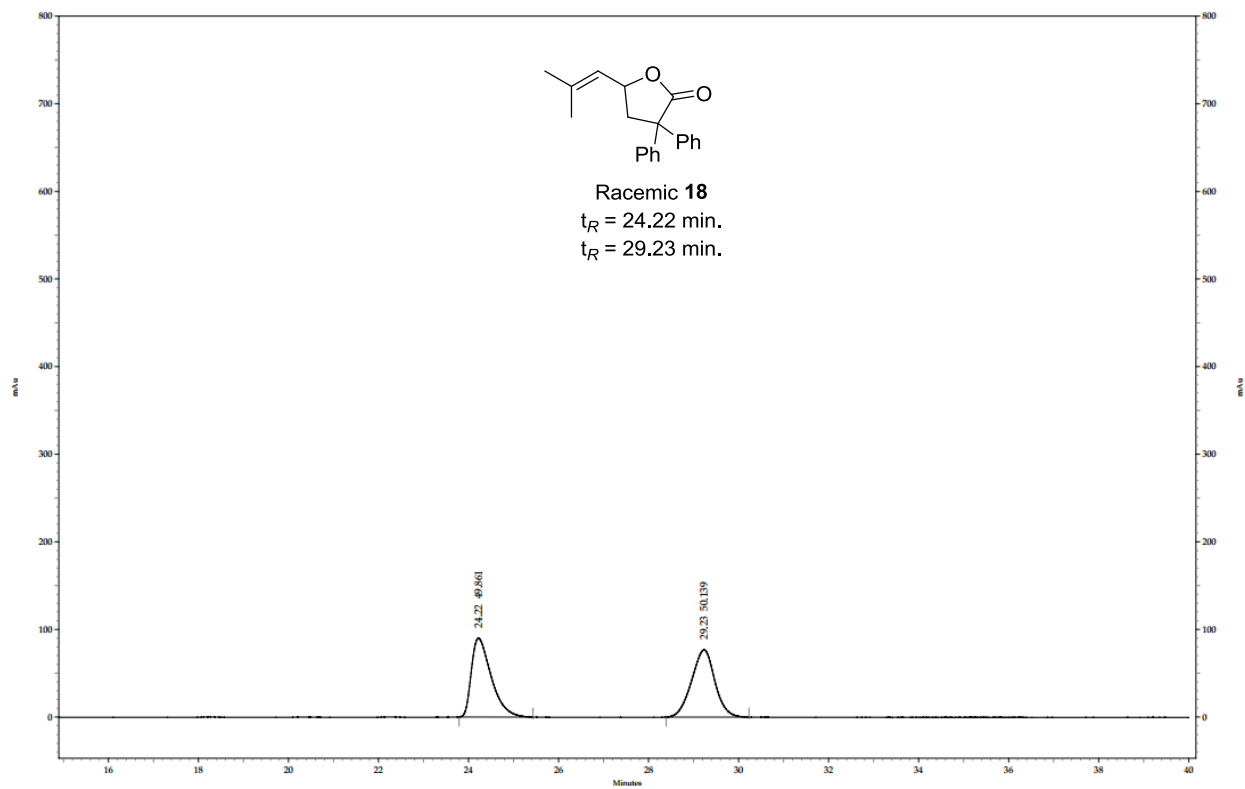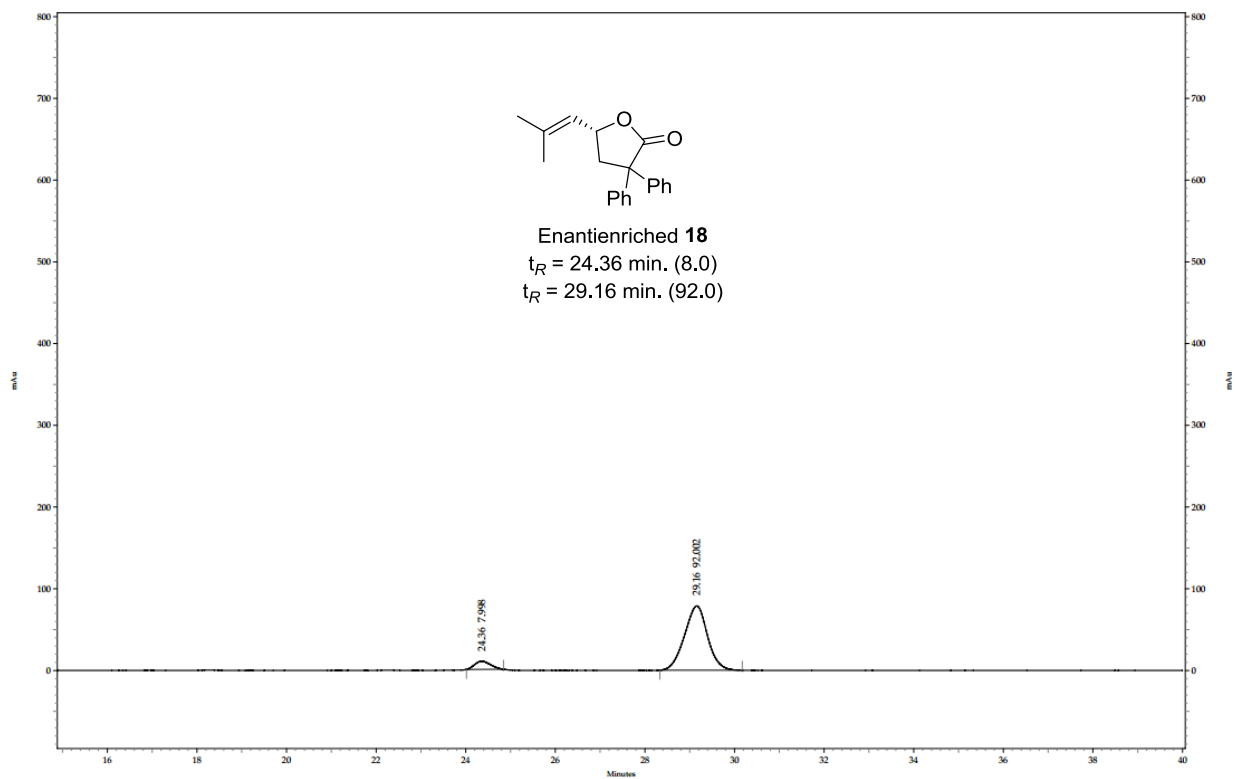

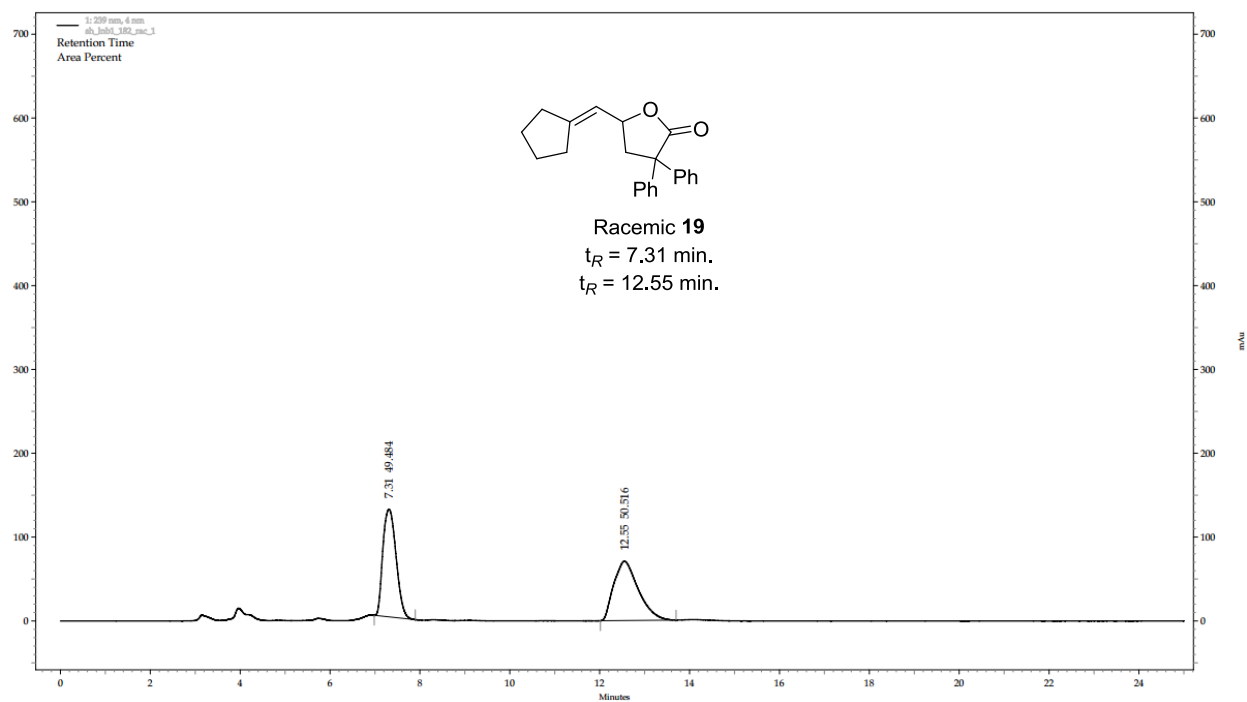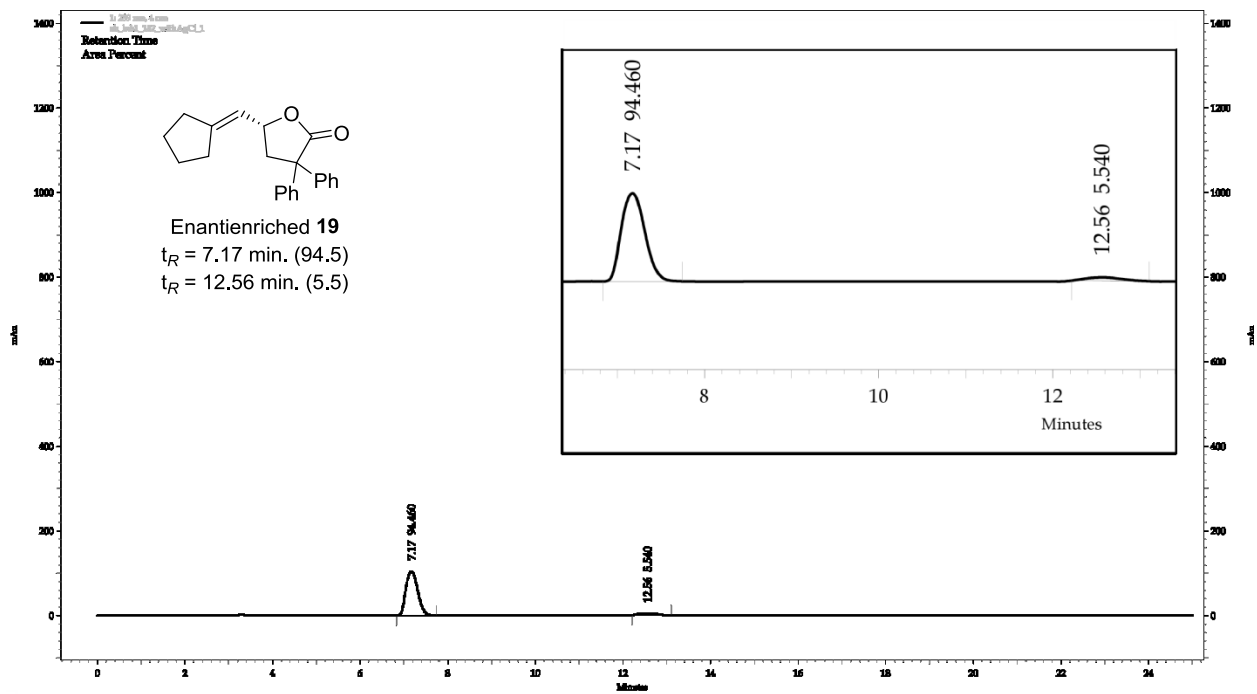

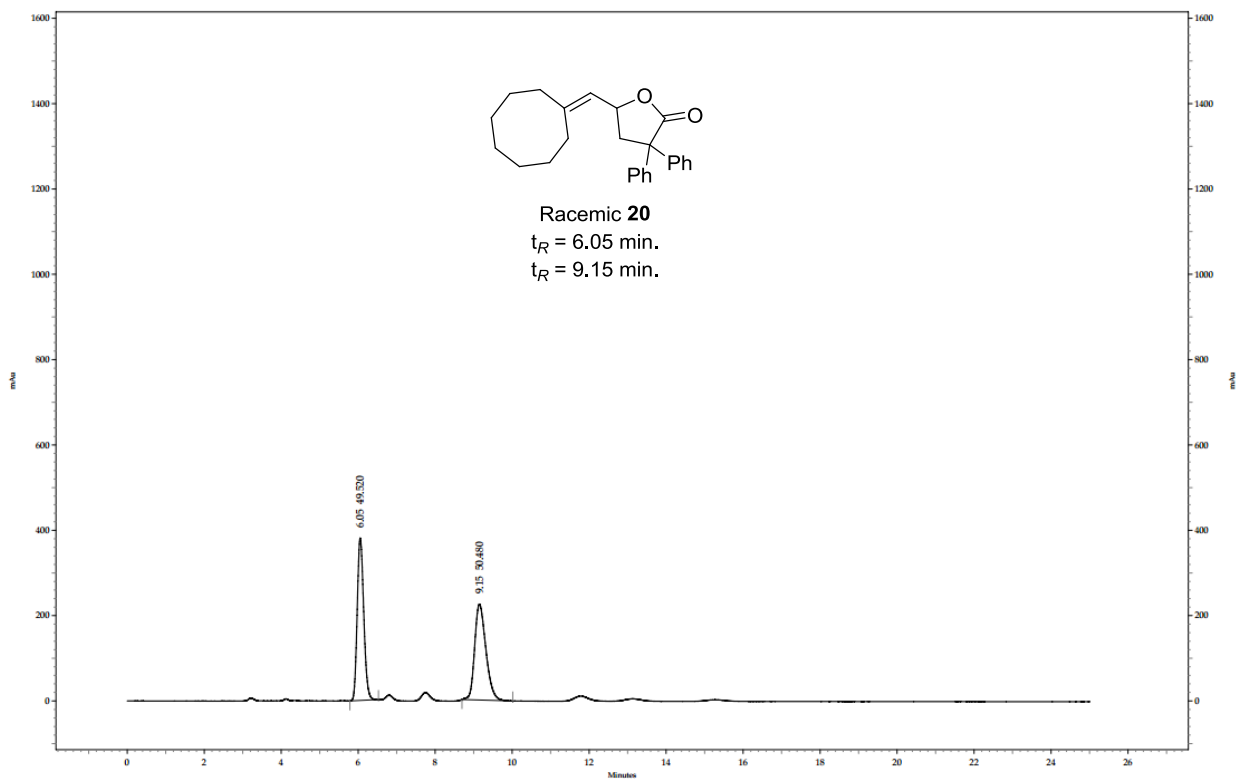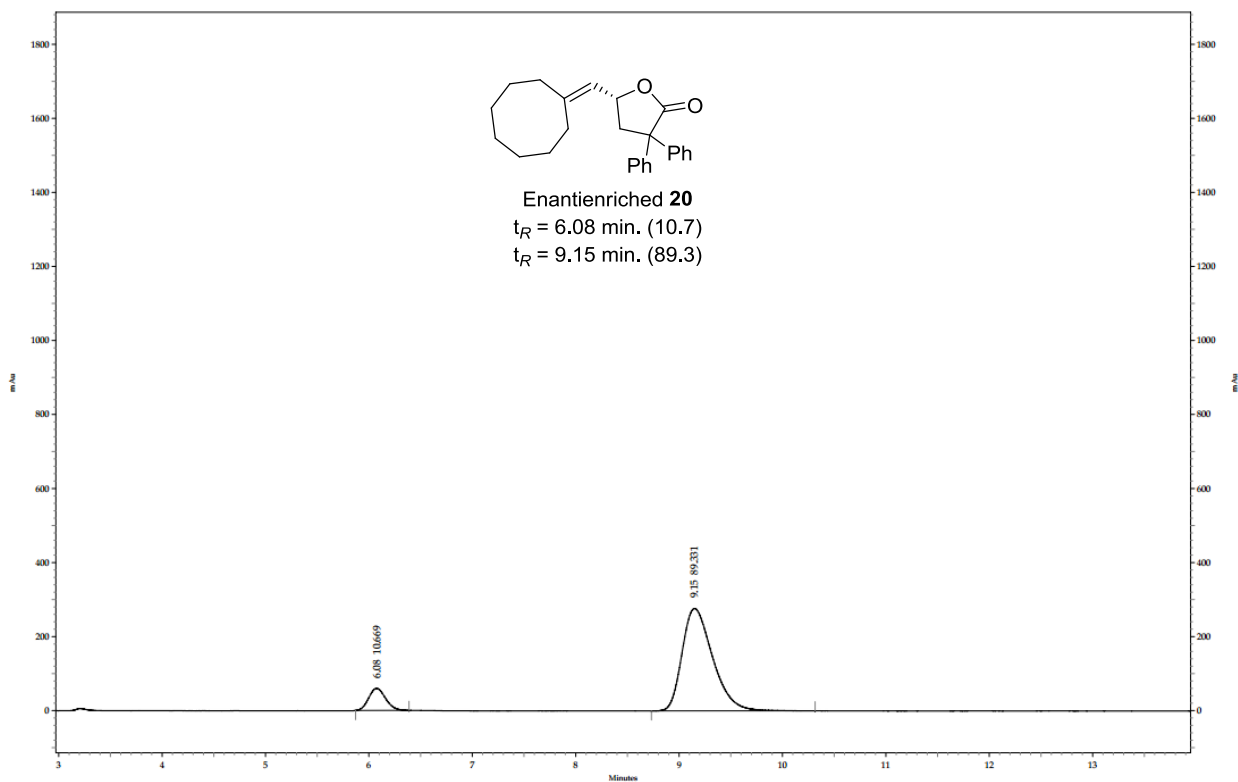

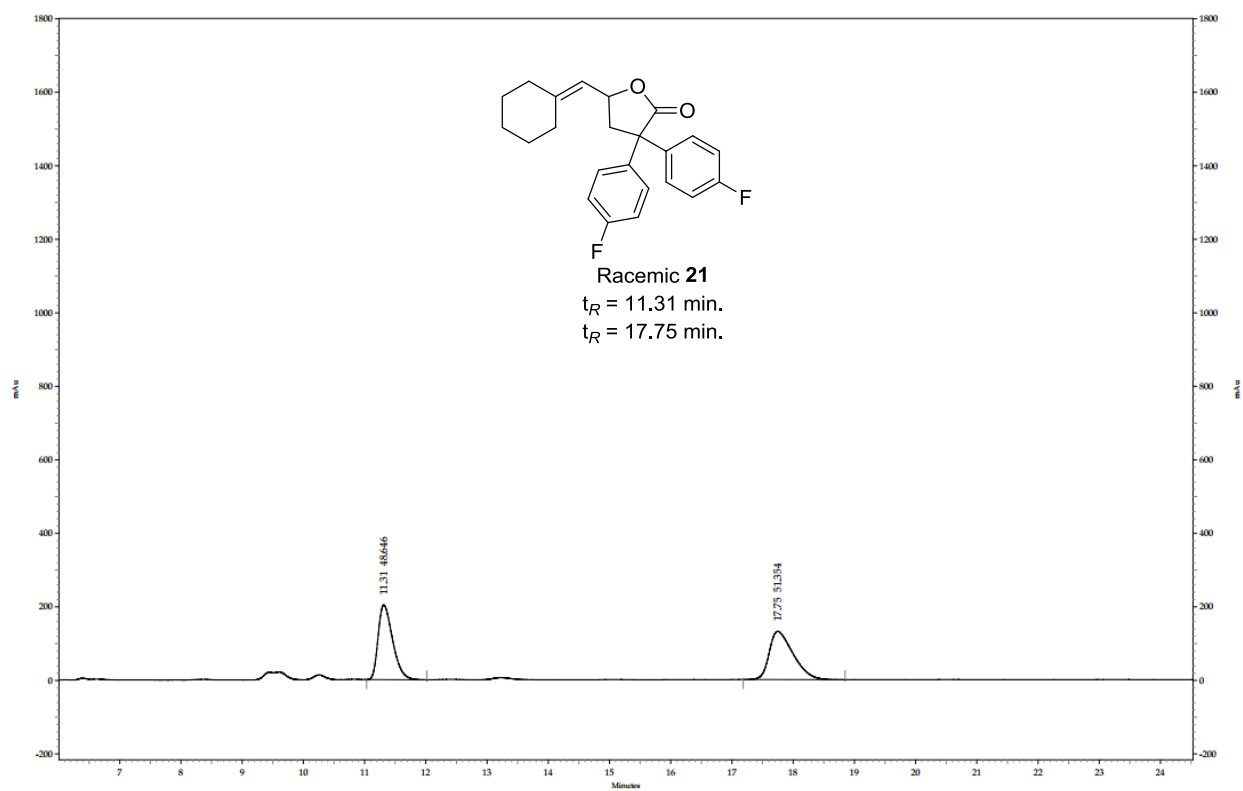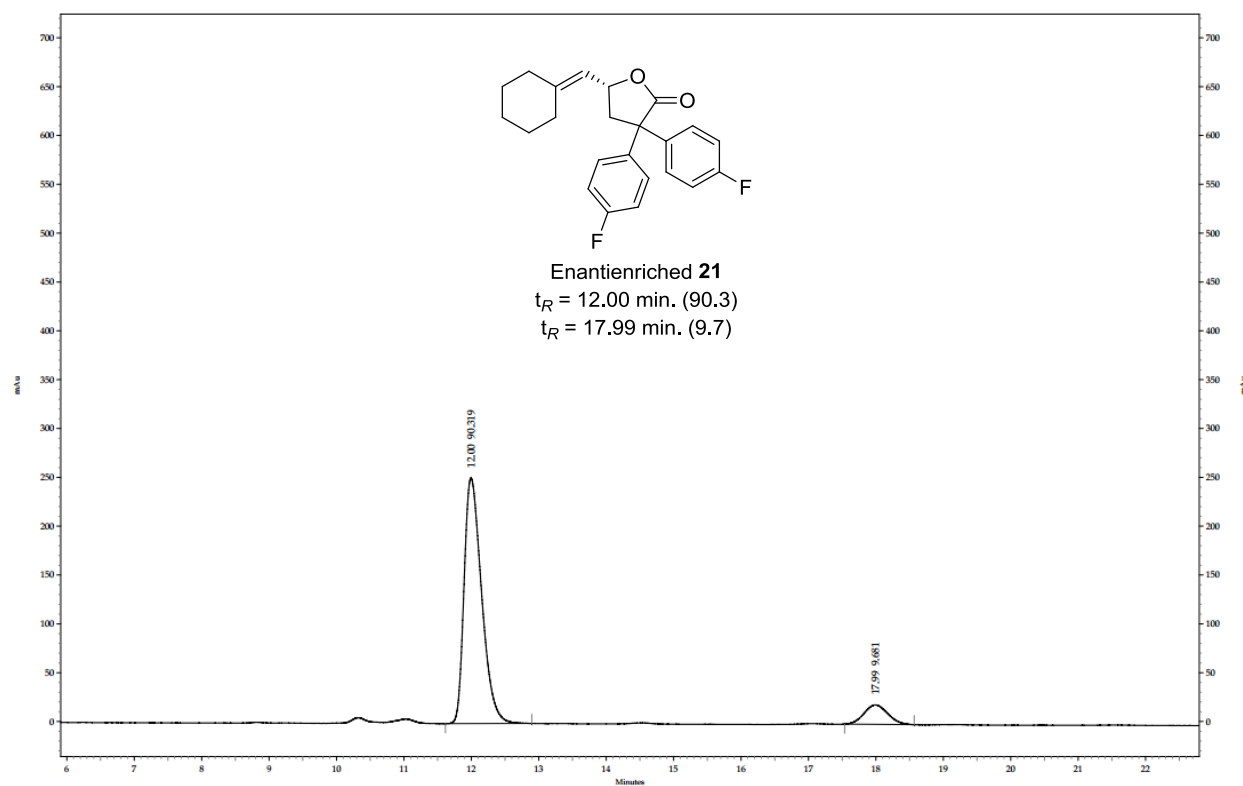

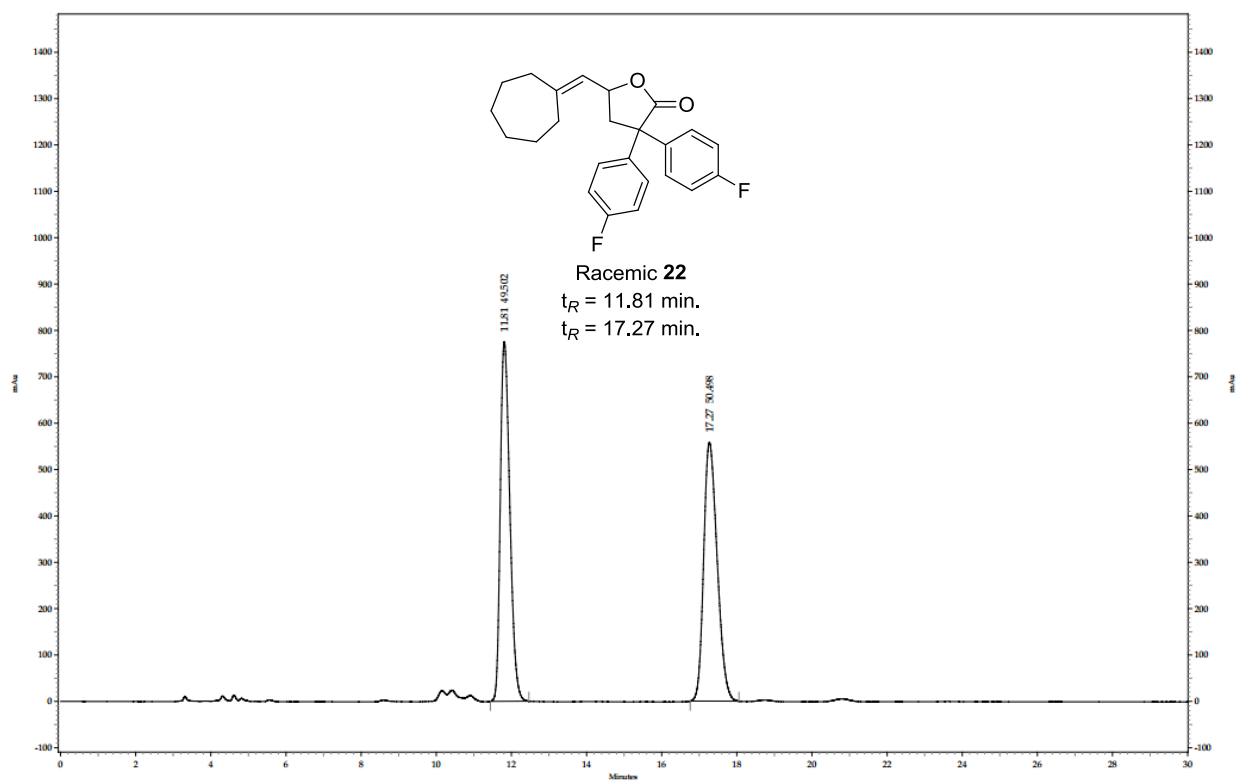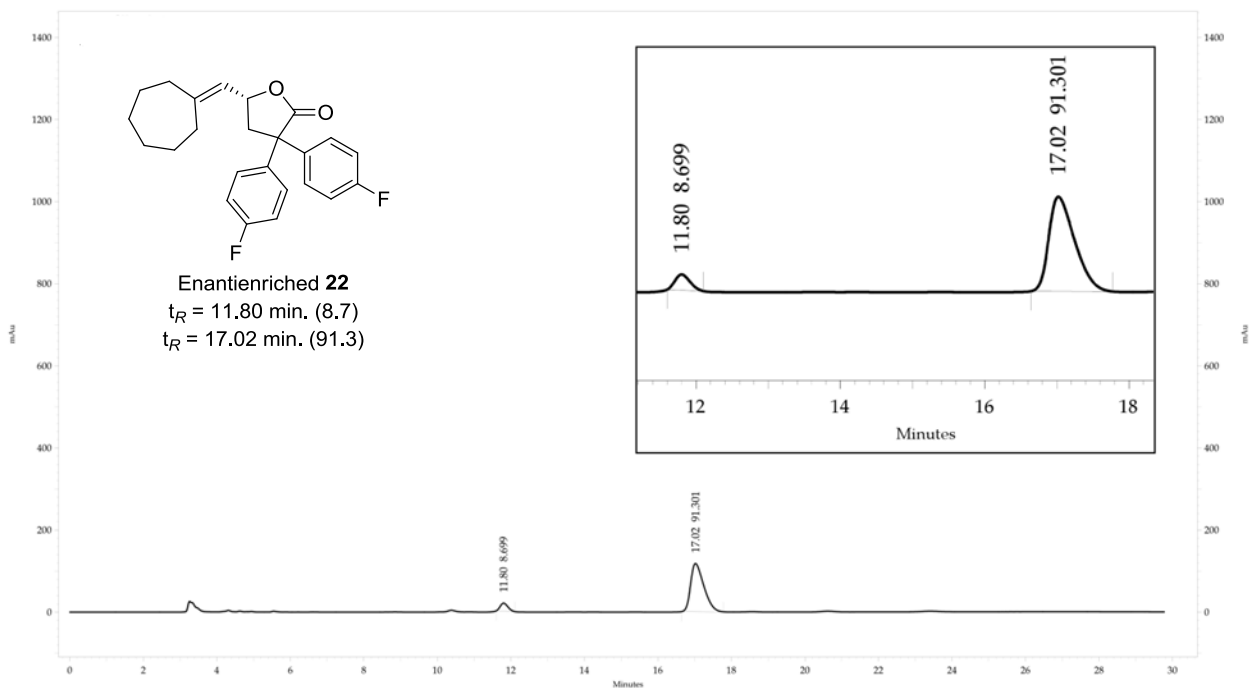

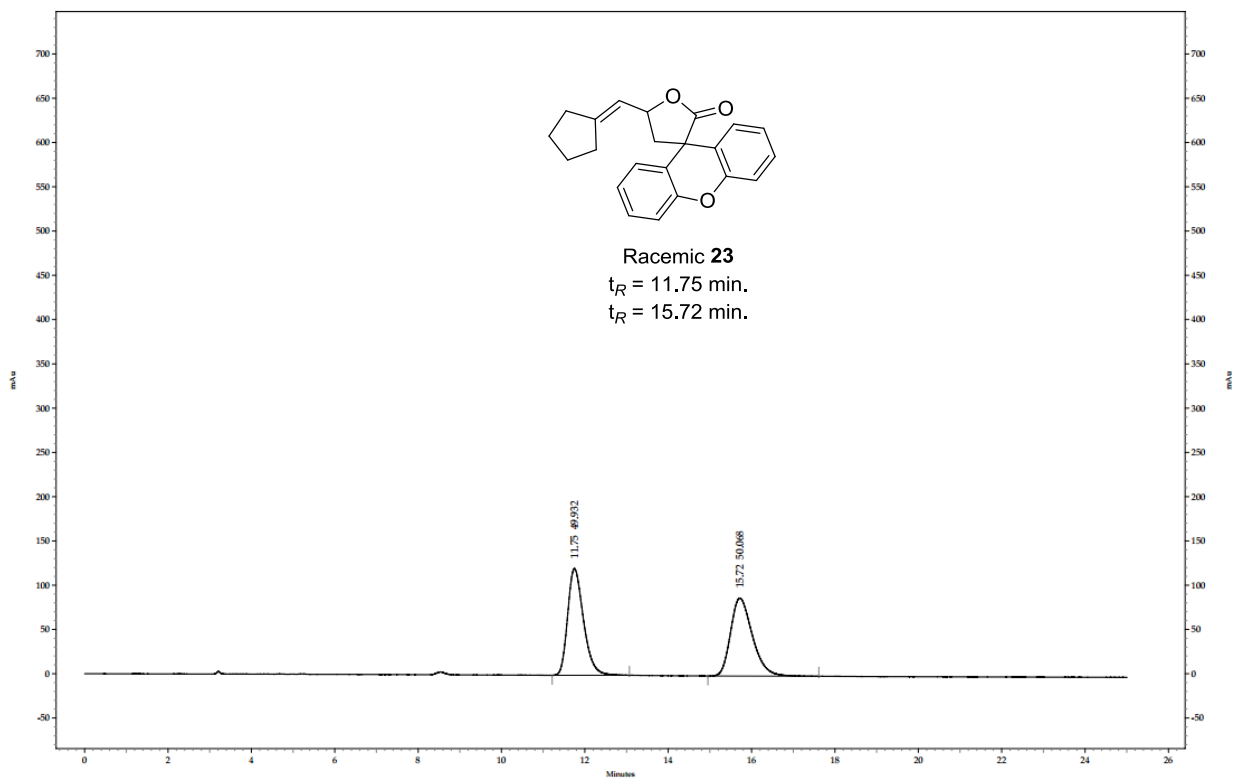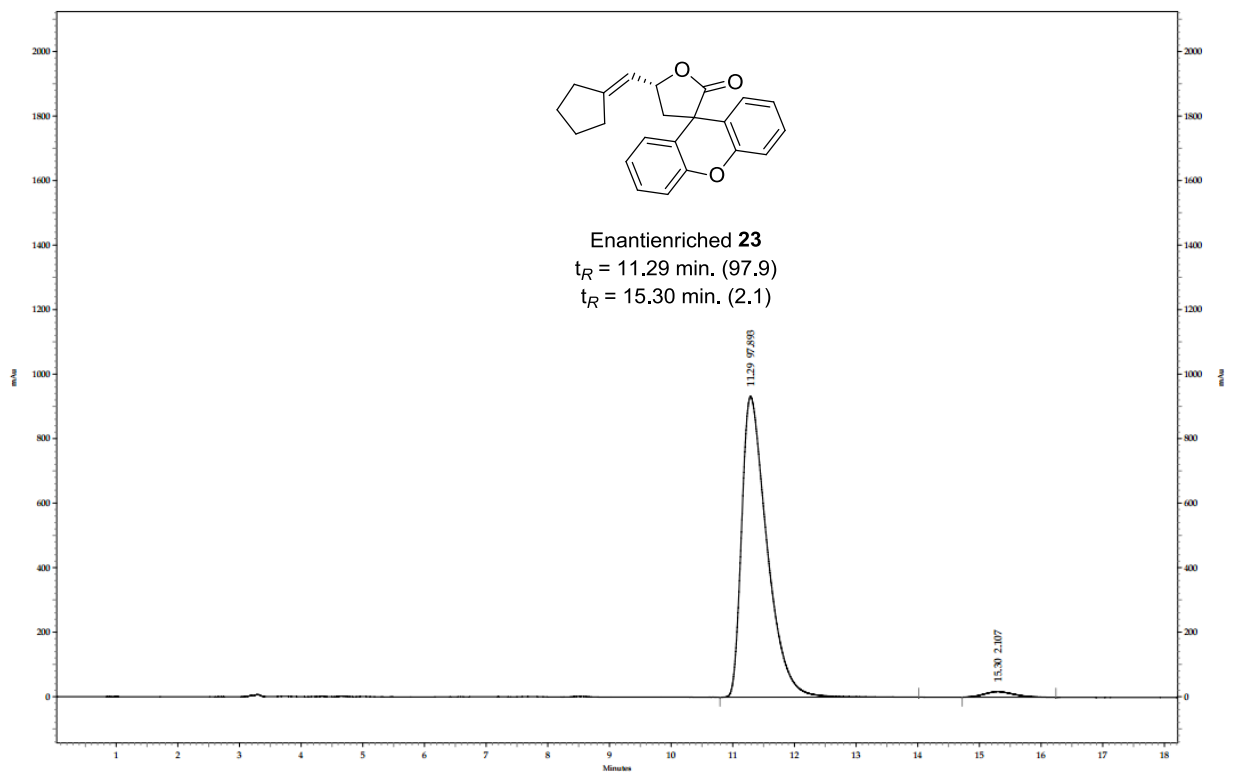

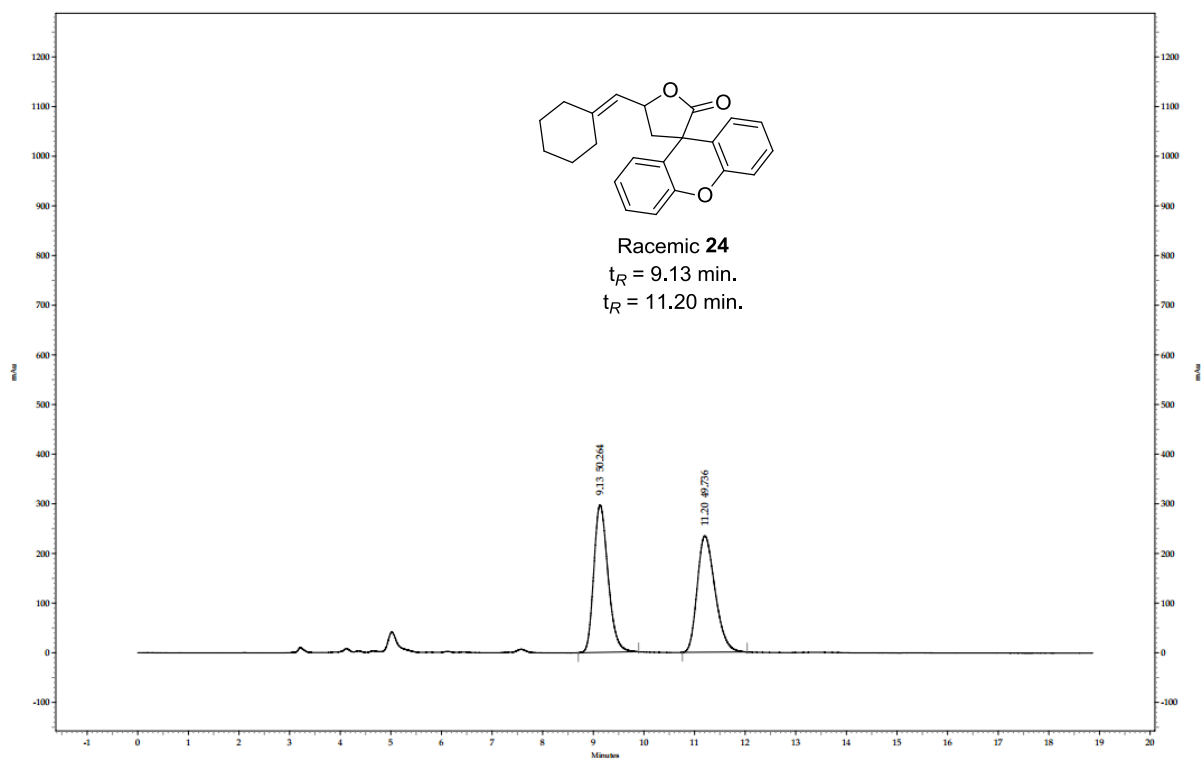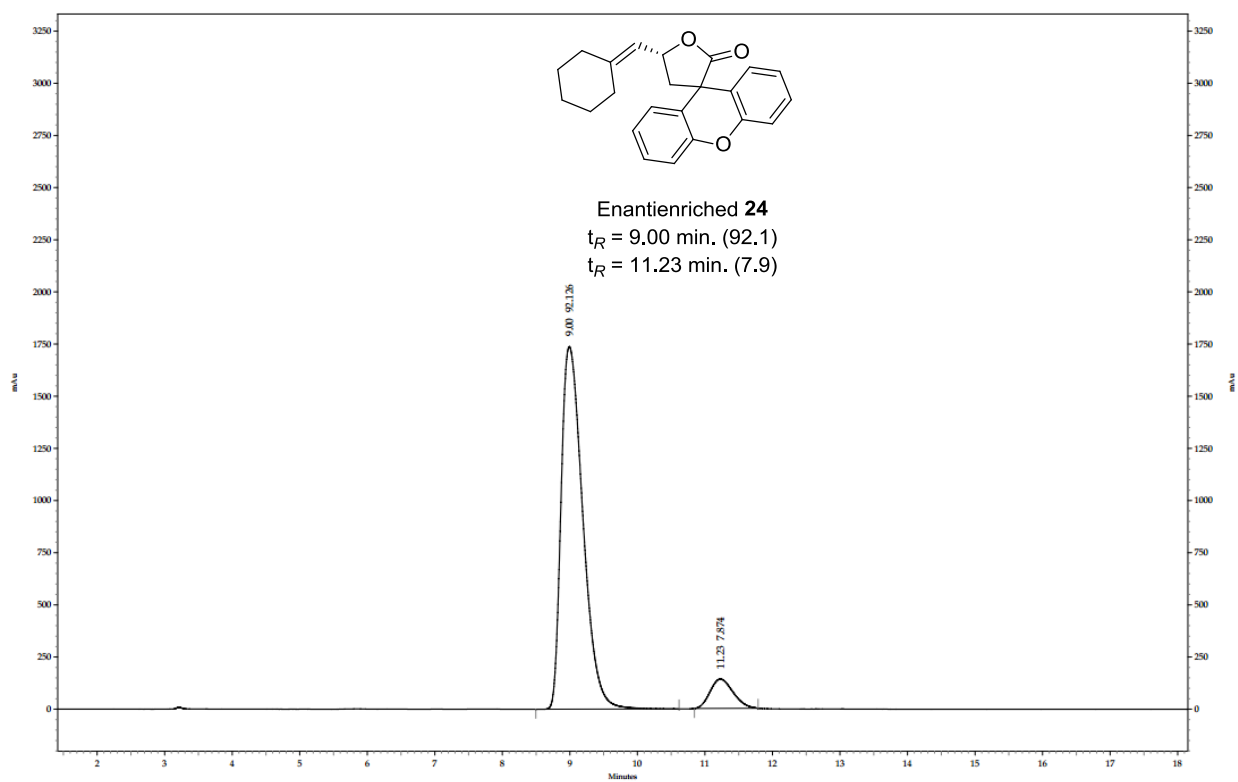



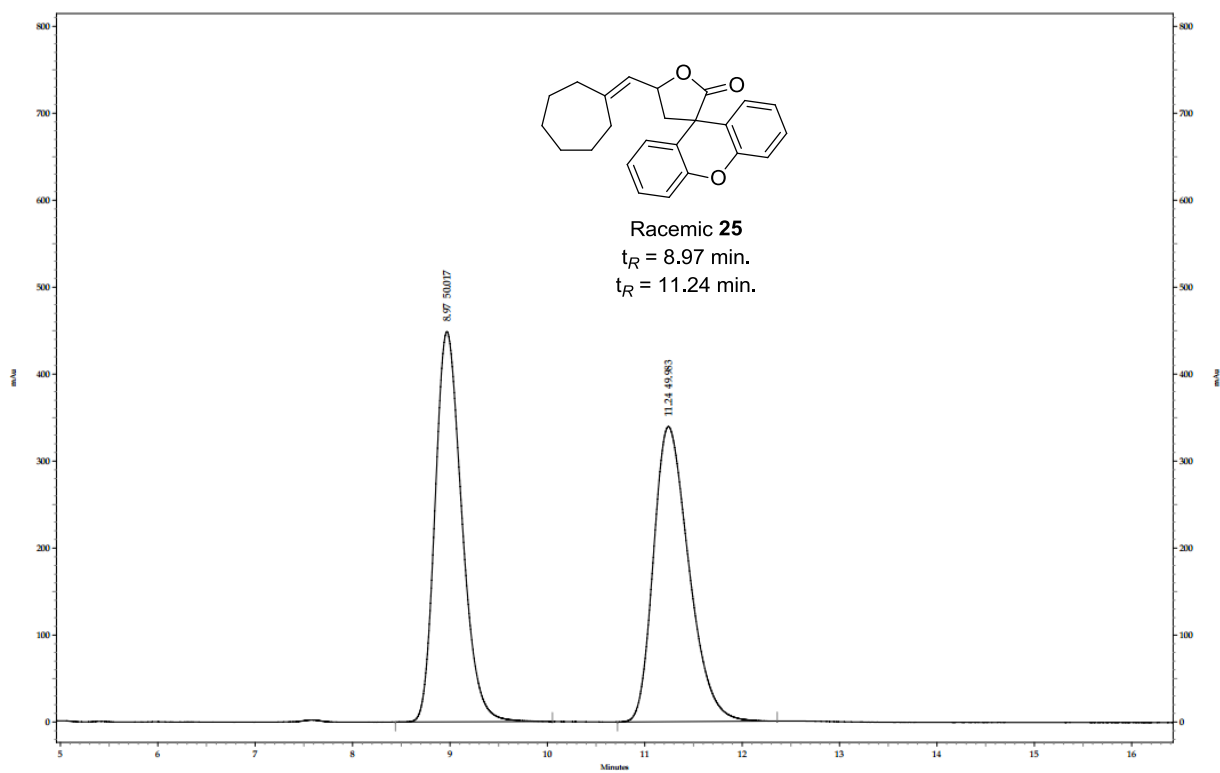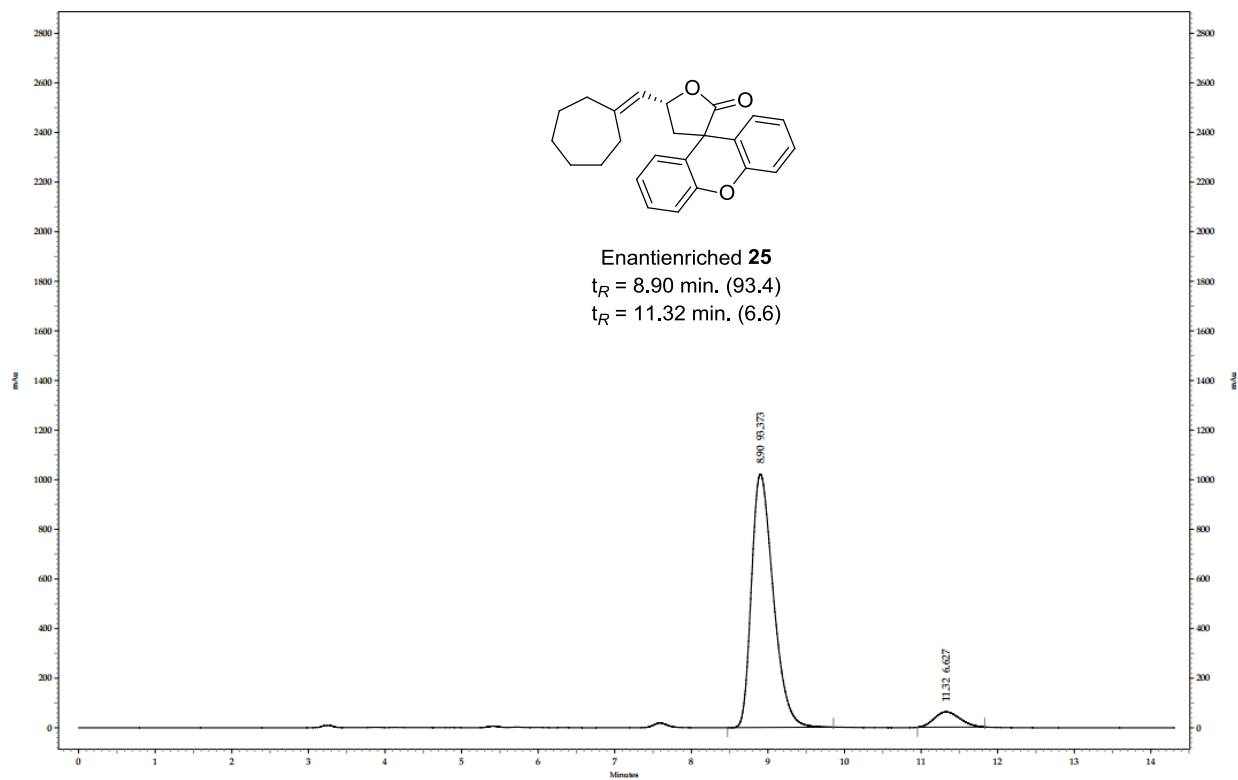

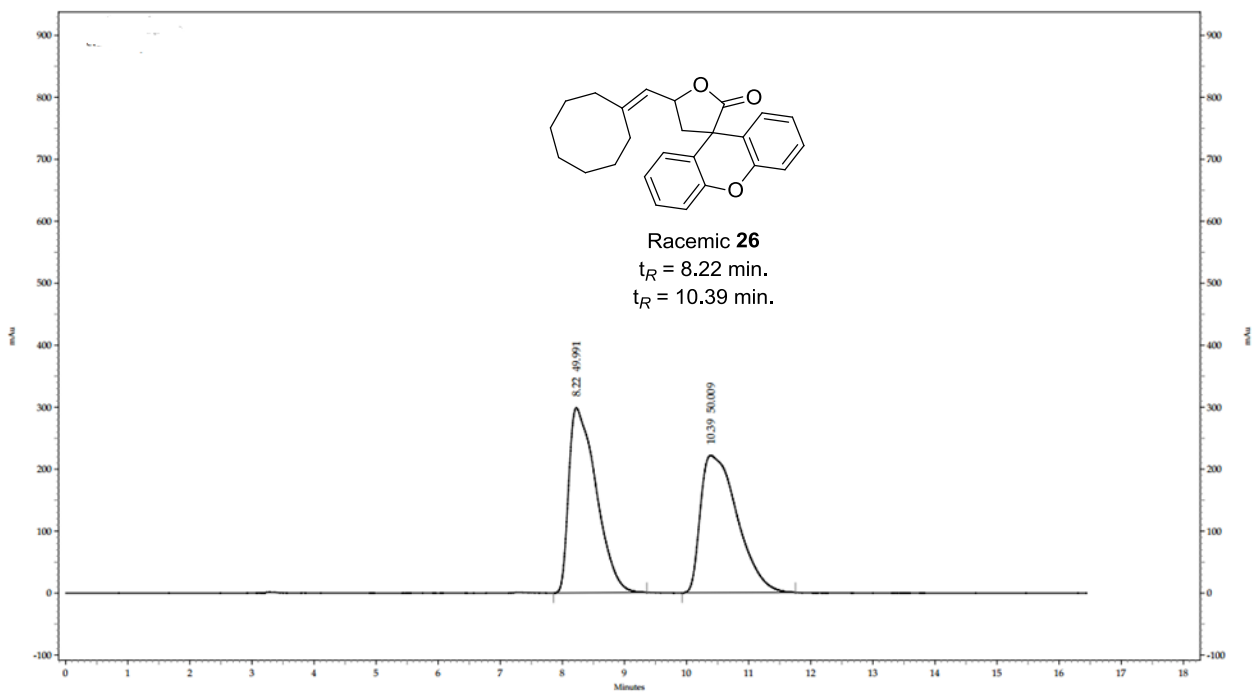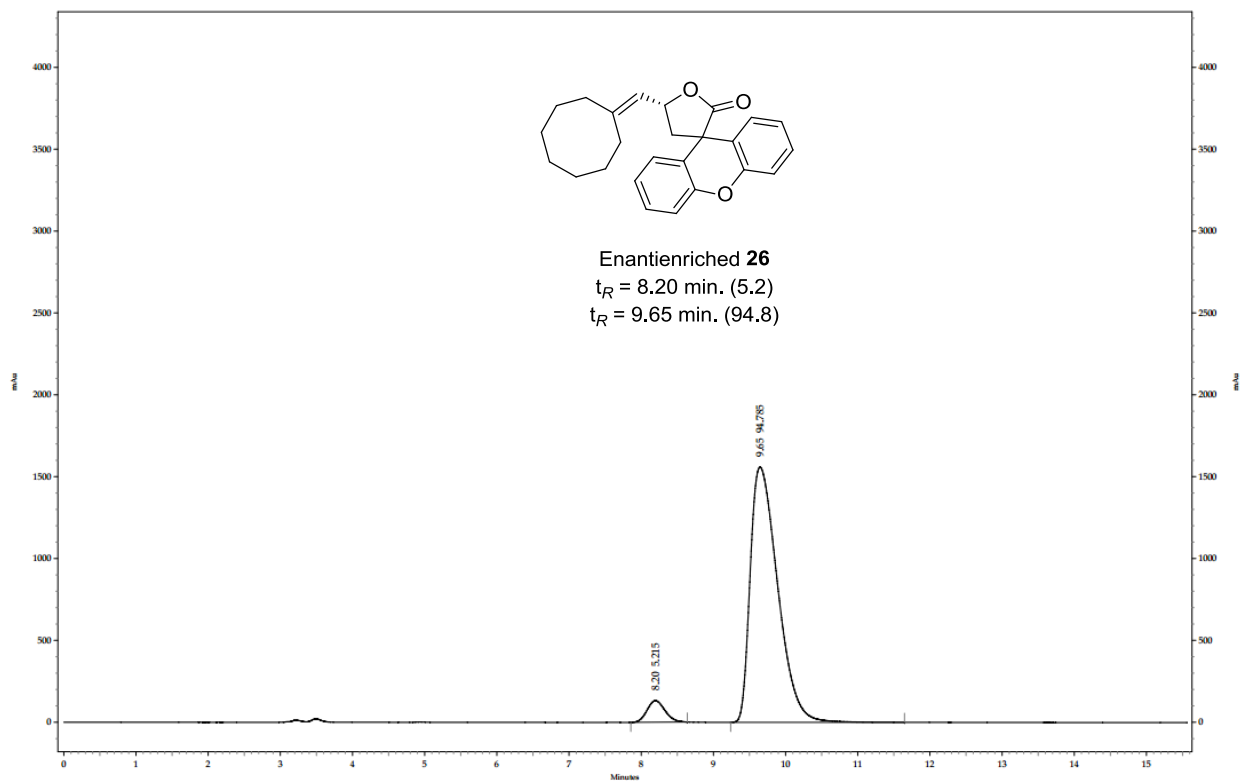

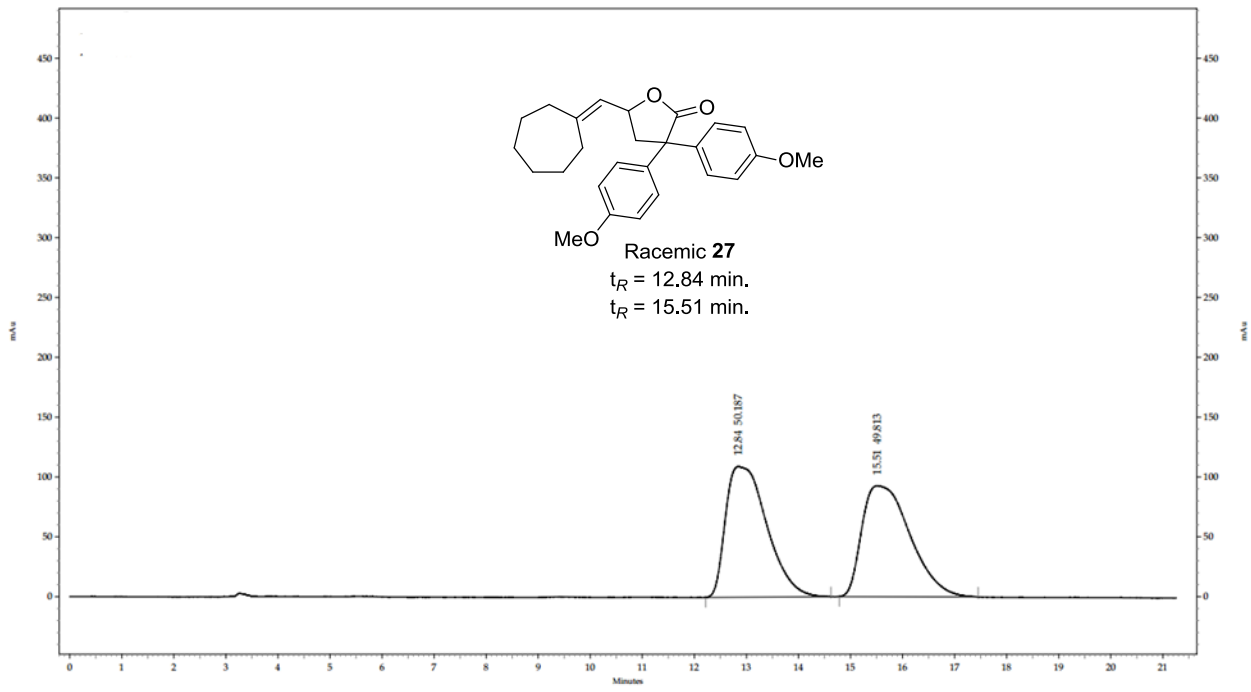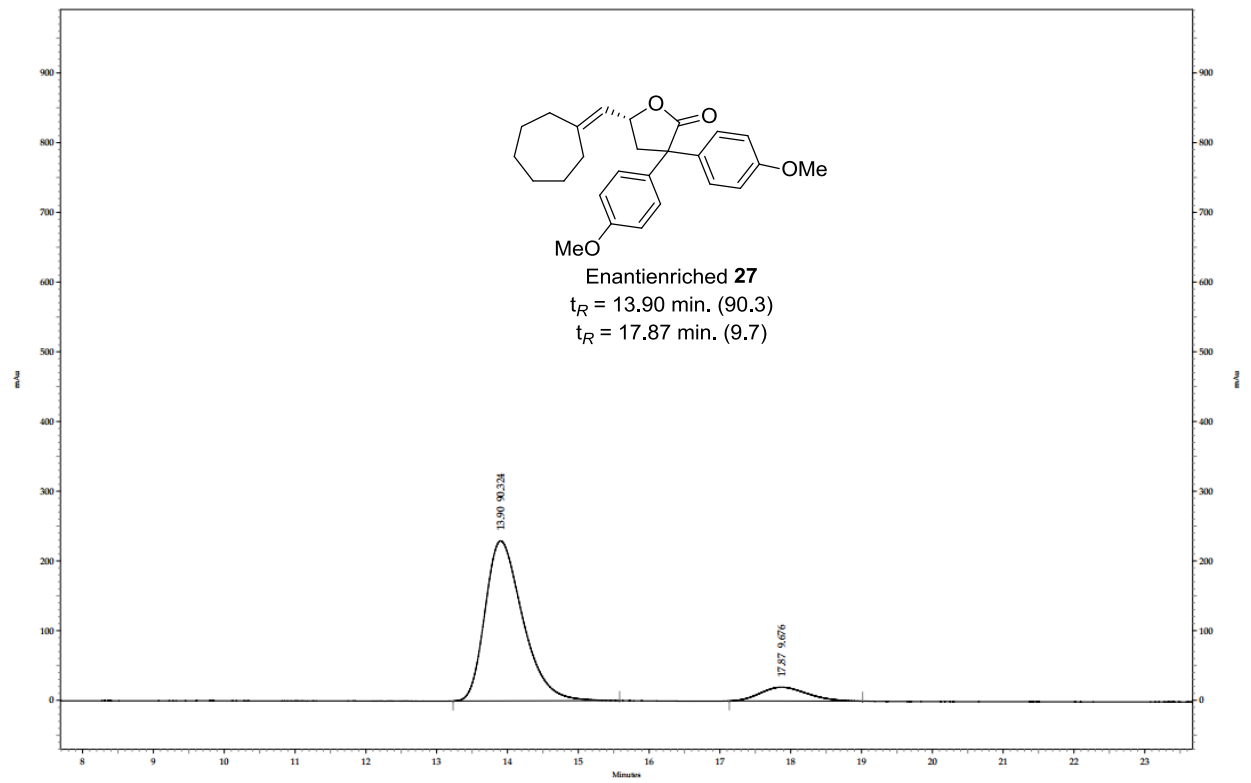

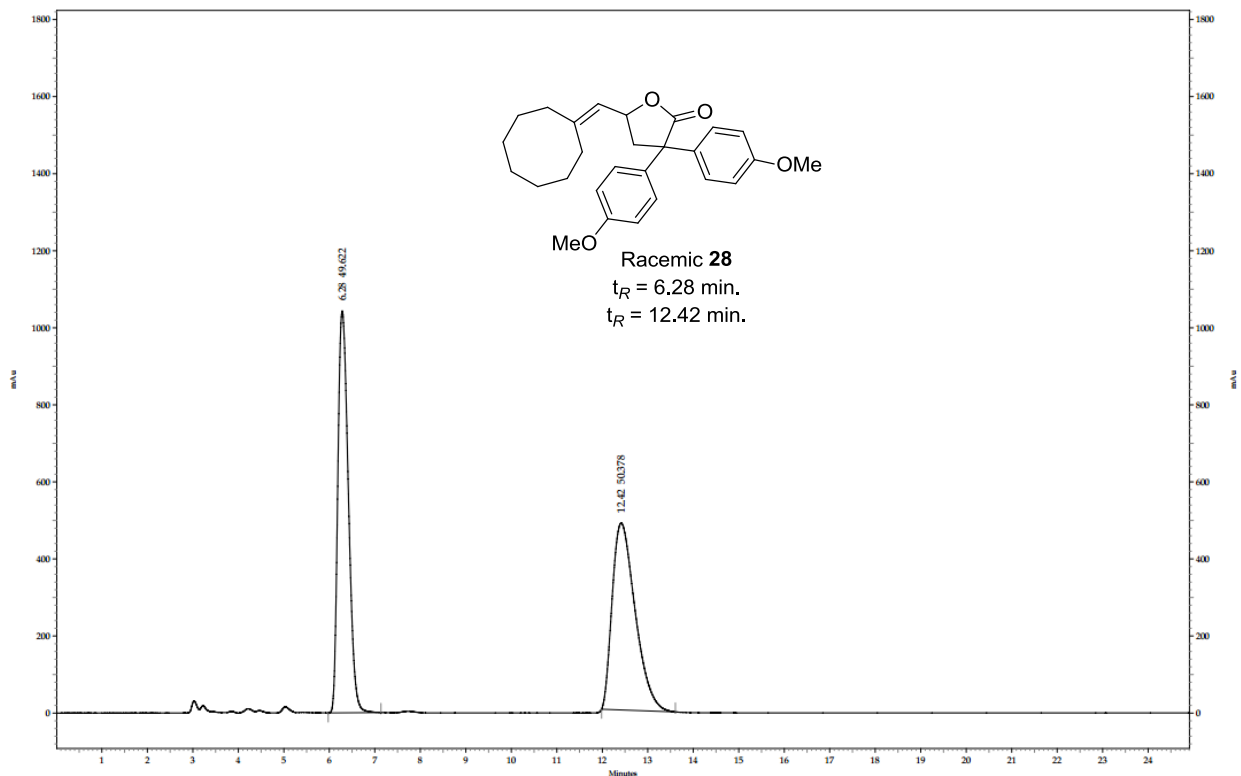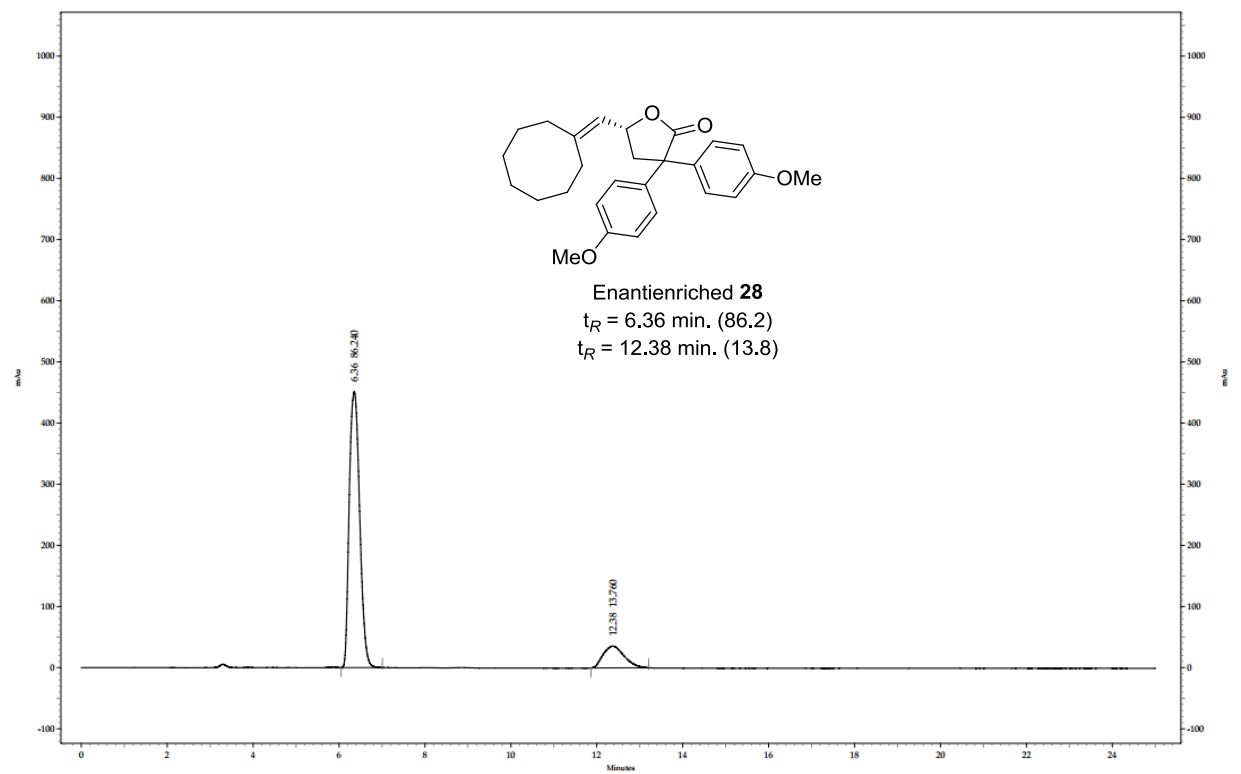

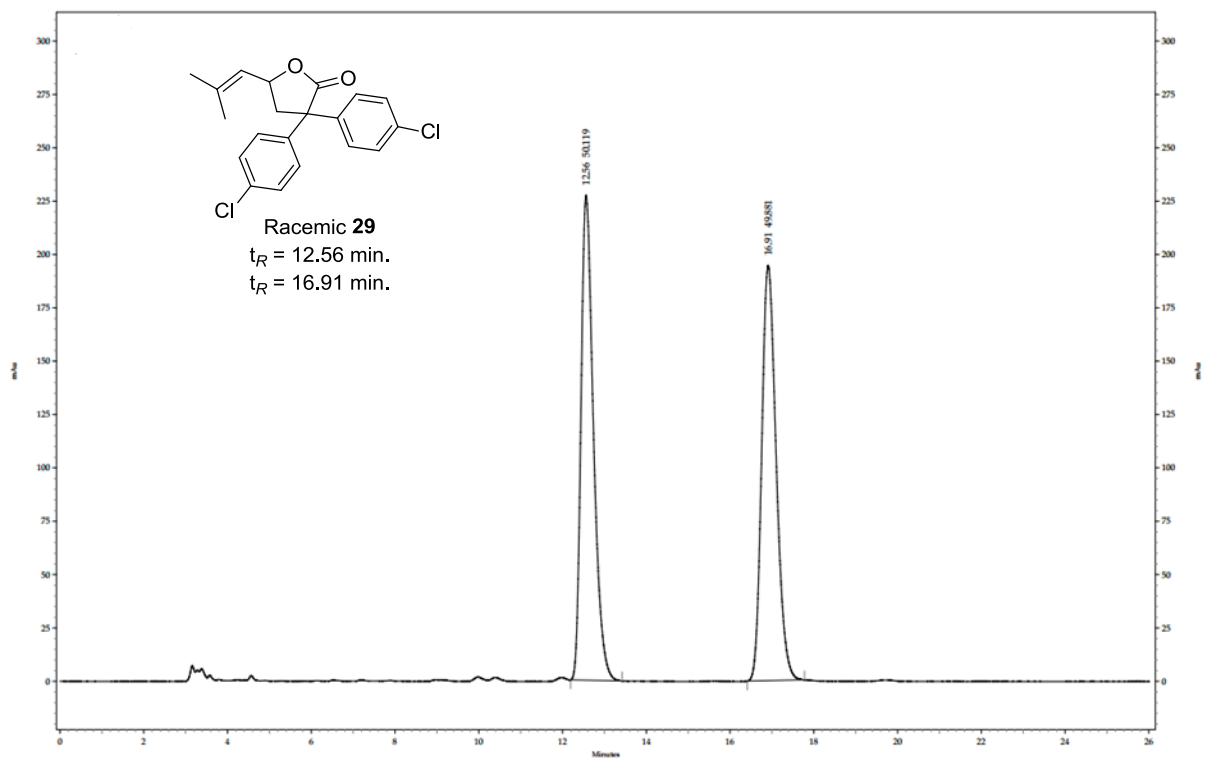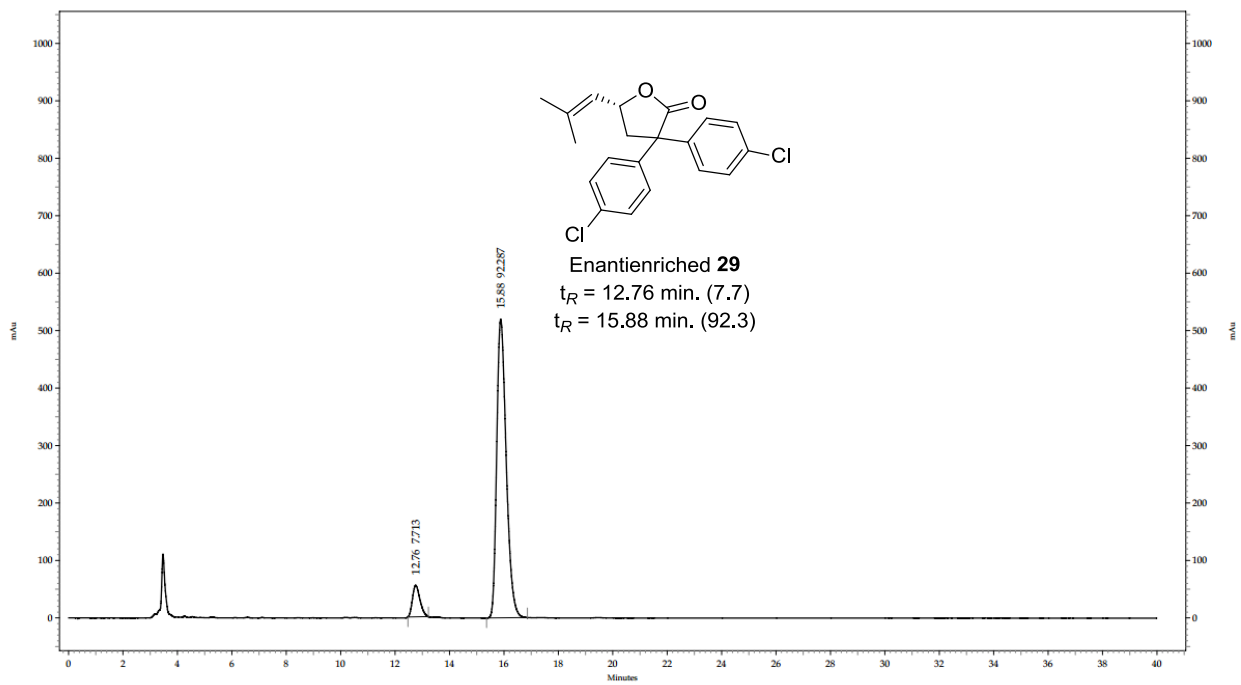

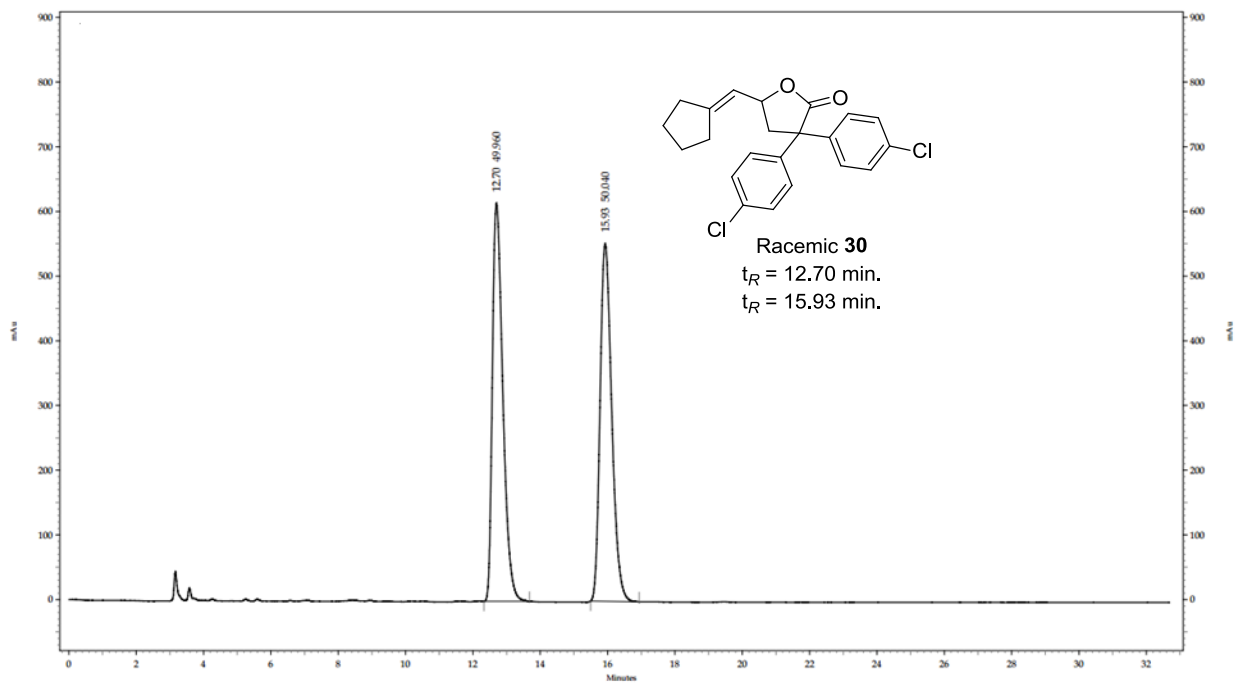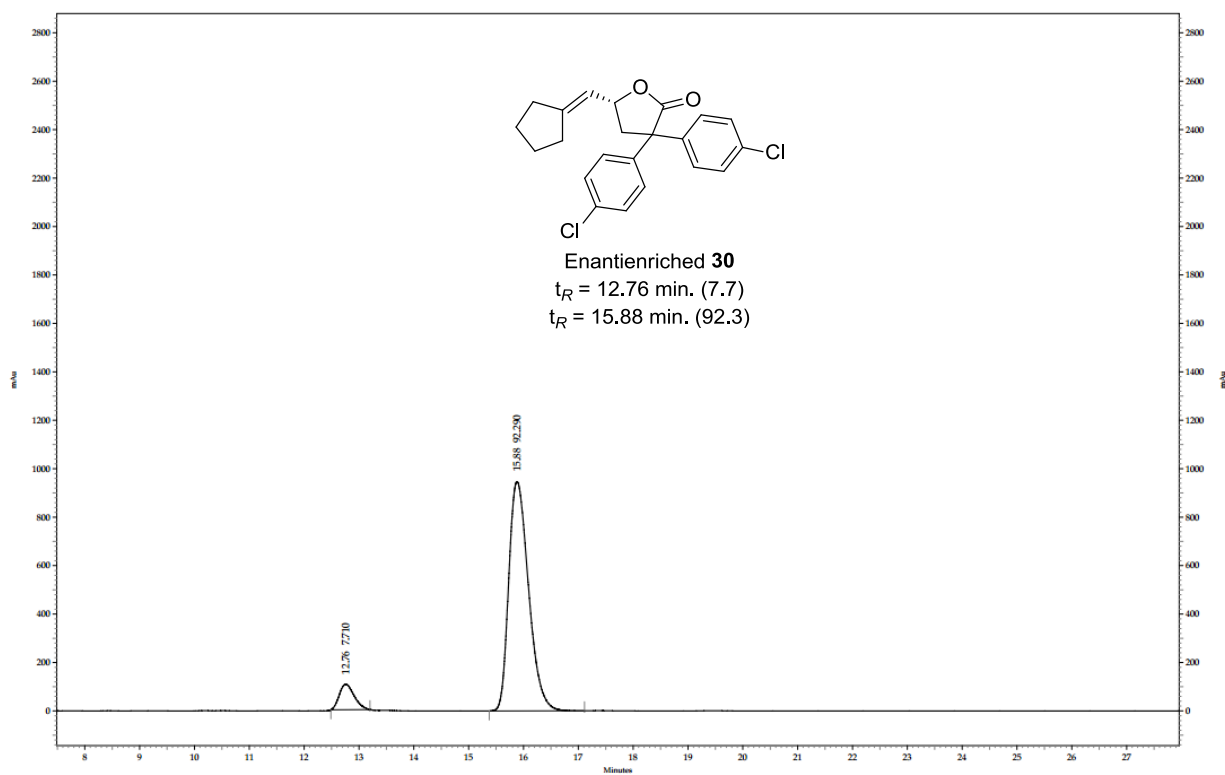

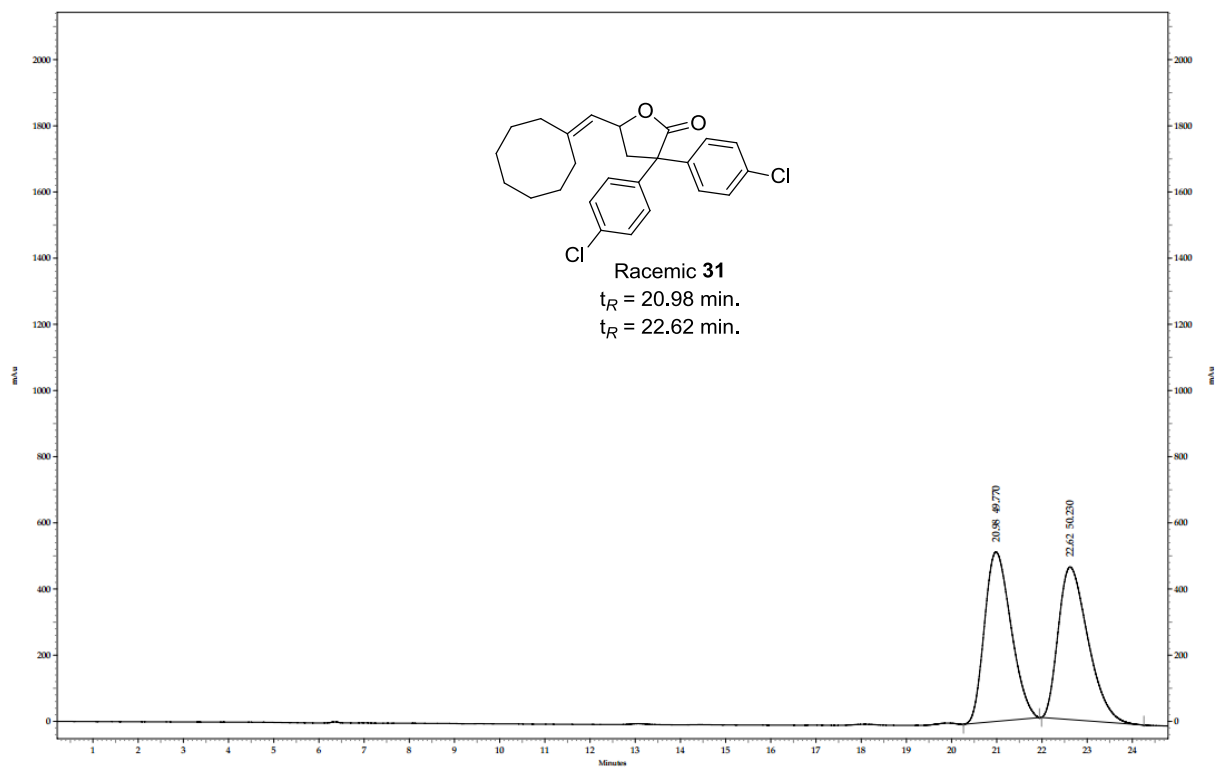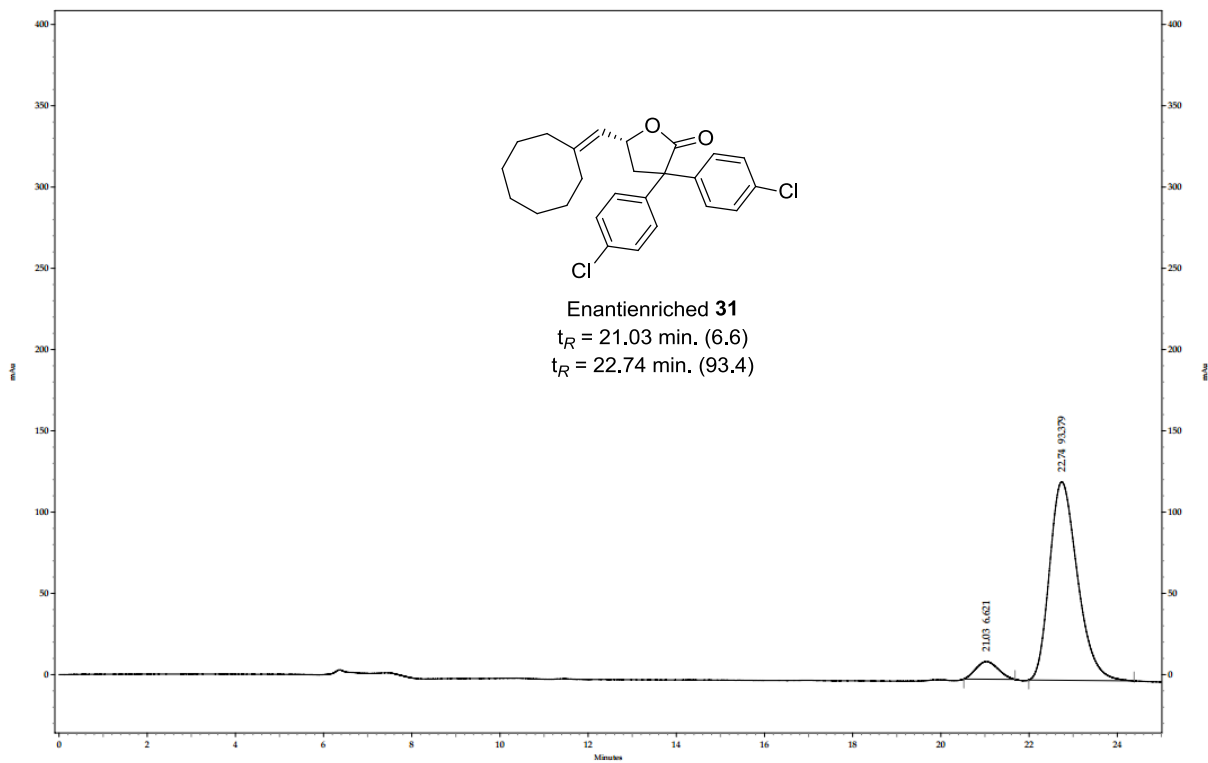

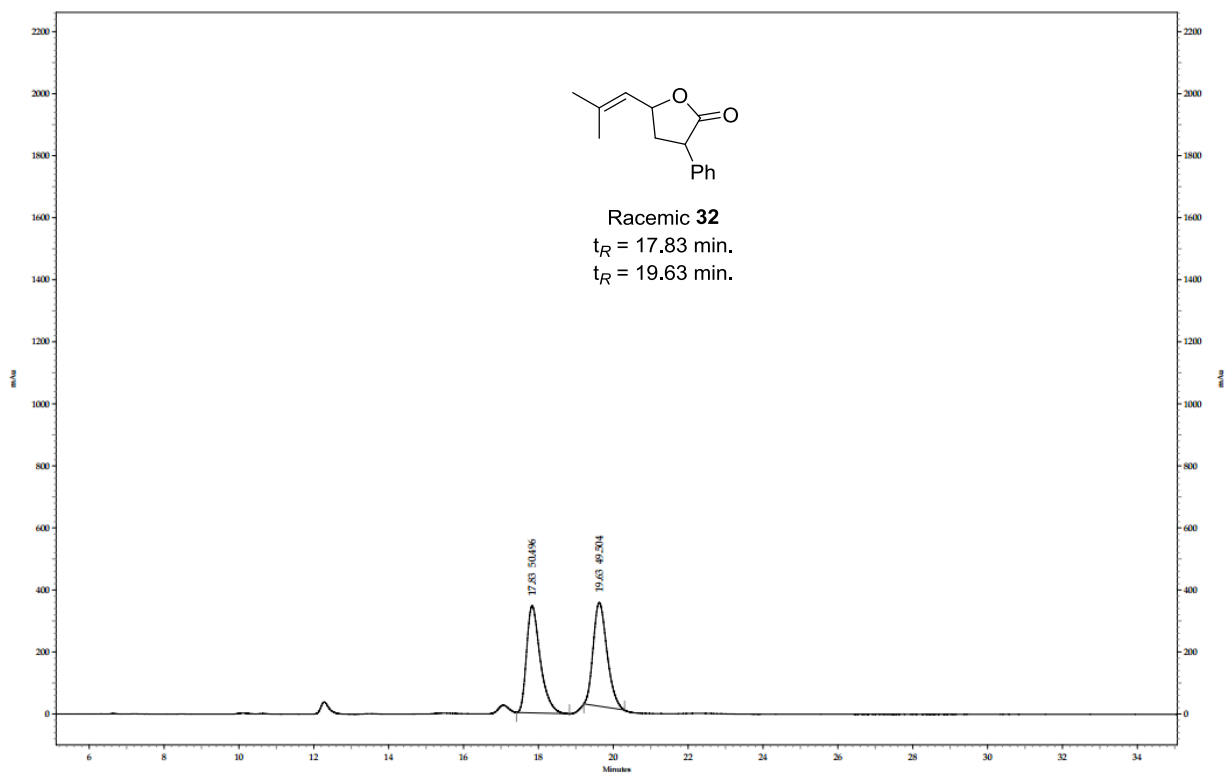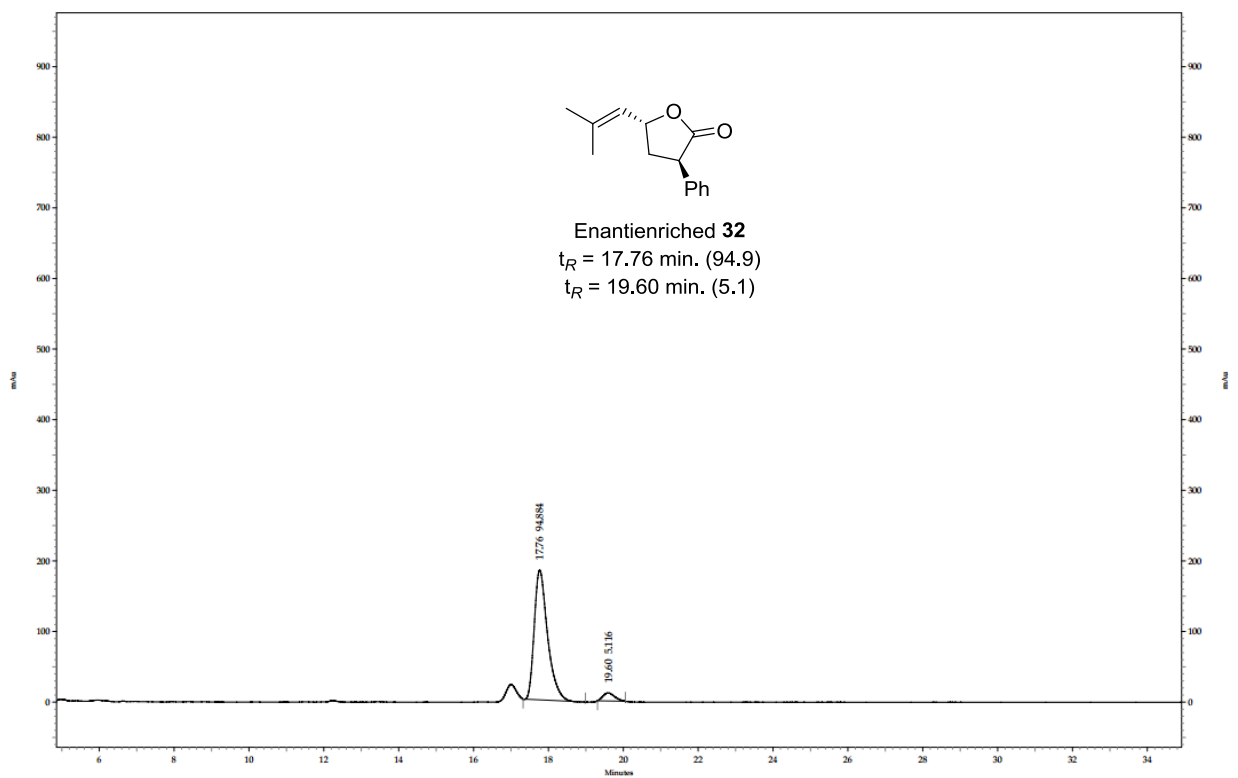



# PART 18: NMR Spectra

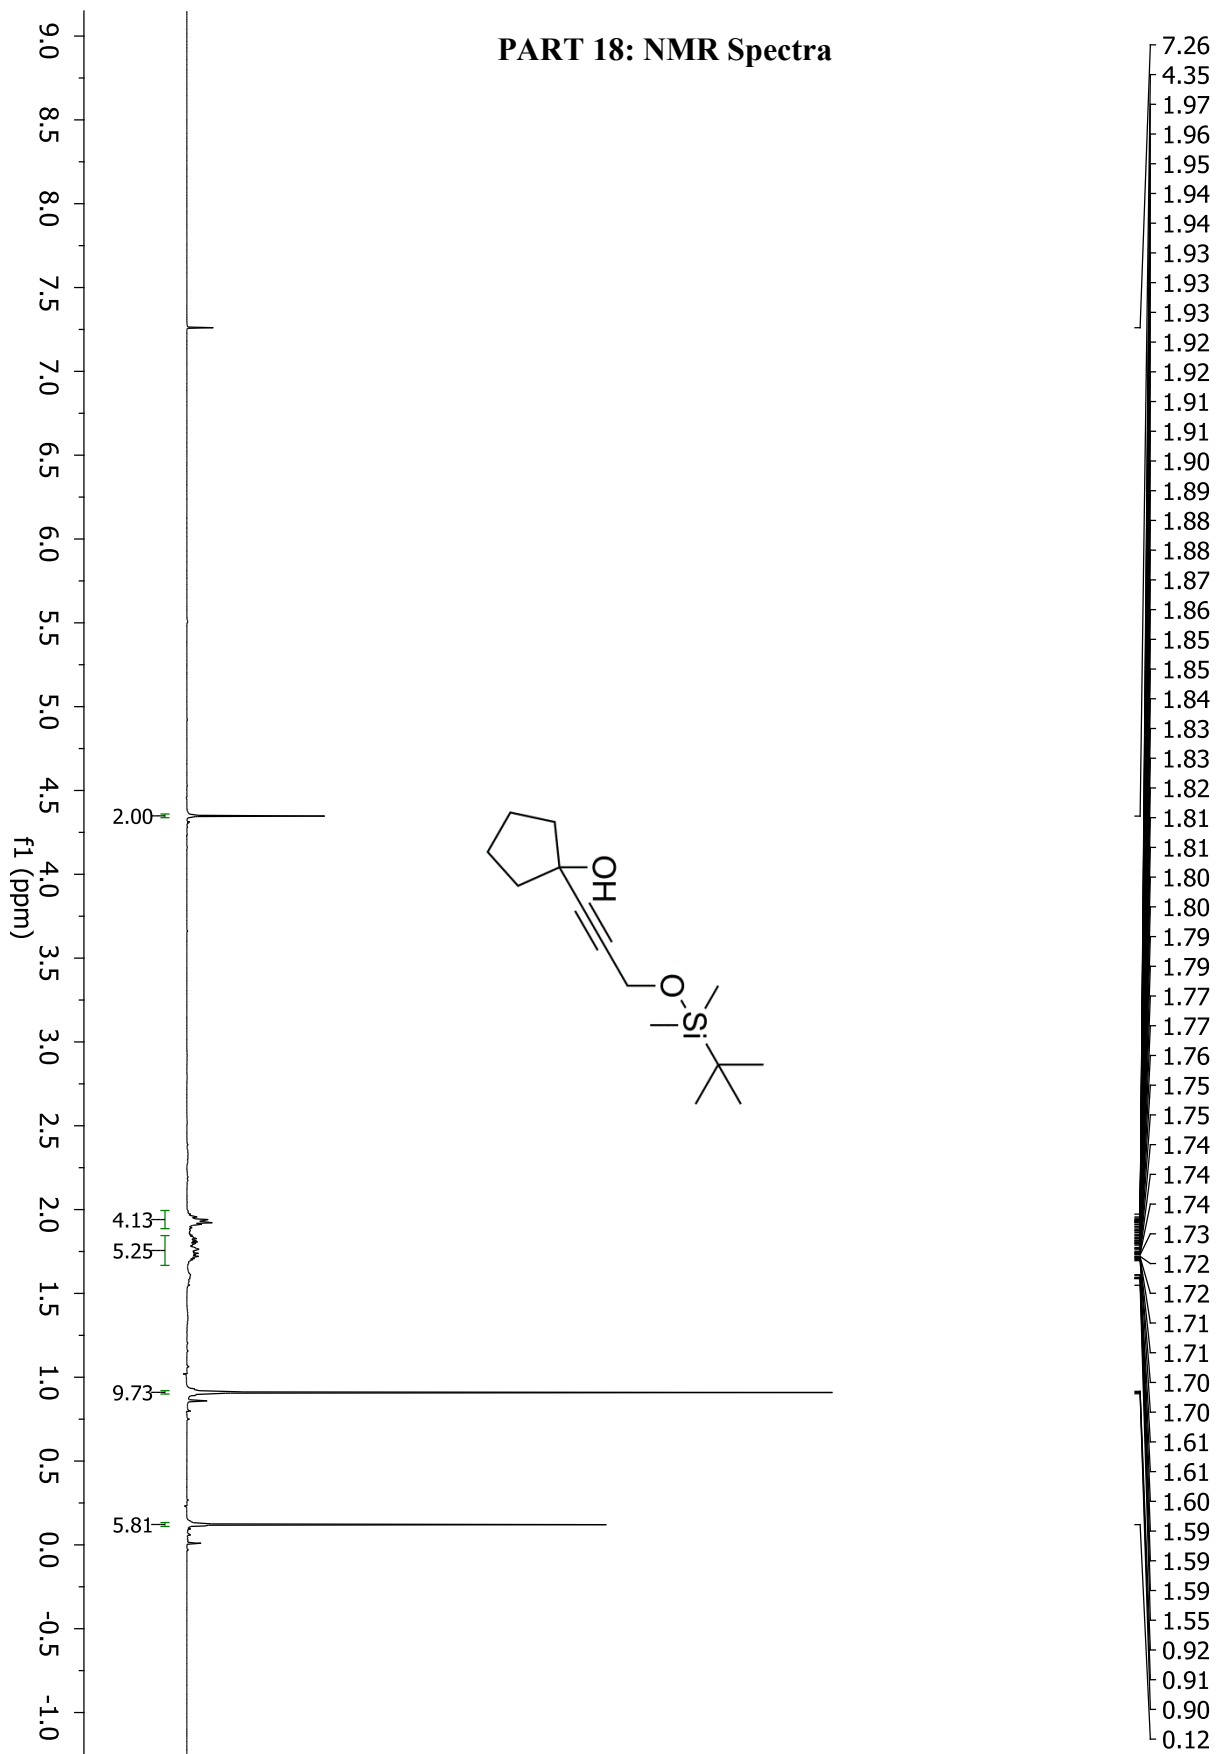

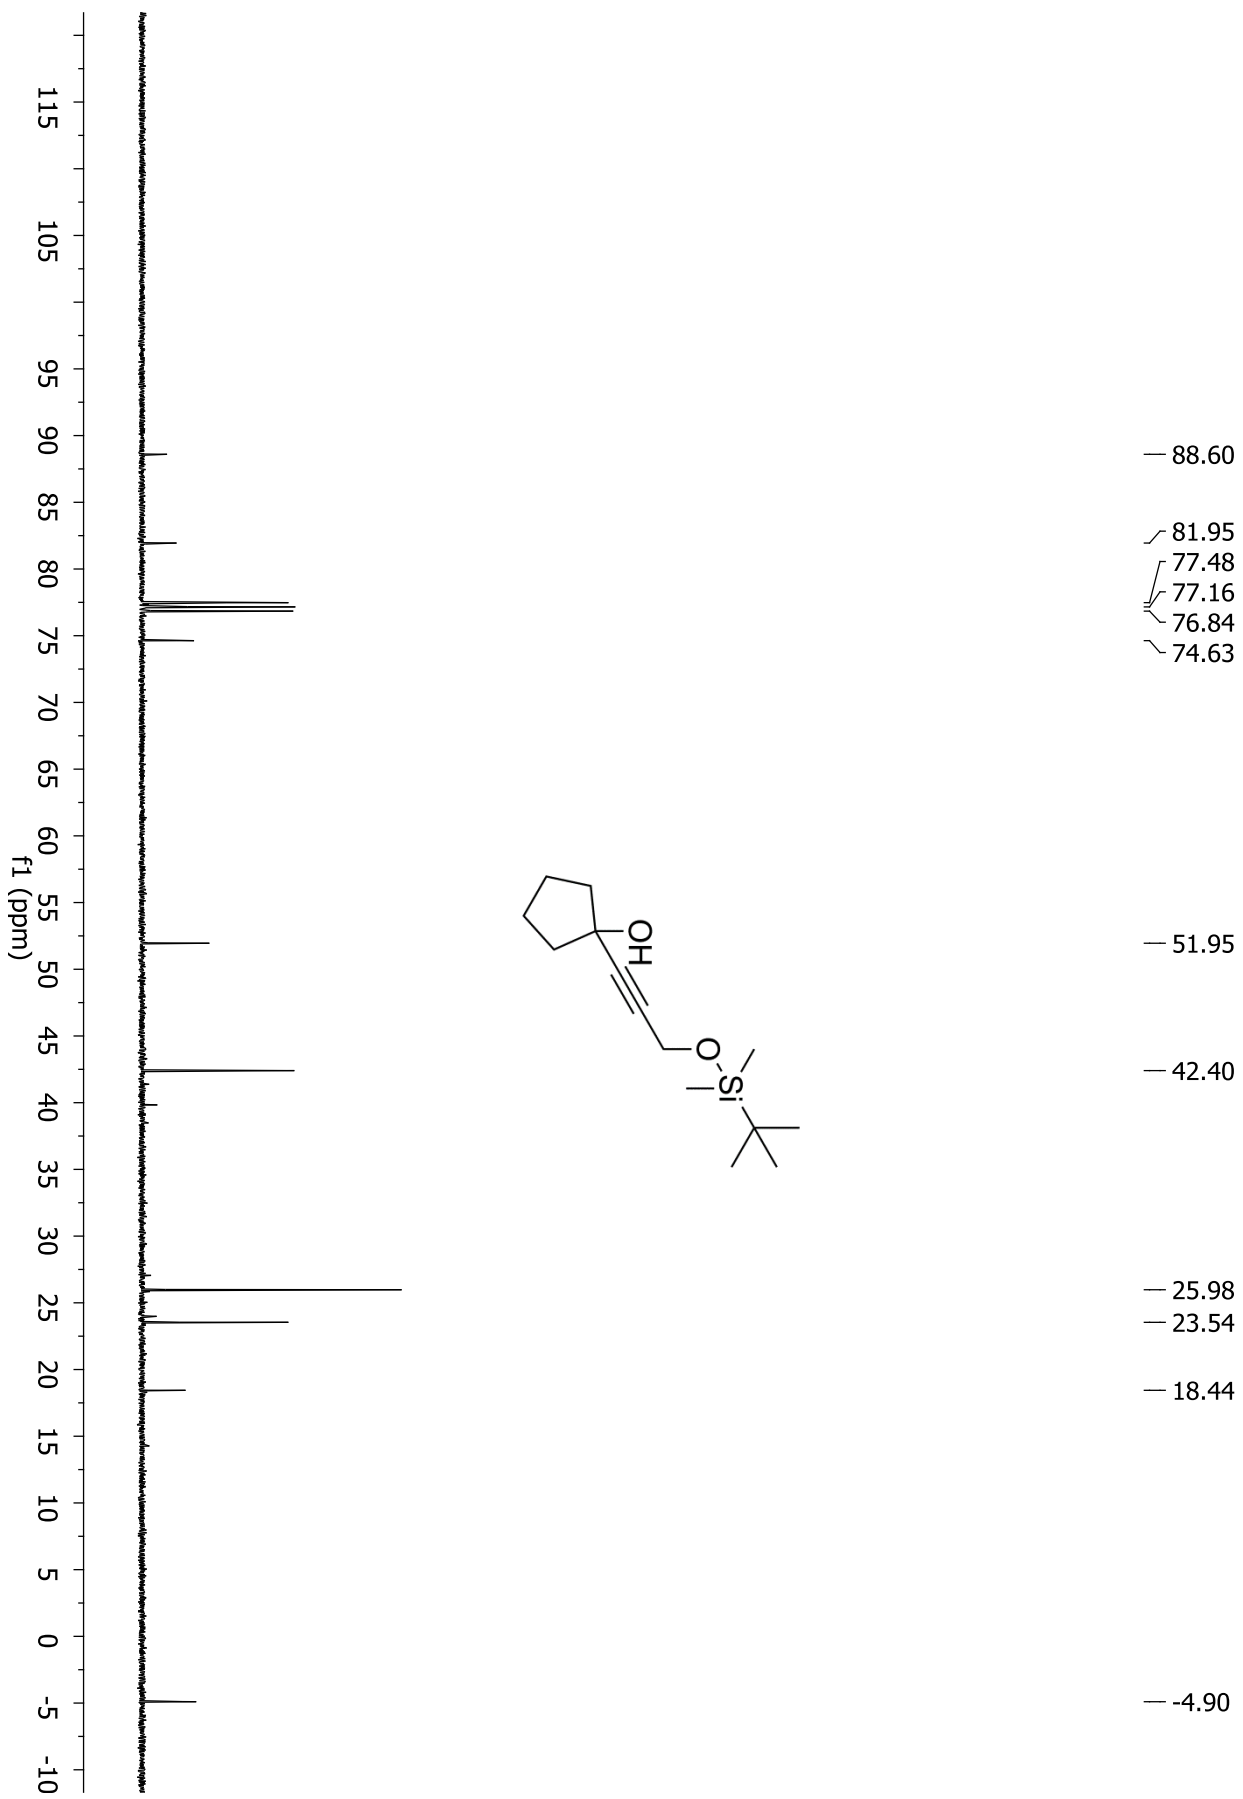

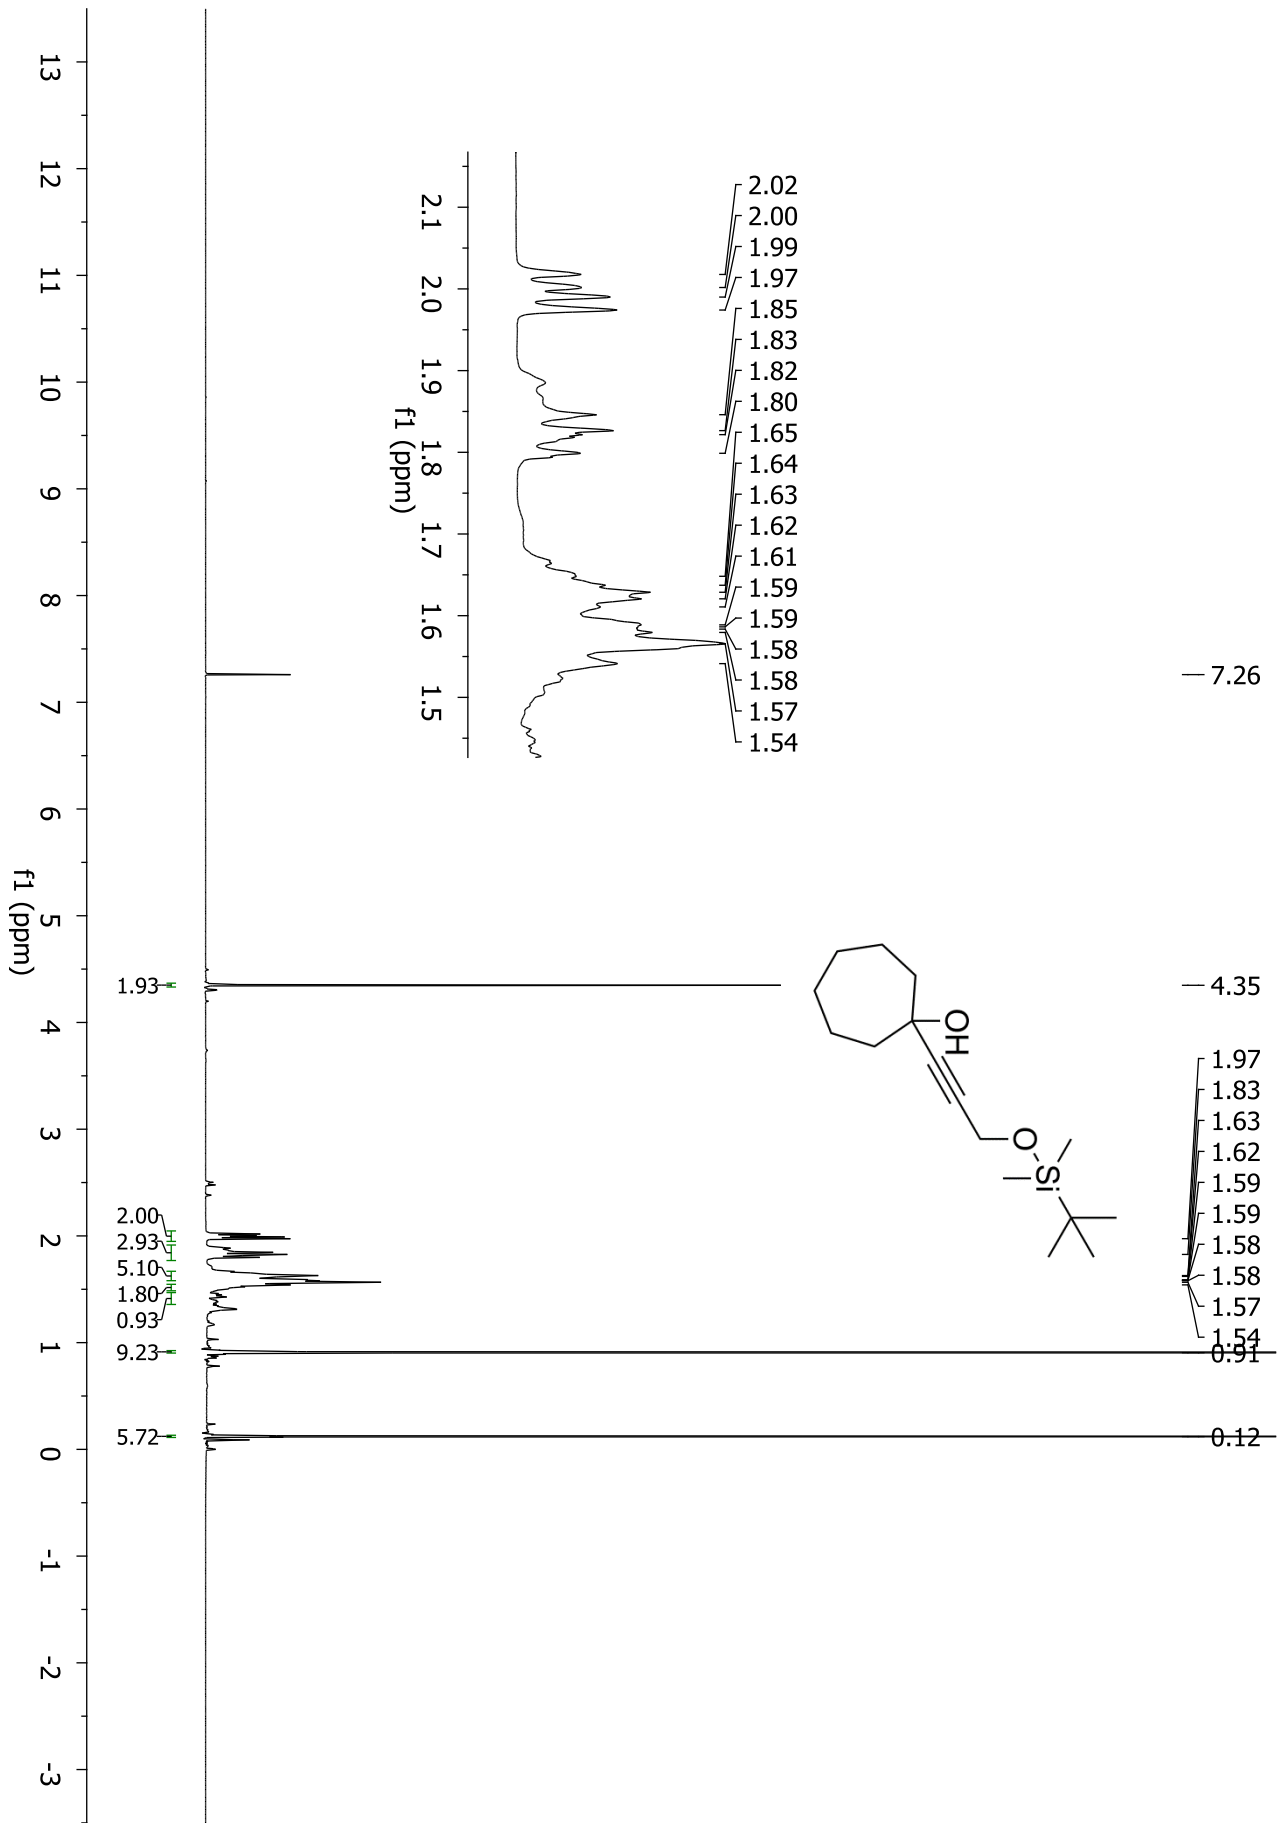

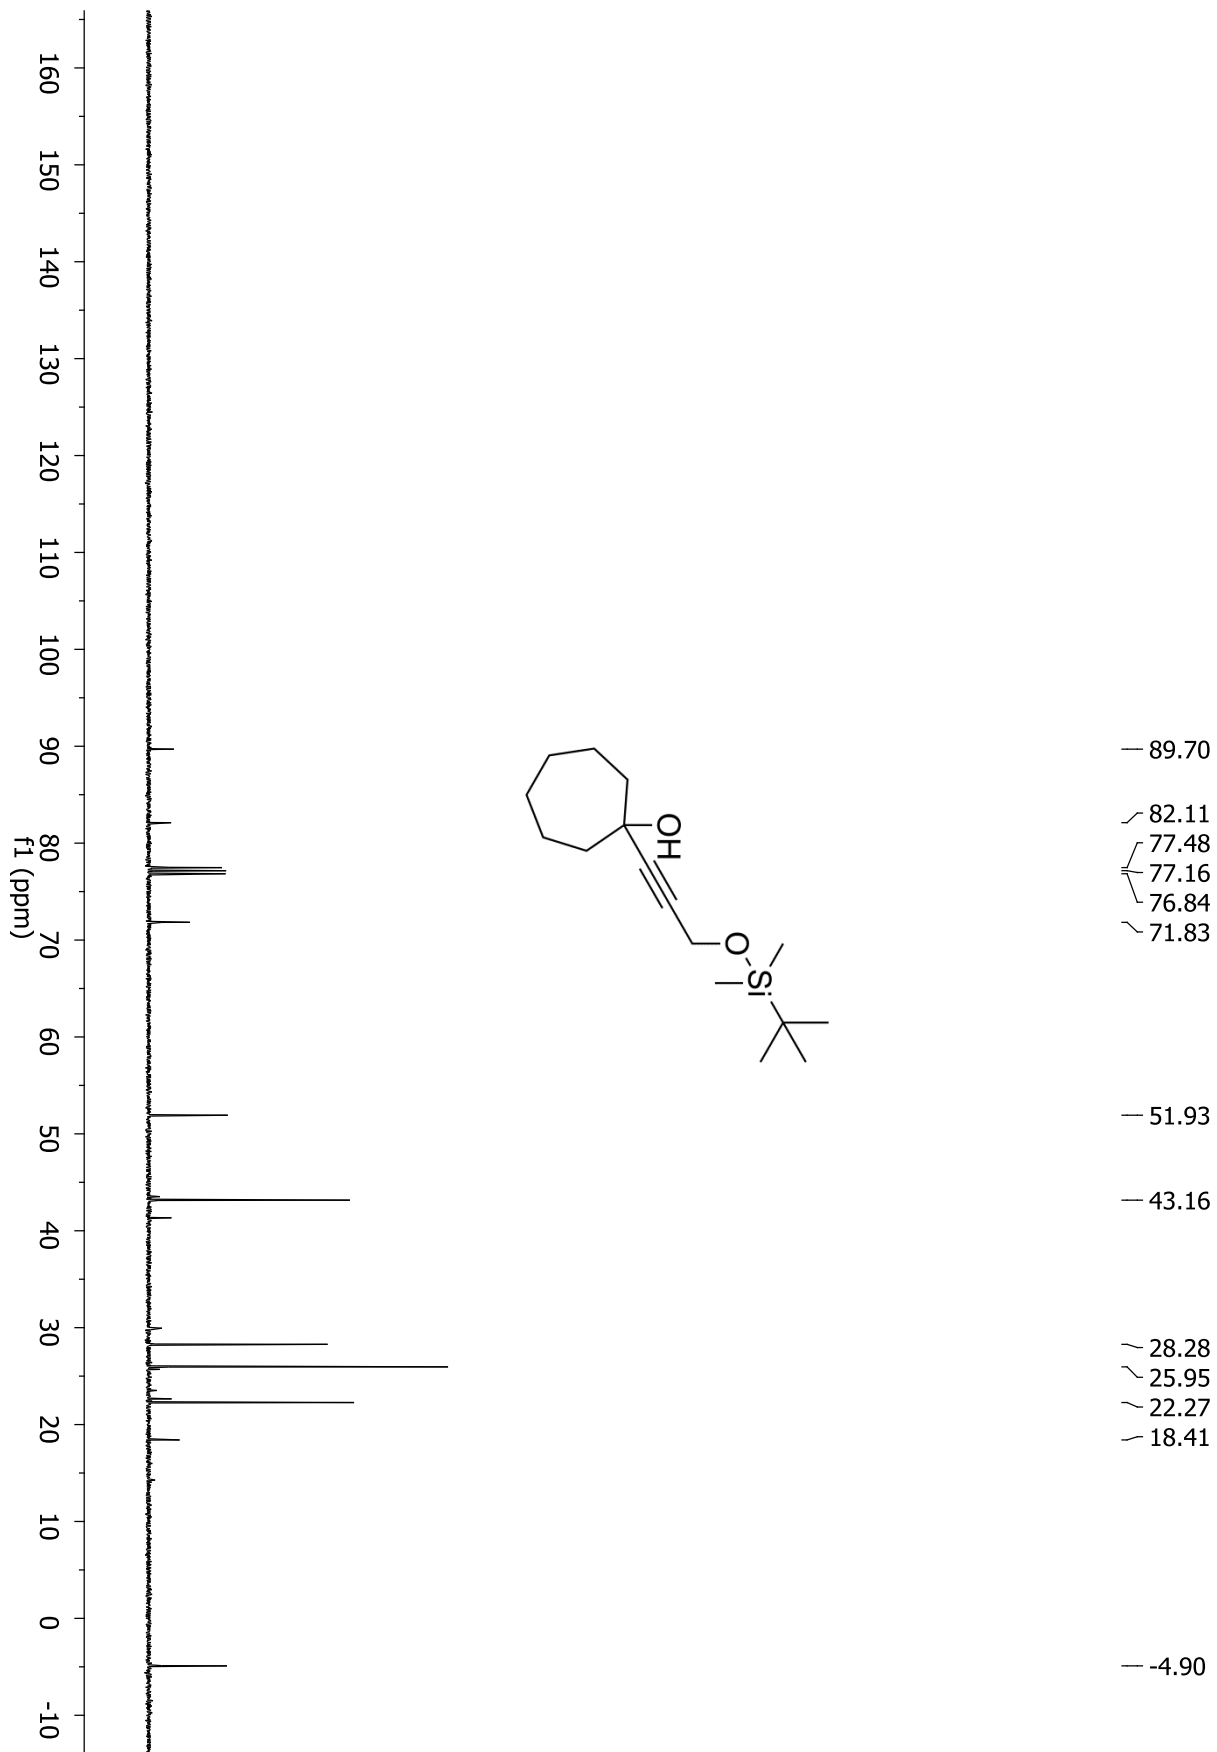

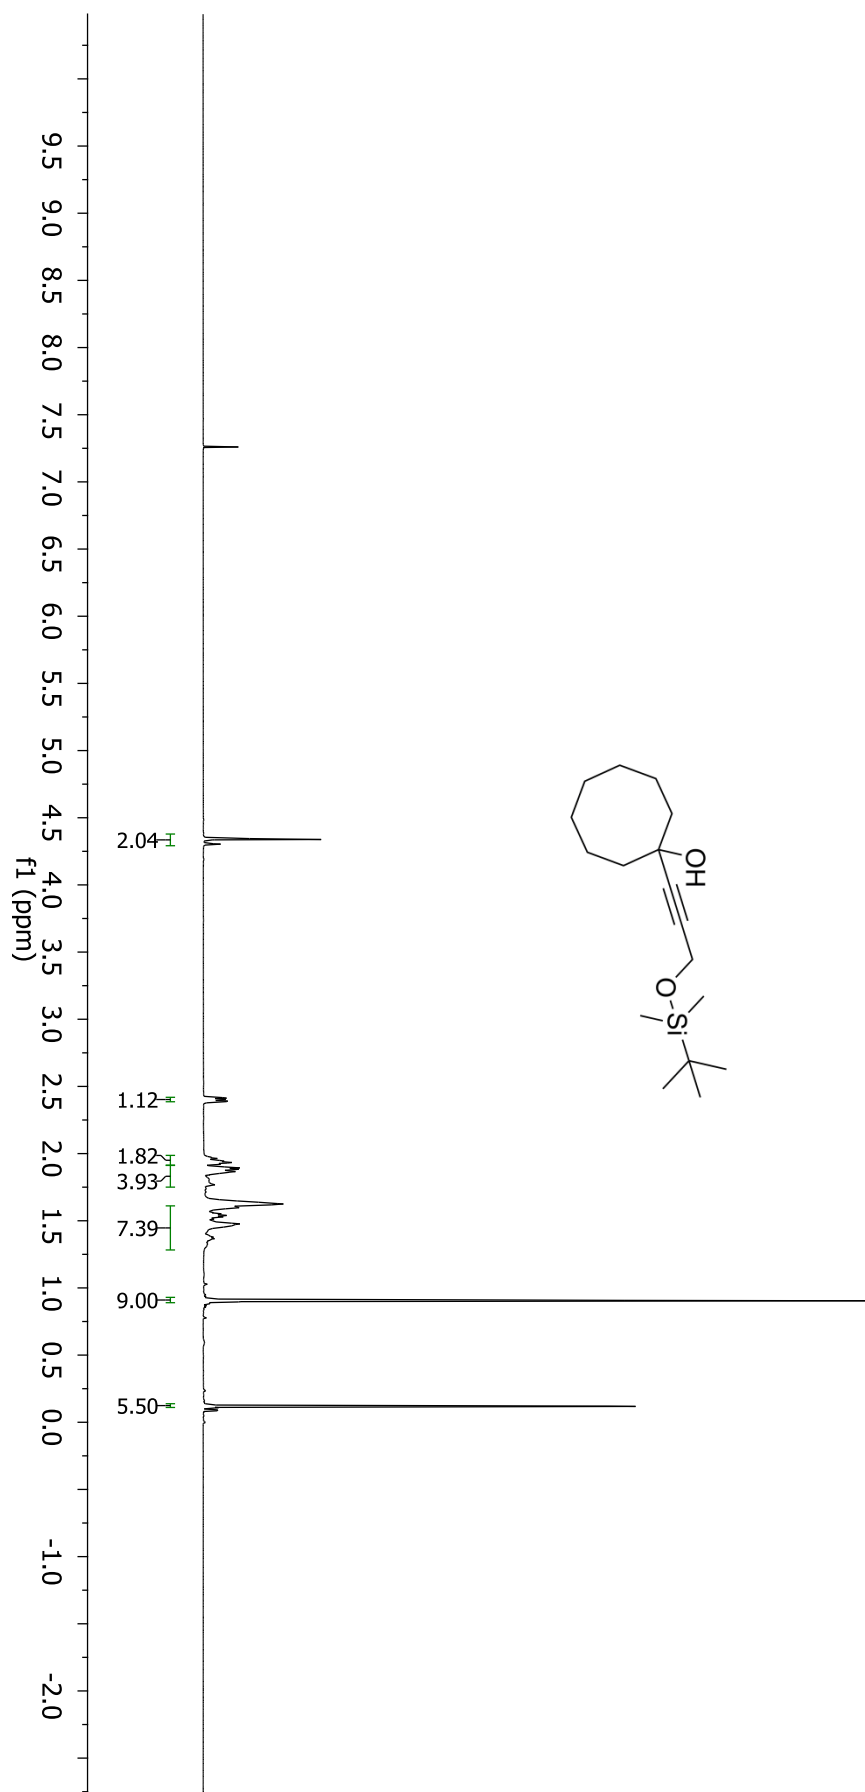

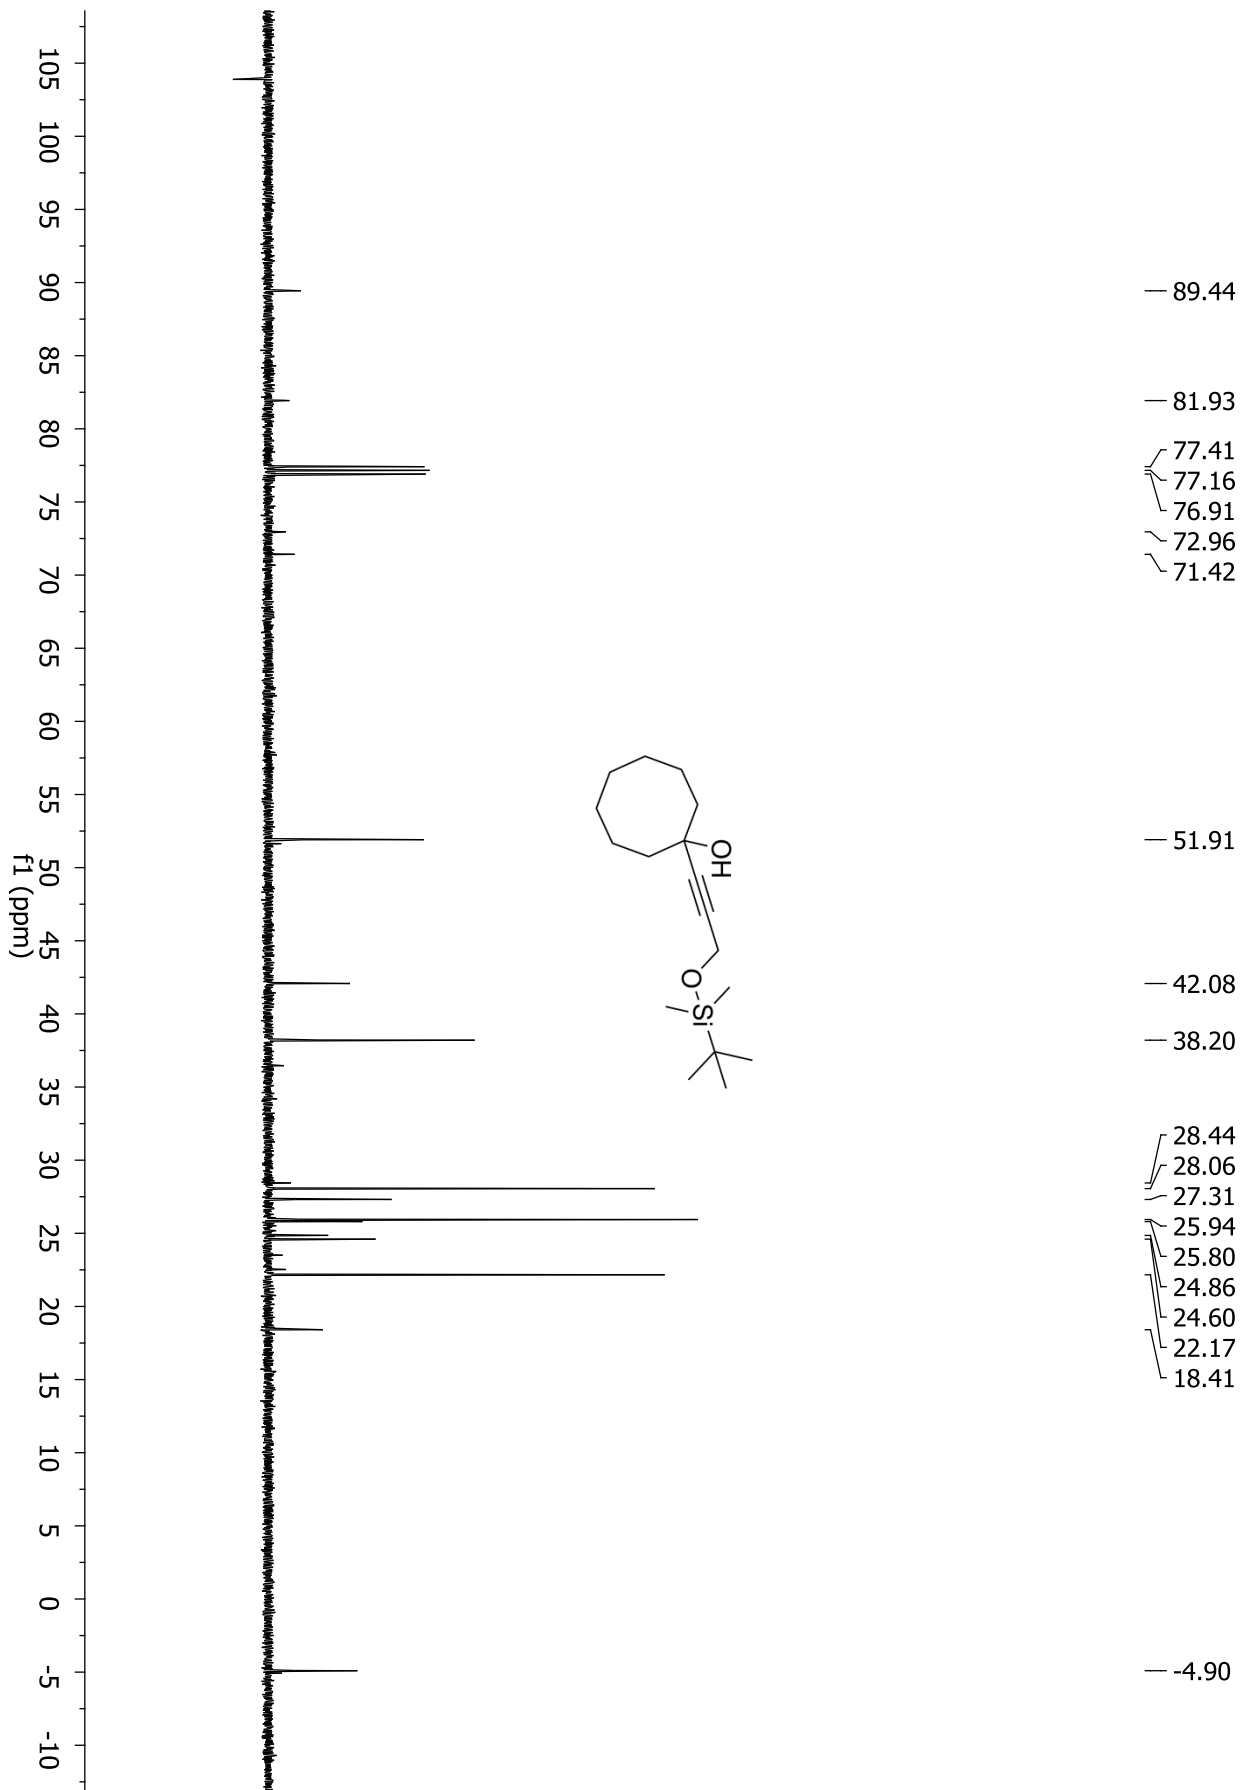

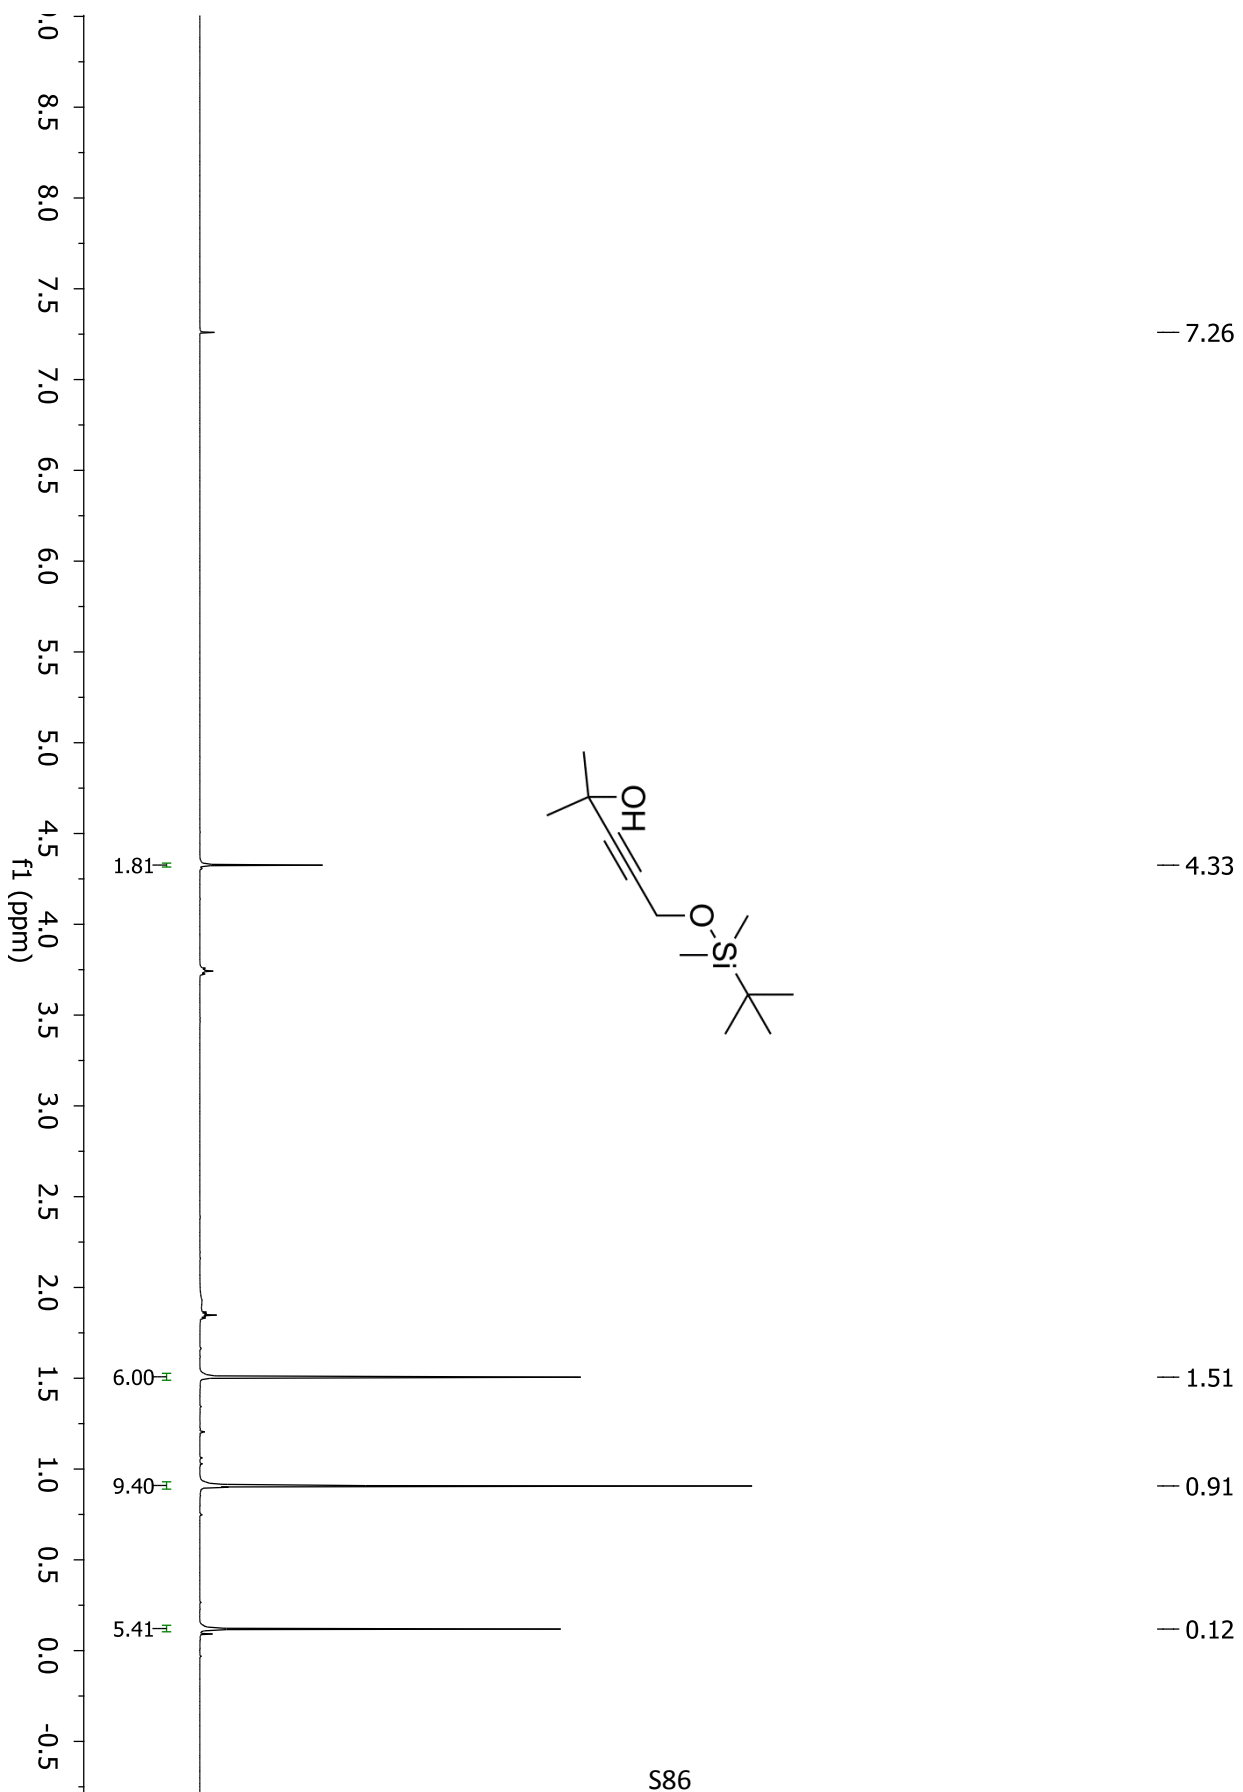

S86

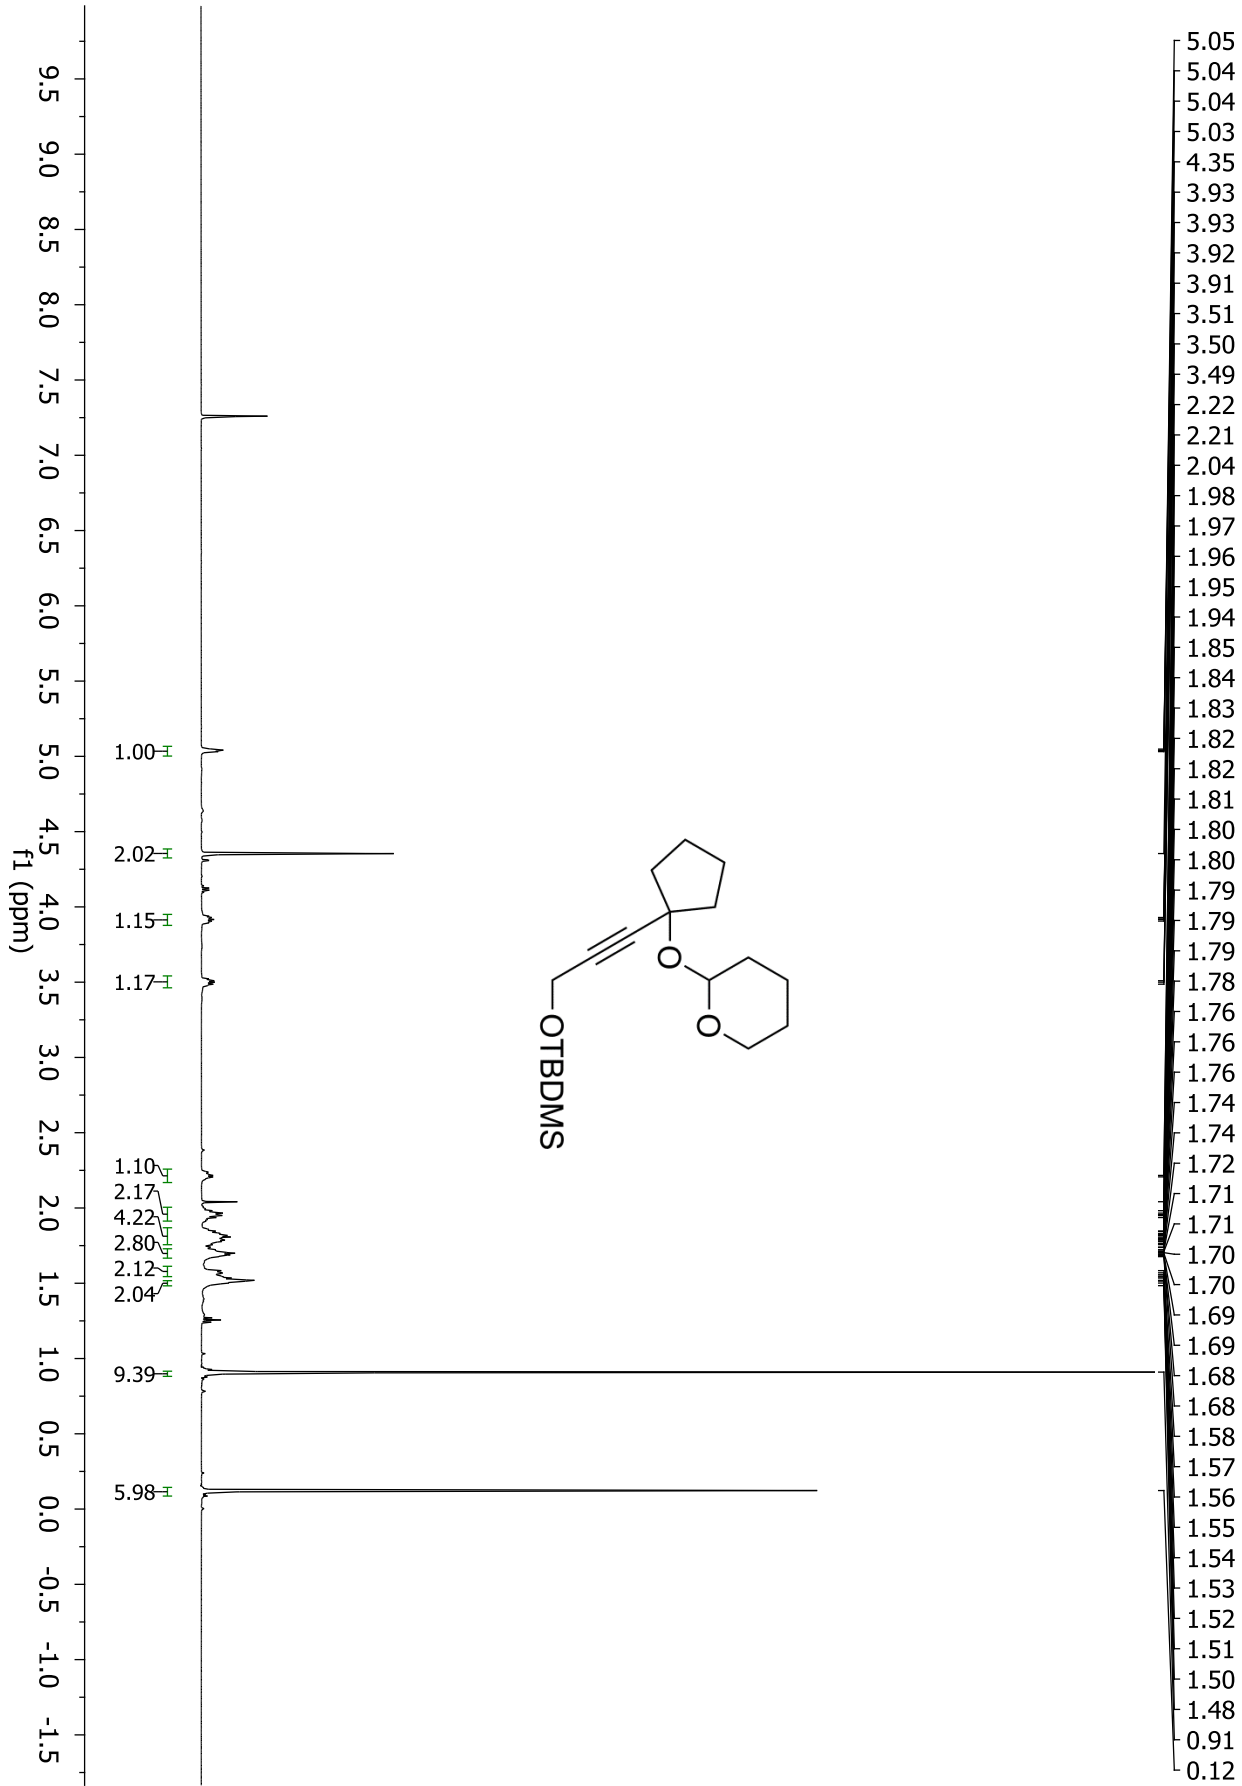



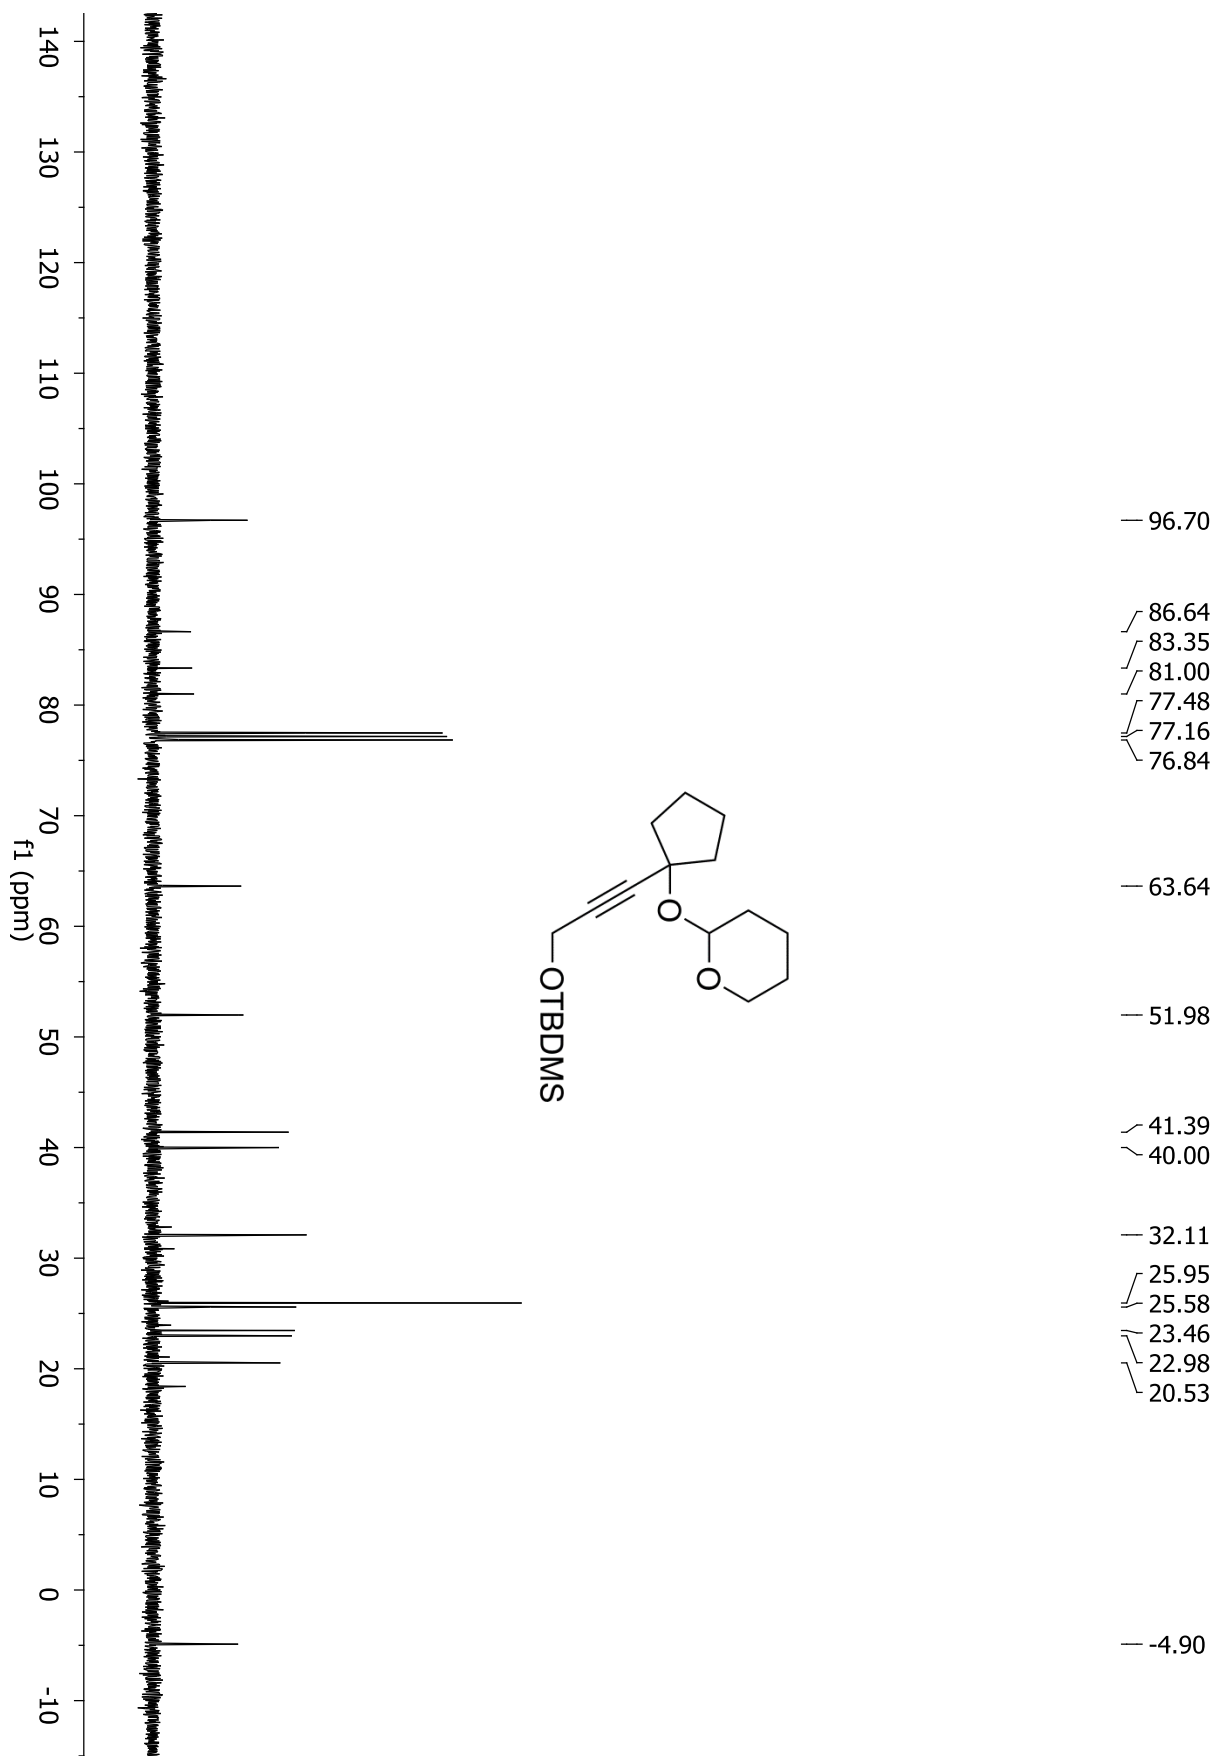

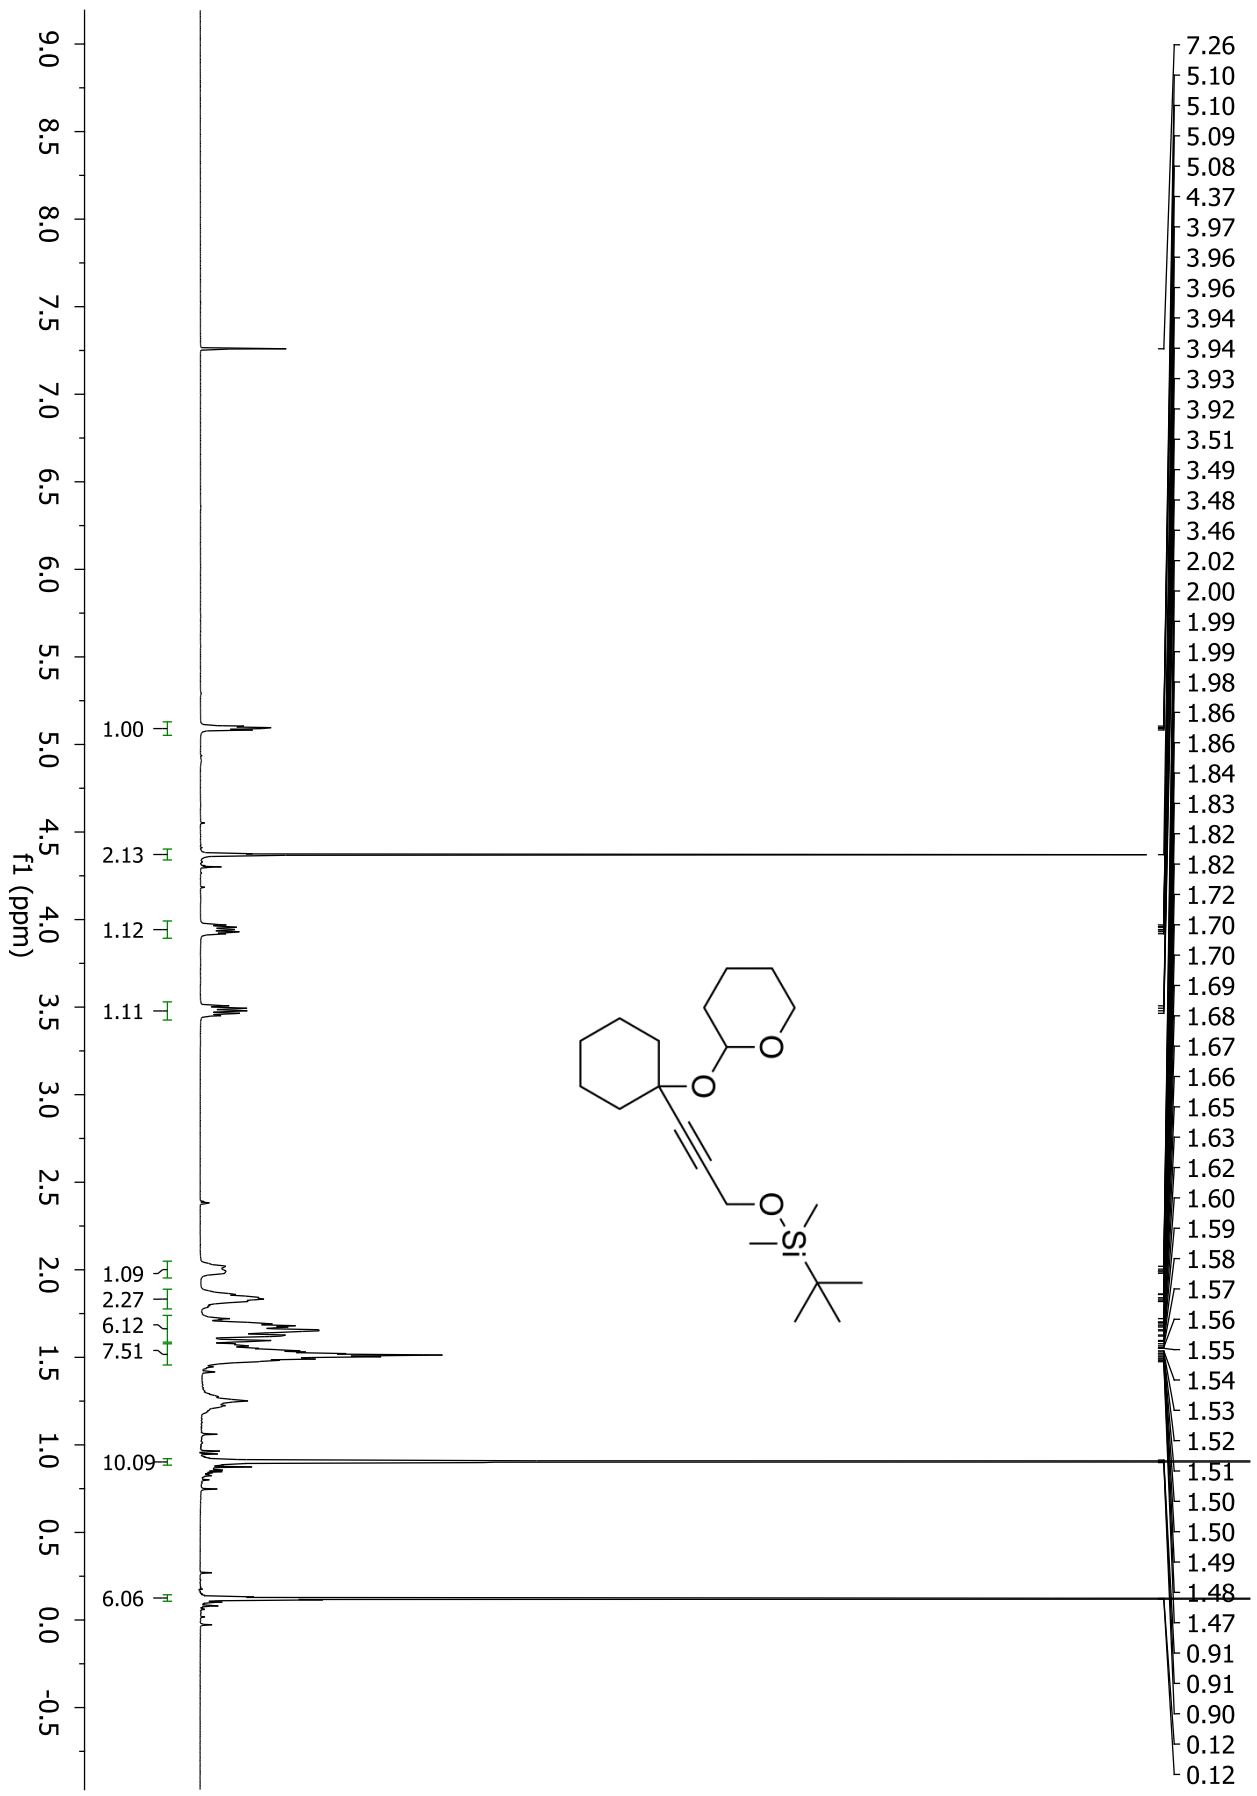

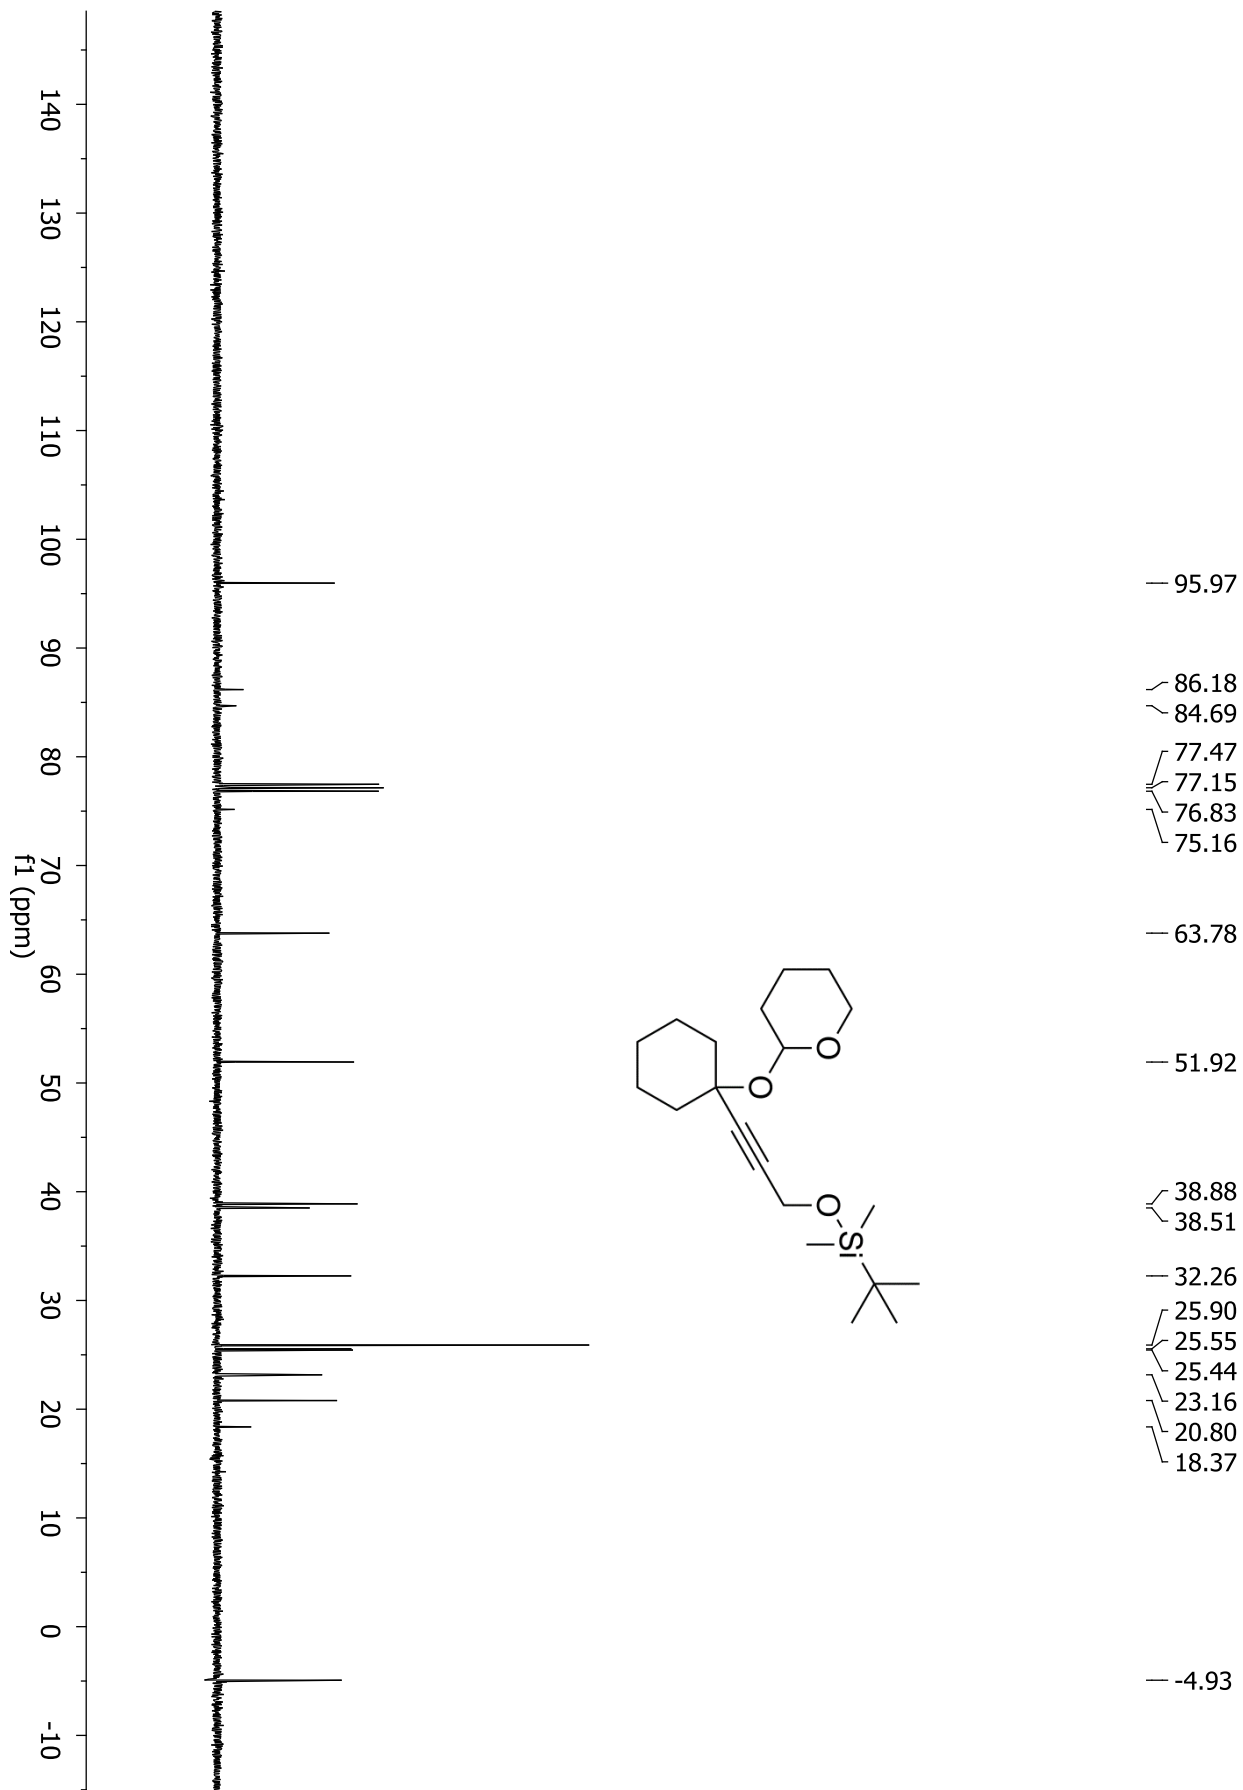

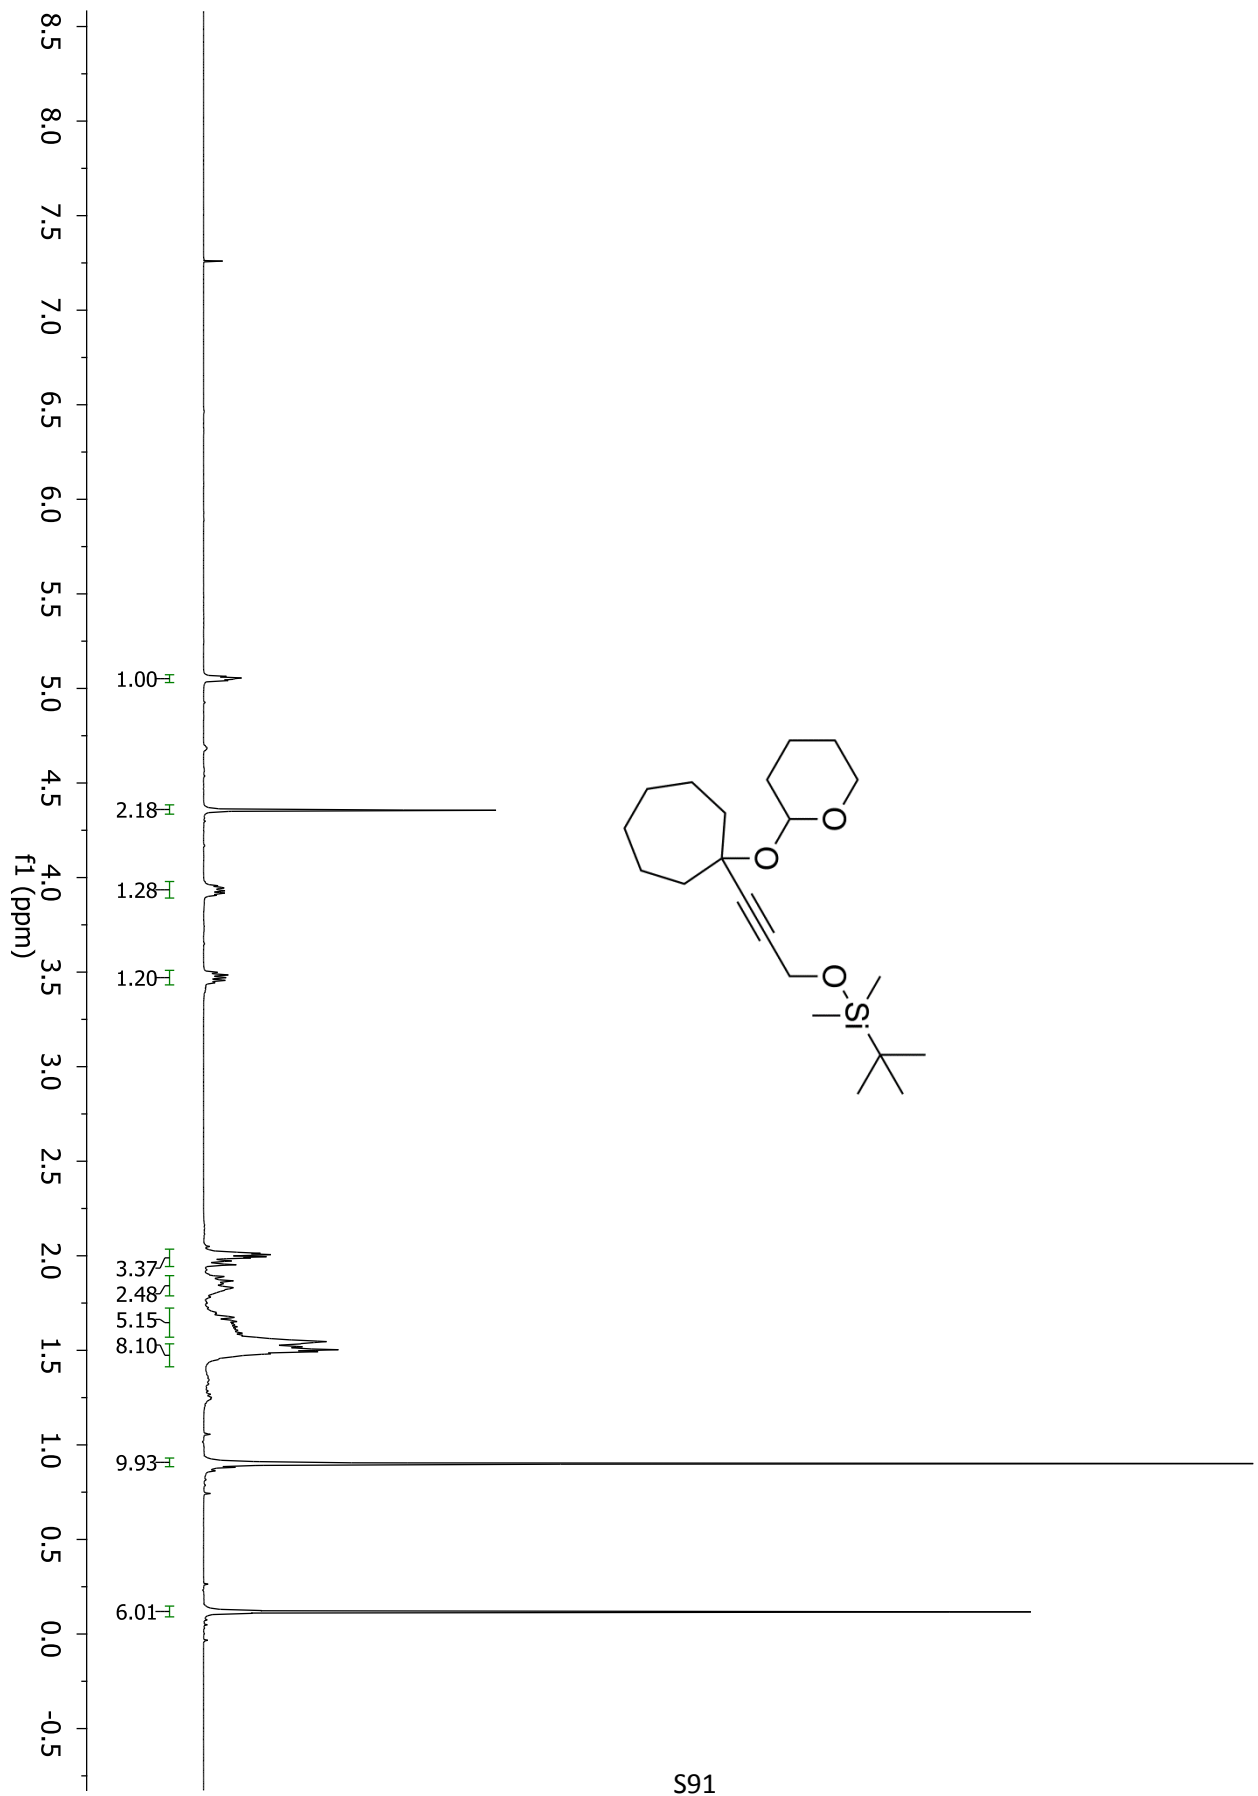

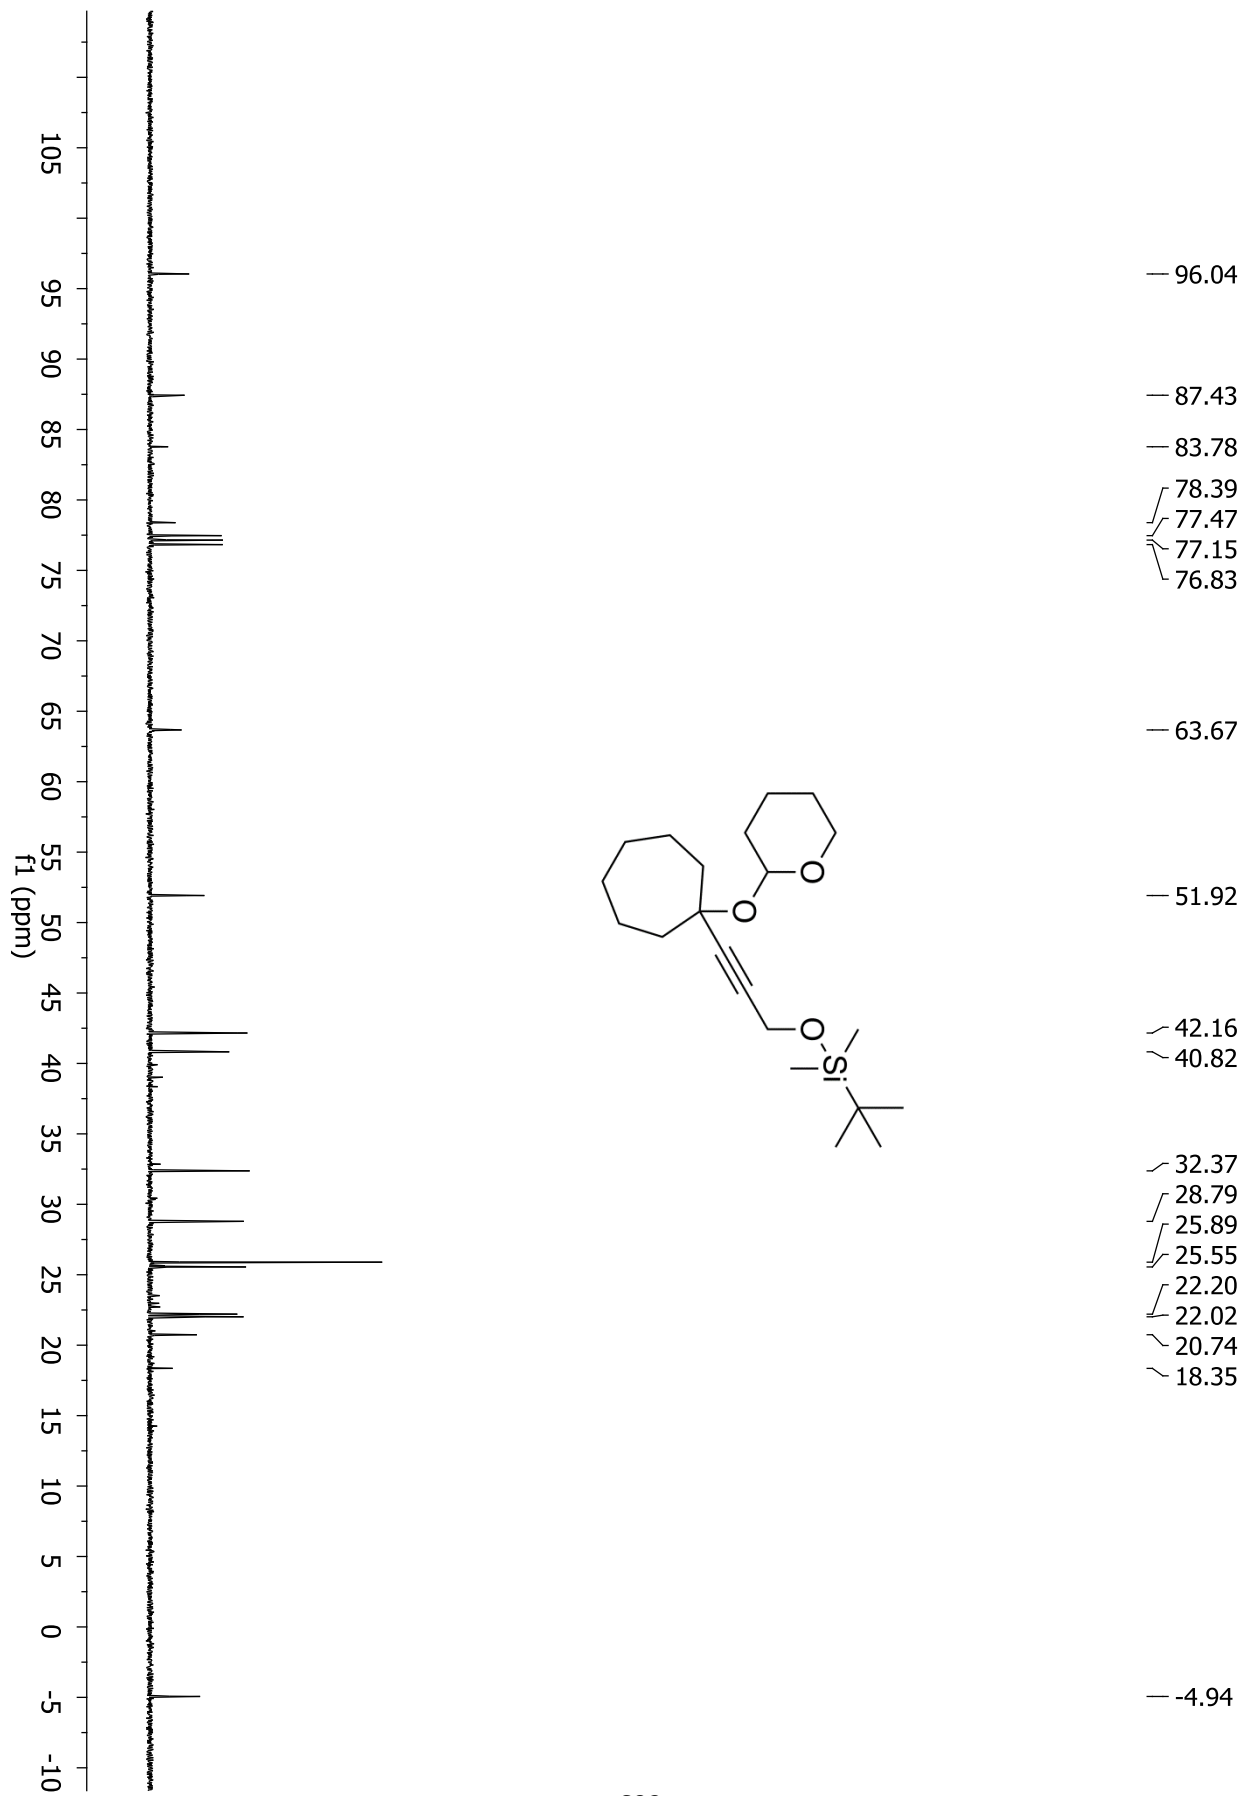

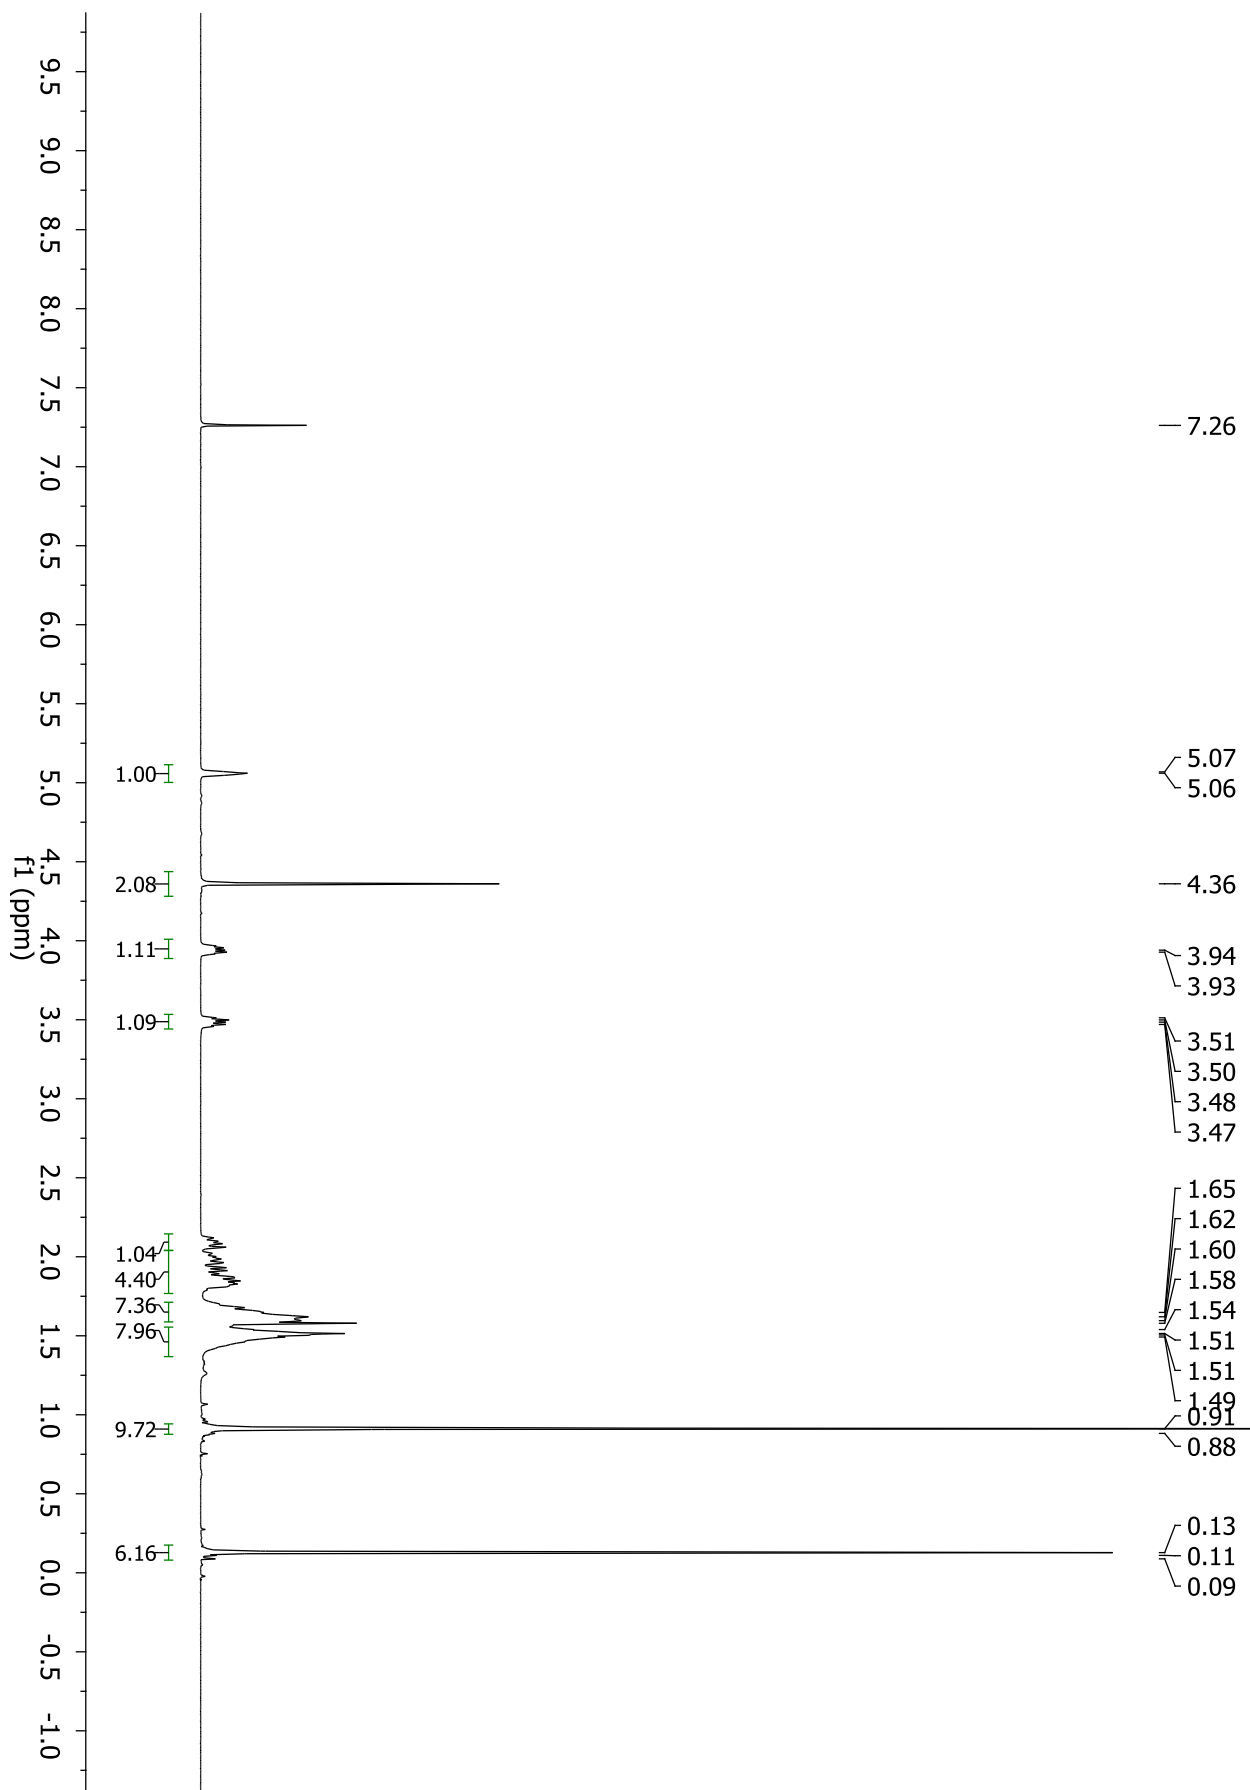

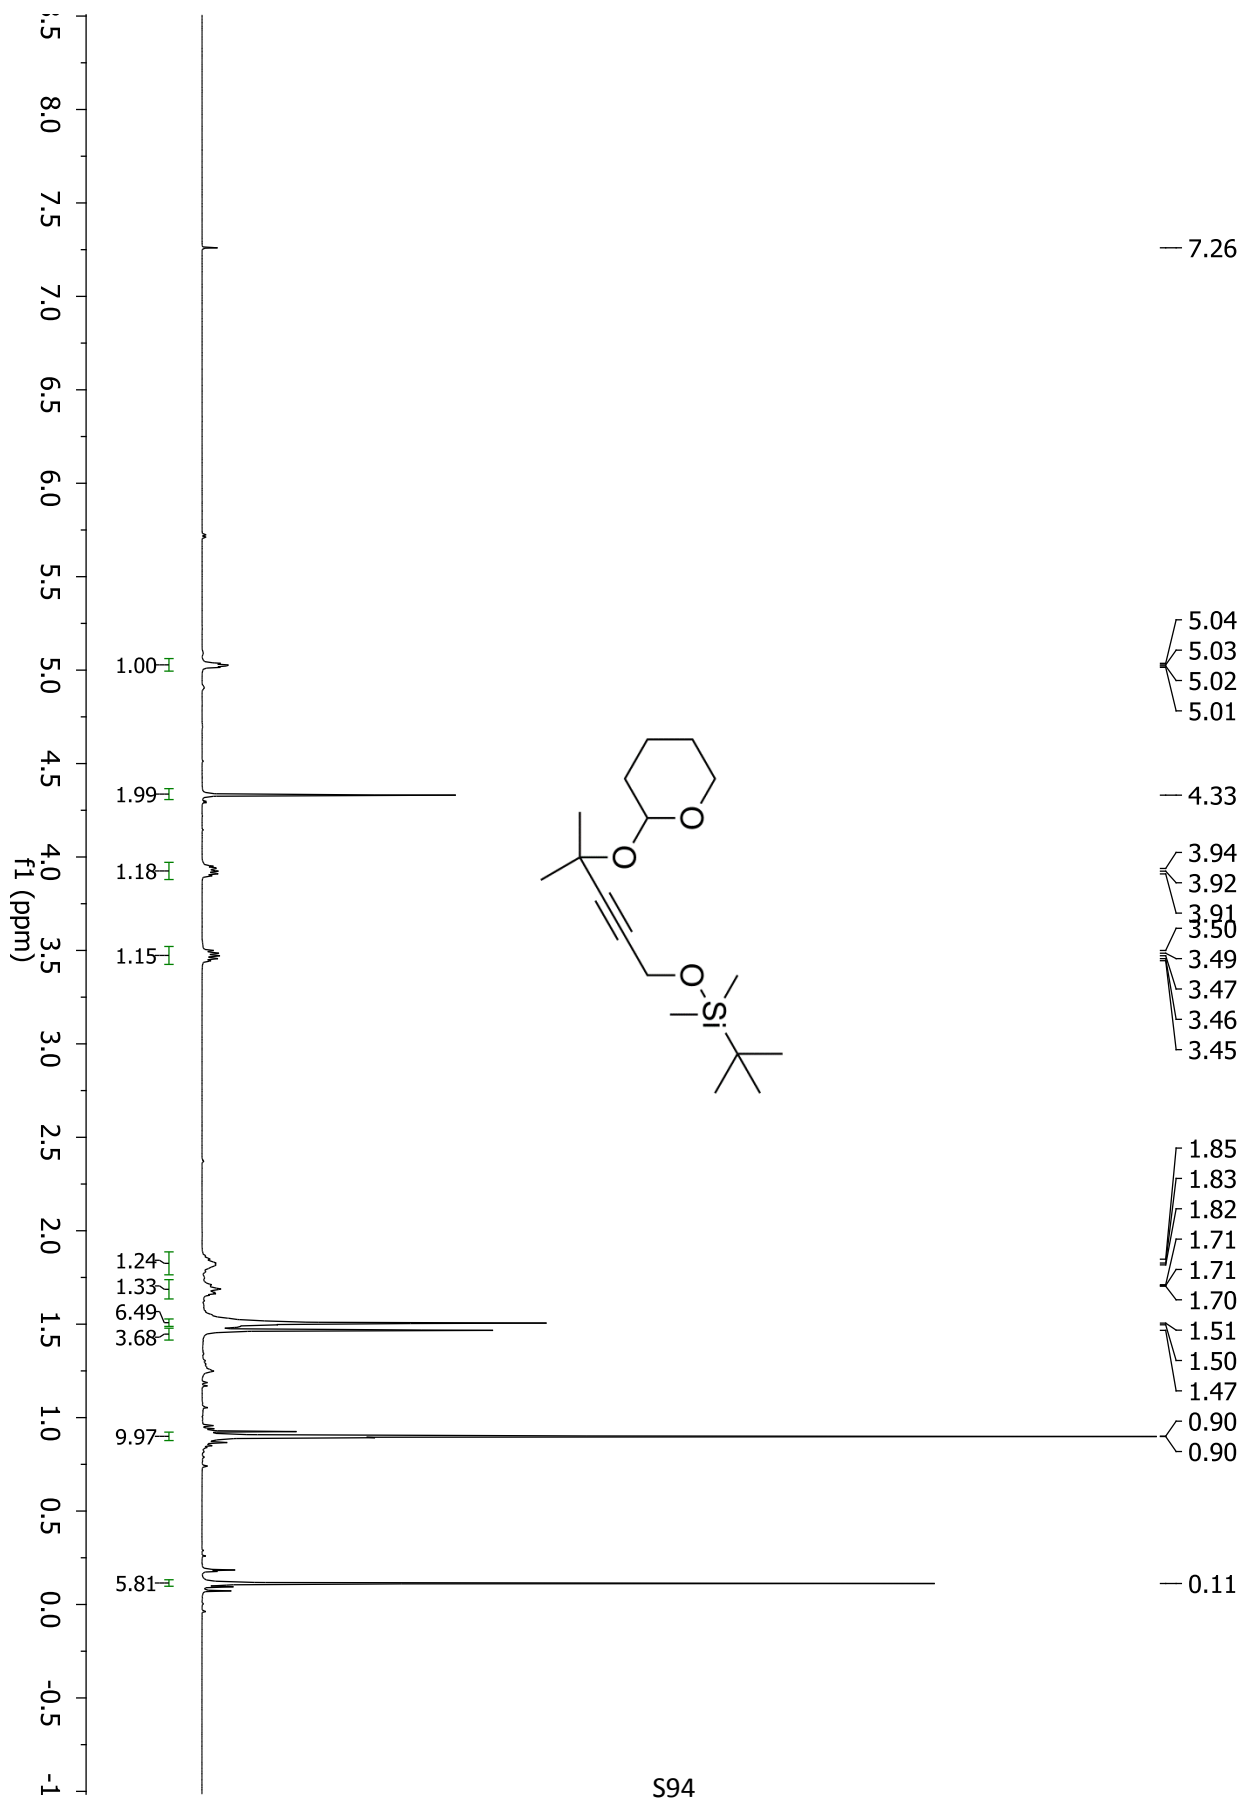

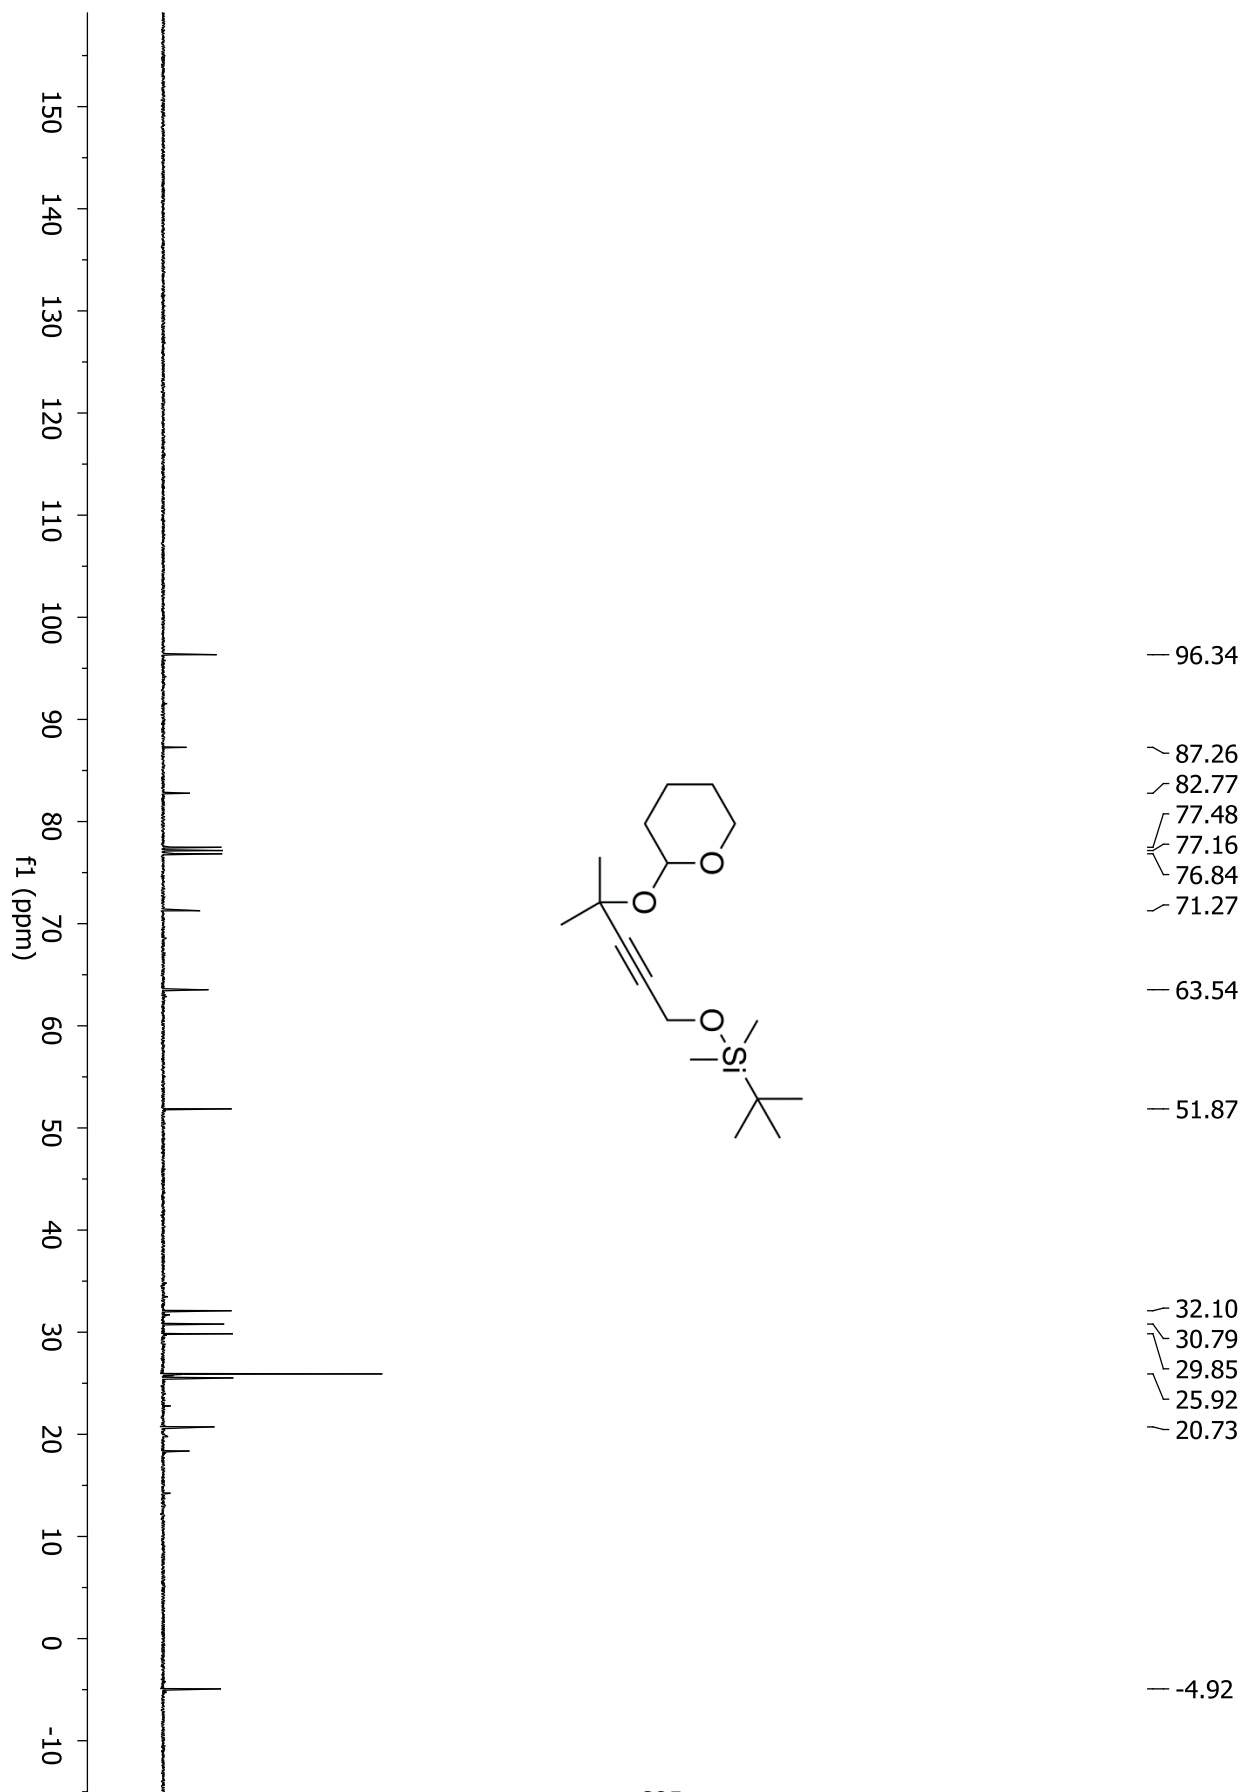



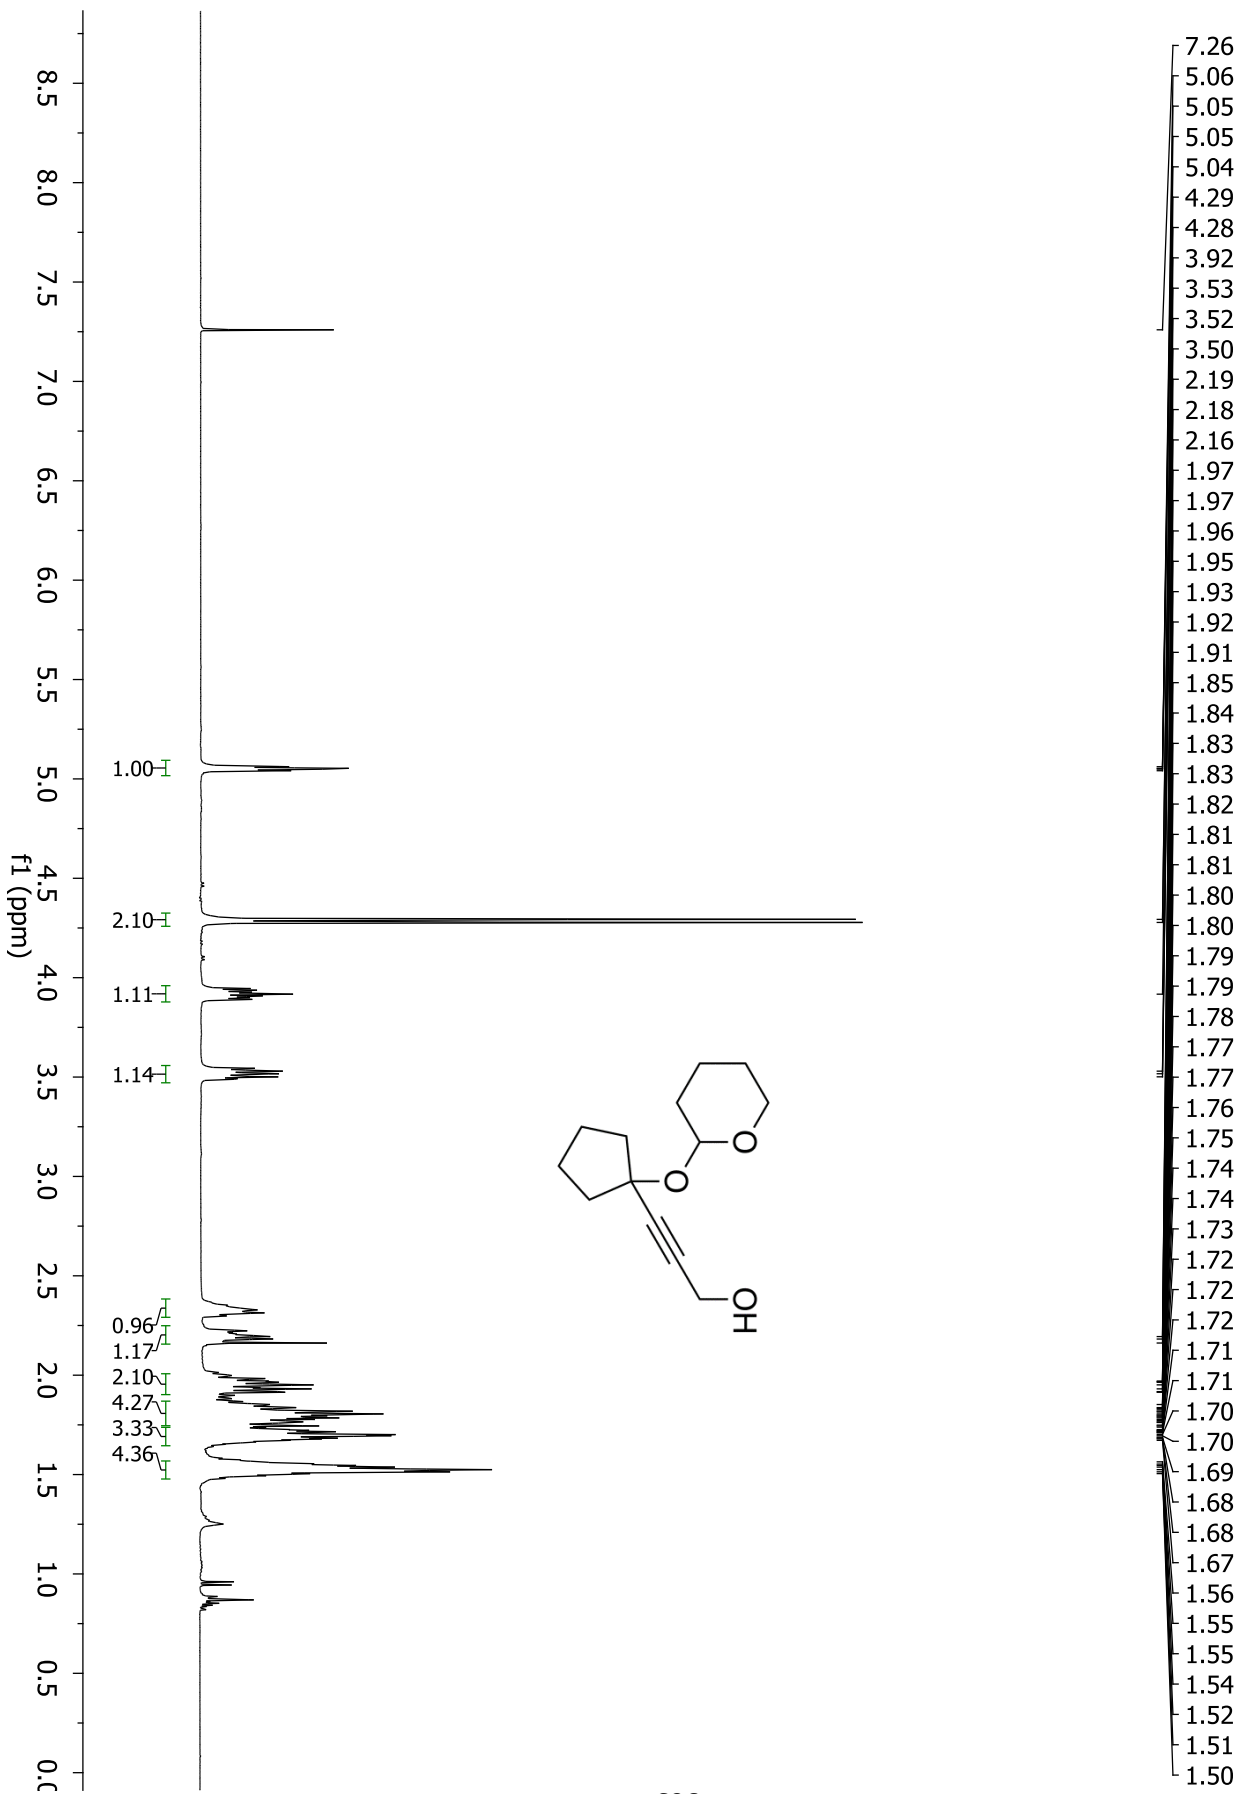

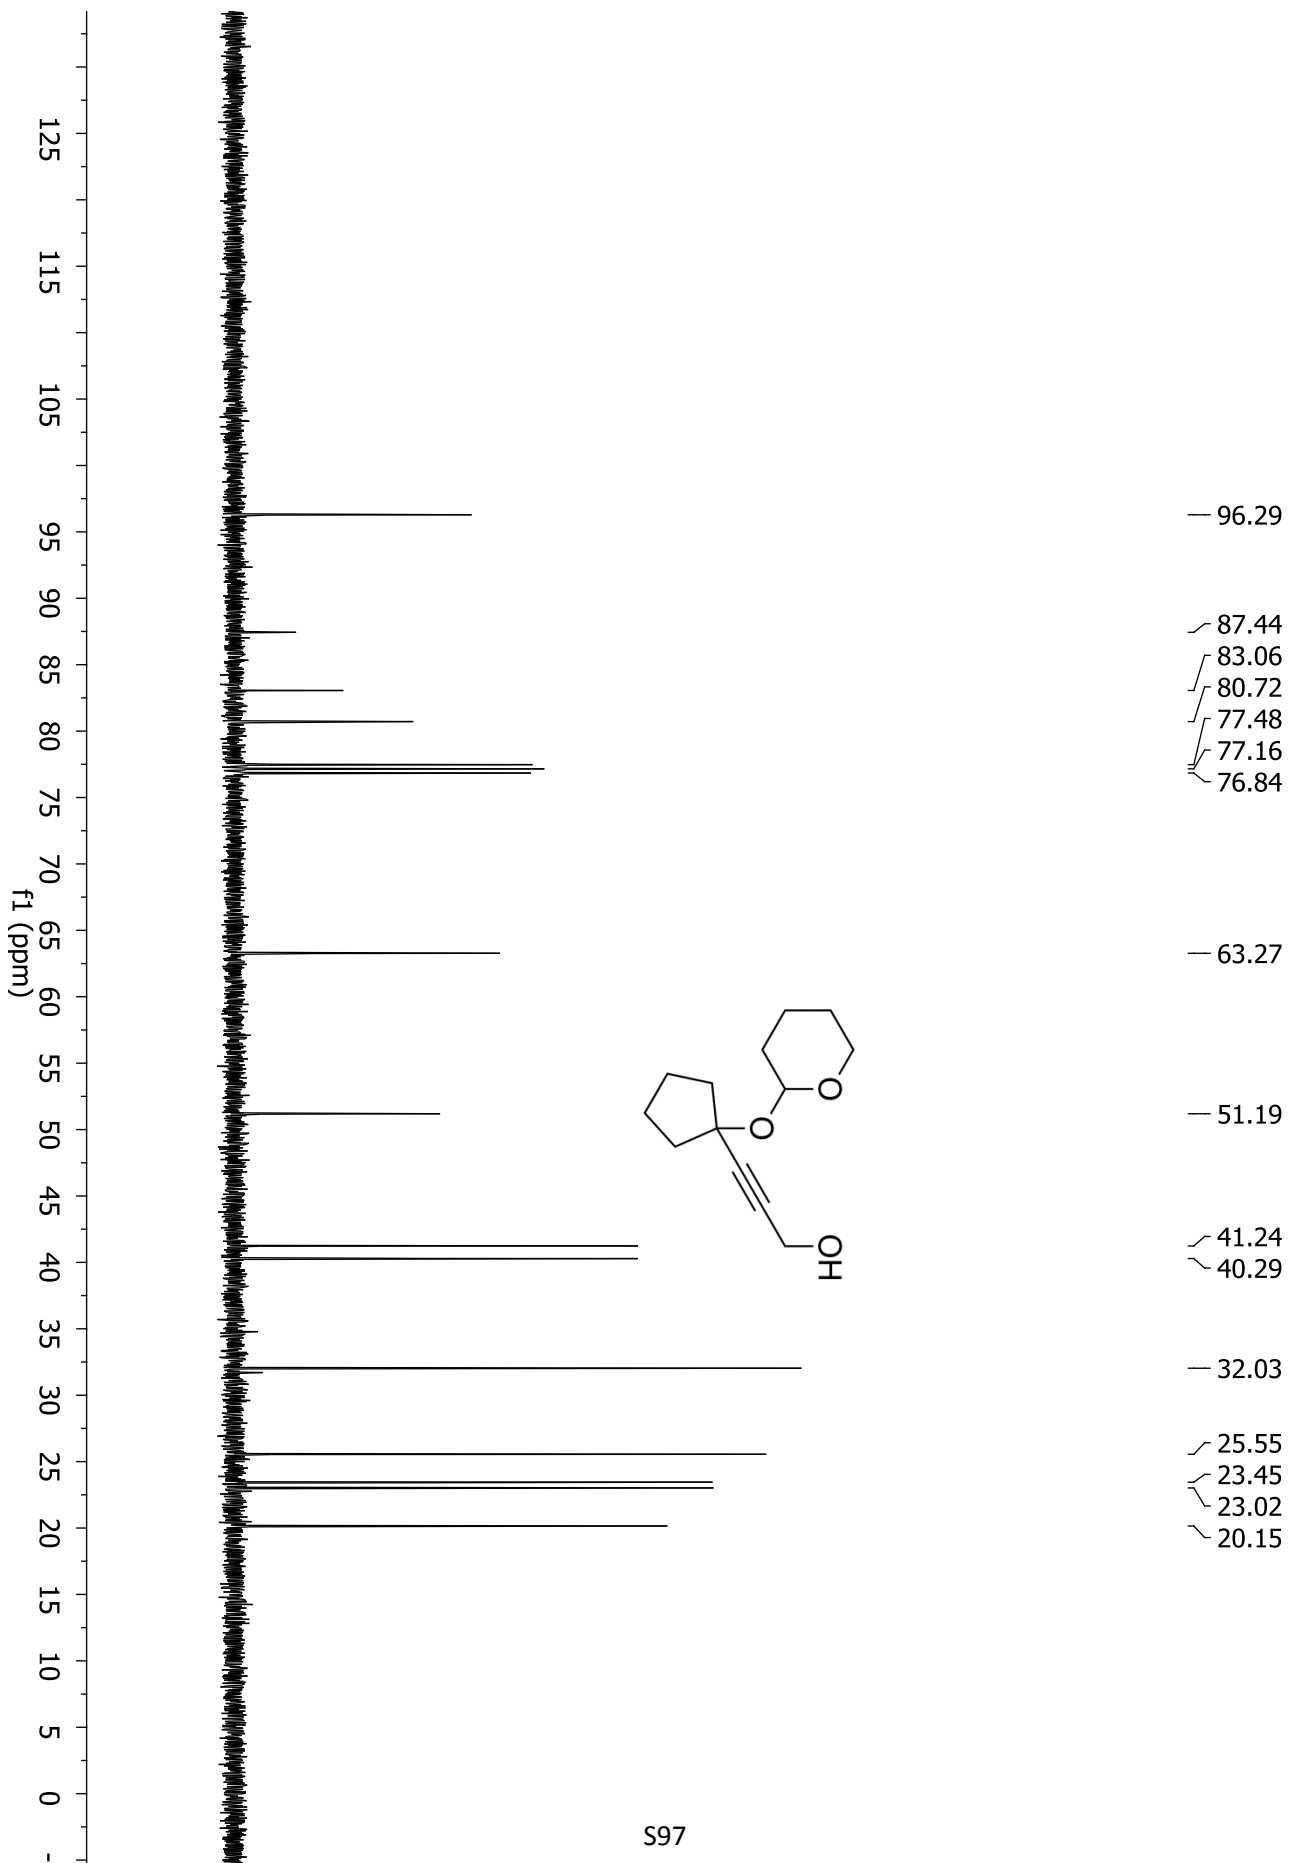

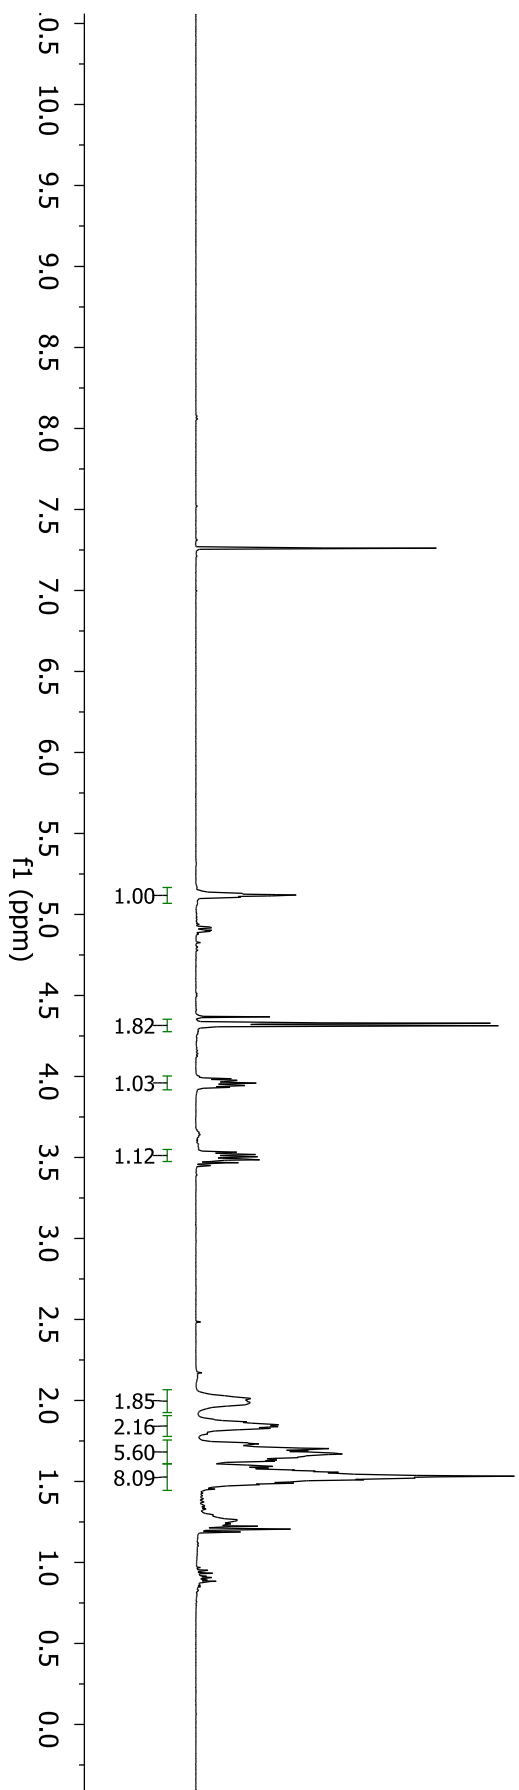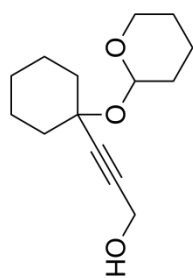

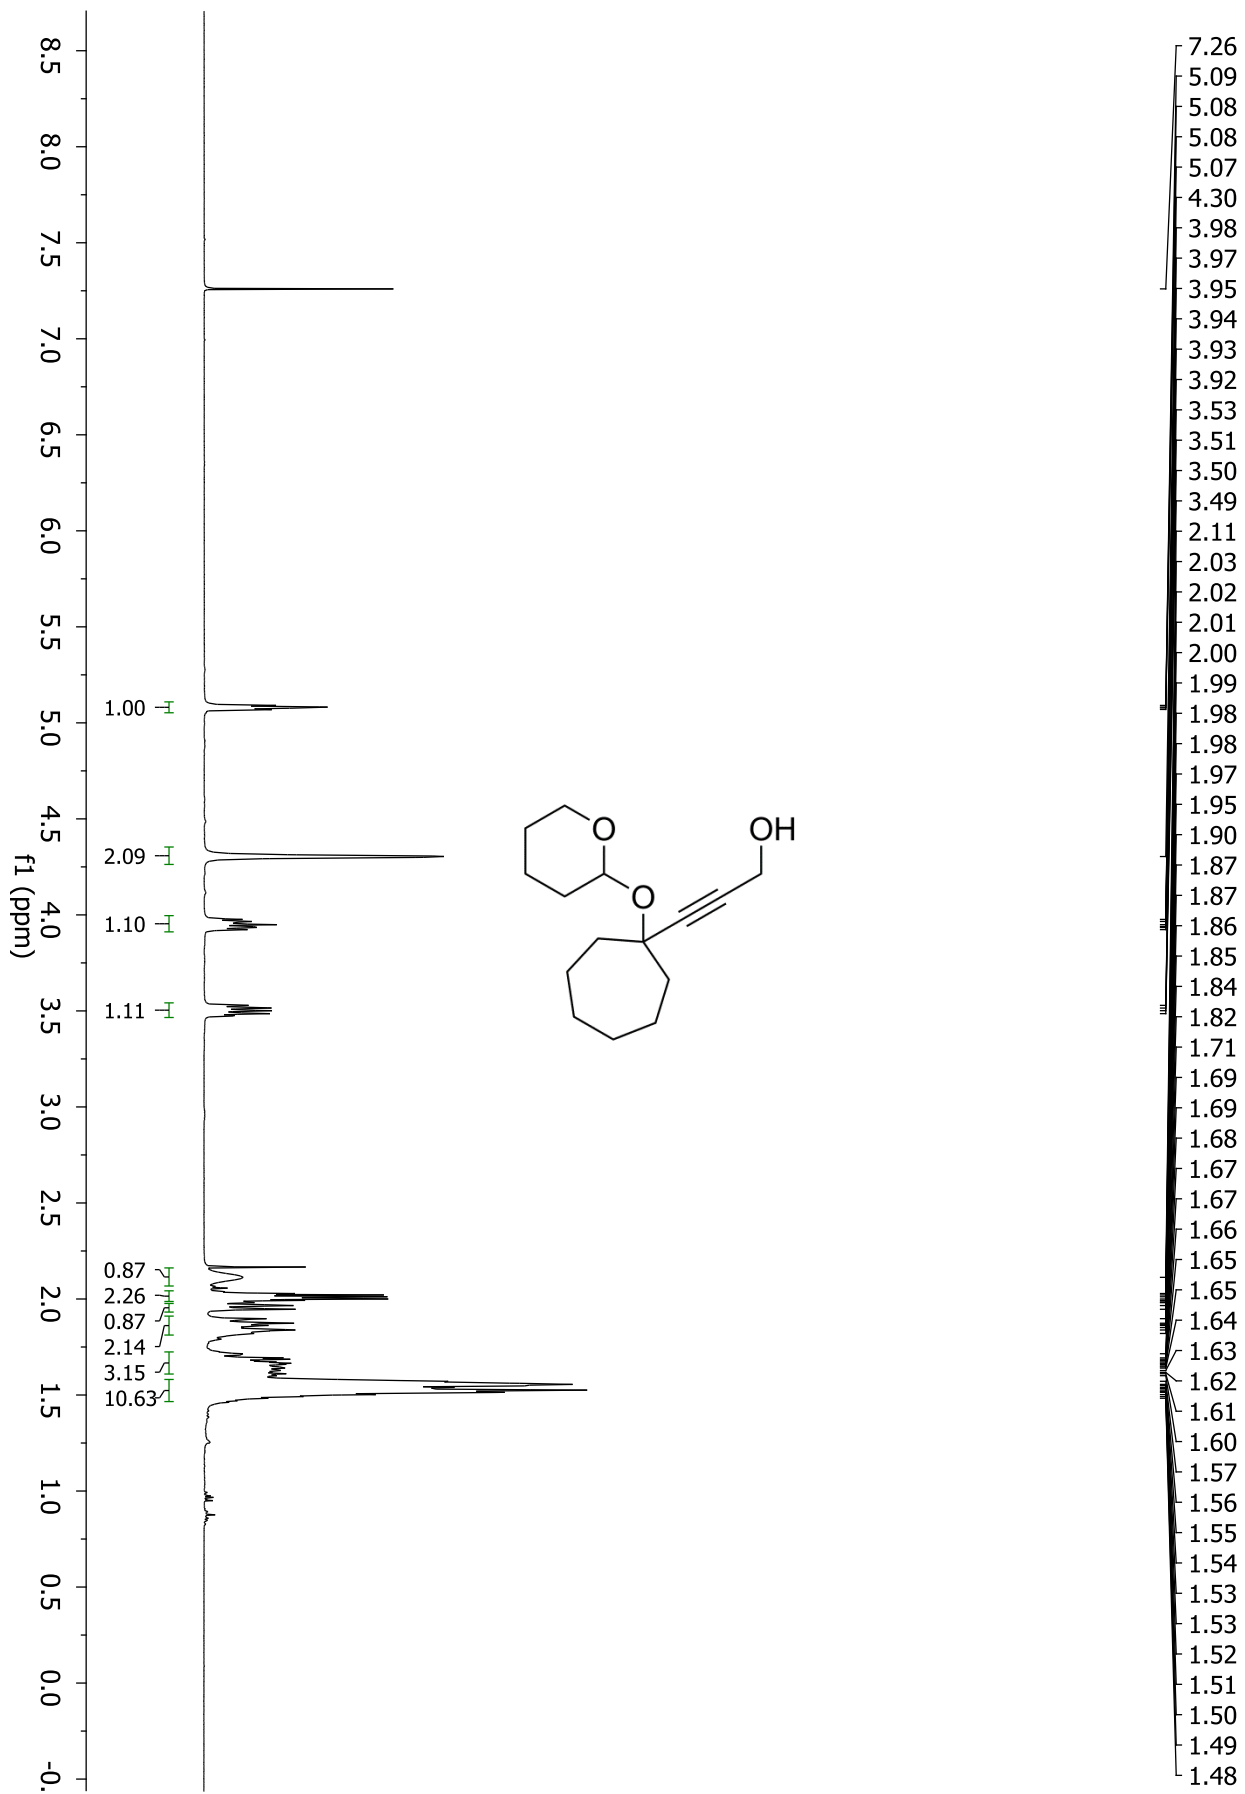

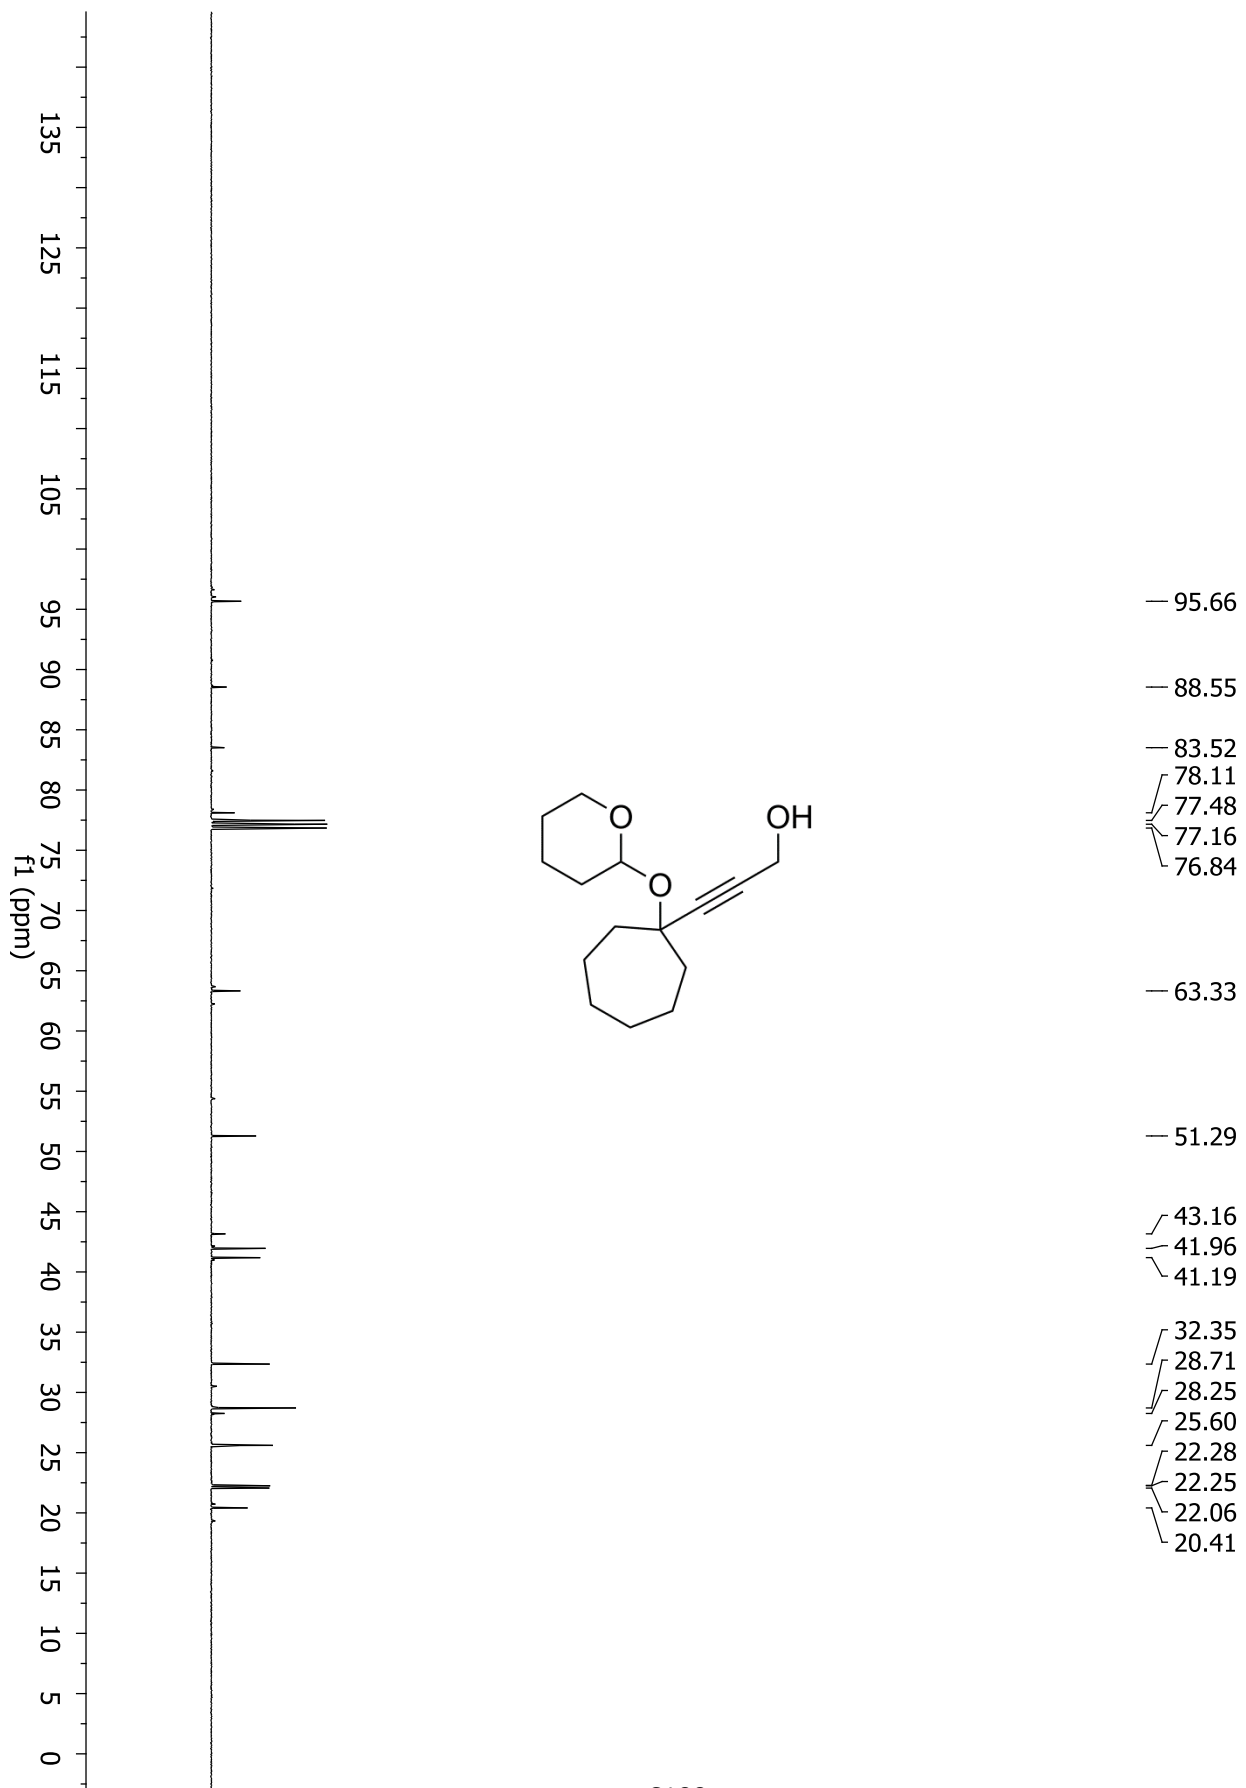

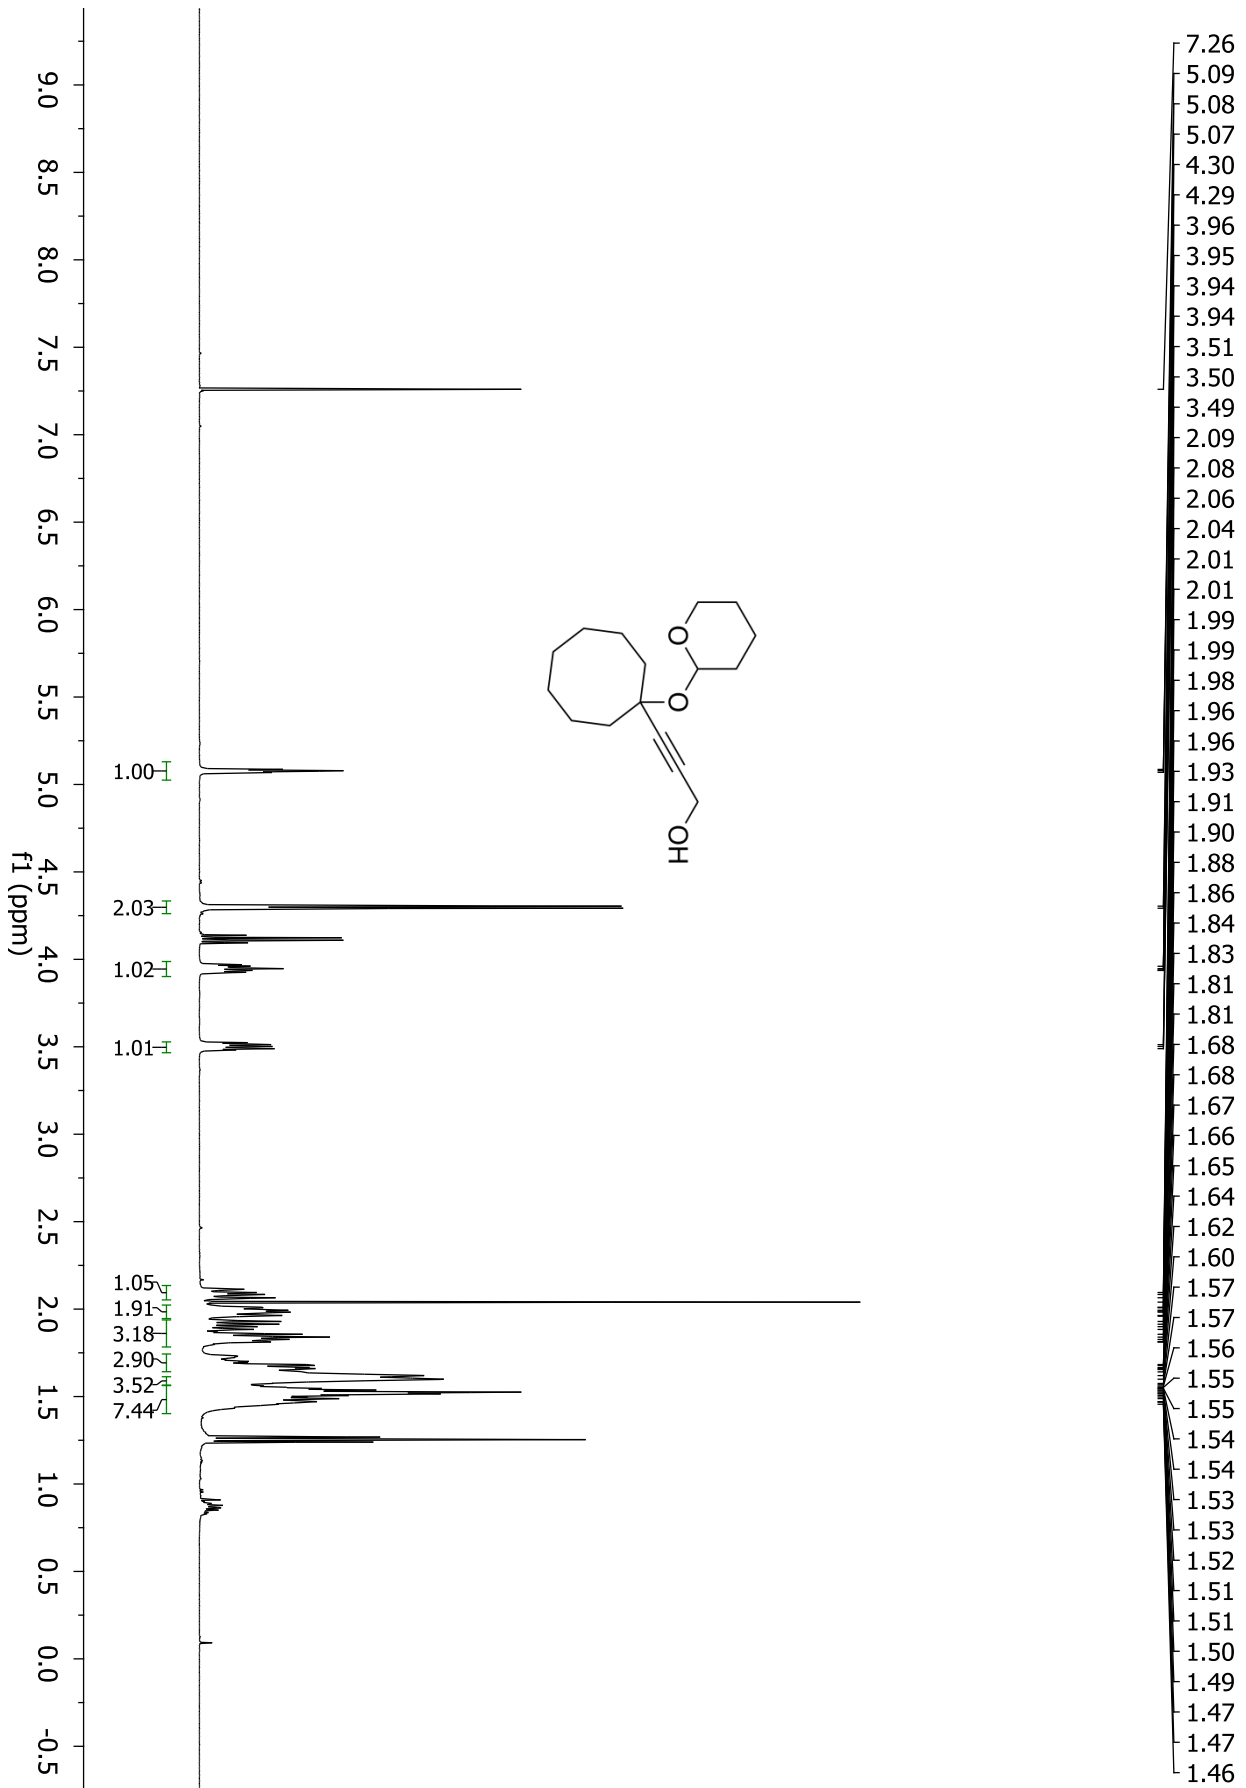

S101

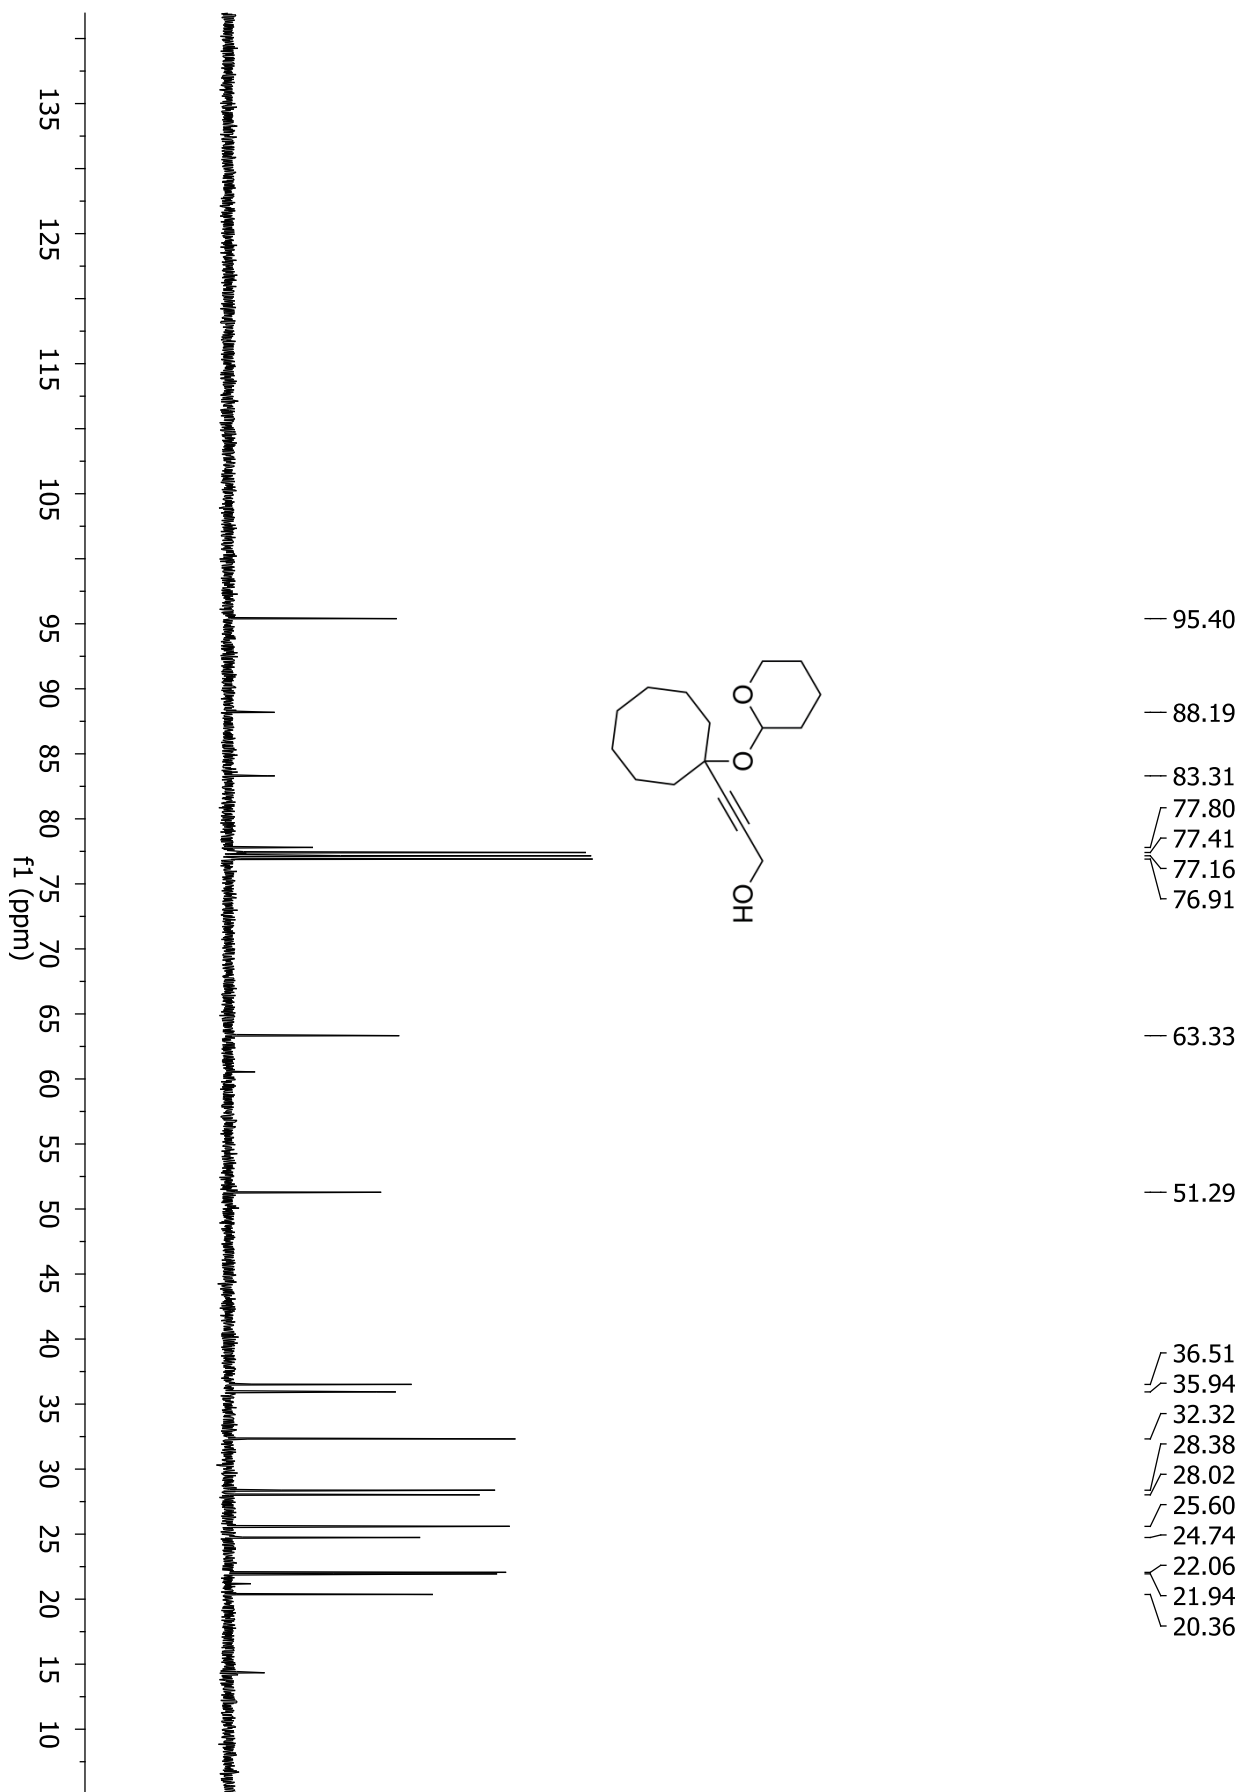

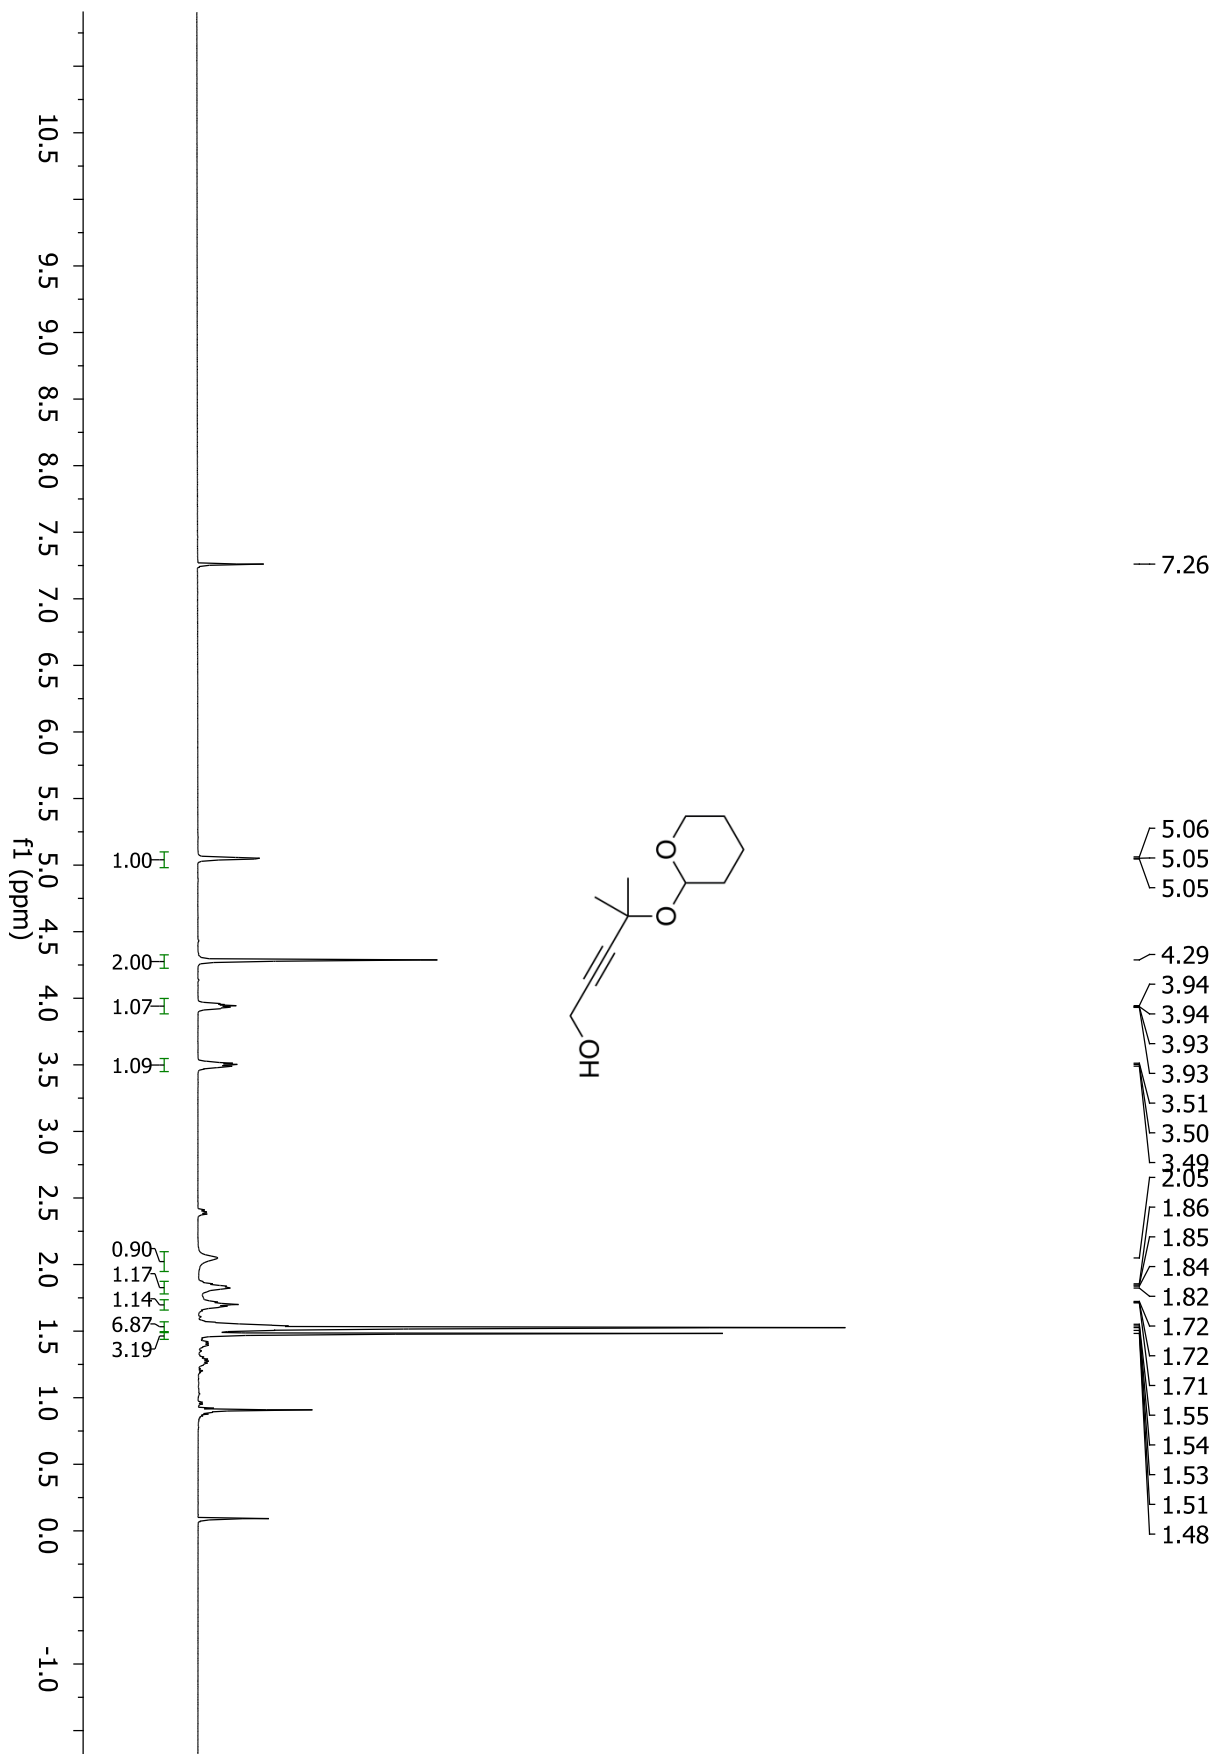



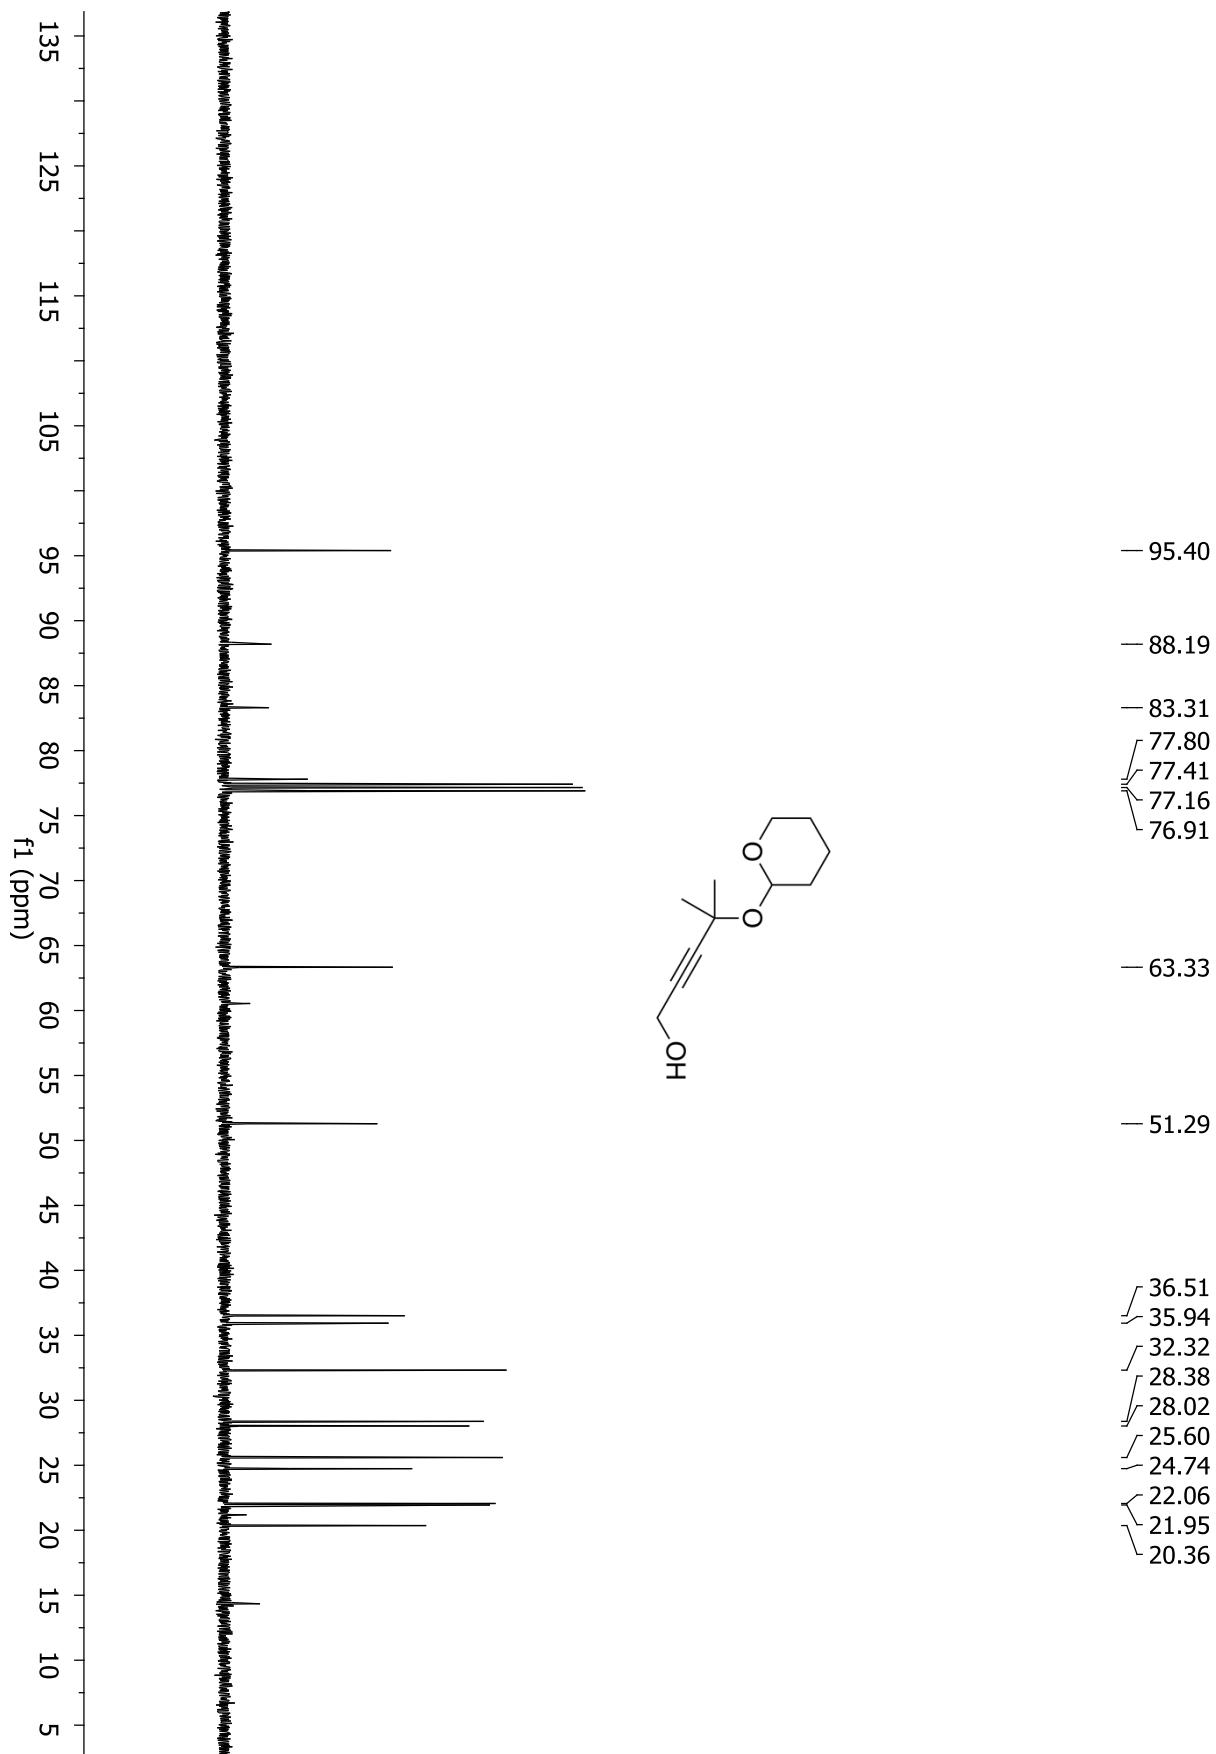

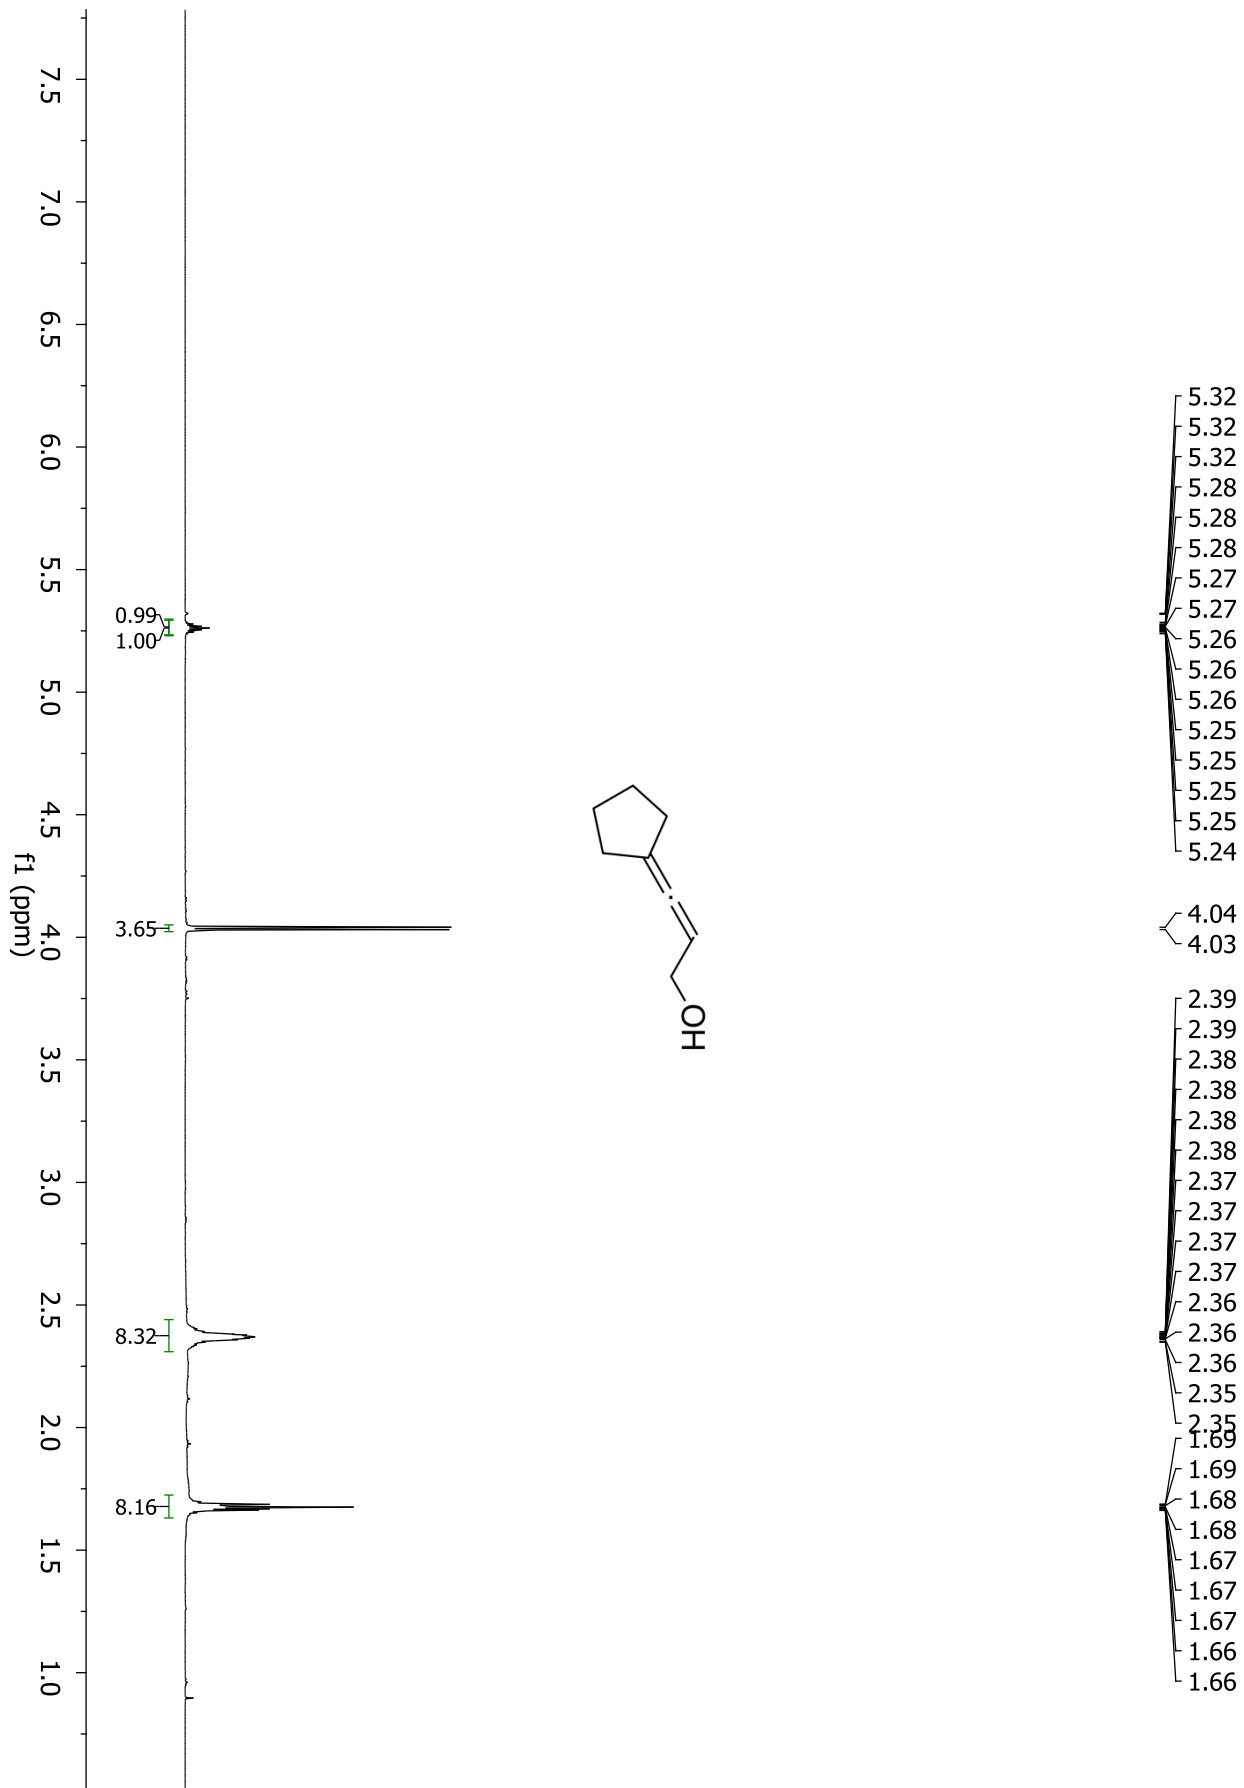

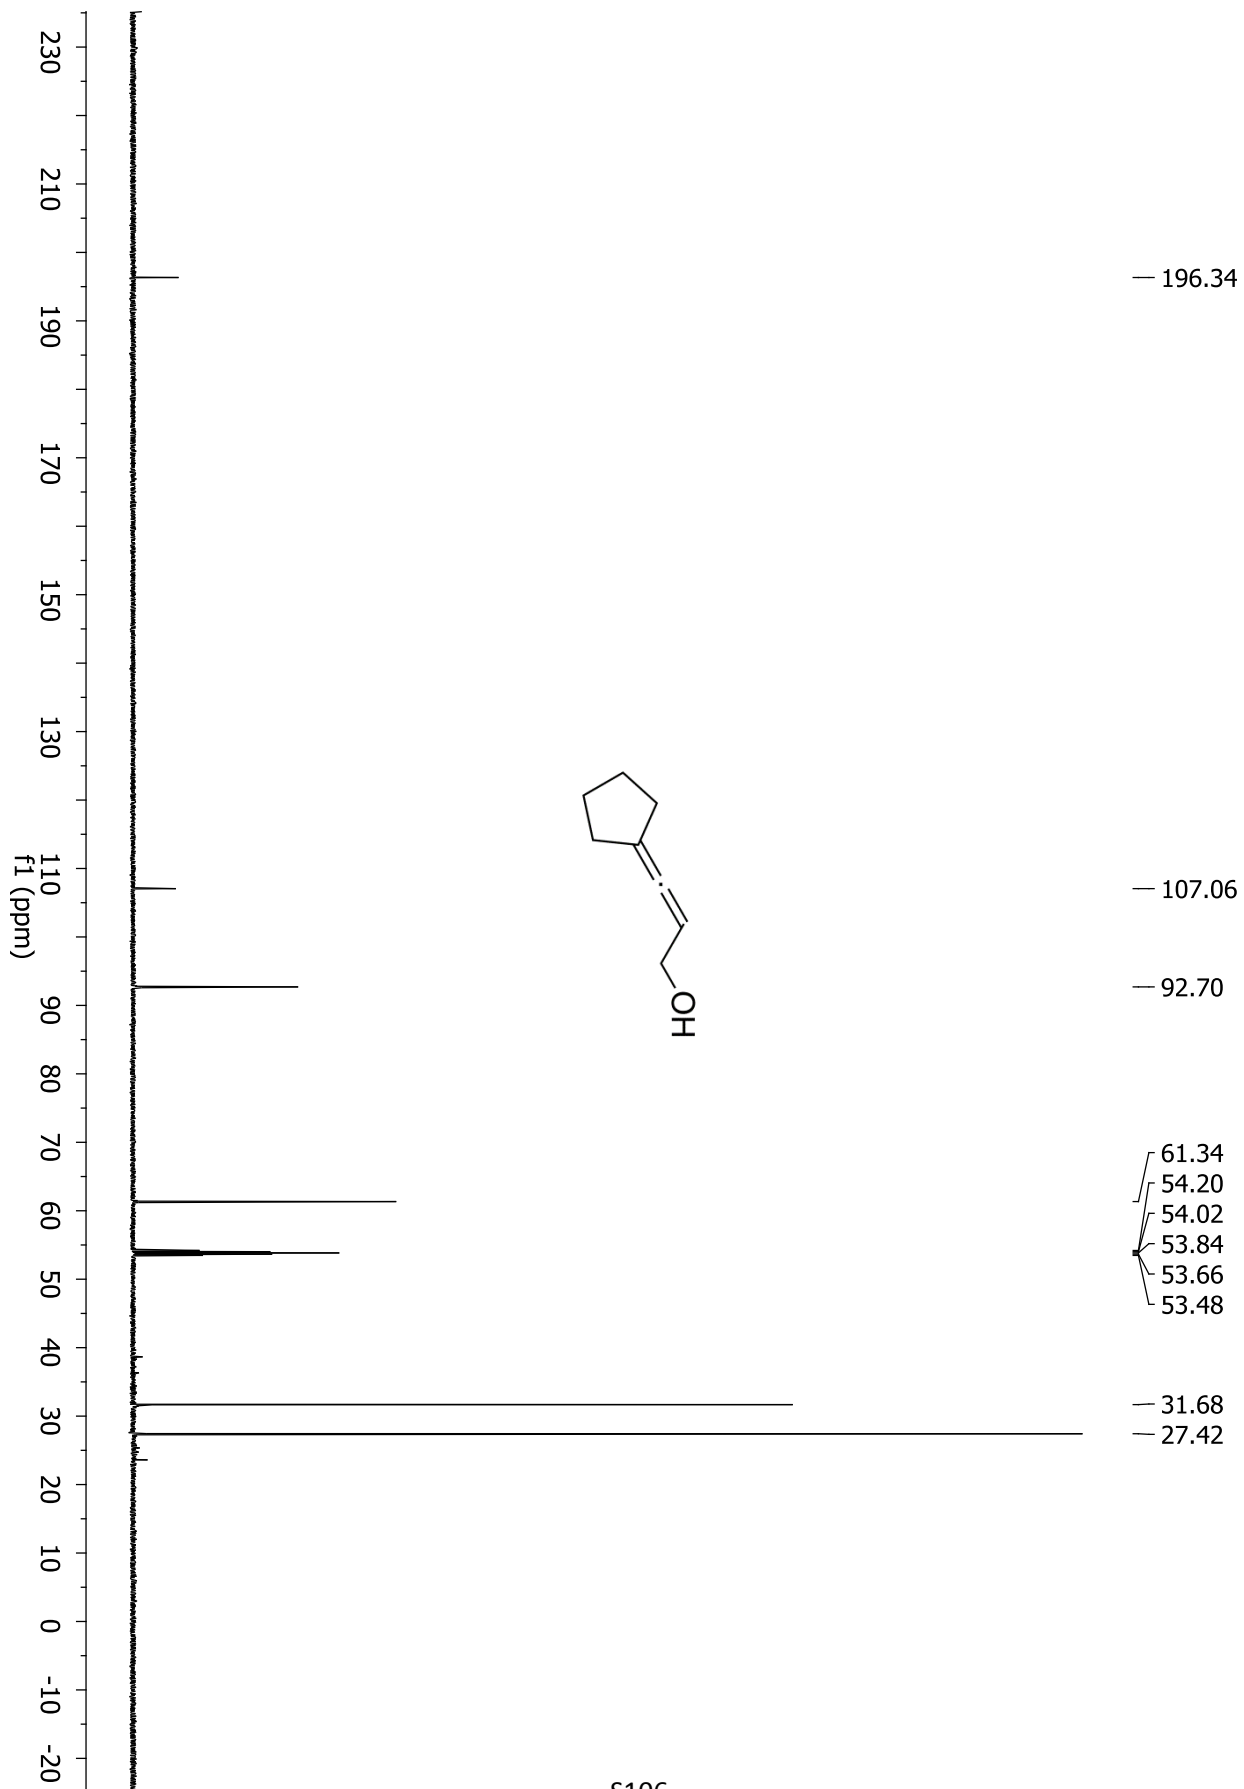

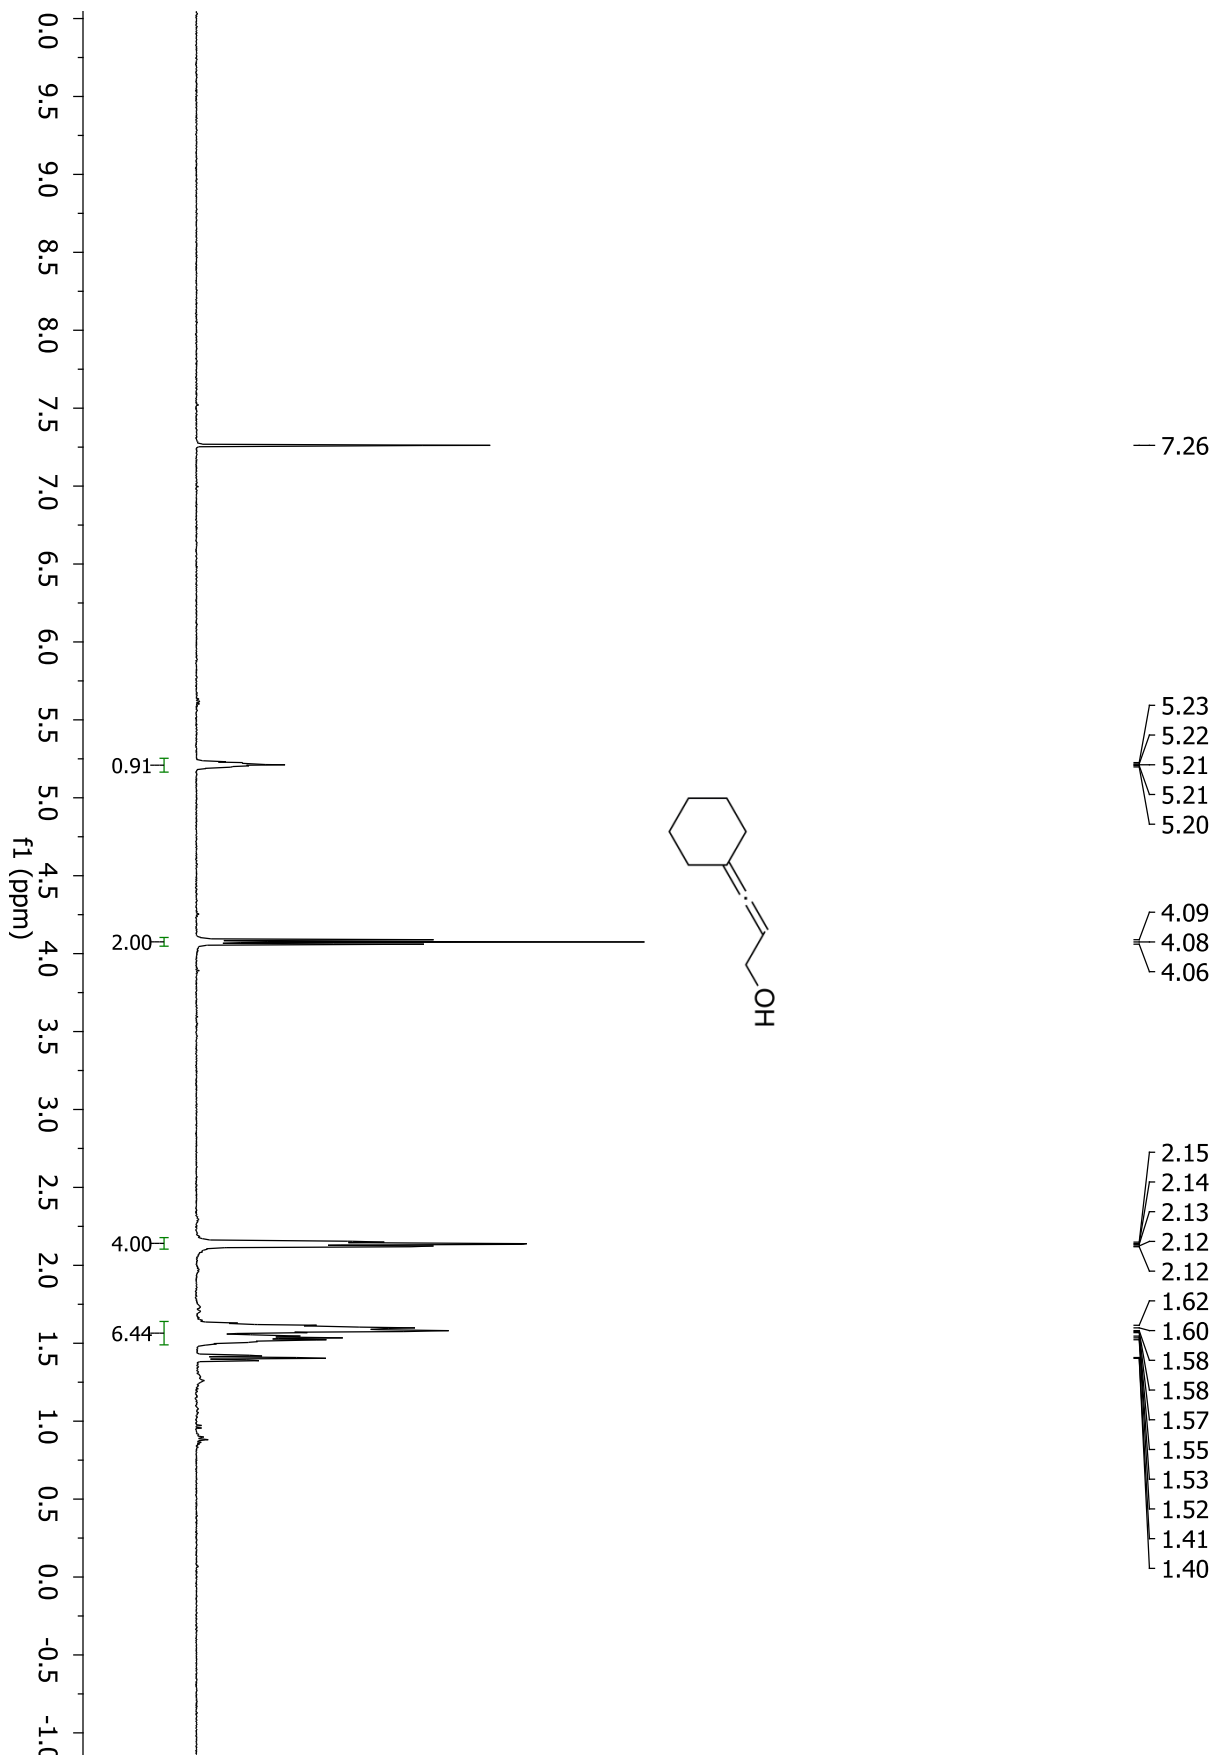

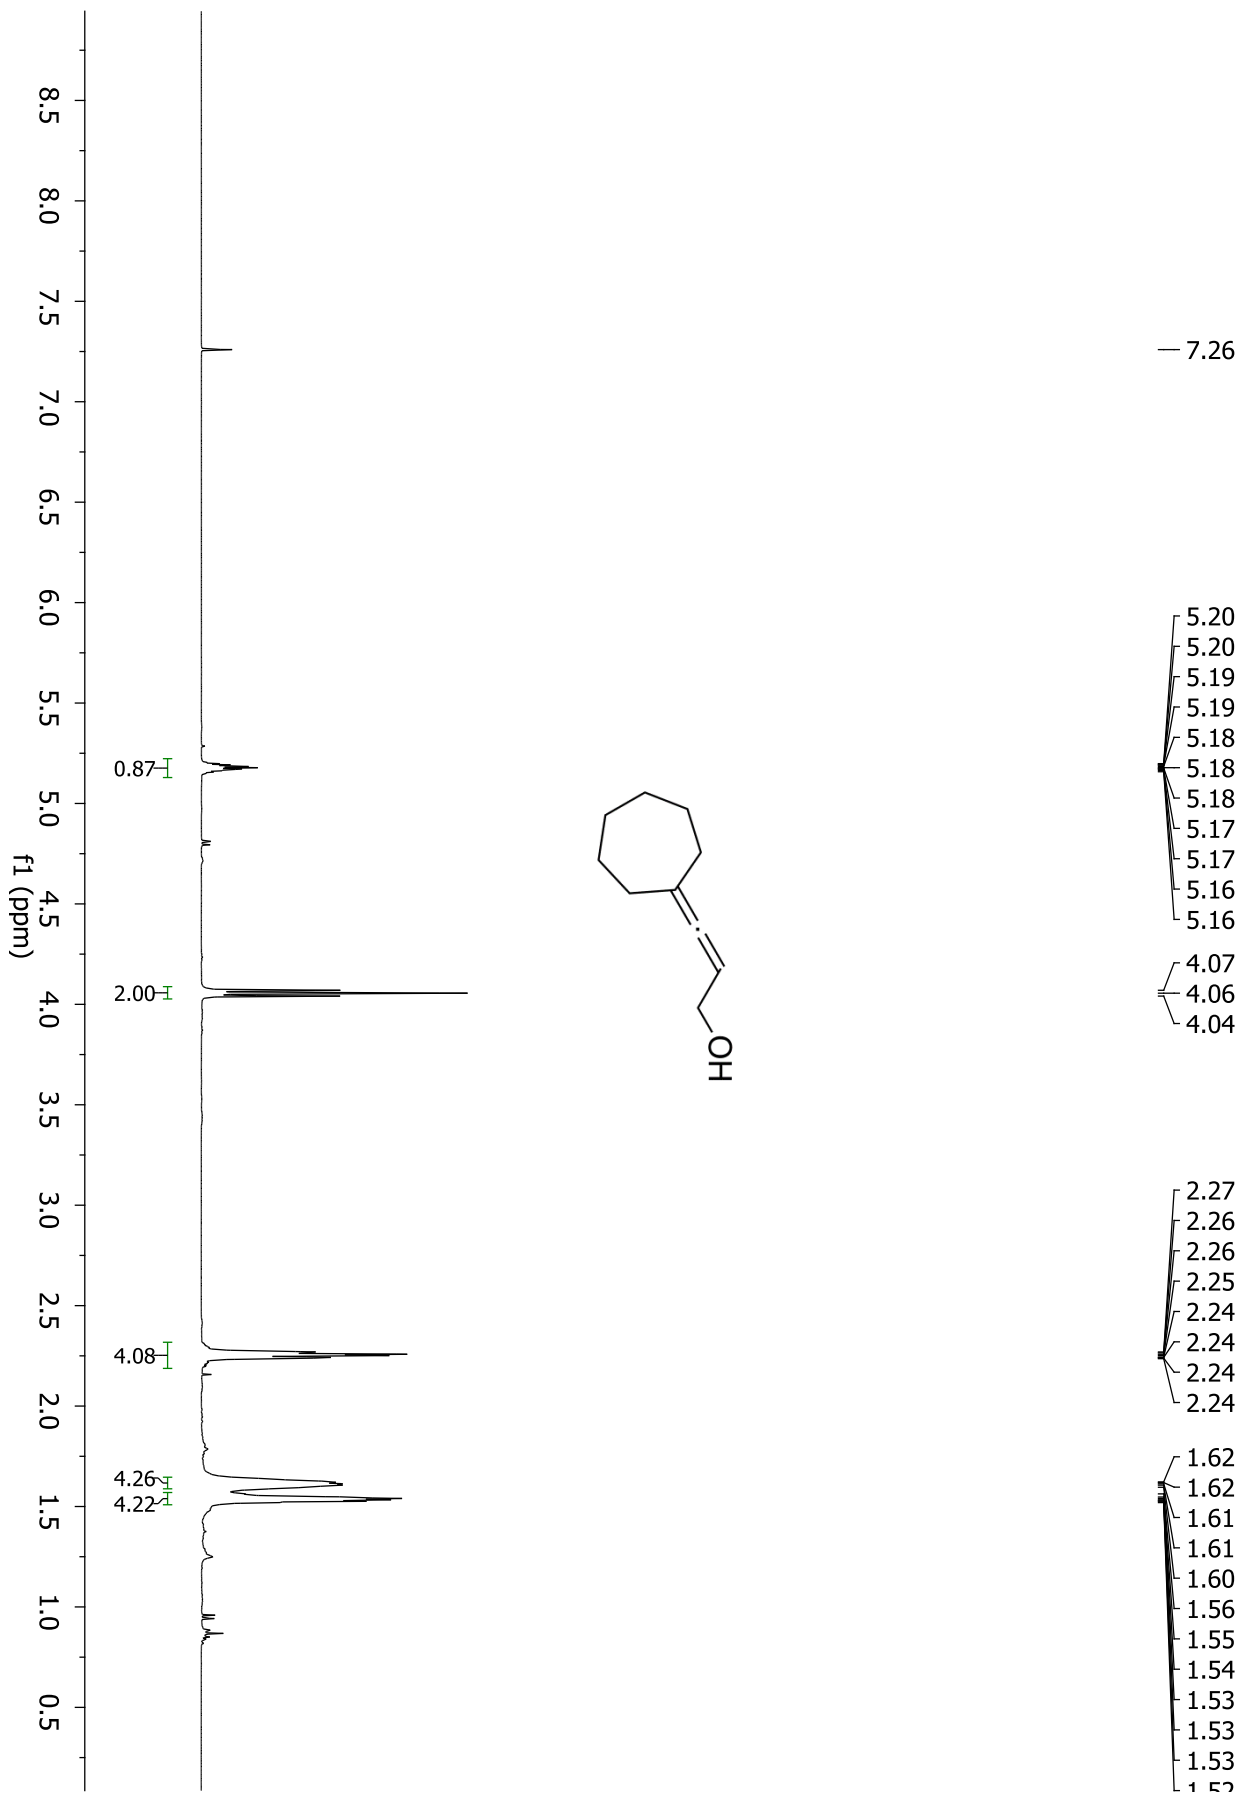

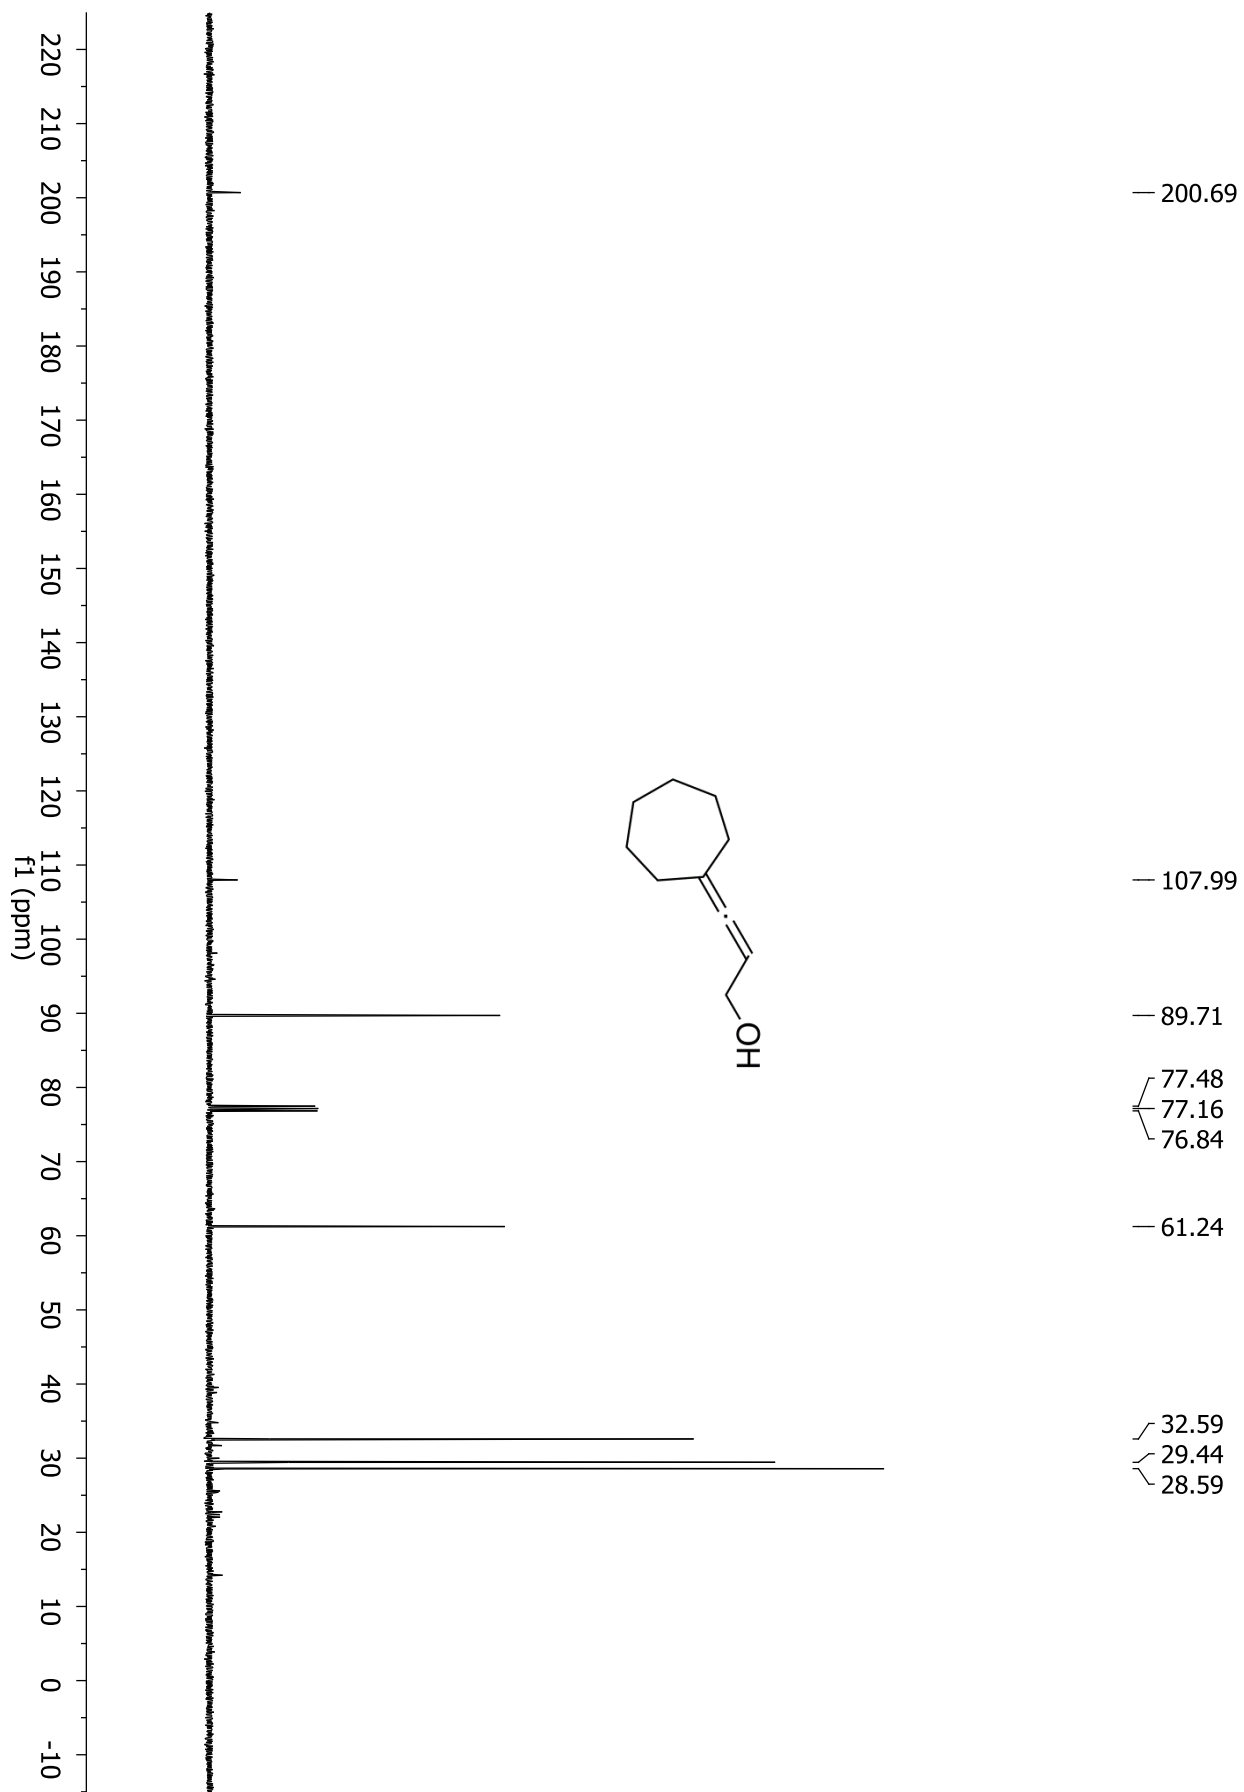

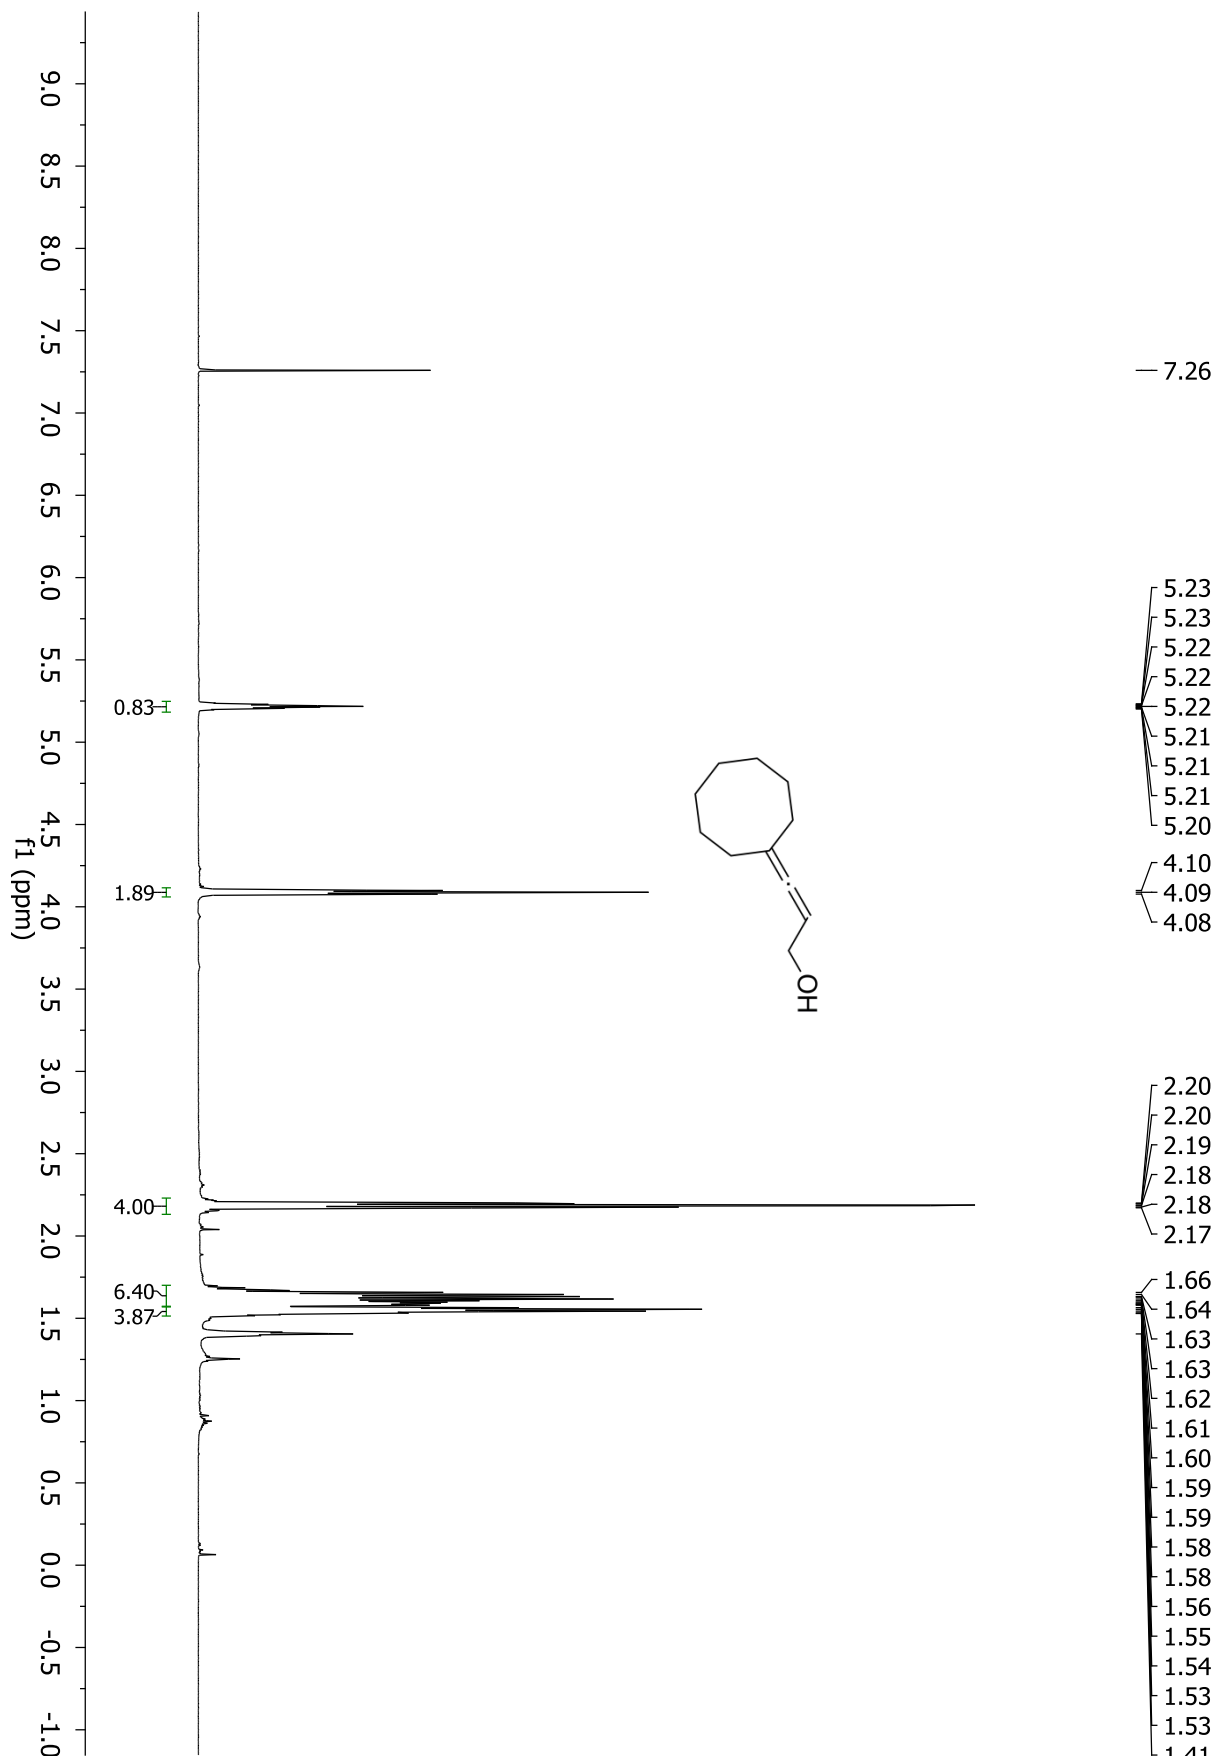

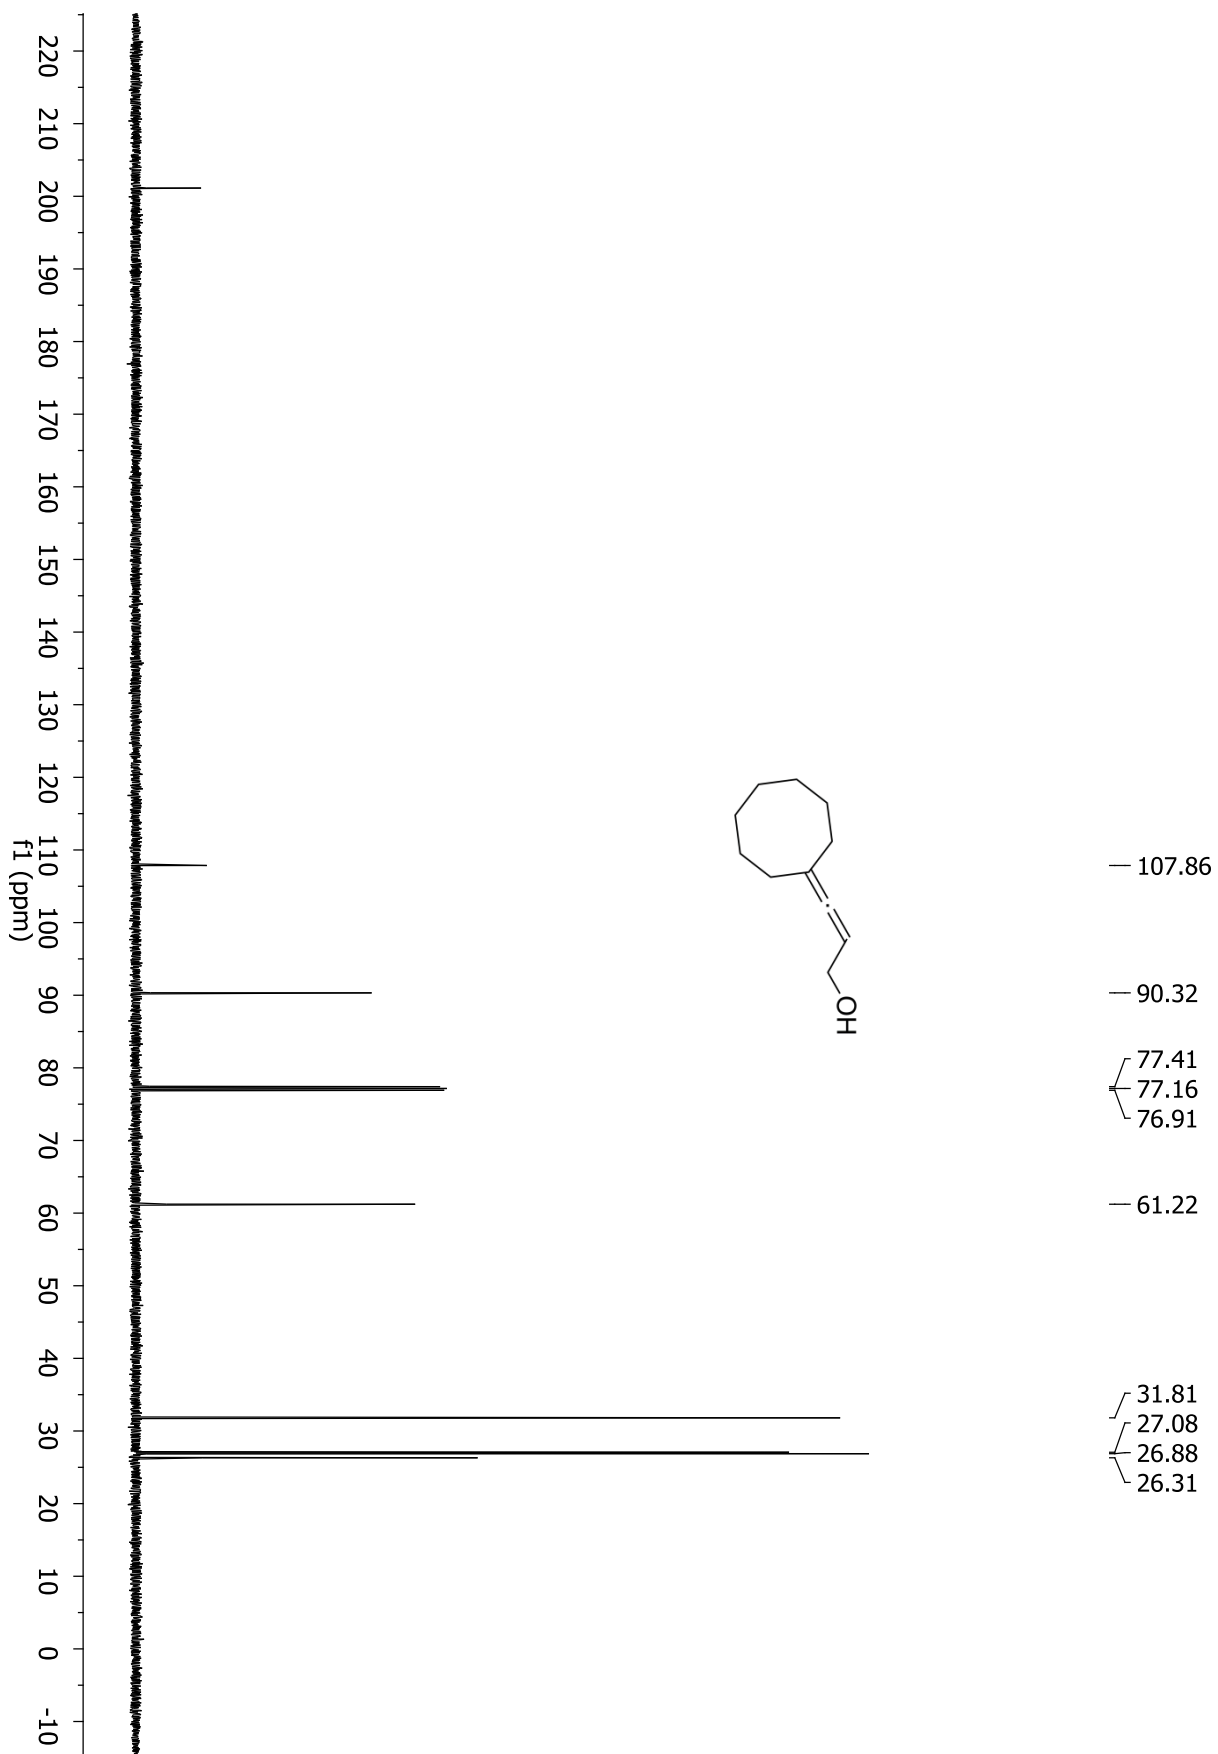



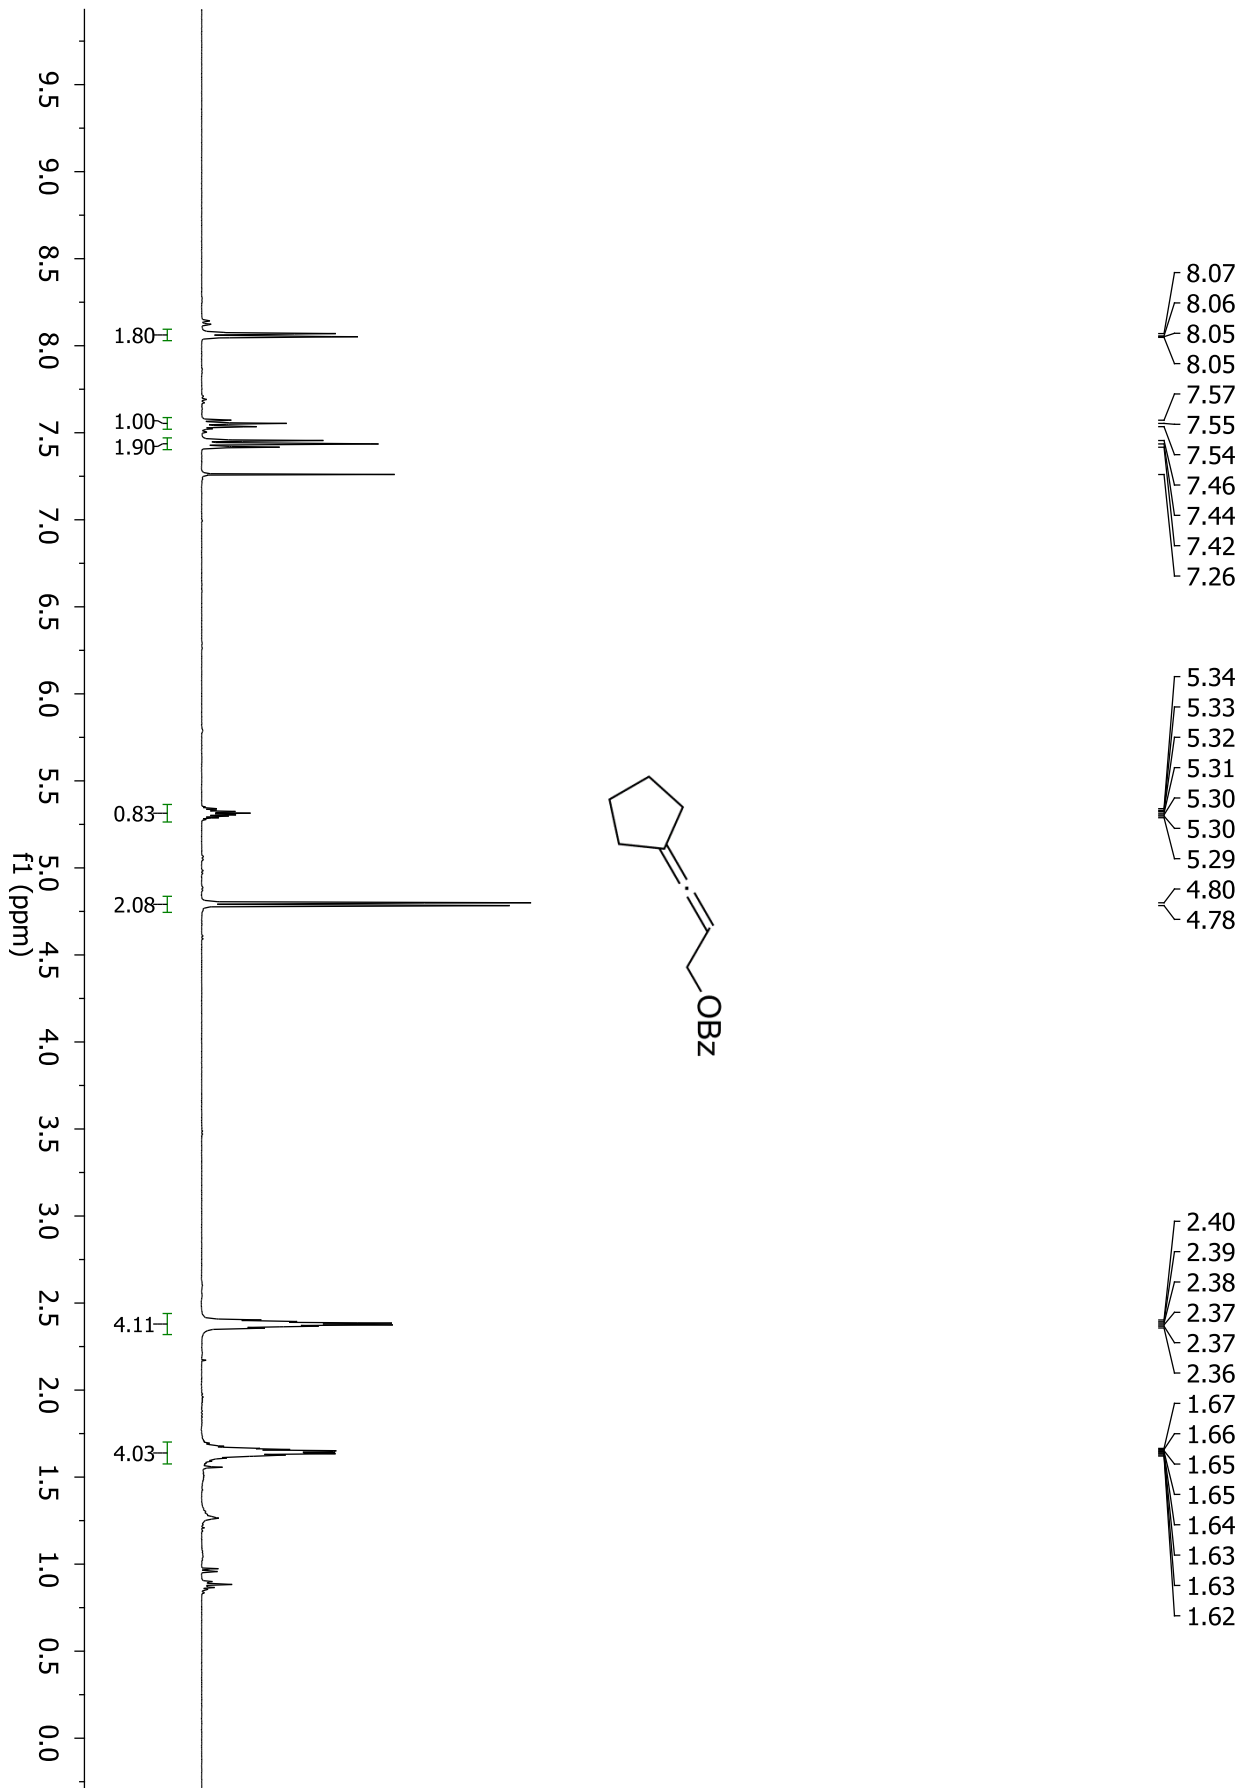

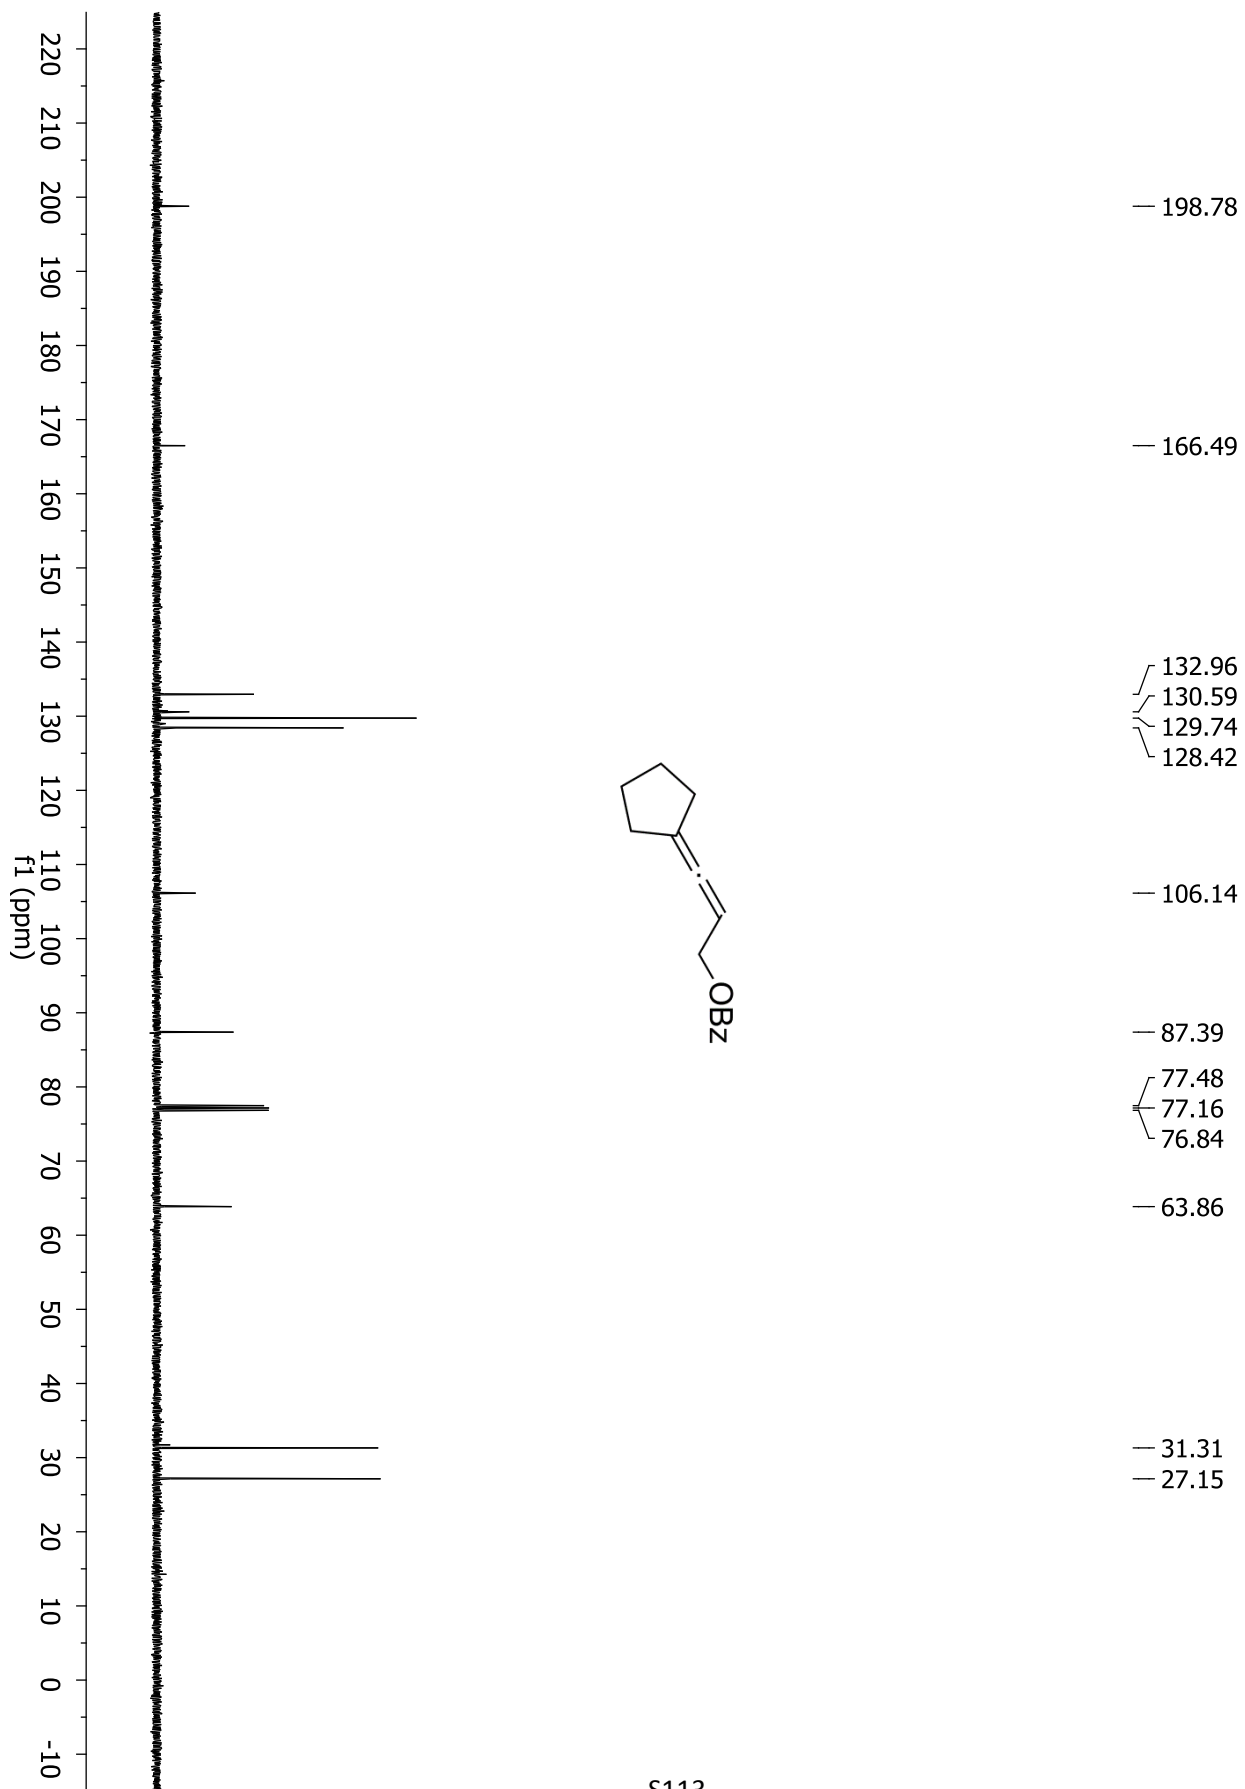

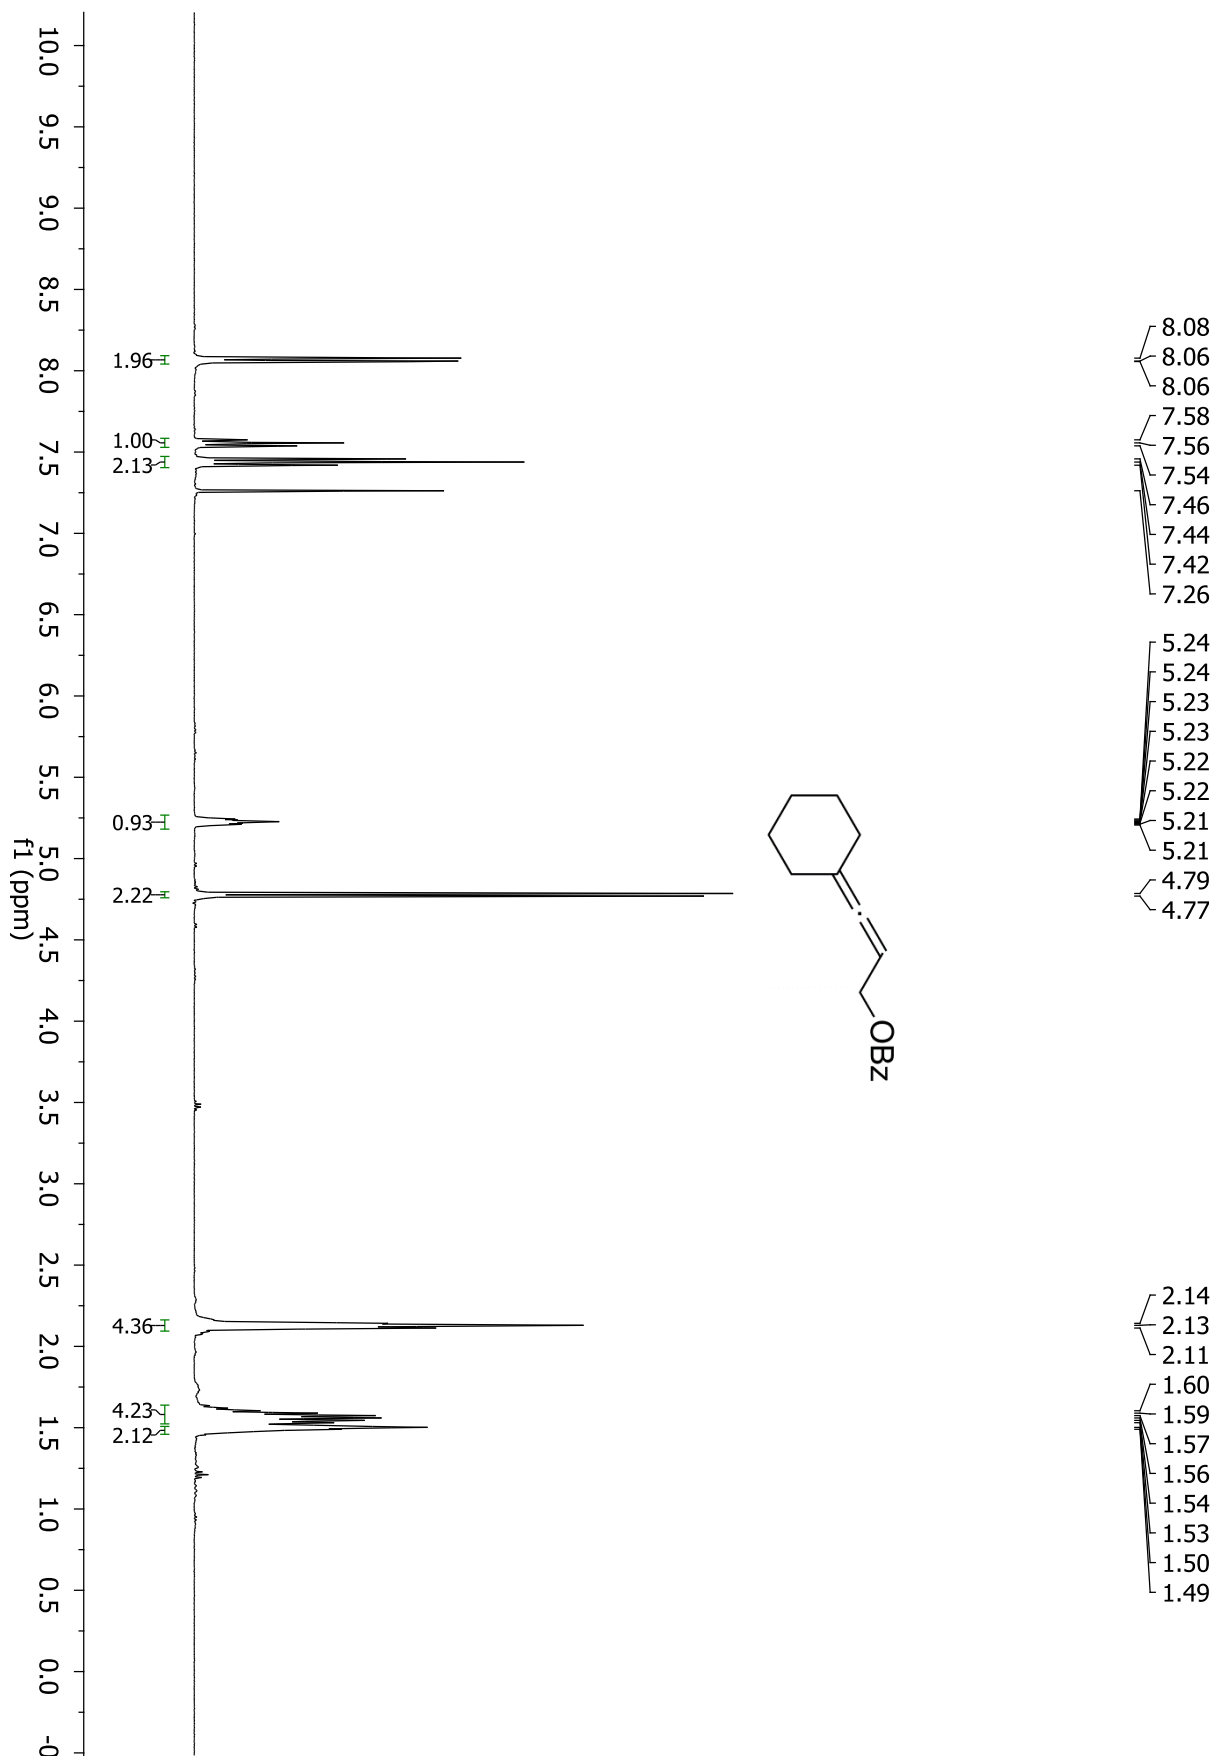

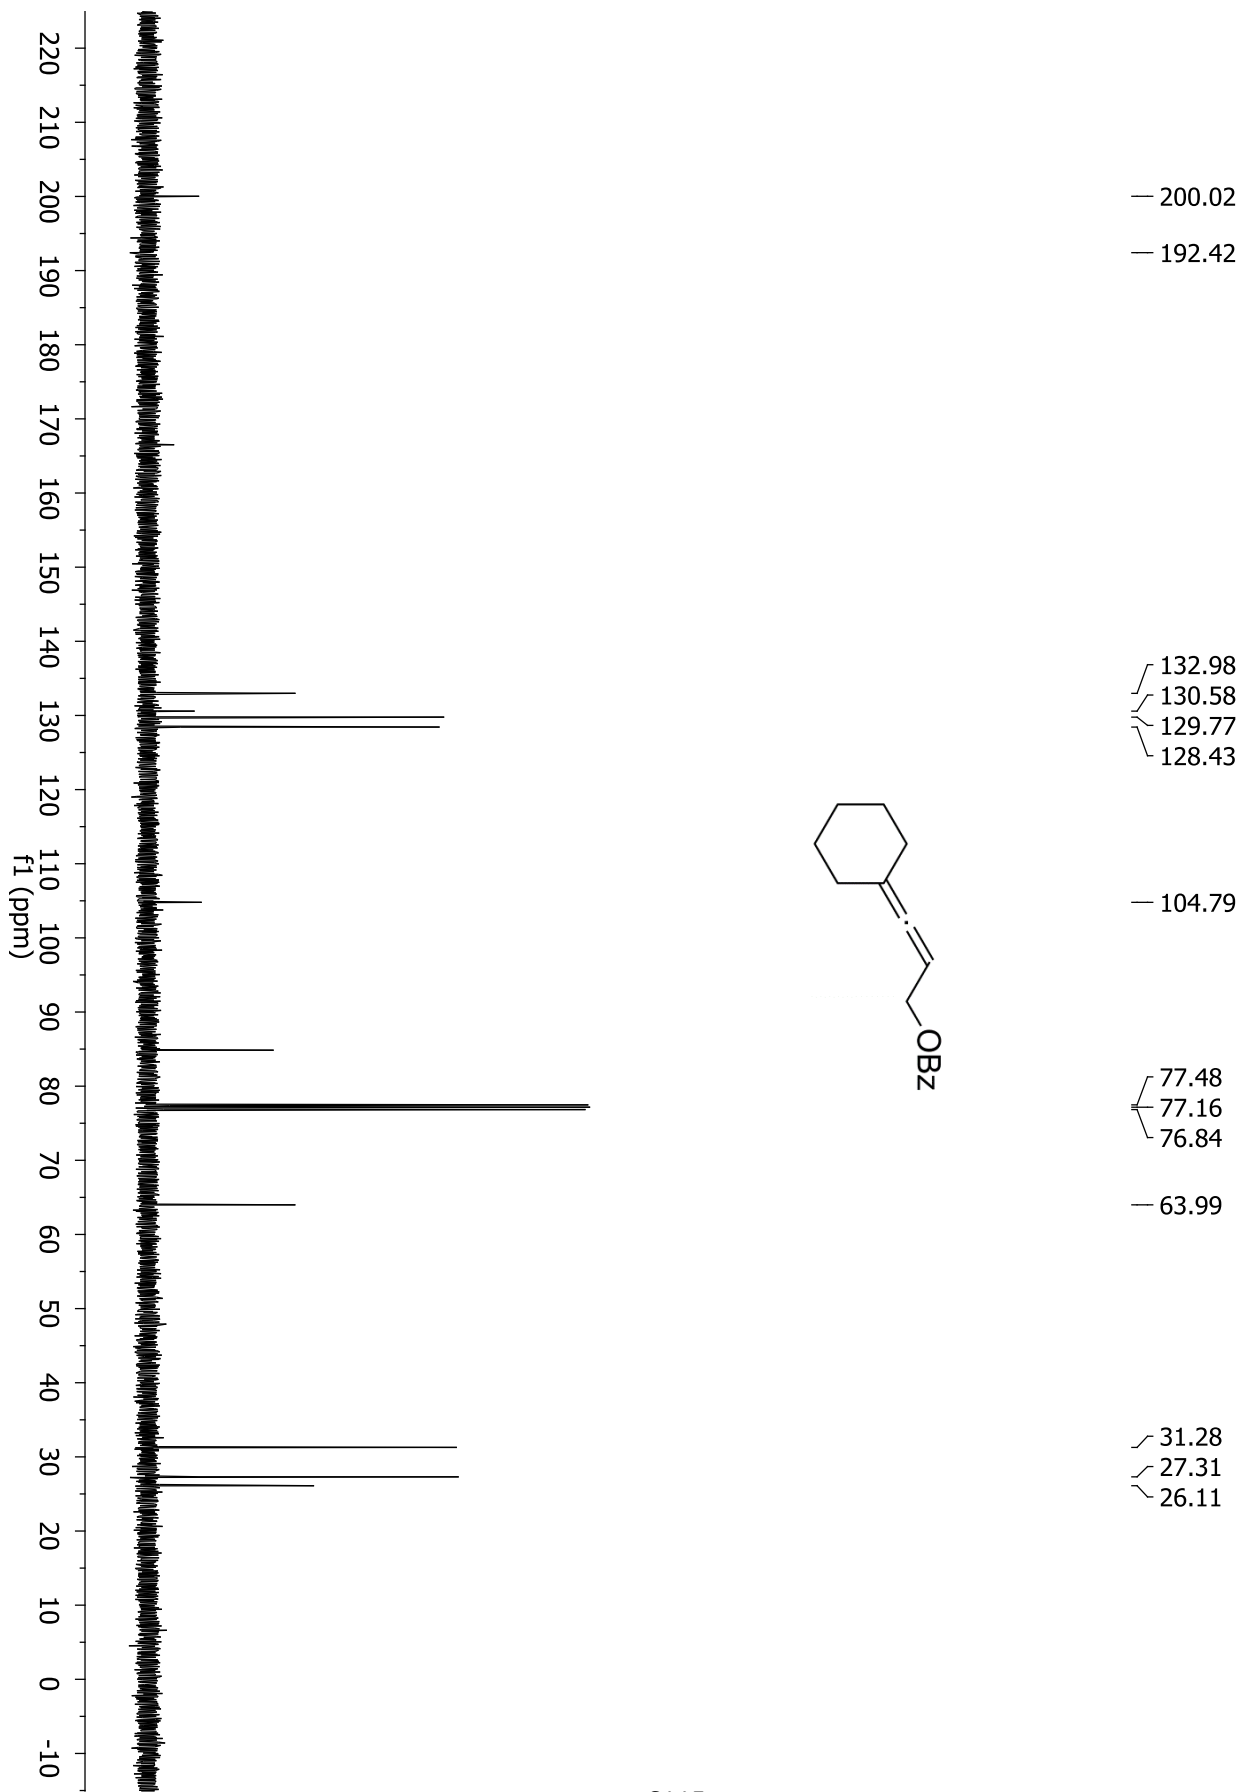

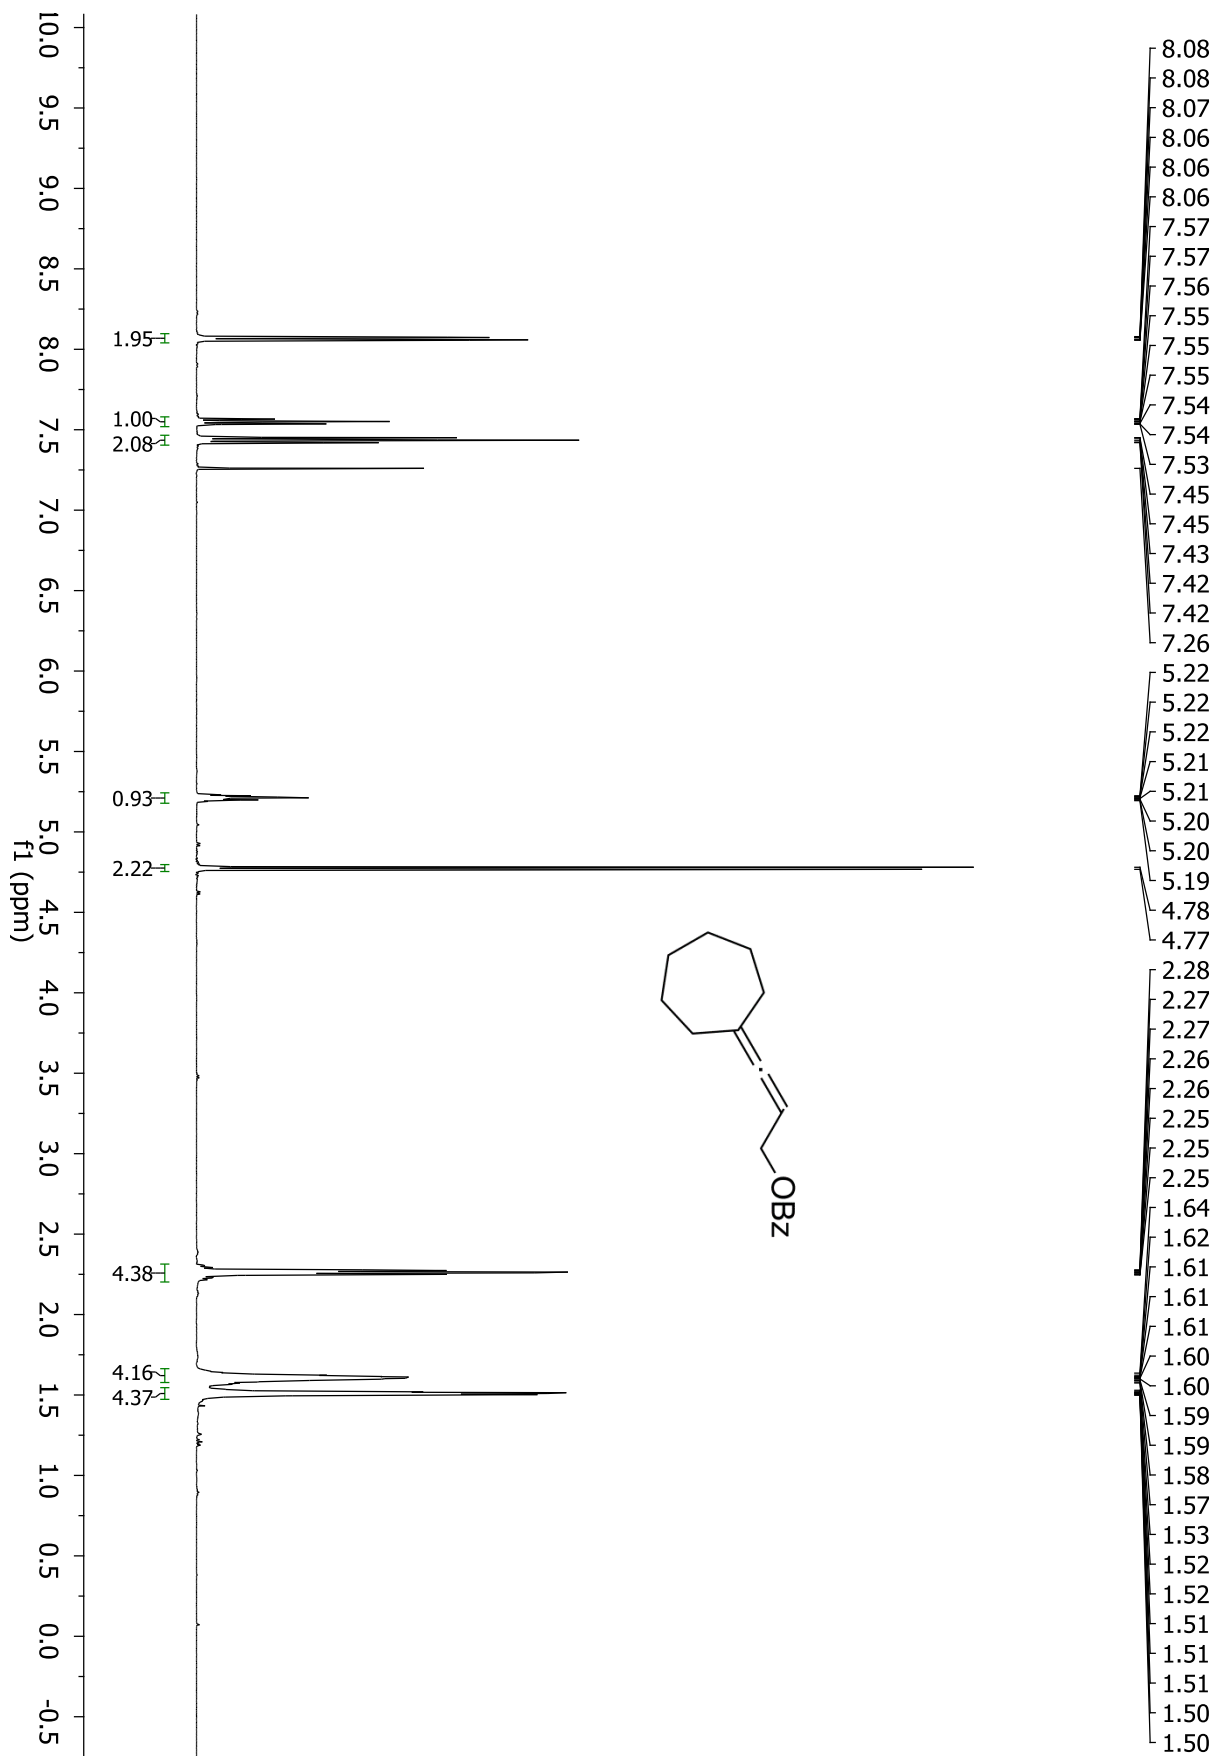

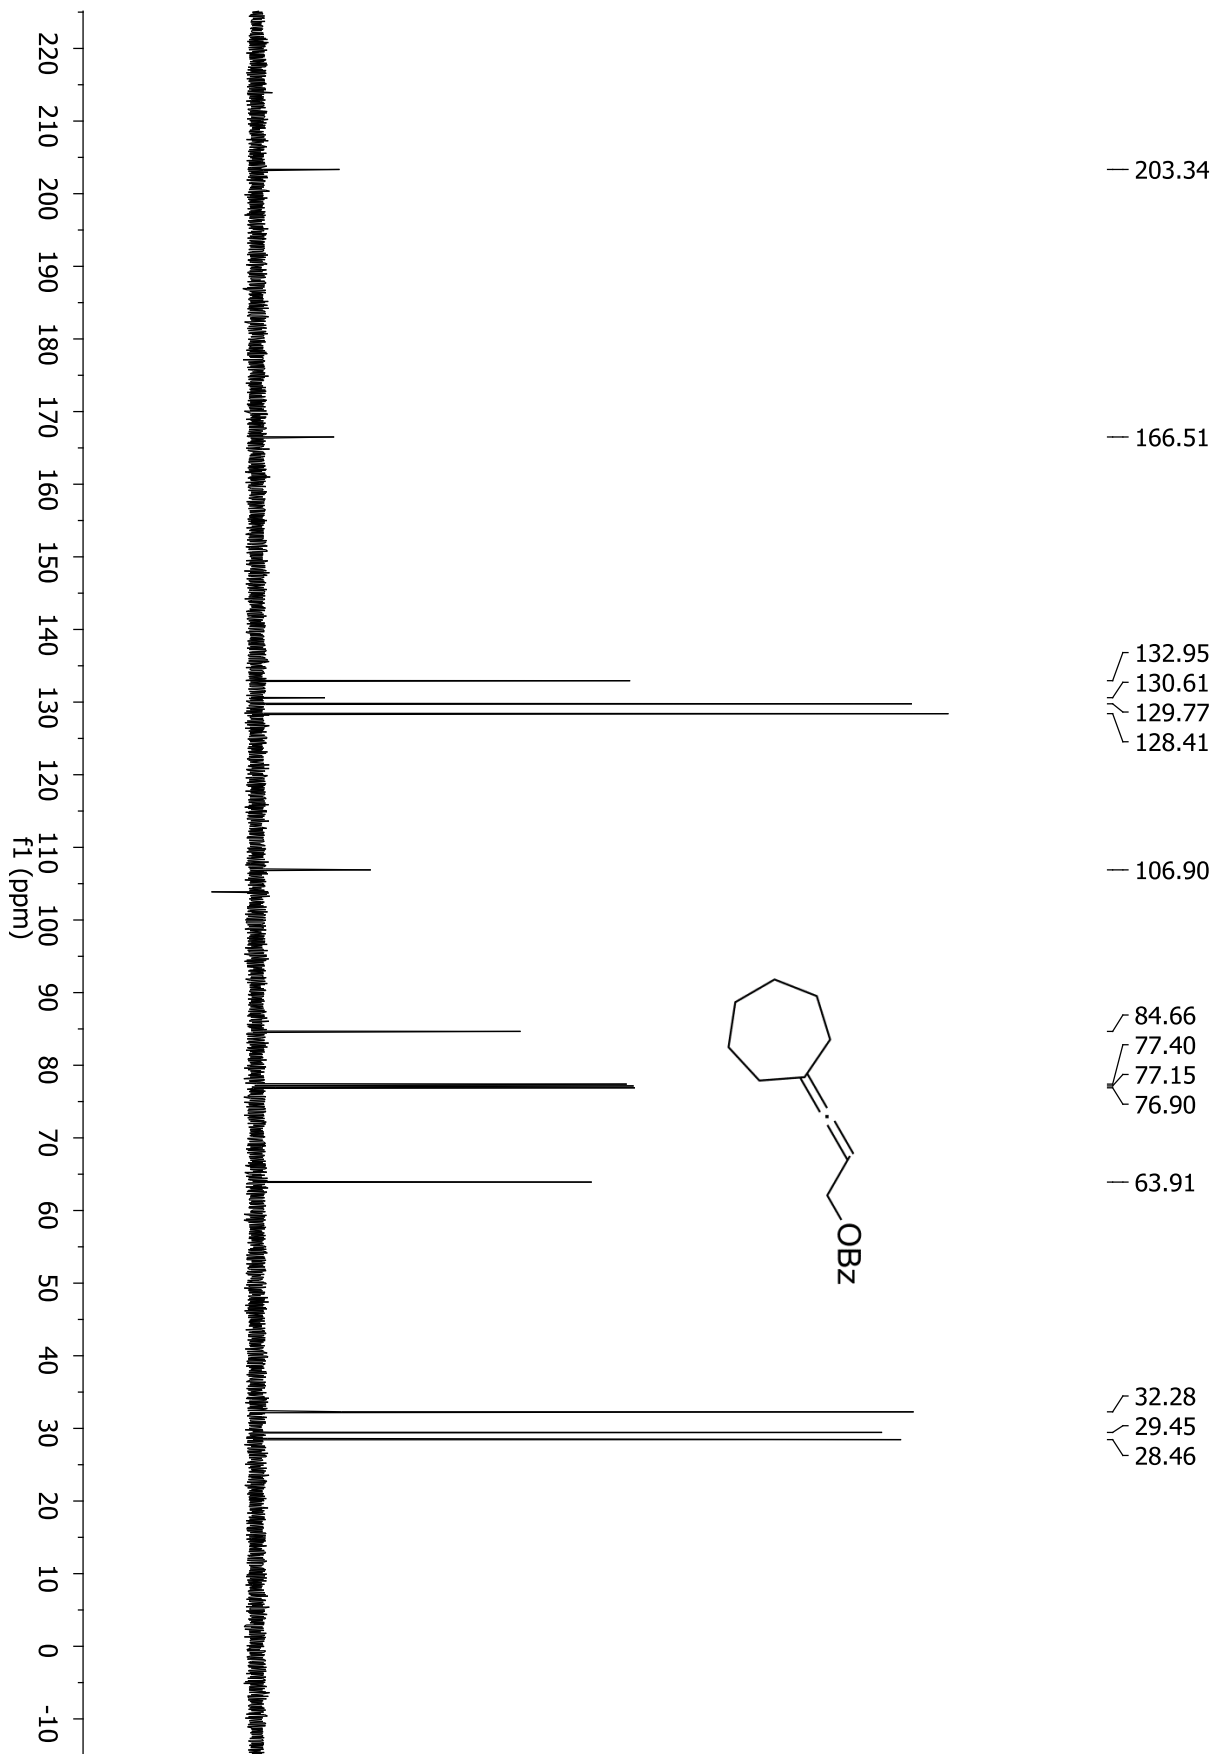

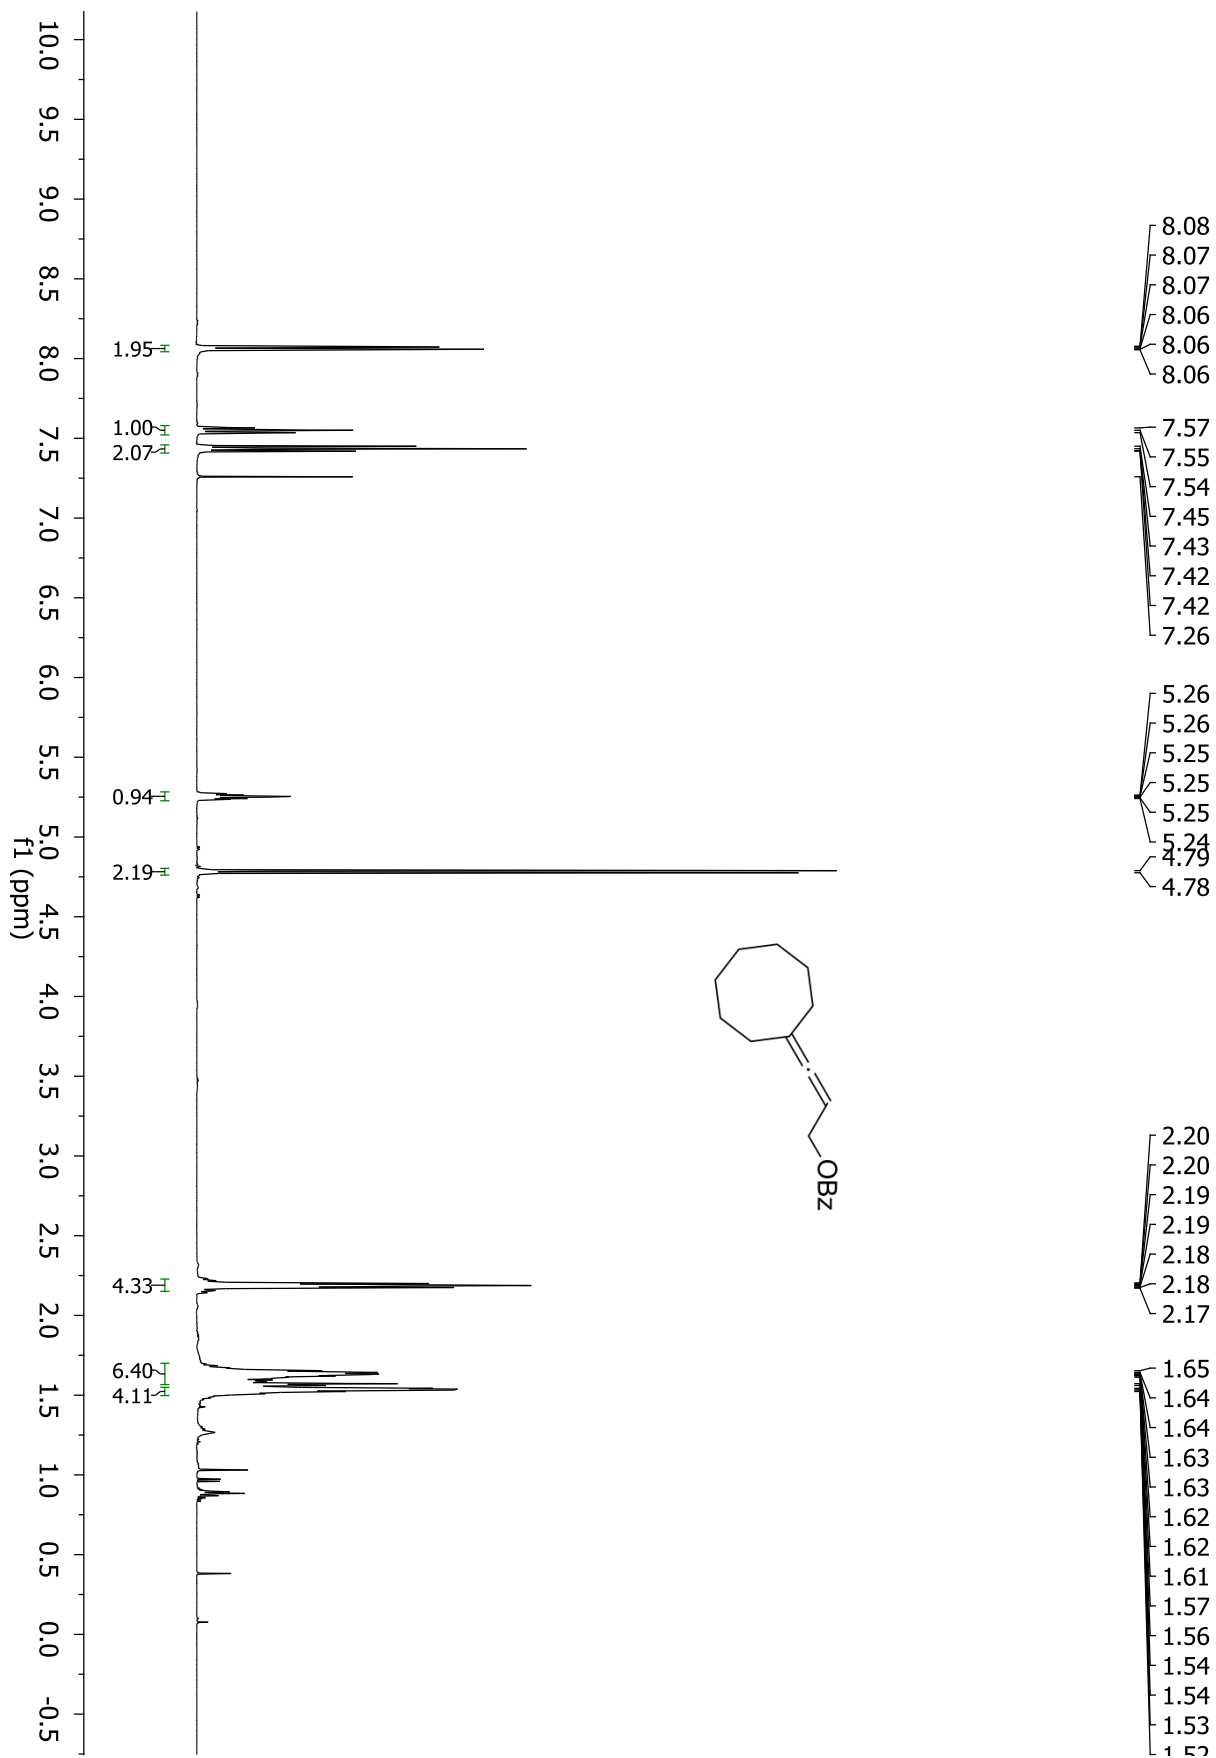

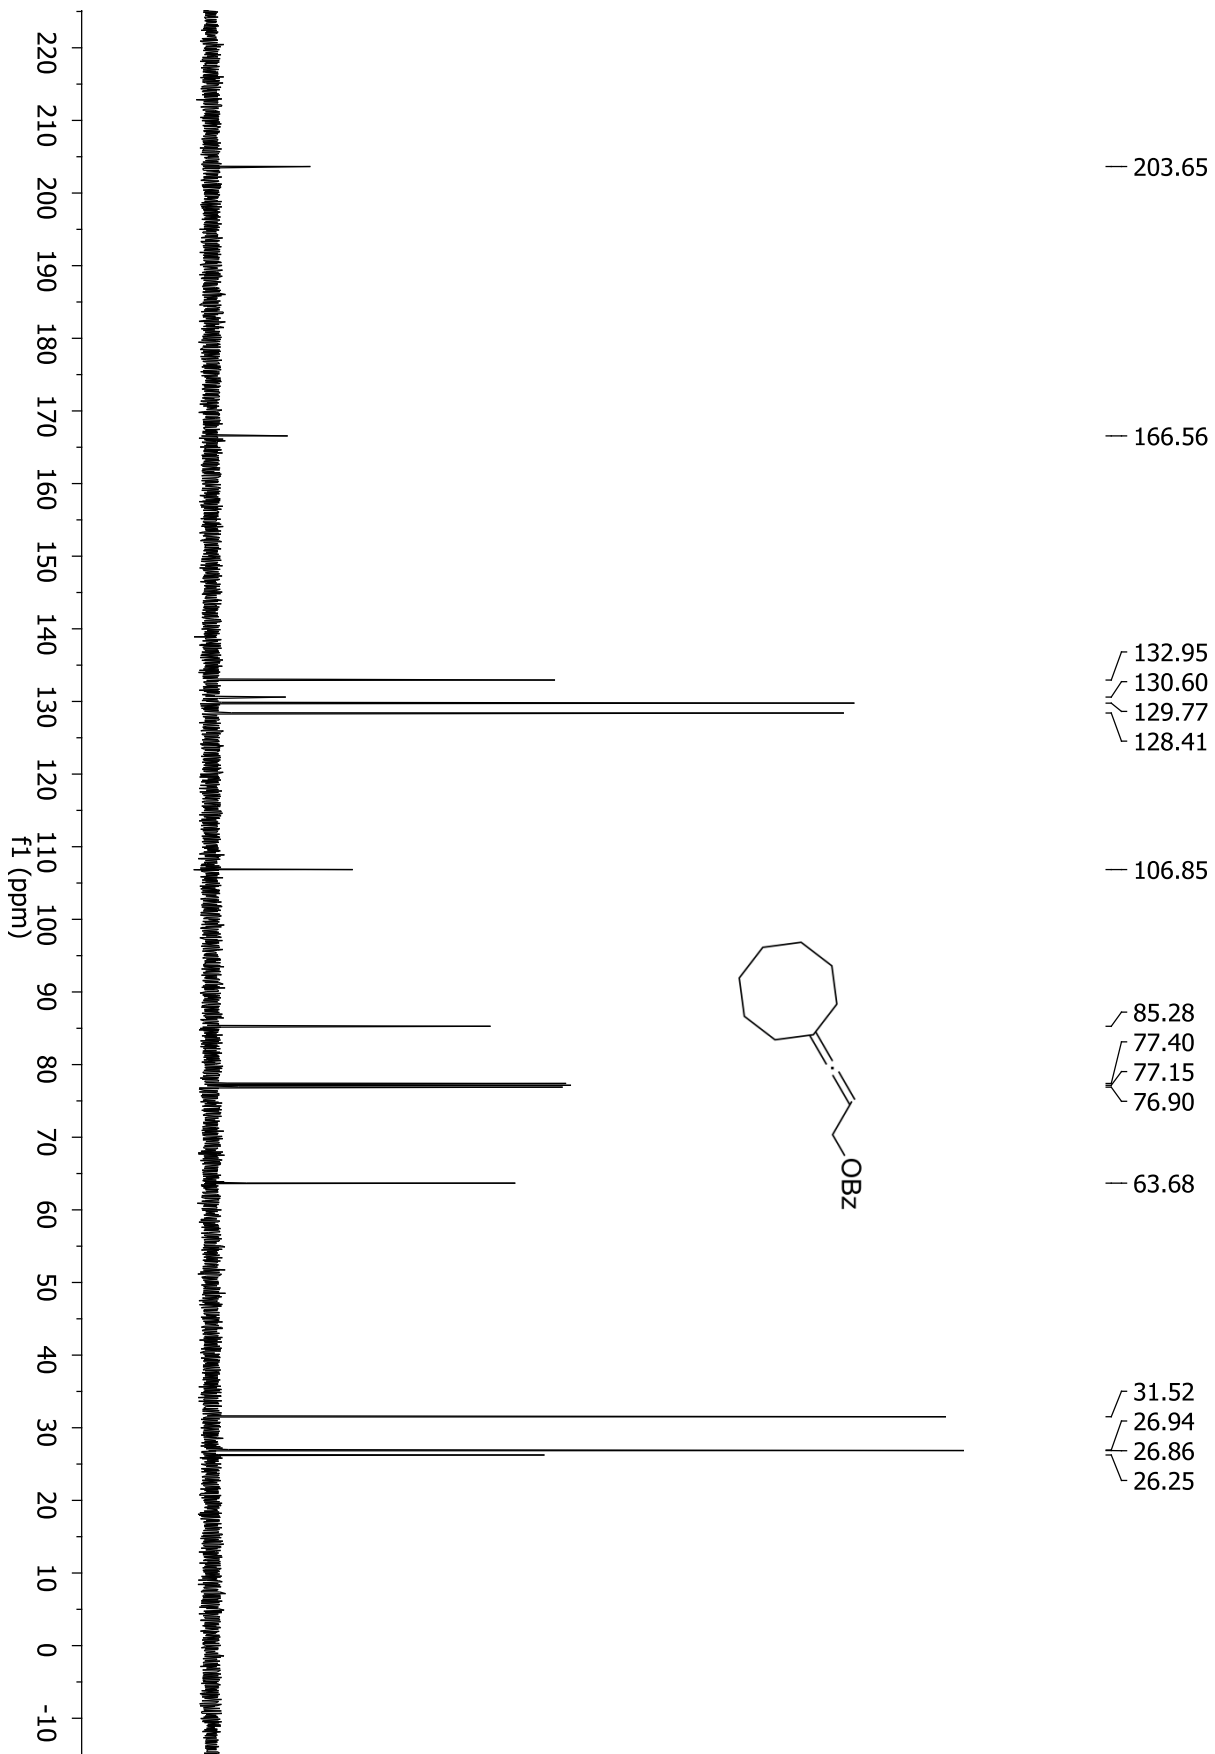



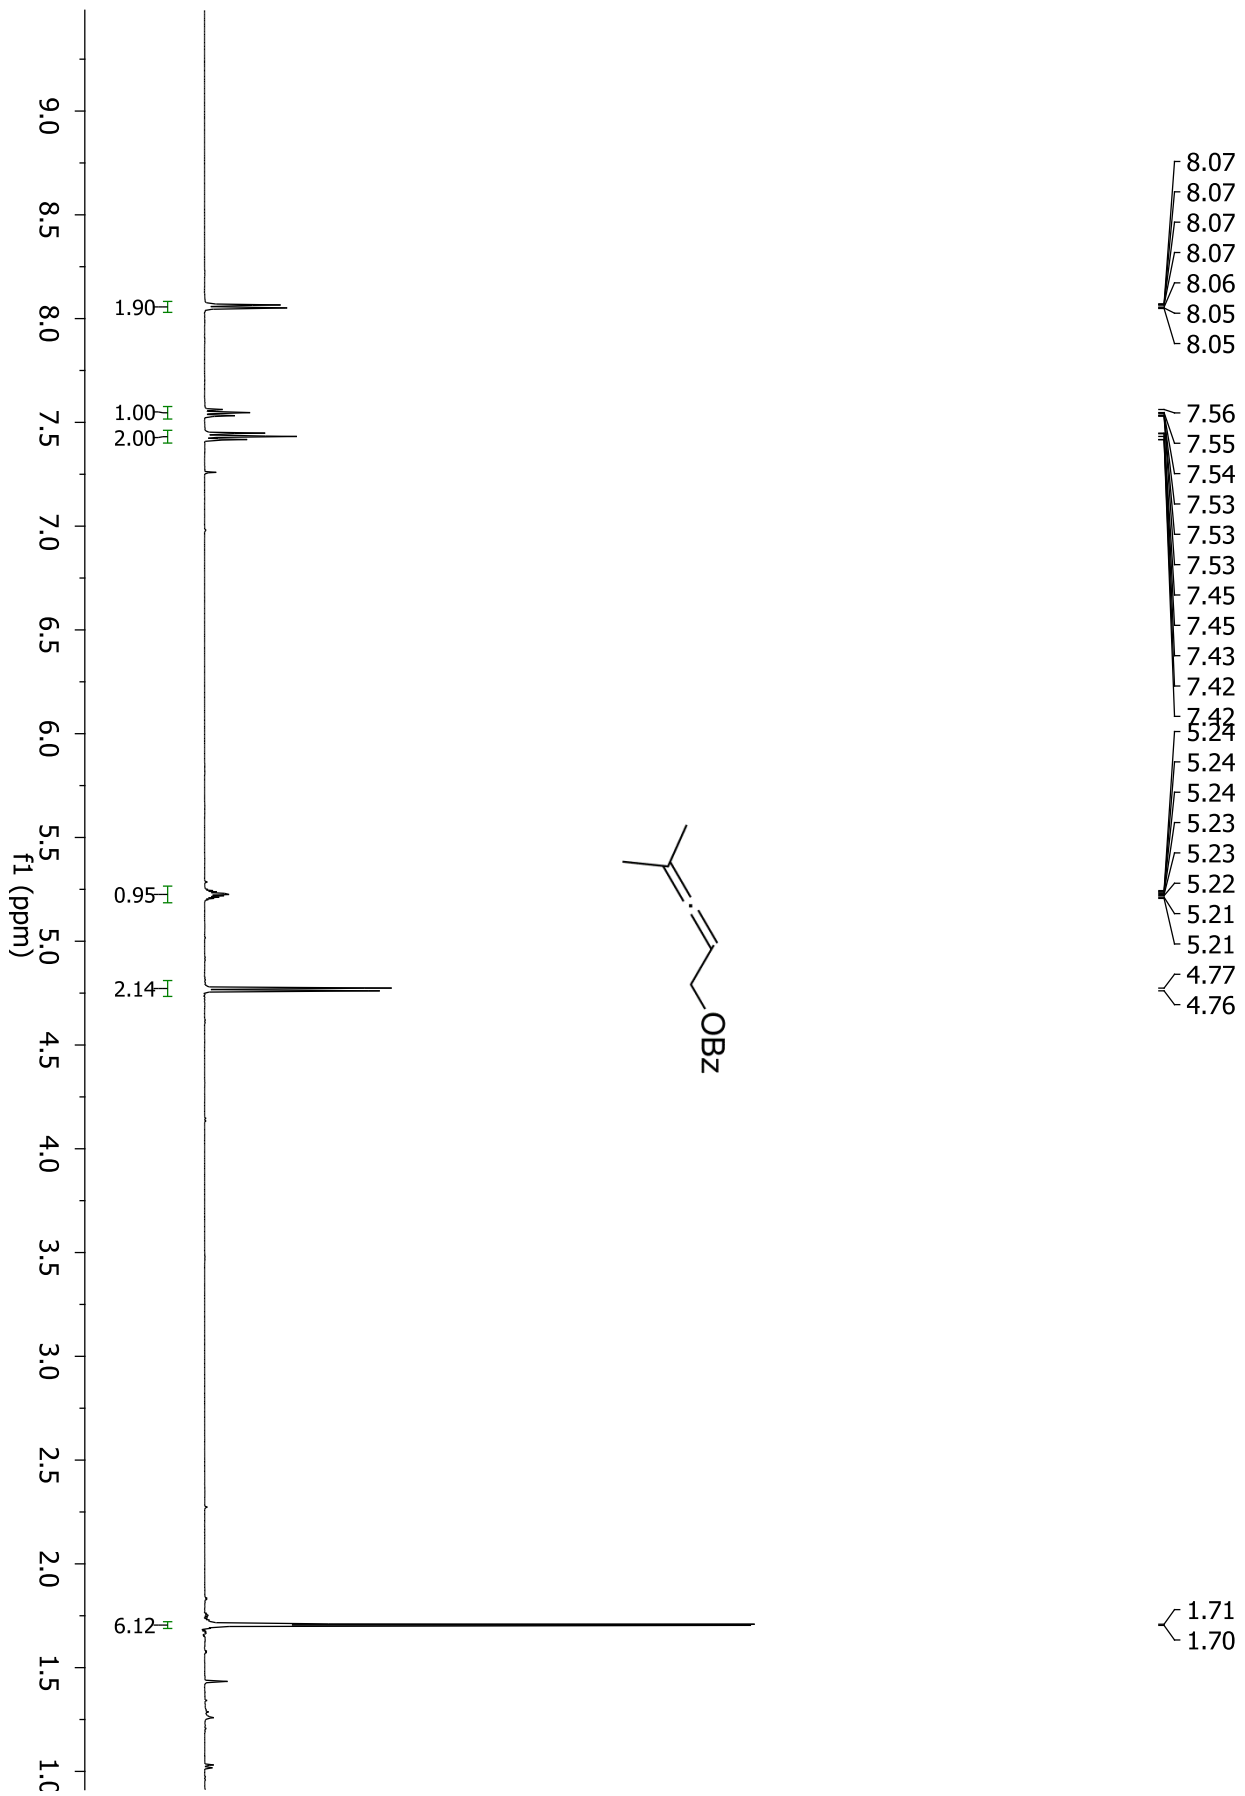

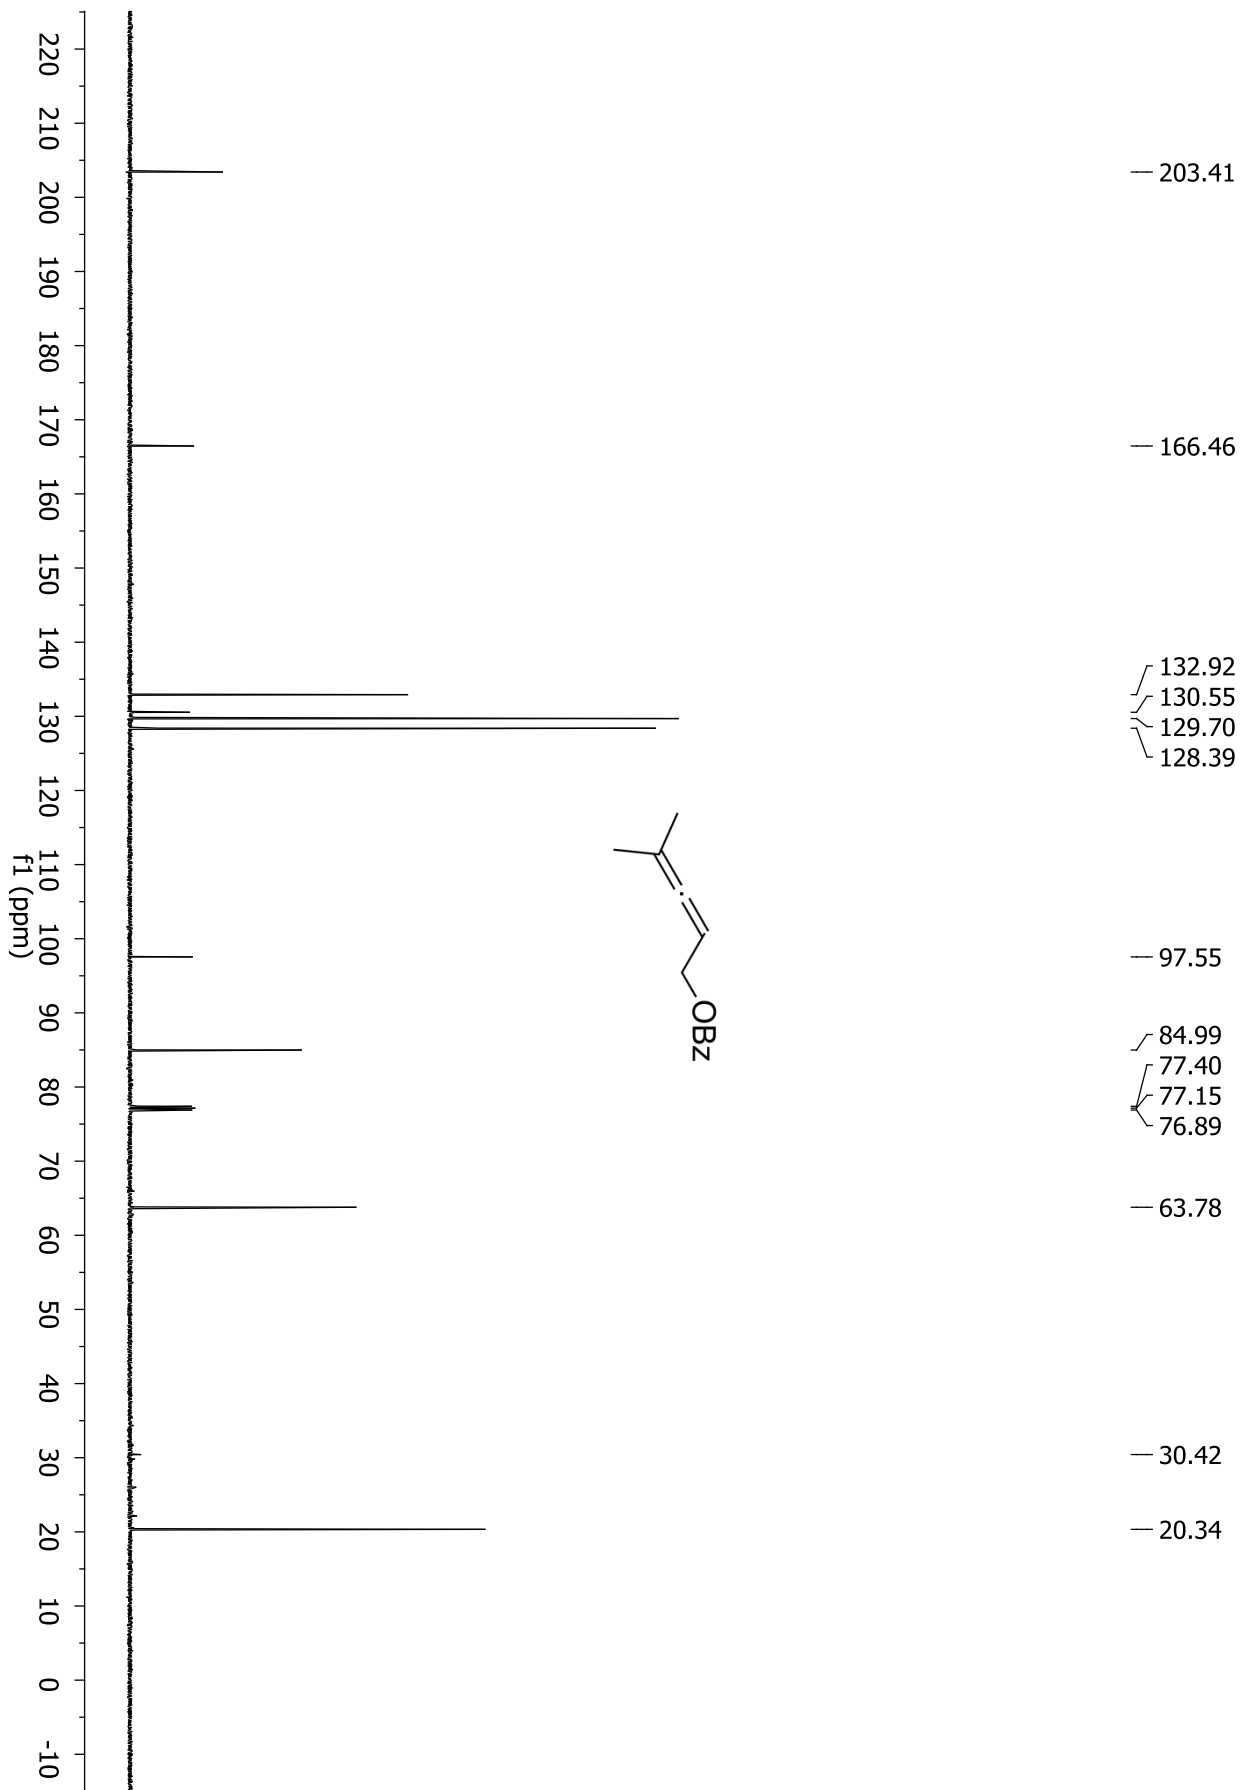

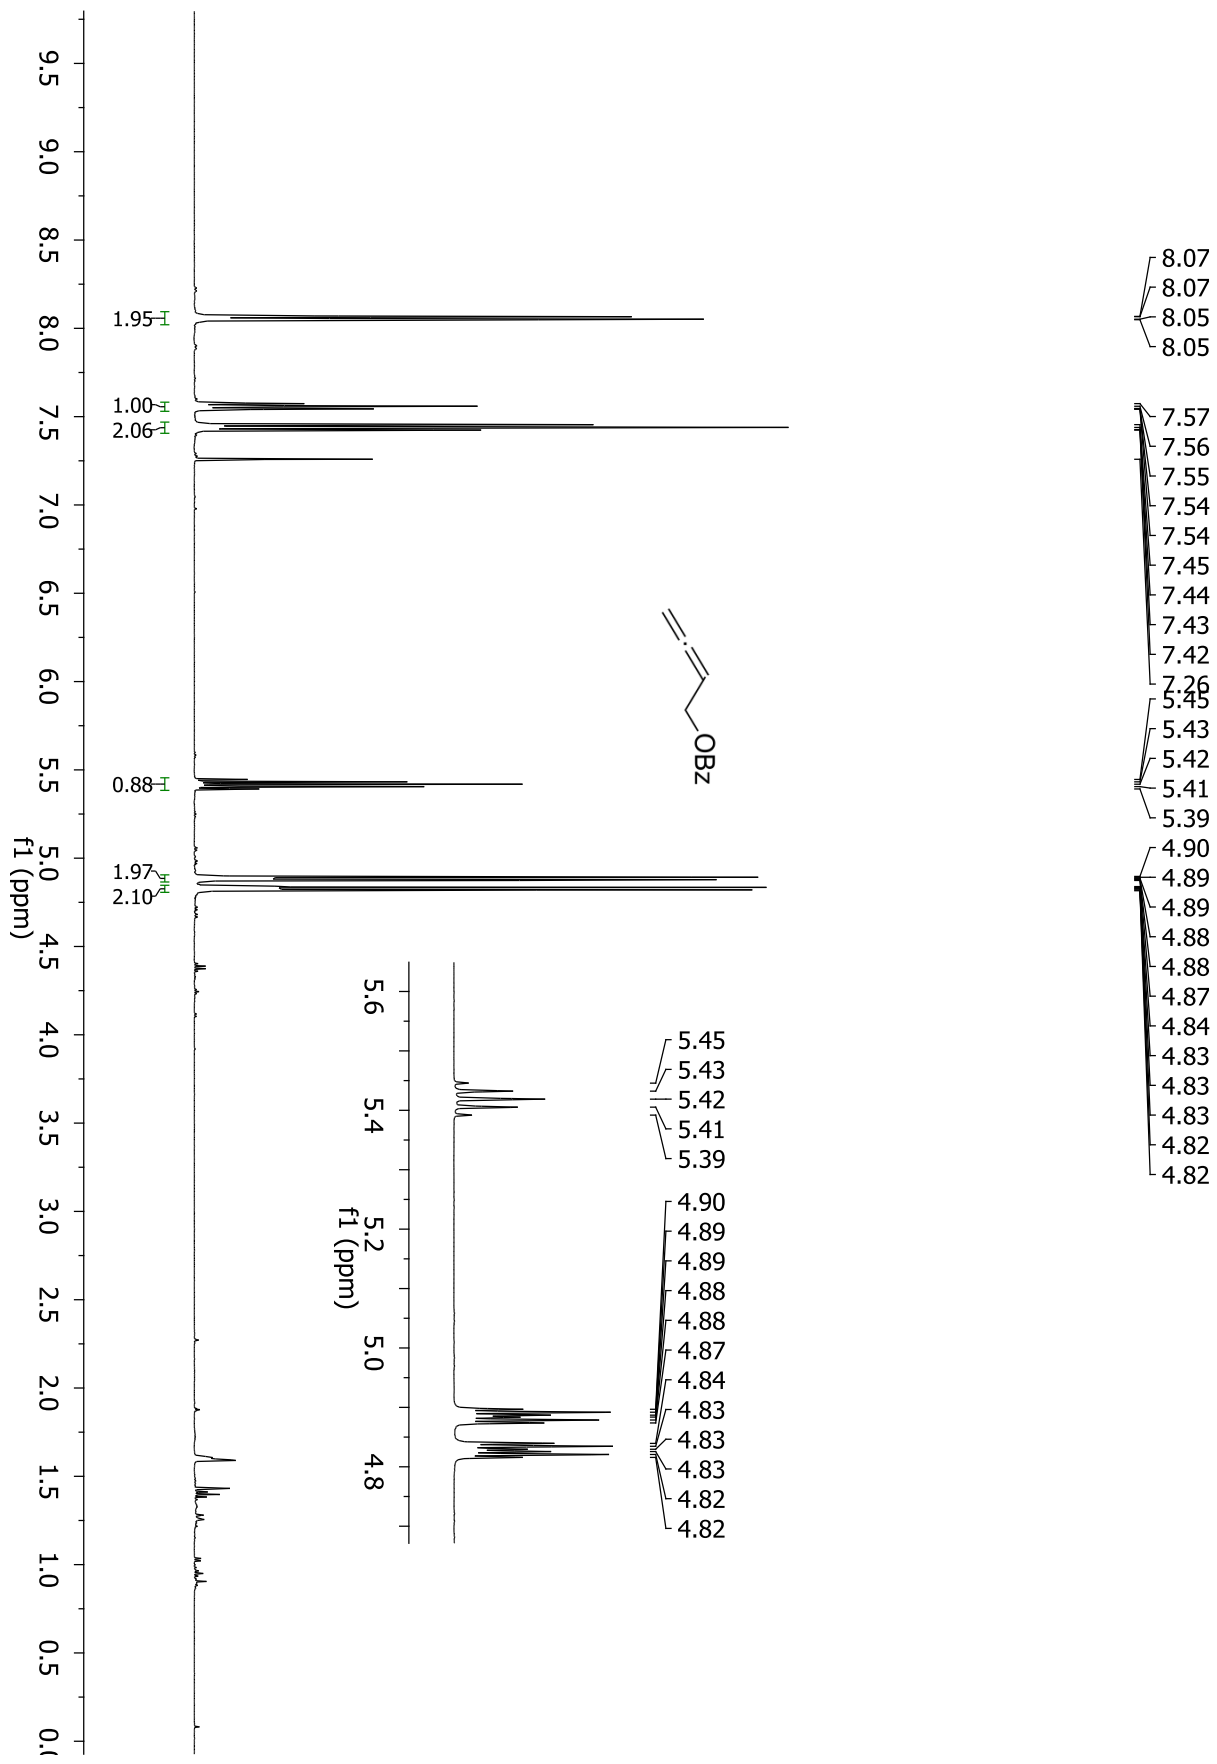

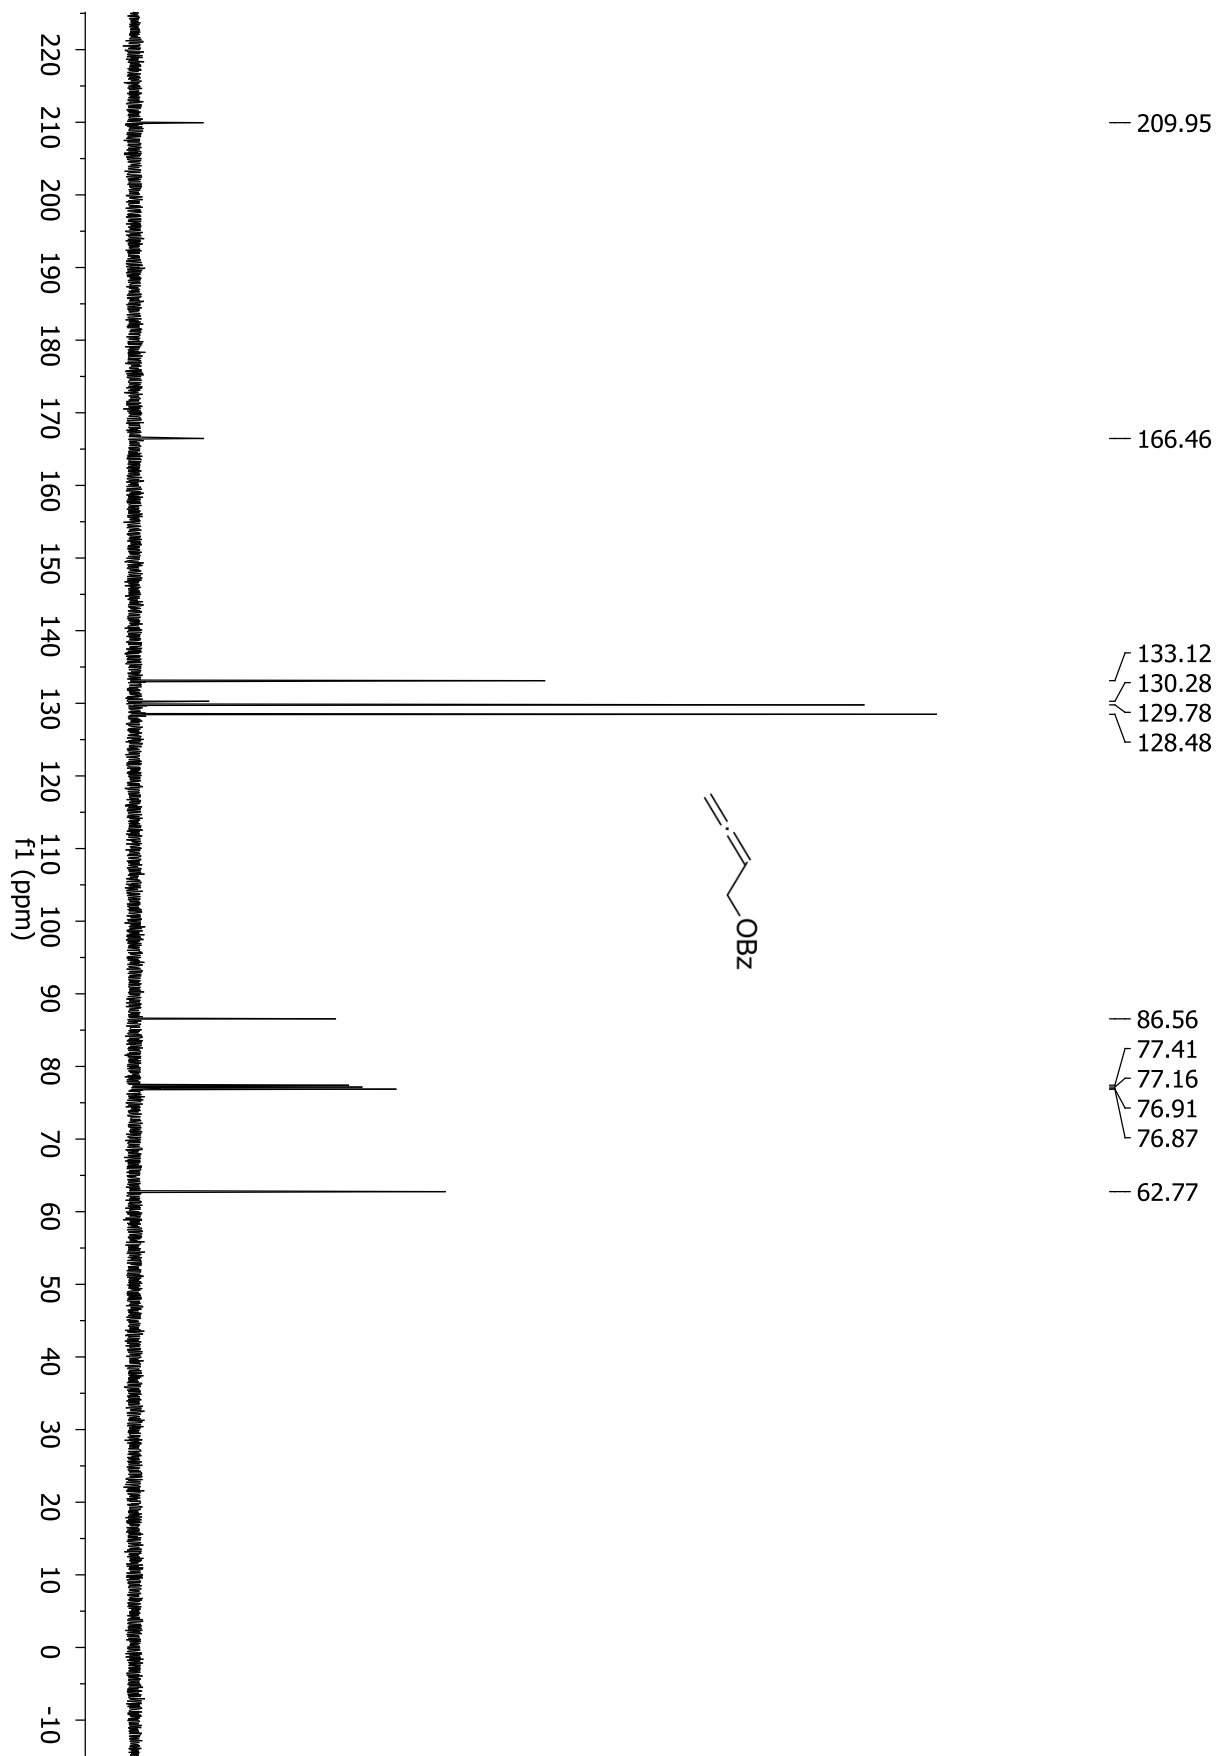

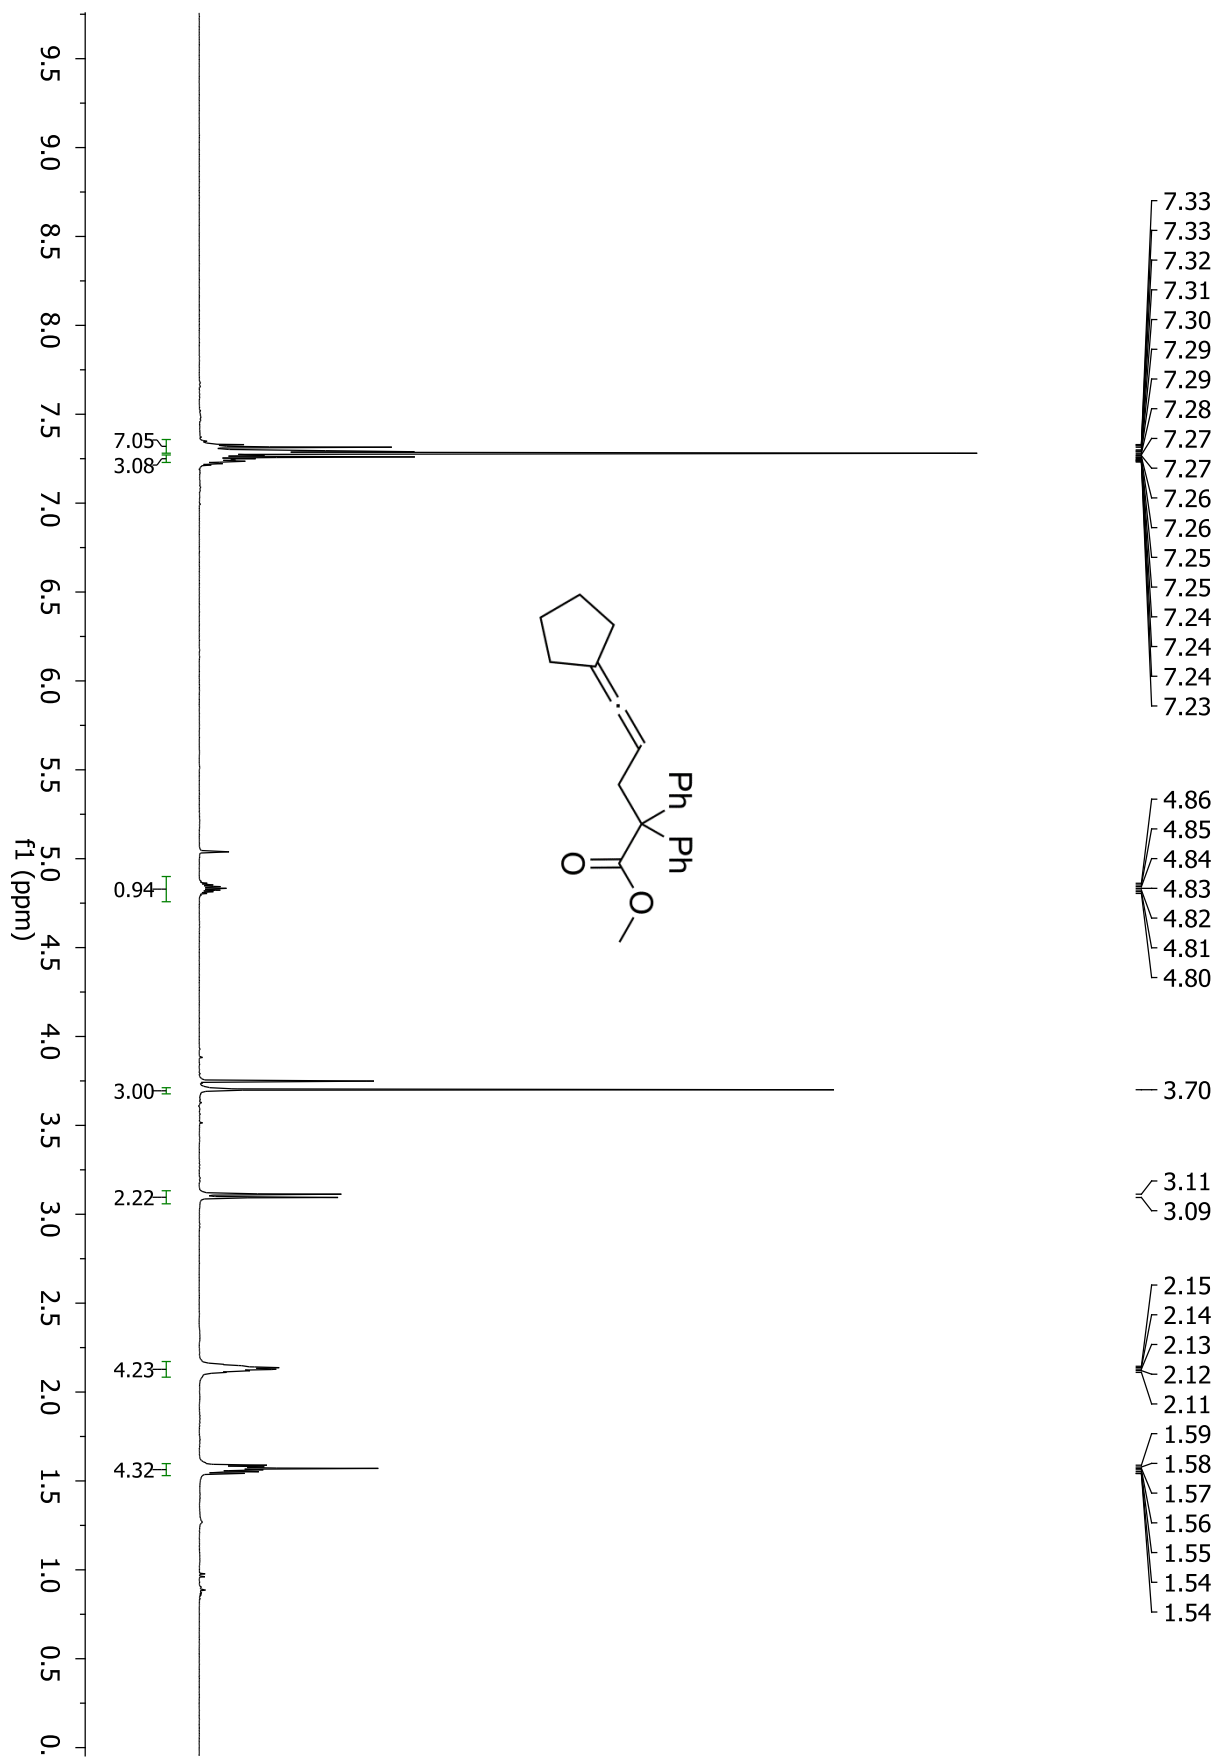

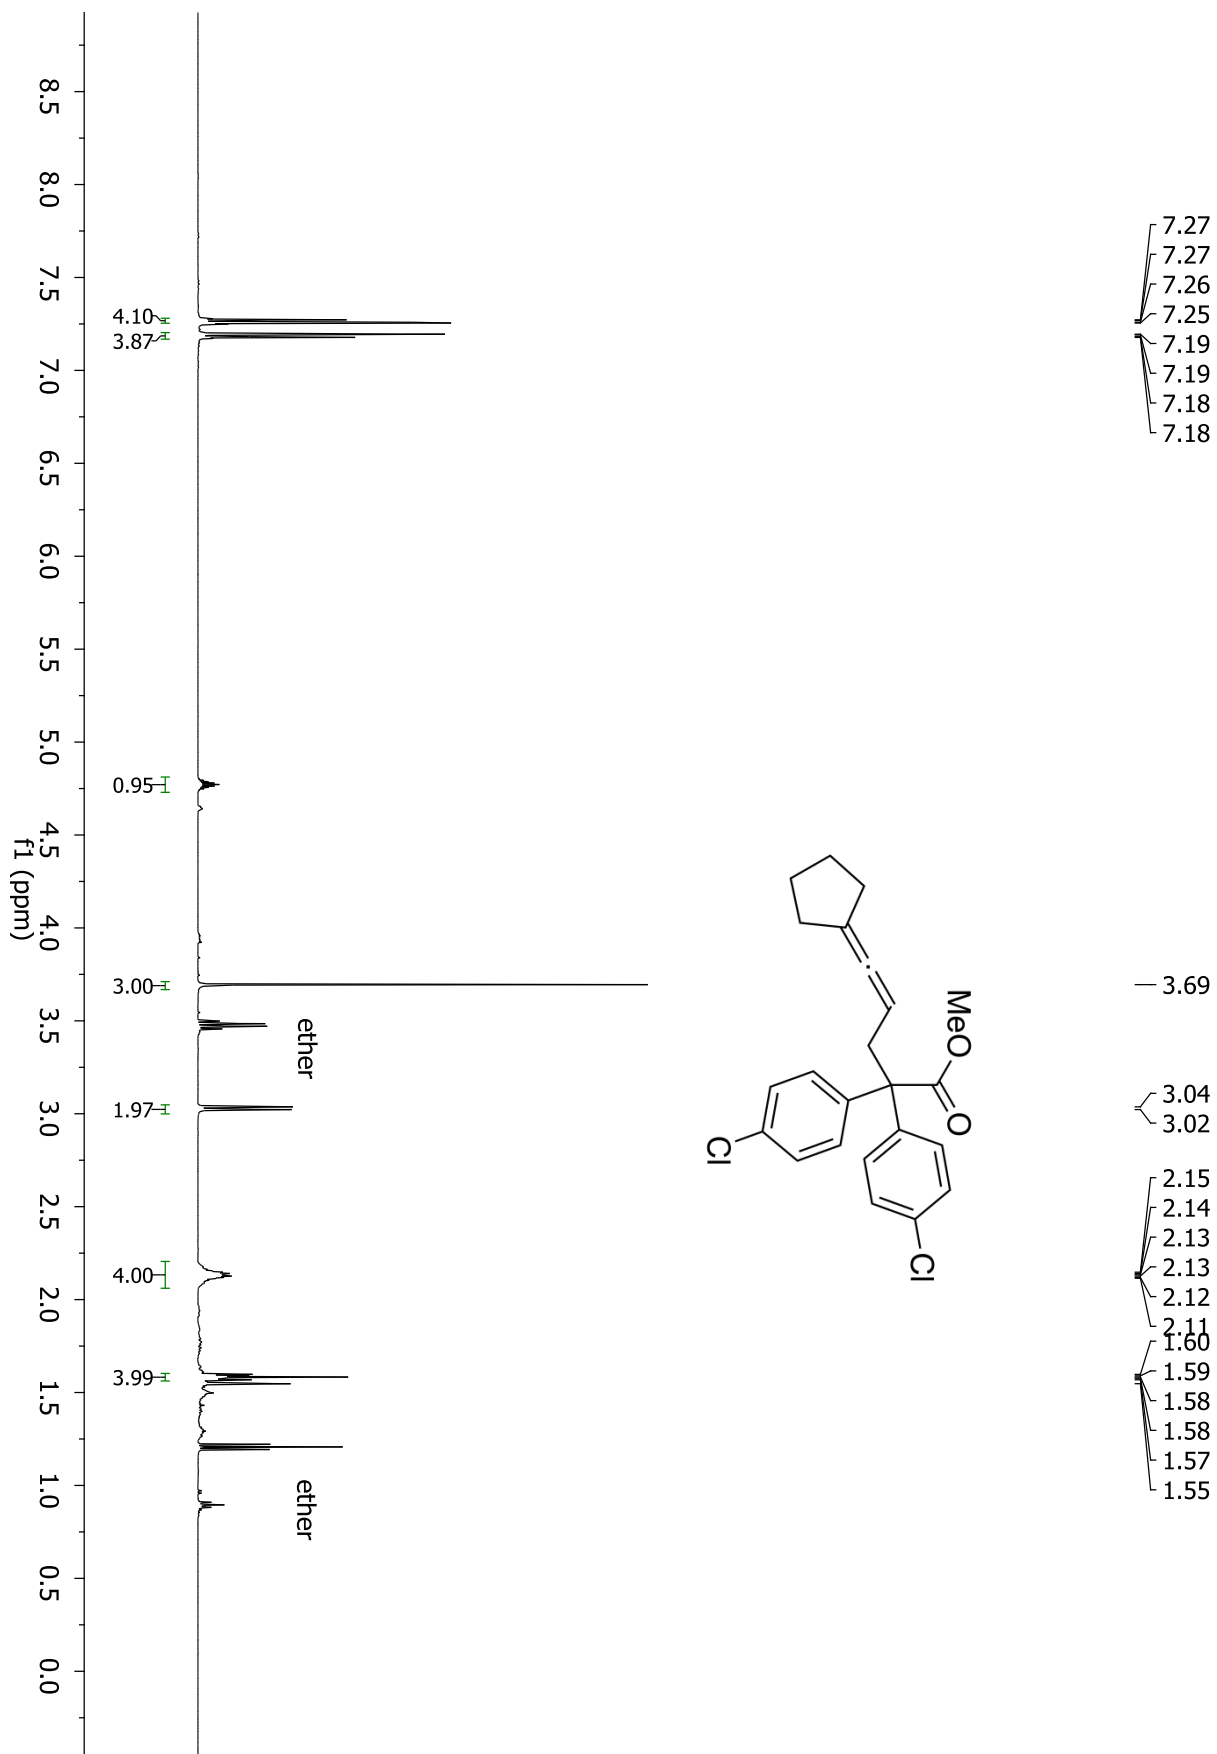

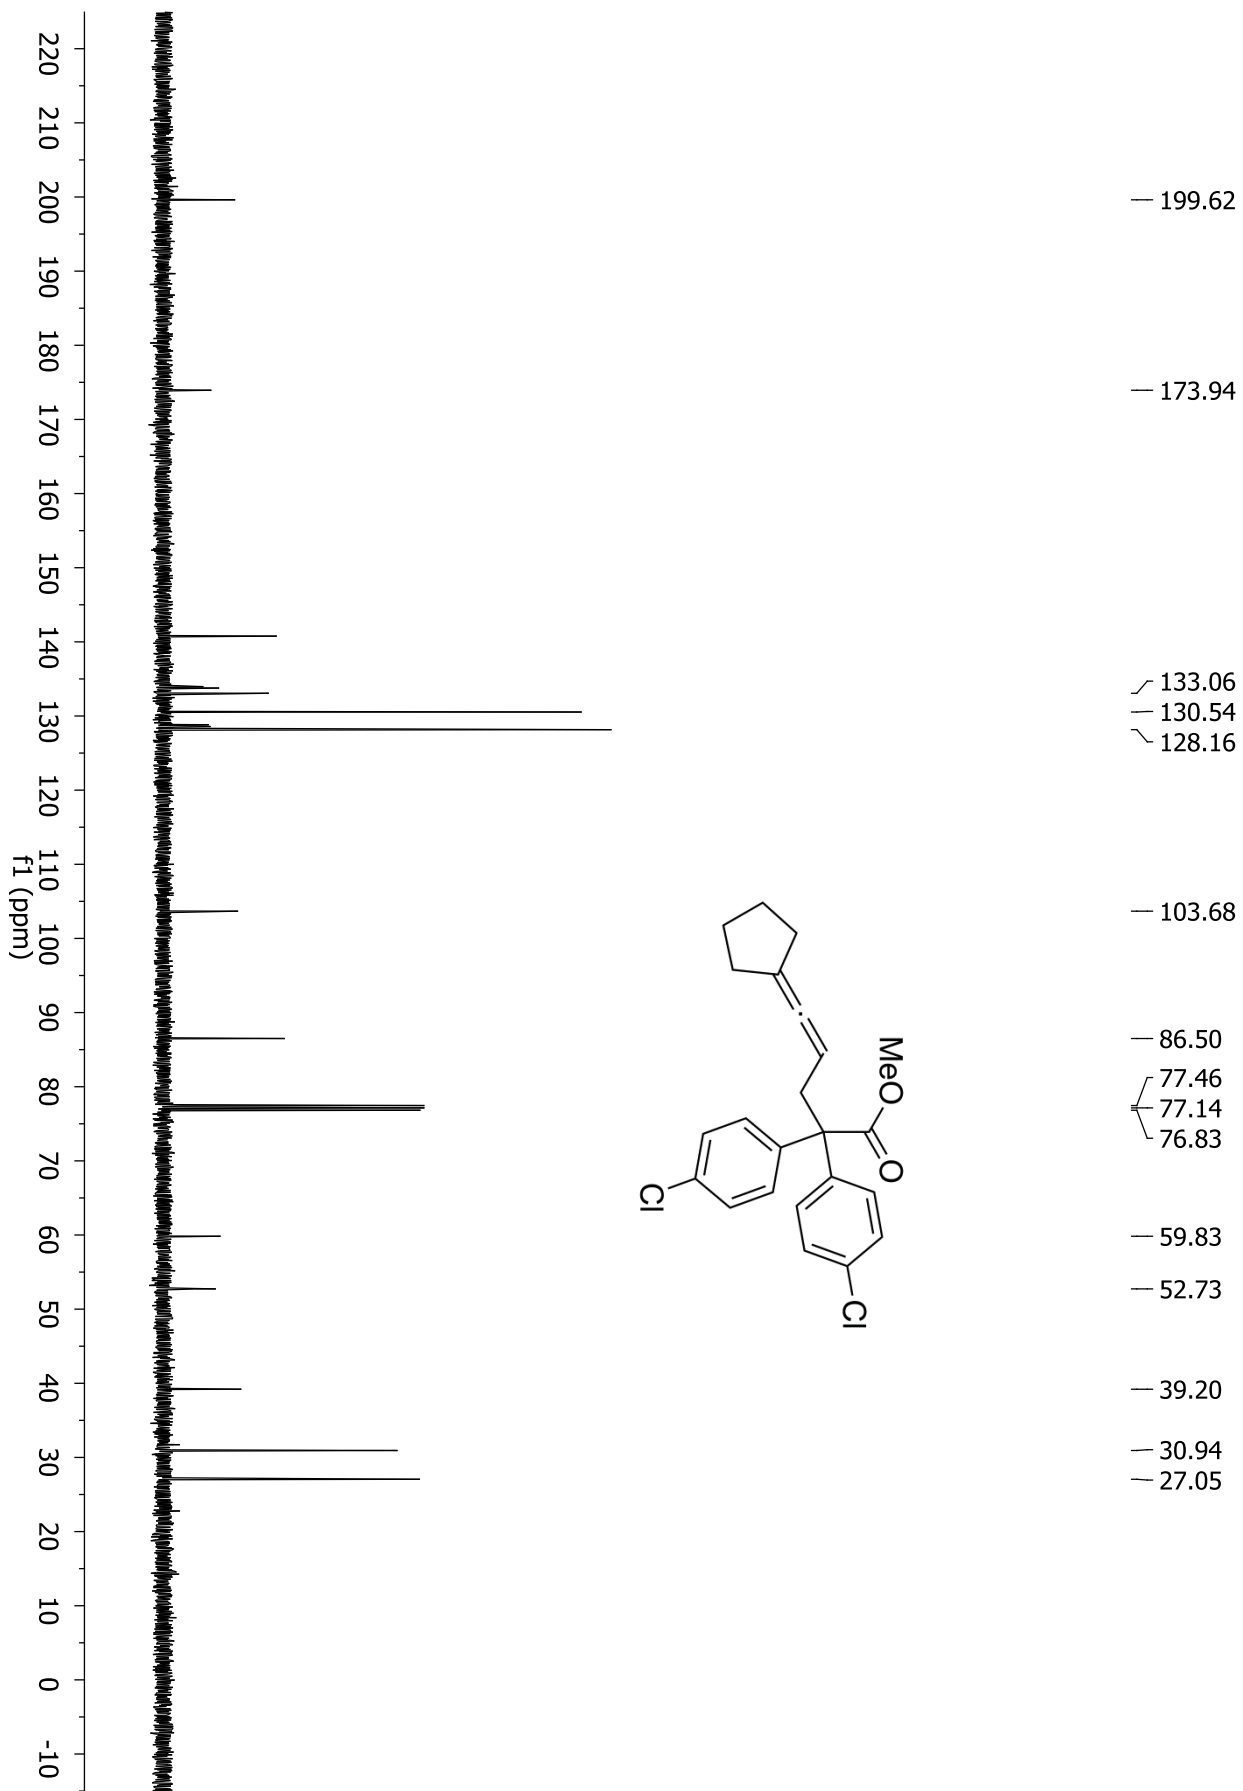

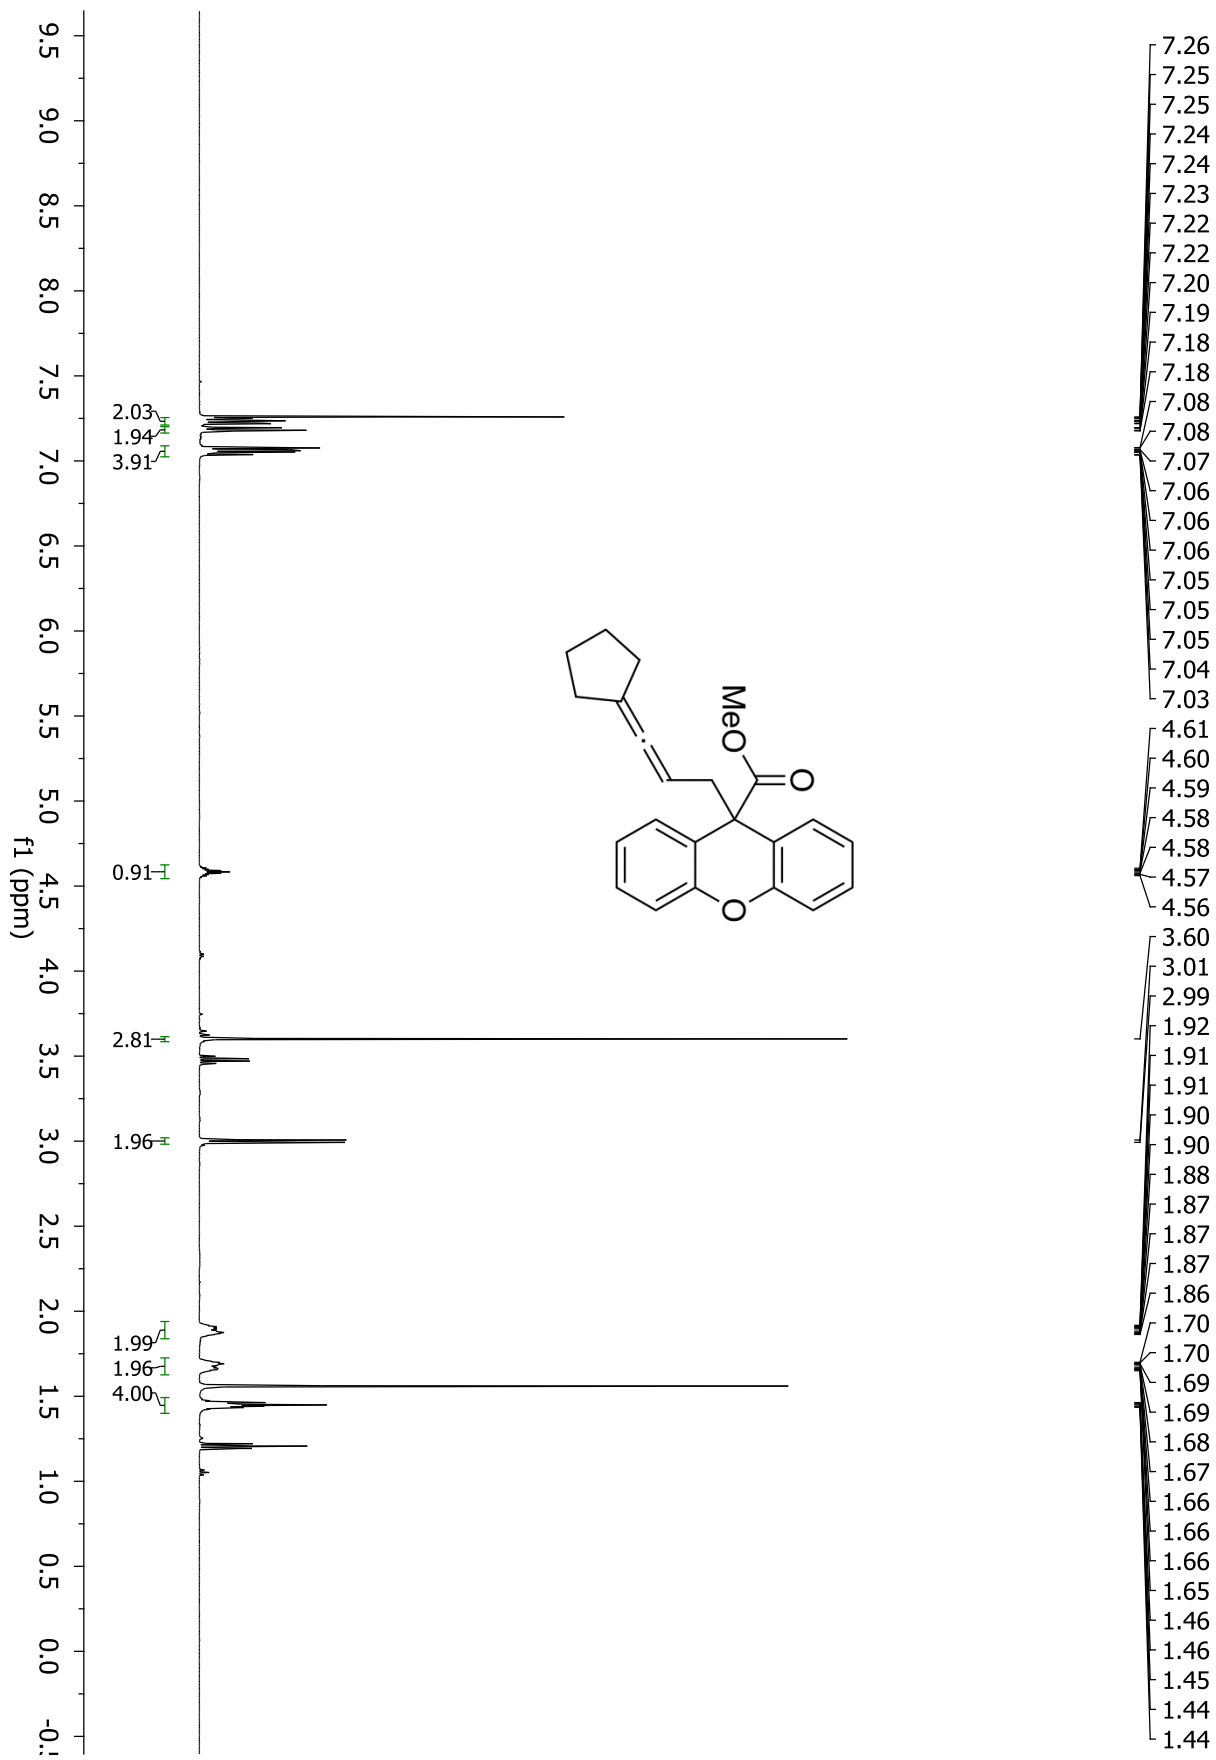



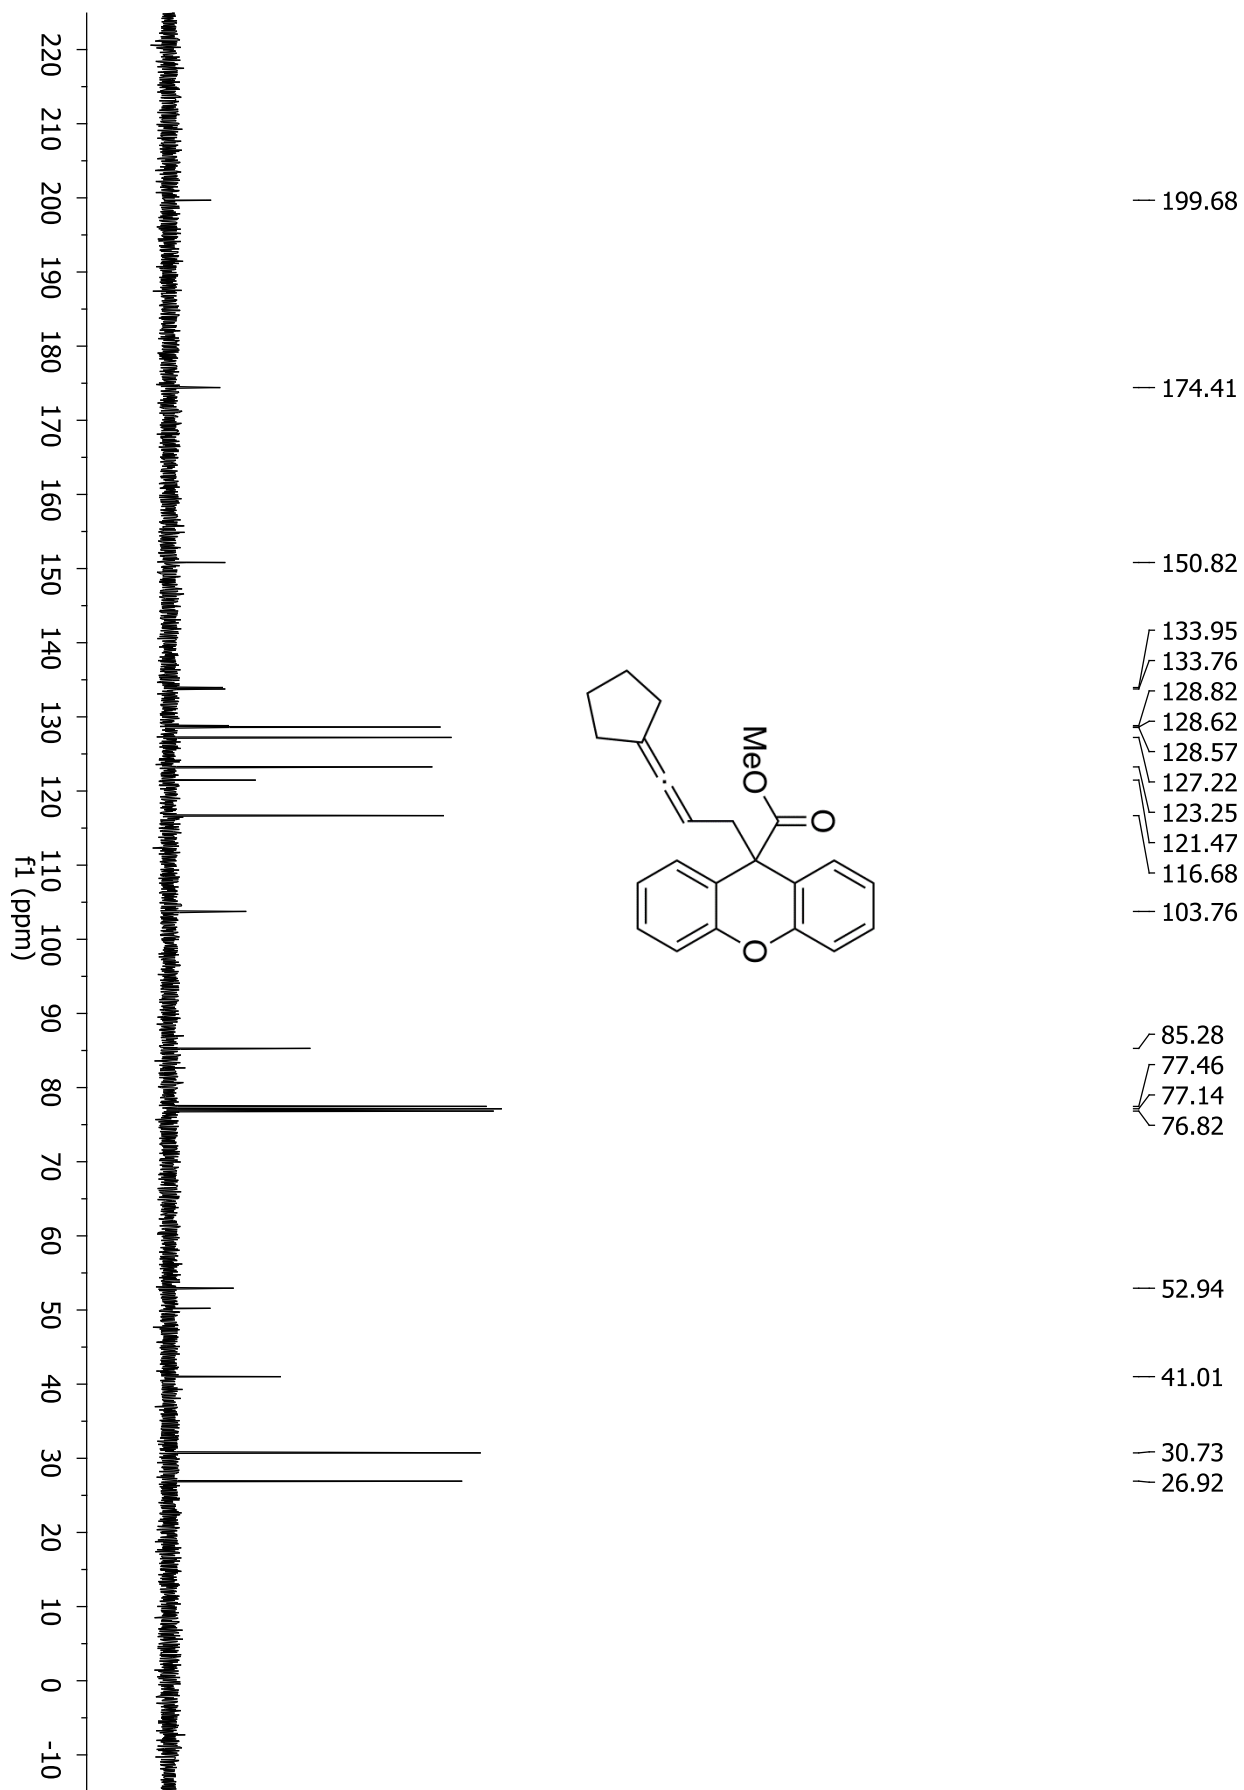

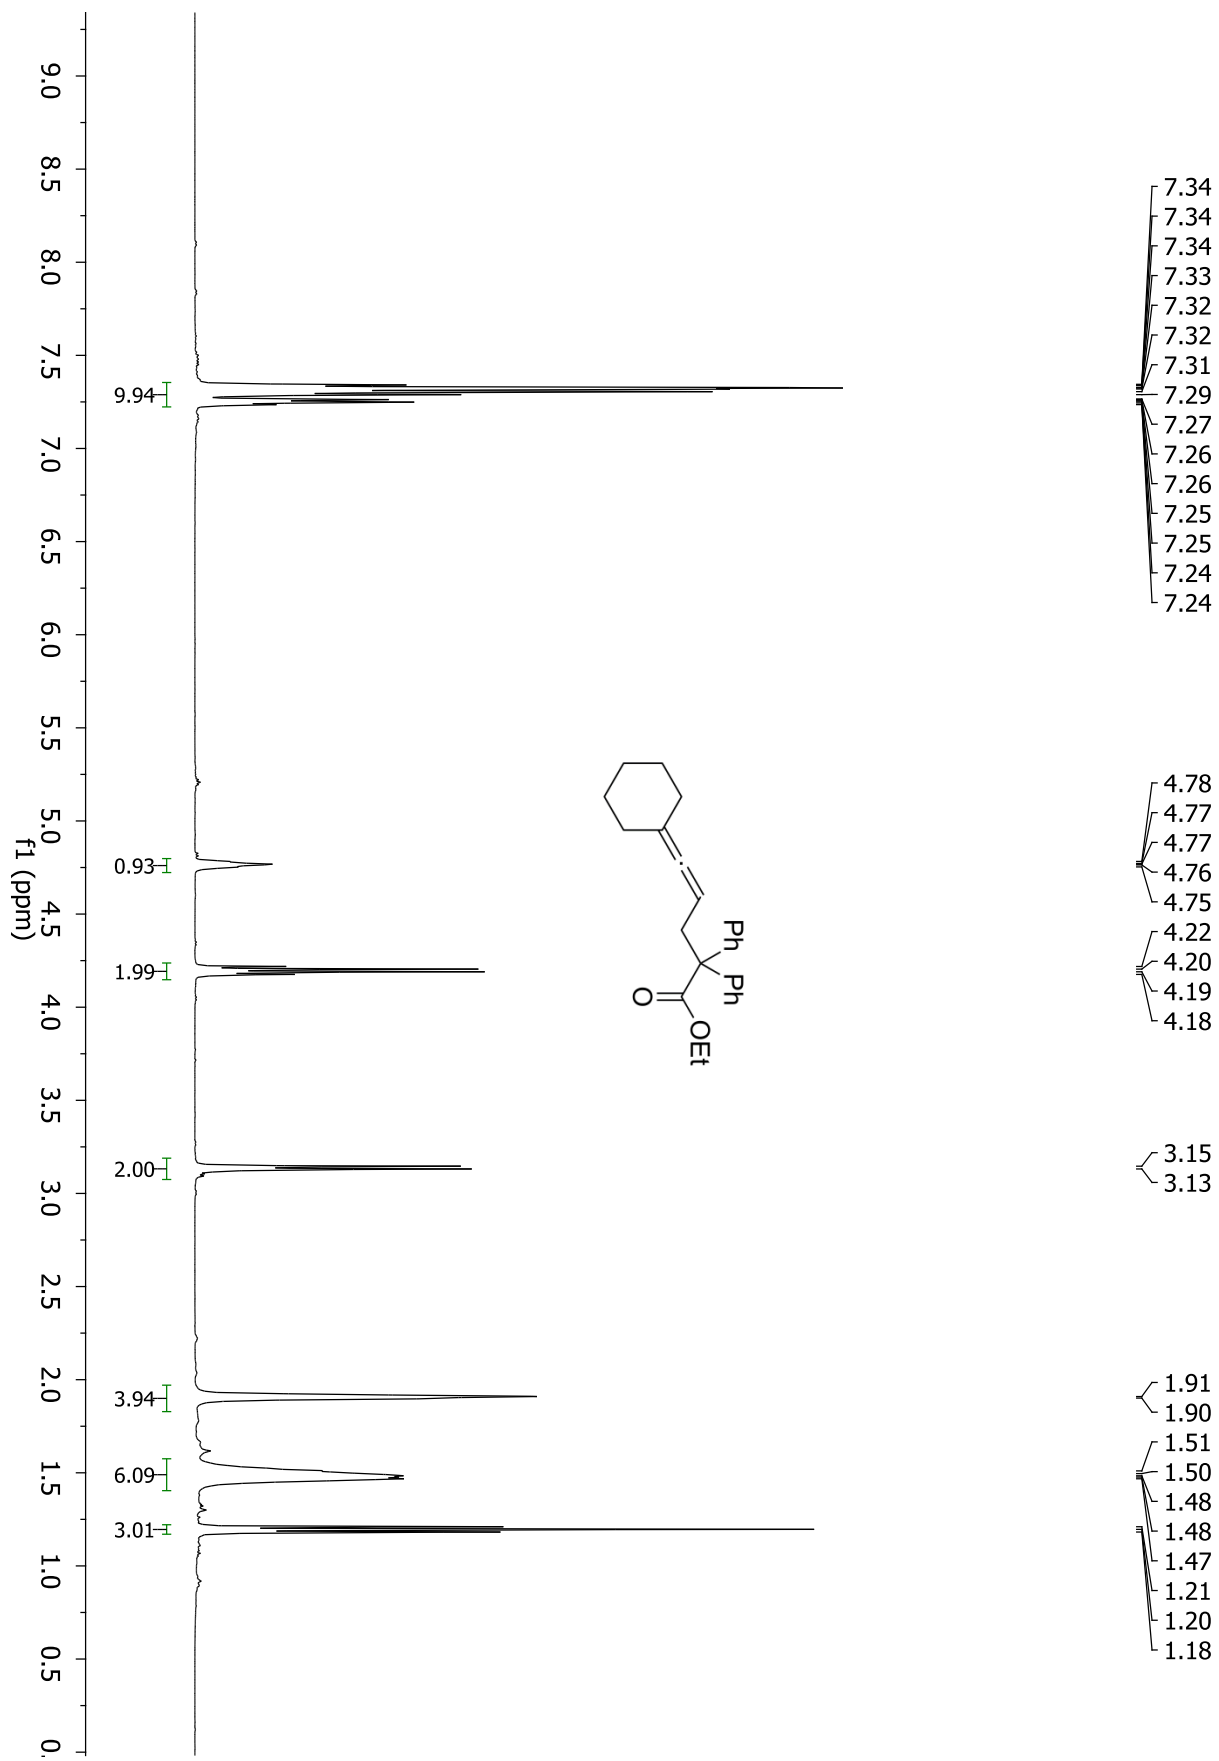

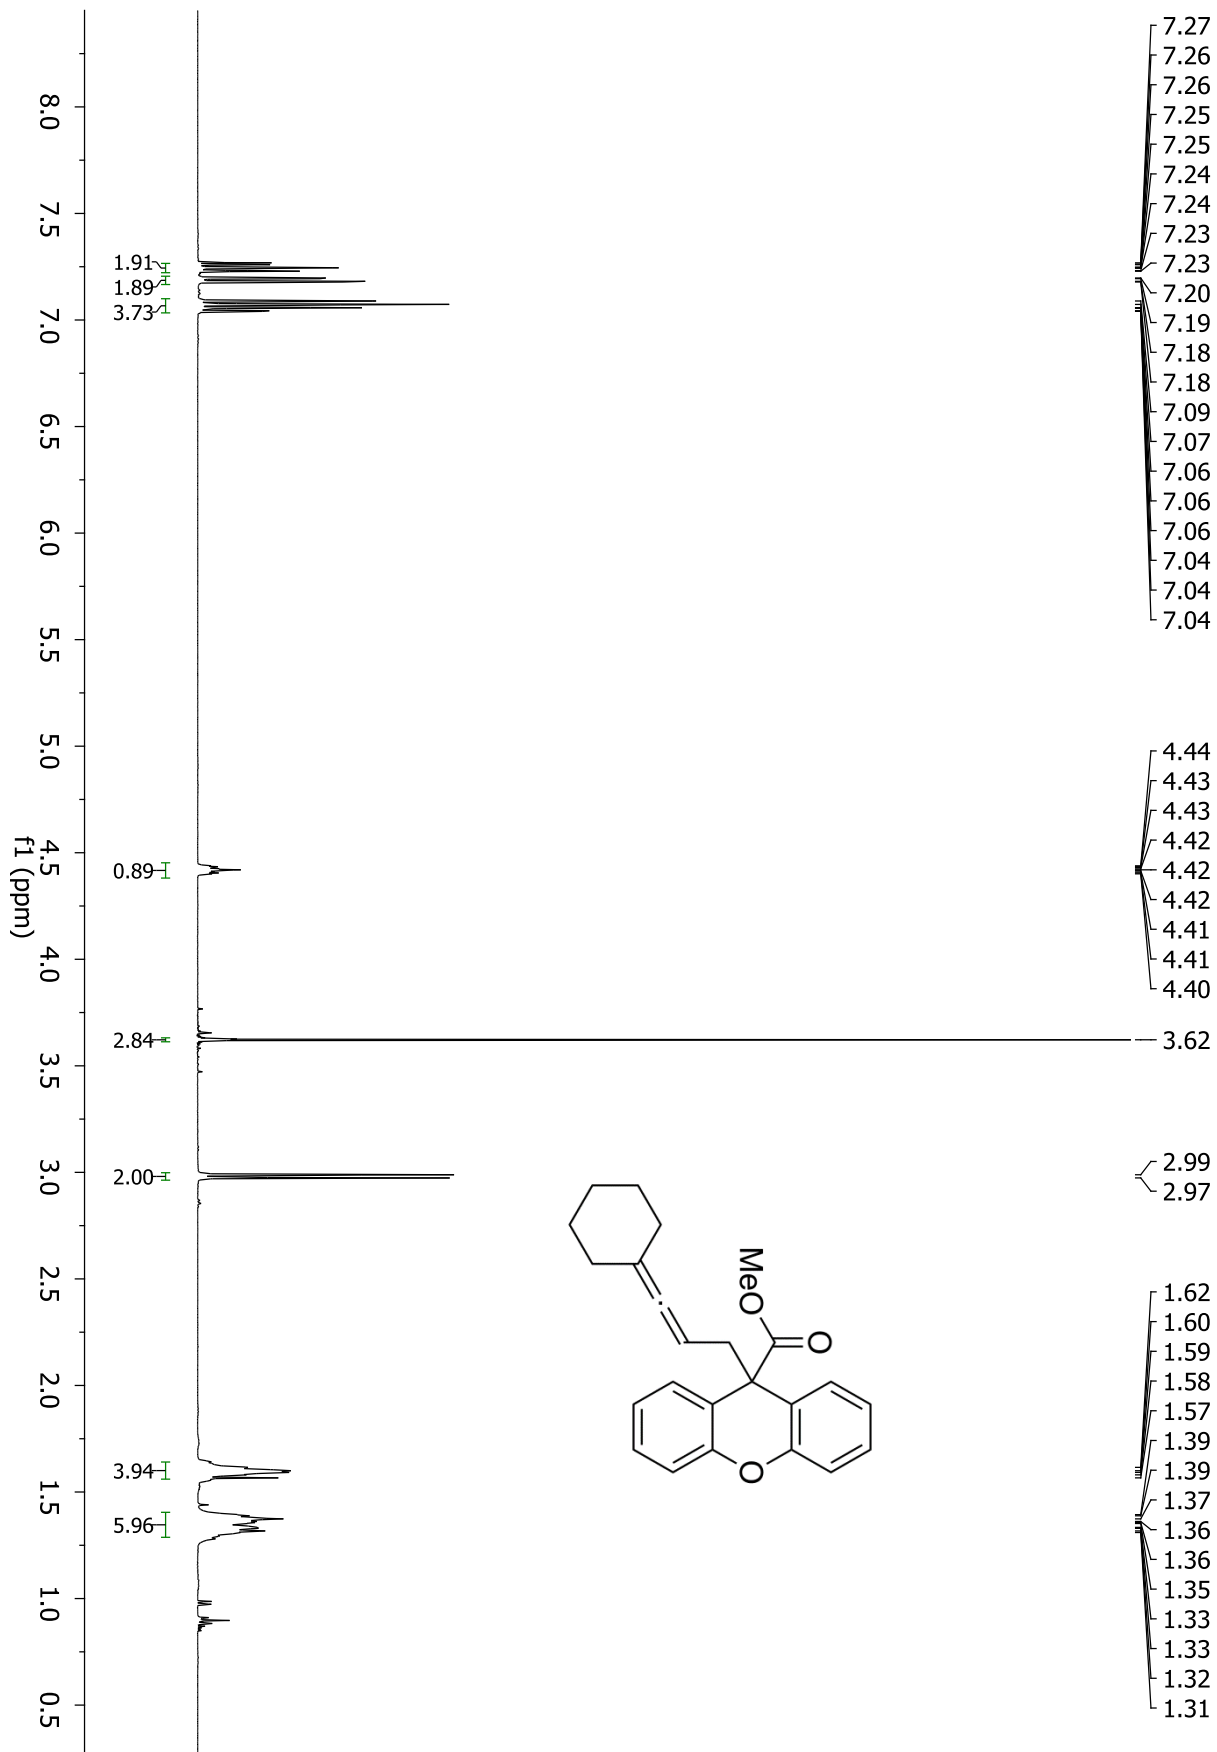

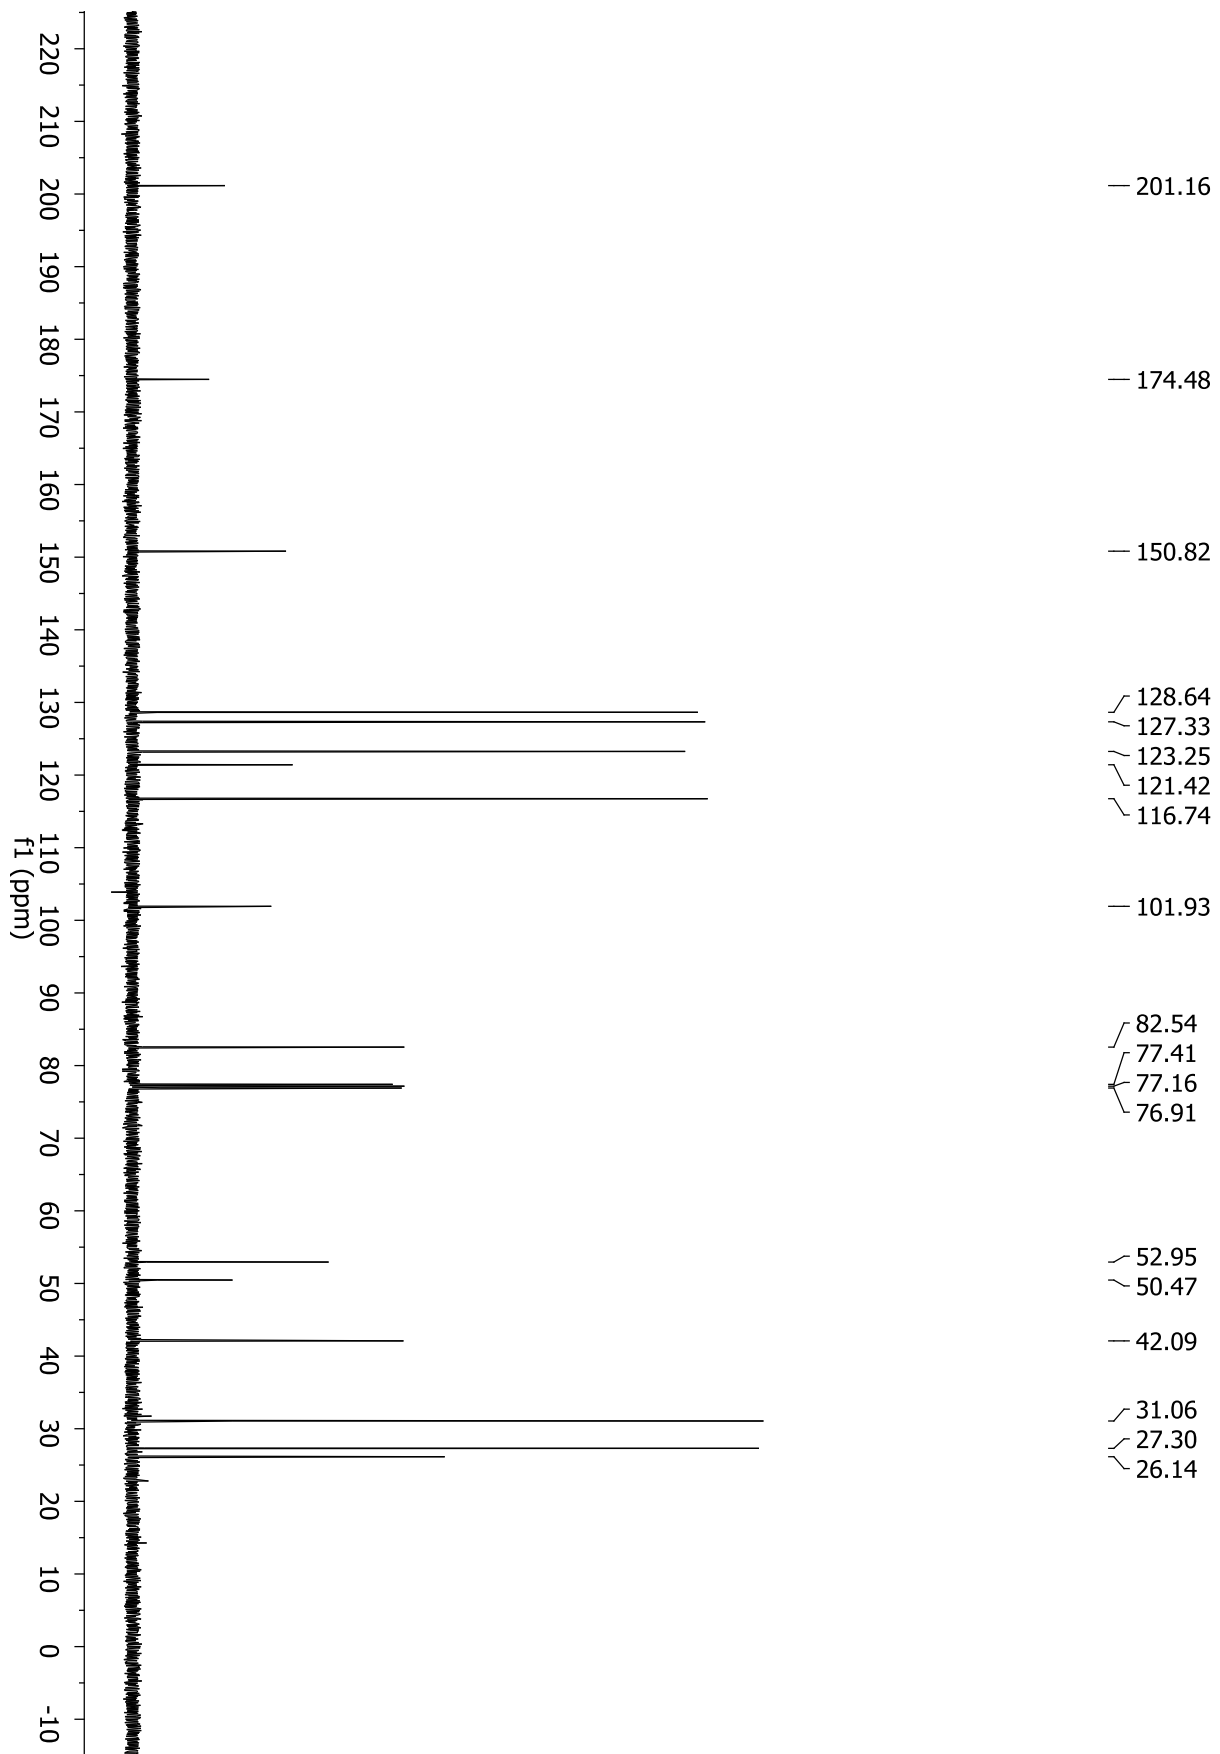

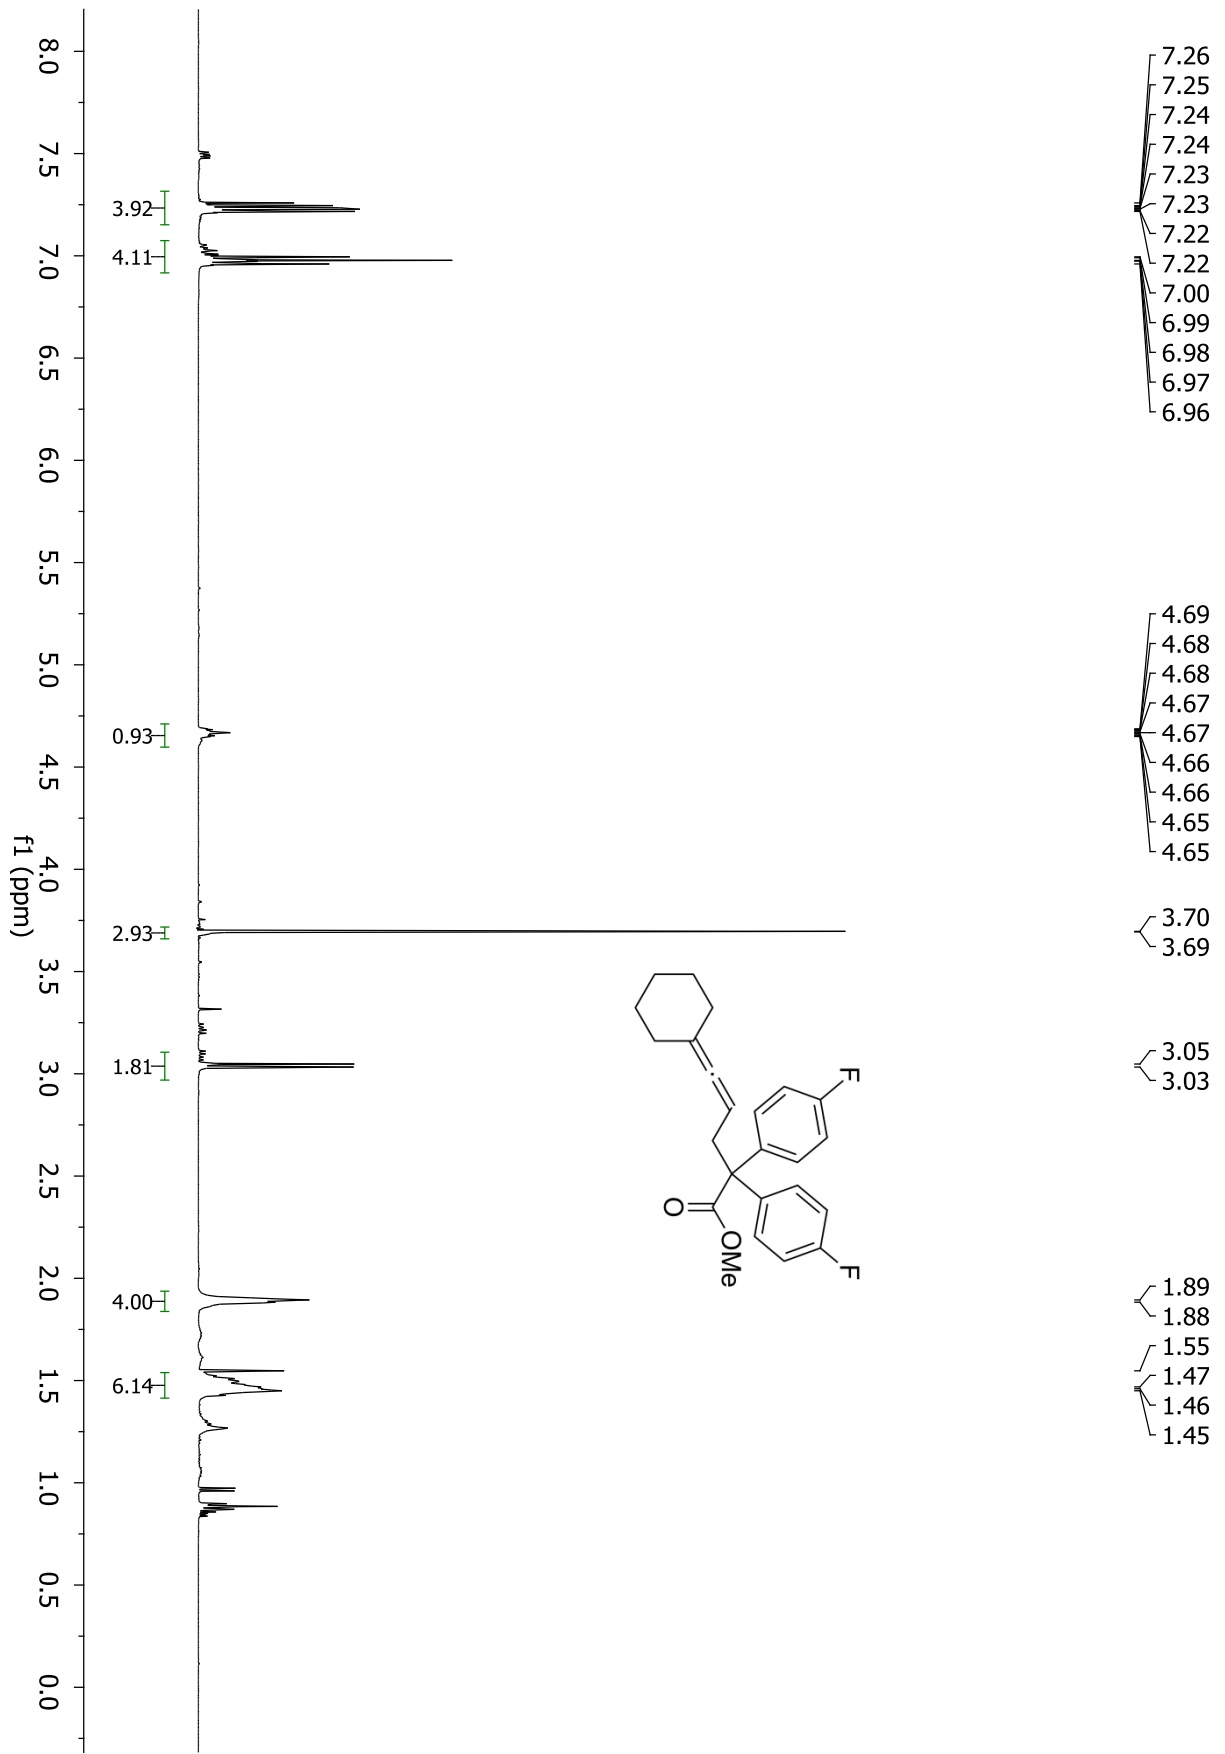

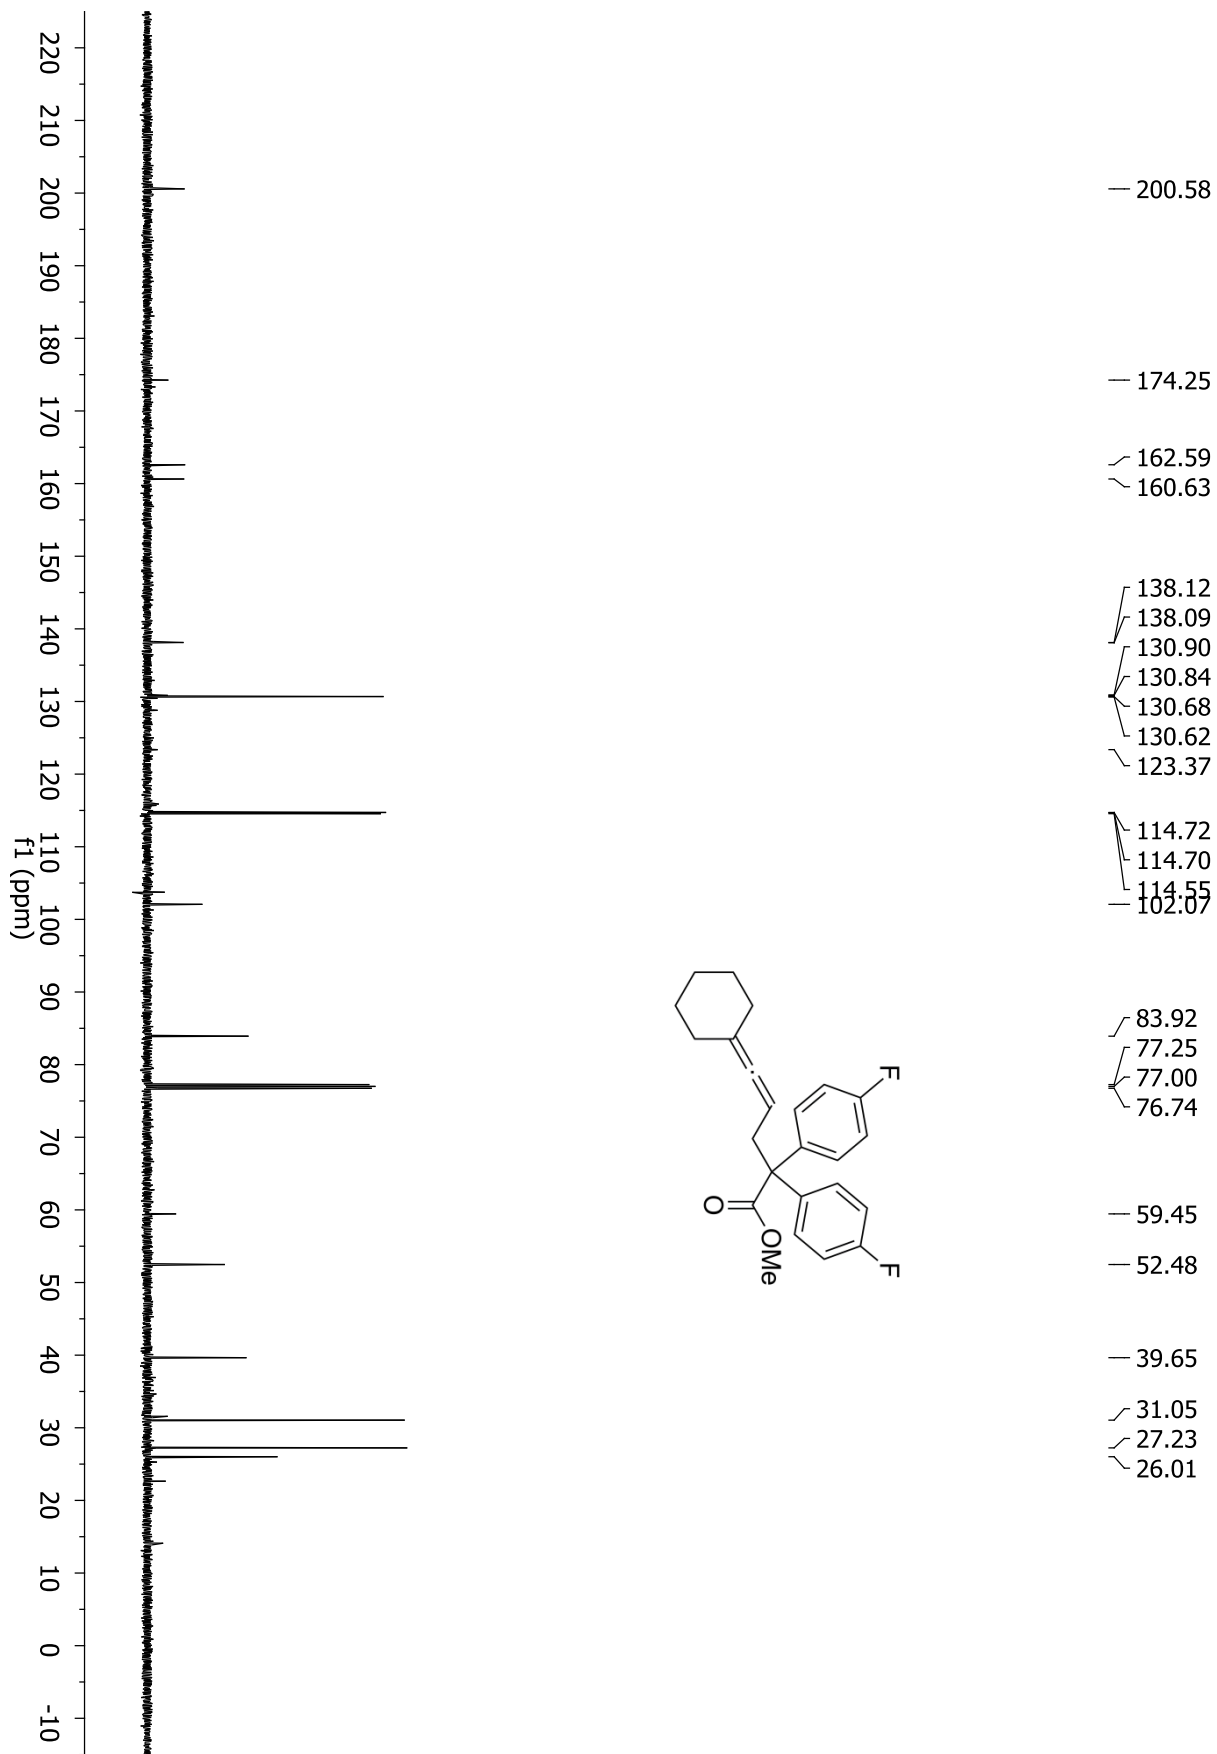

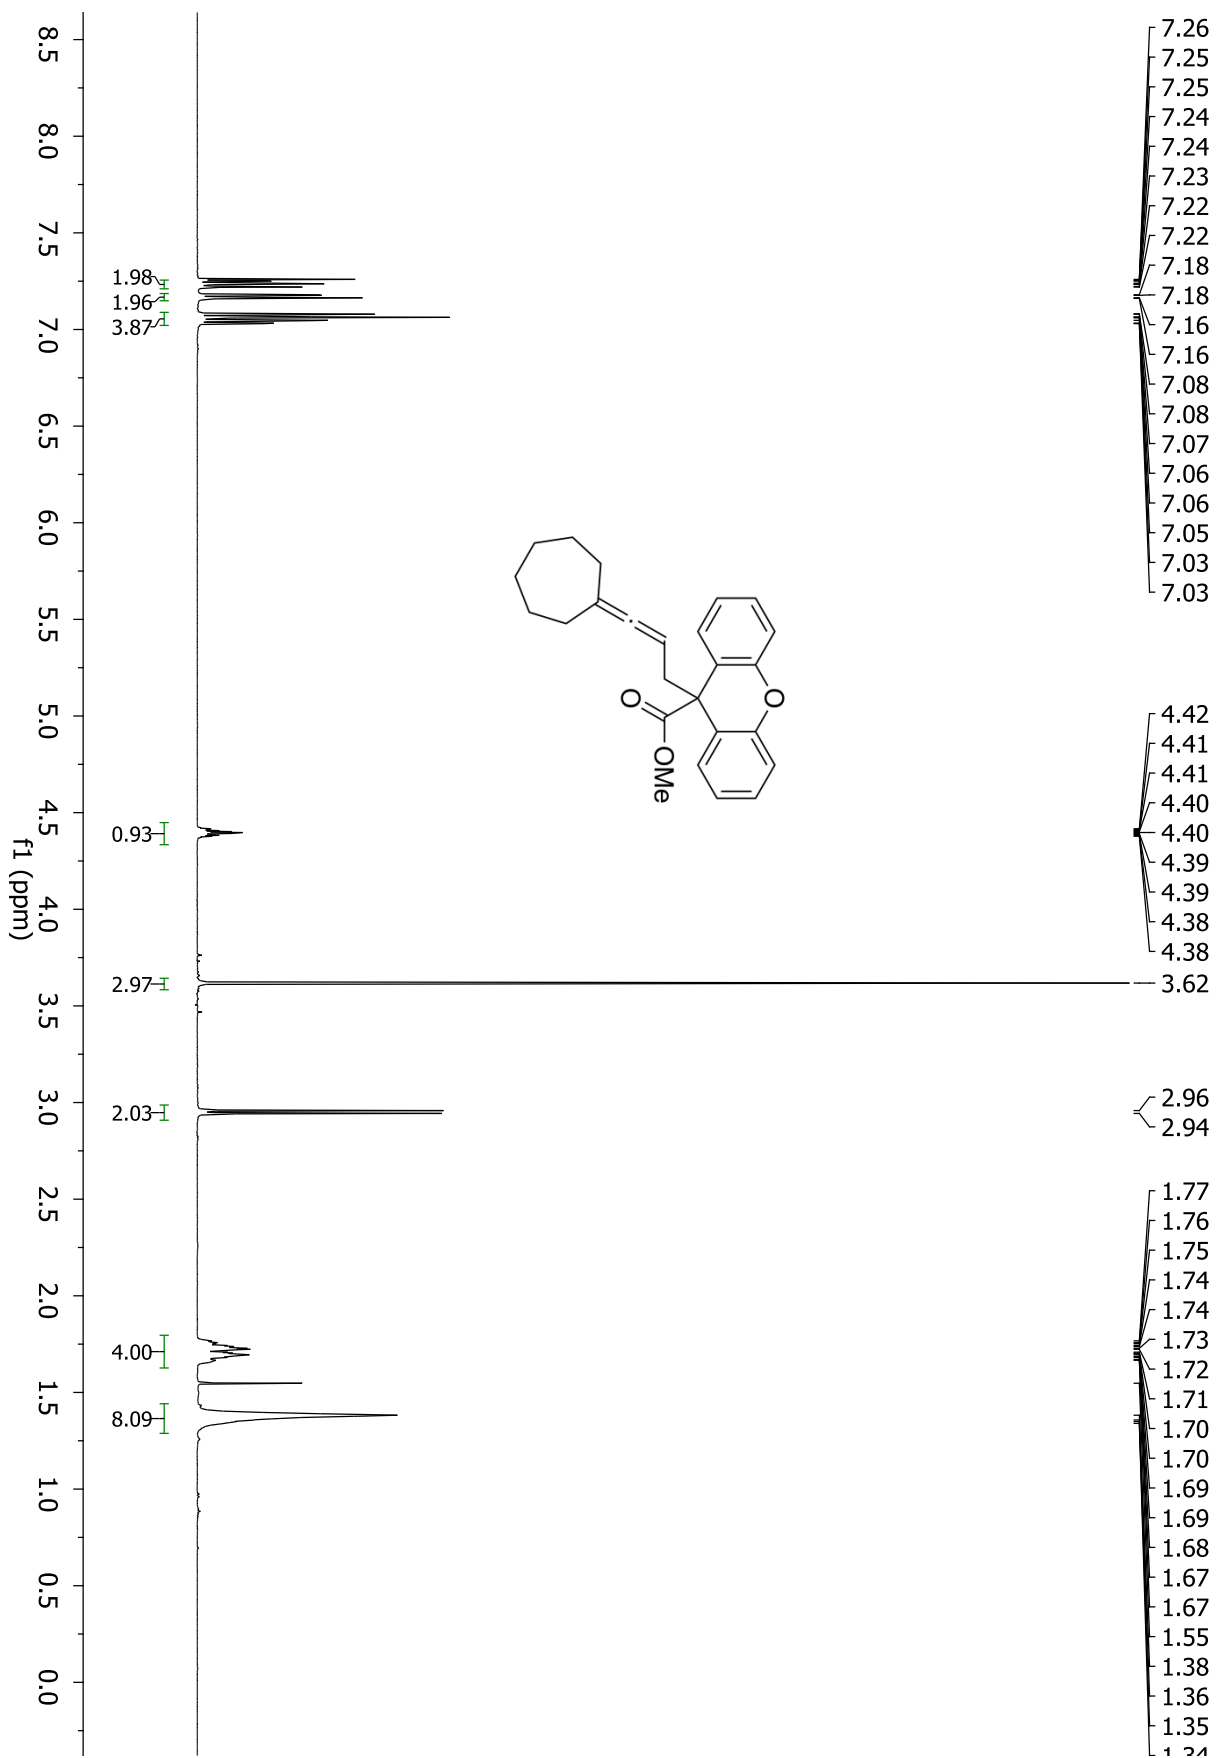

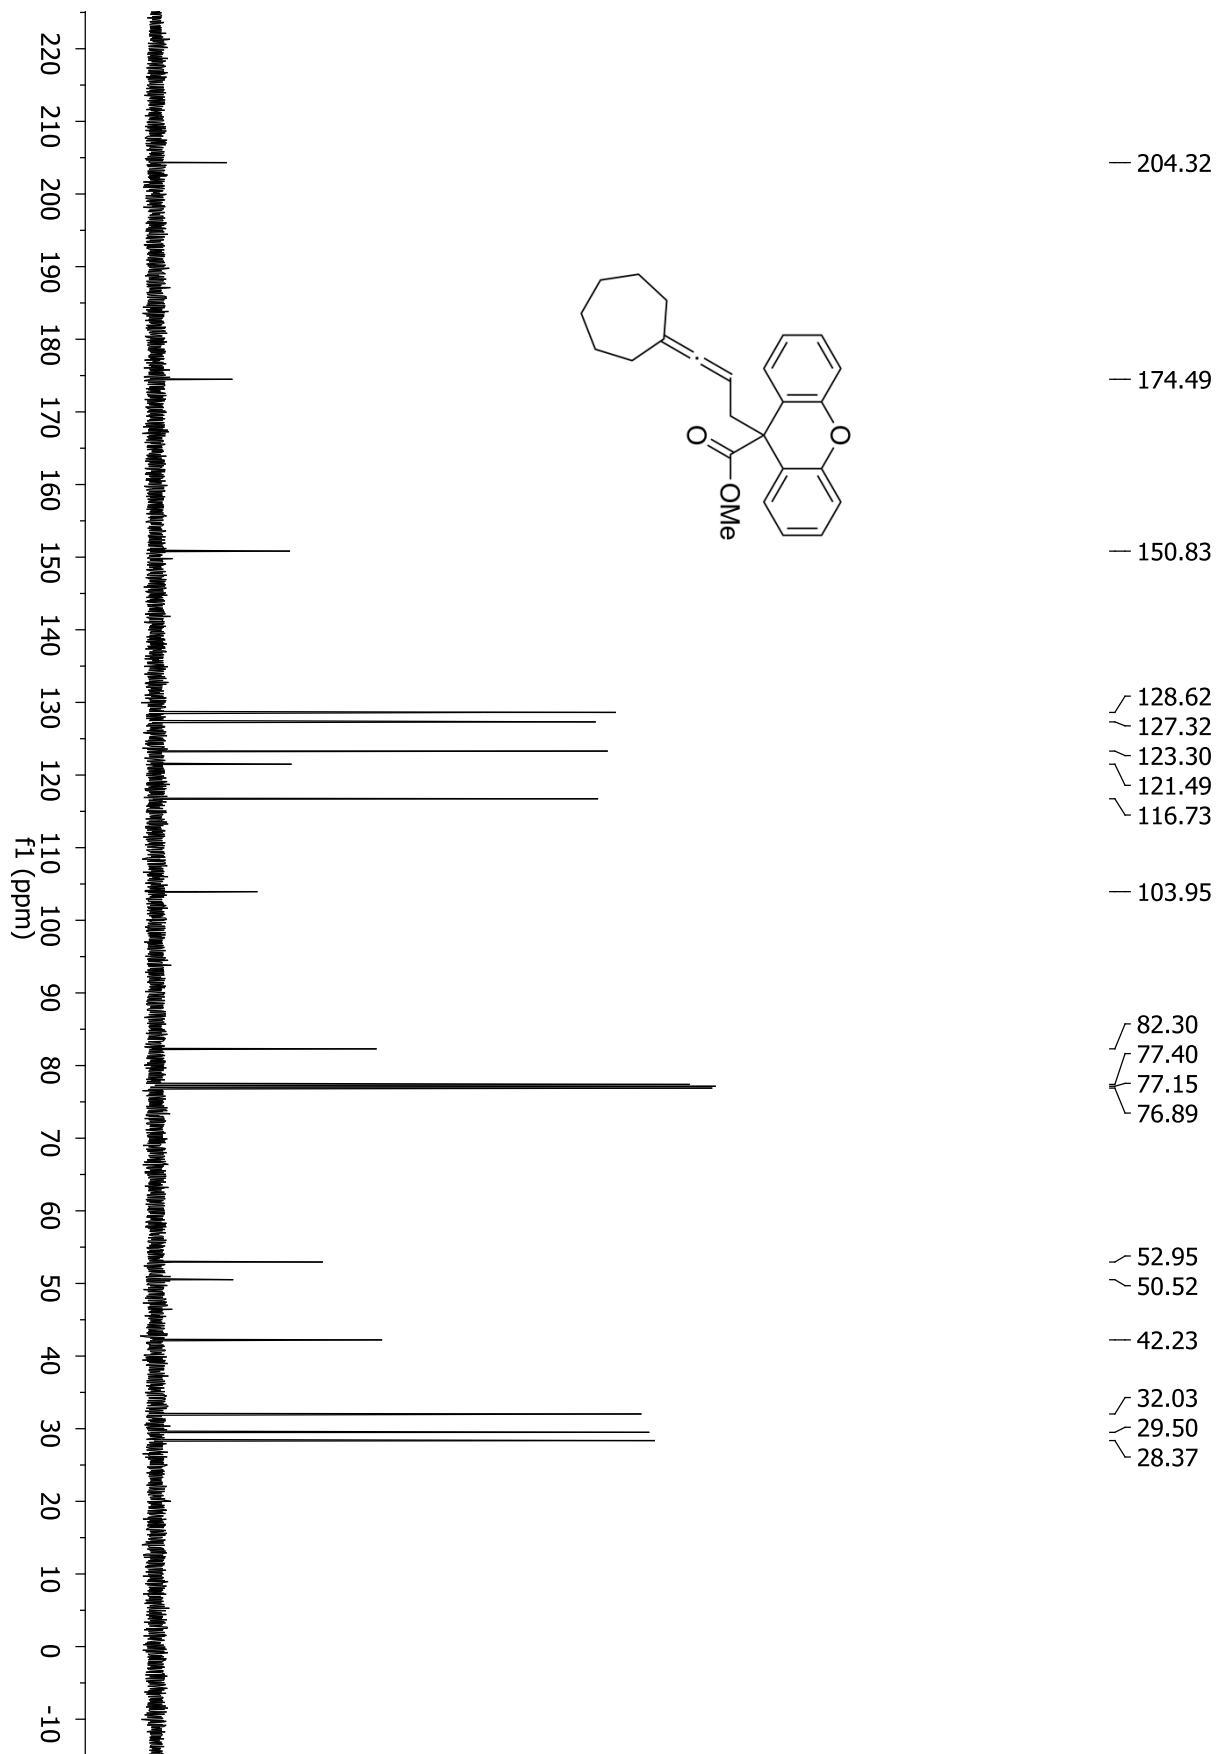



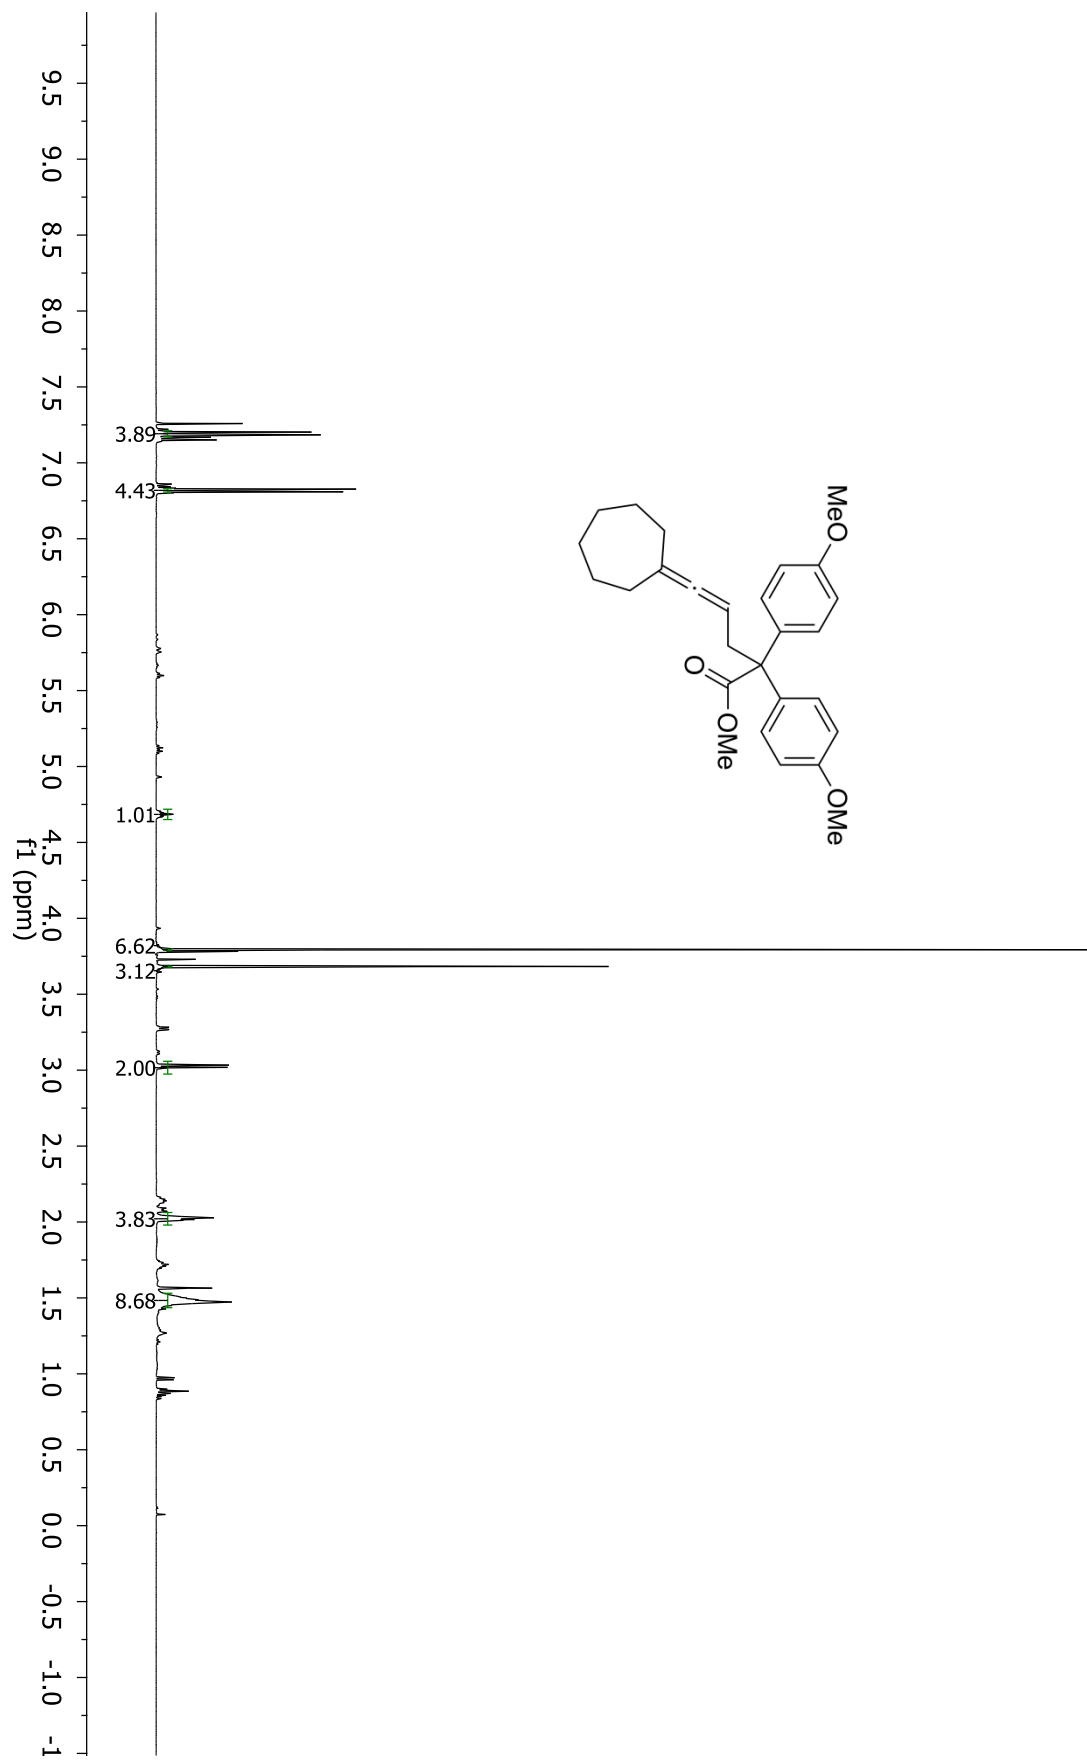

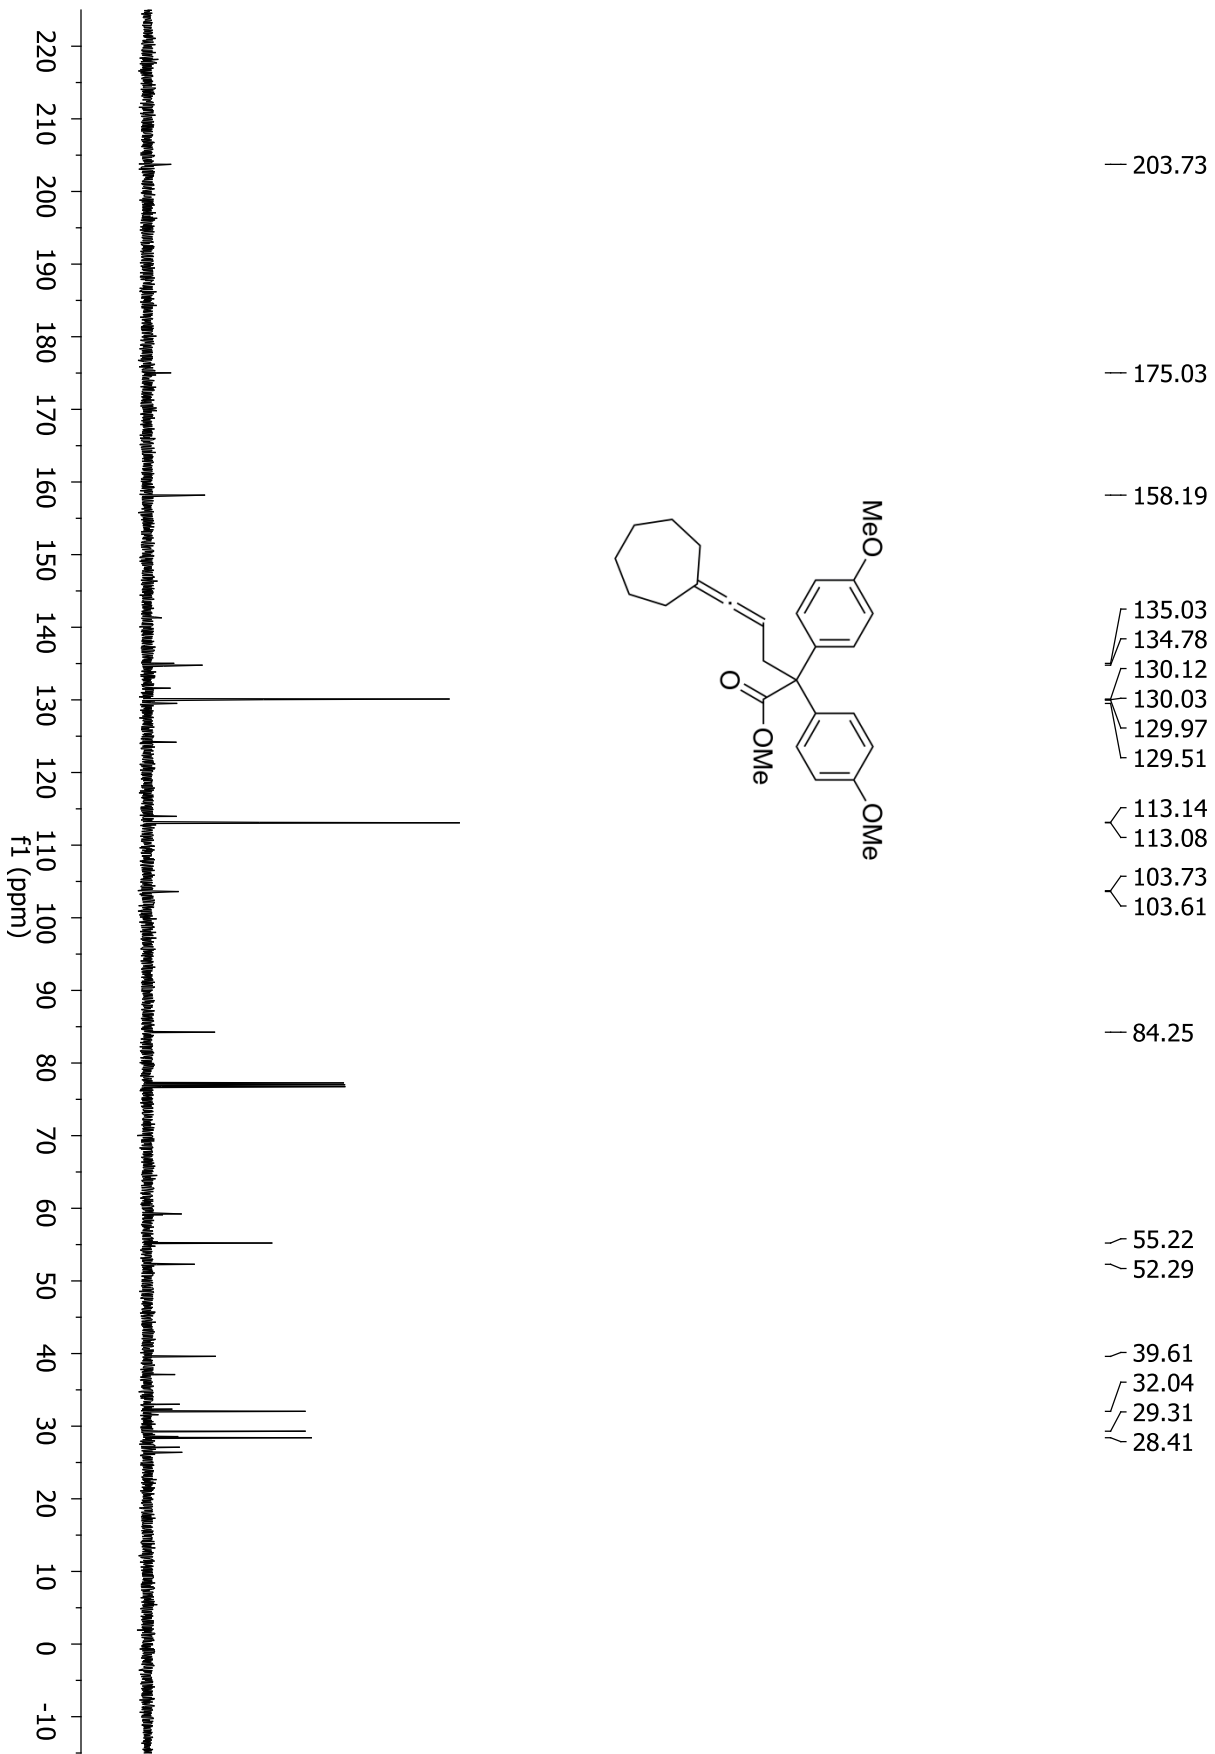

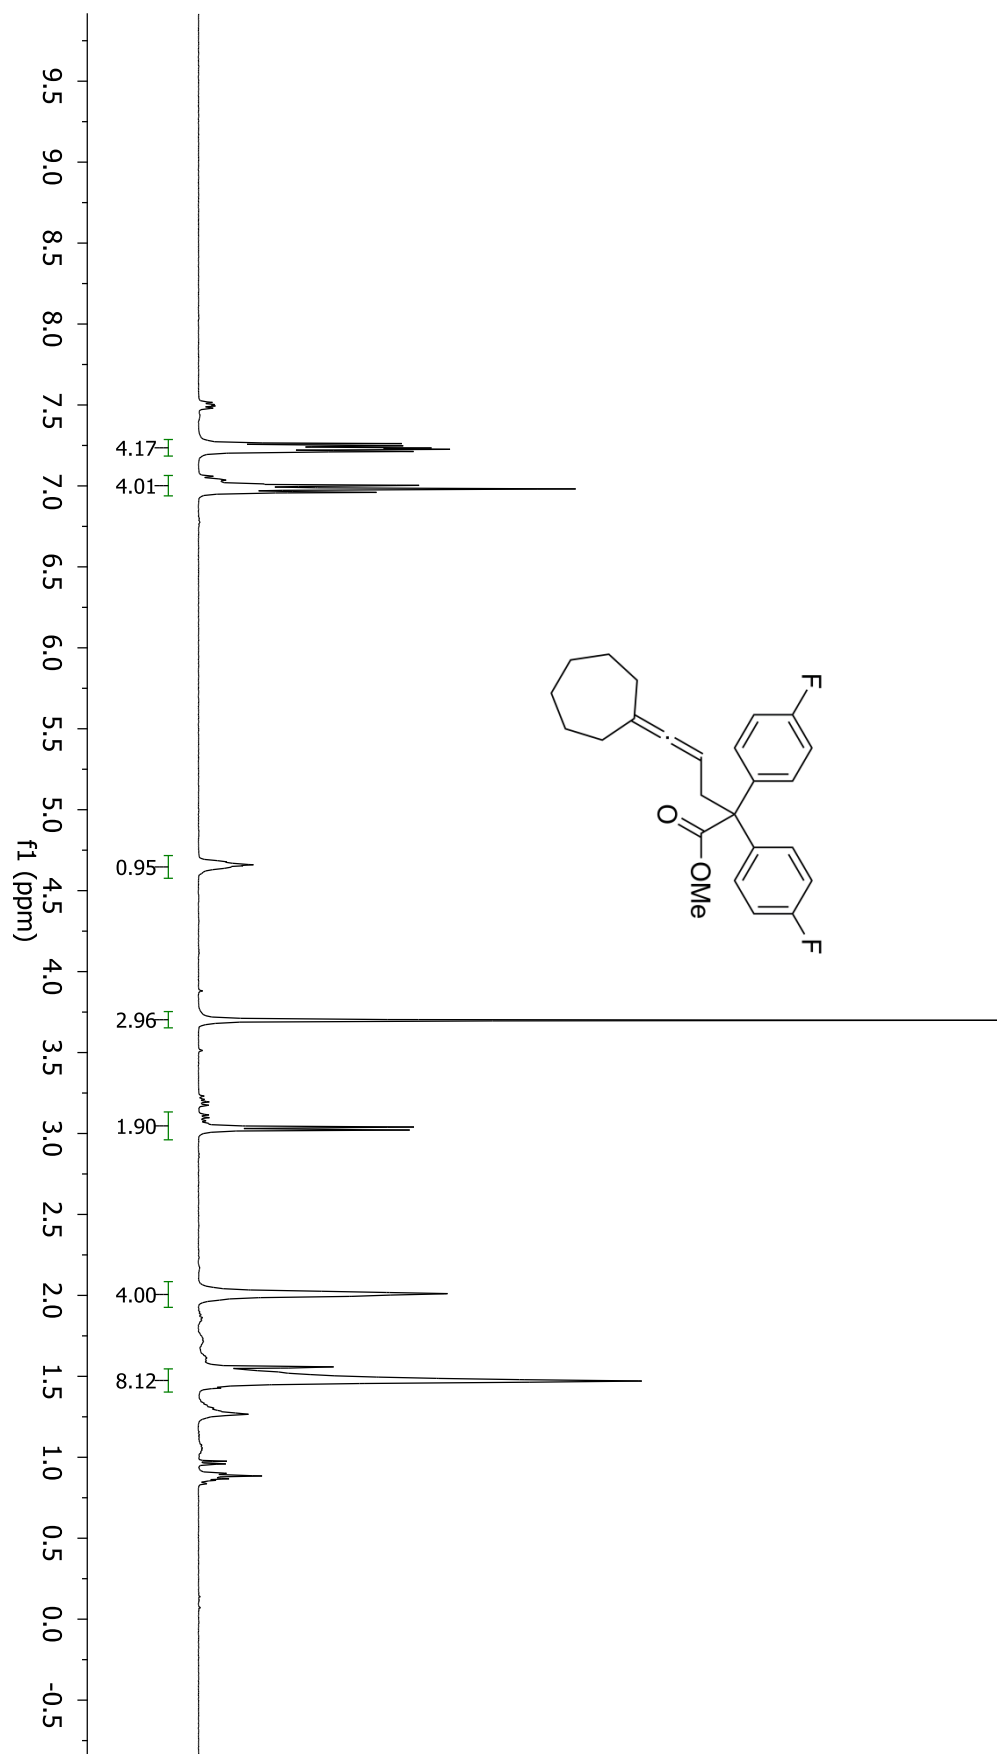

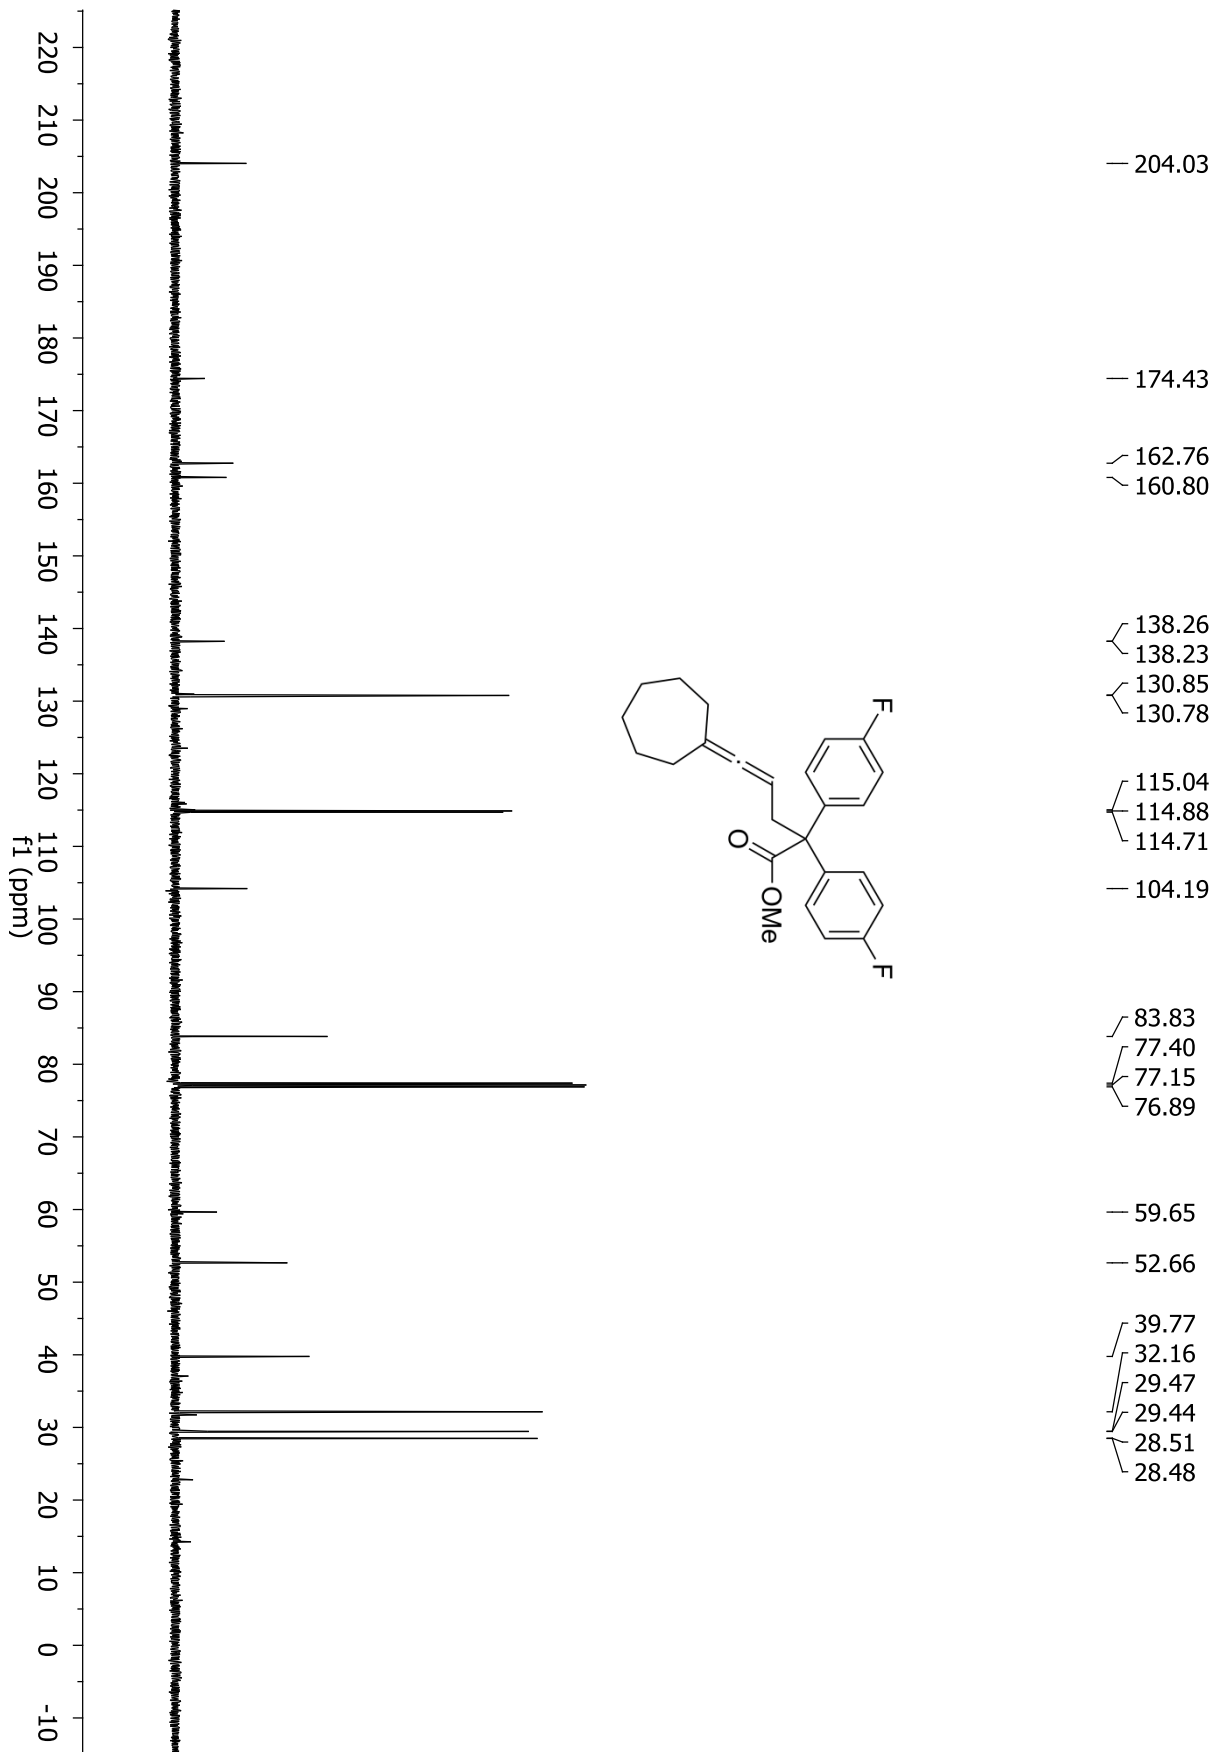

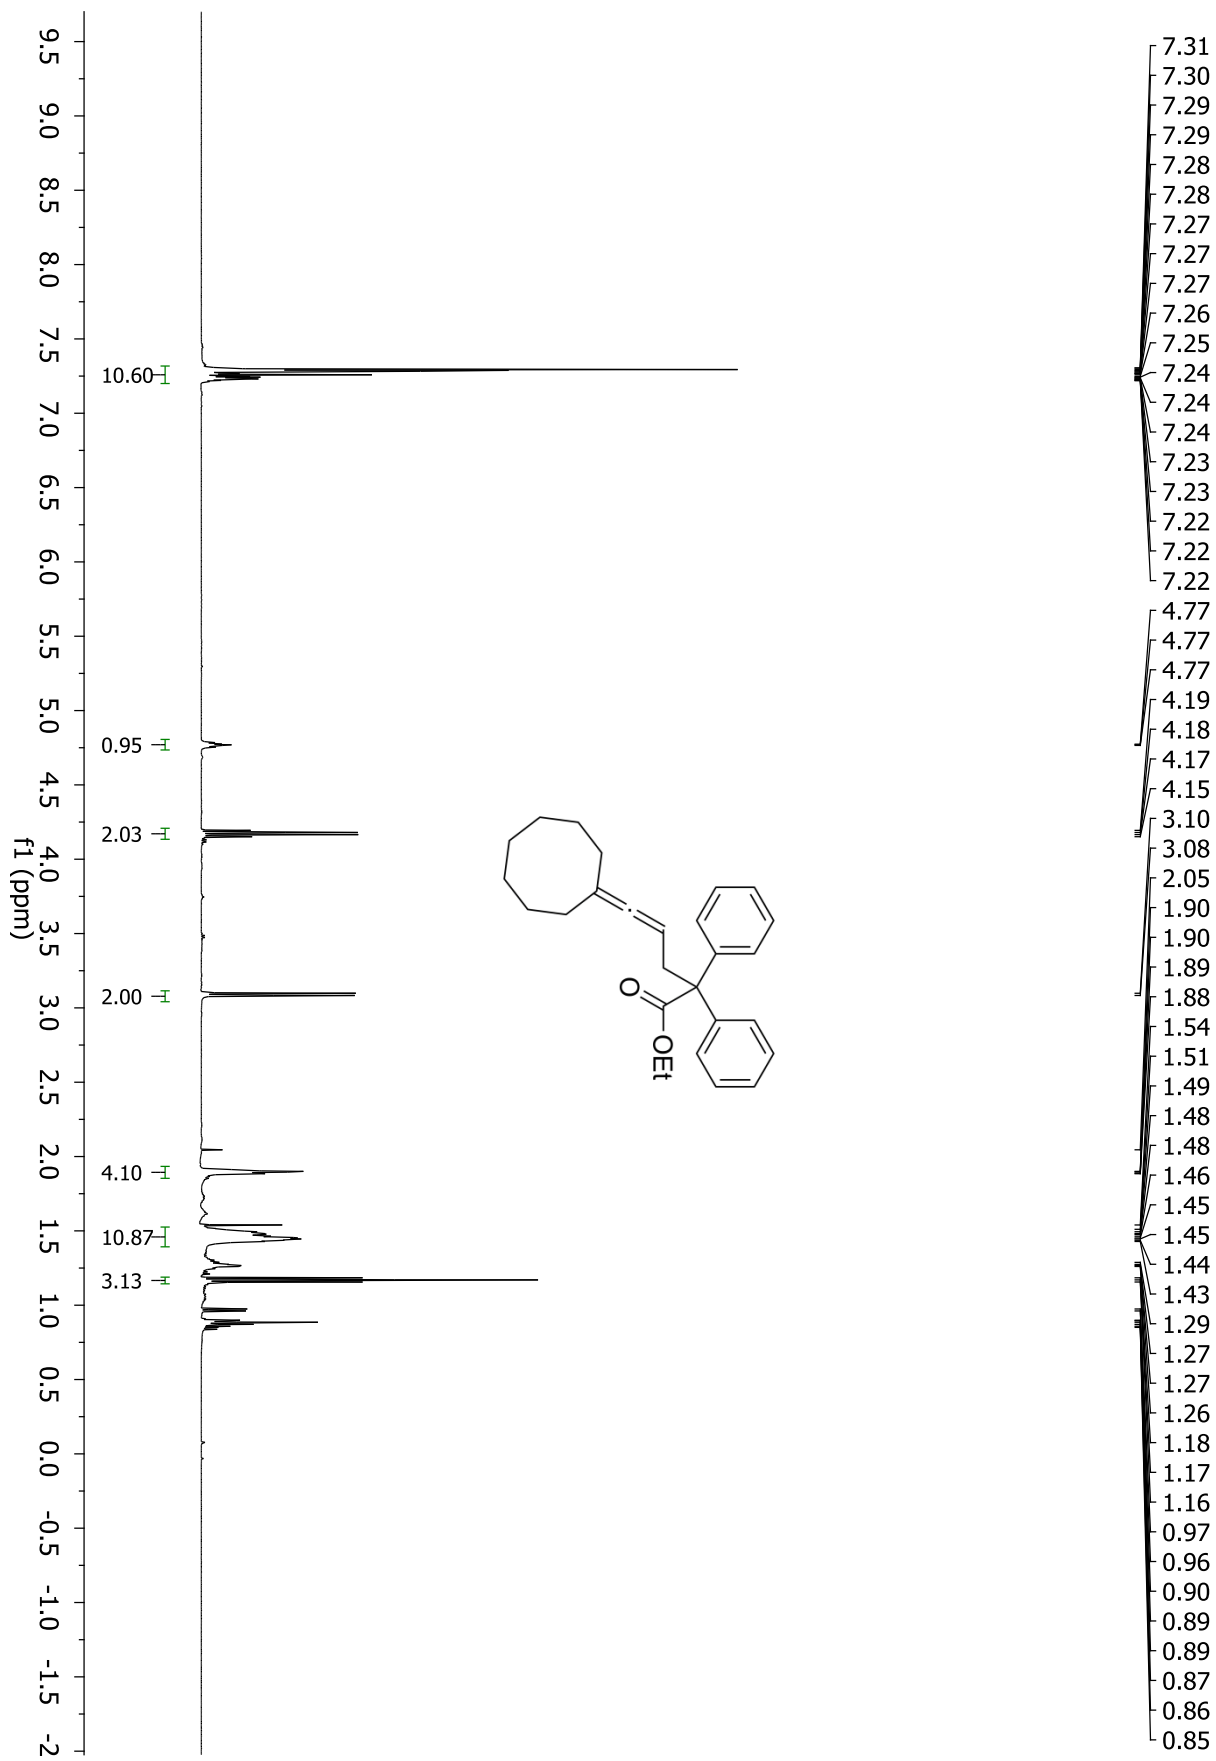

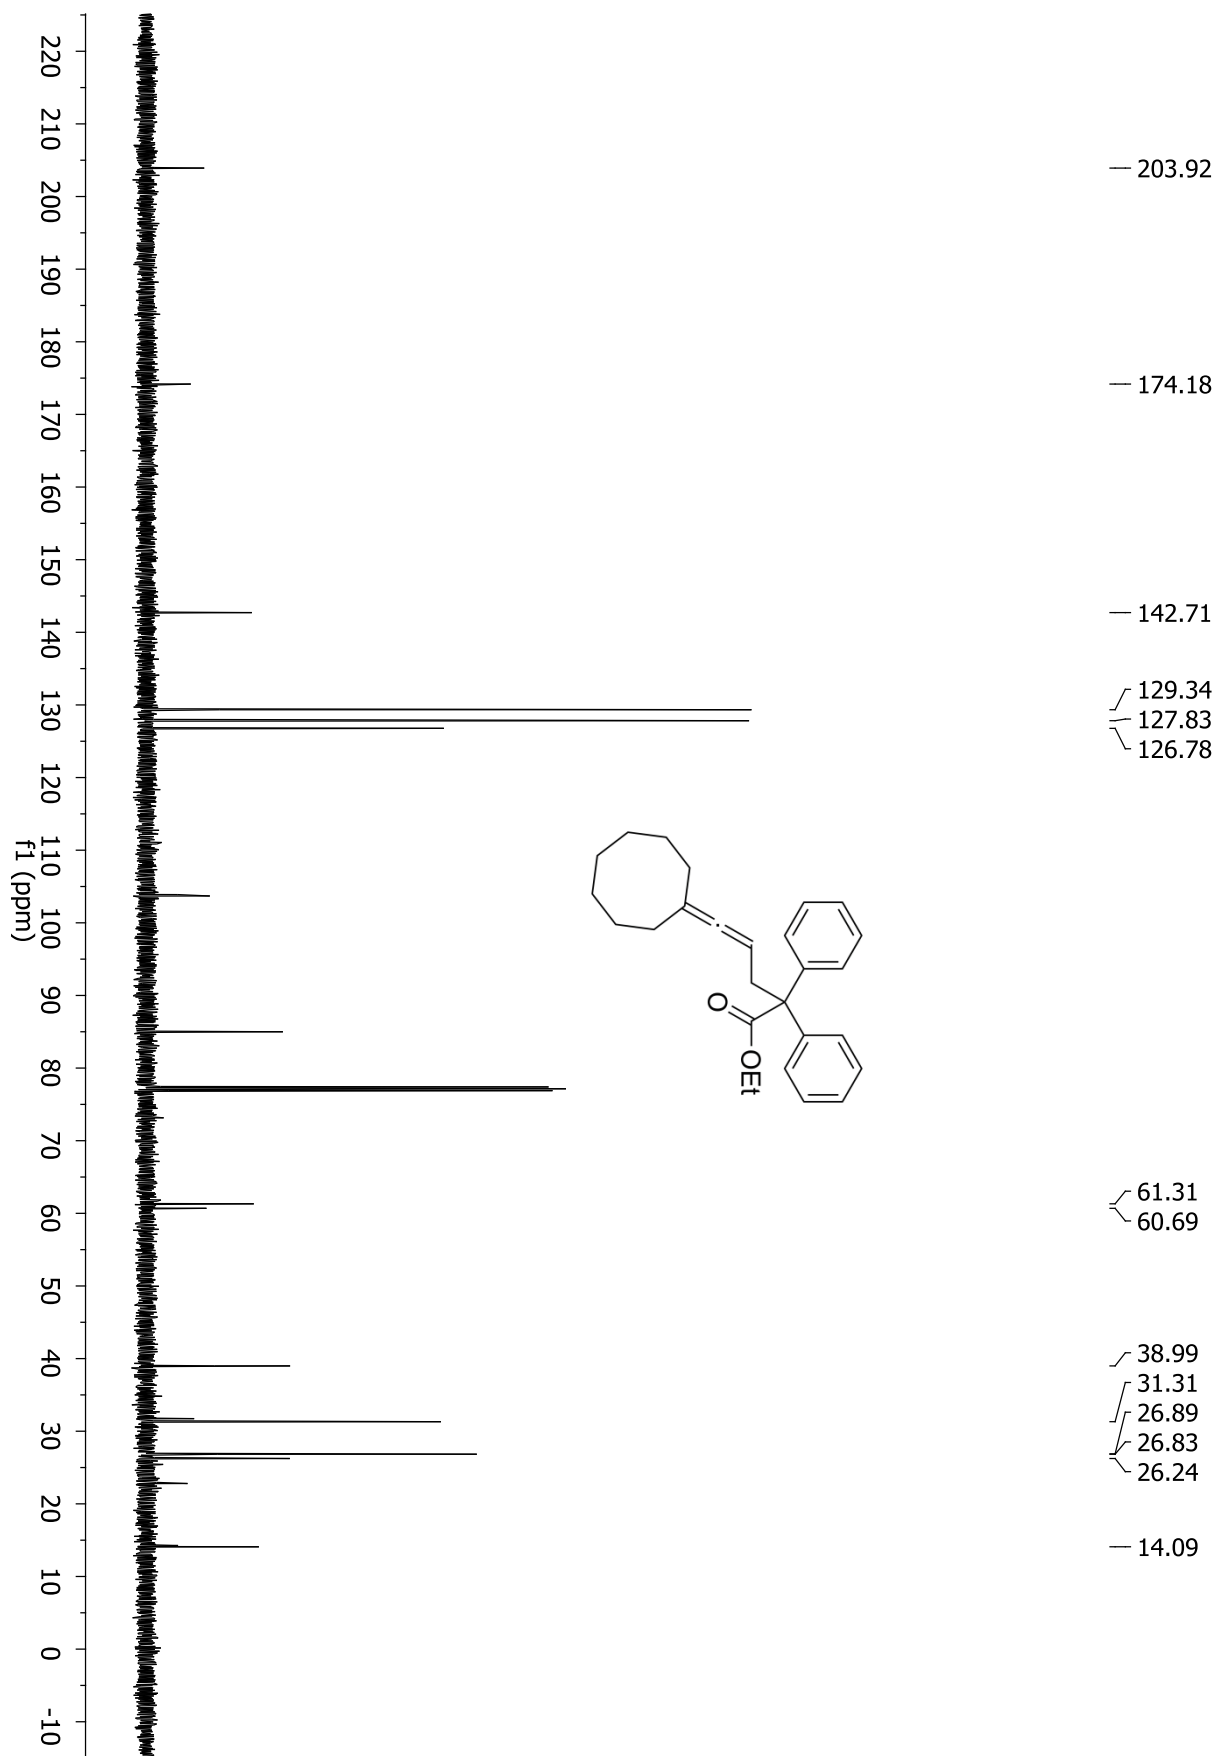

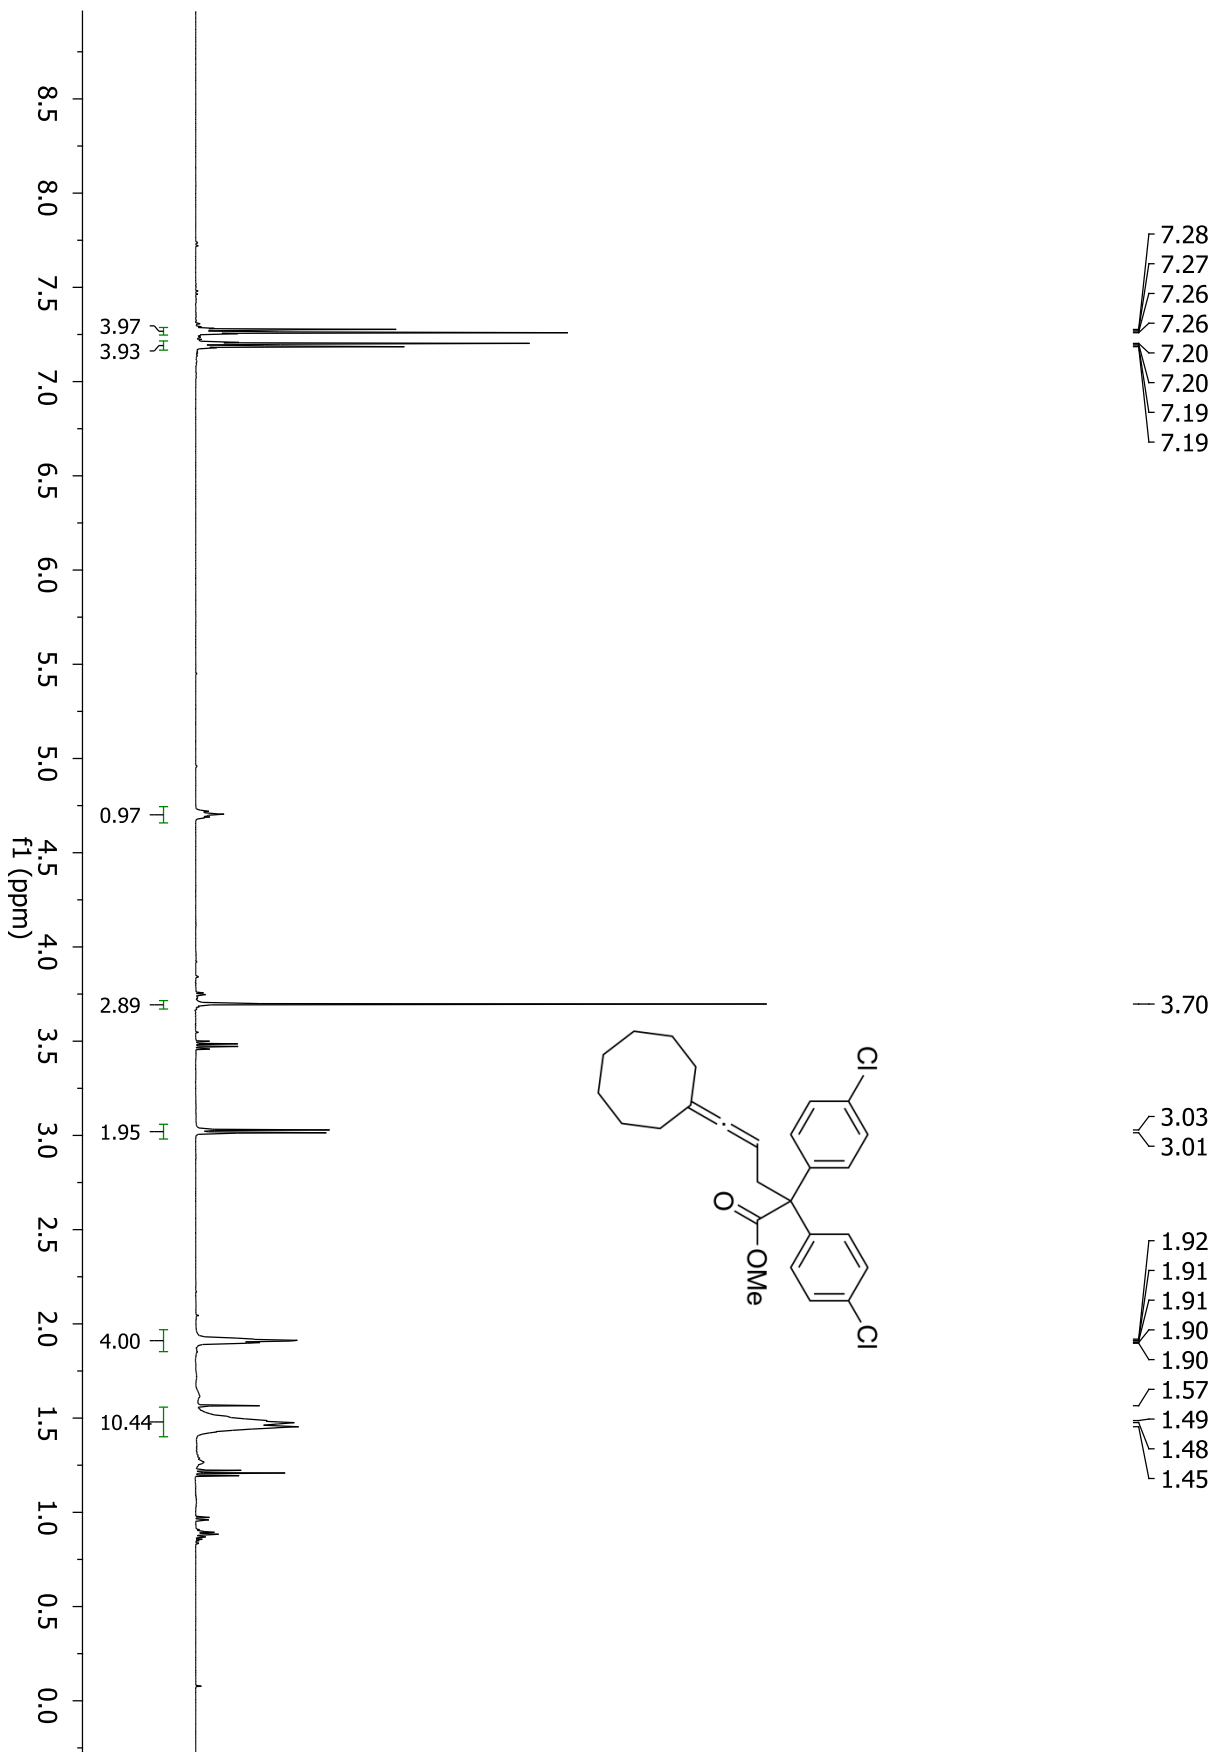

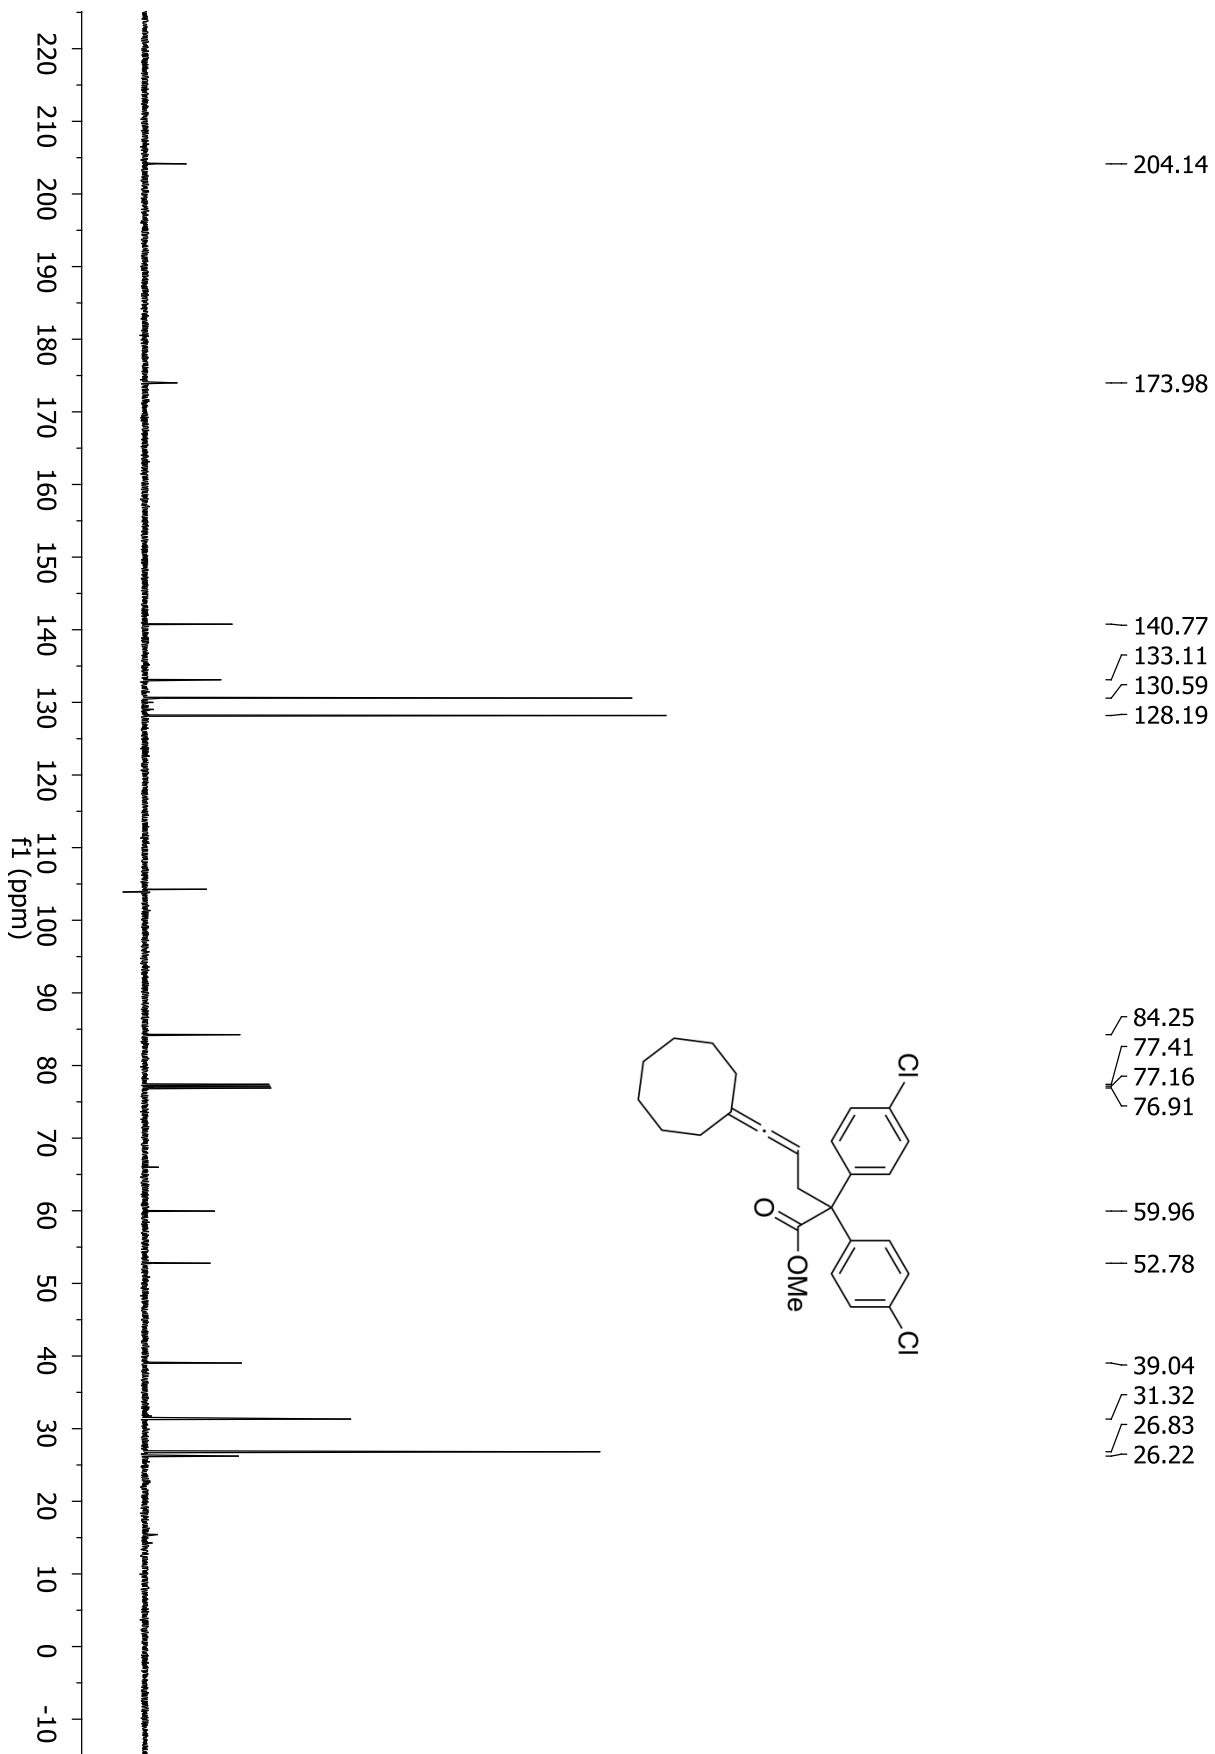



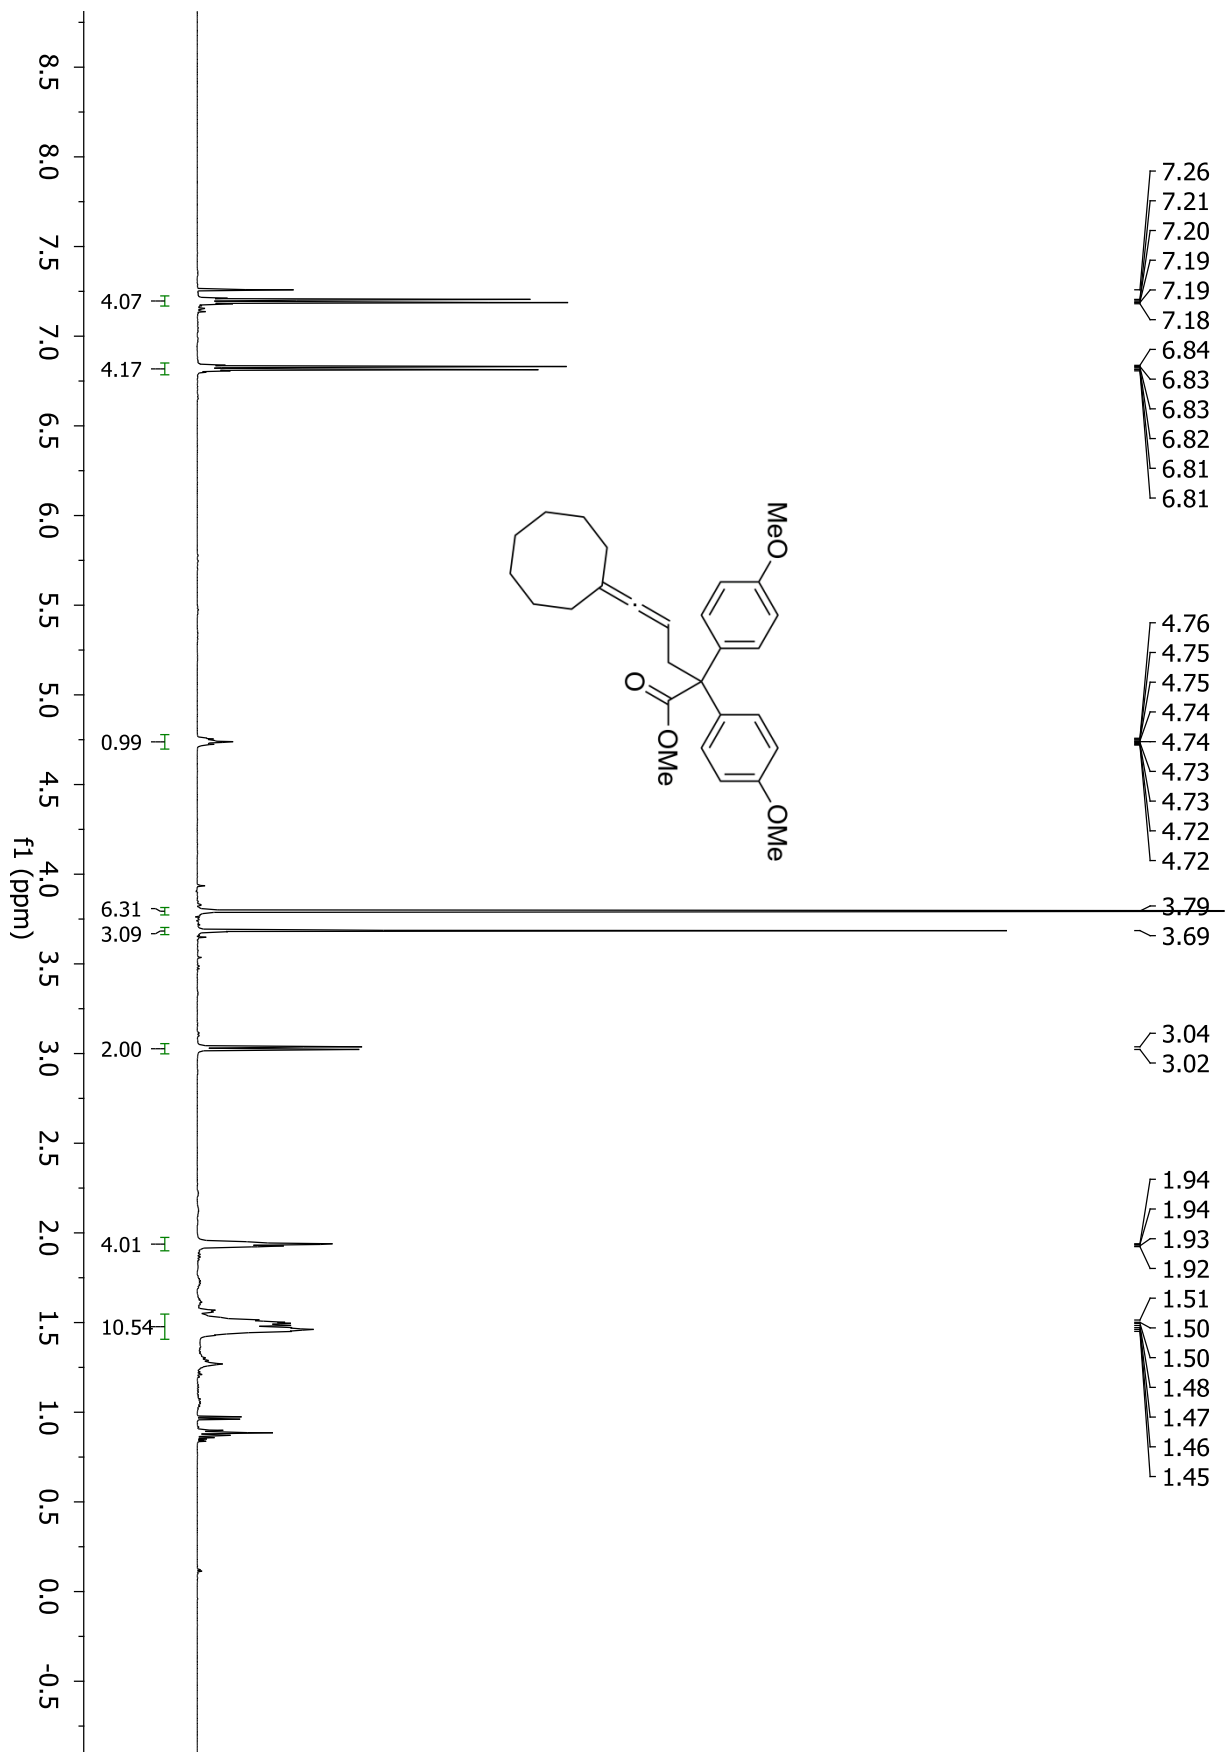

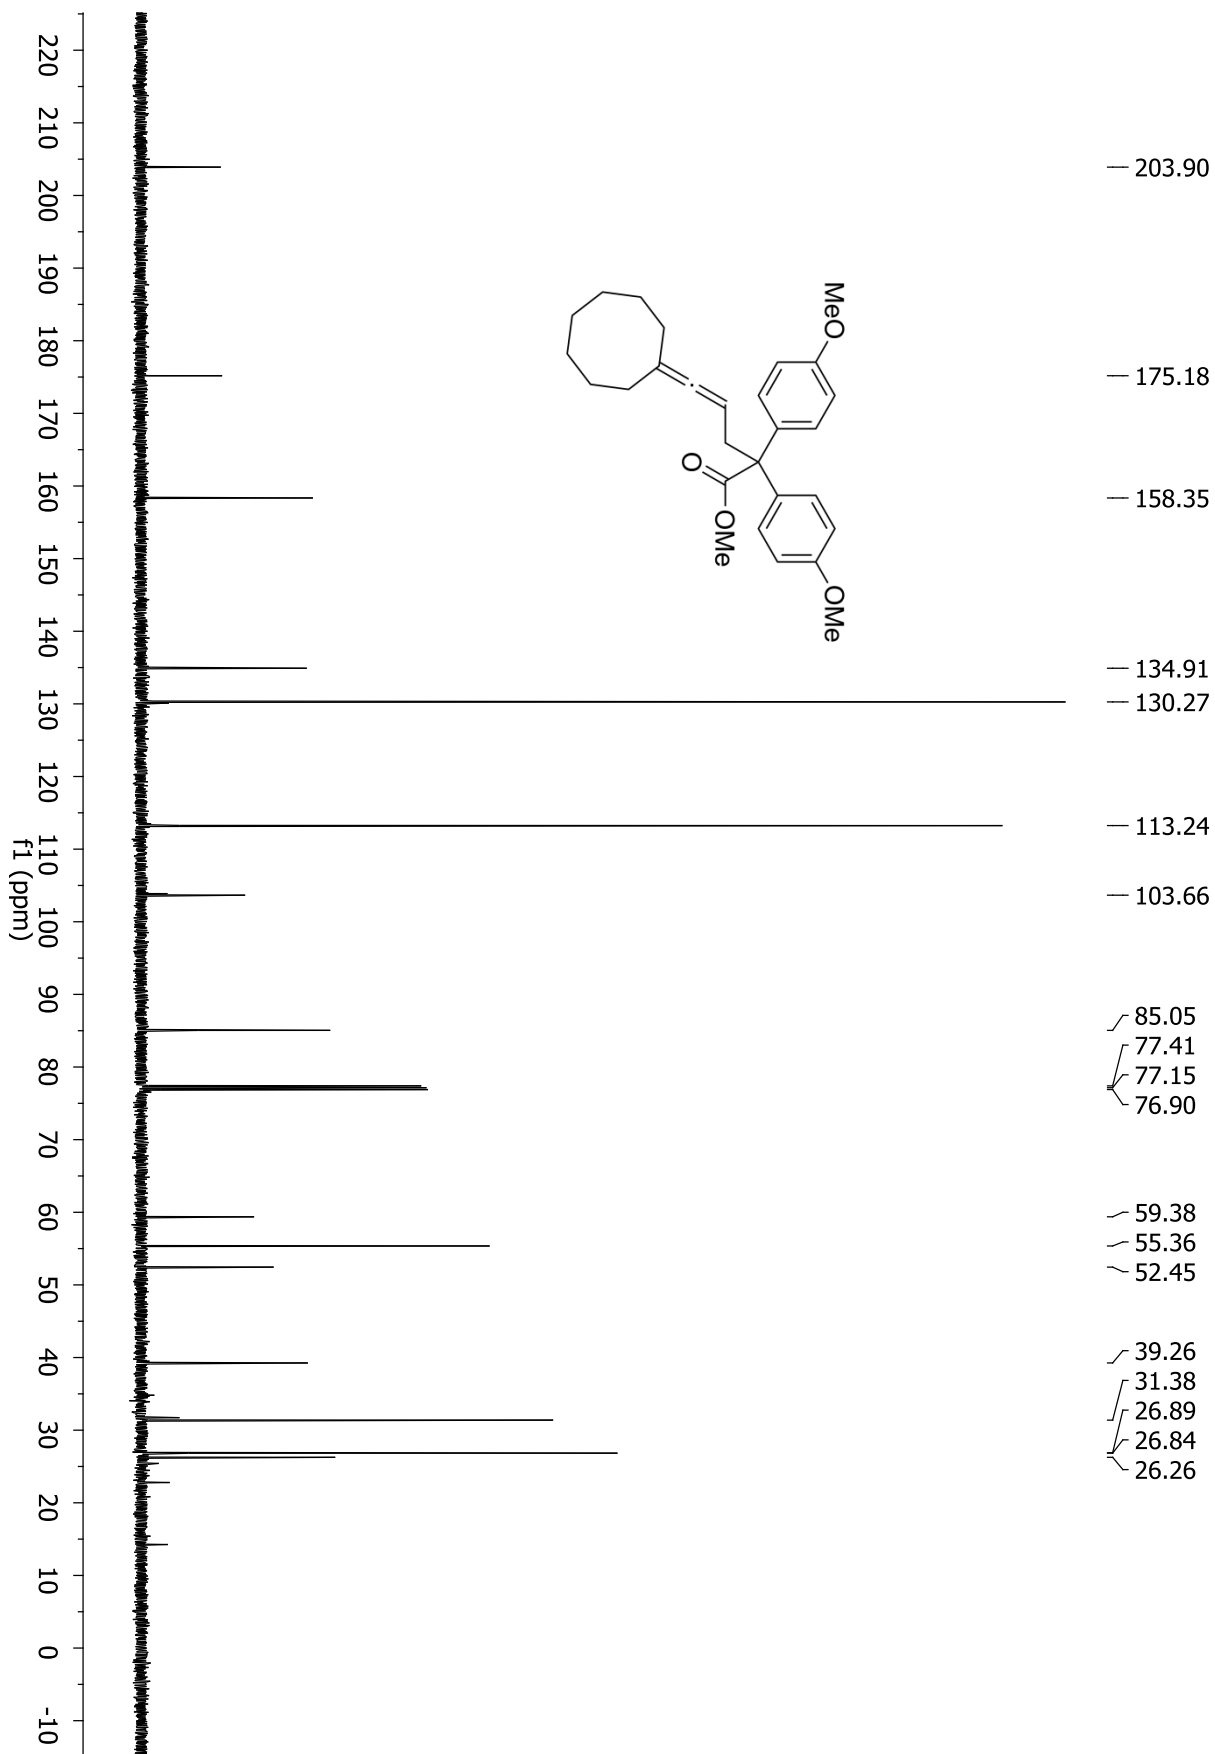

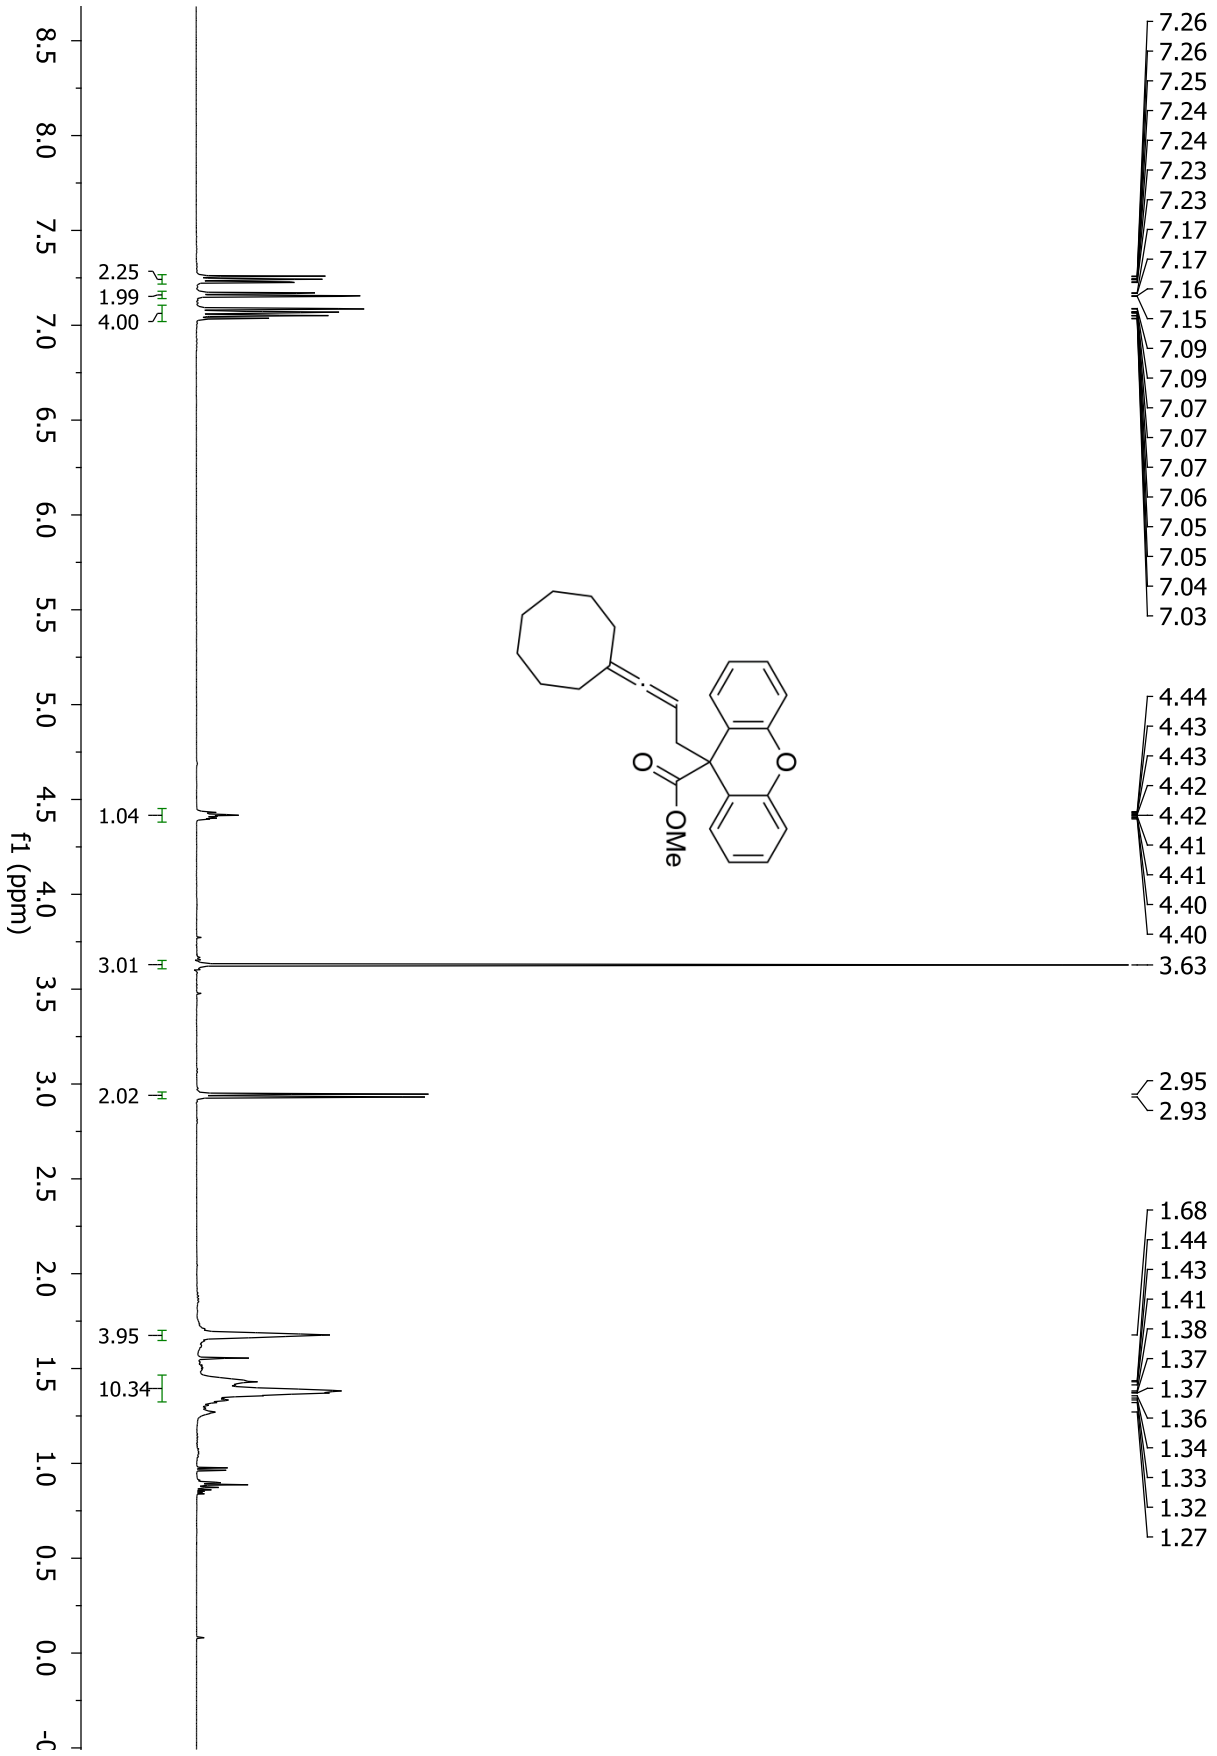

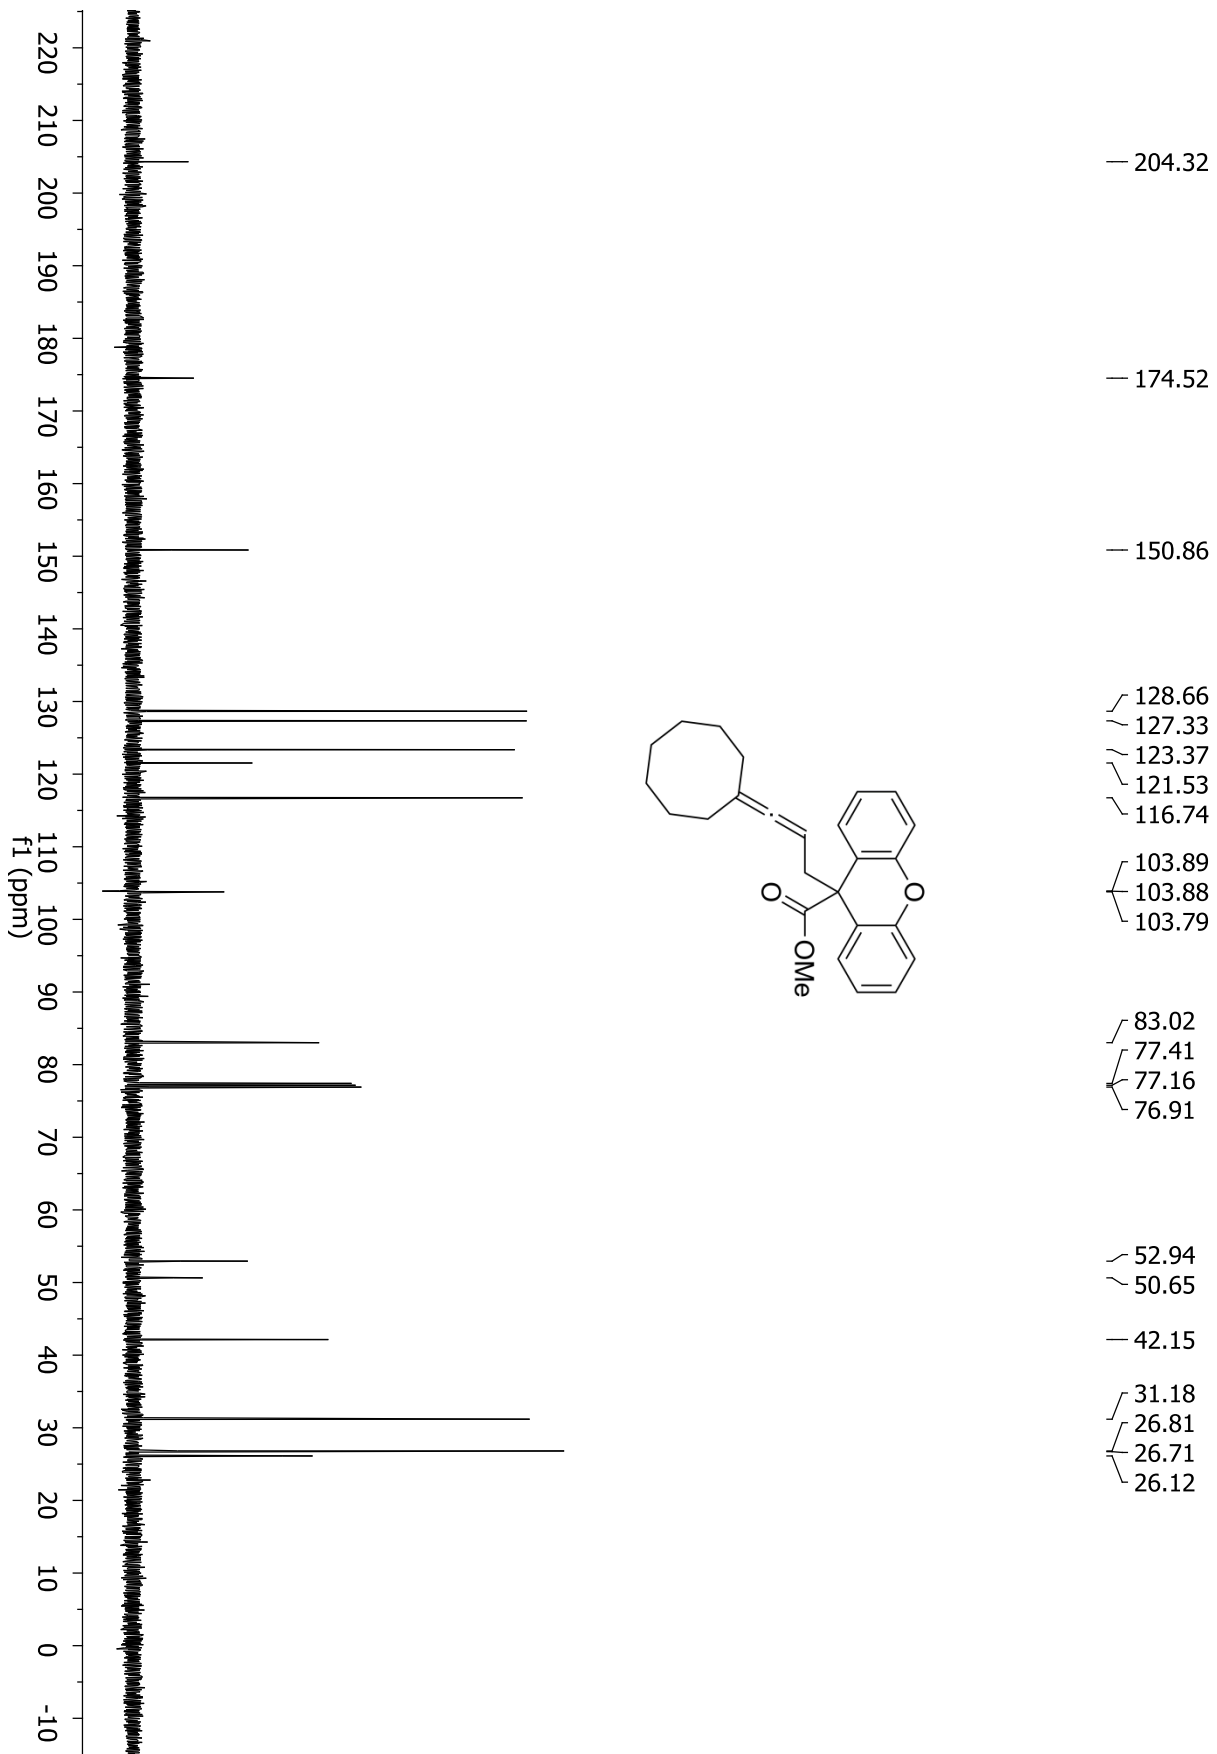

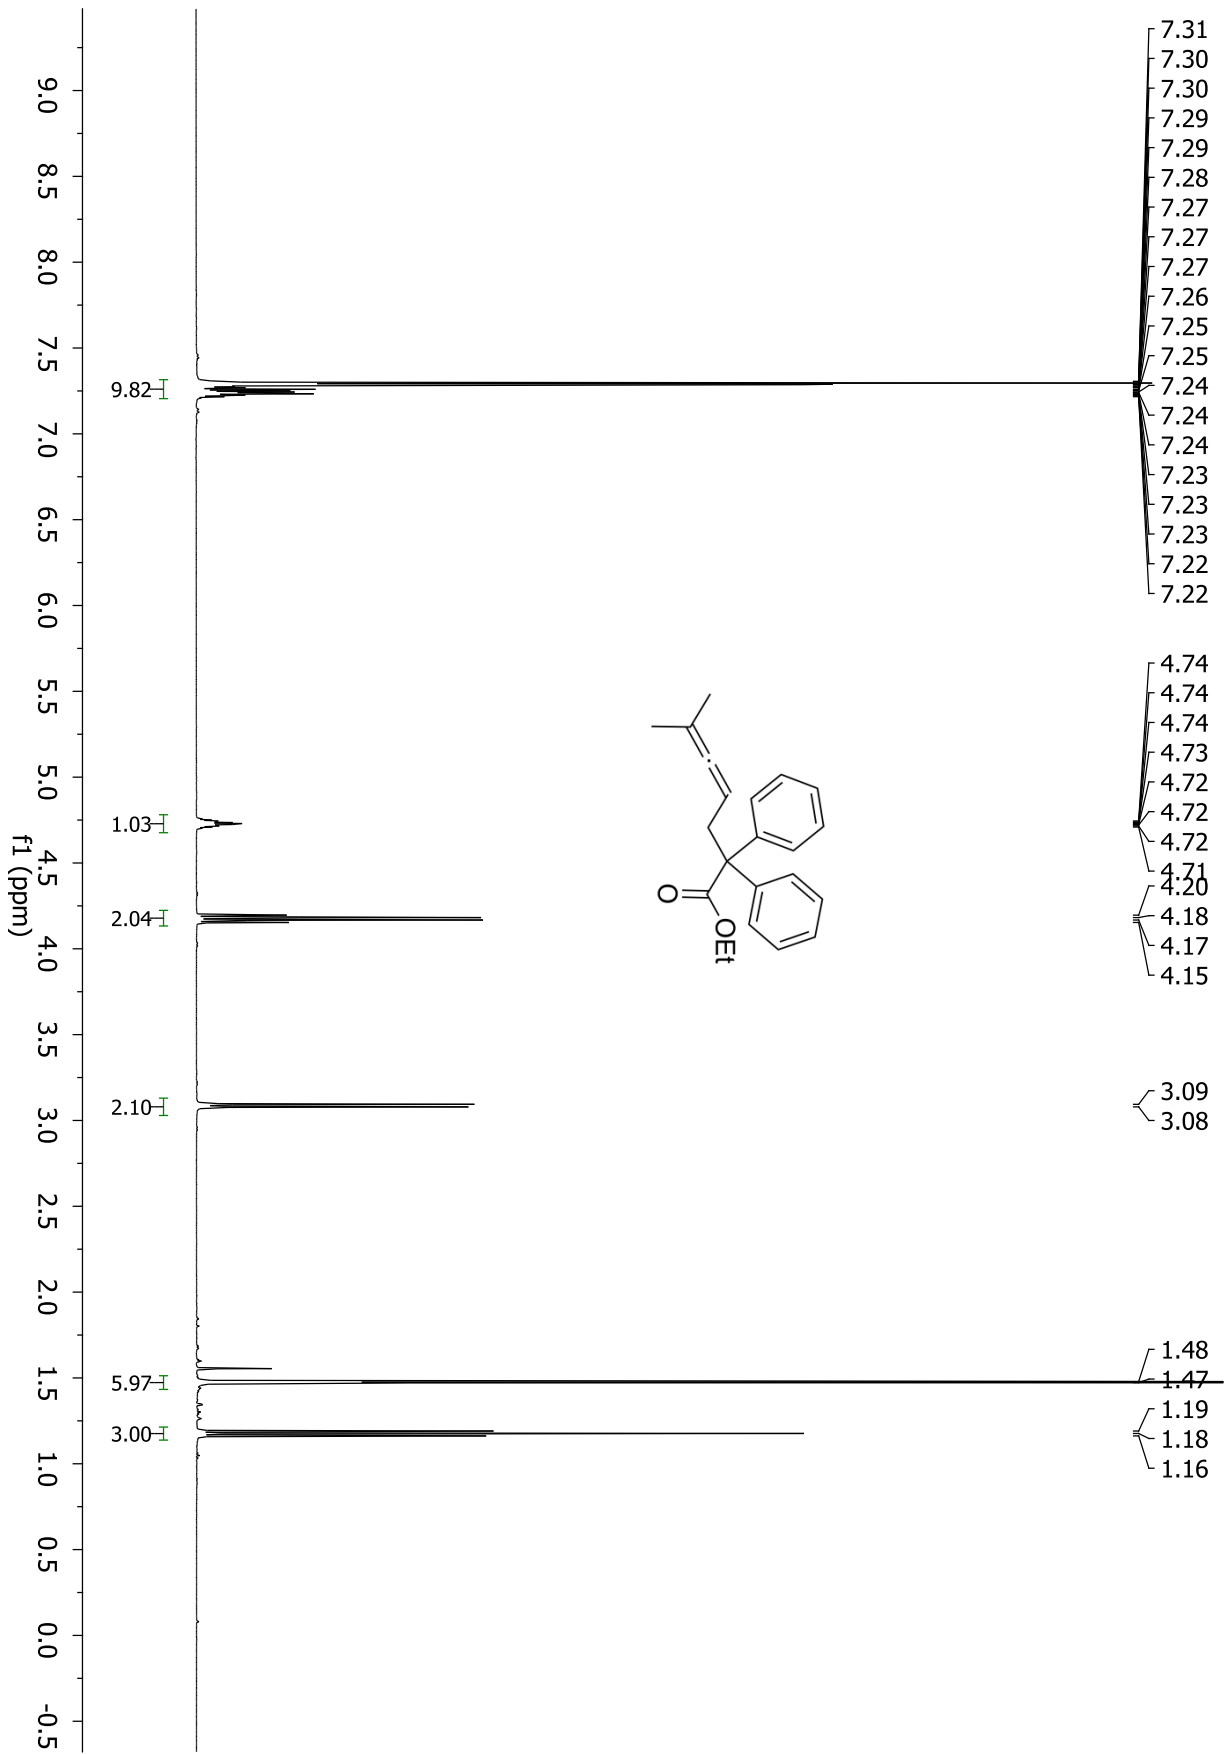

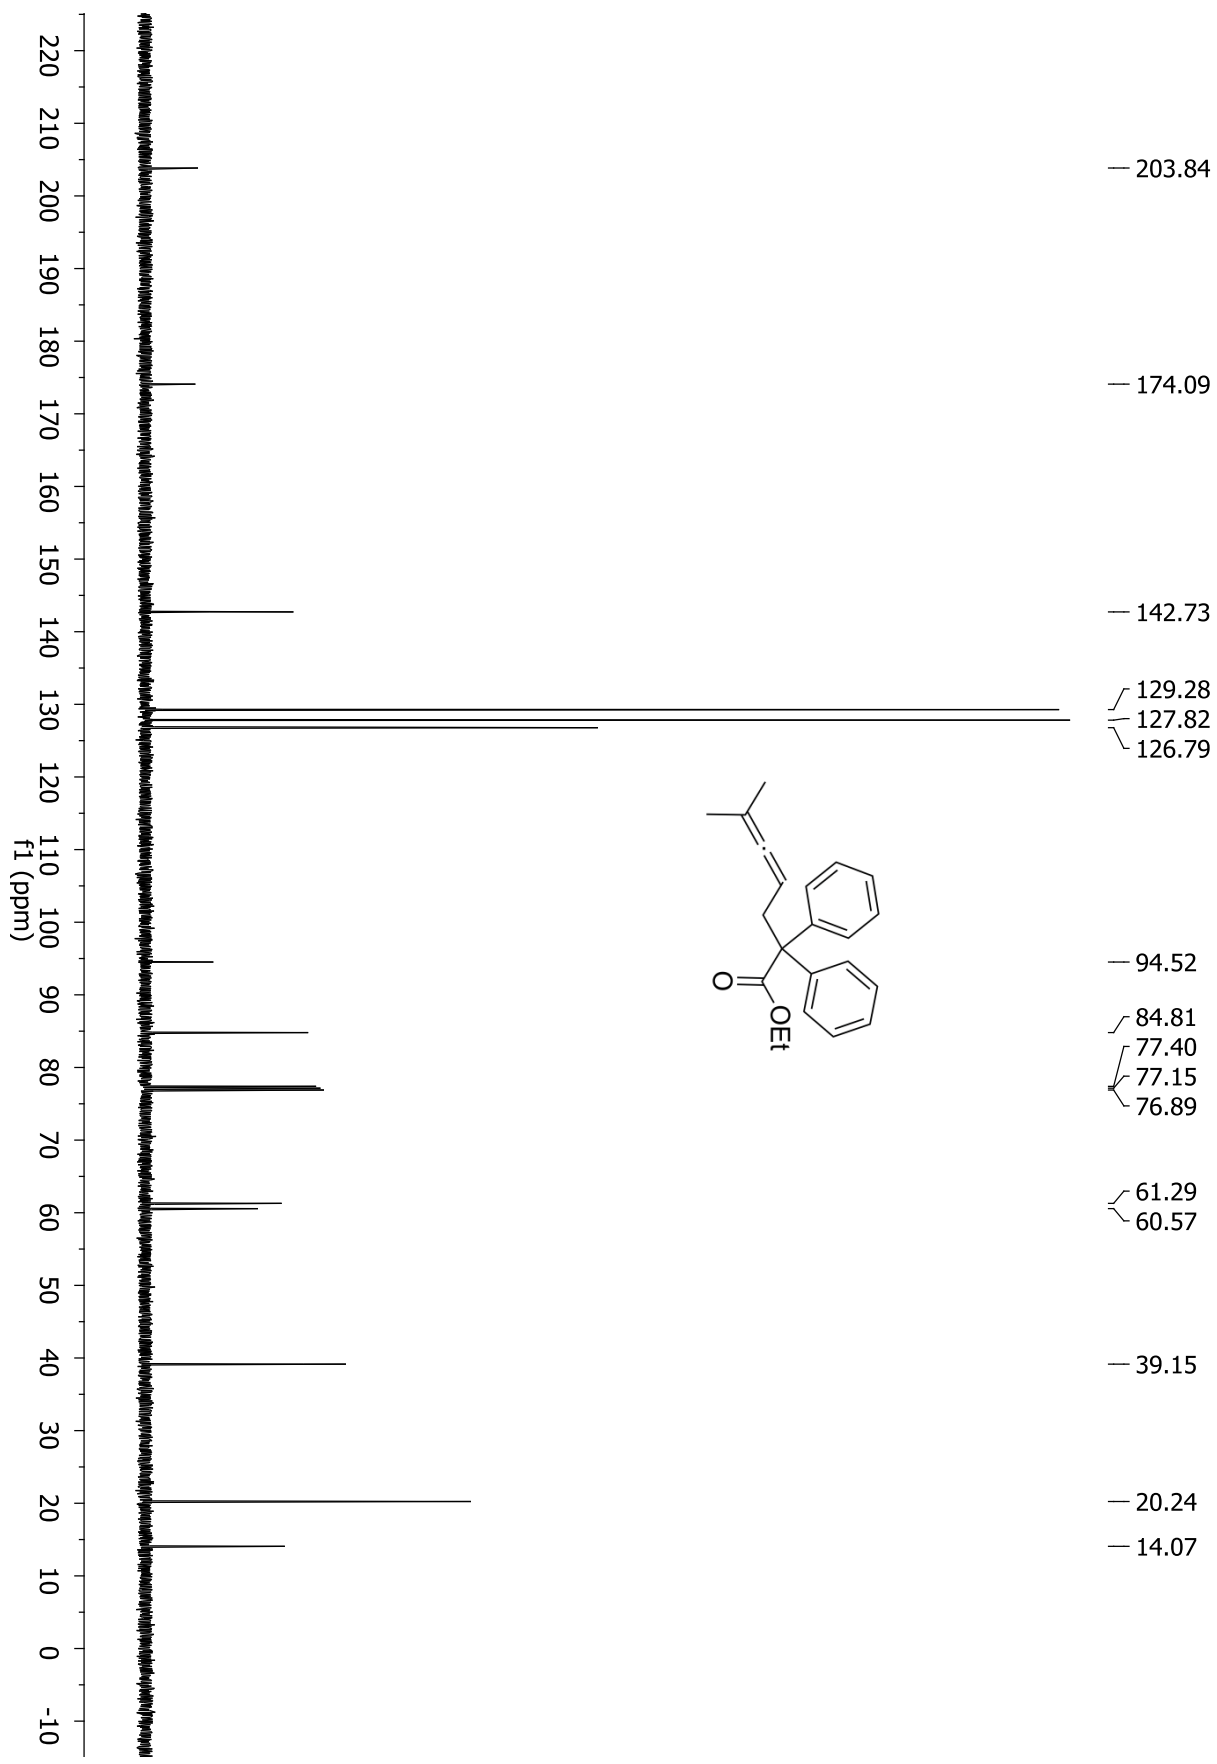

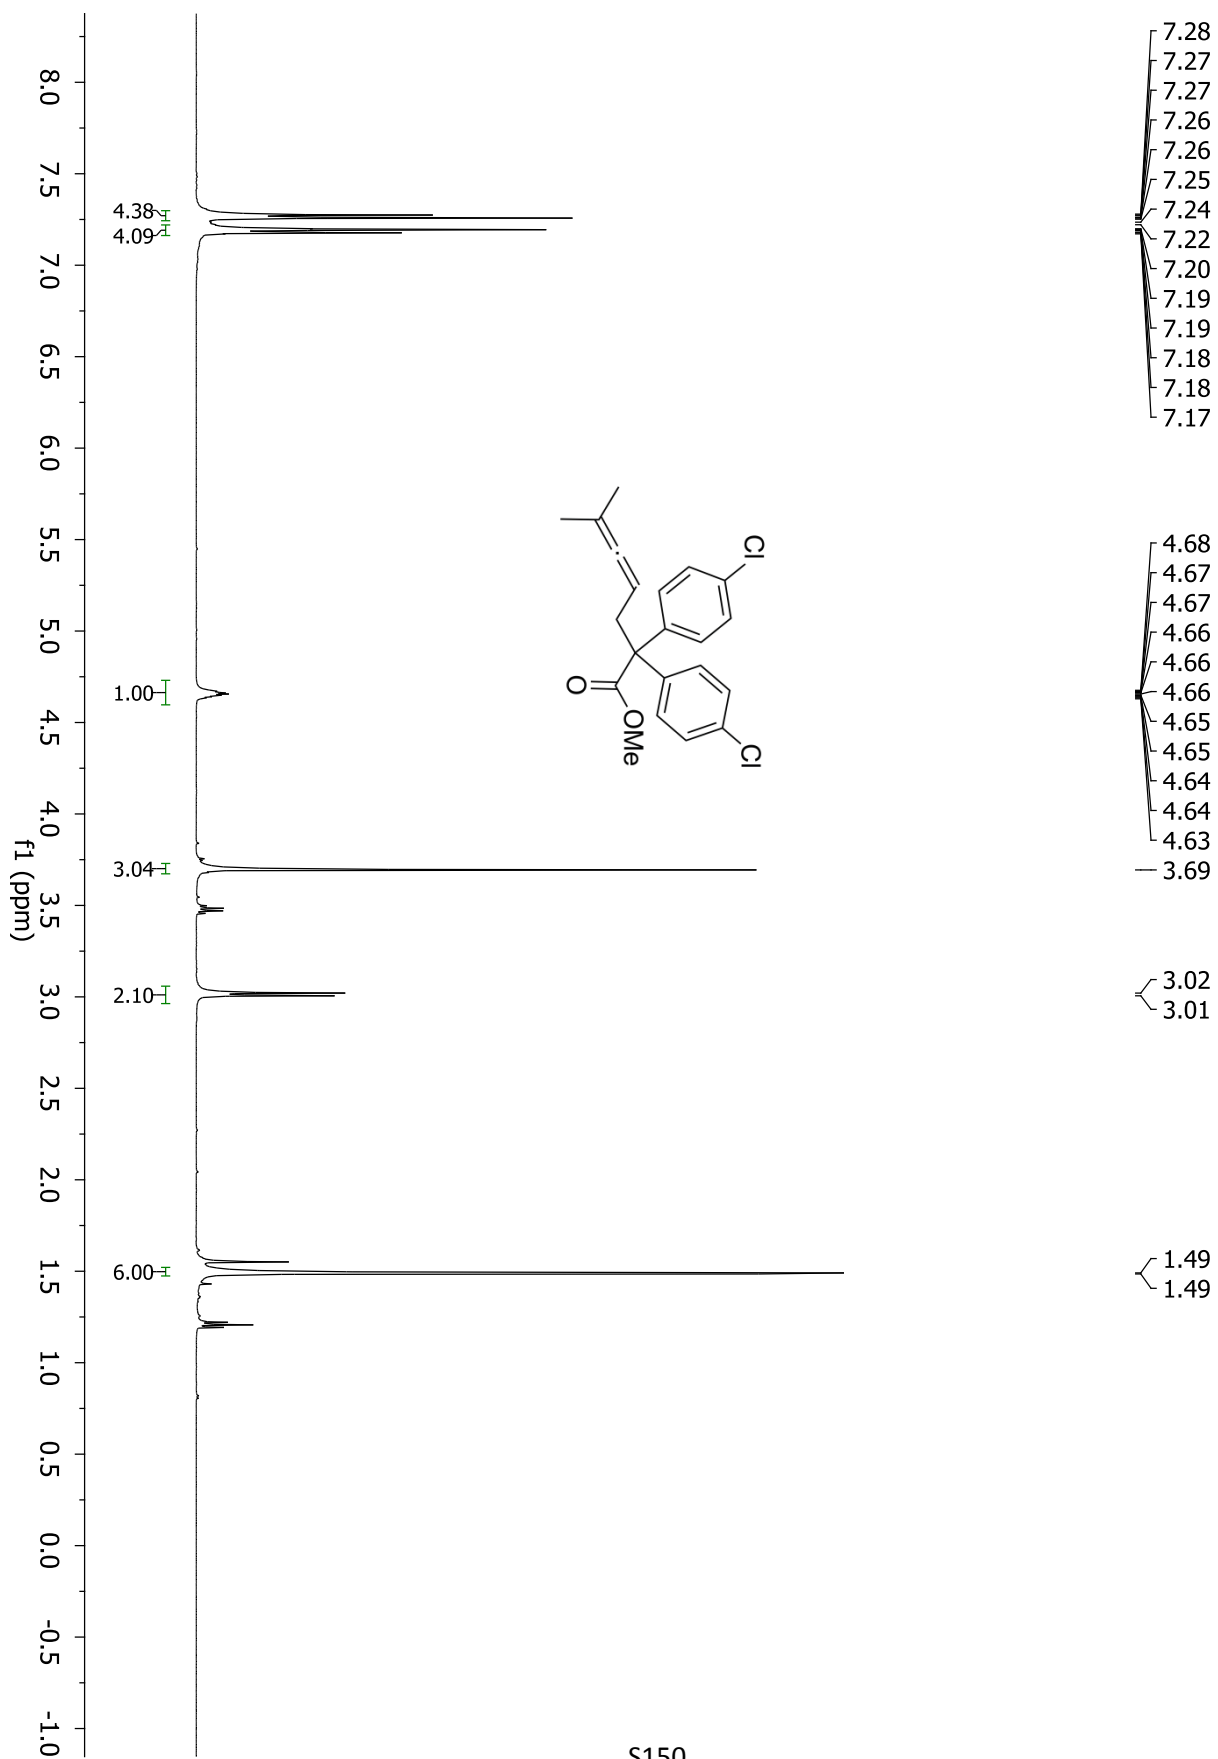

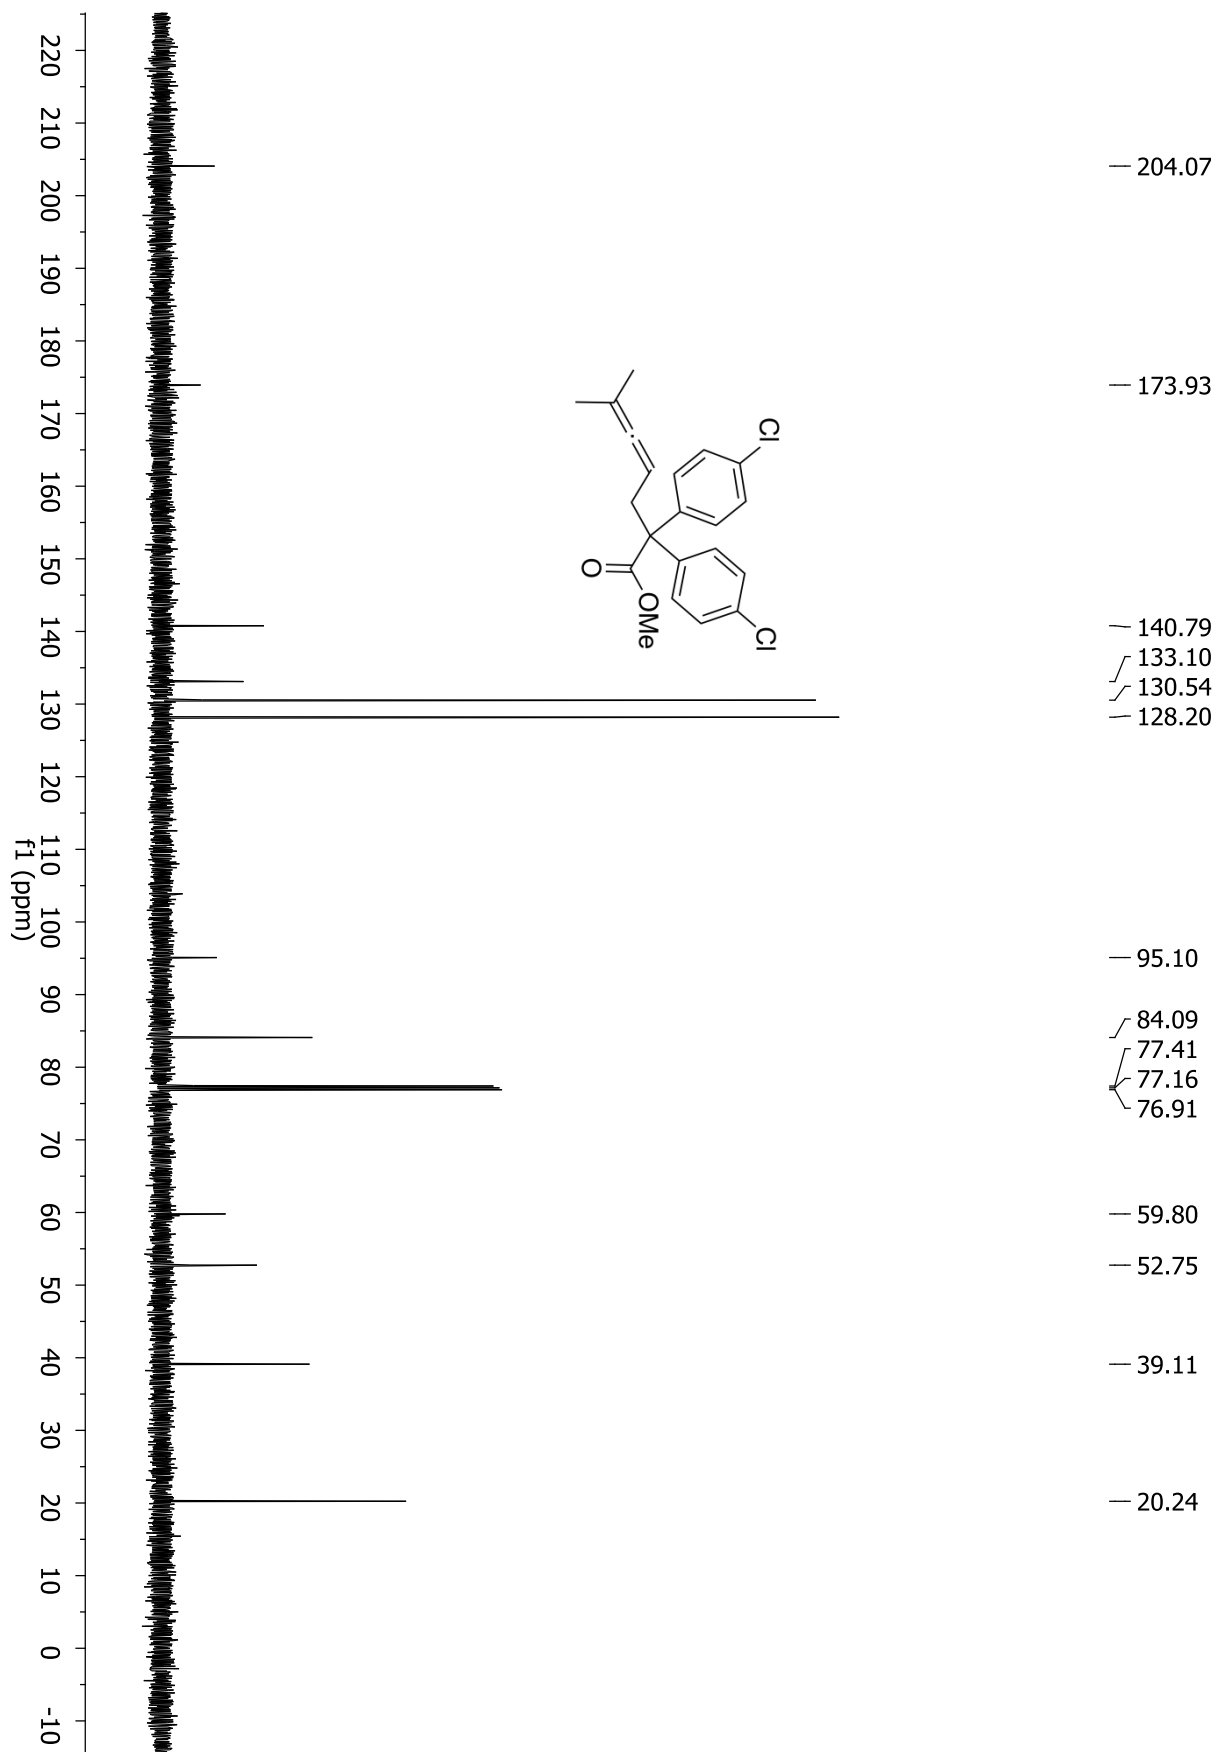



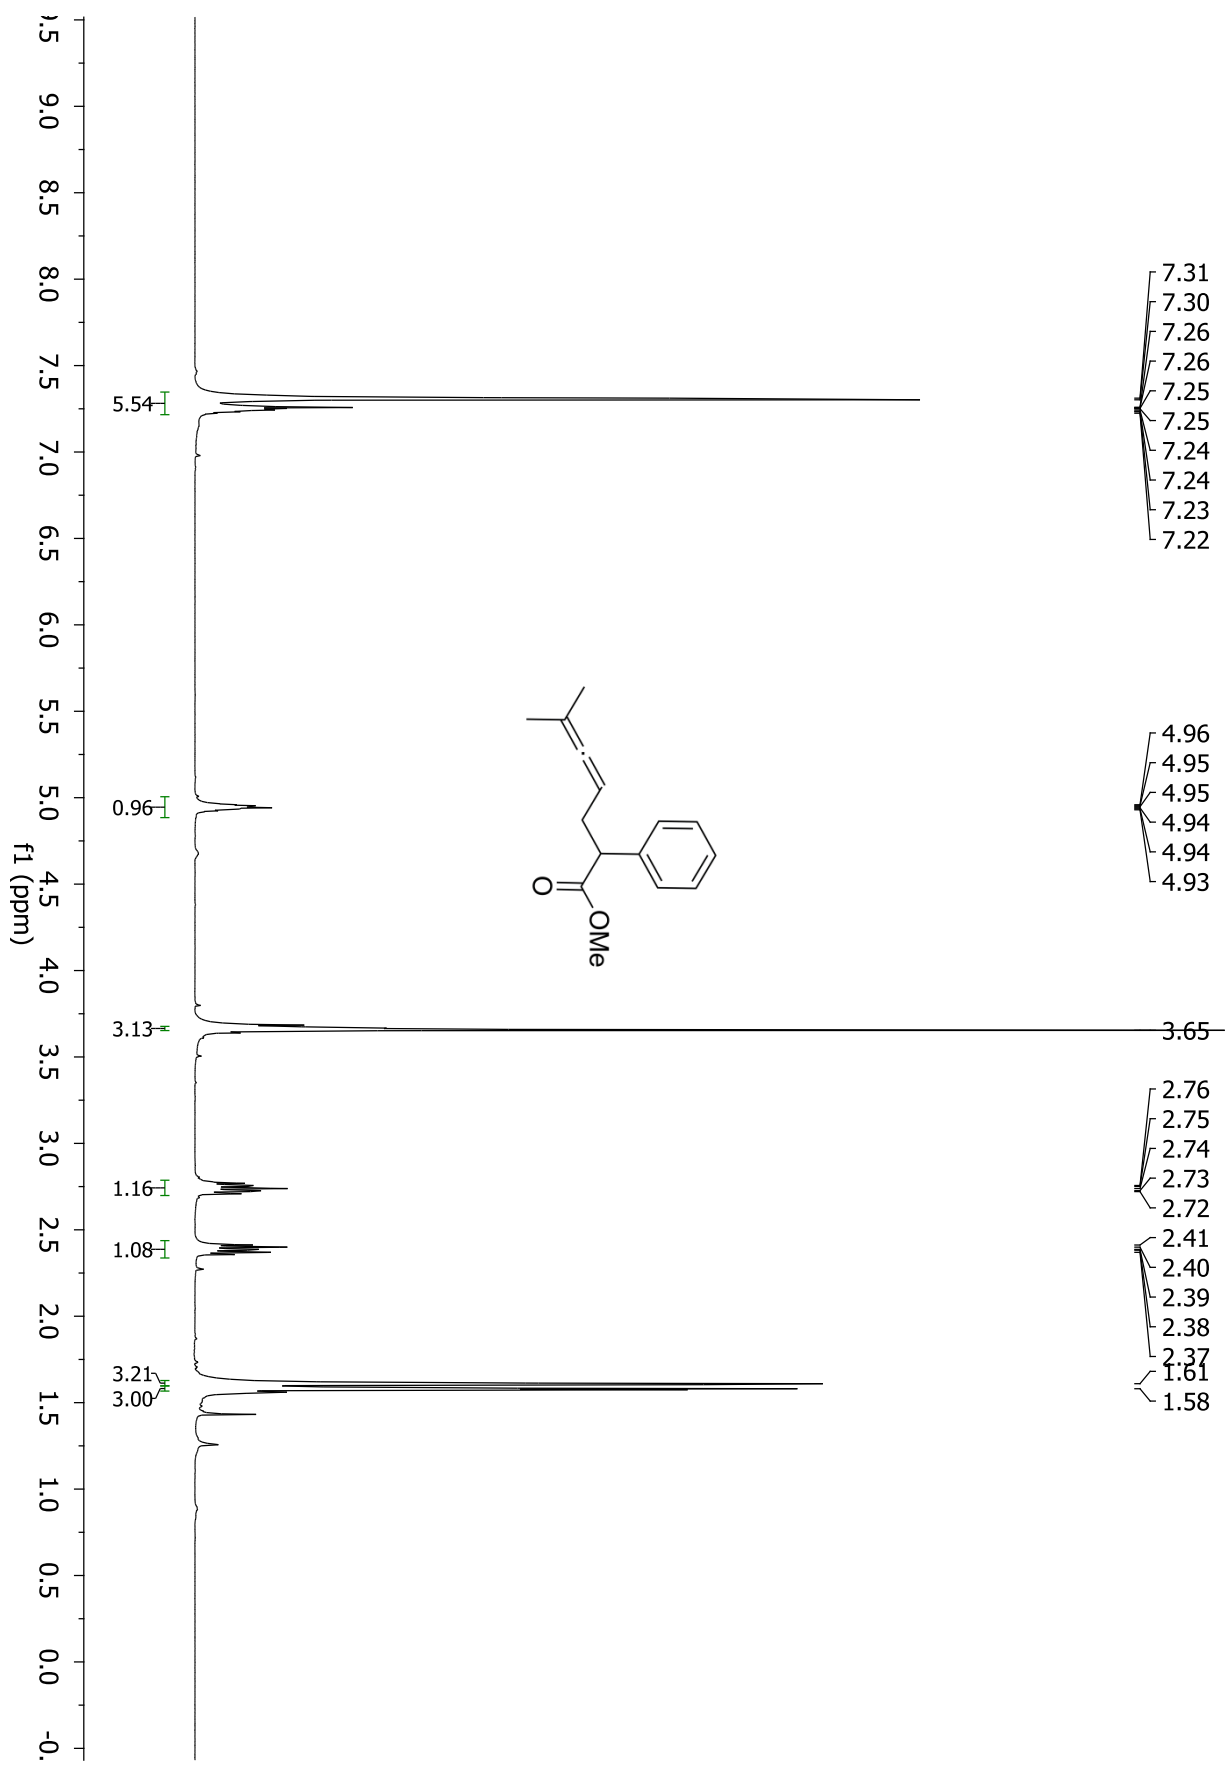

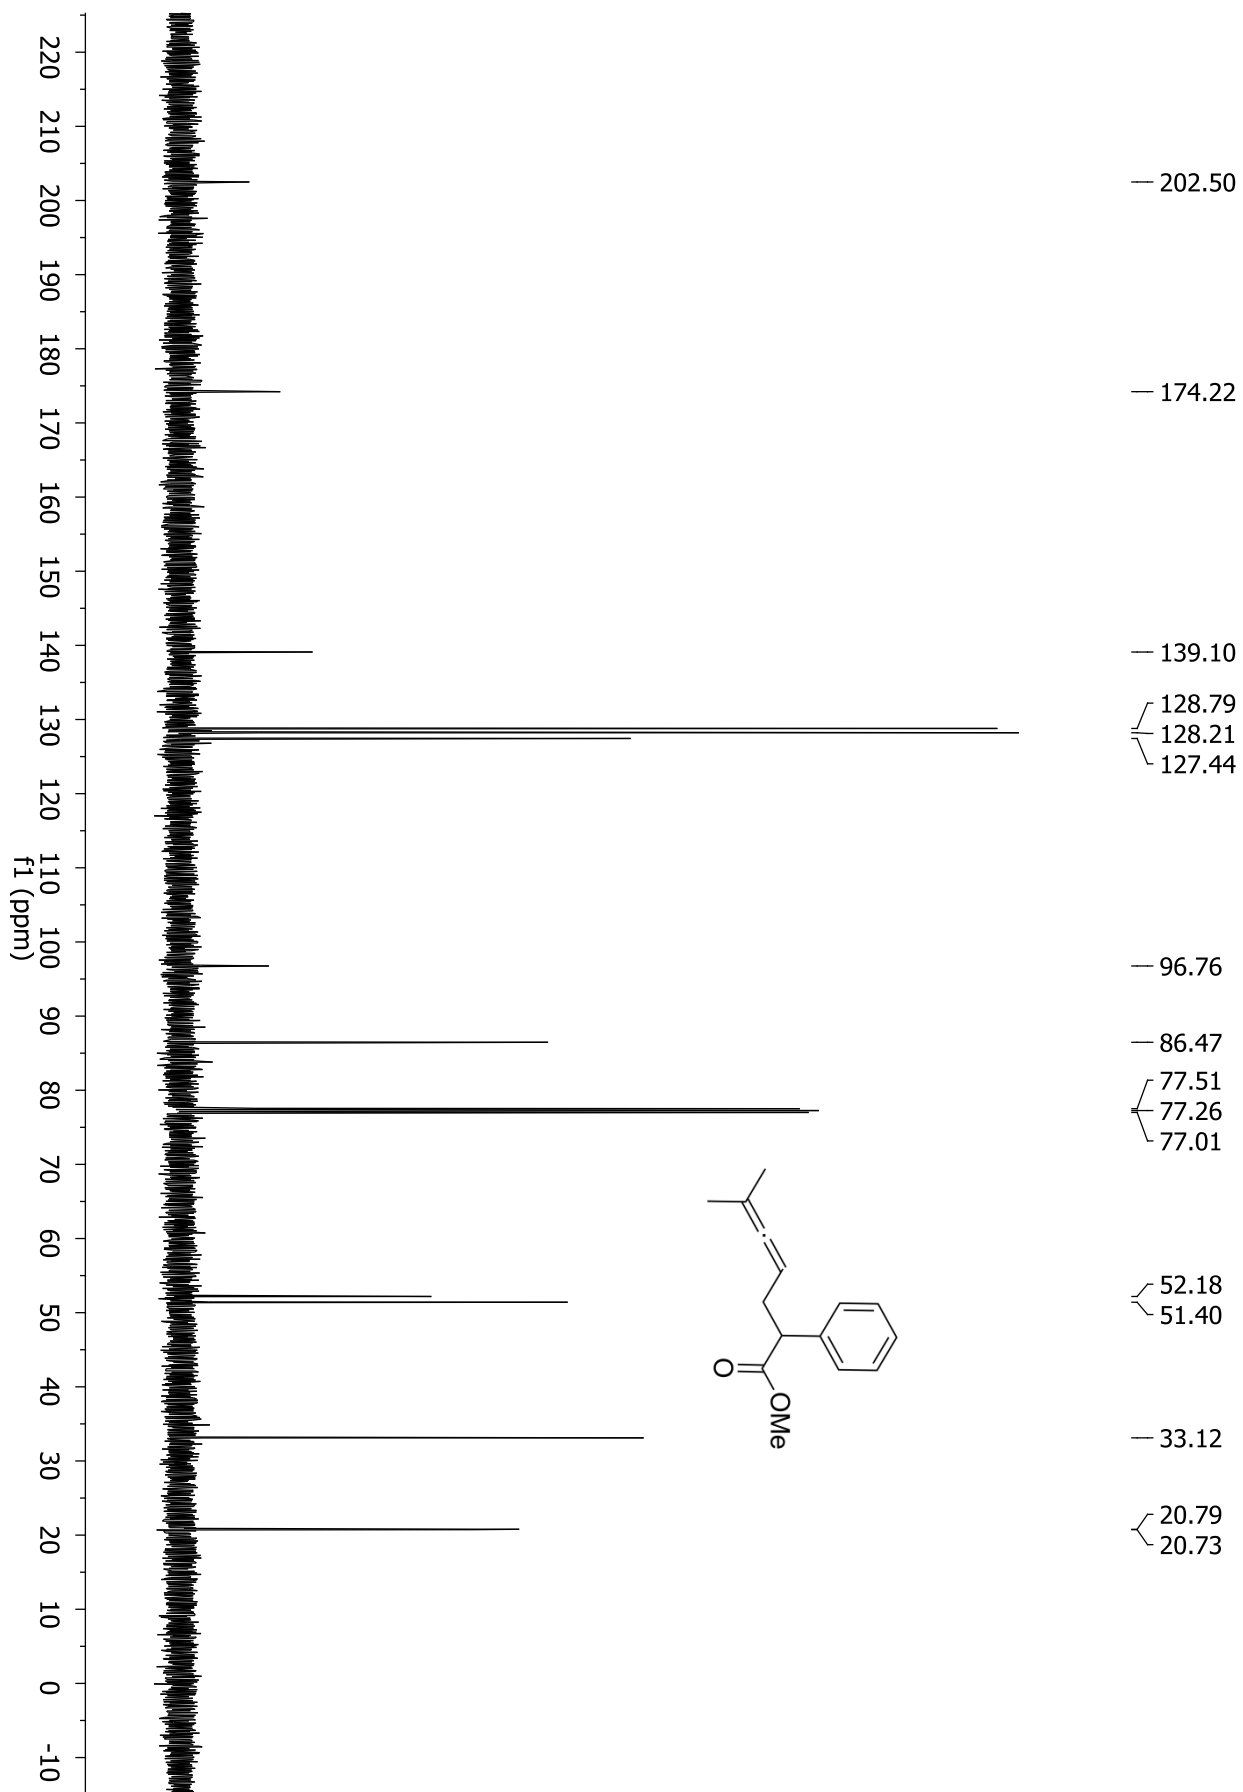

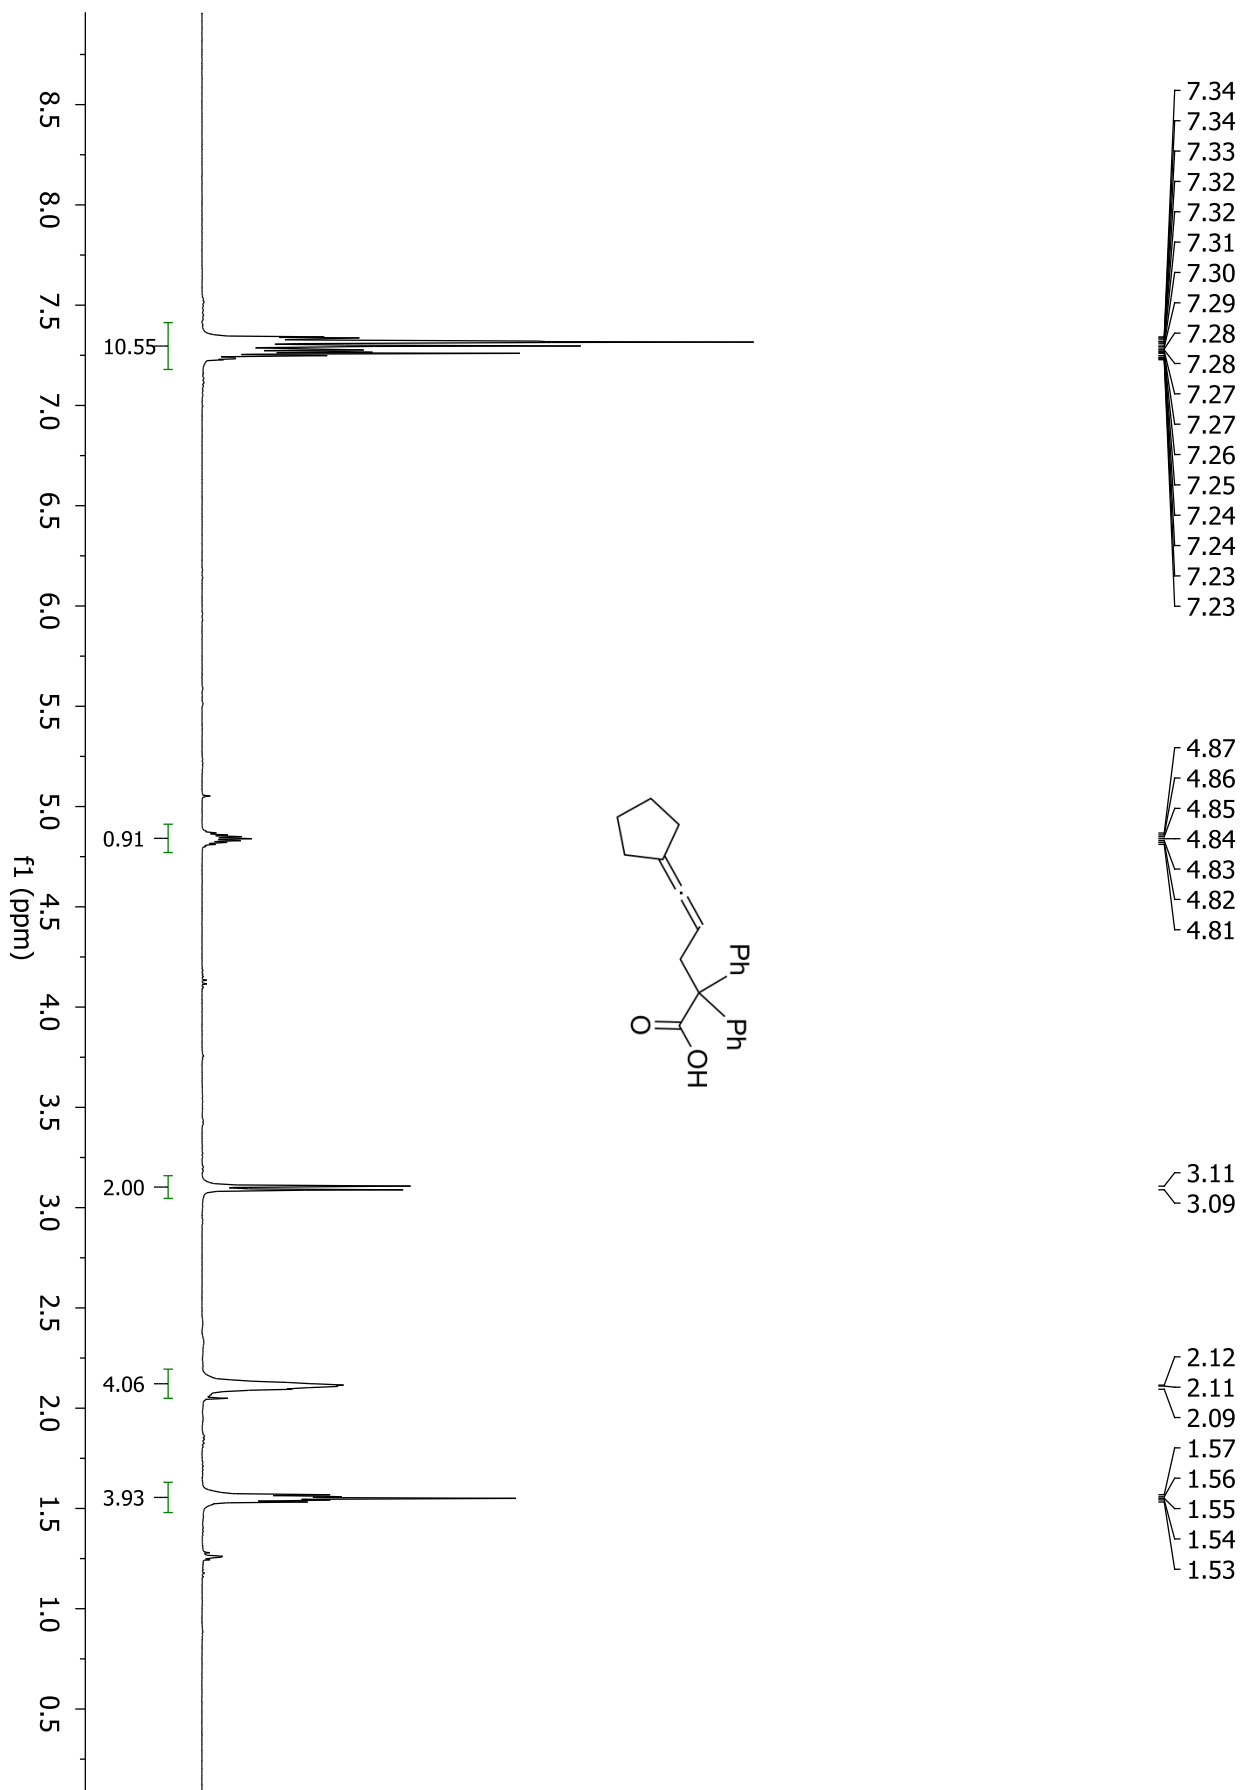

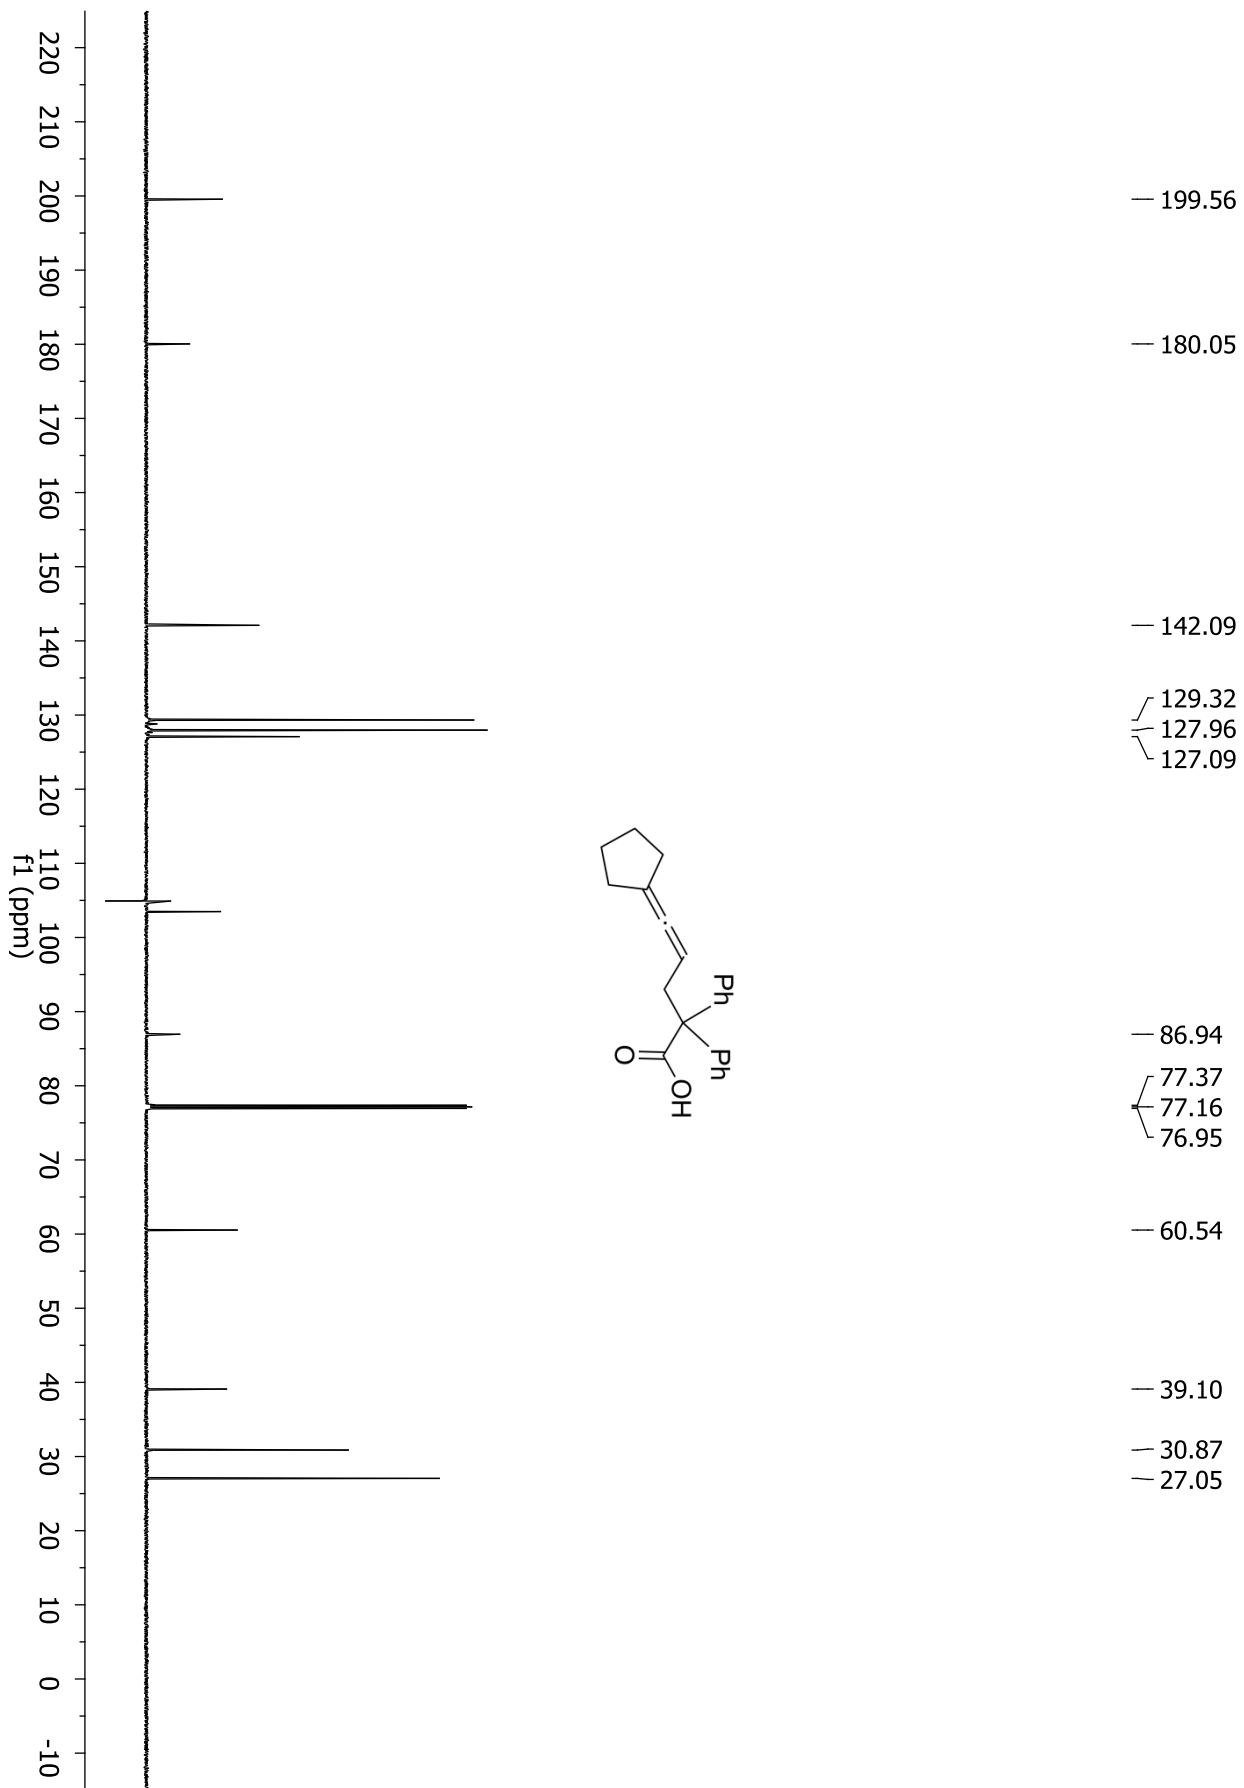

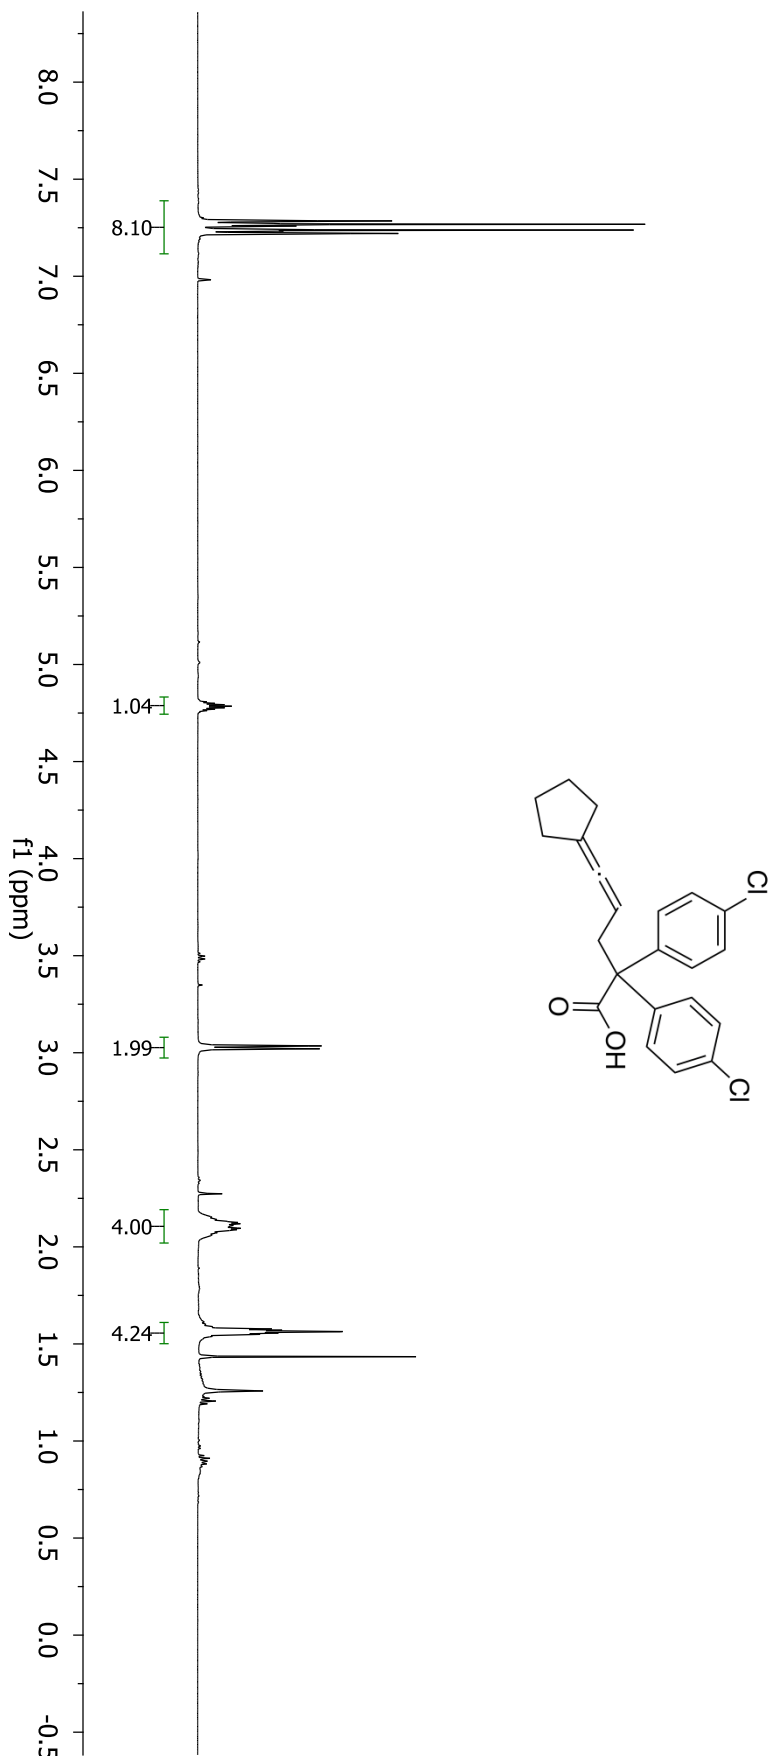

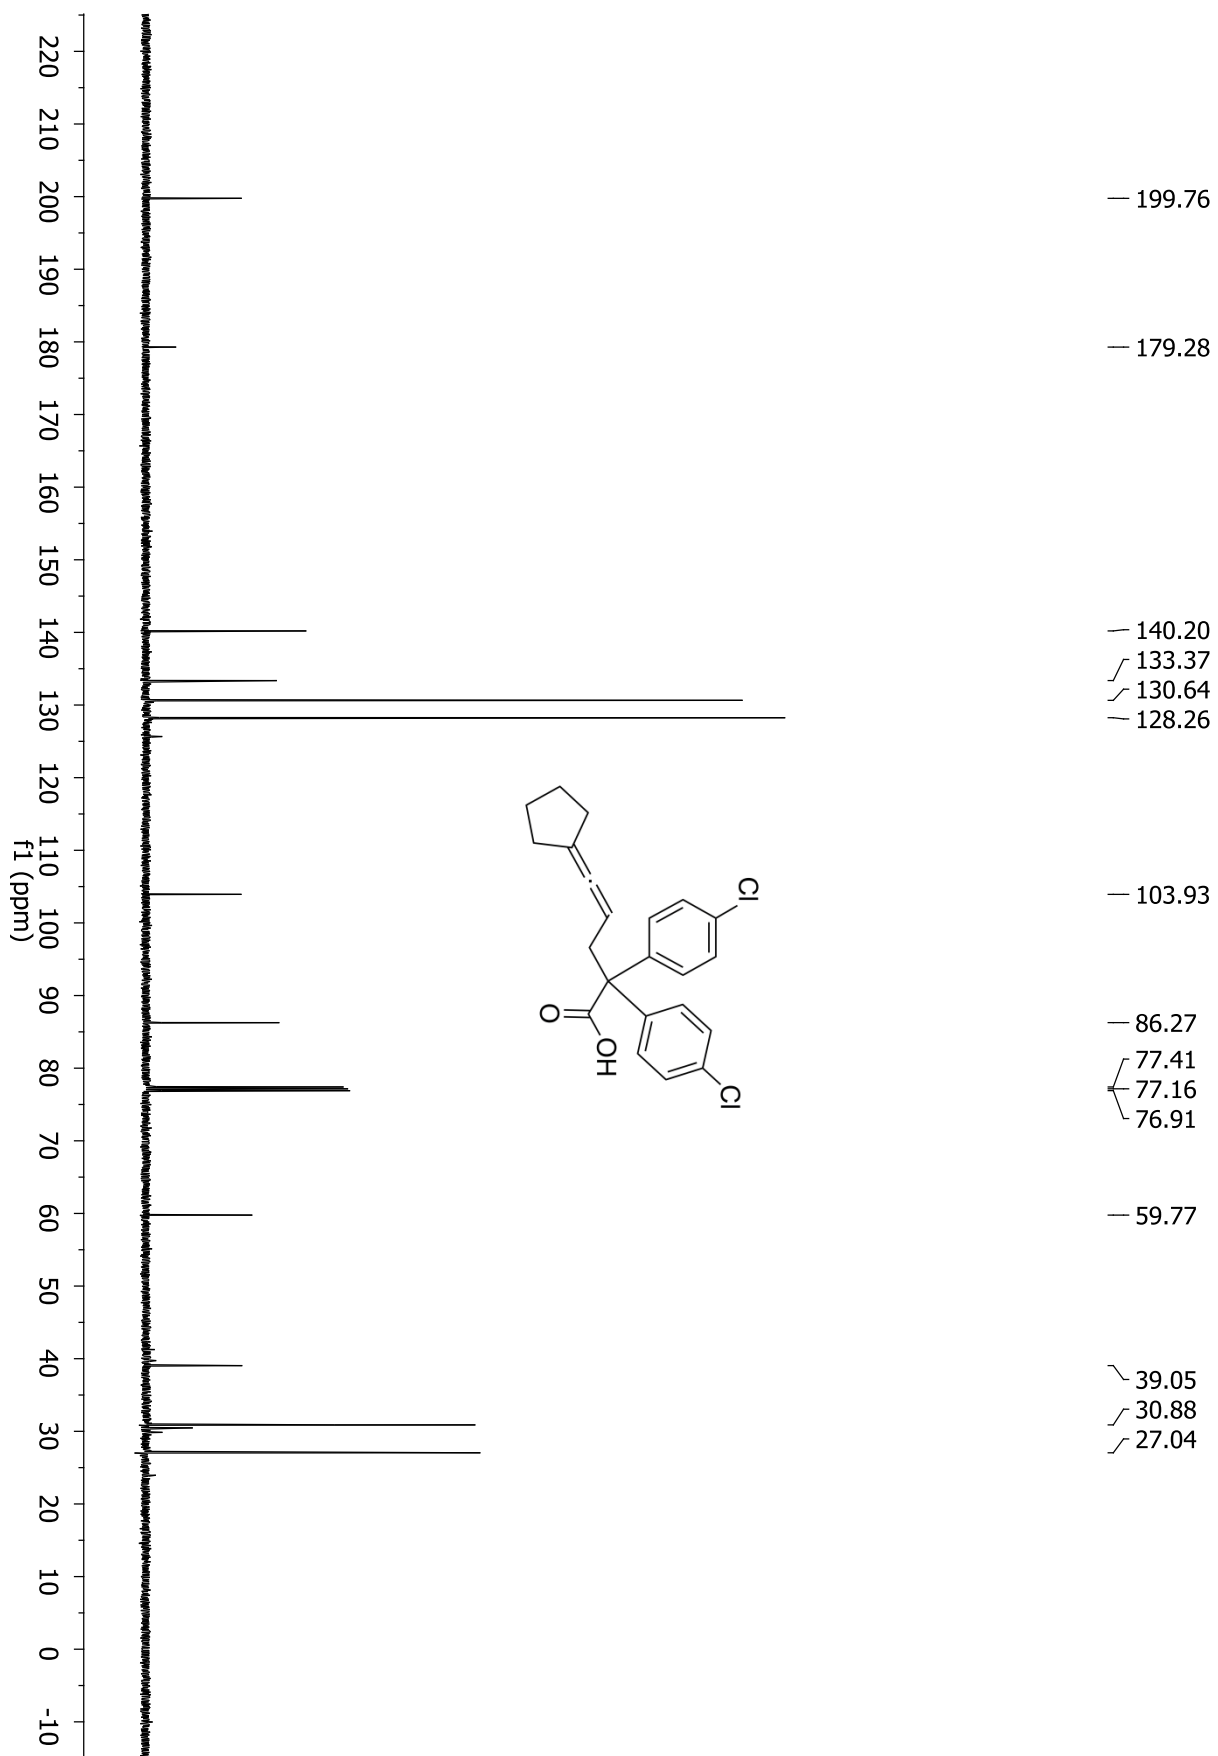

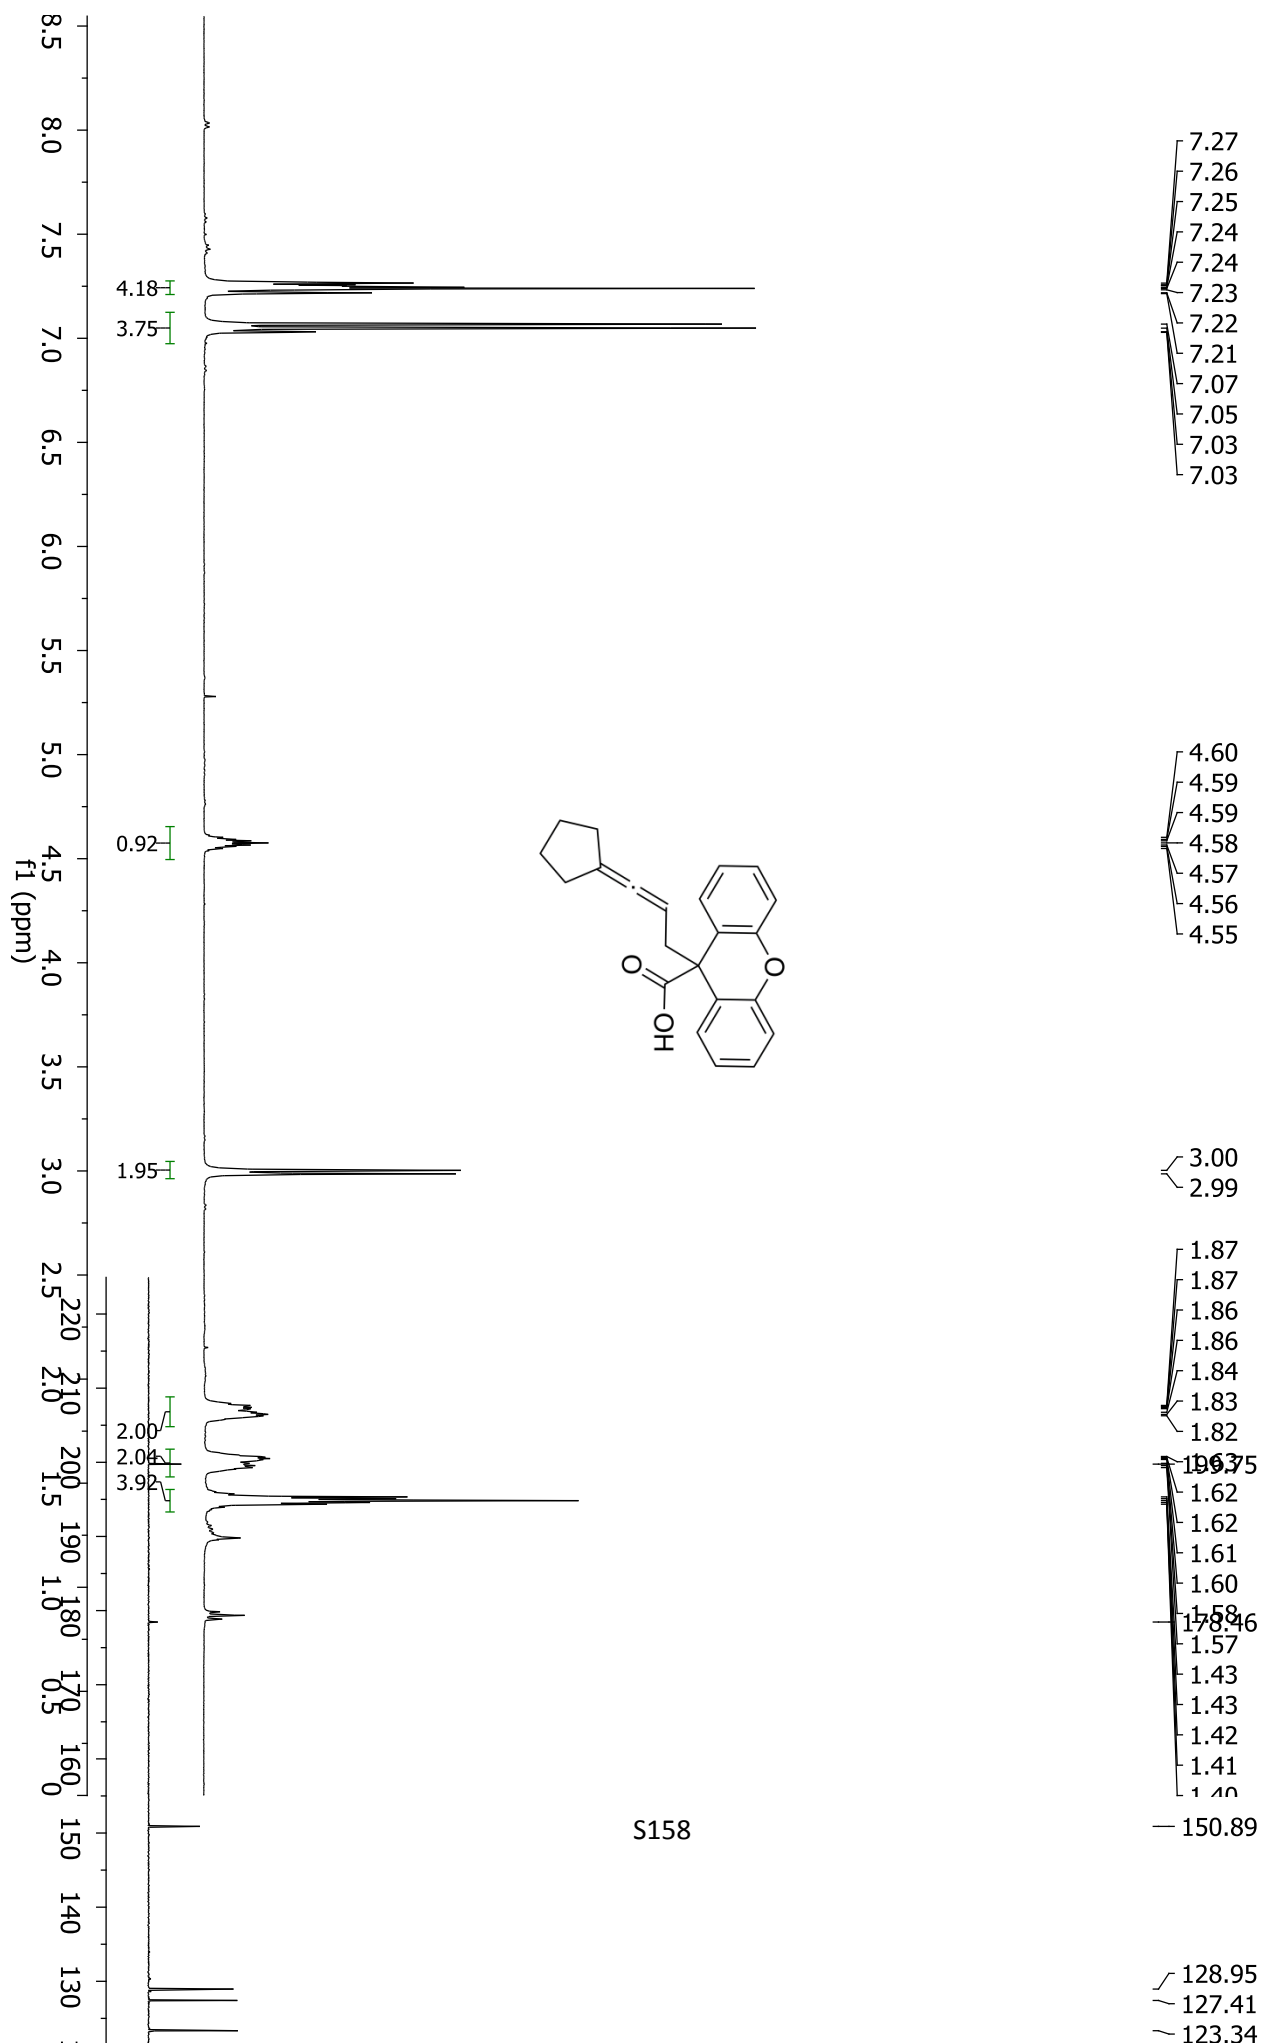

S158





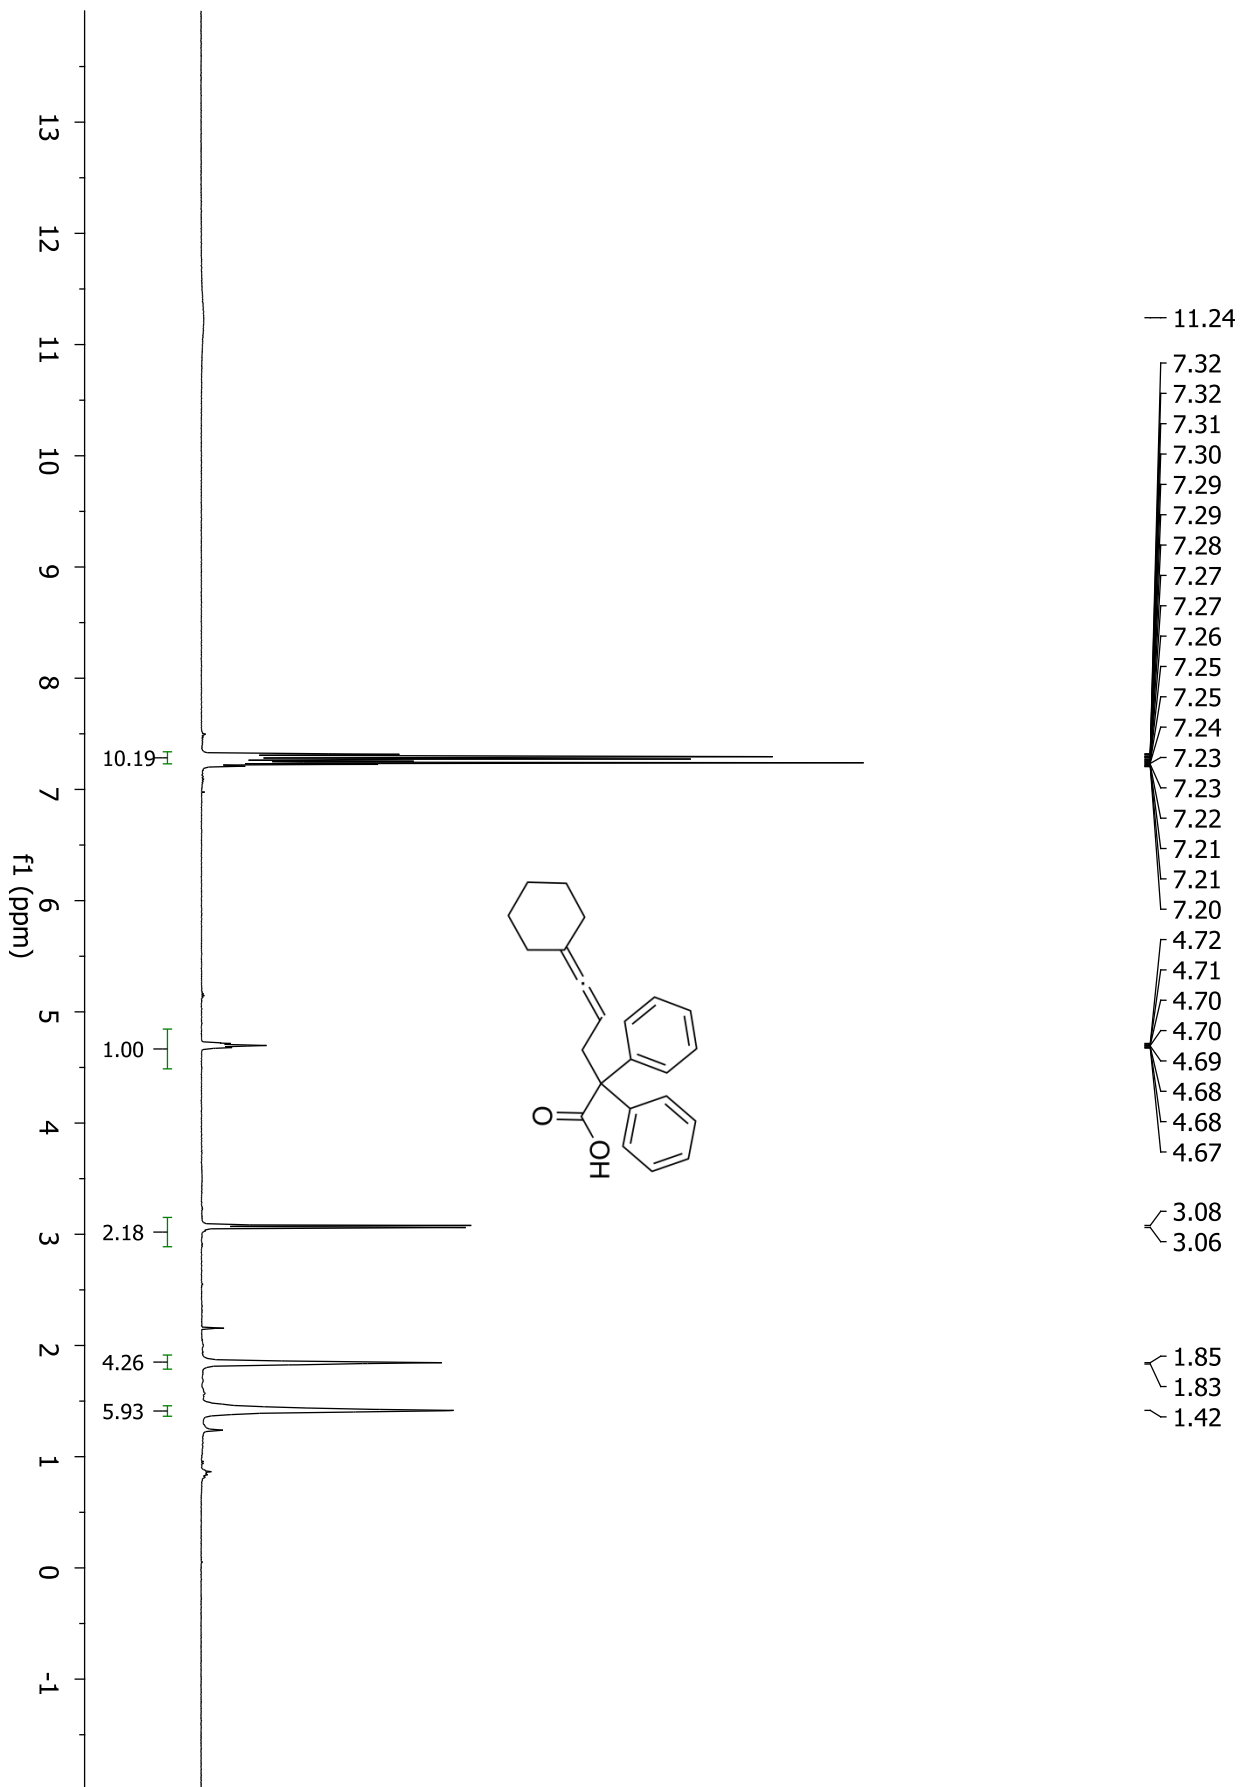

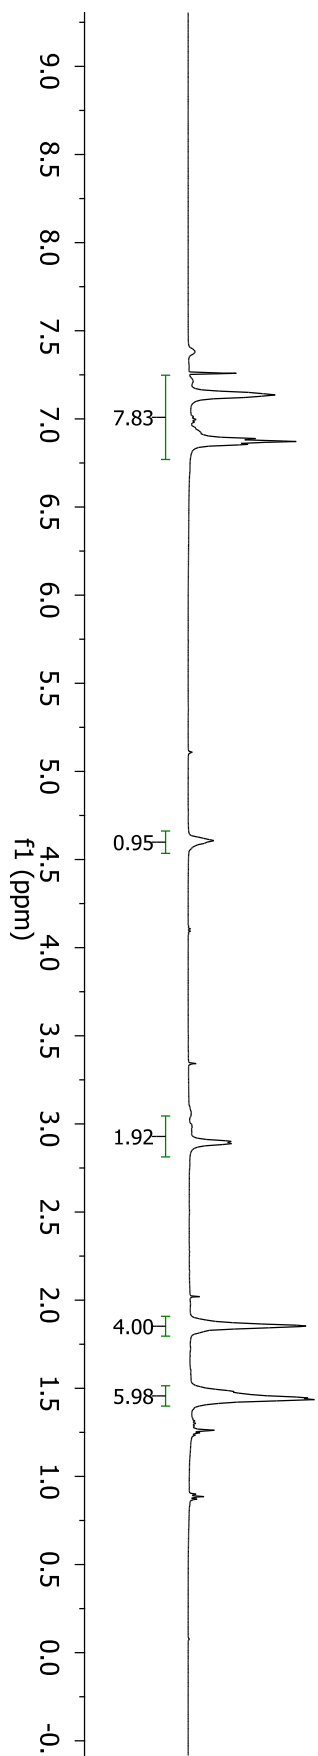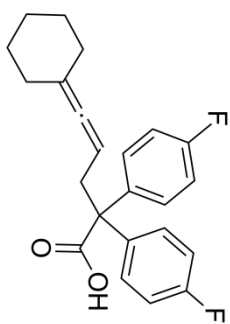

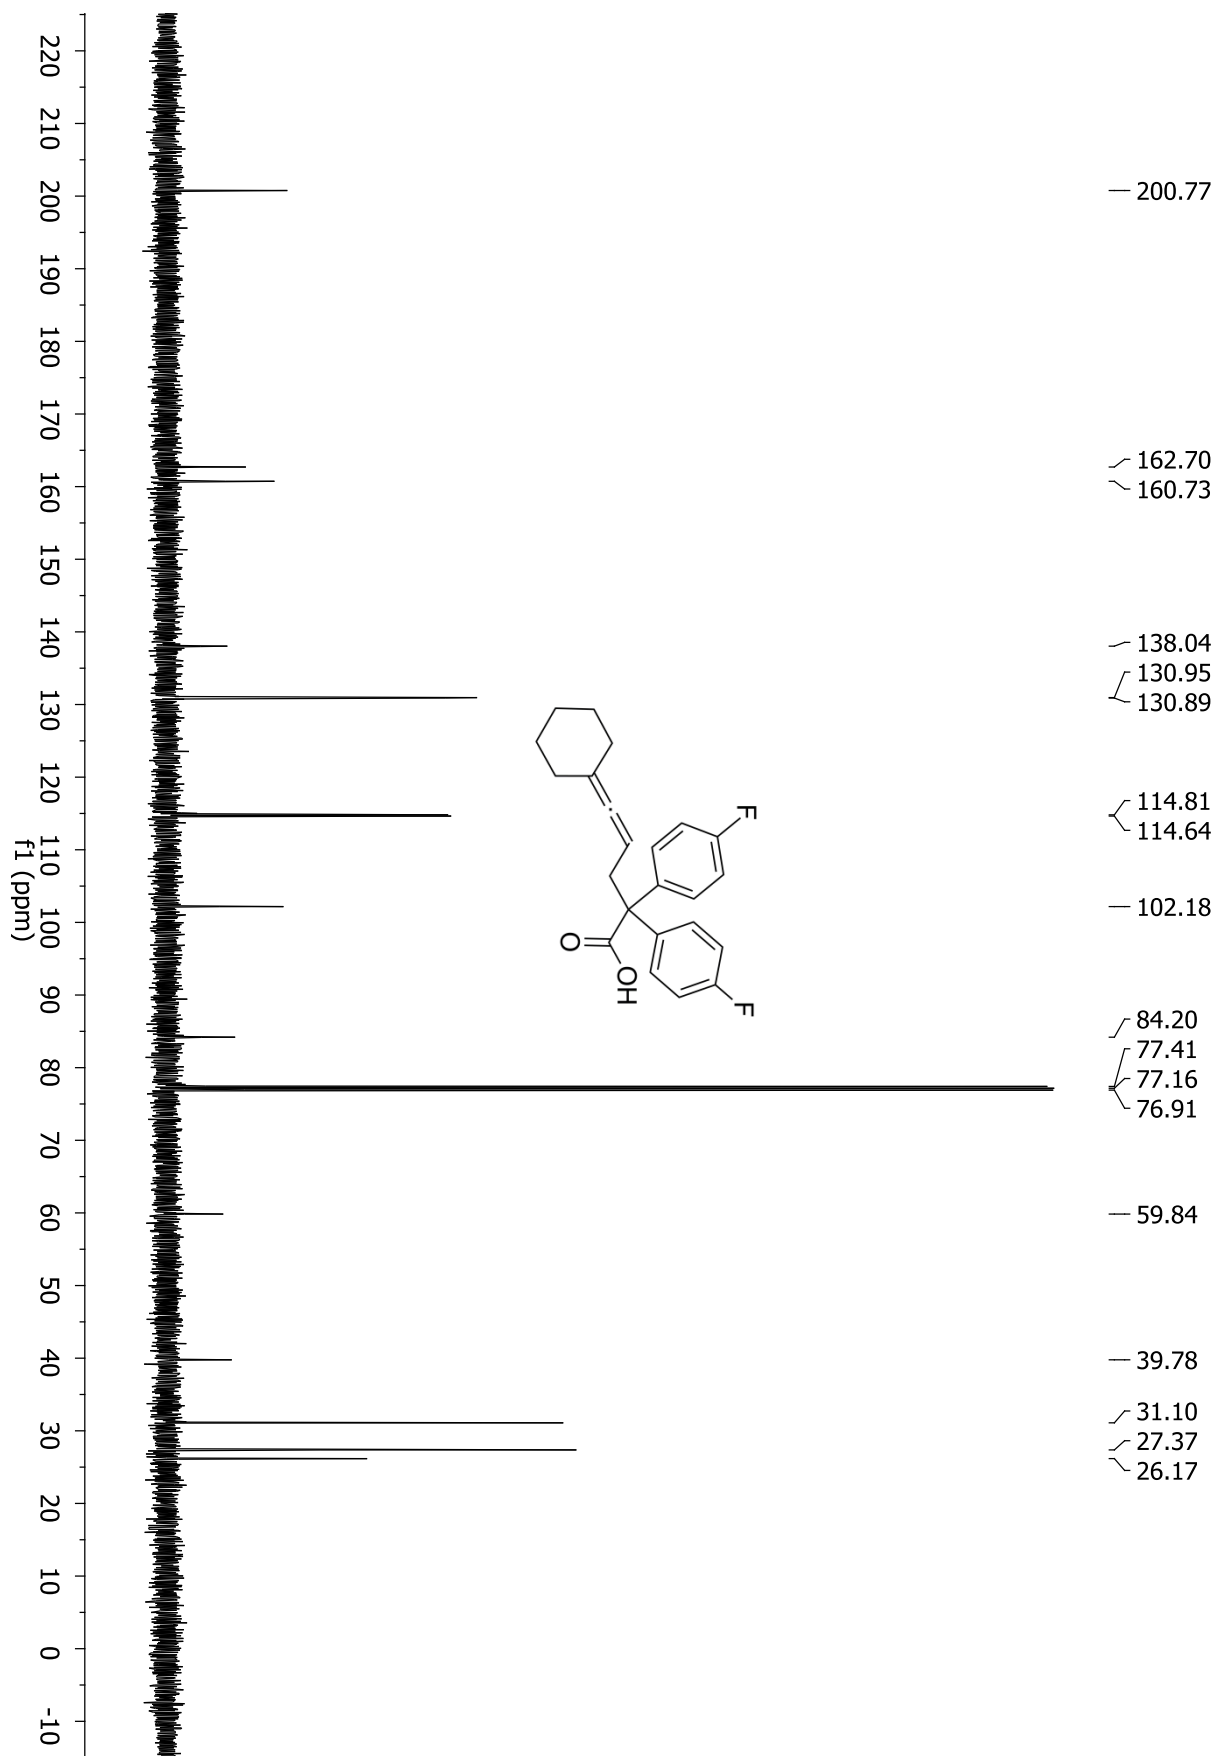

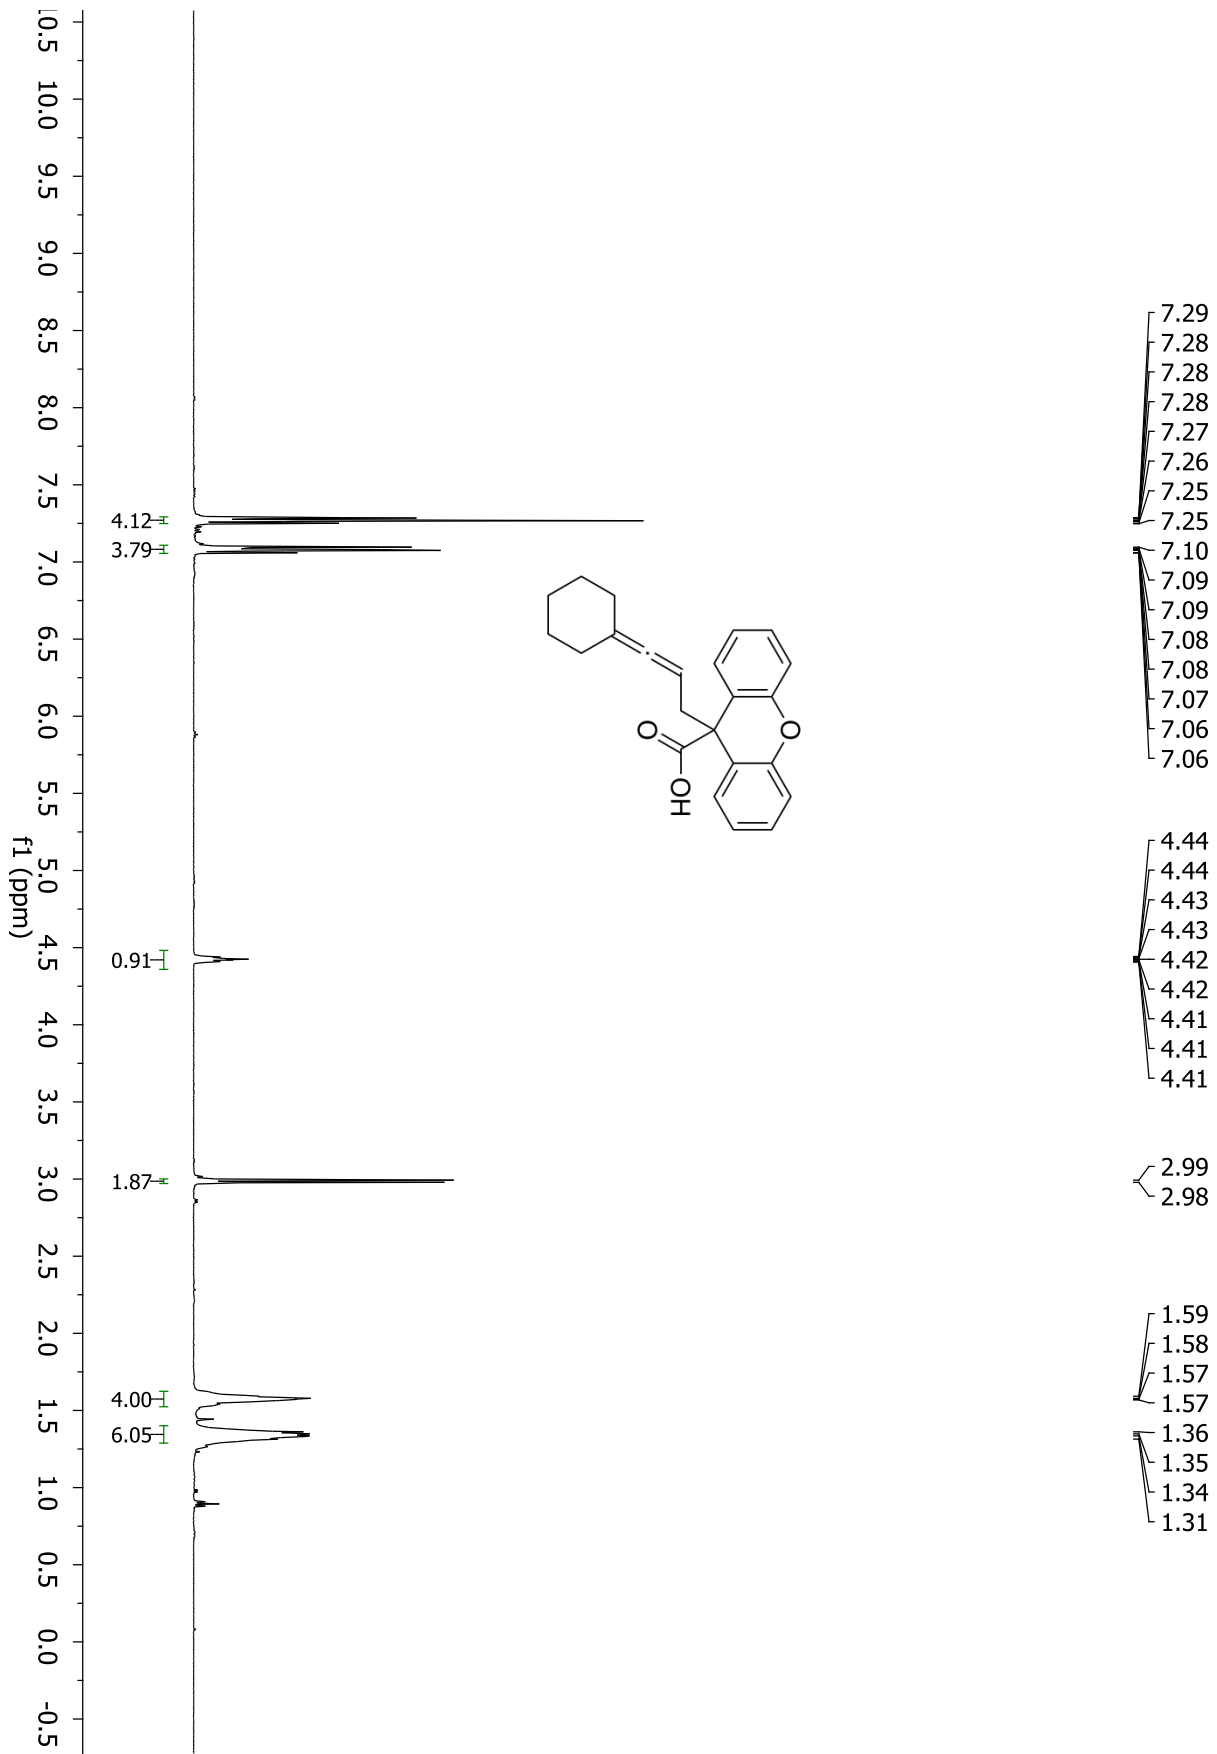

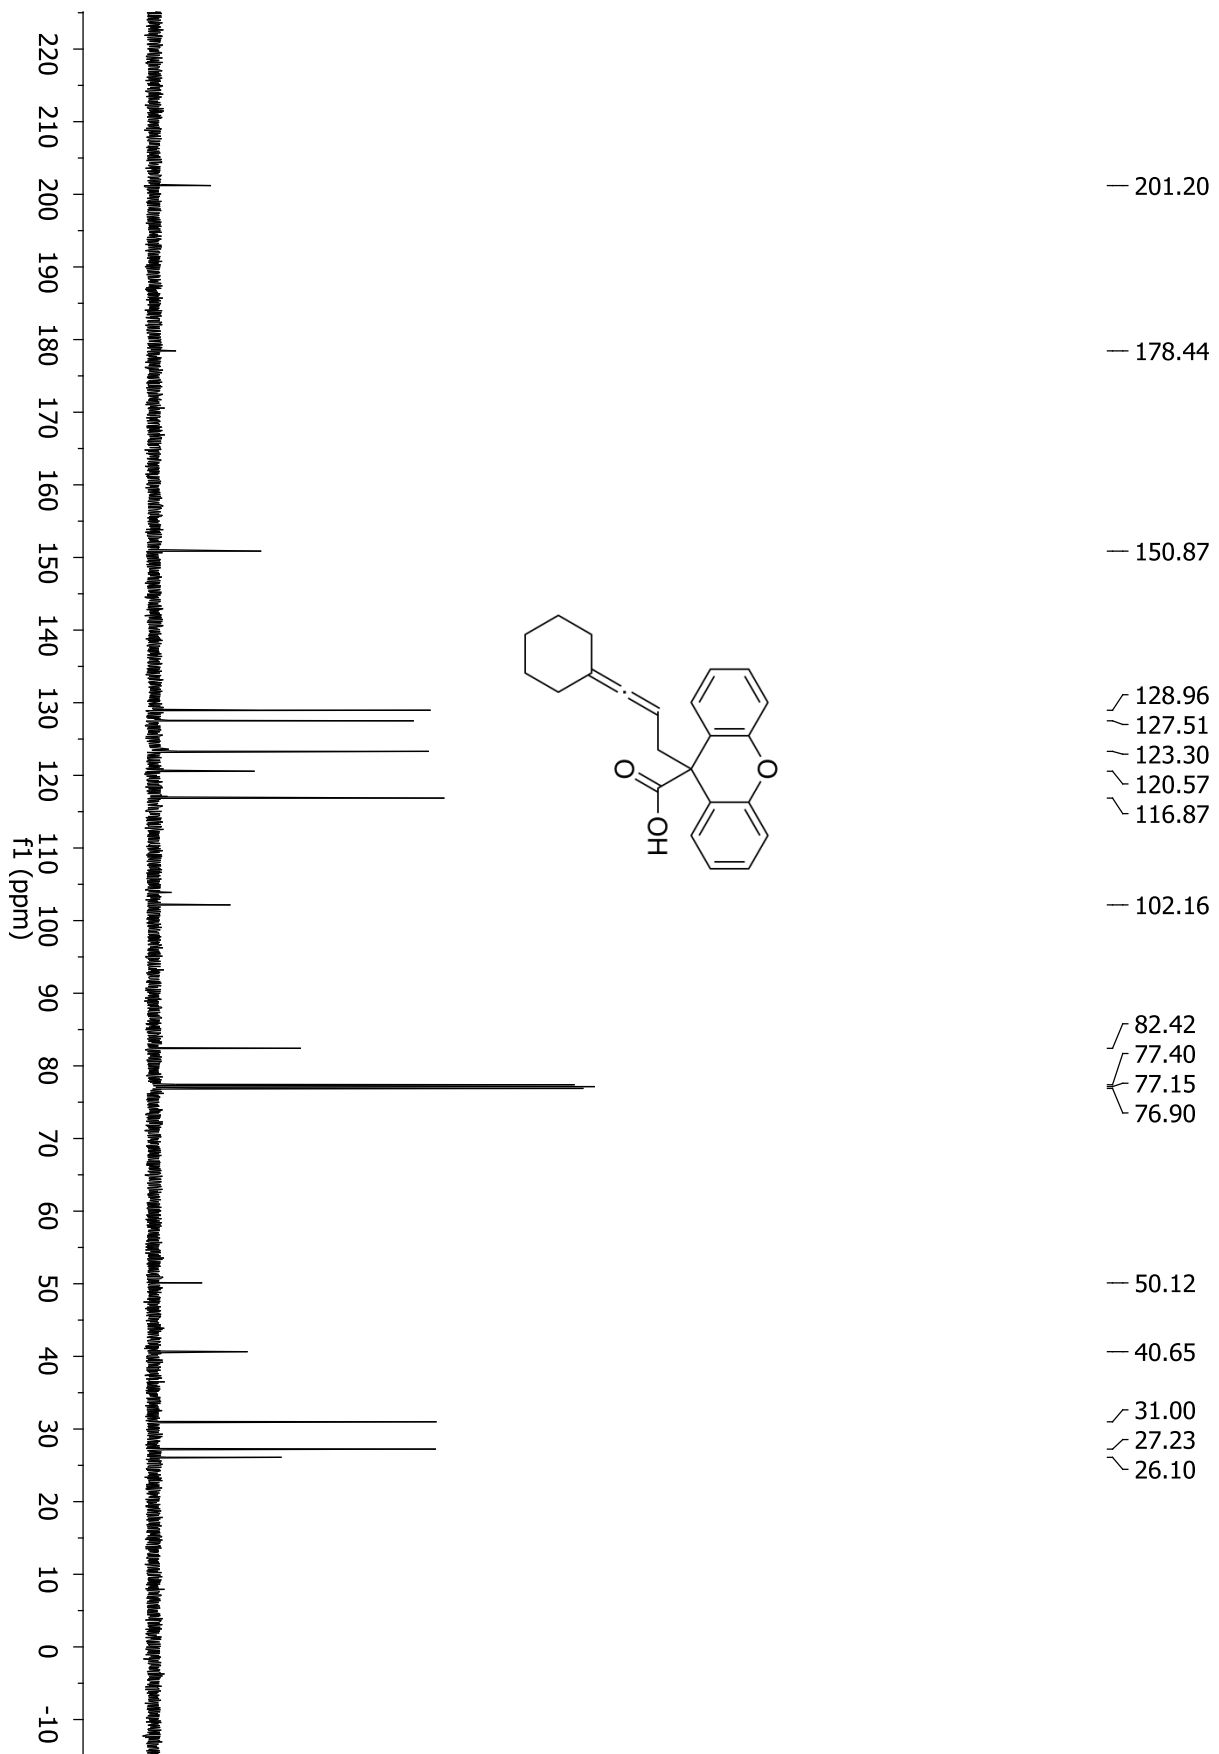

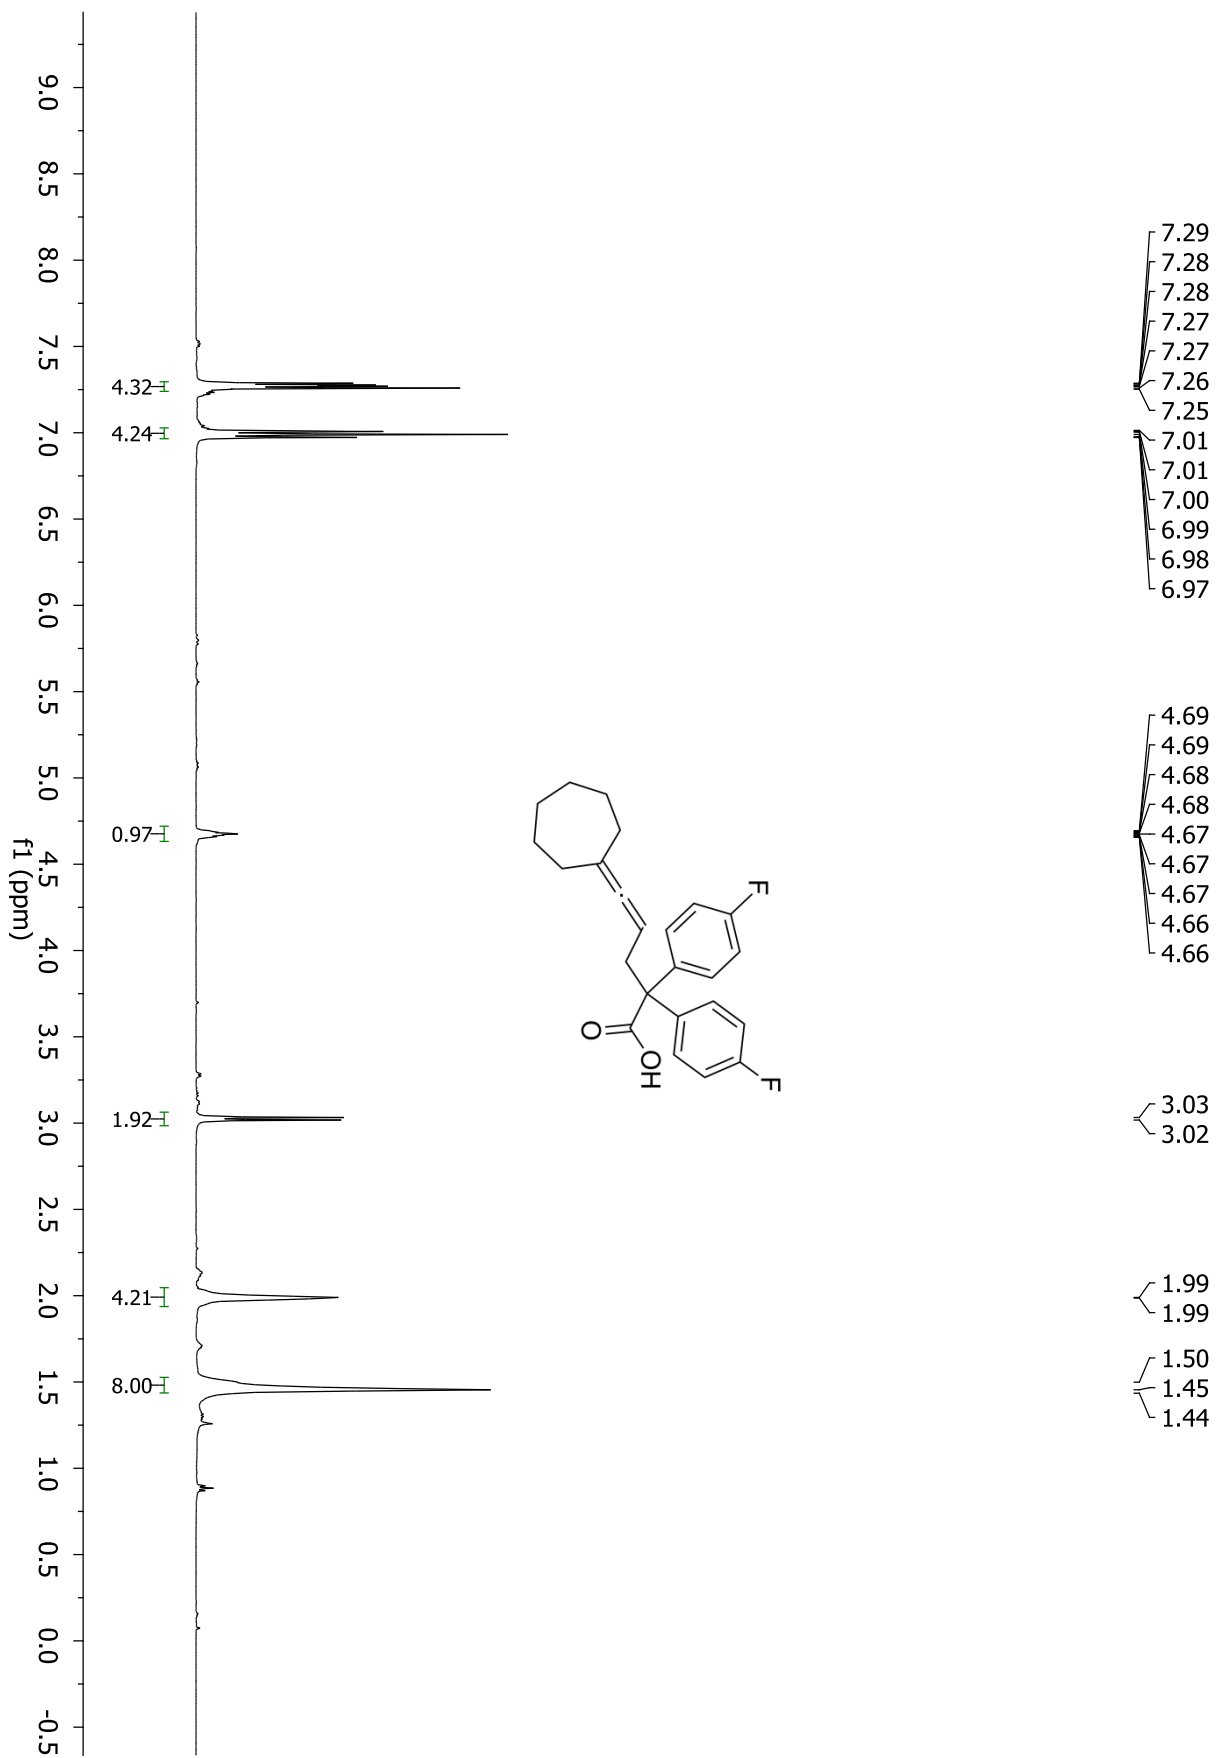

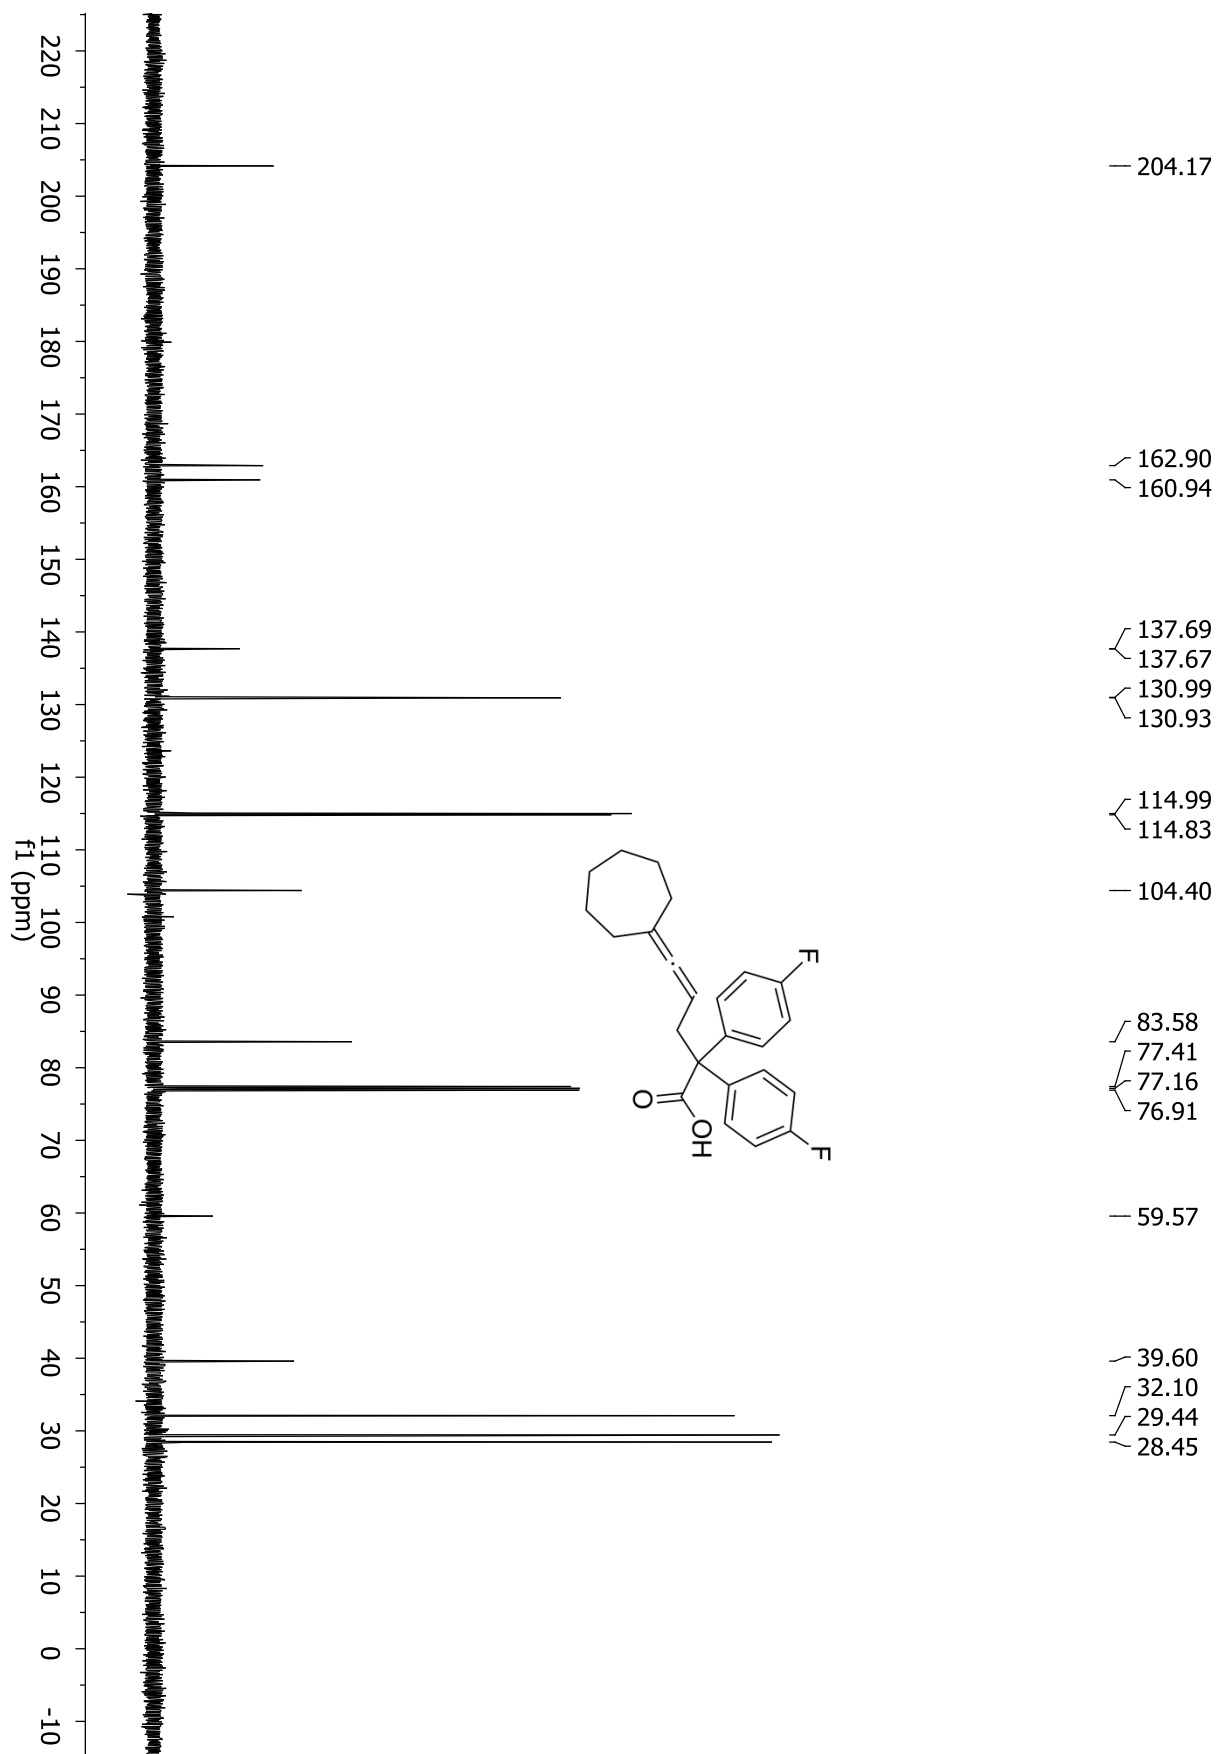

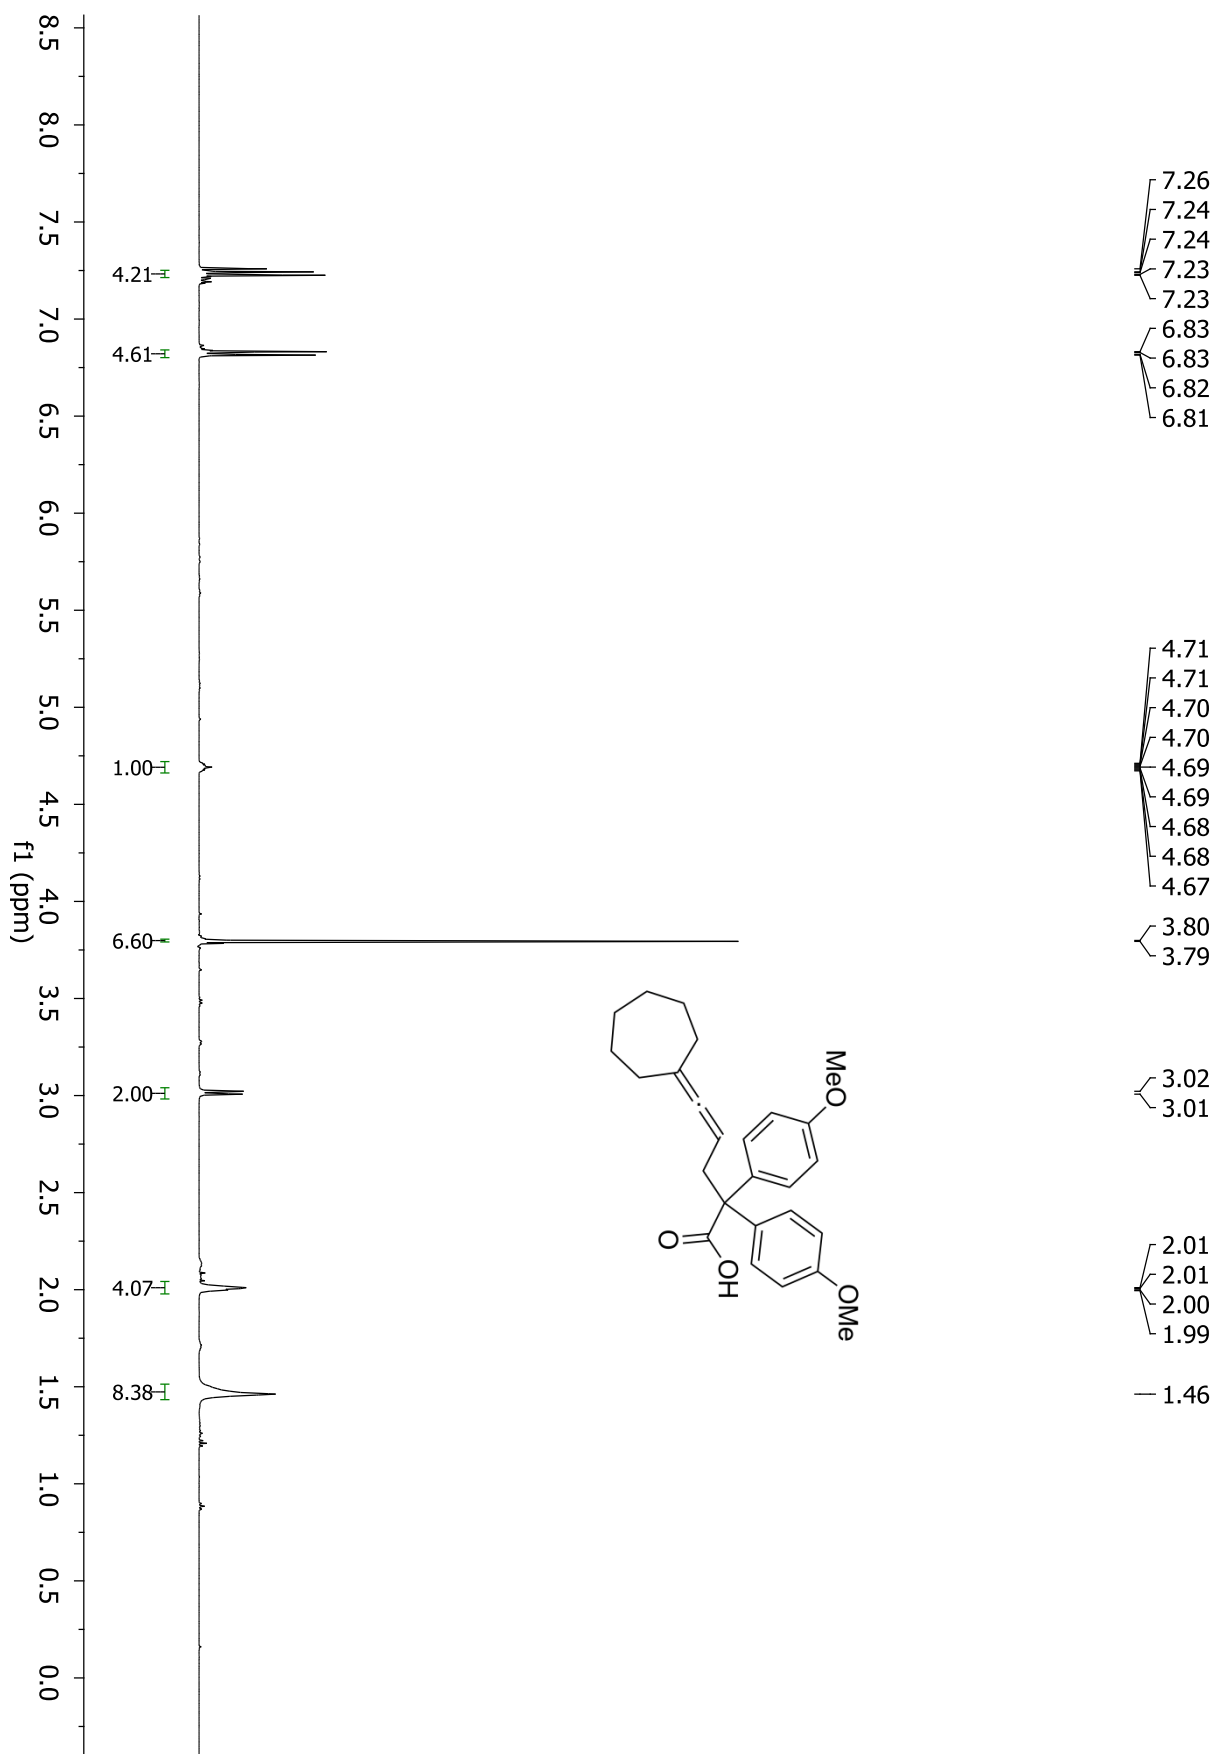



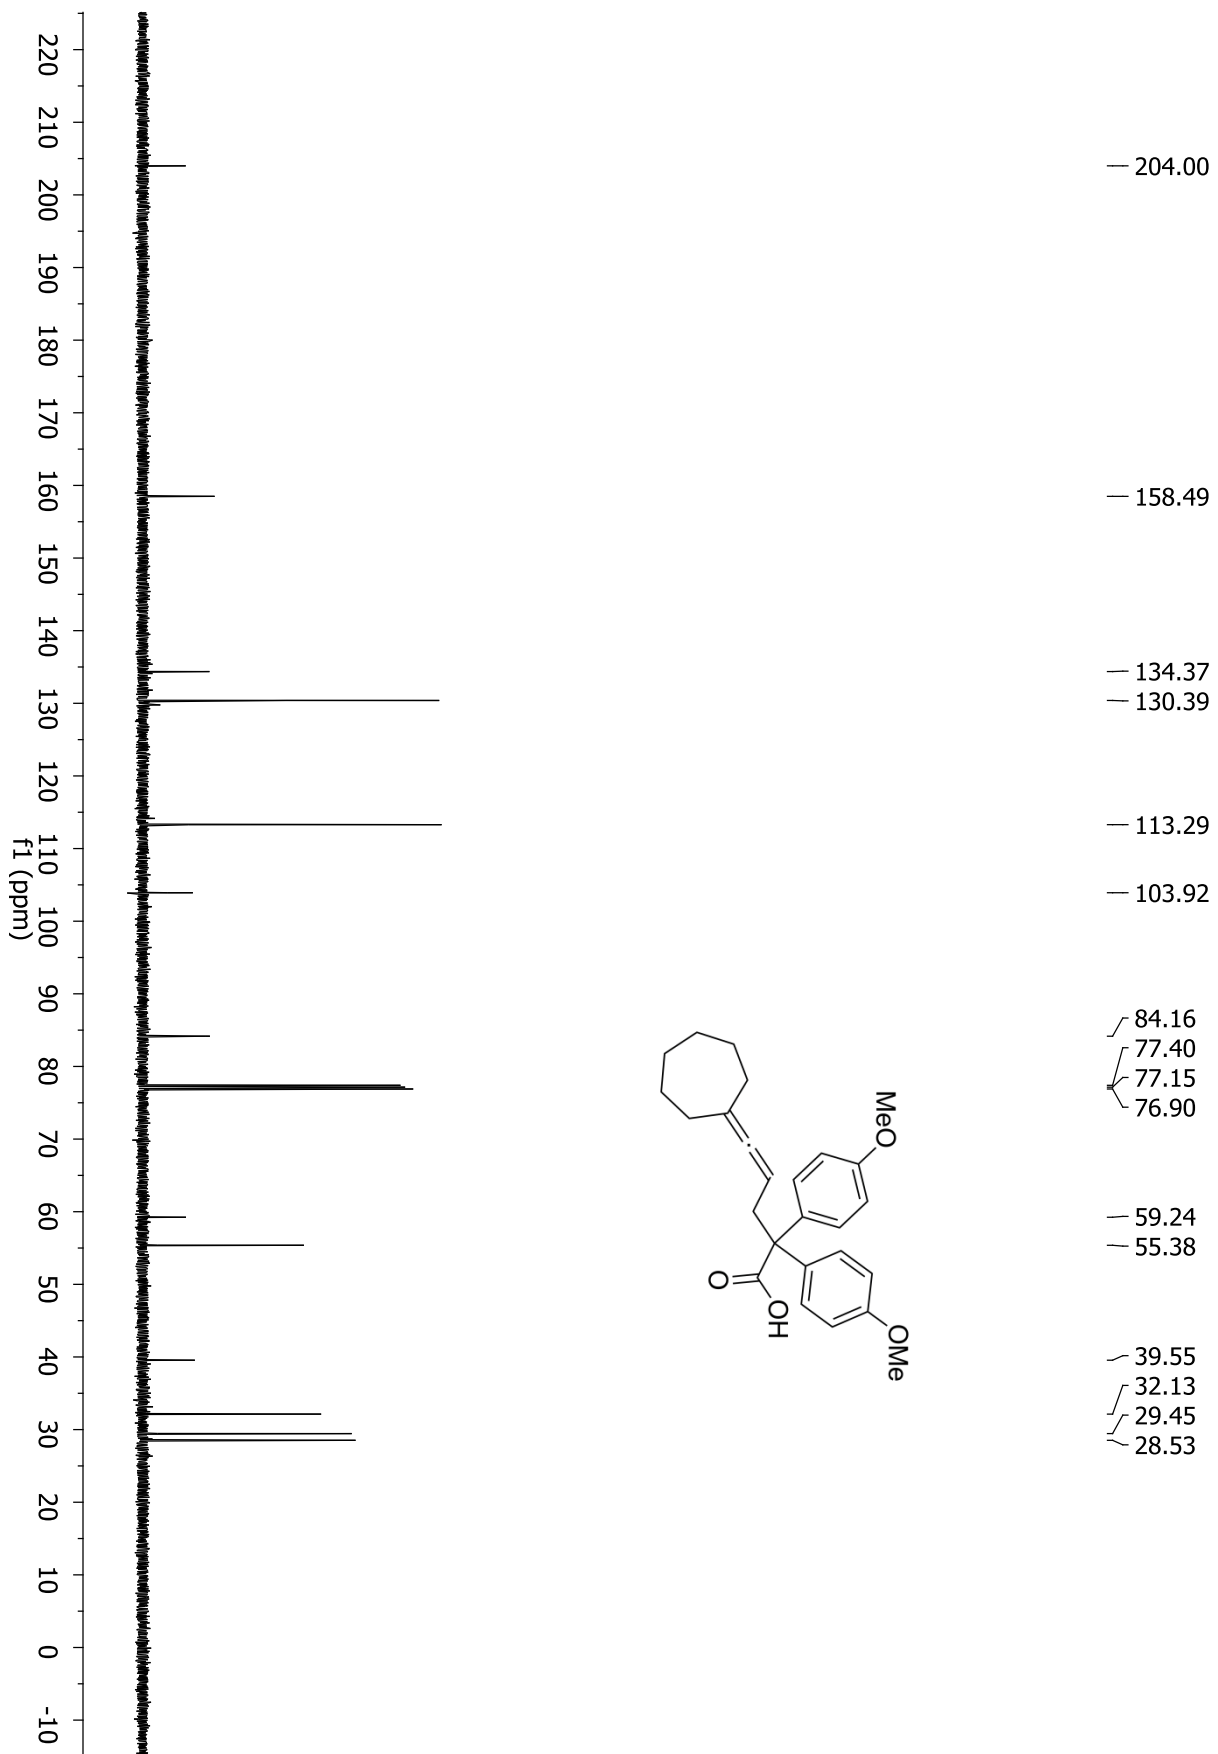

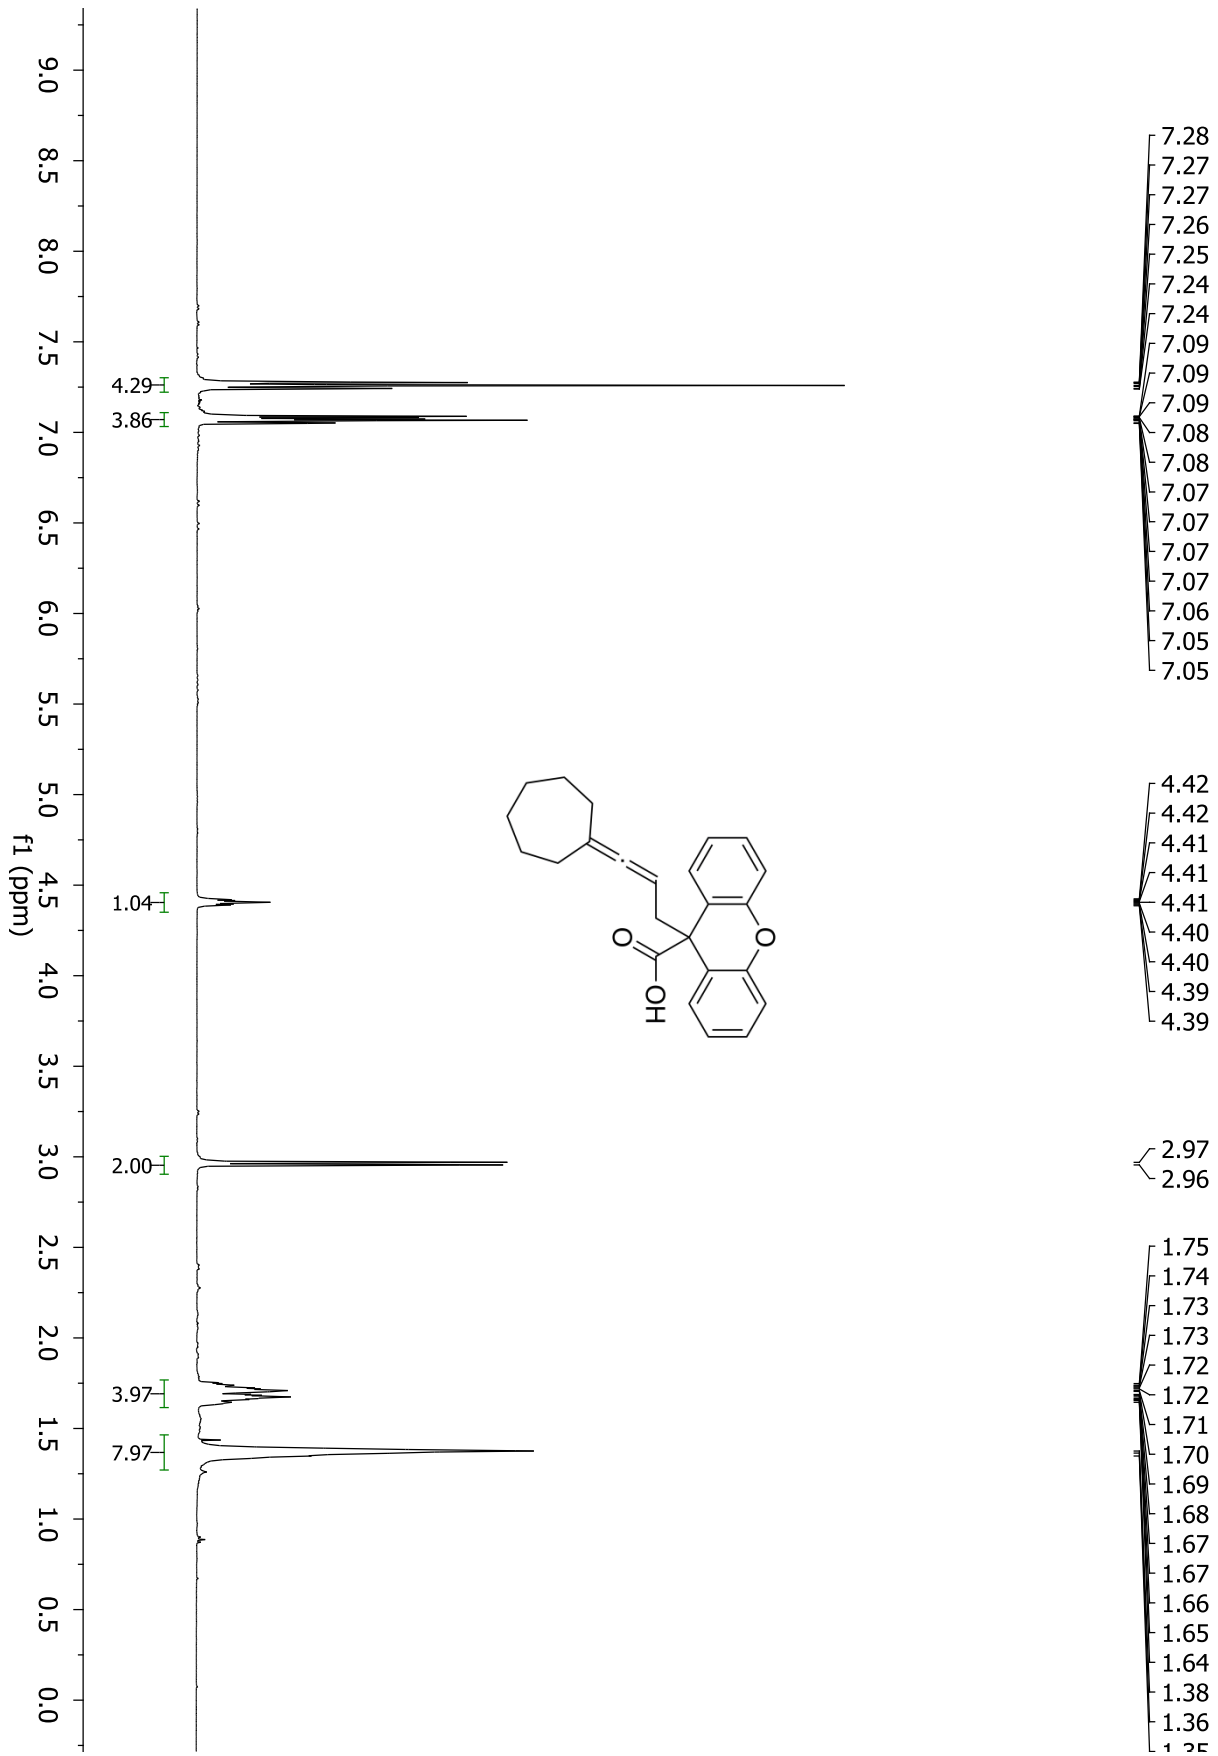

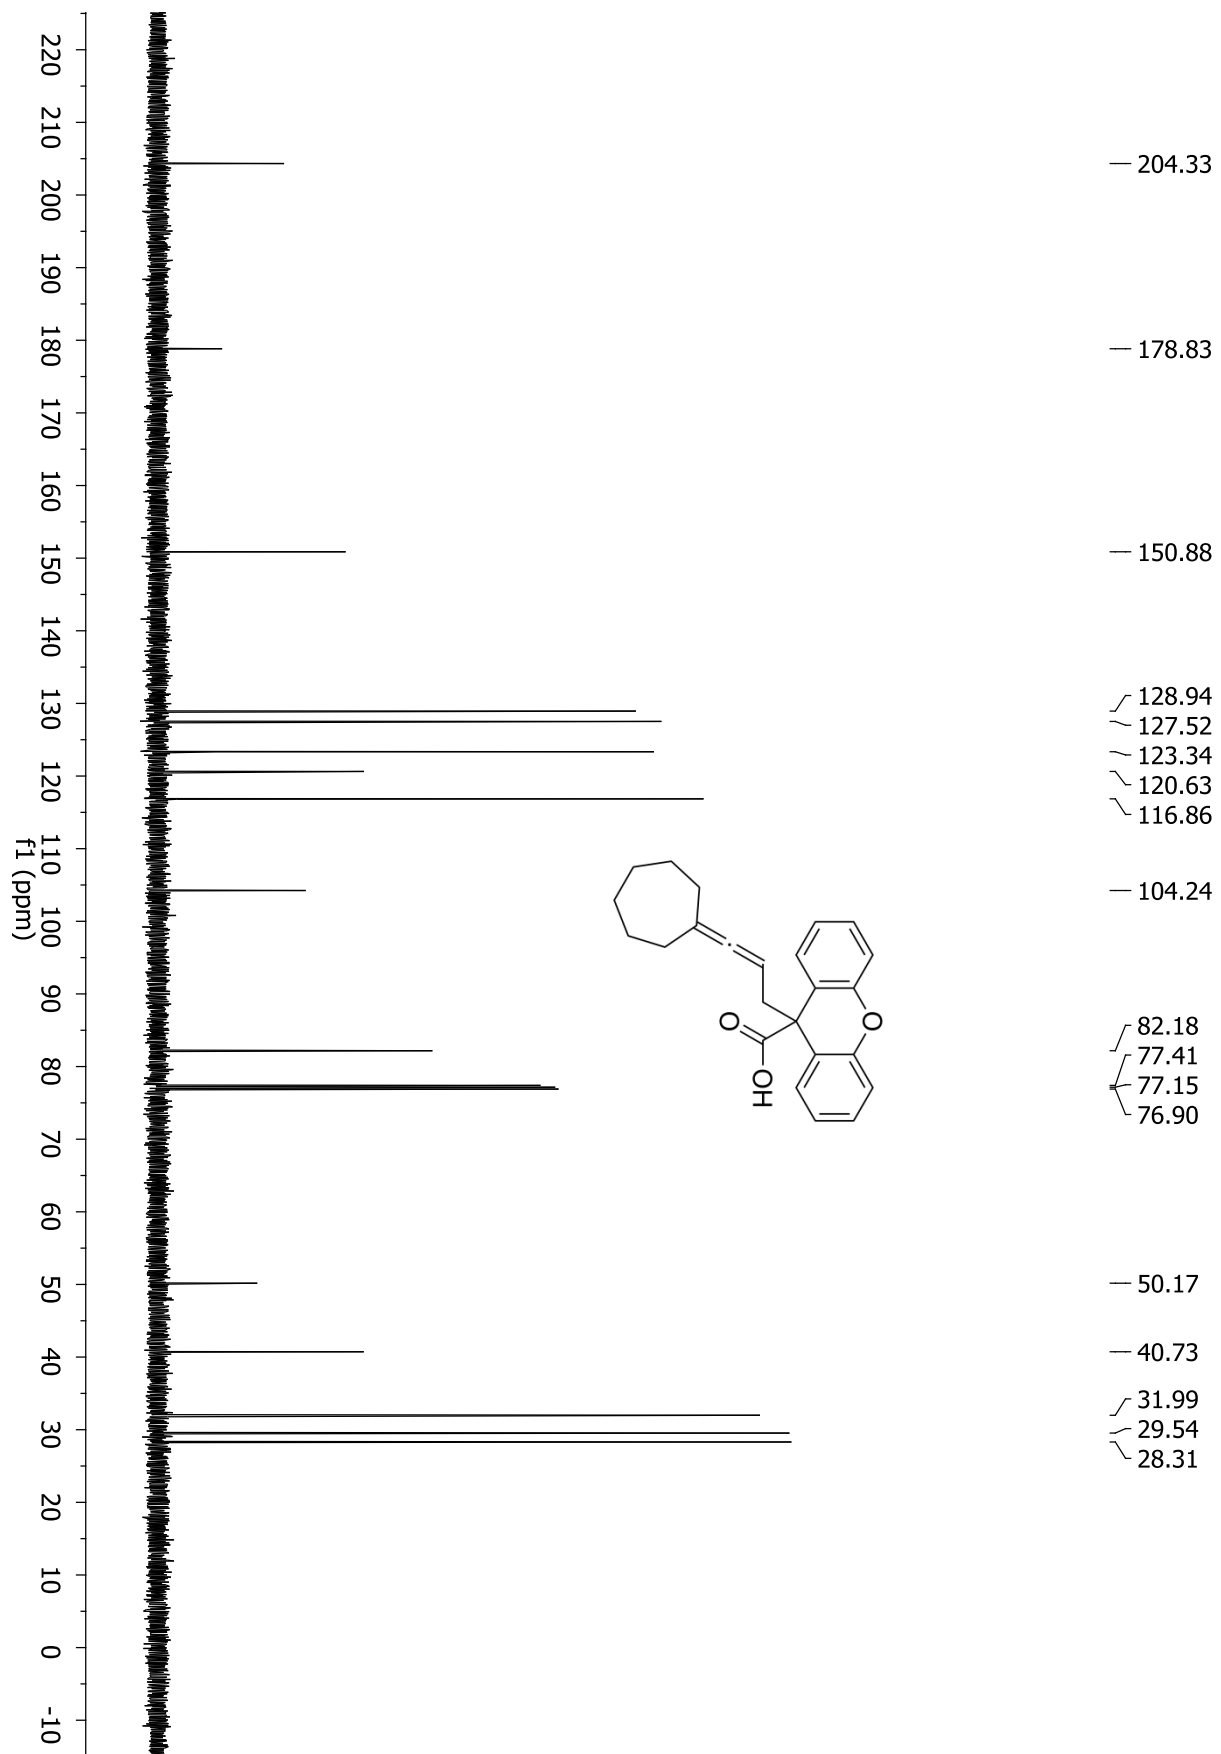

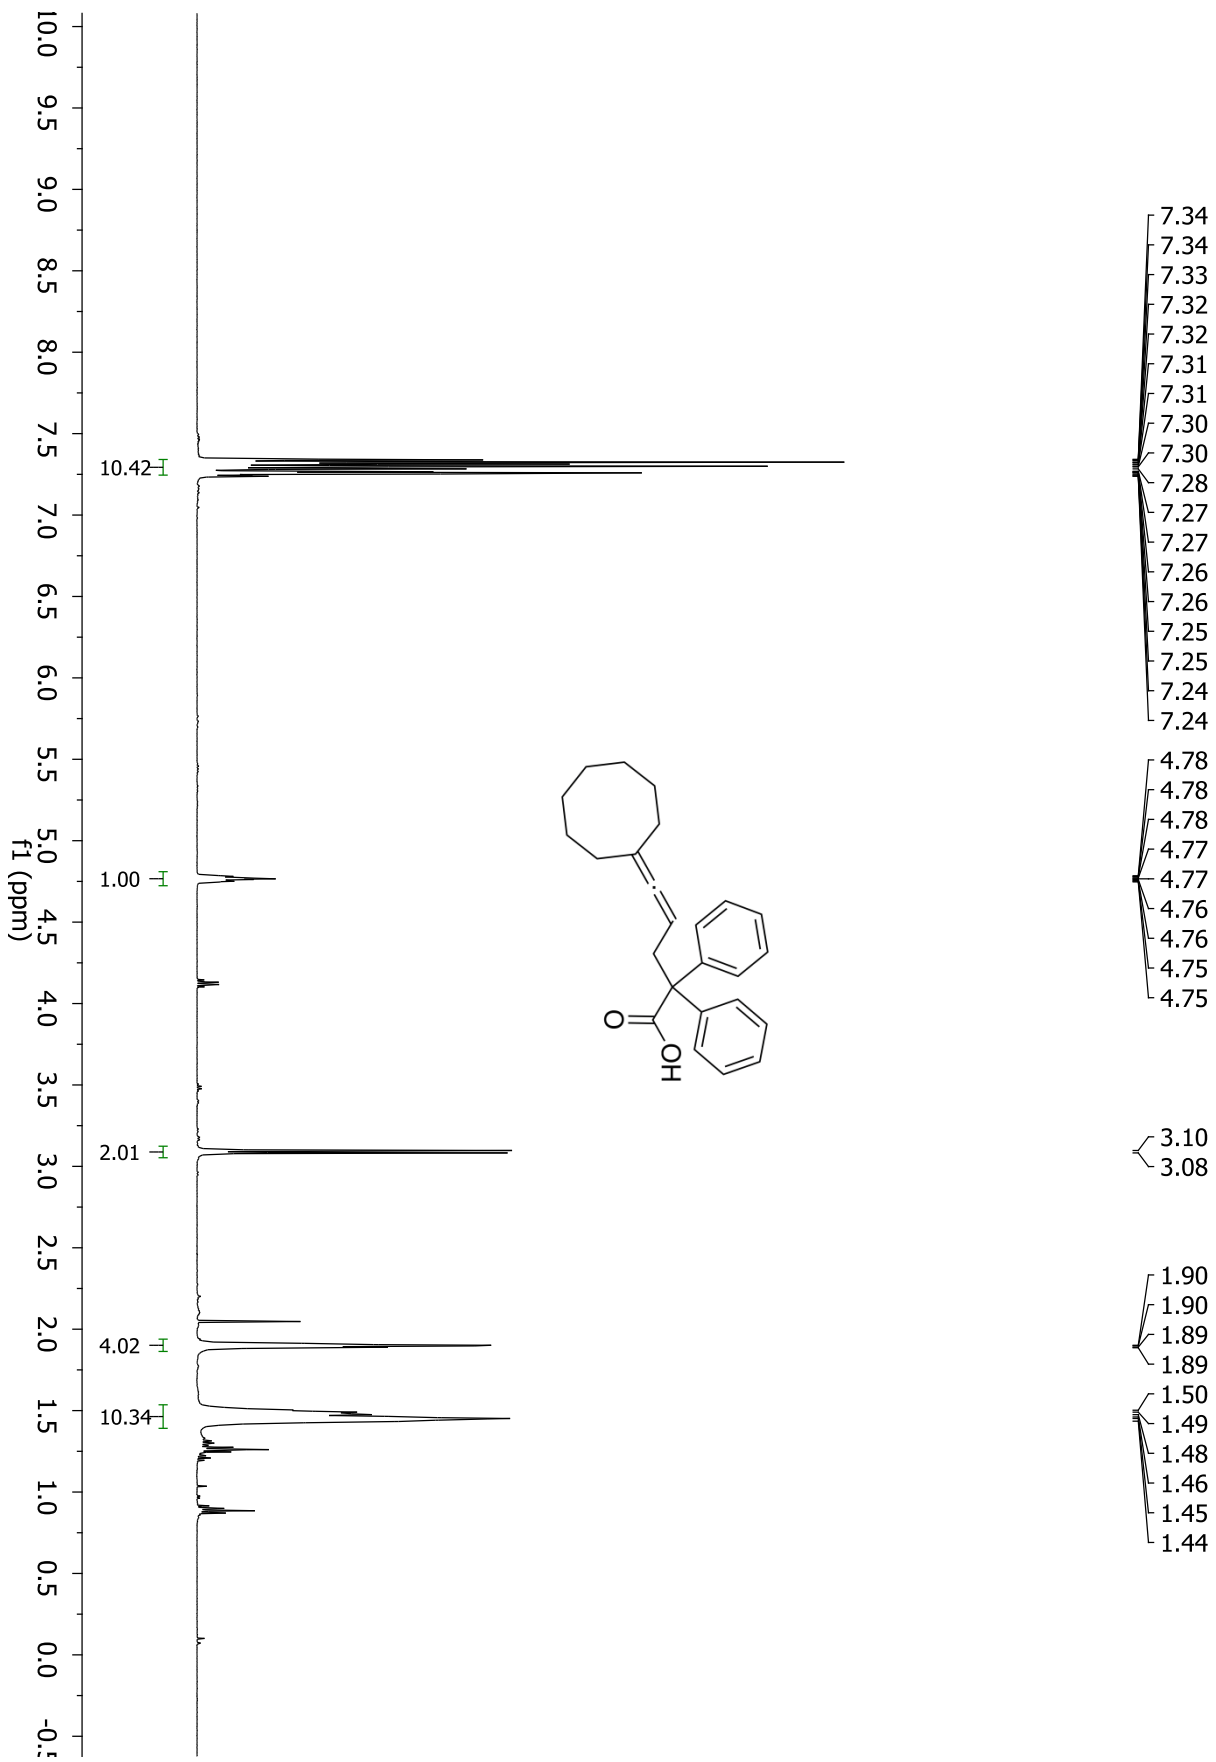

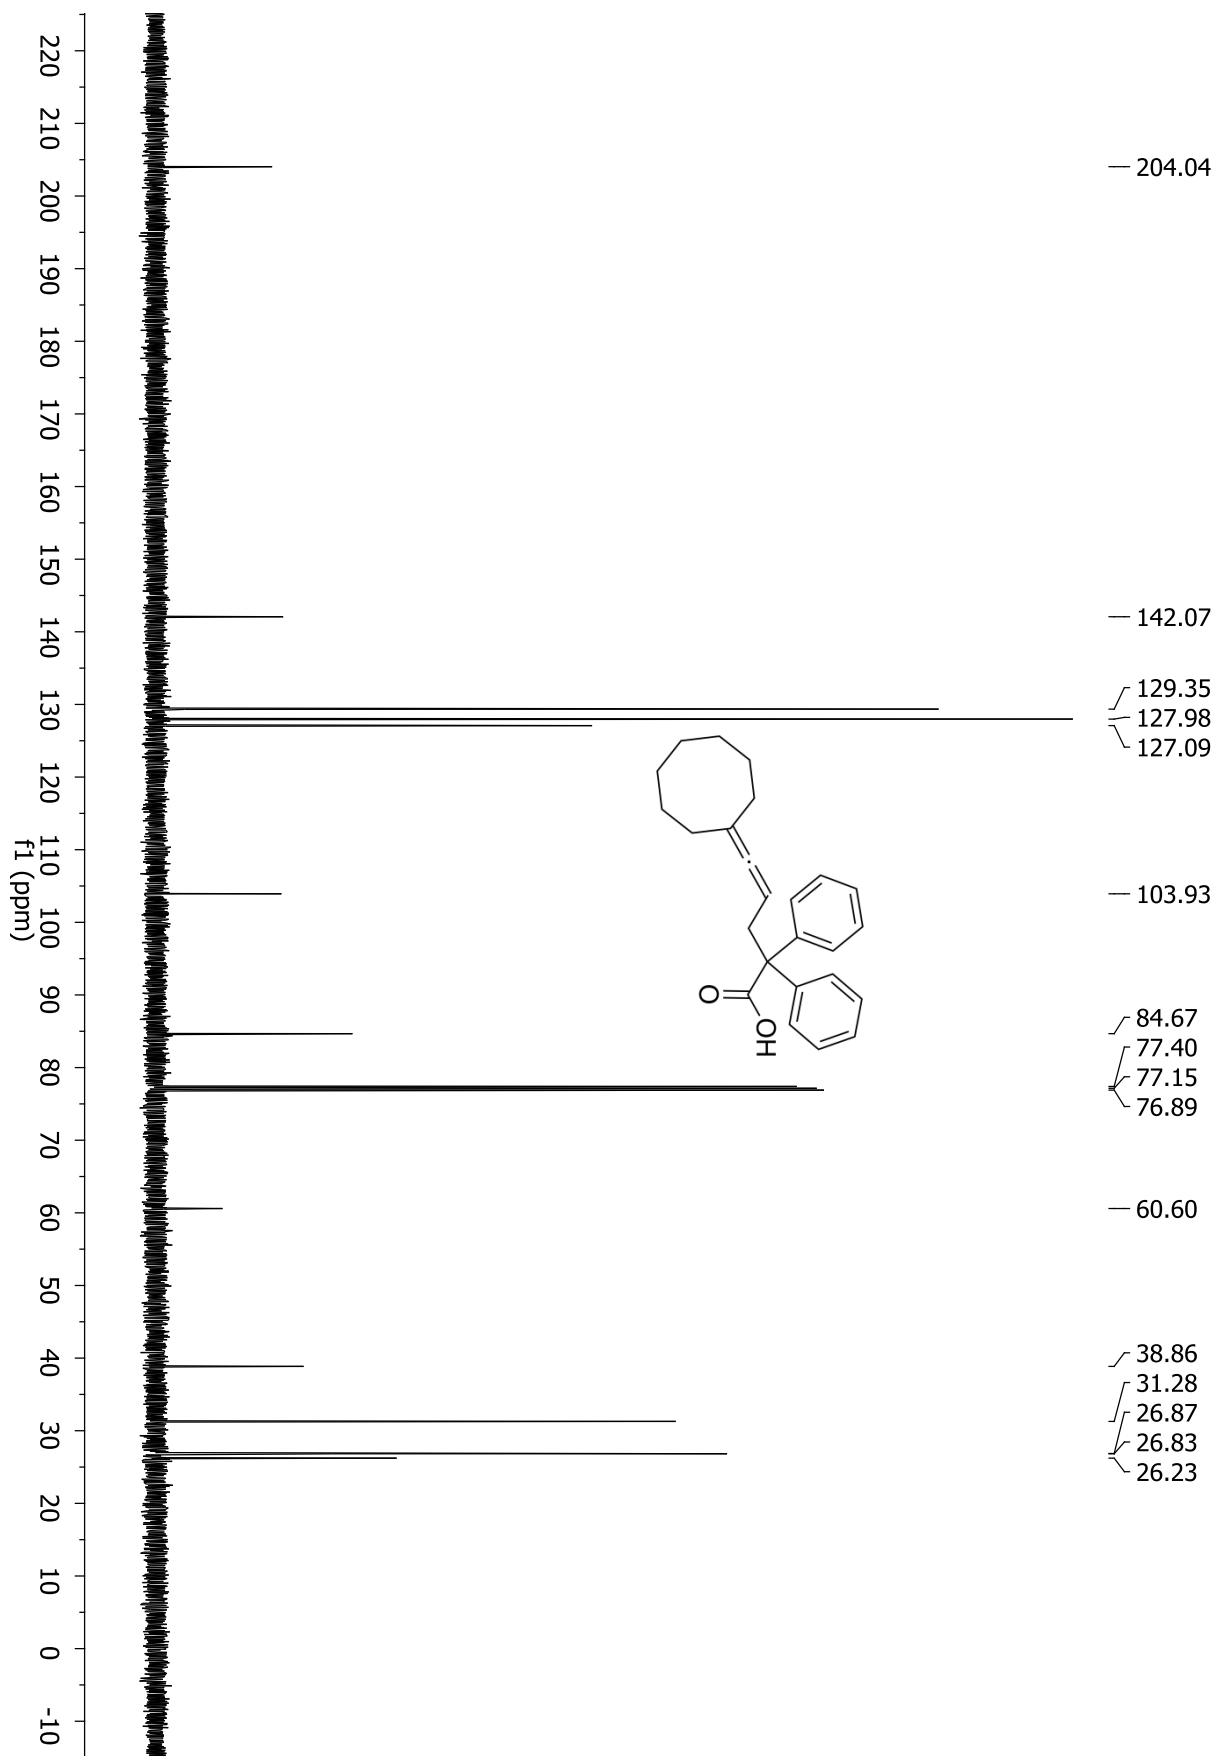

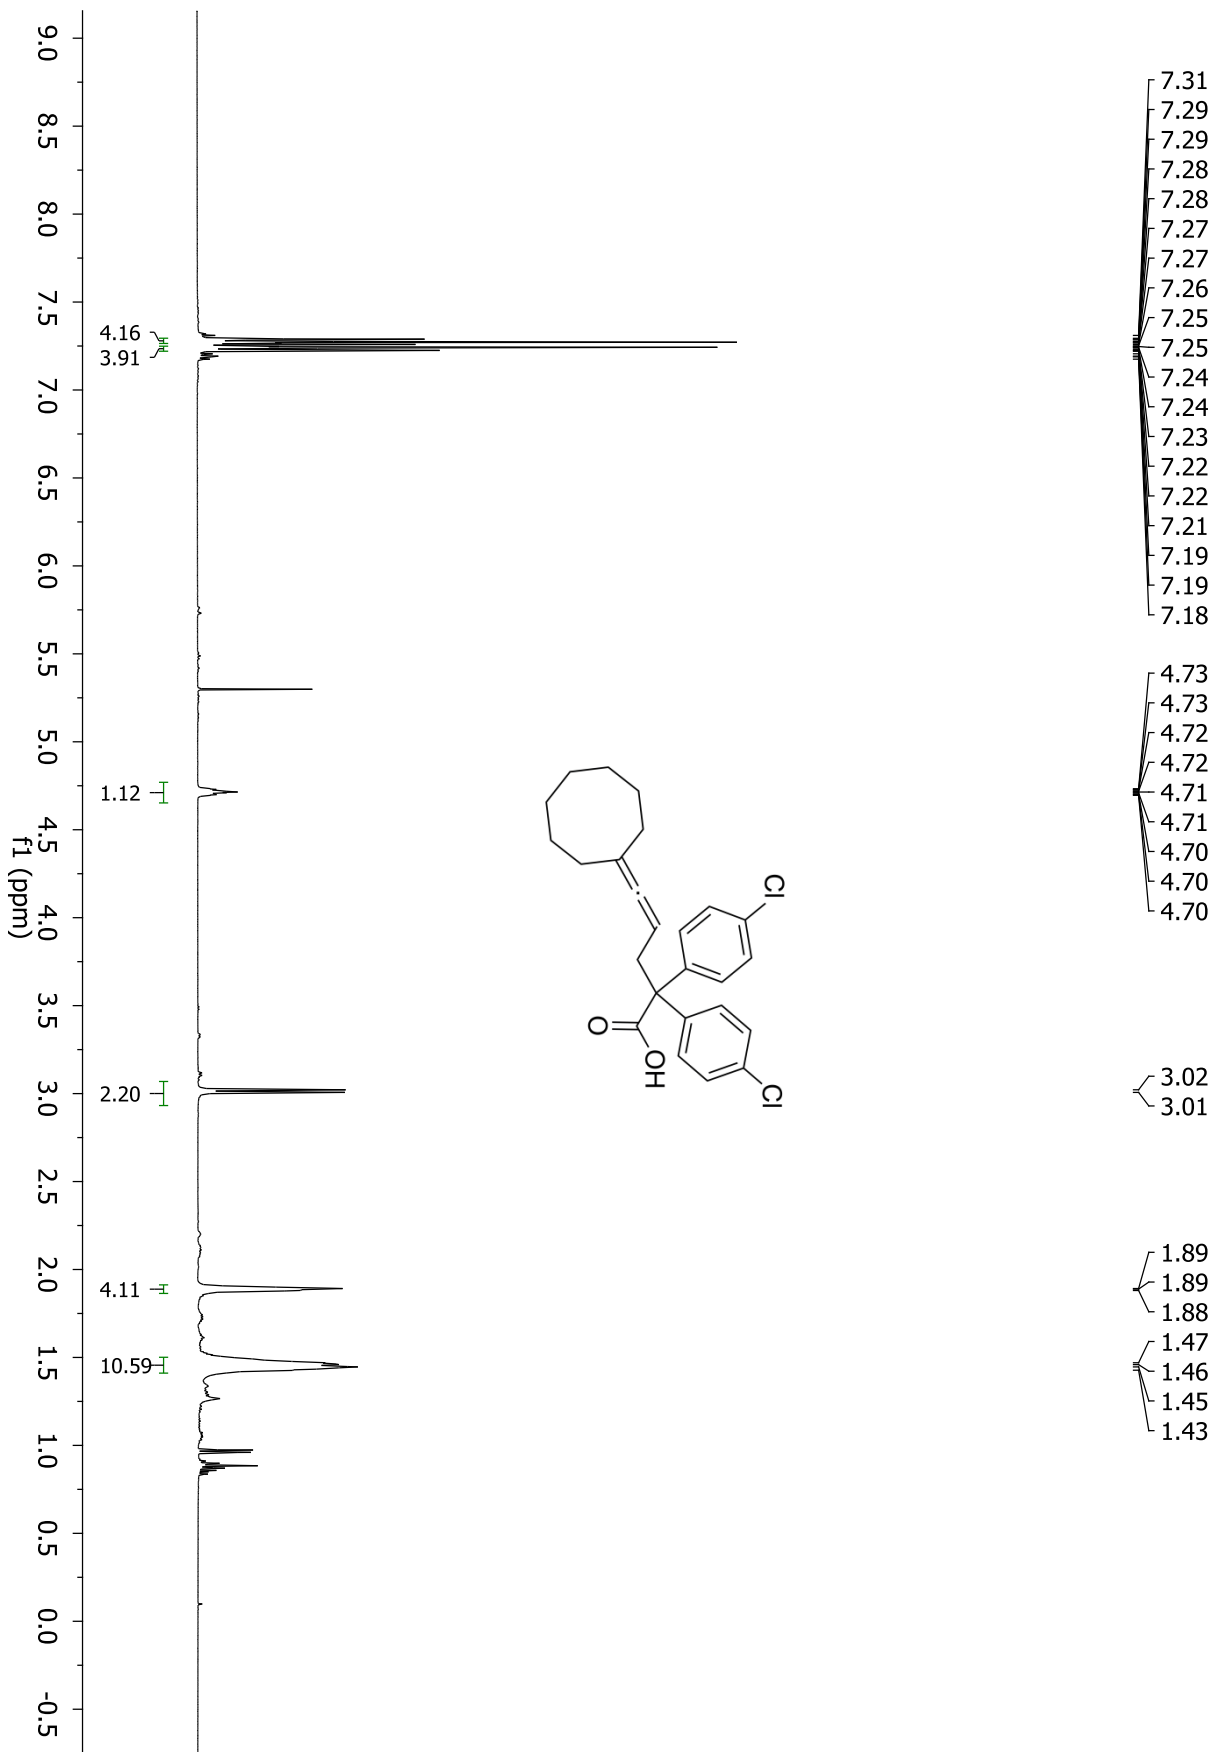

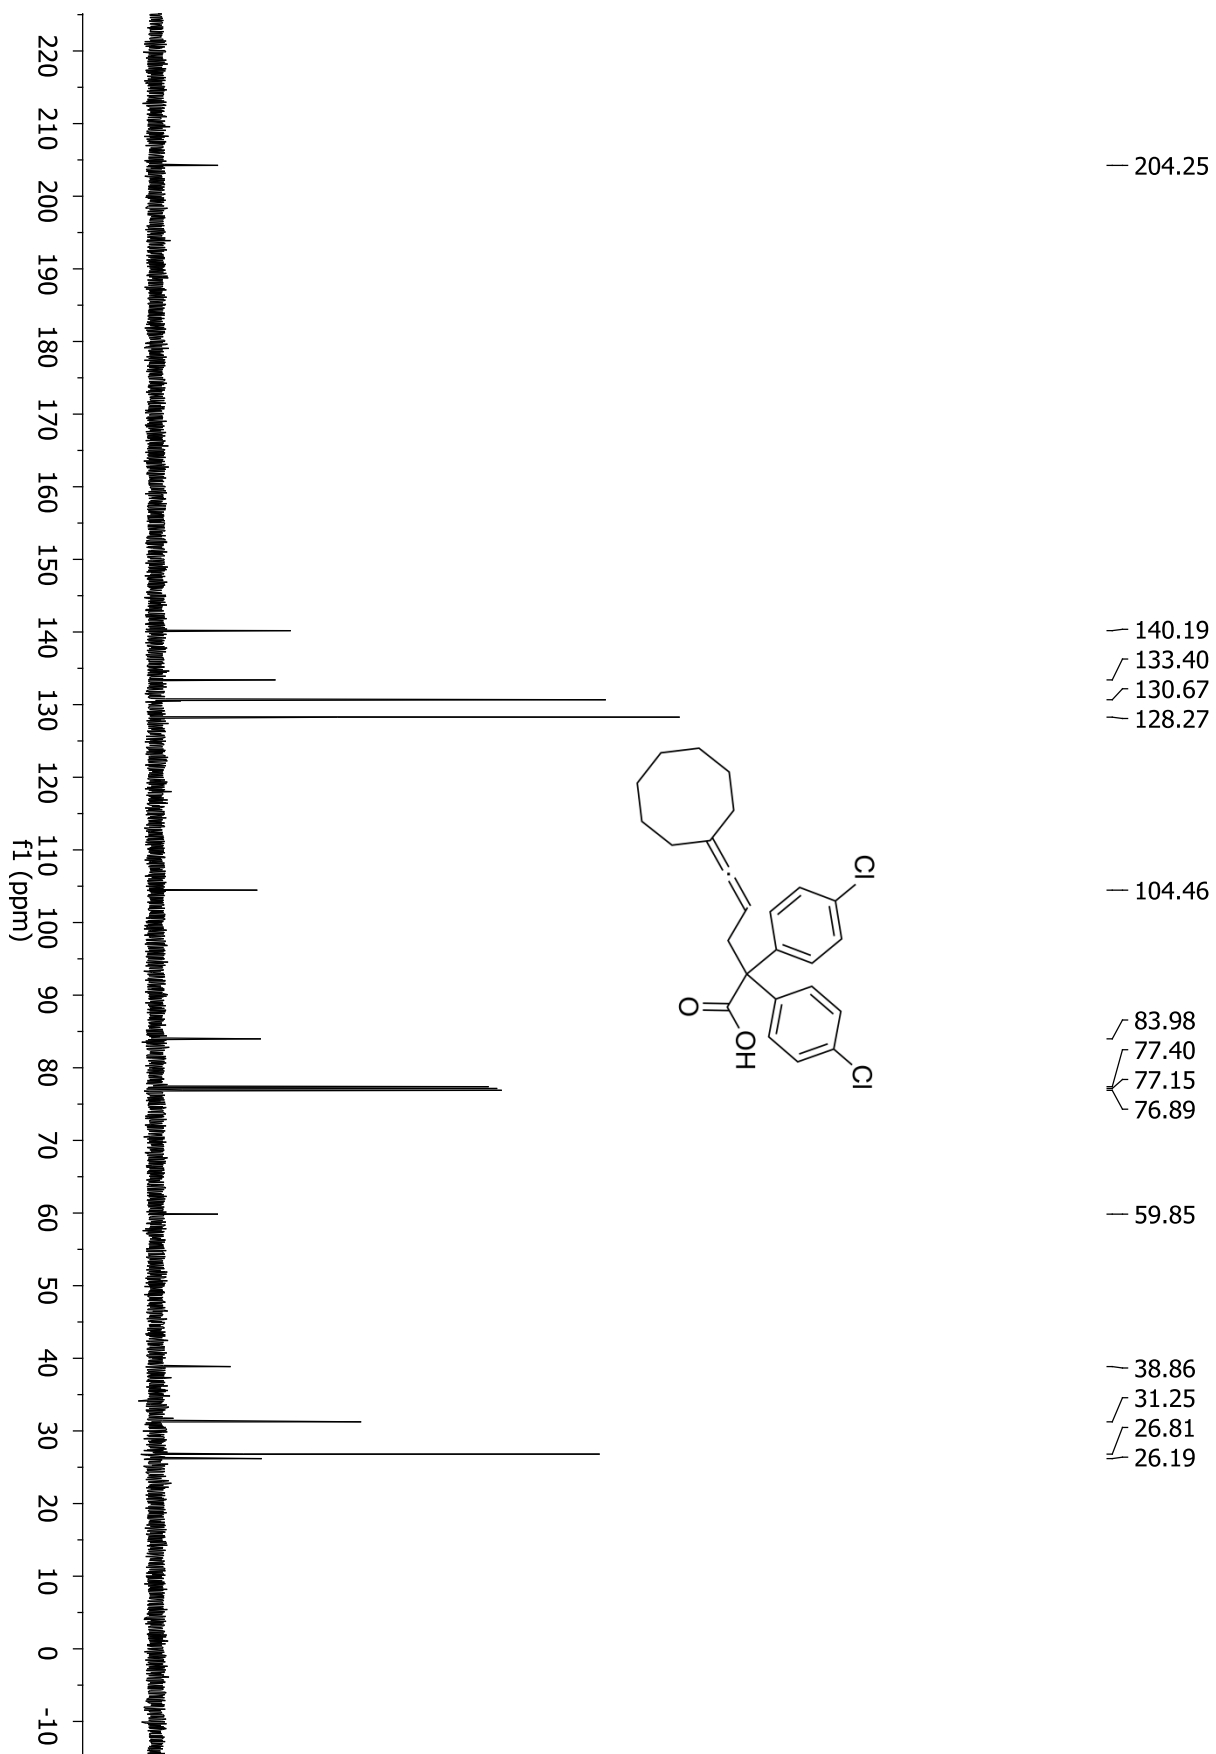

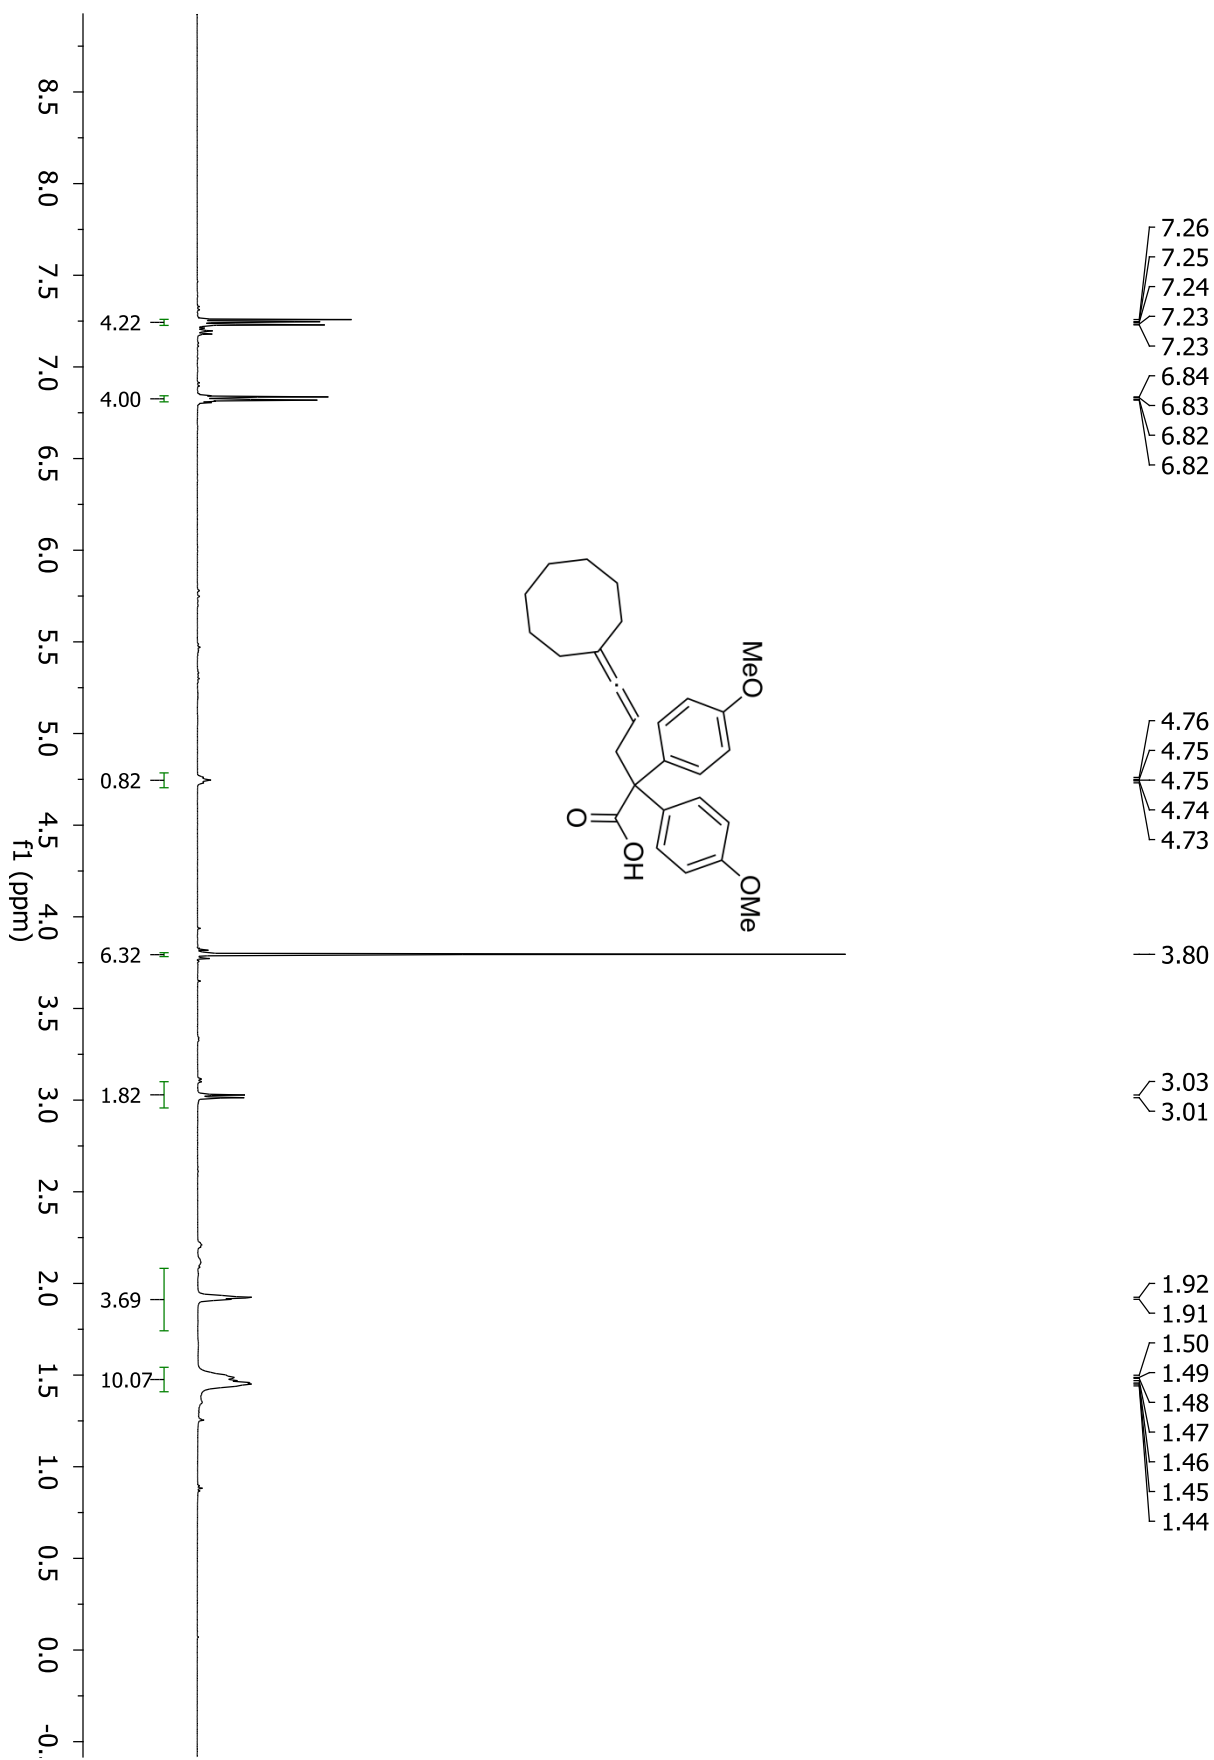



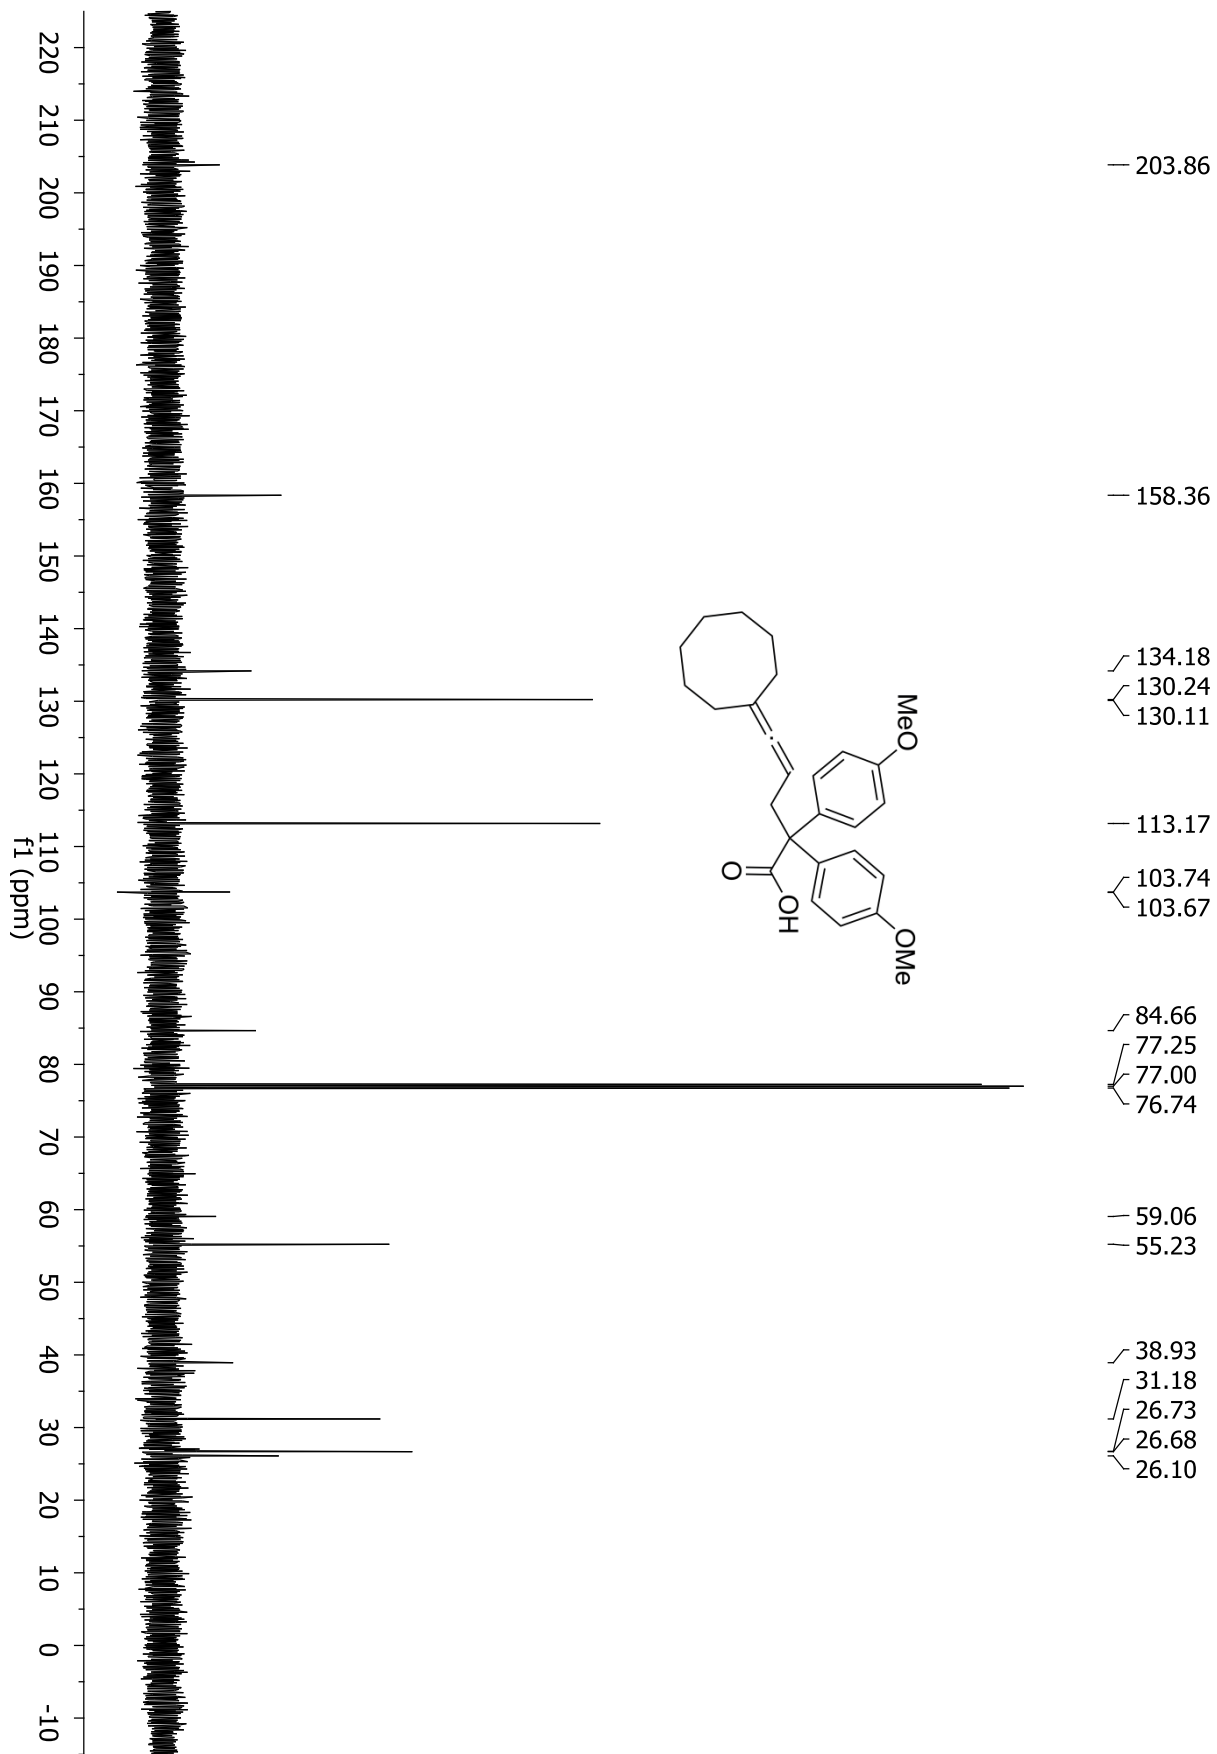

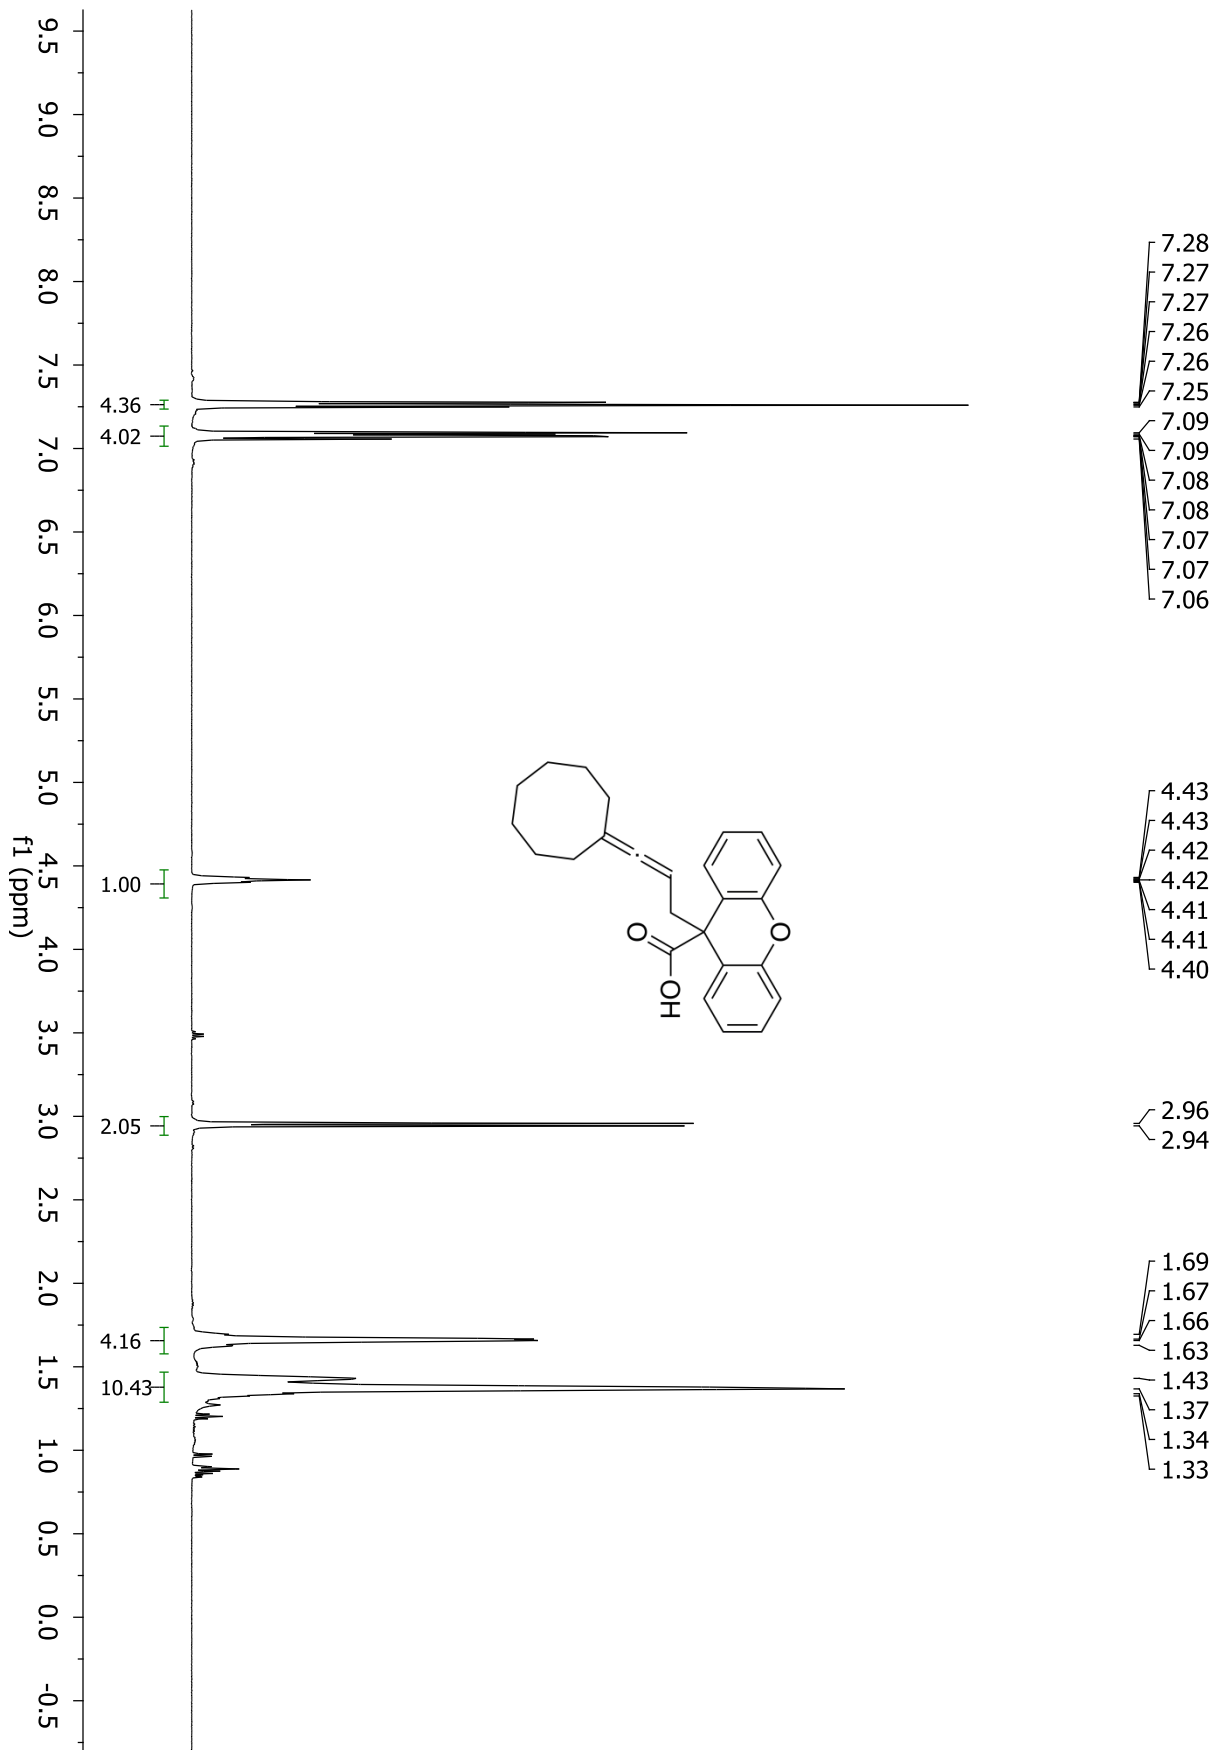

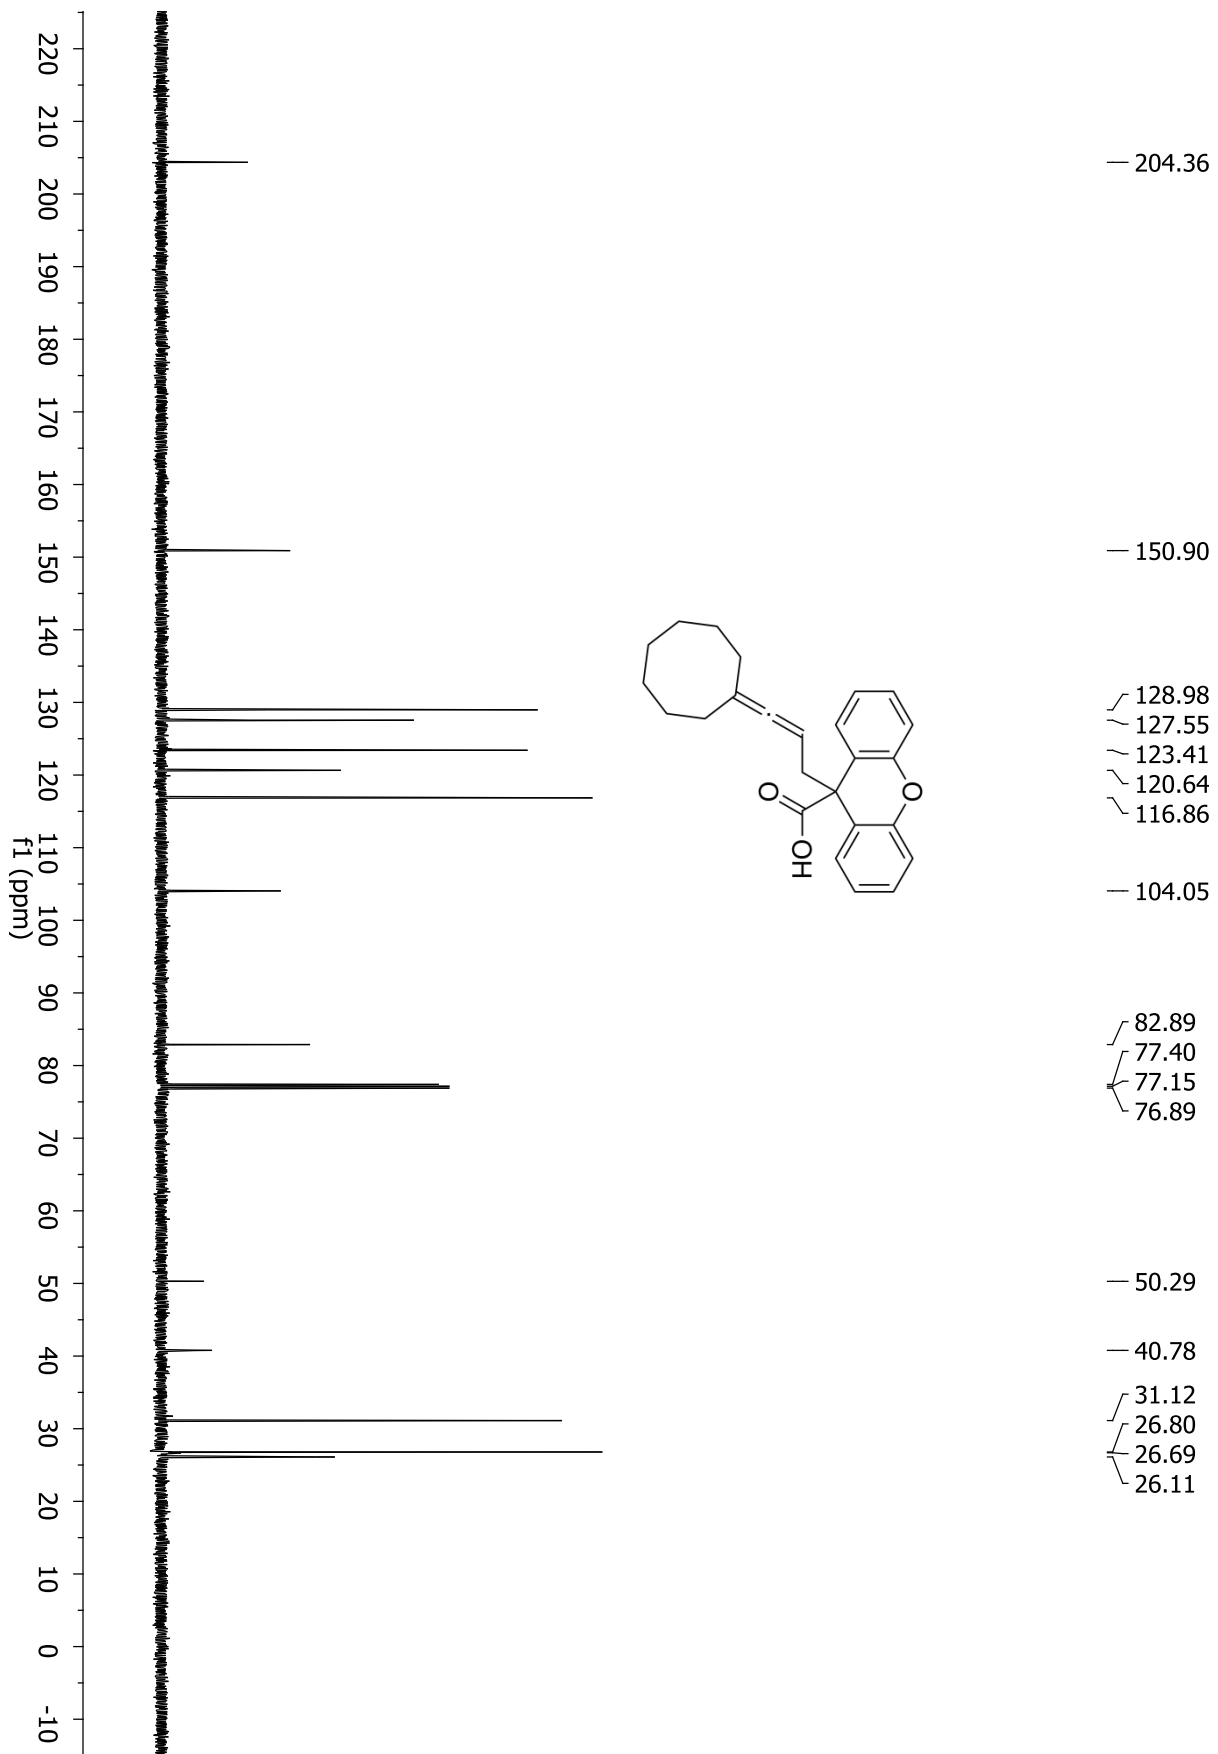

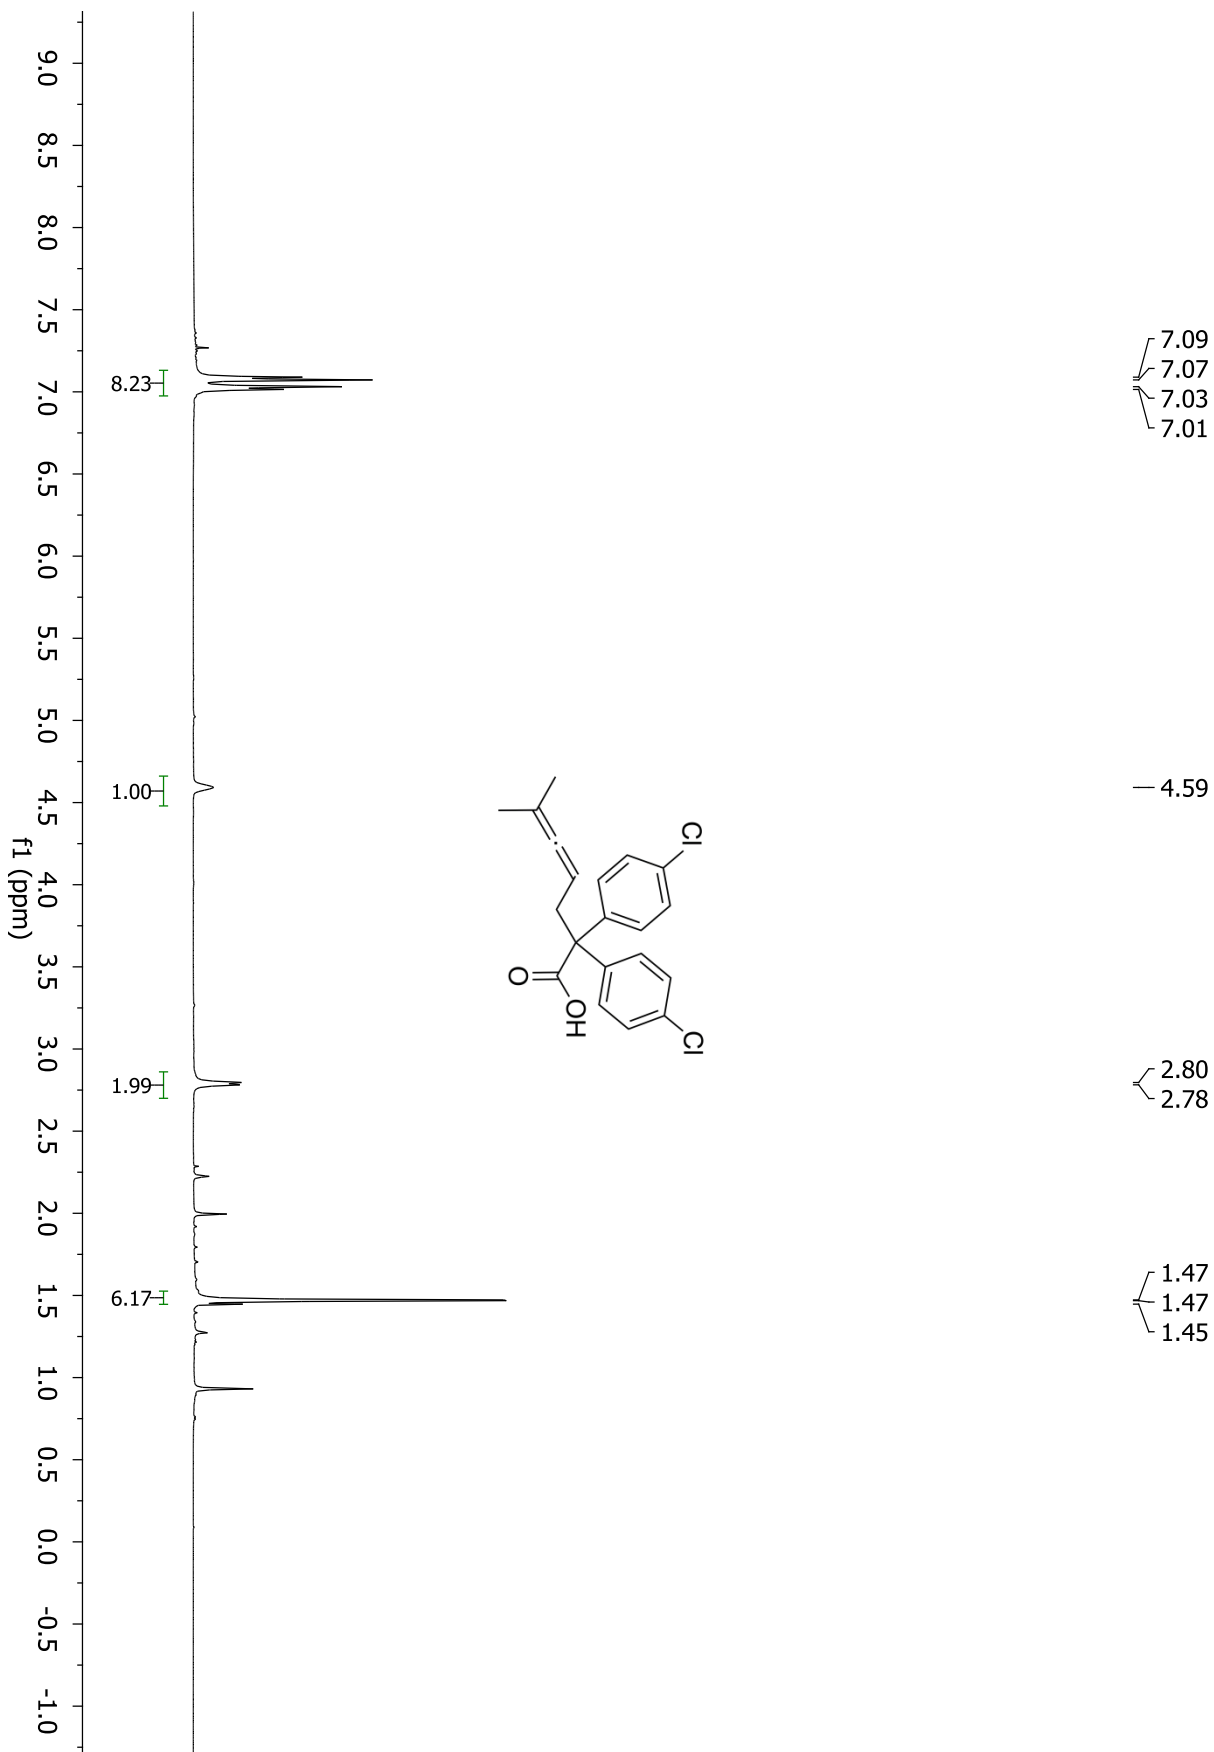

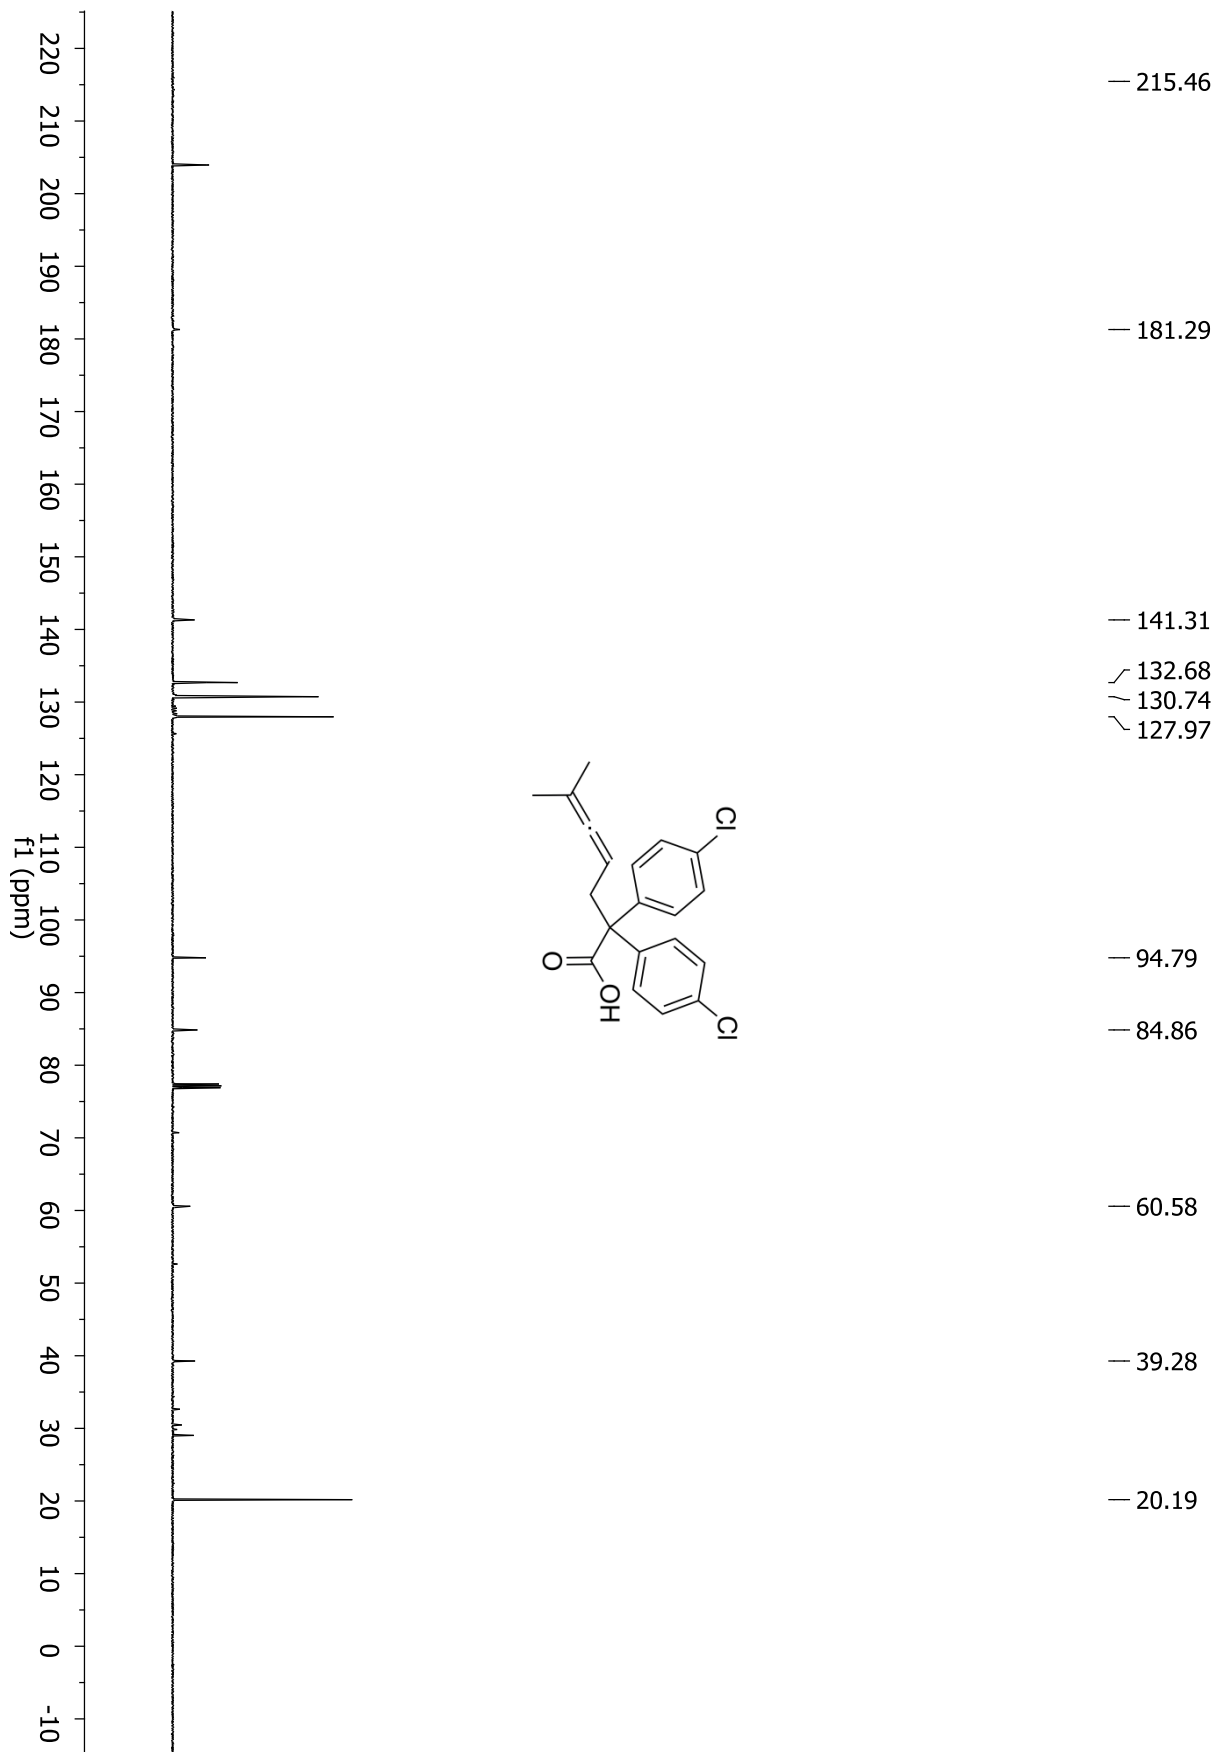

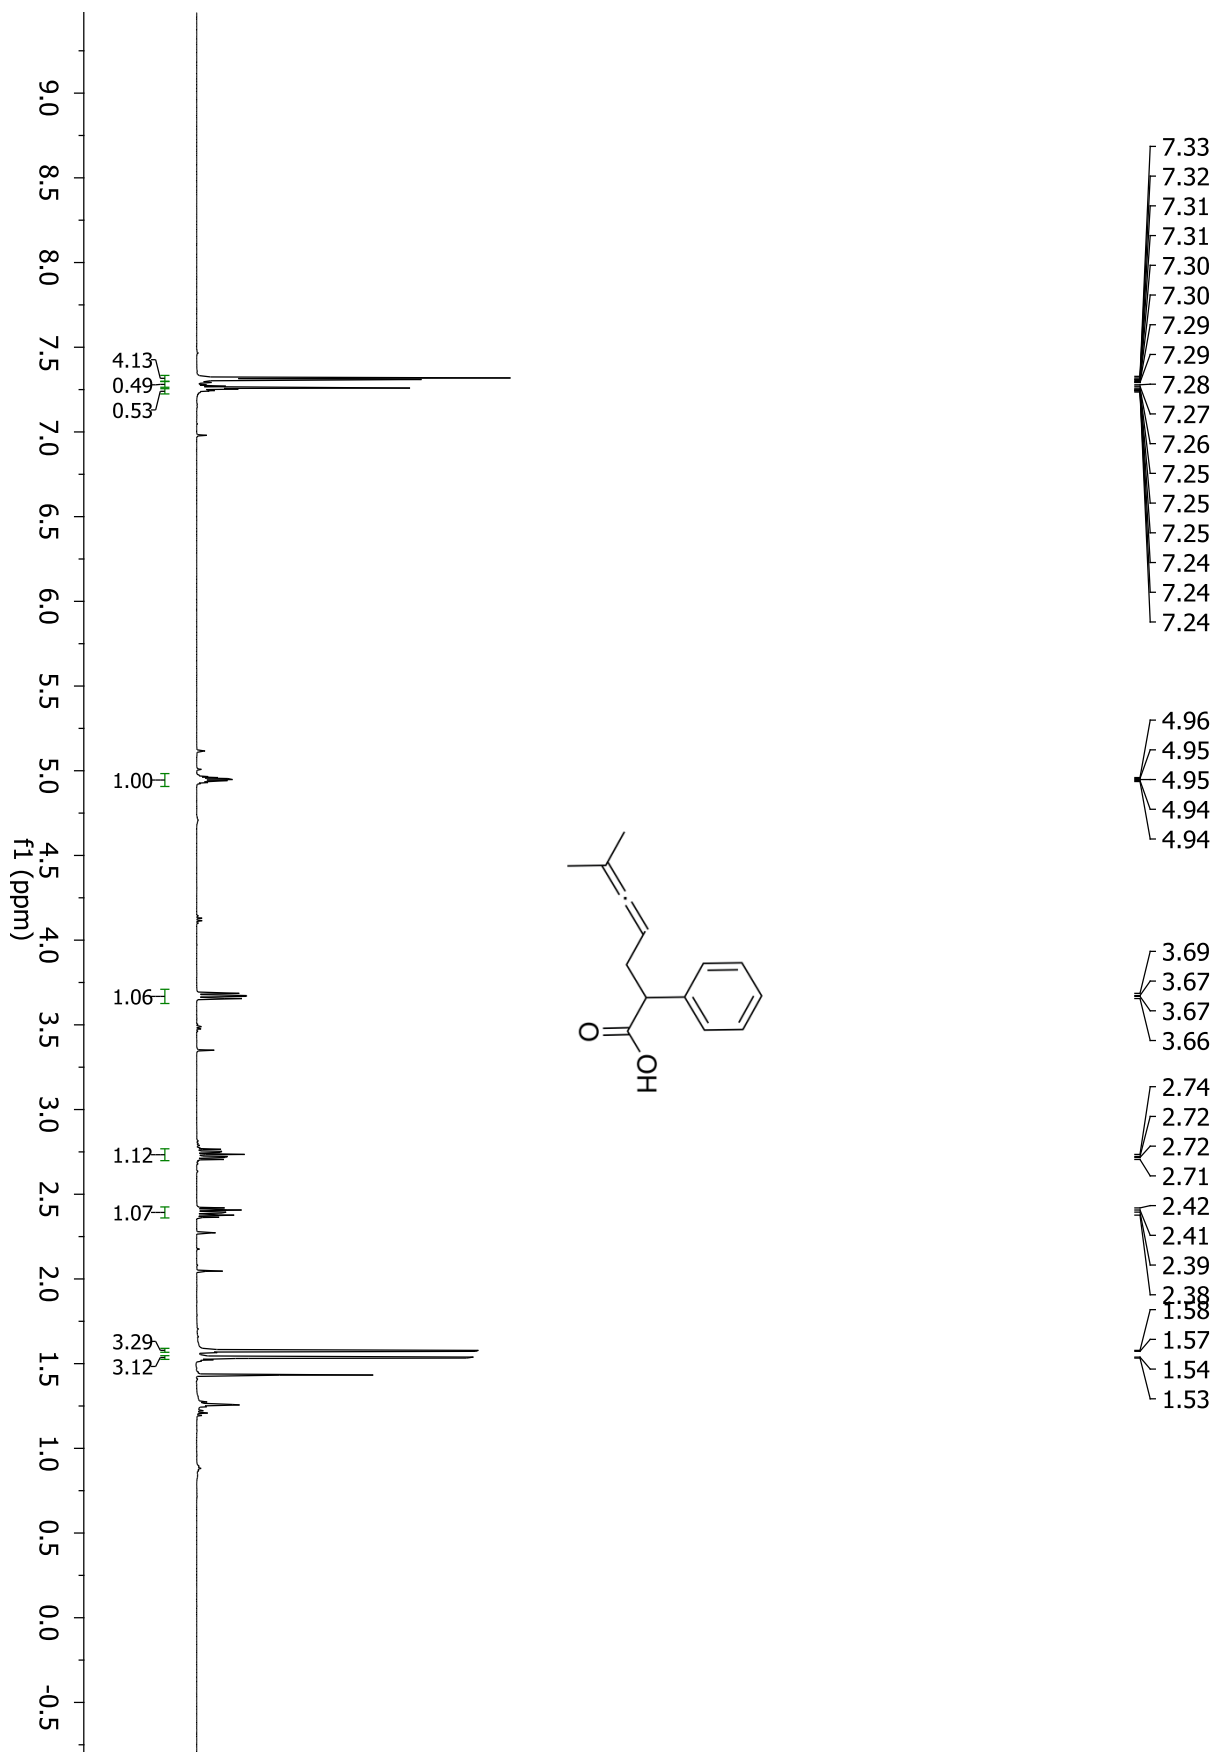

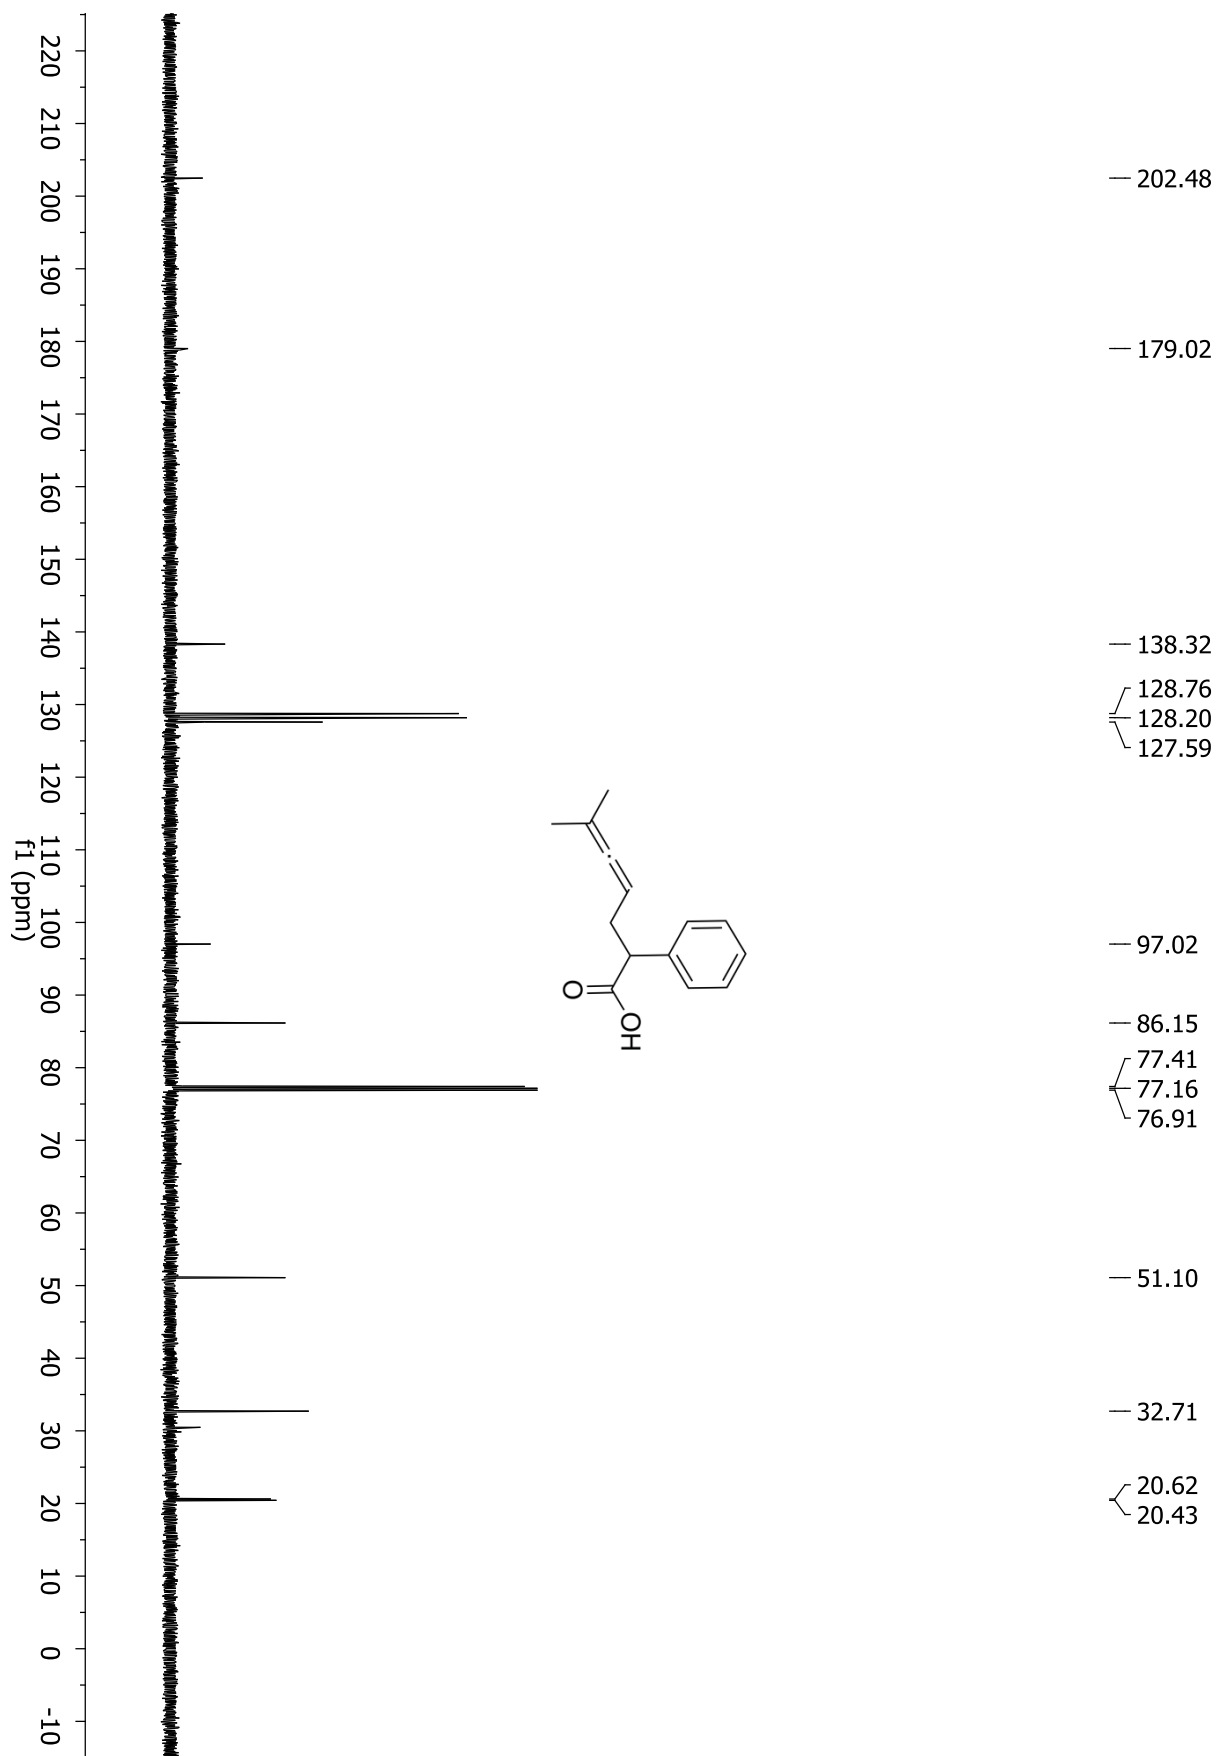

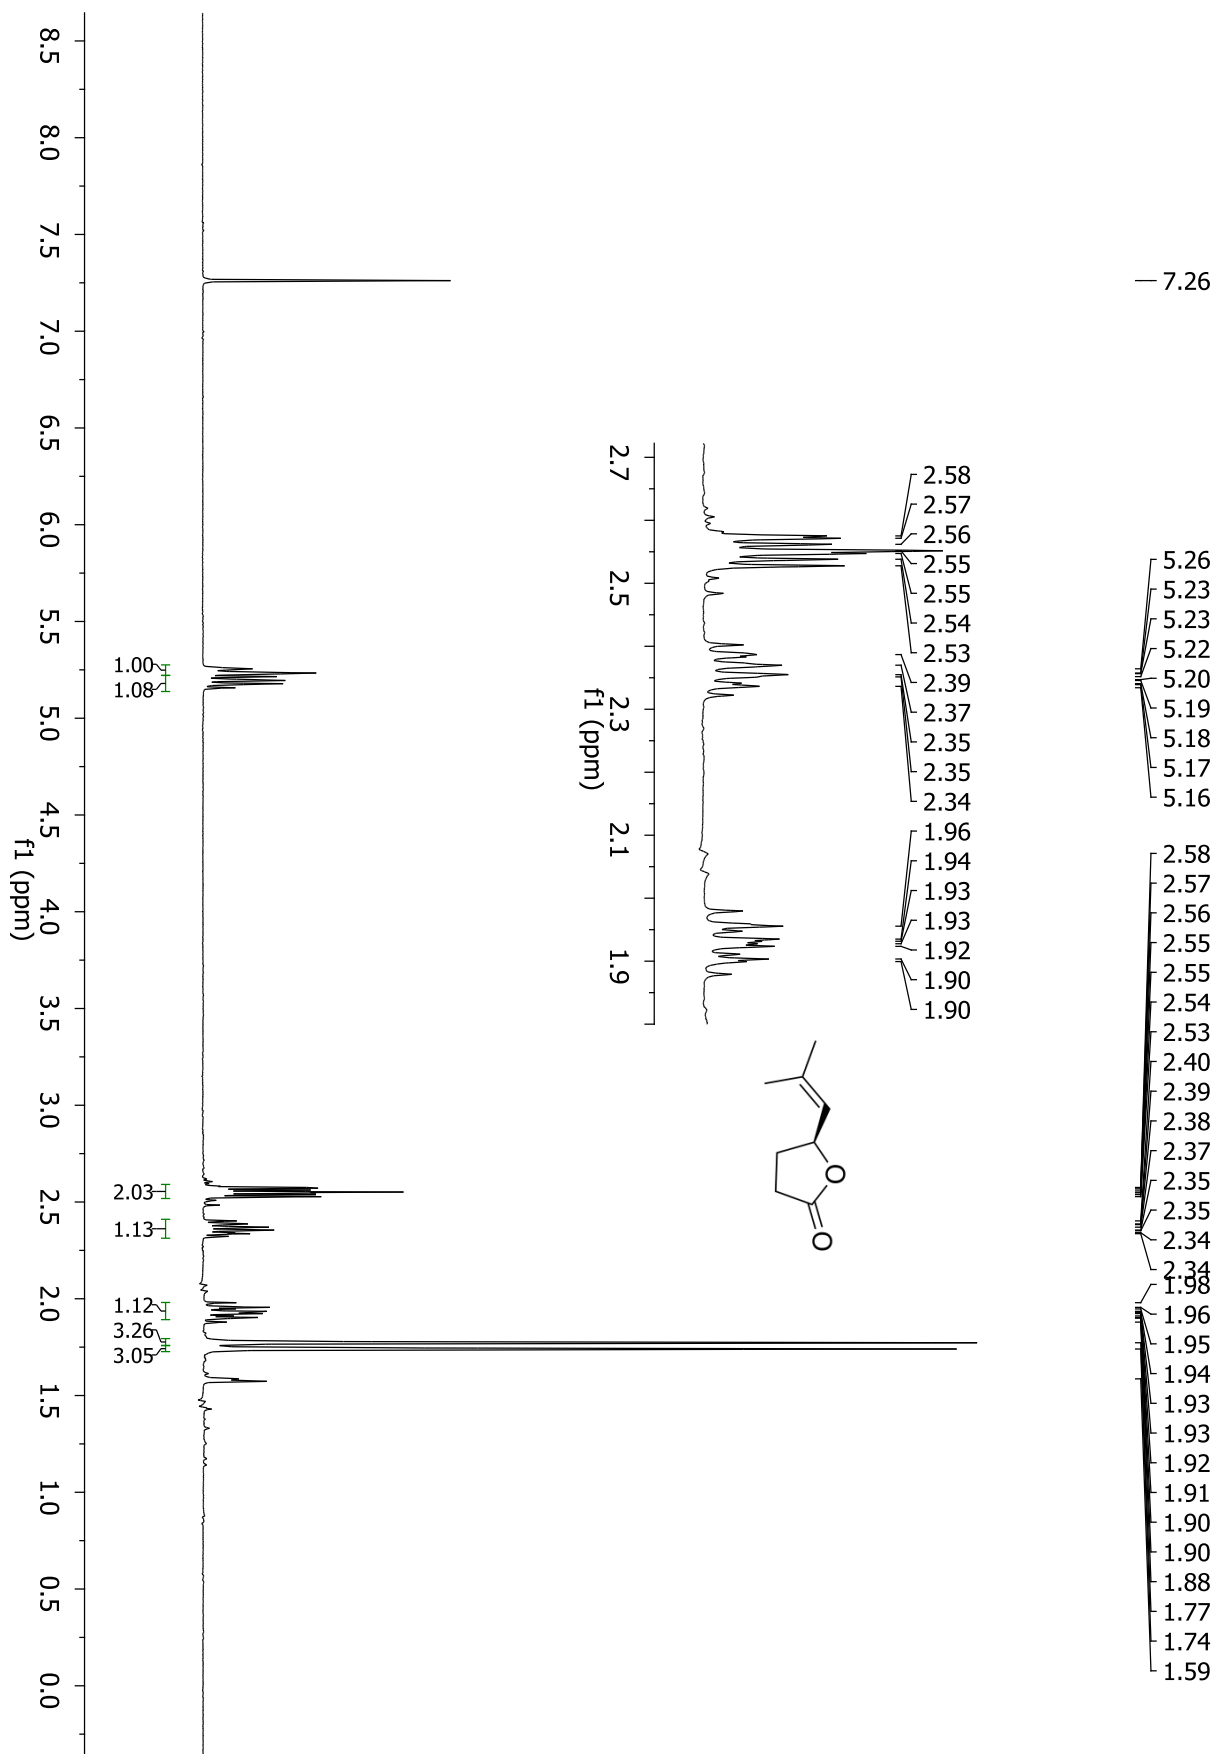



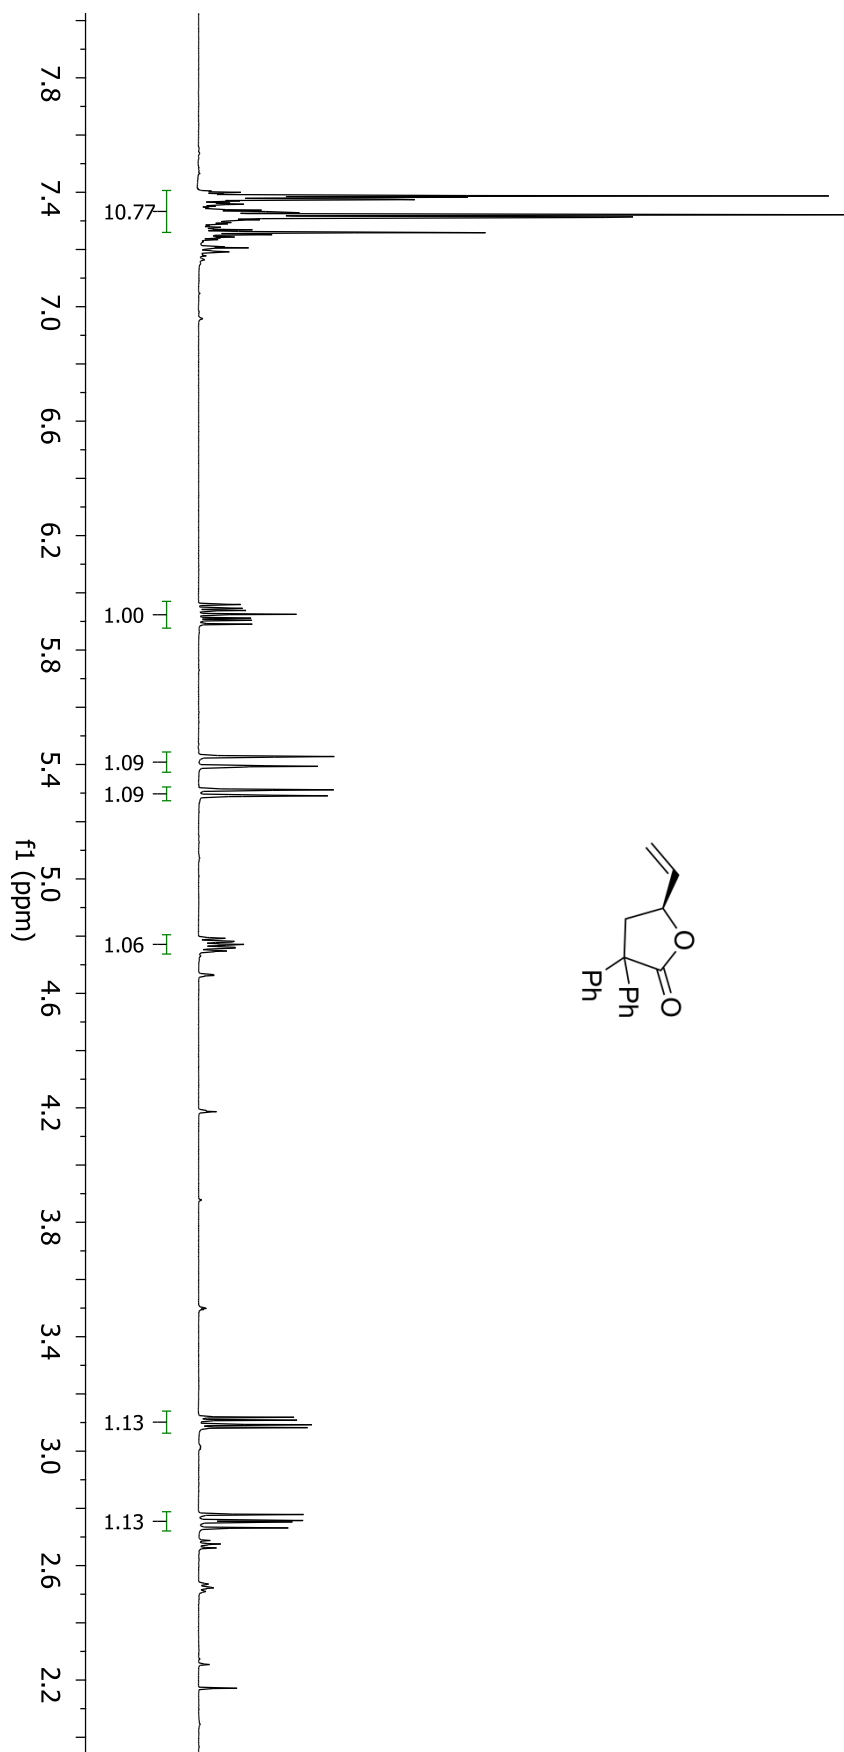

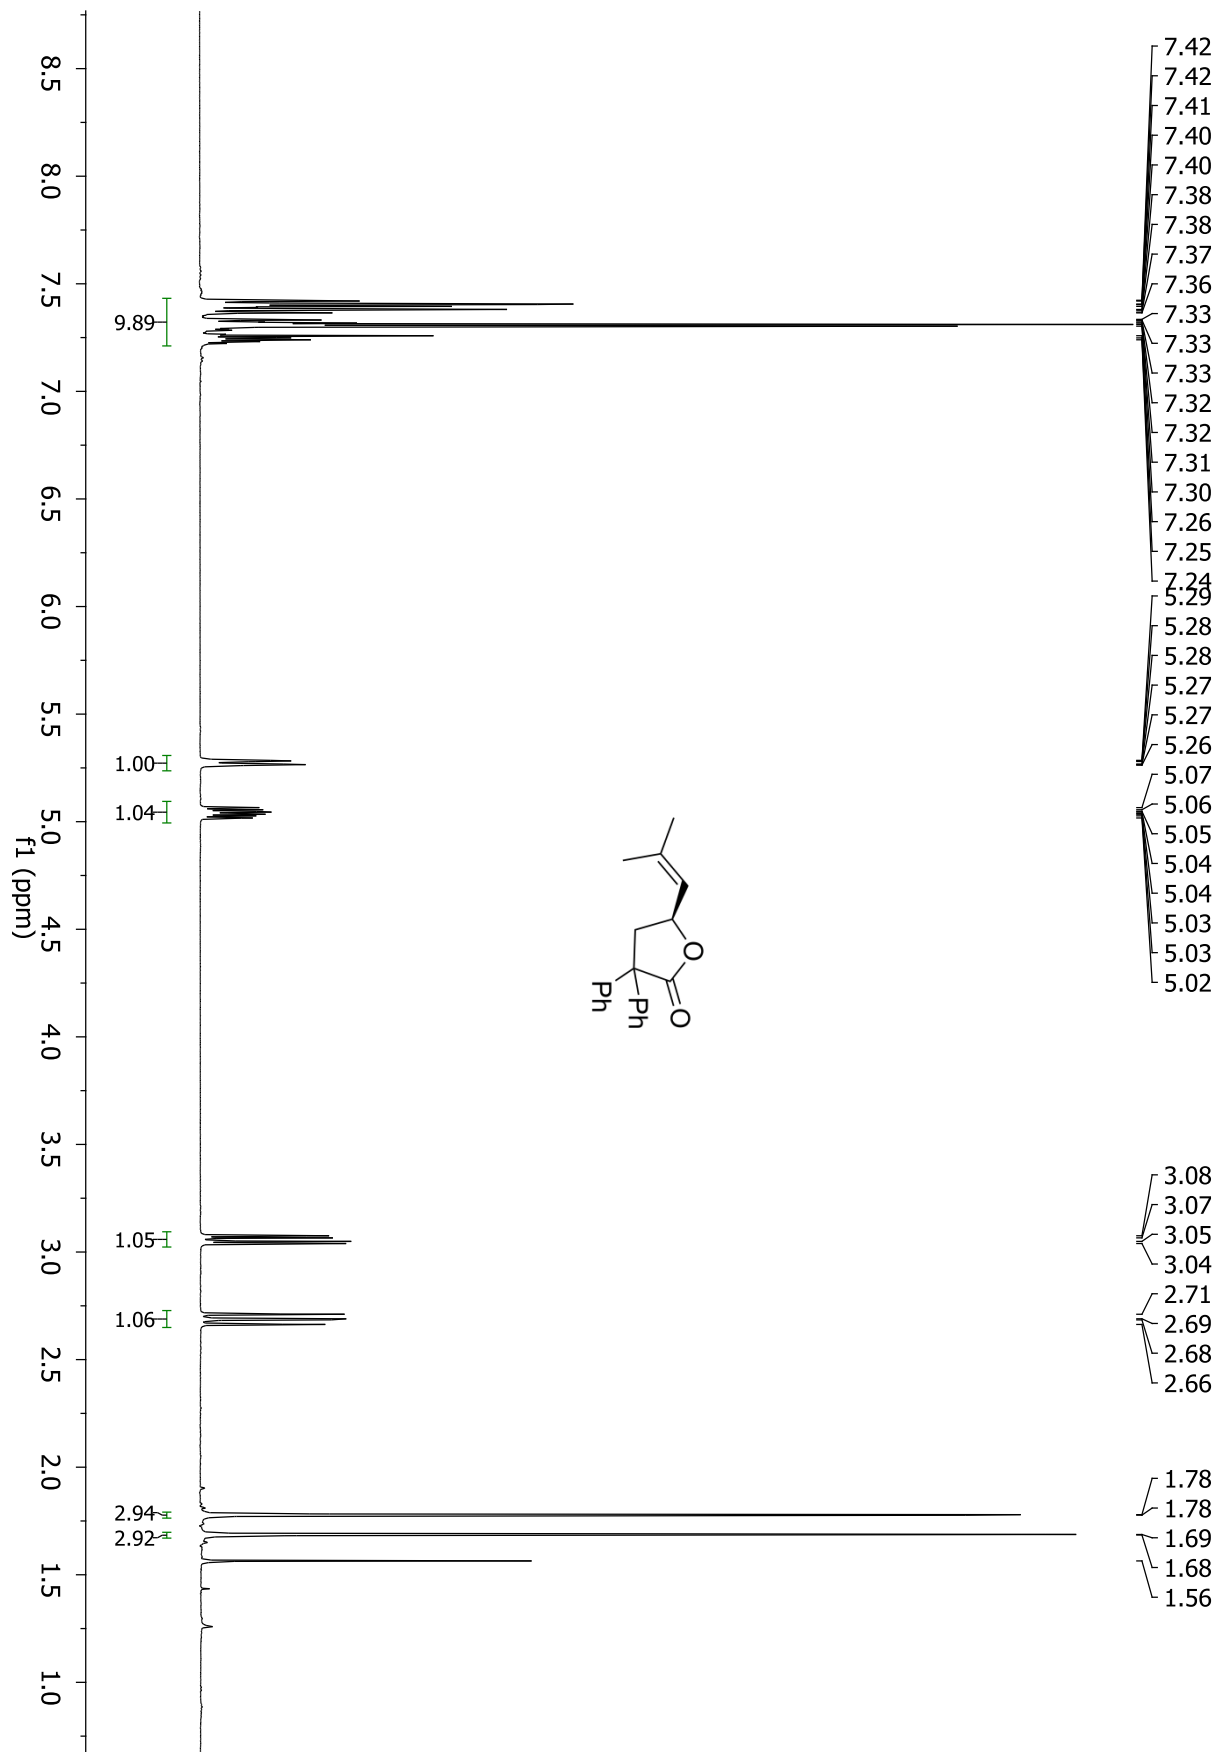

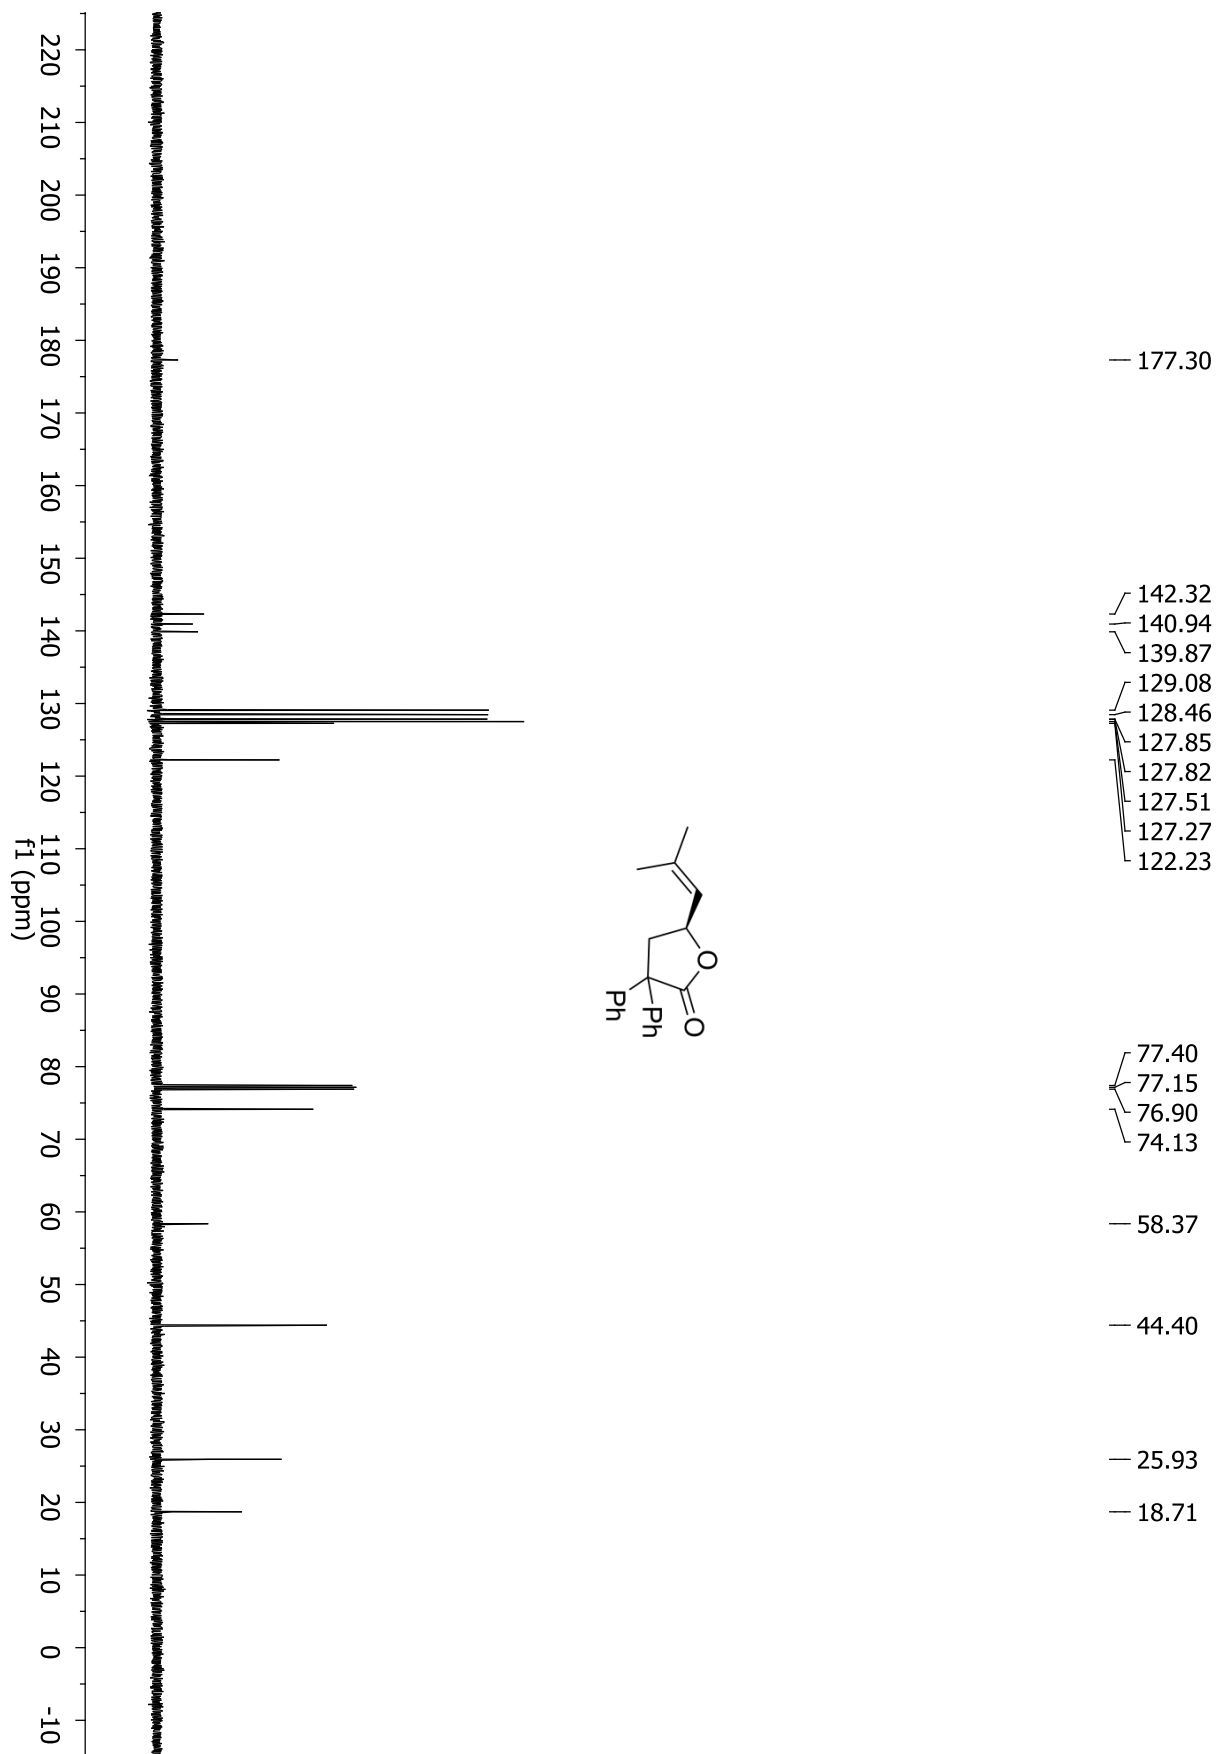

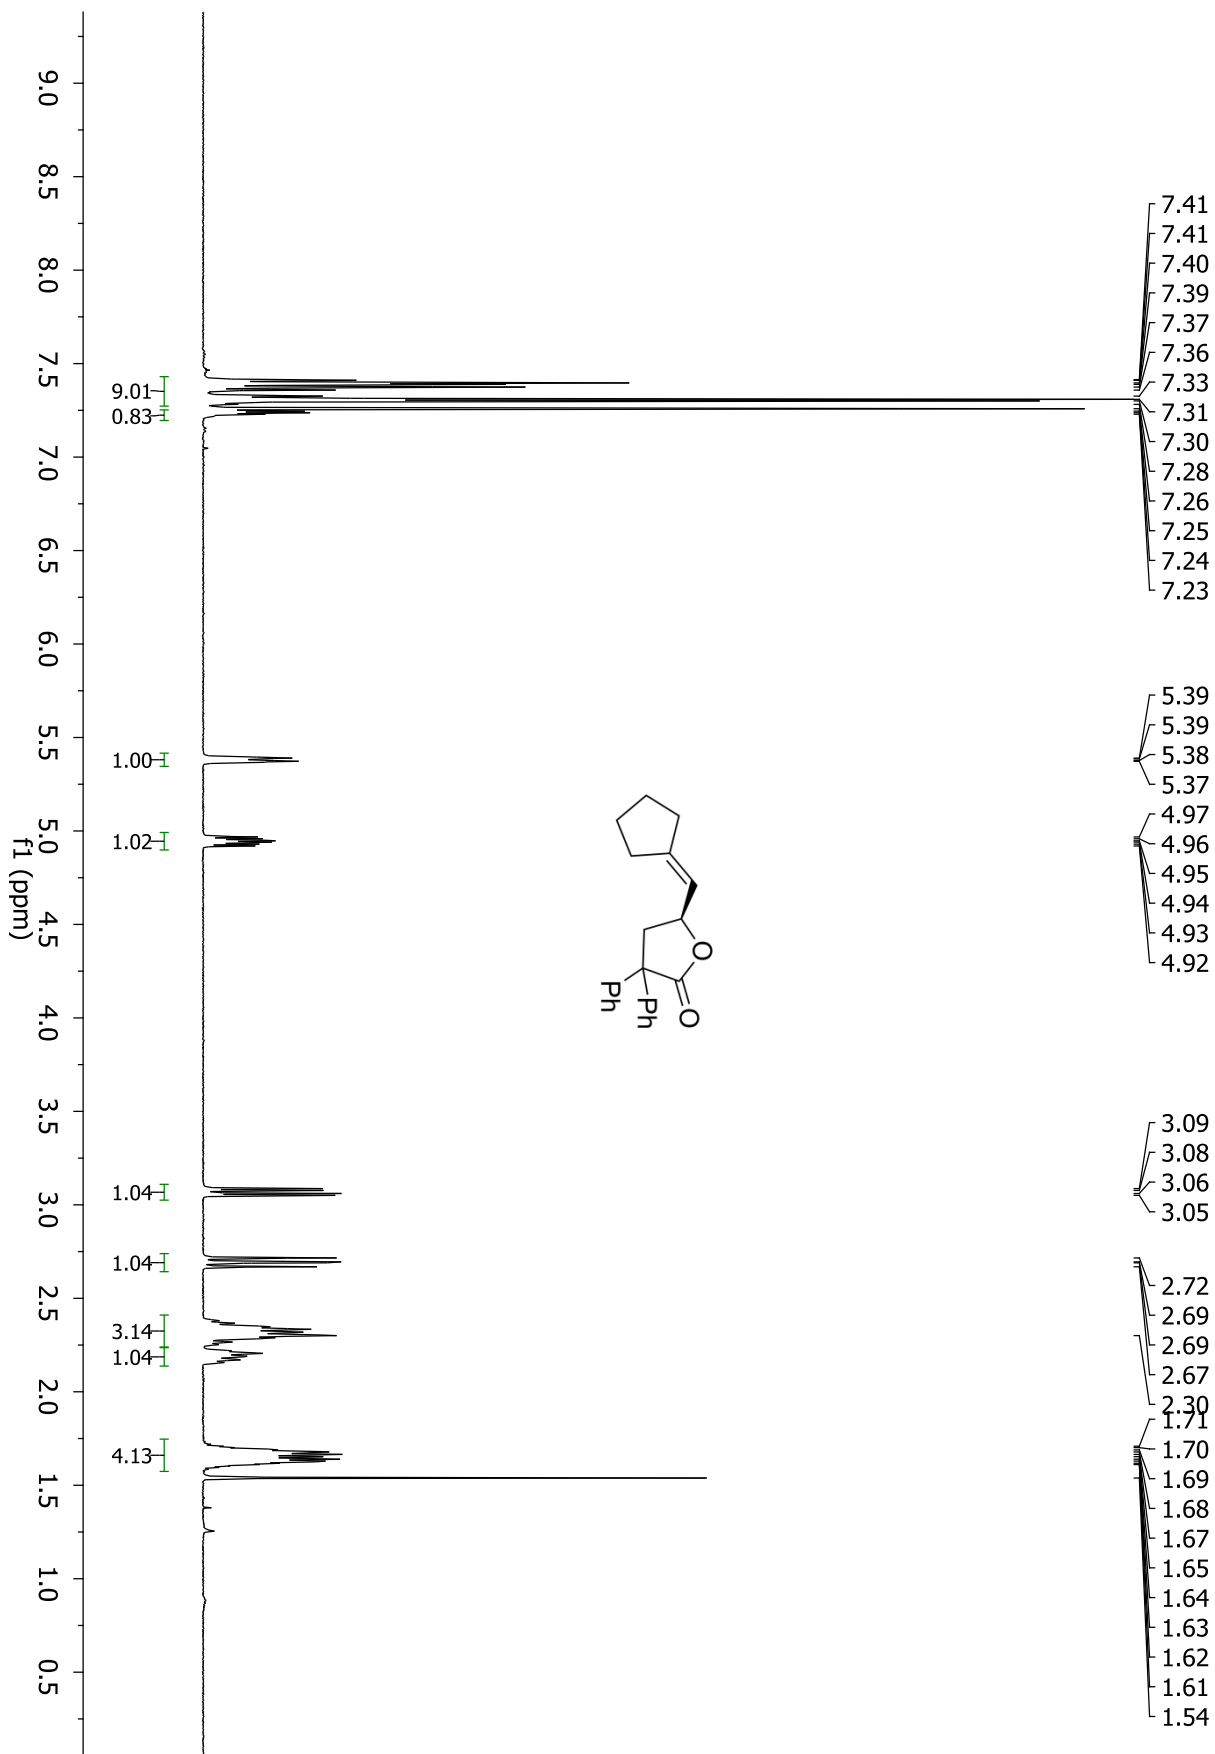

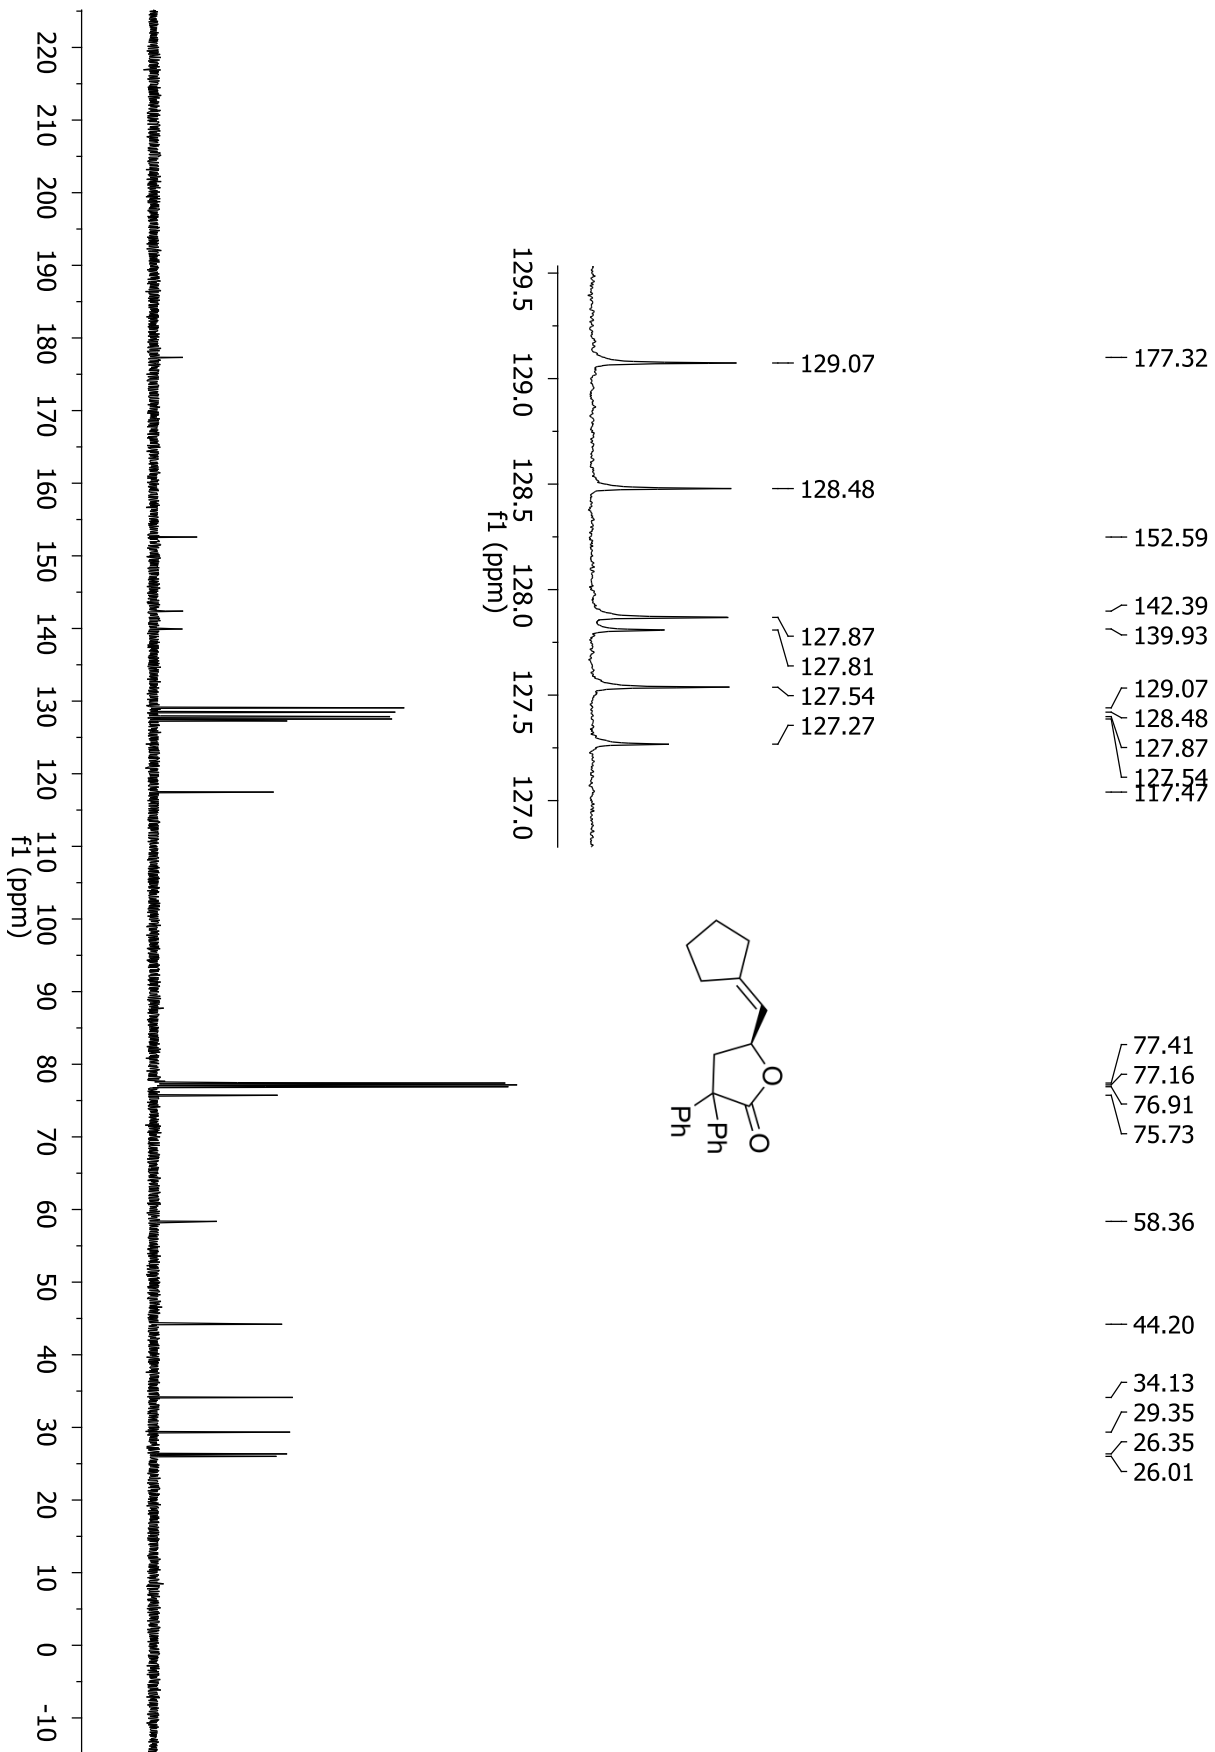

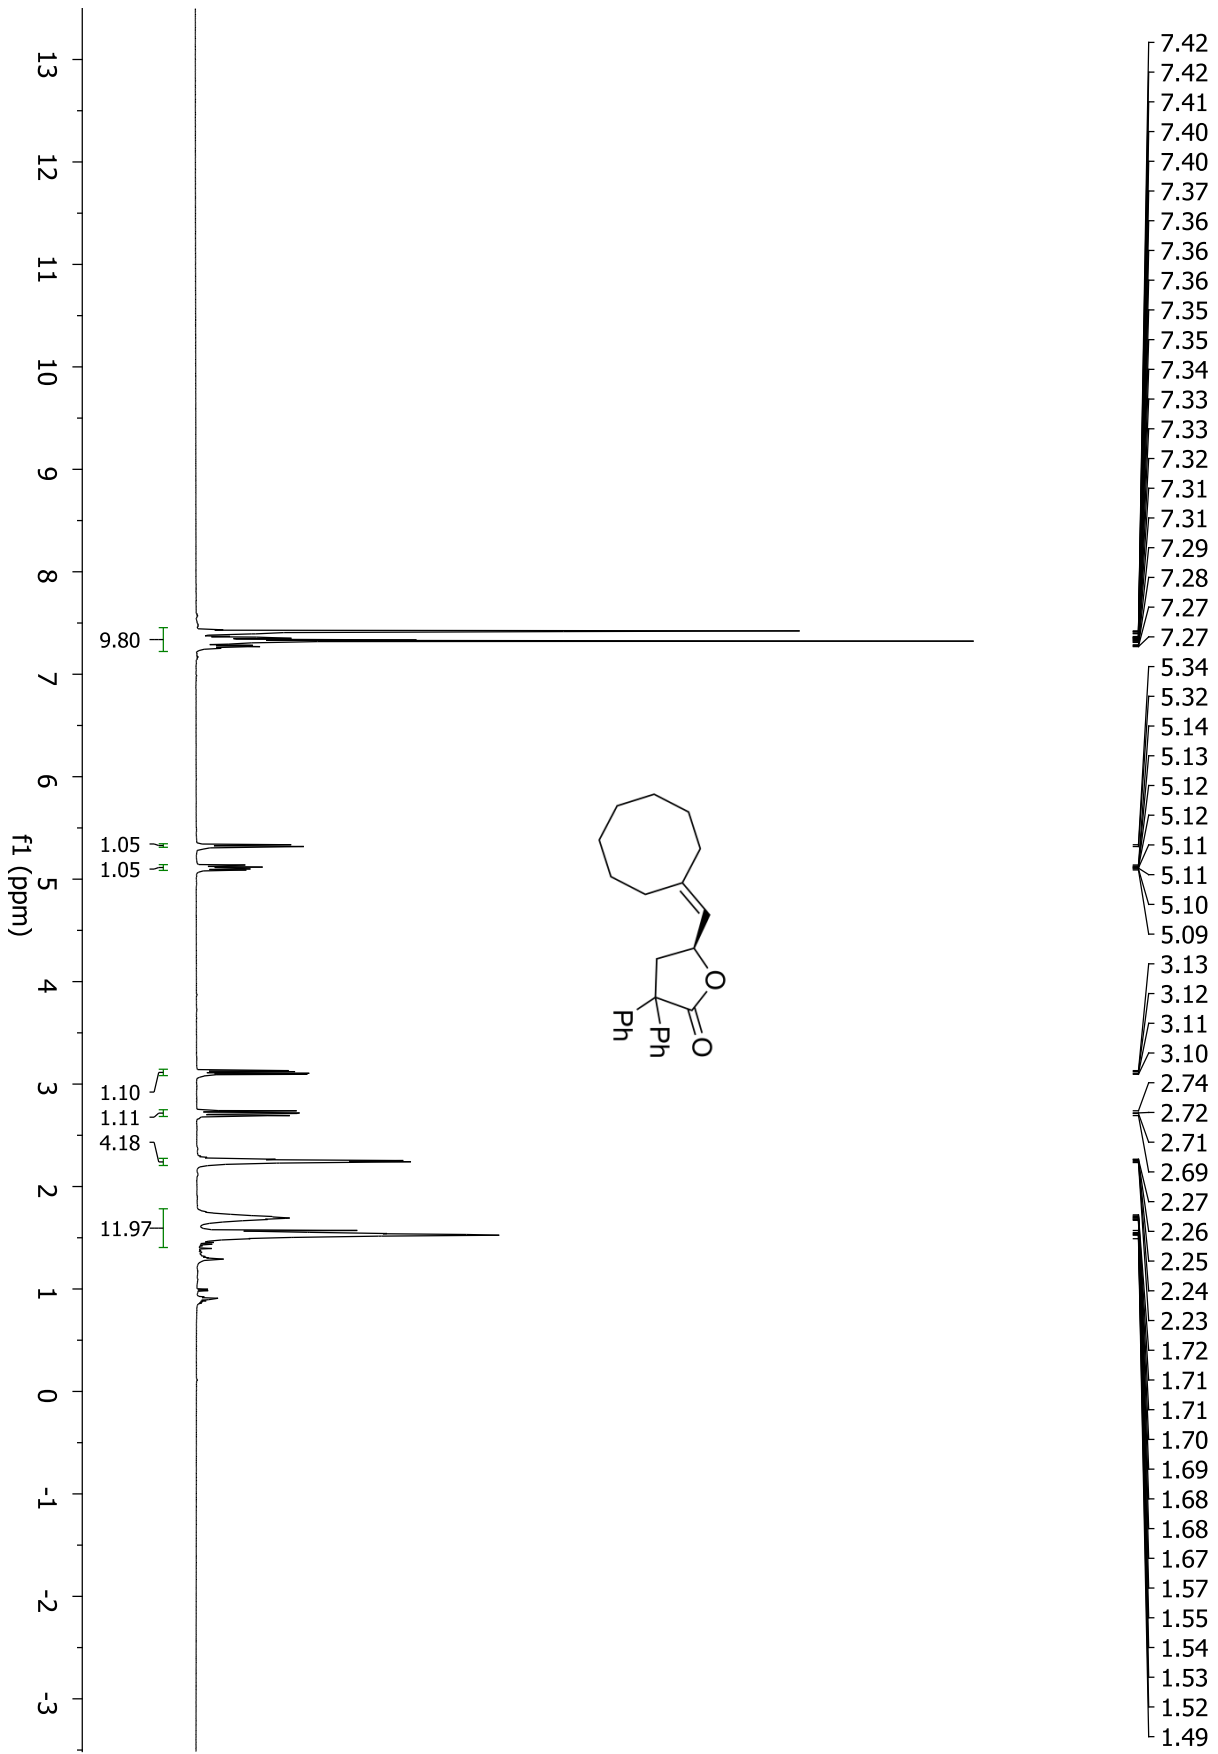

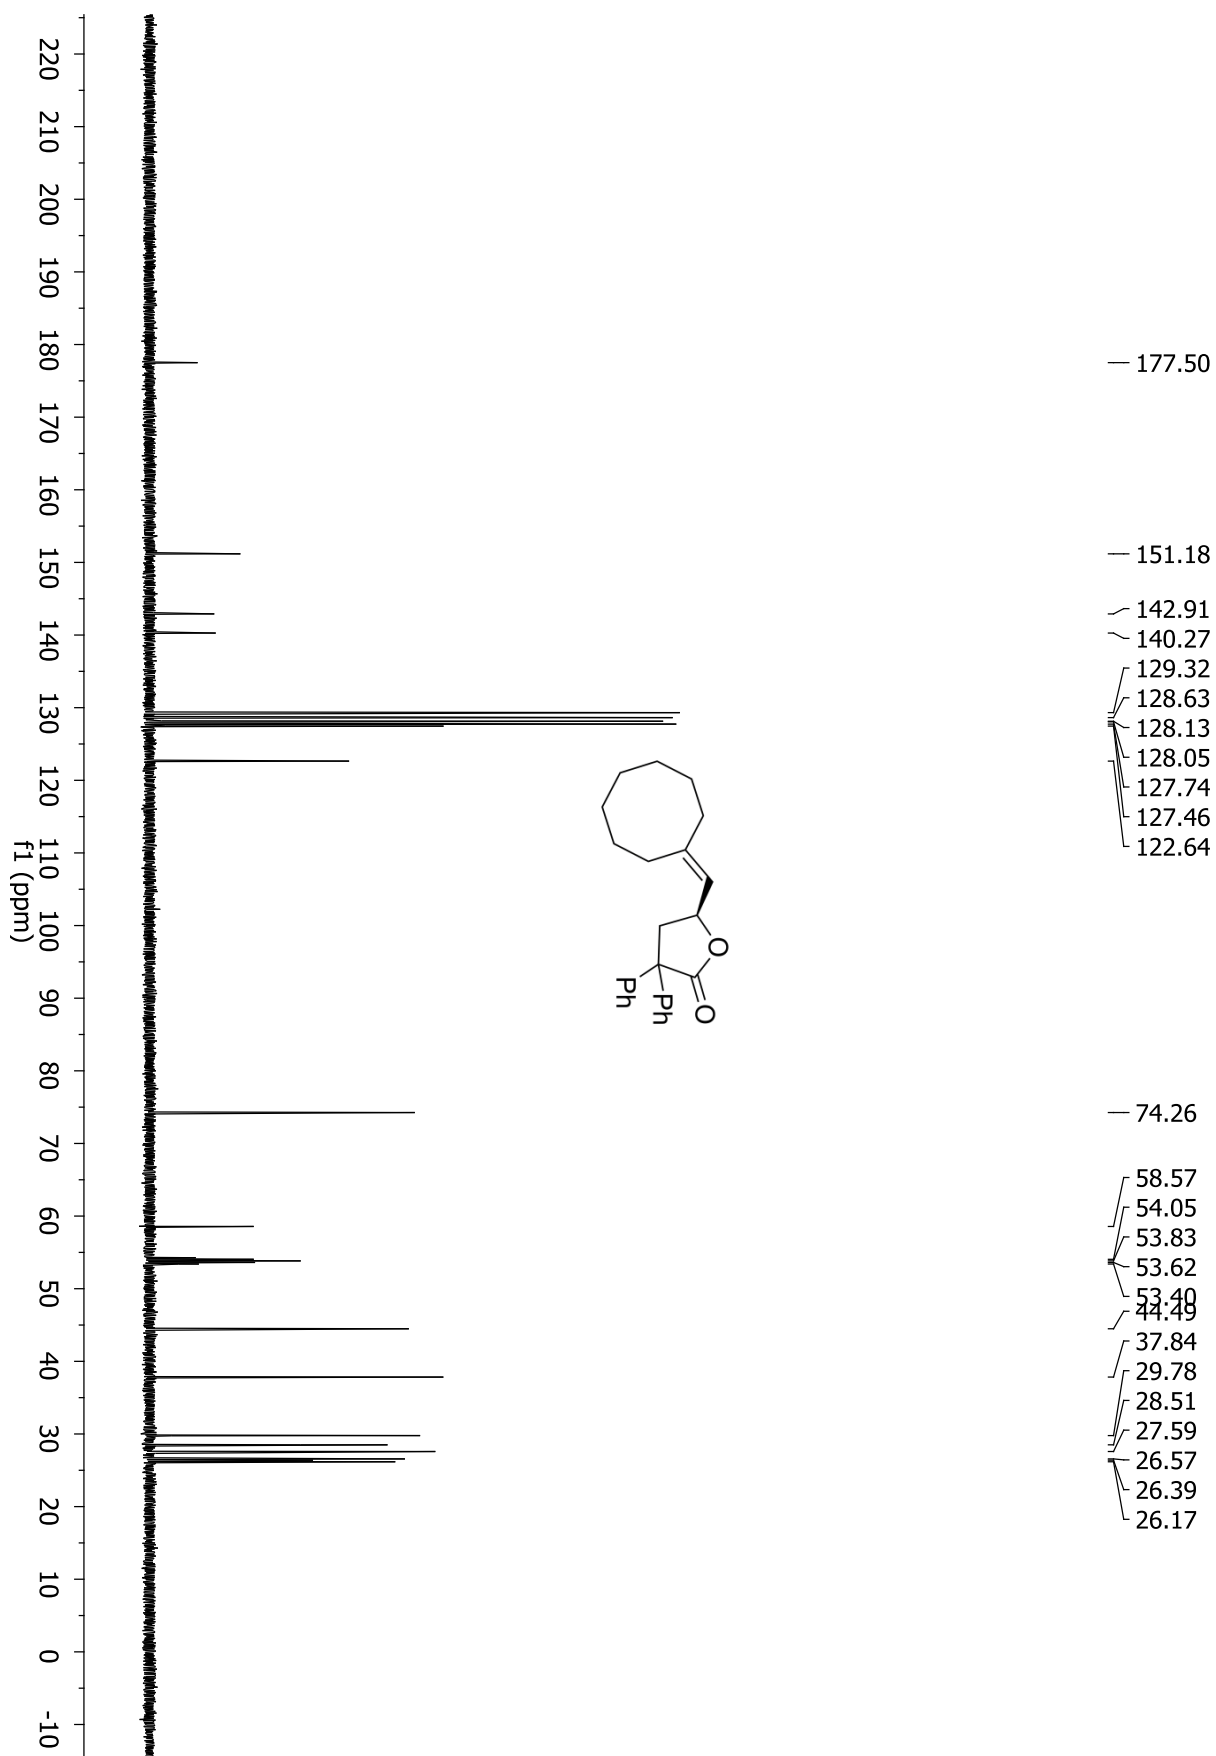

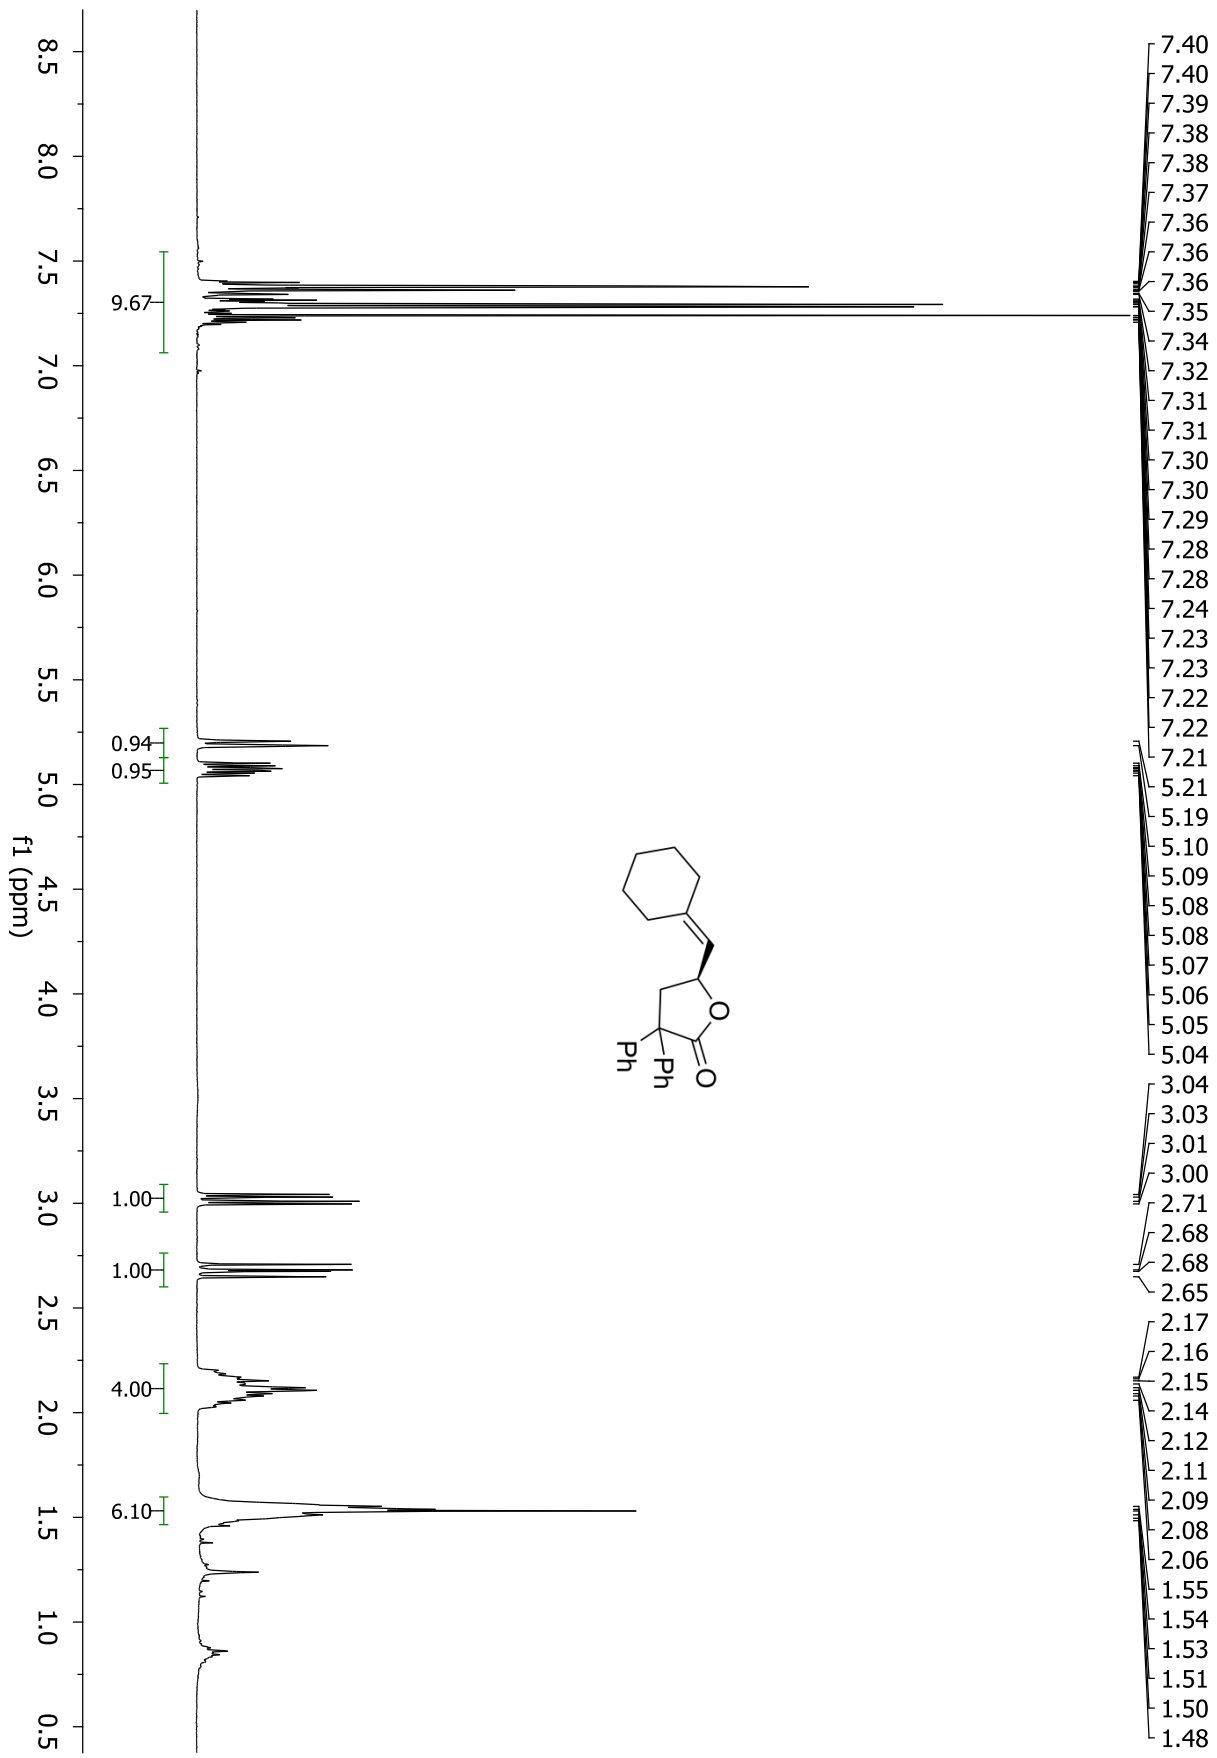



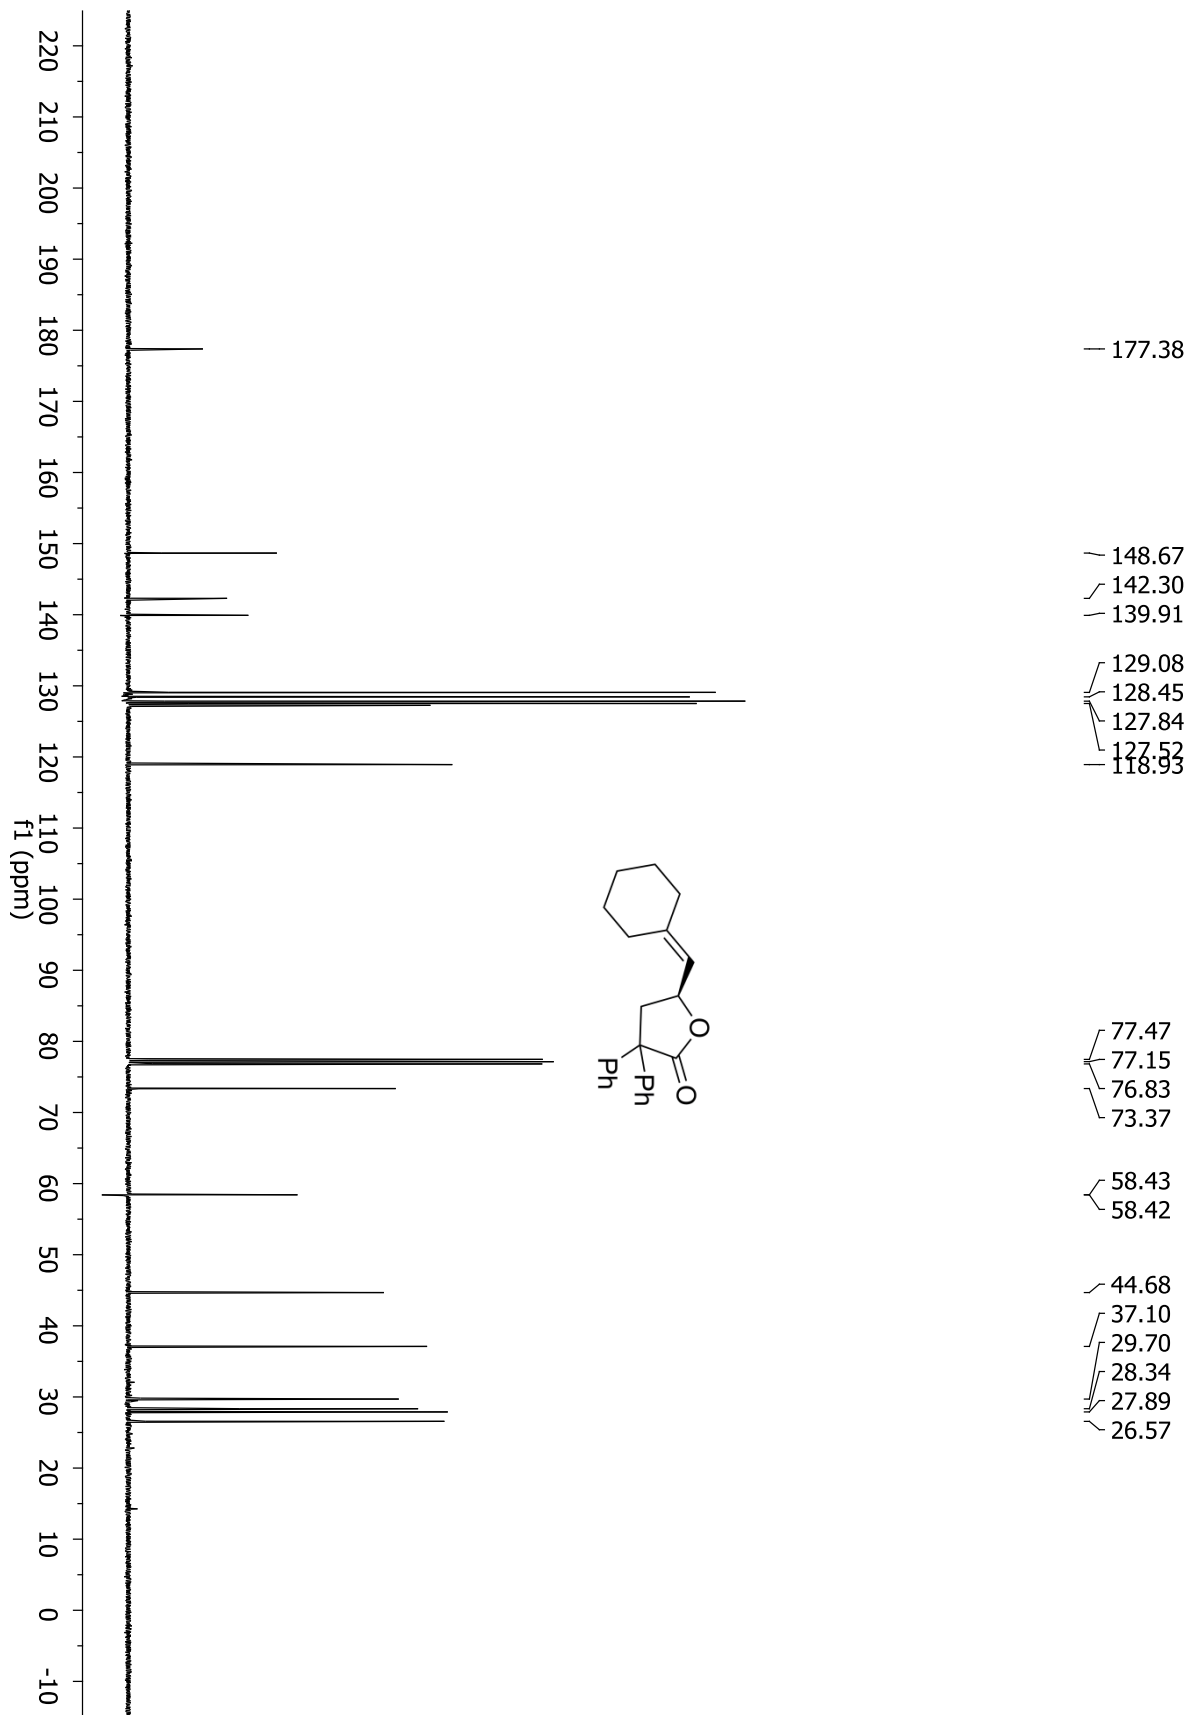

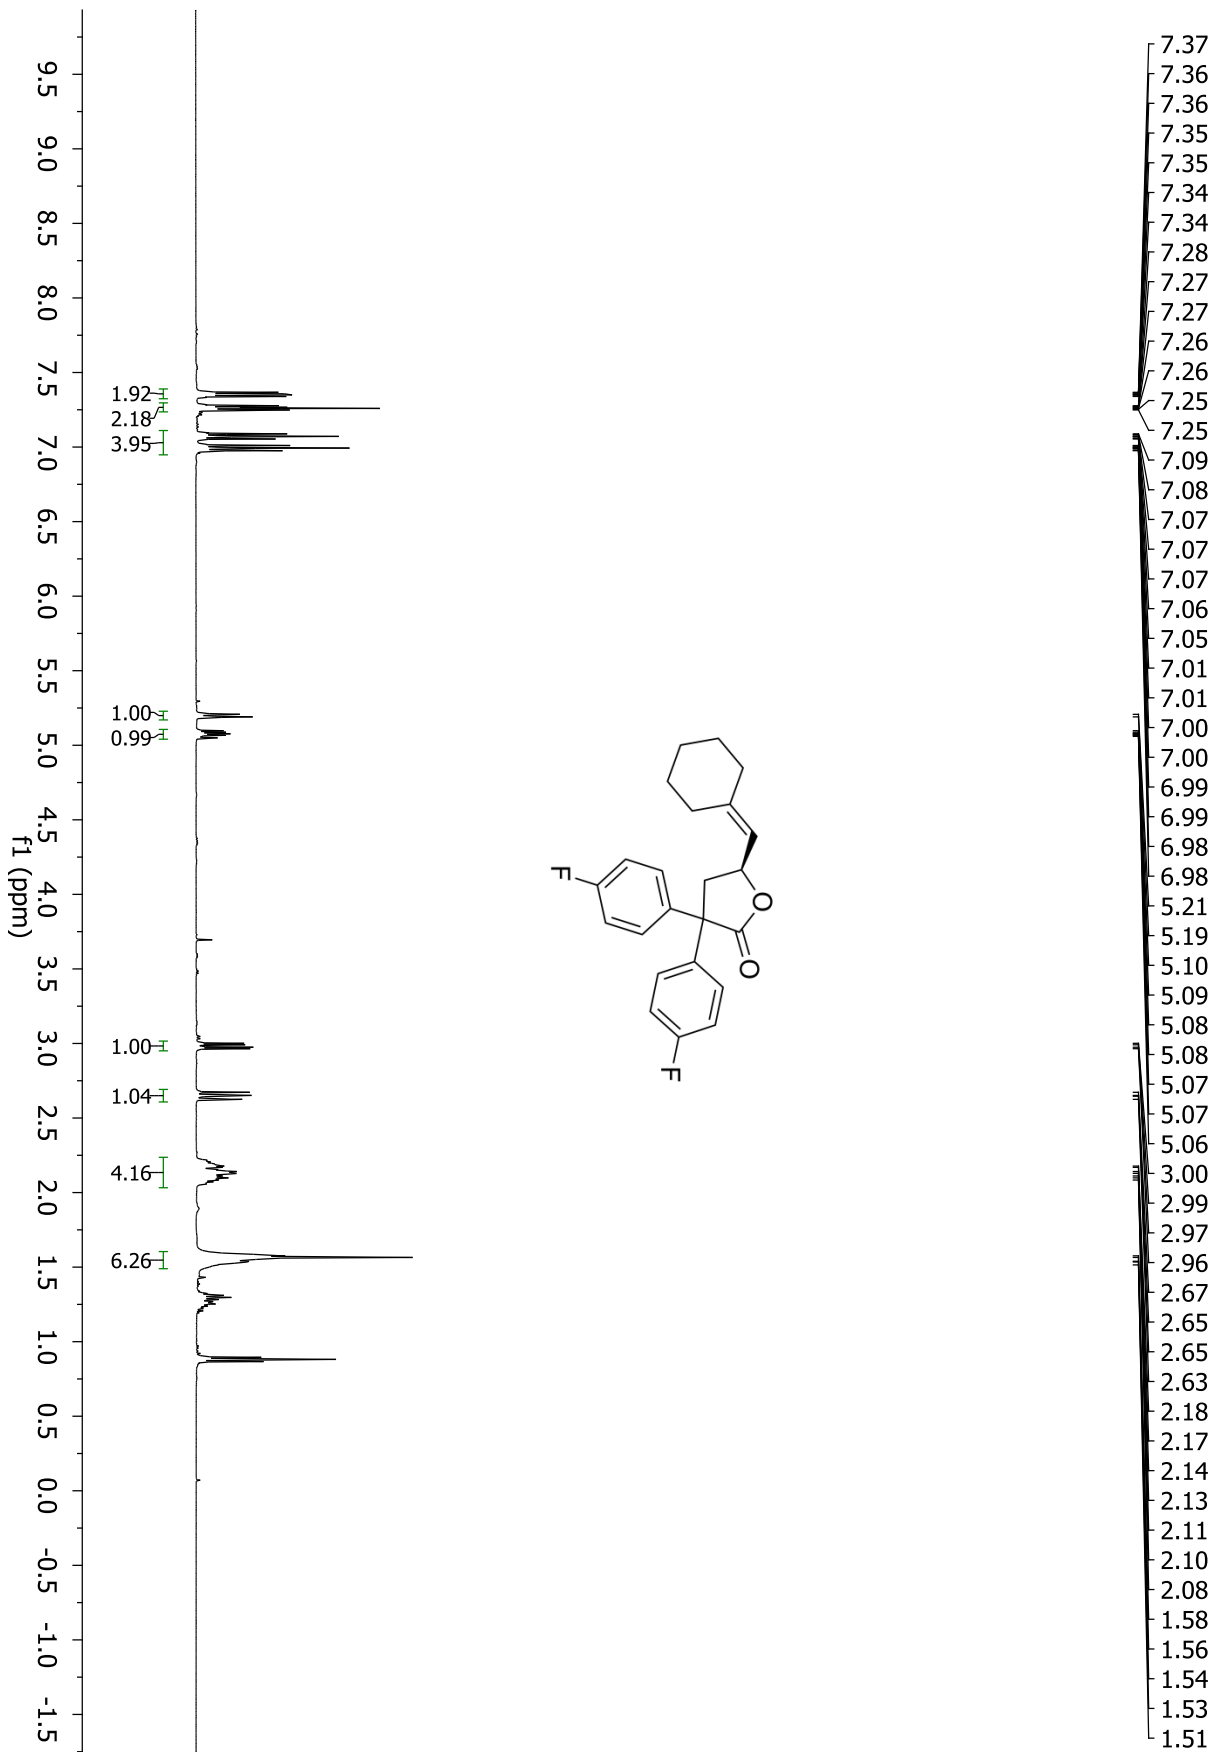

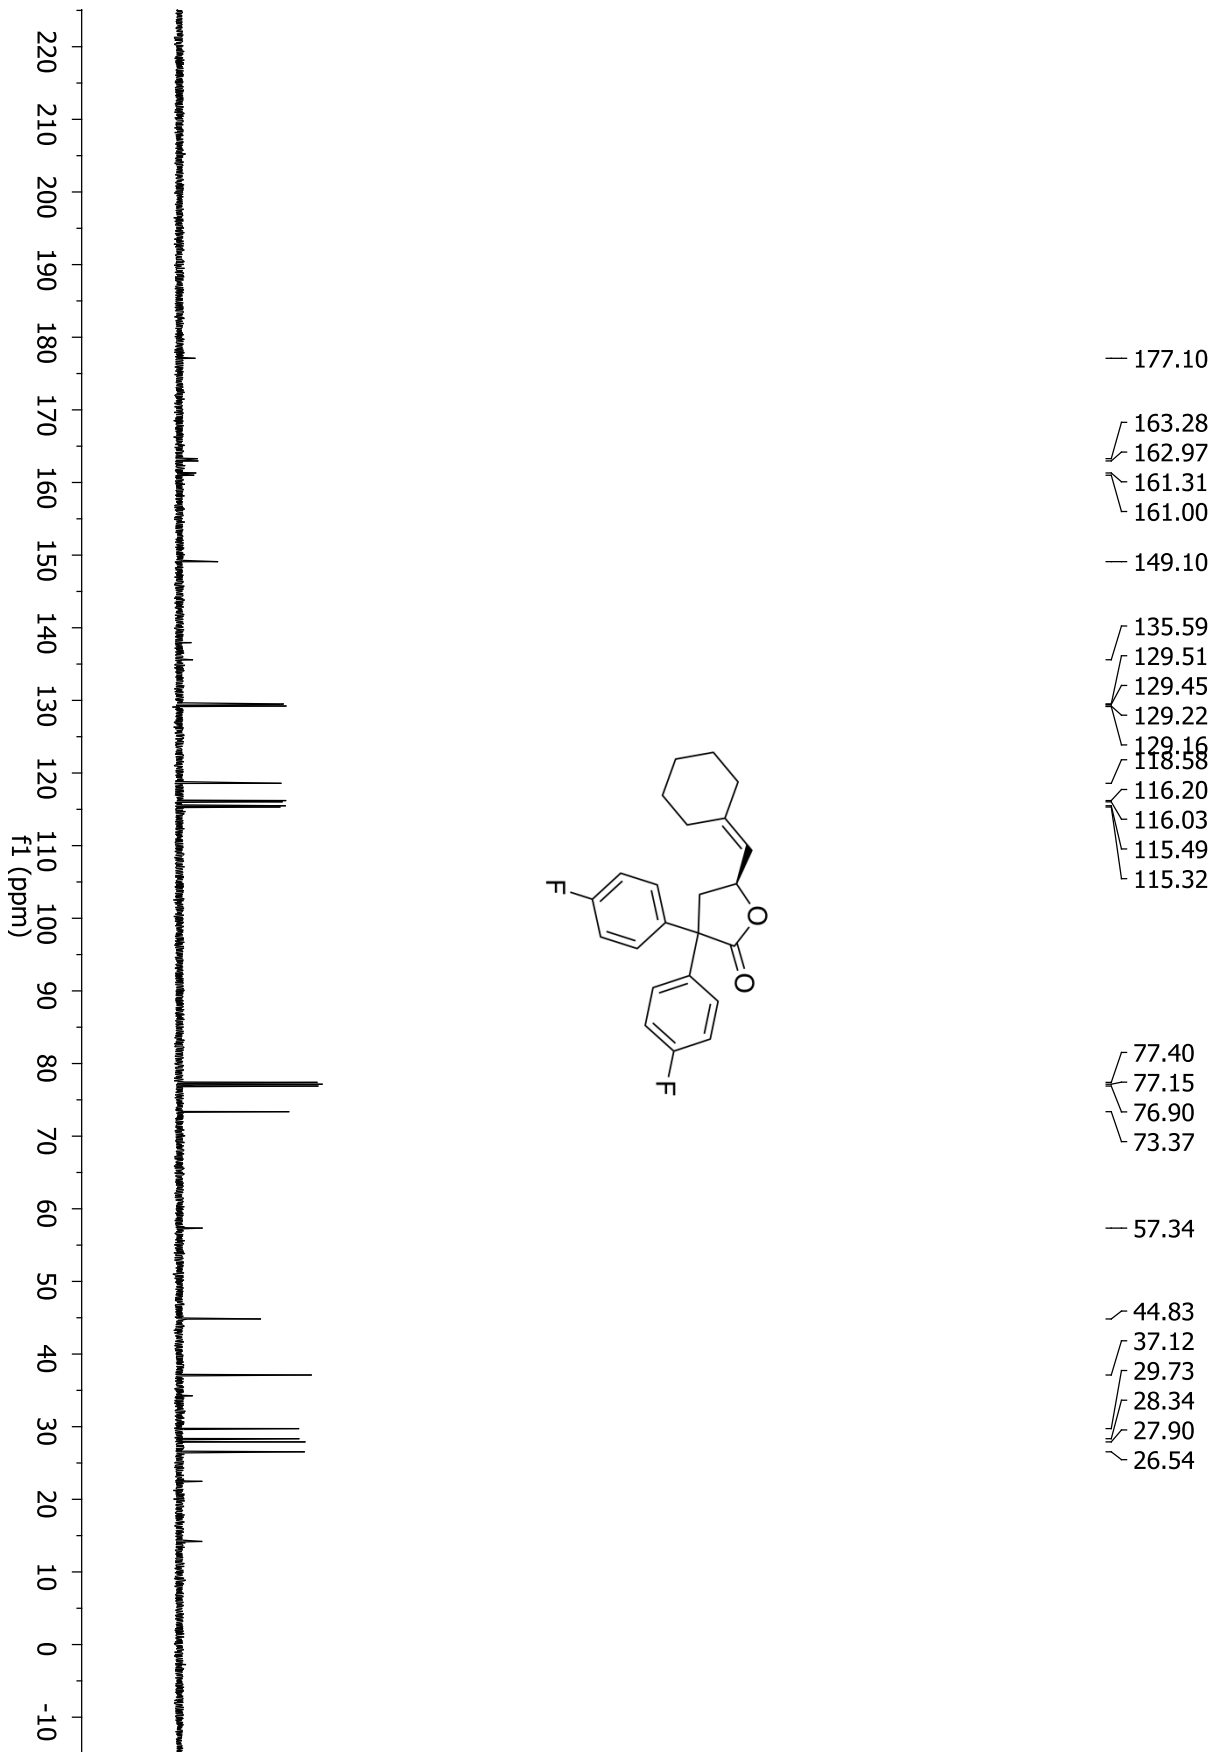

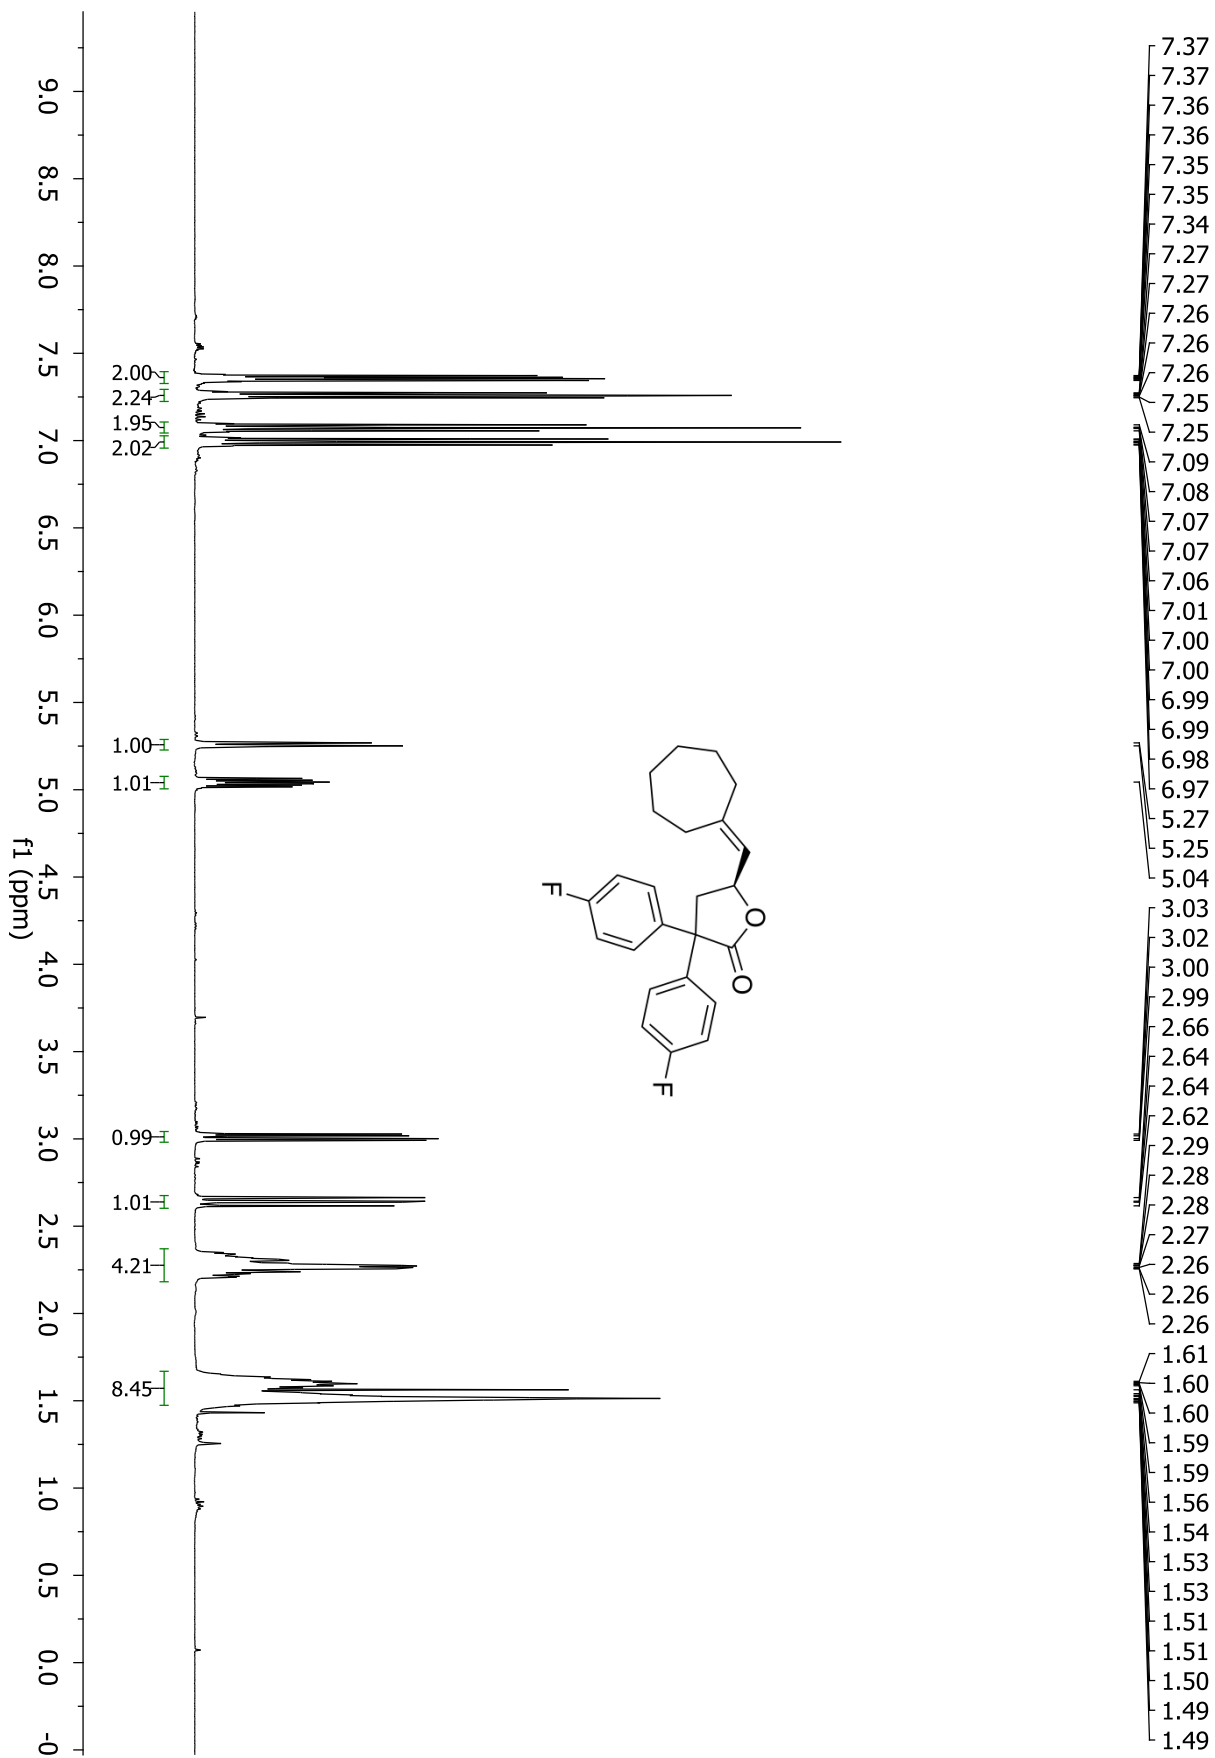

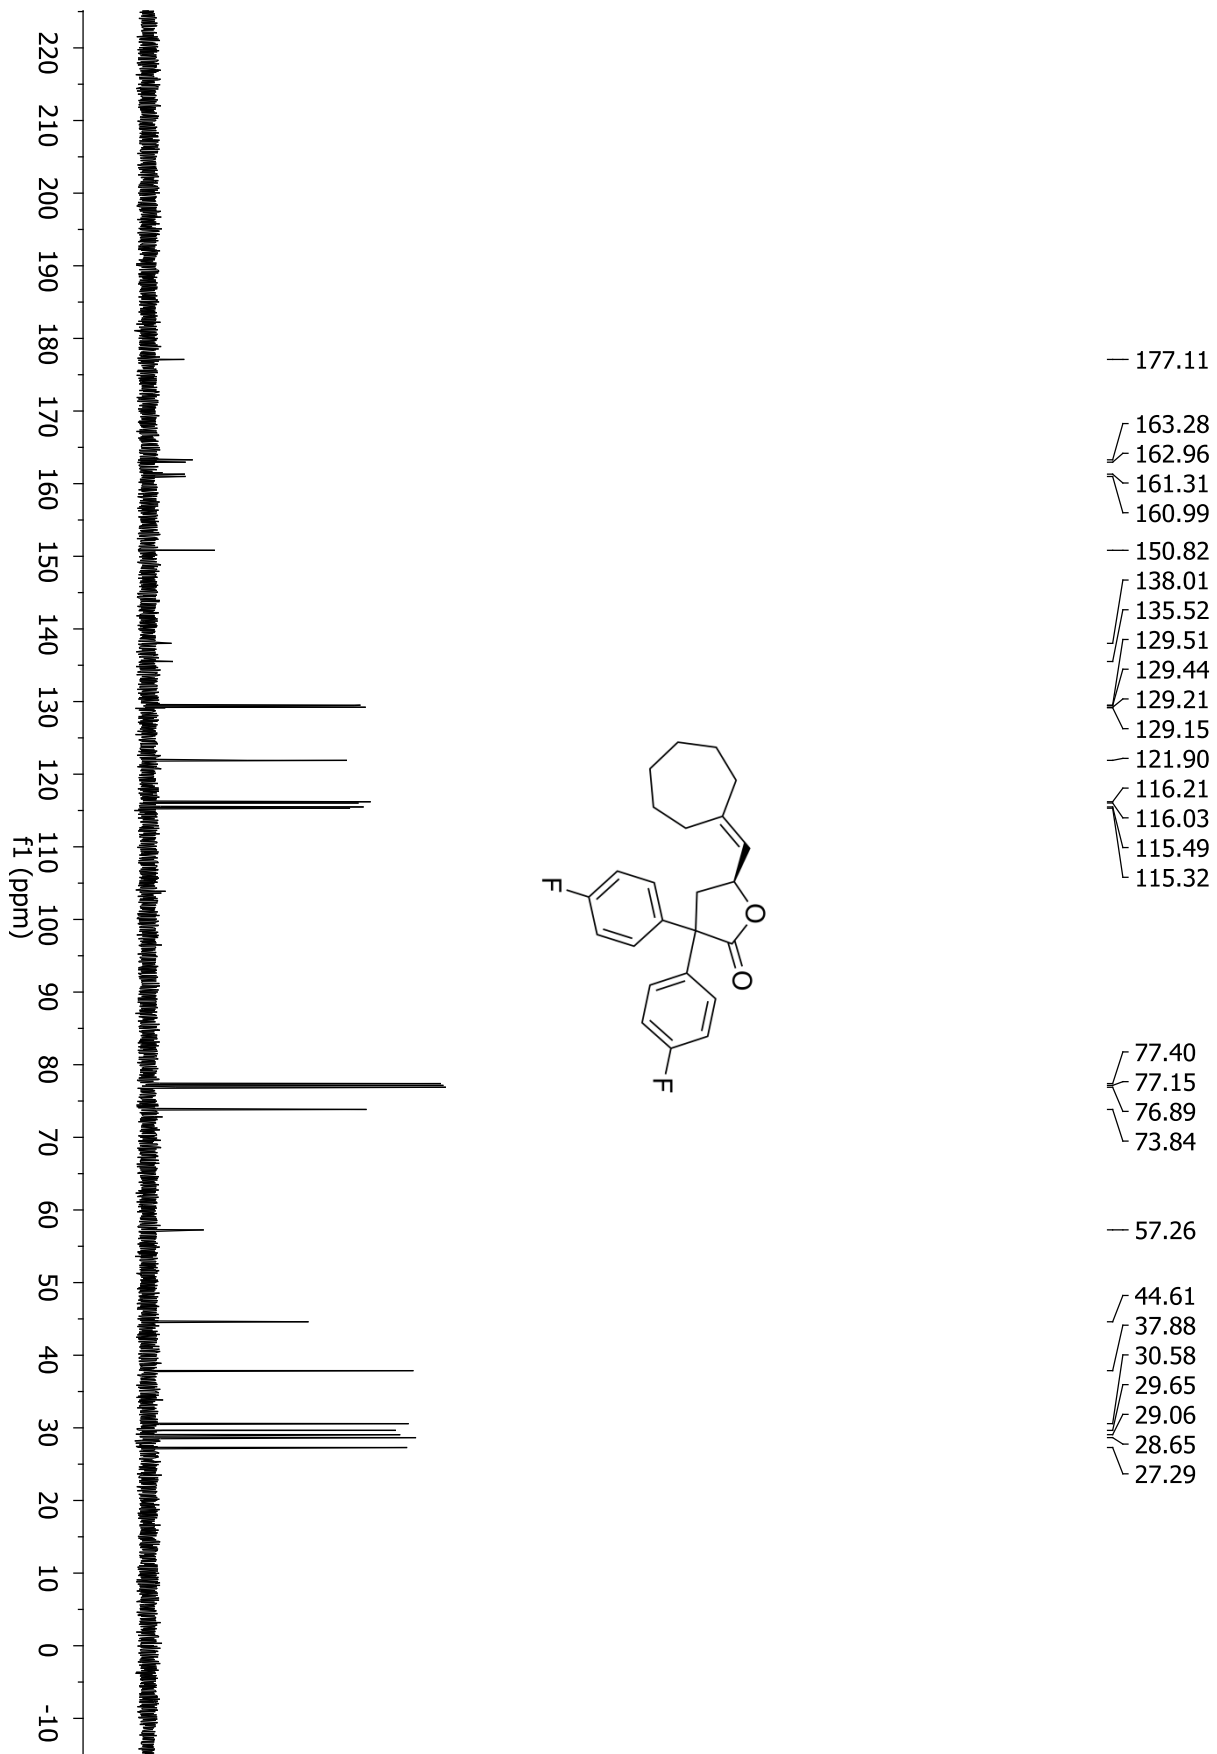

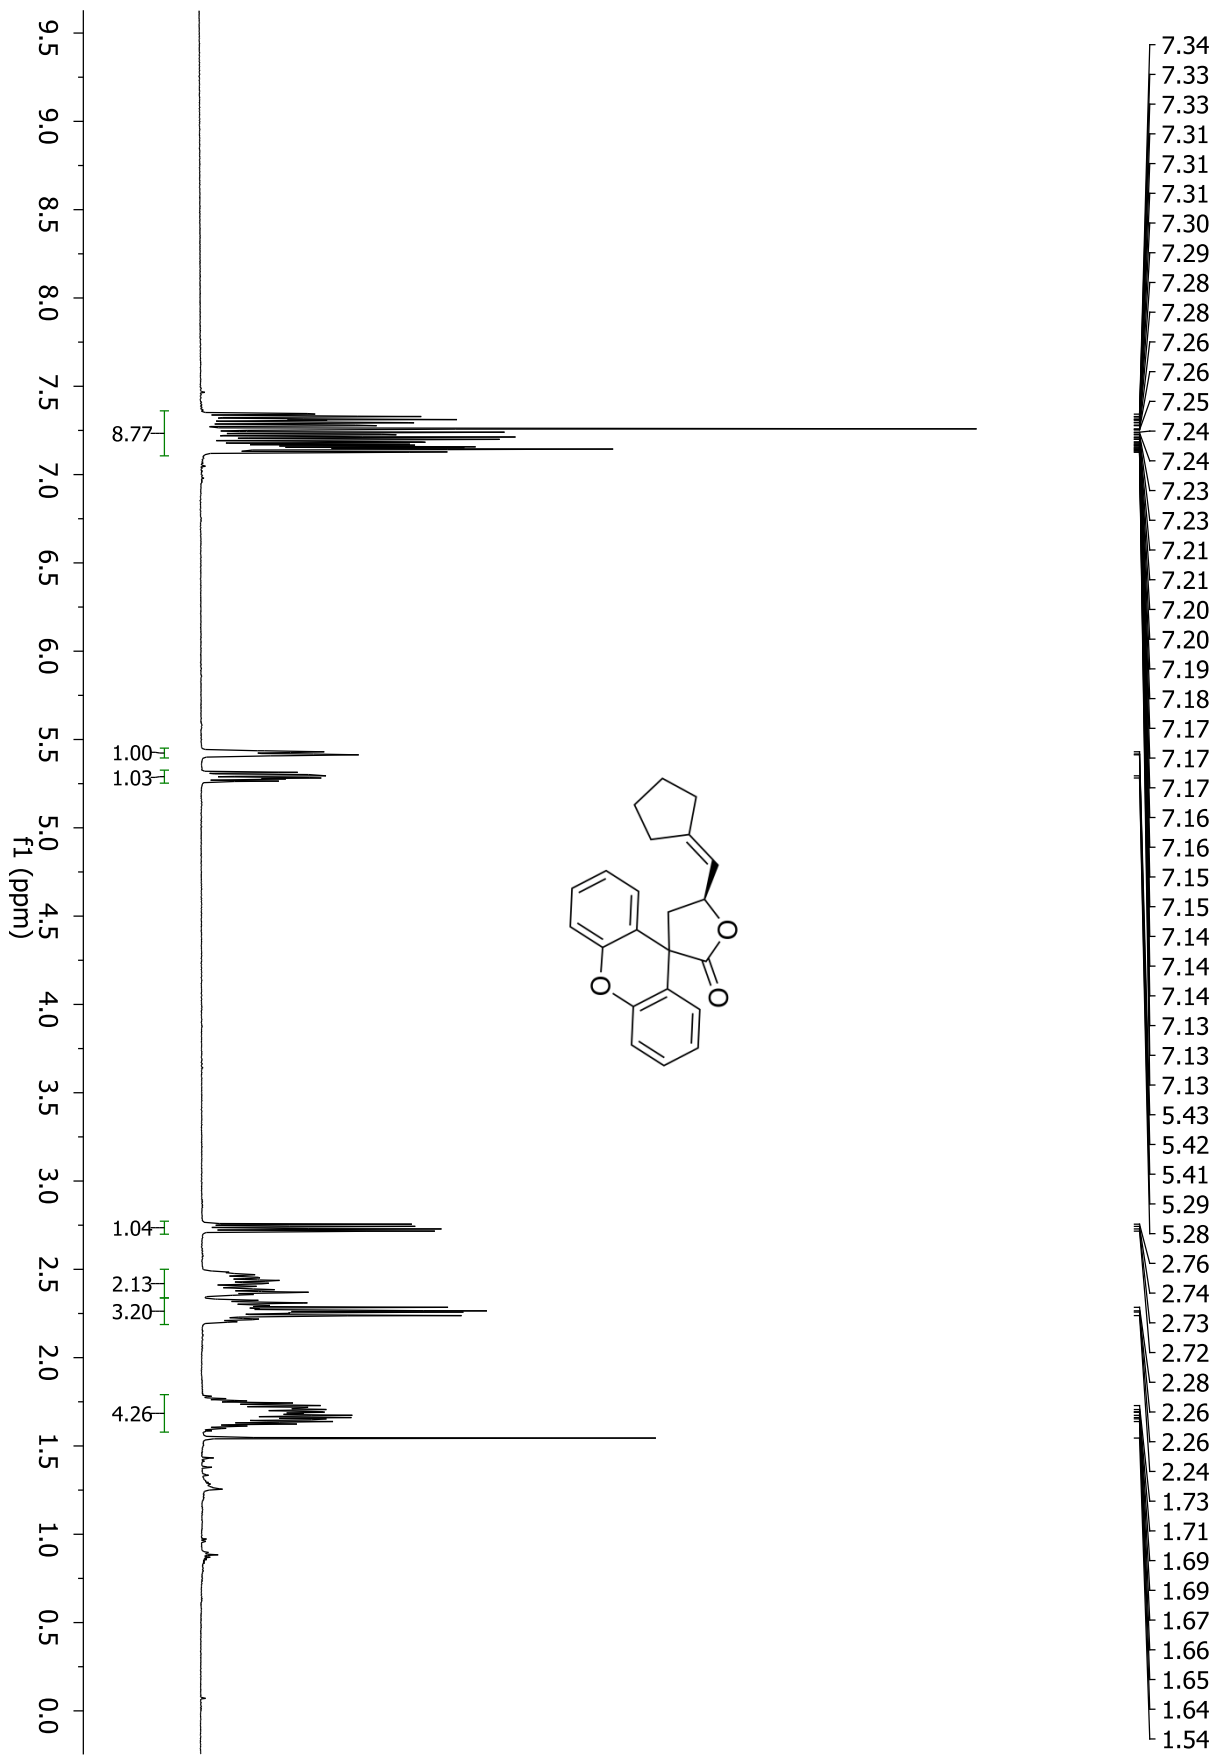

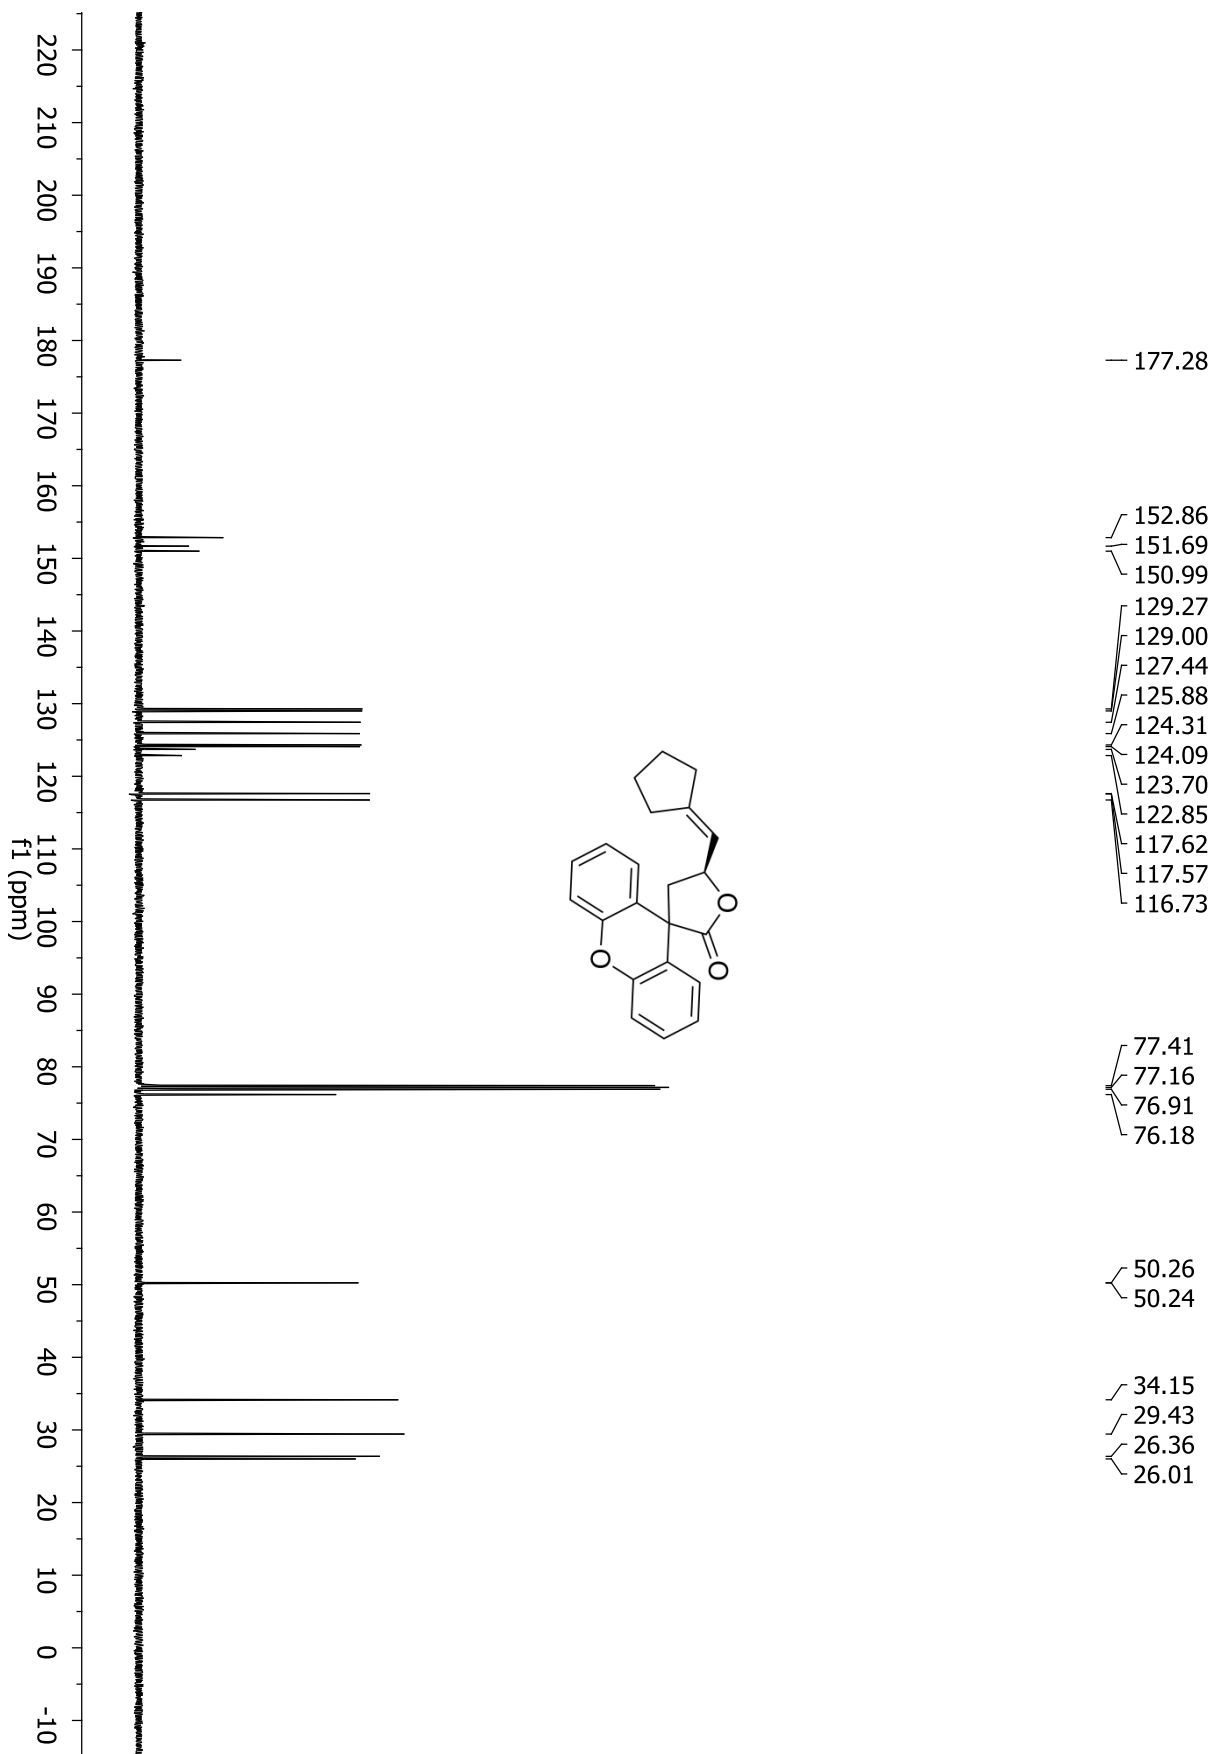

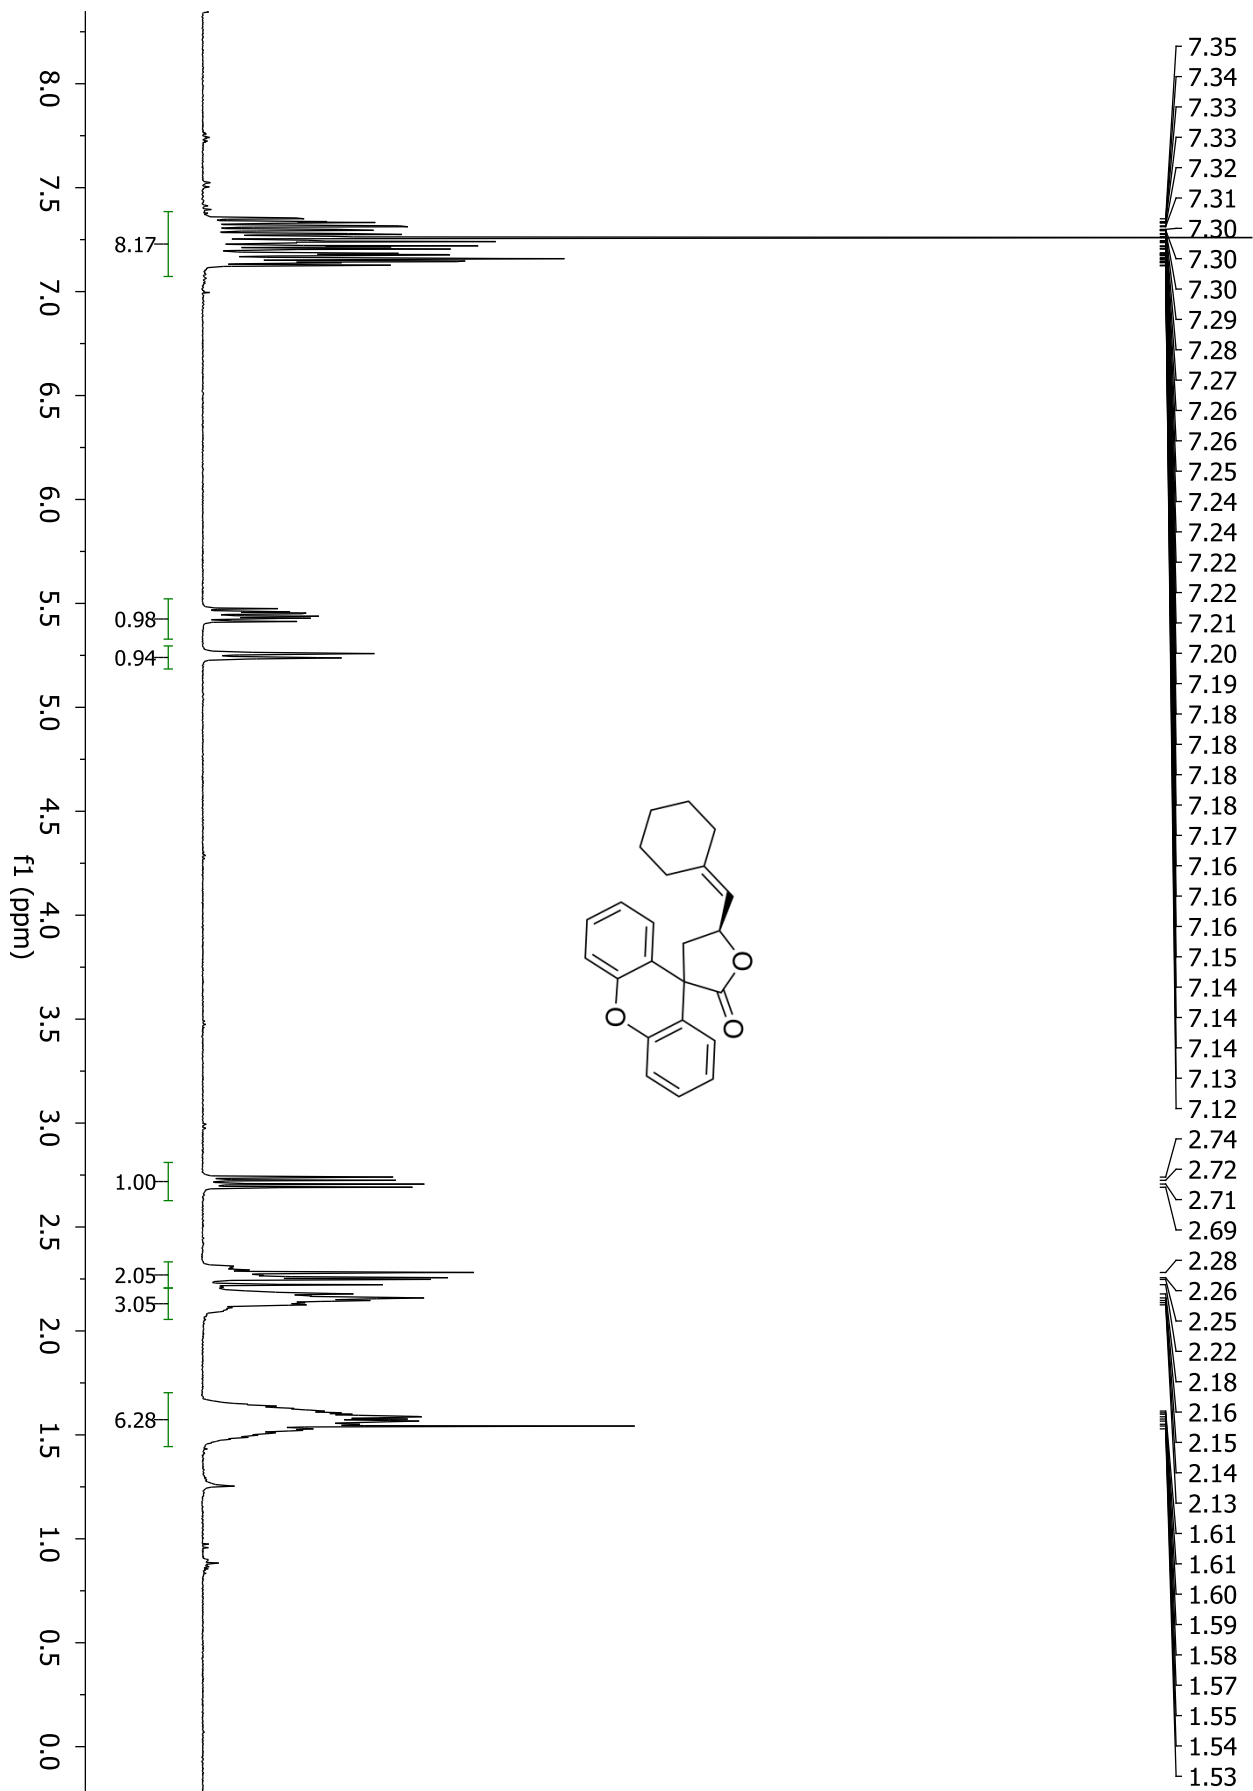



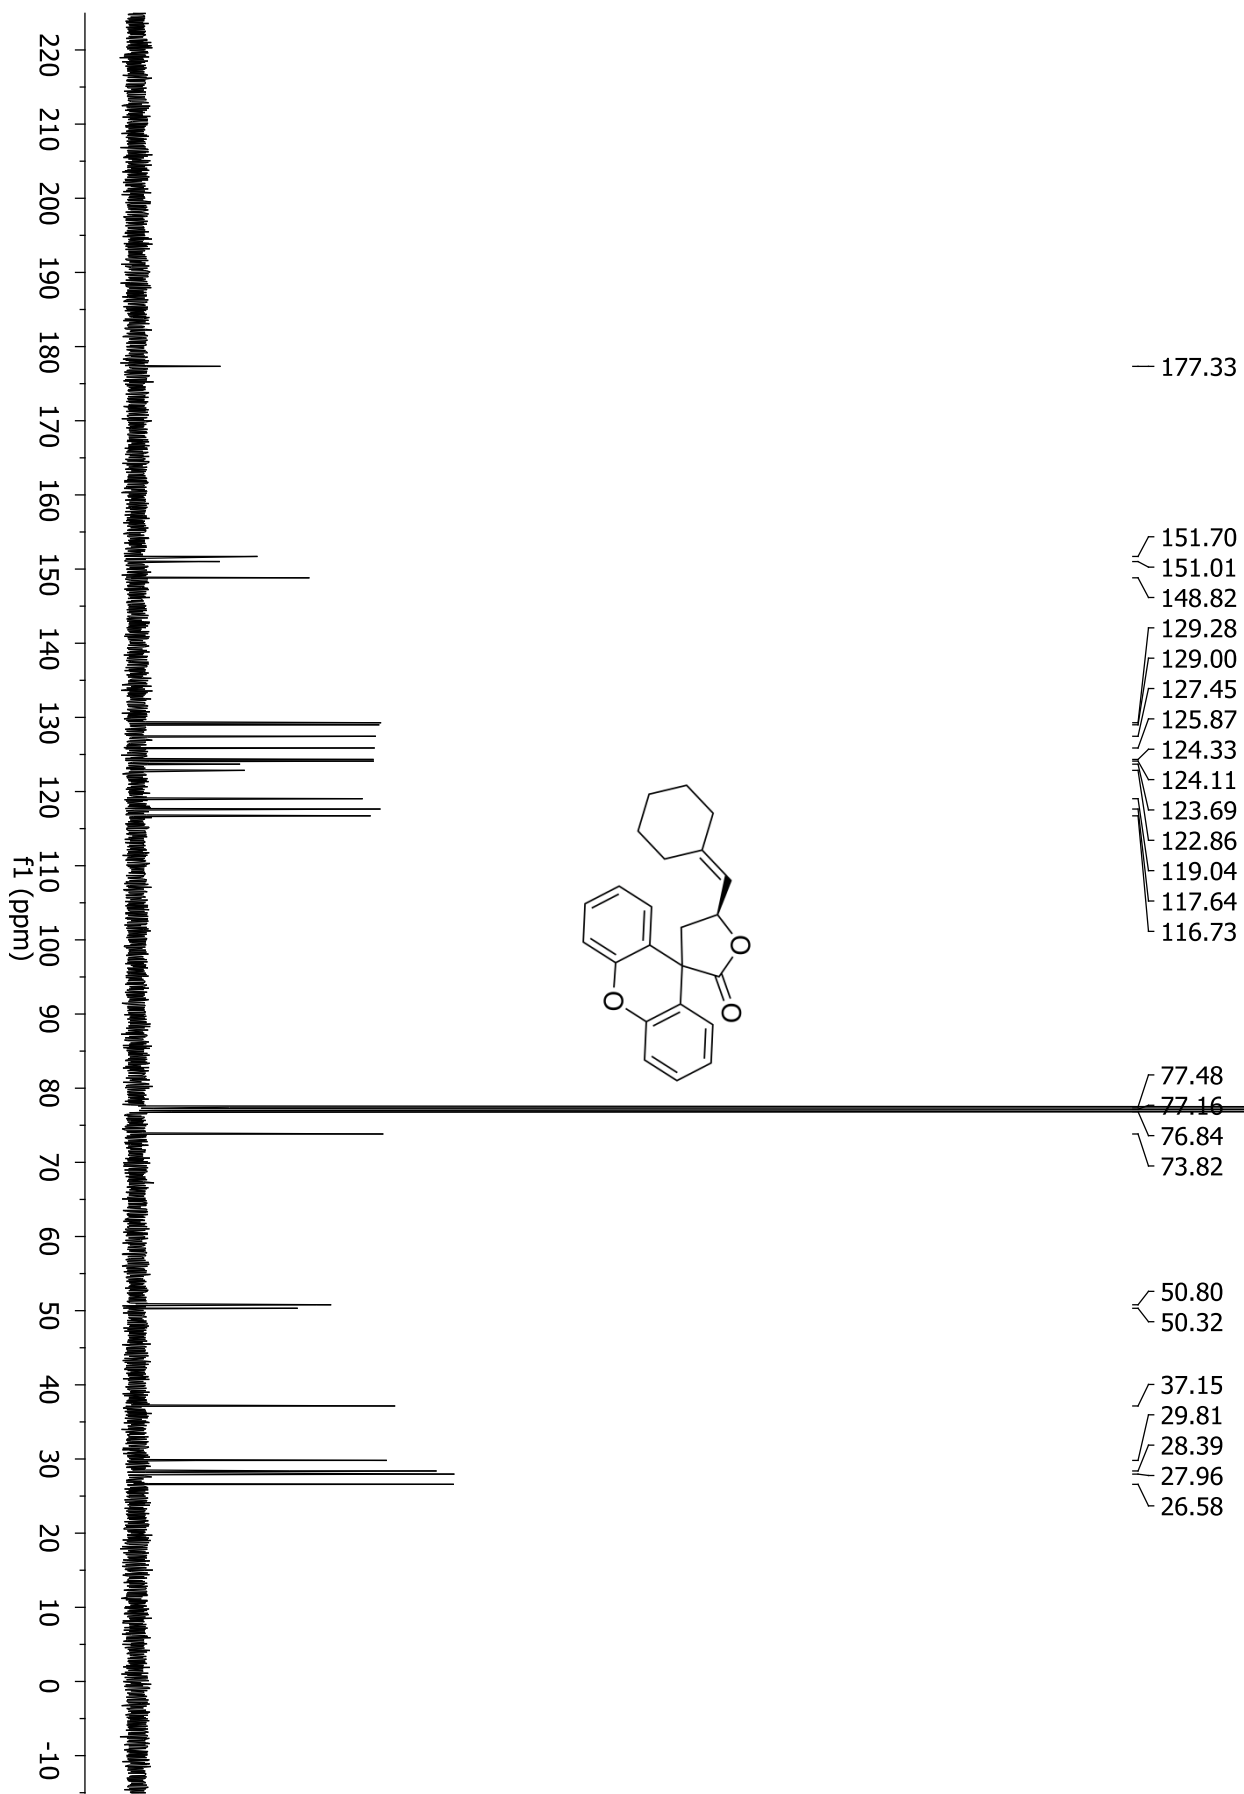

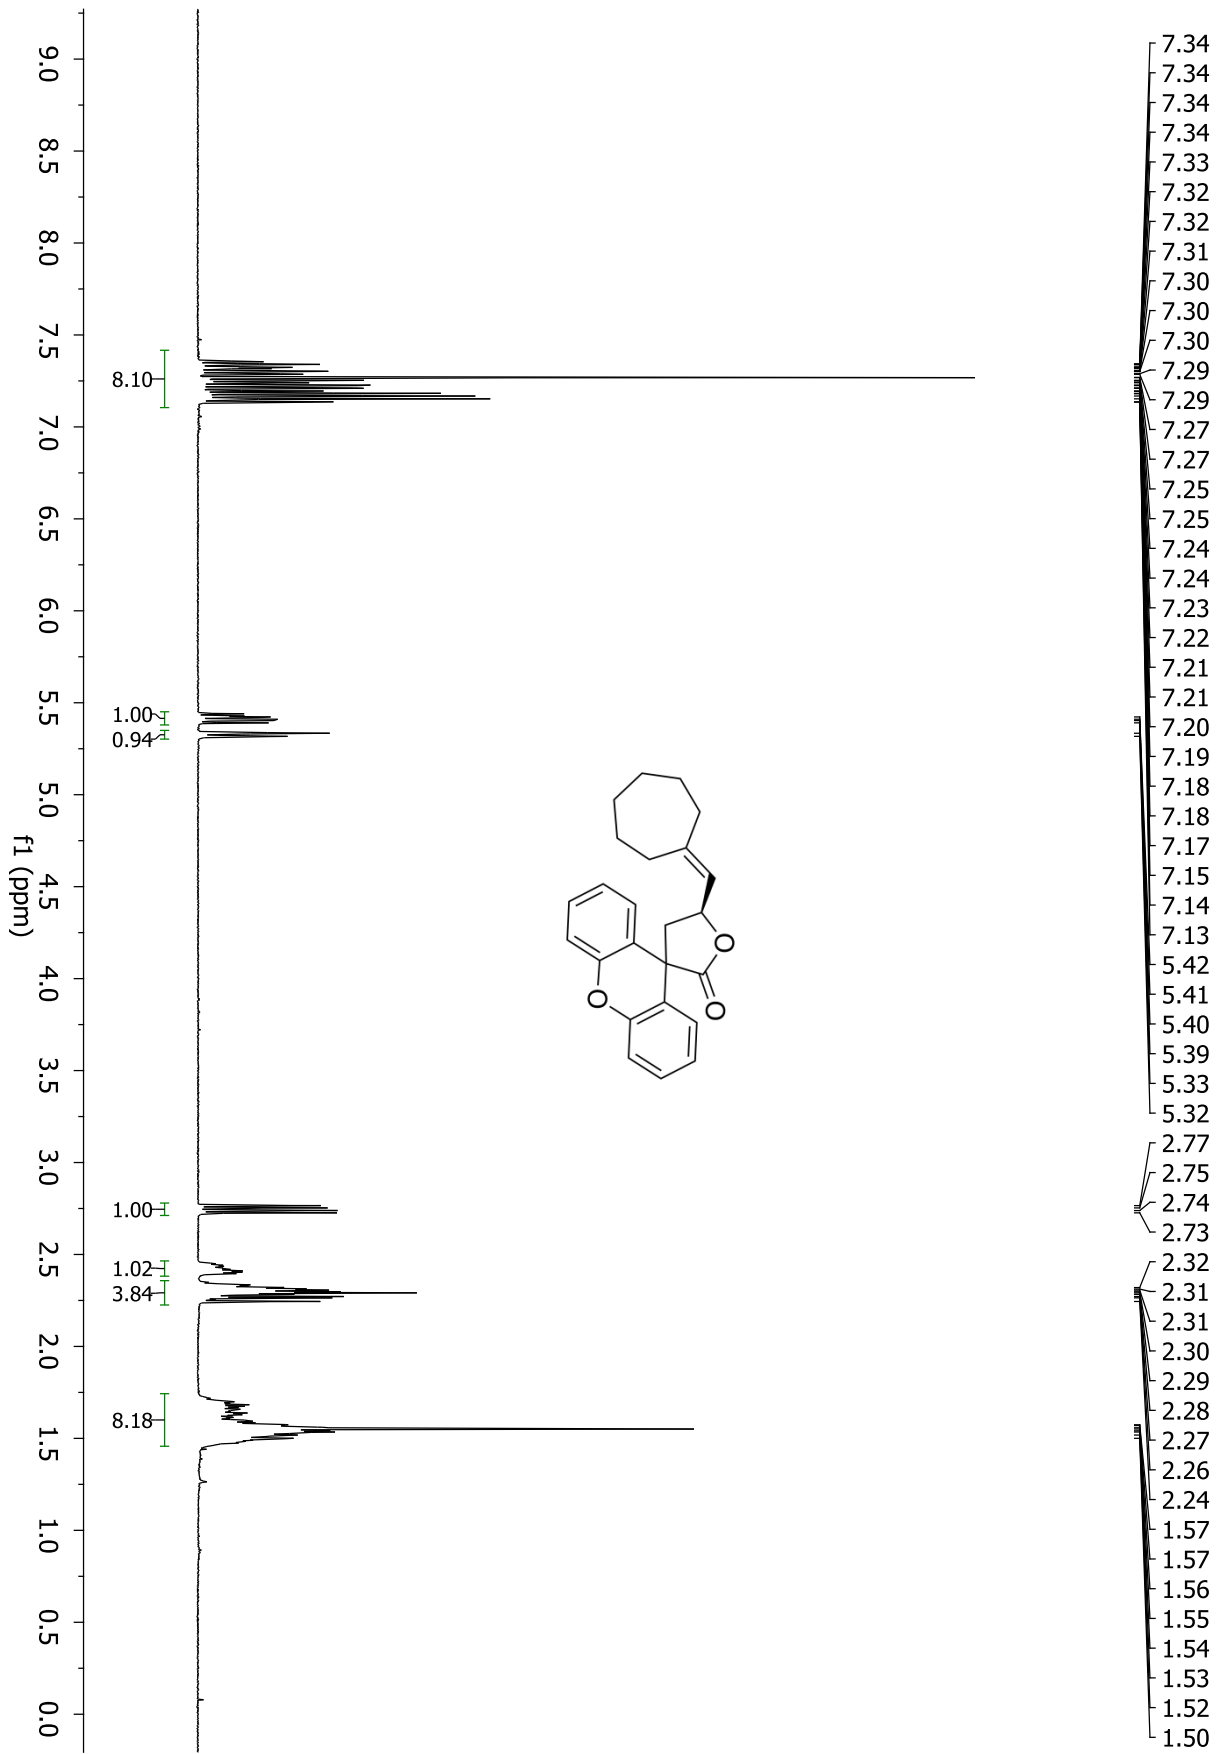

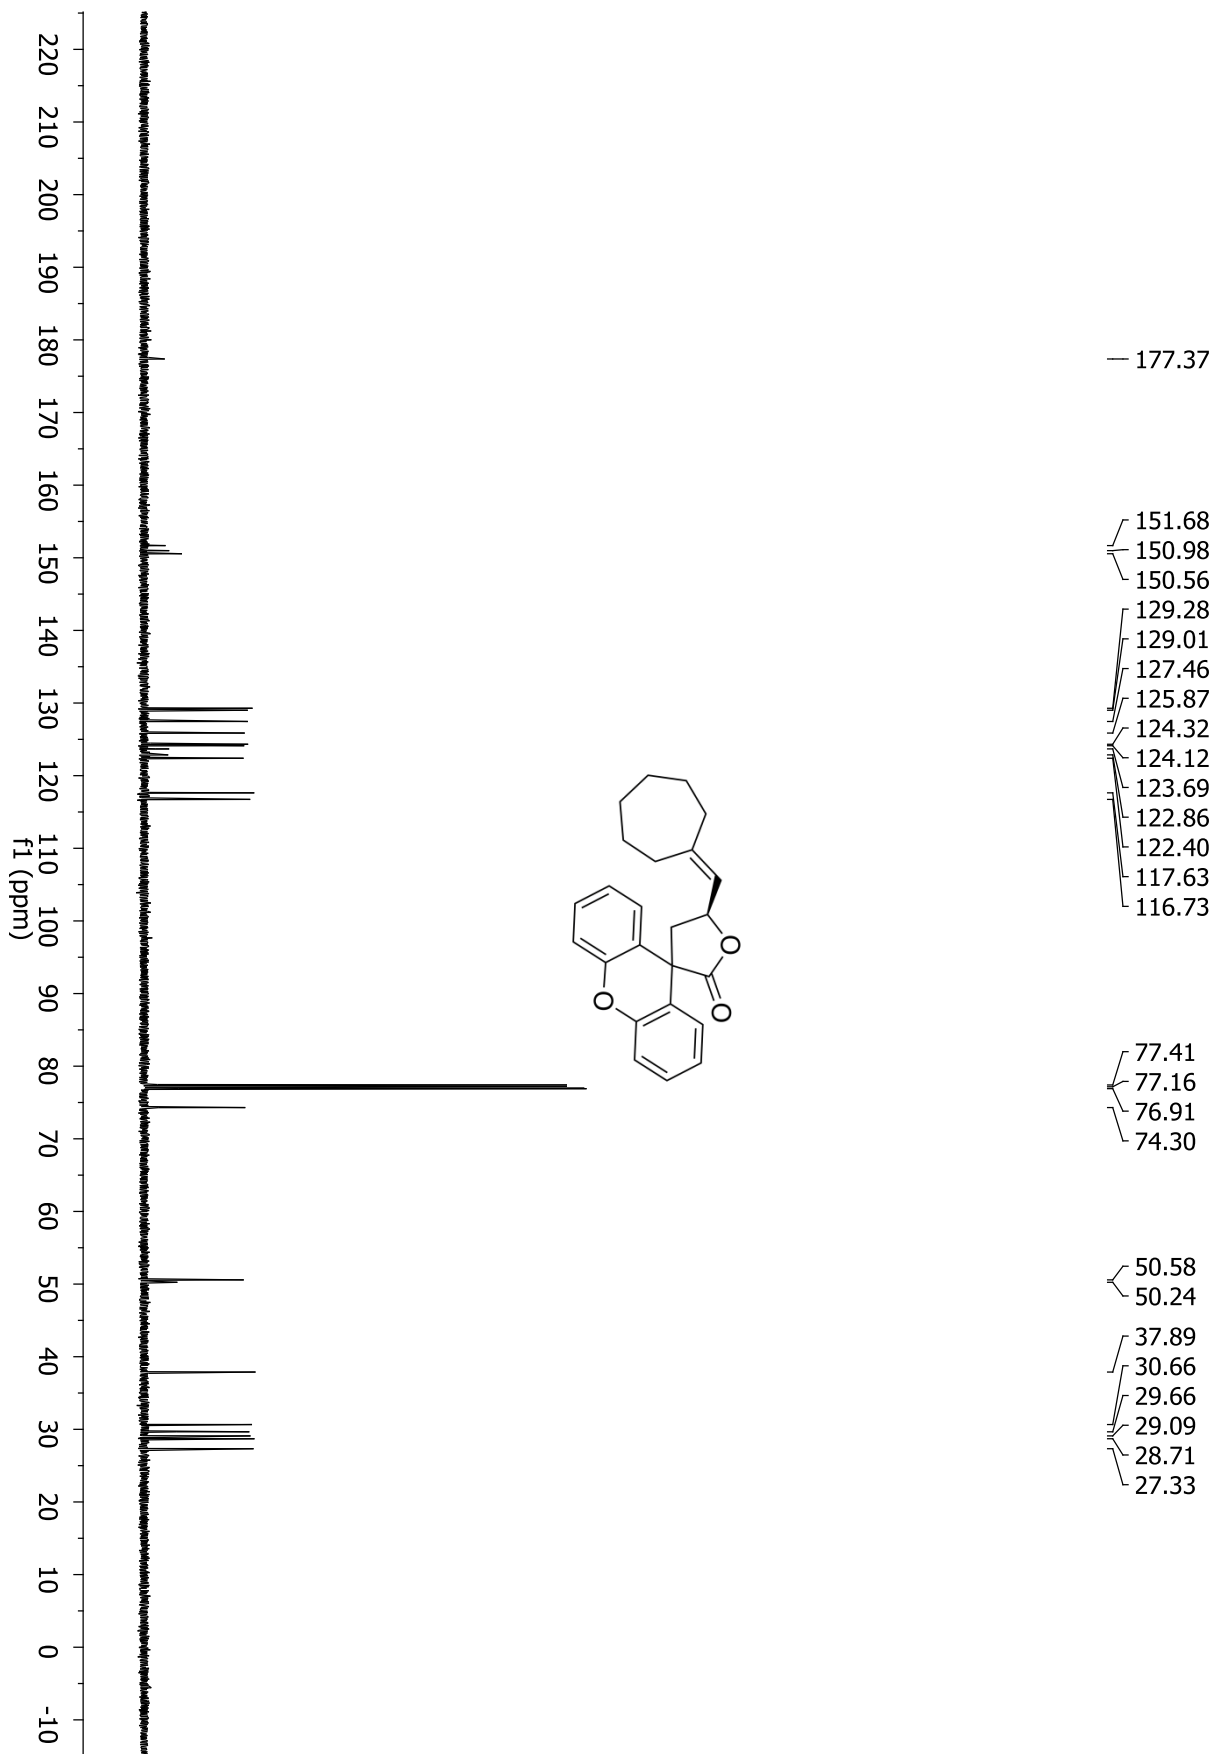

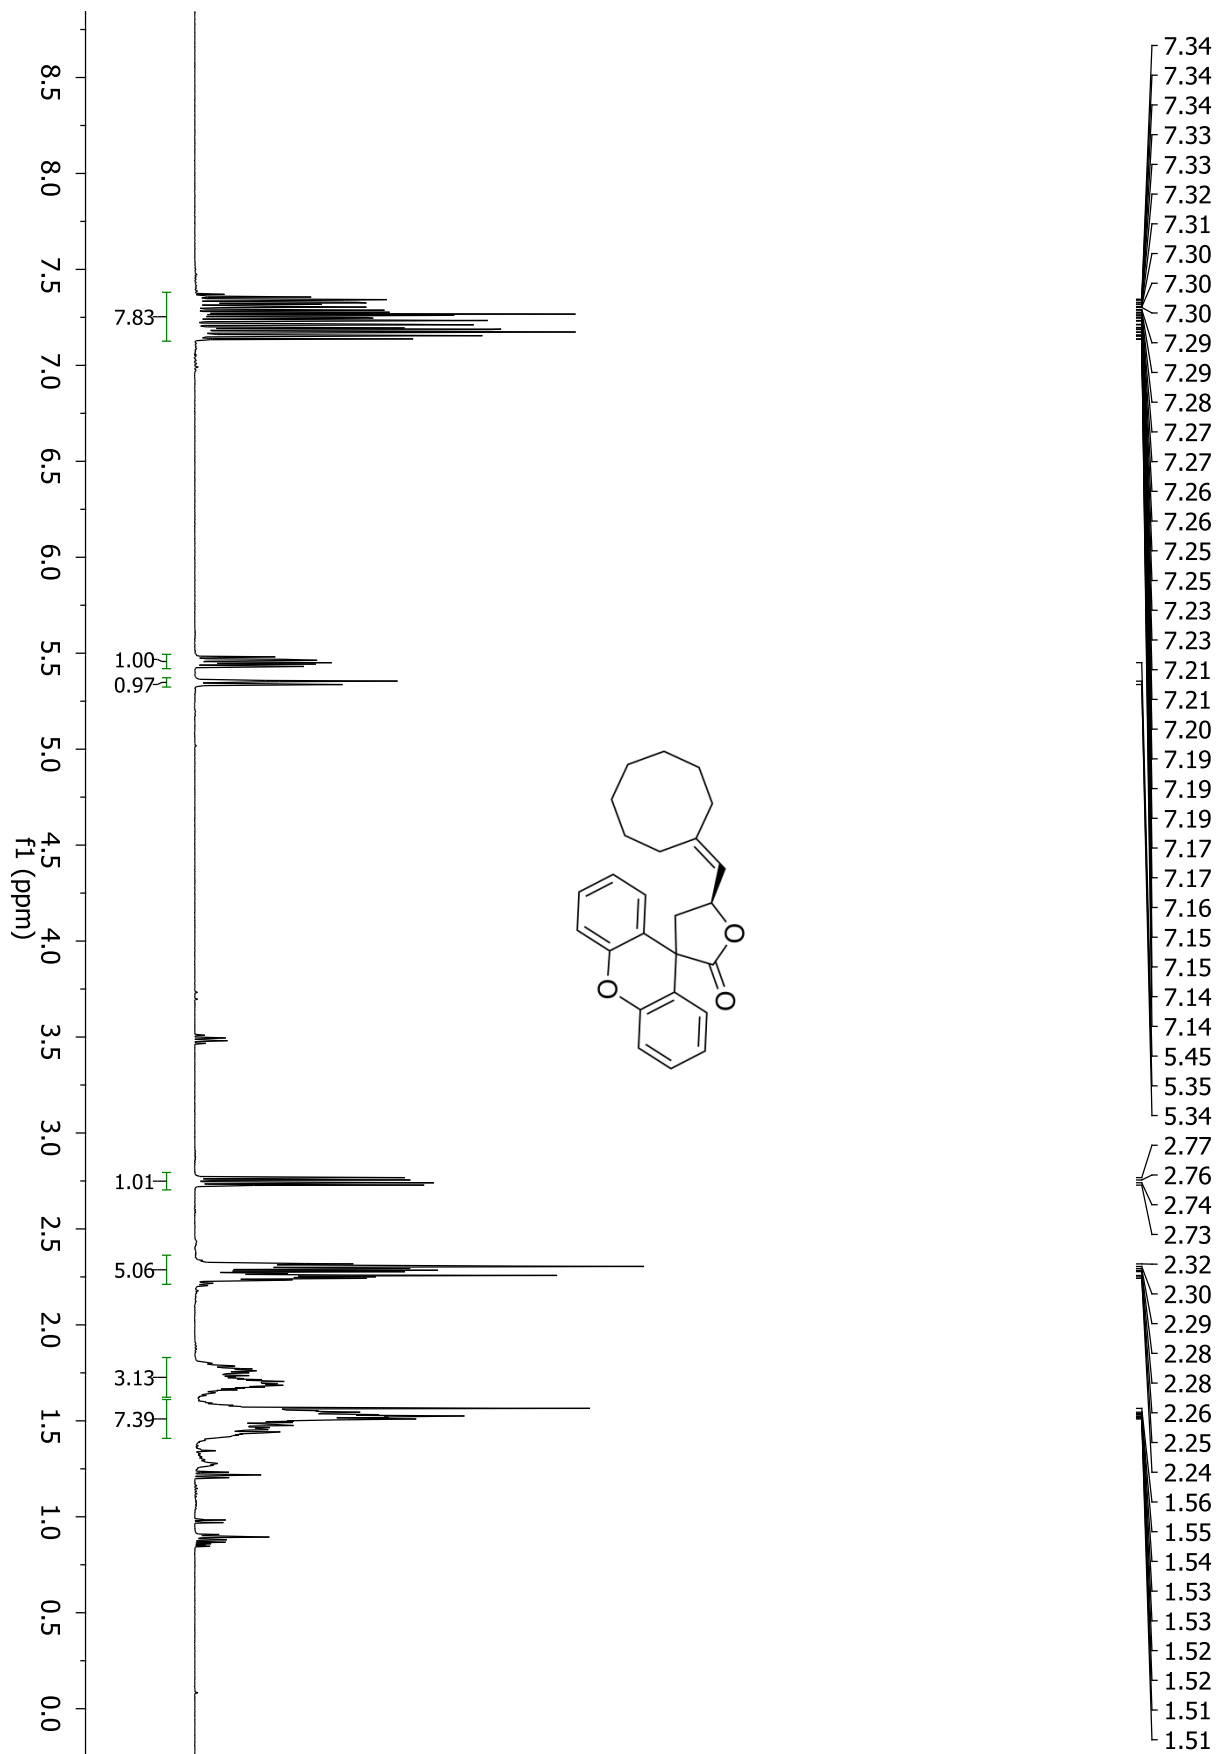

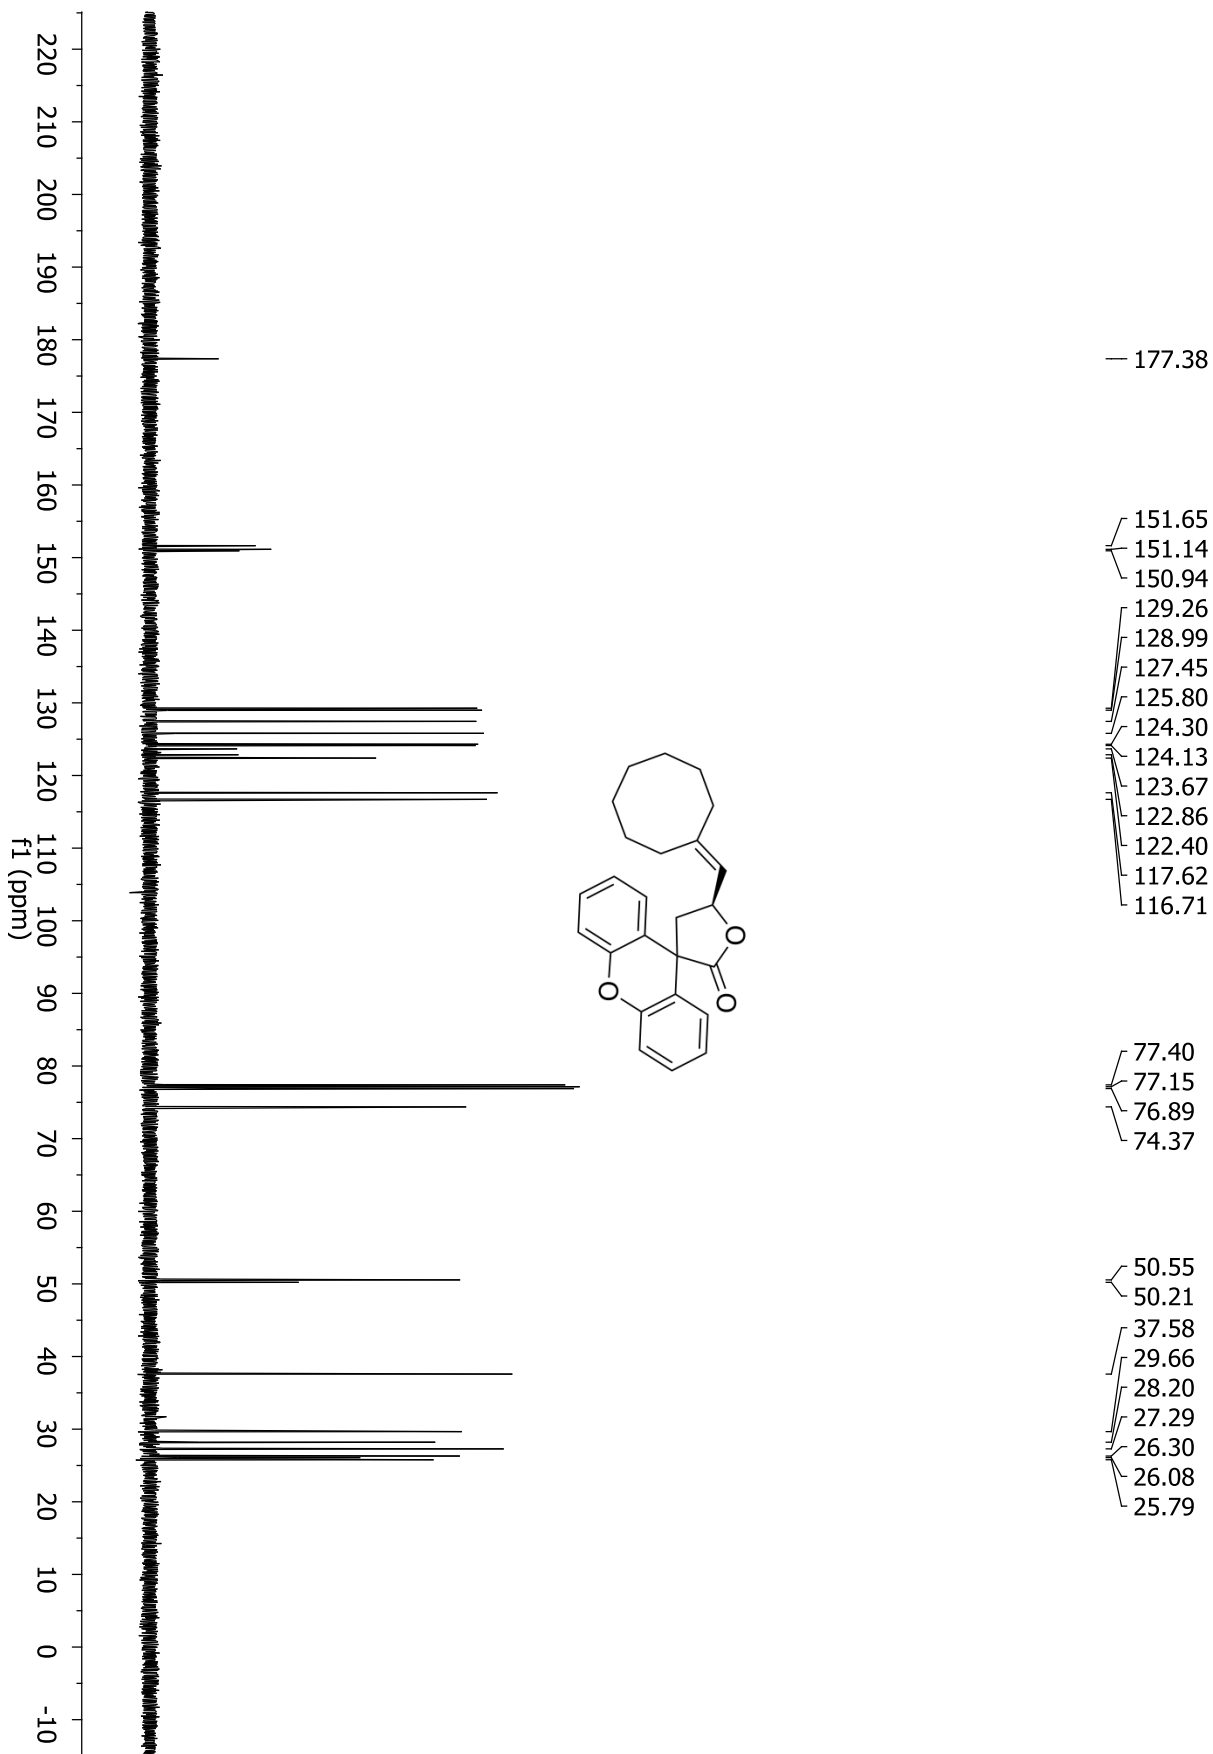

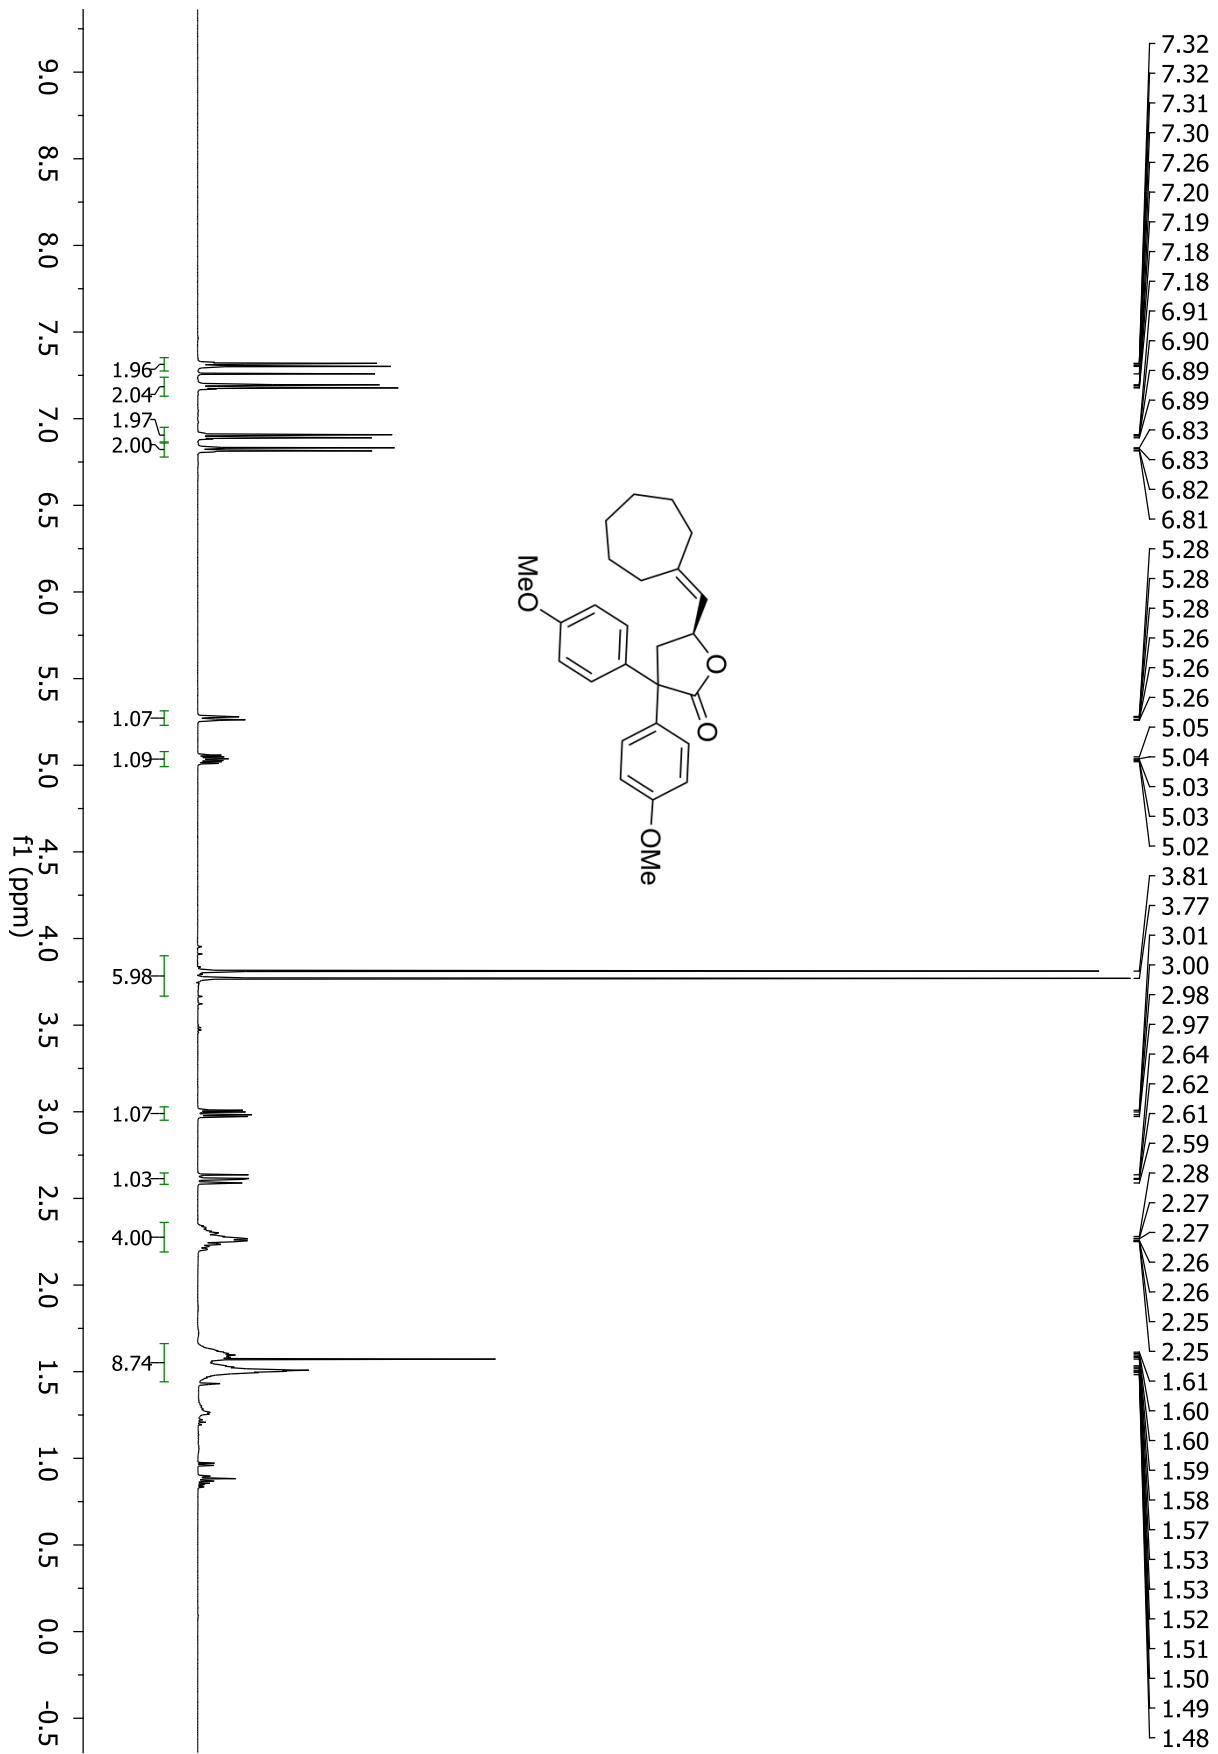

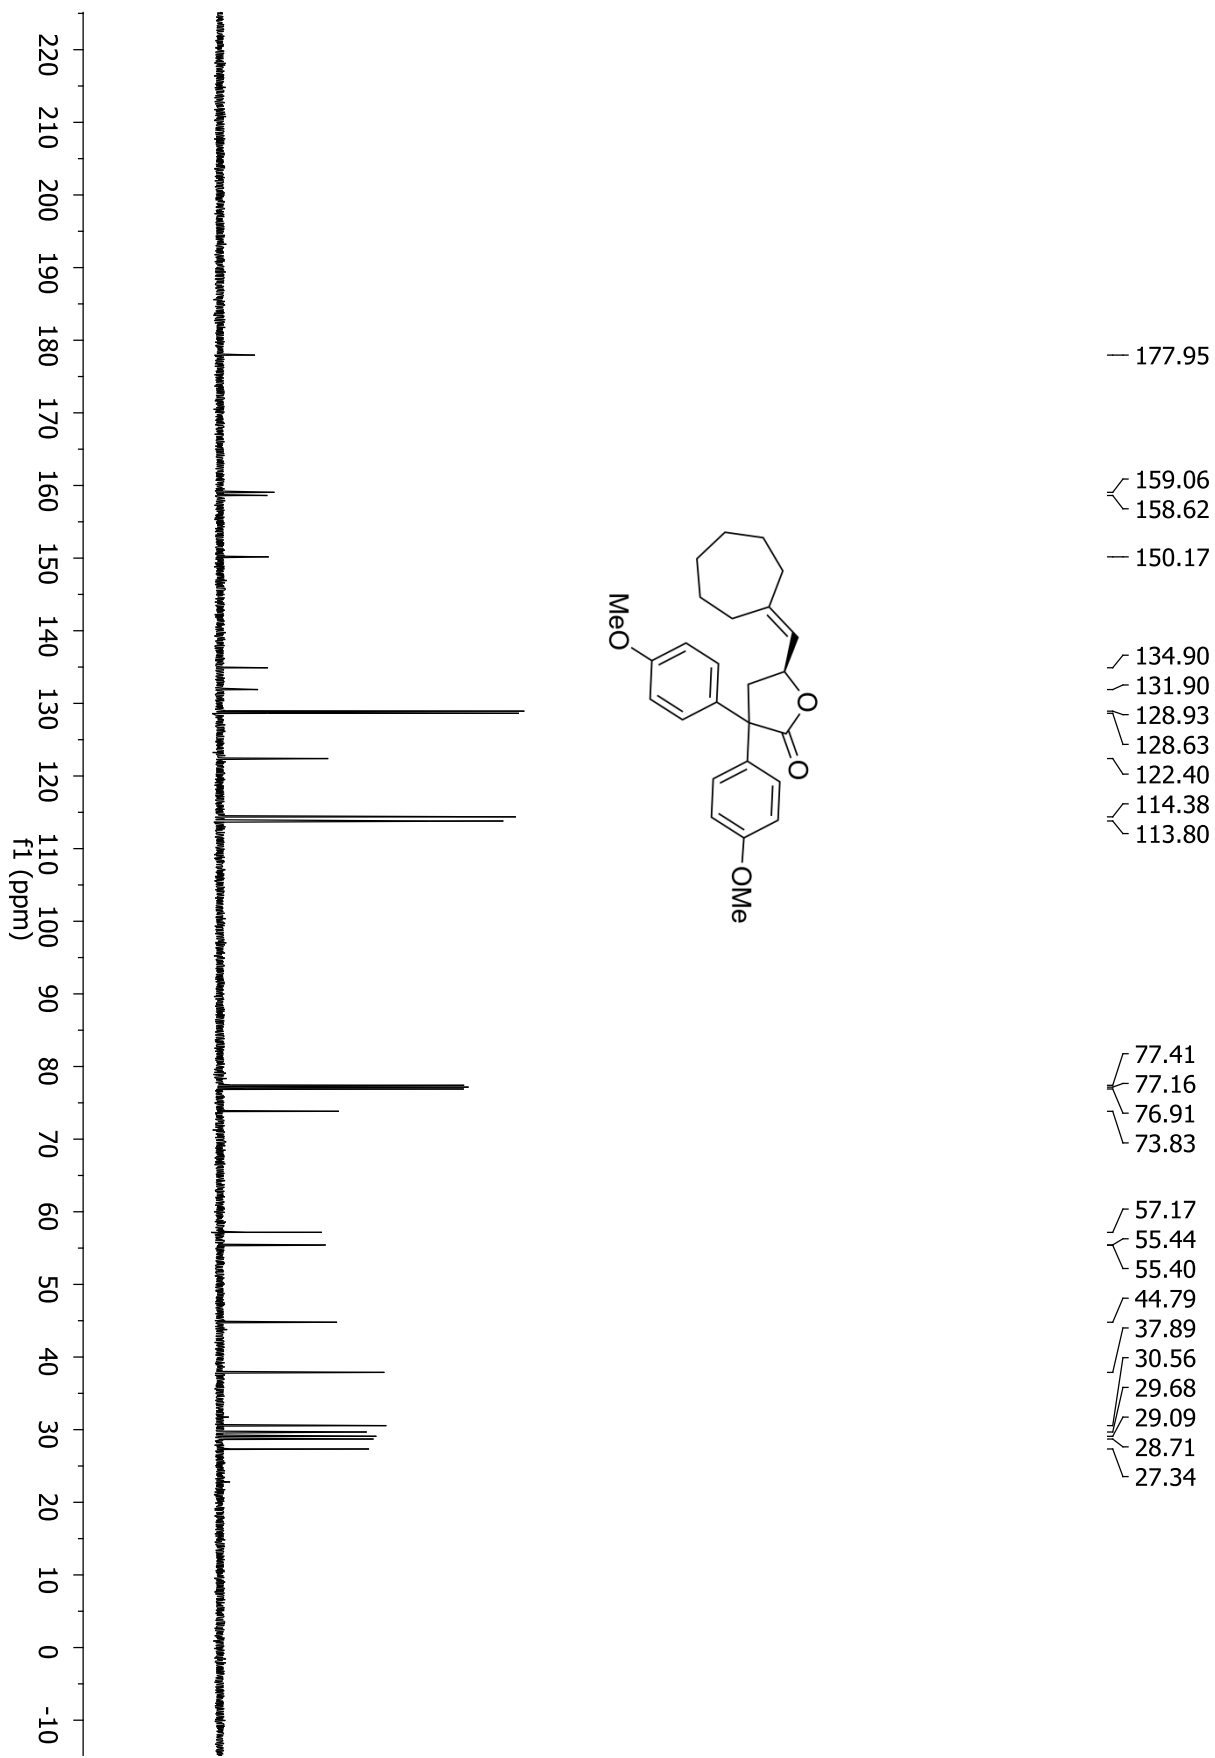

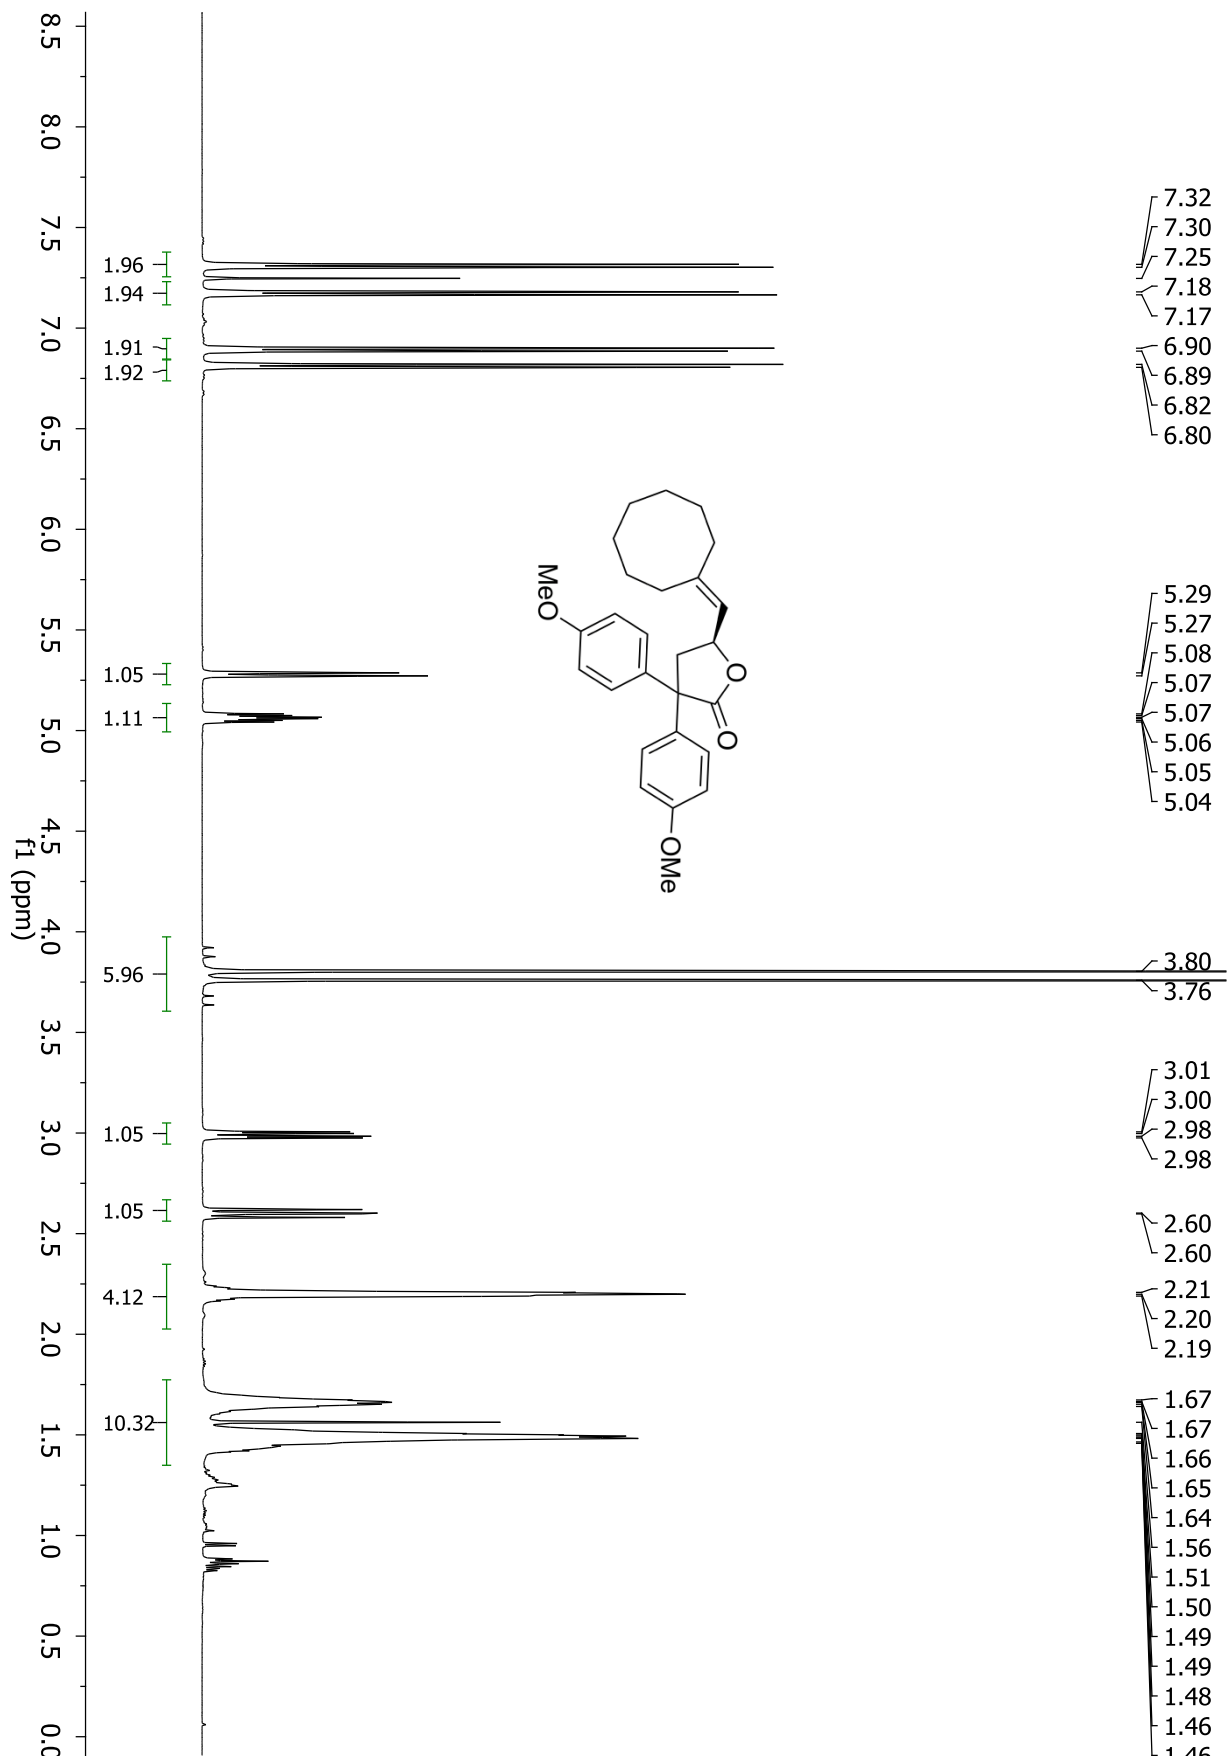



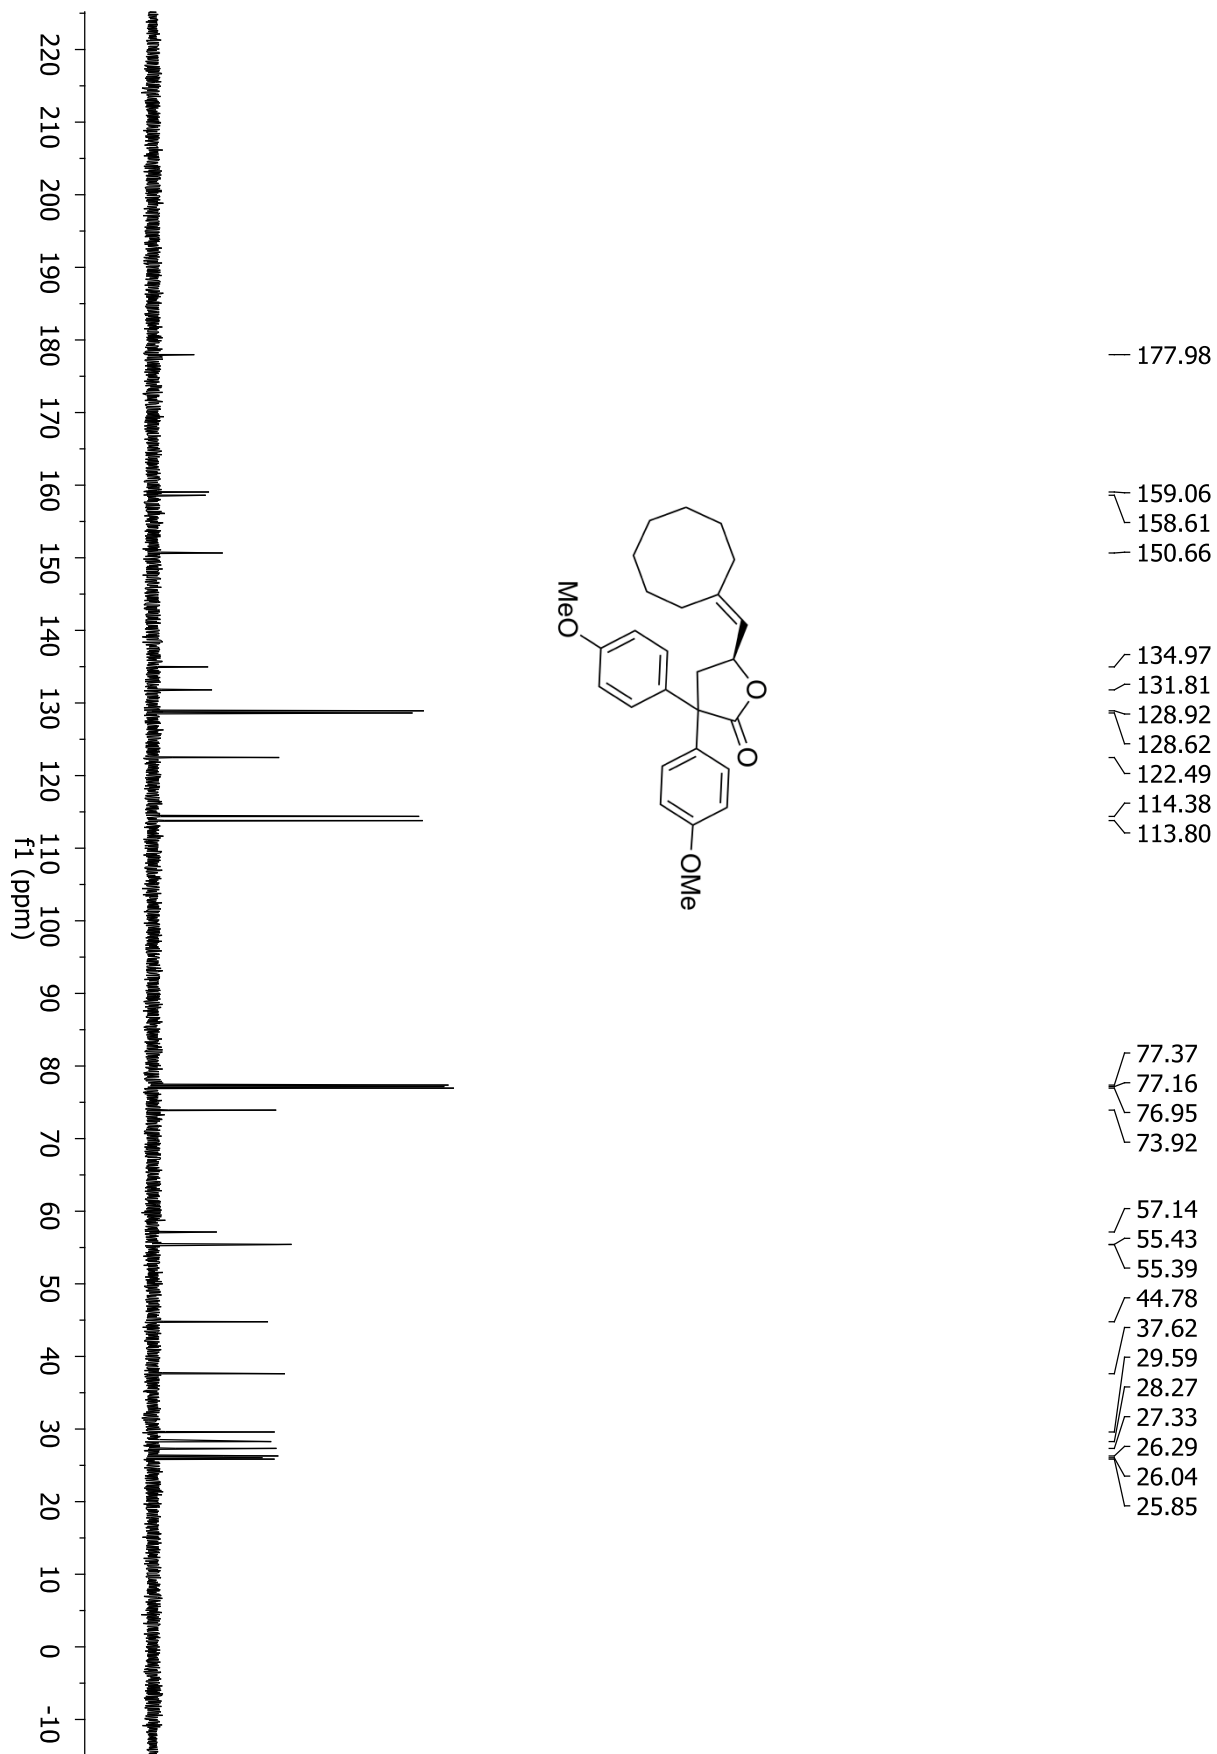

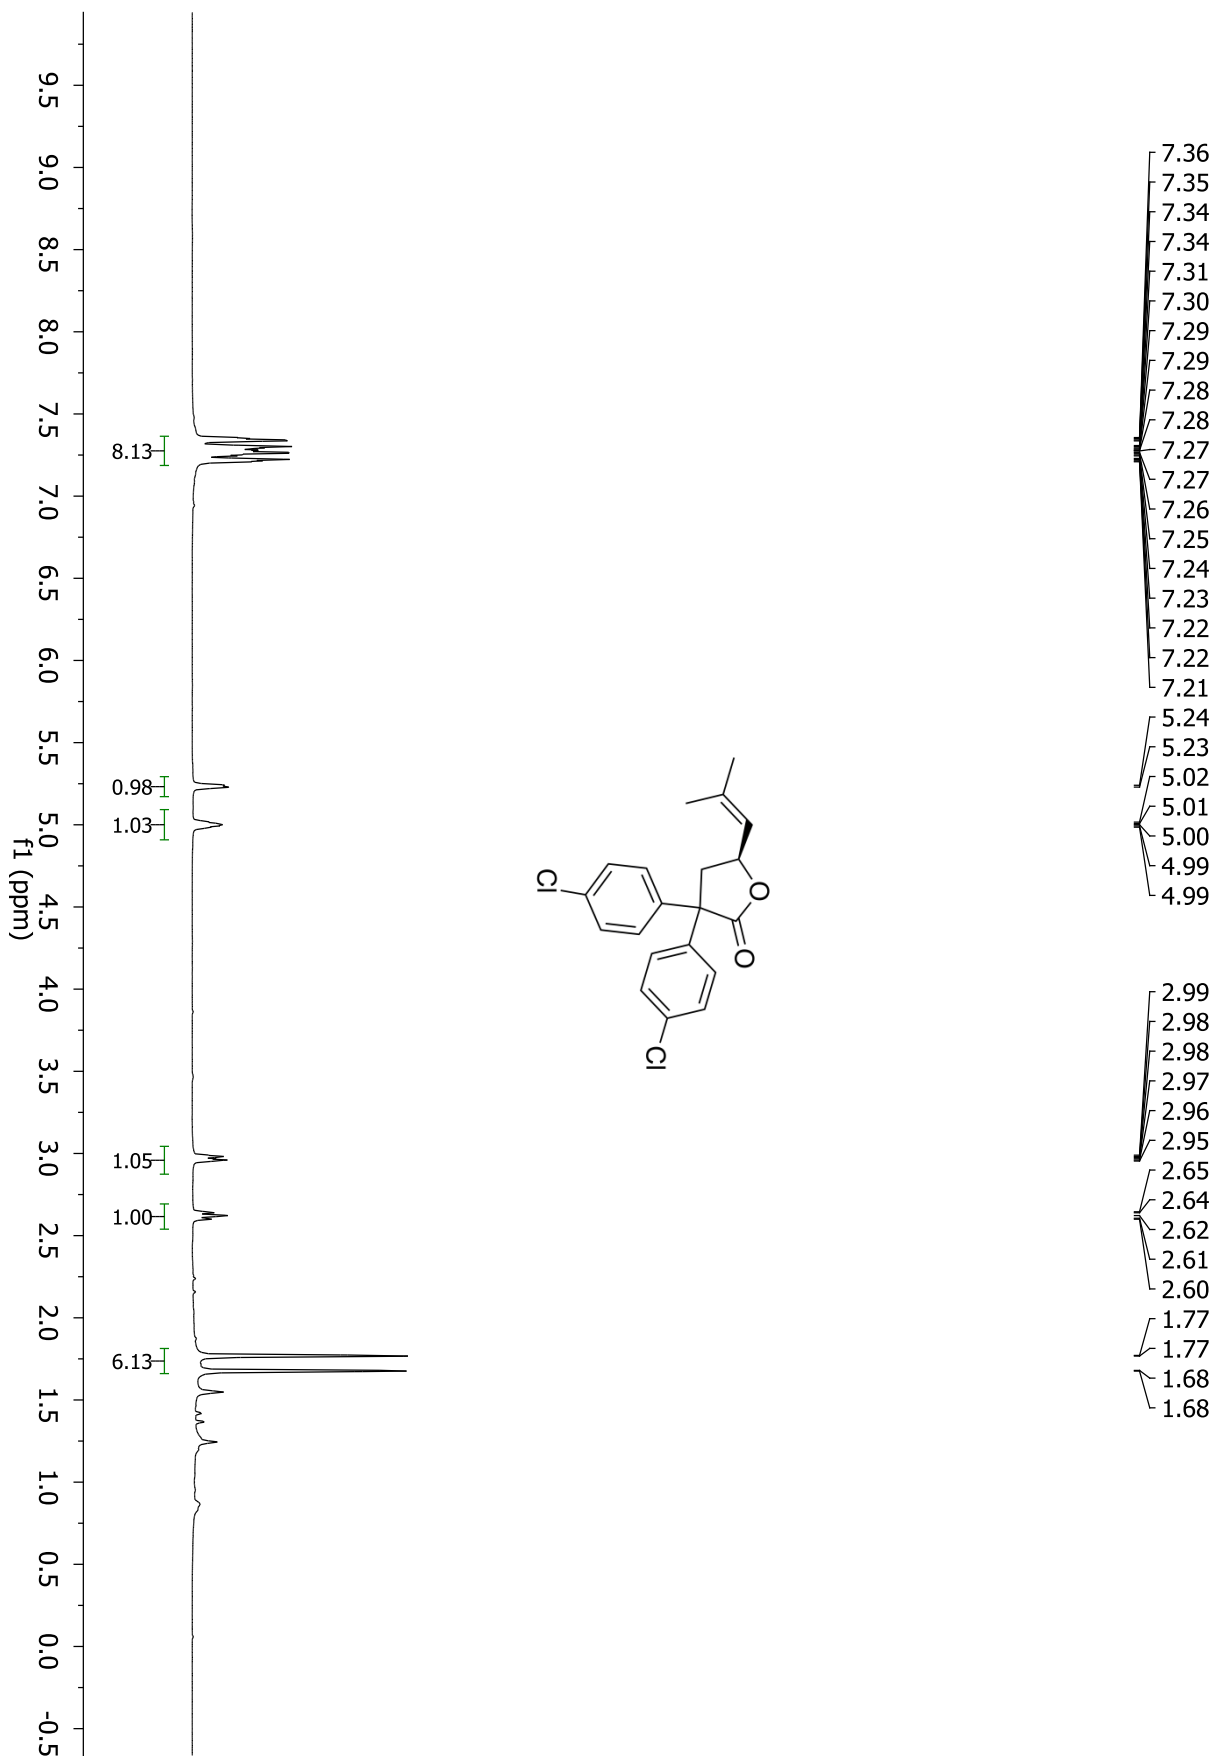

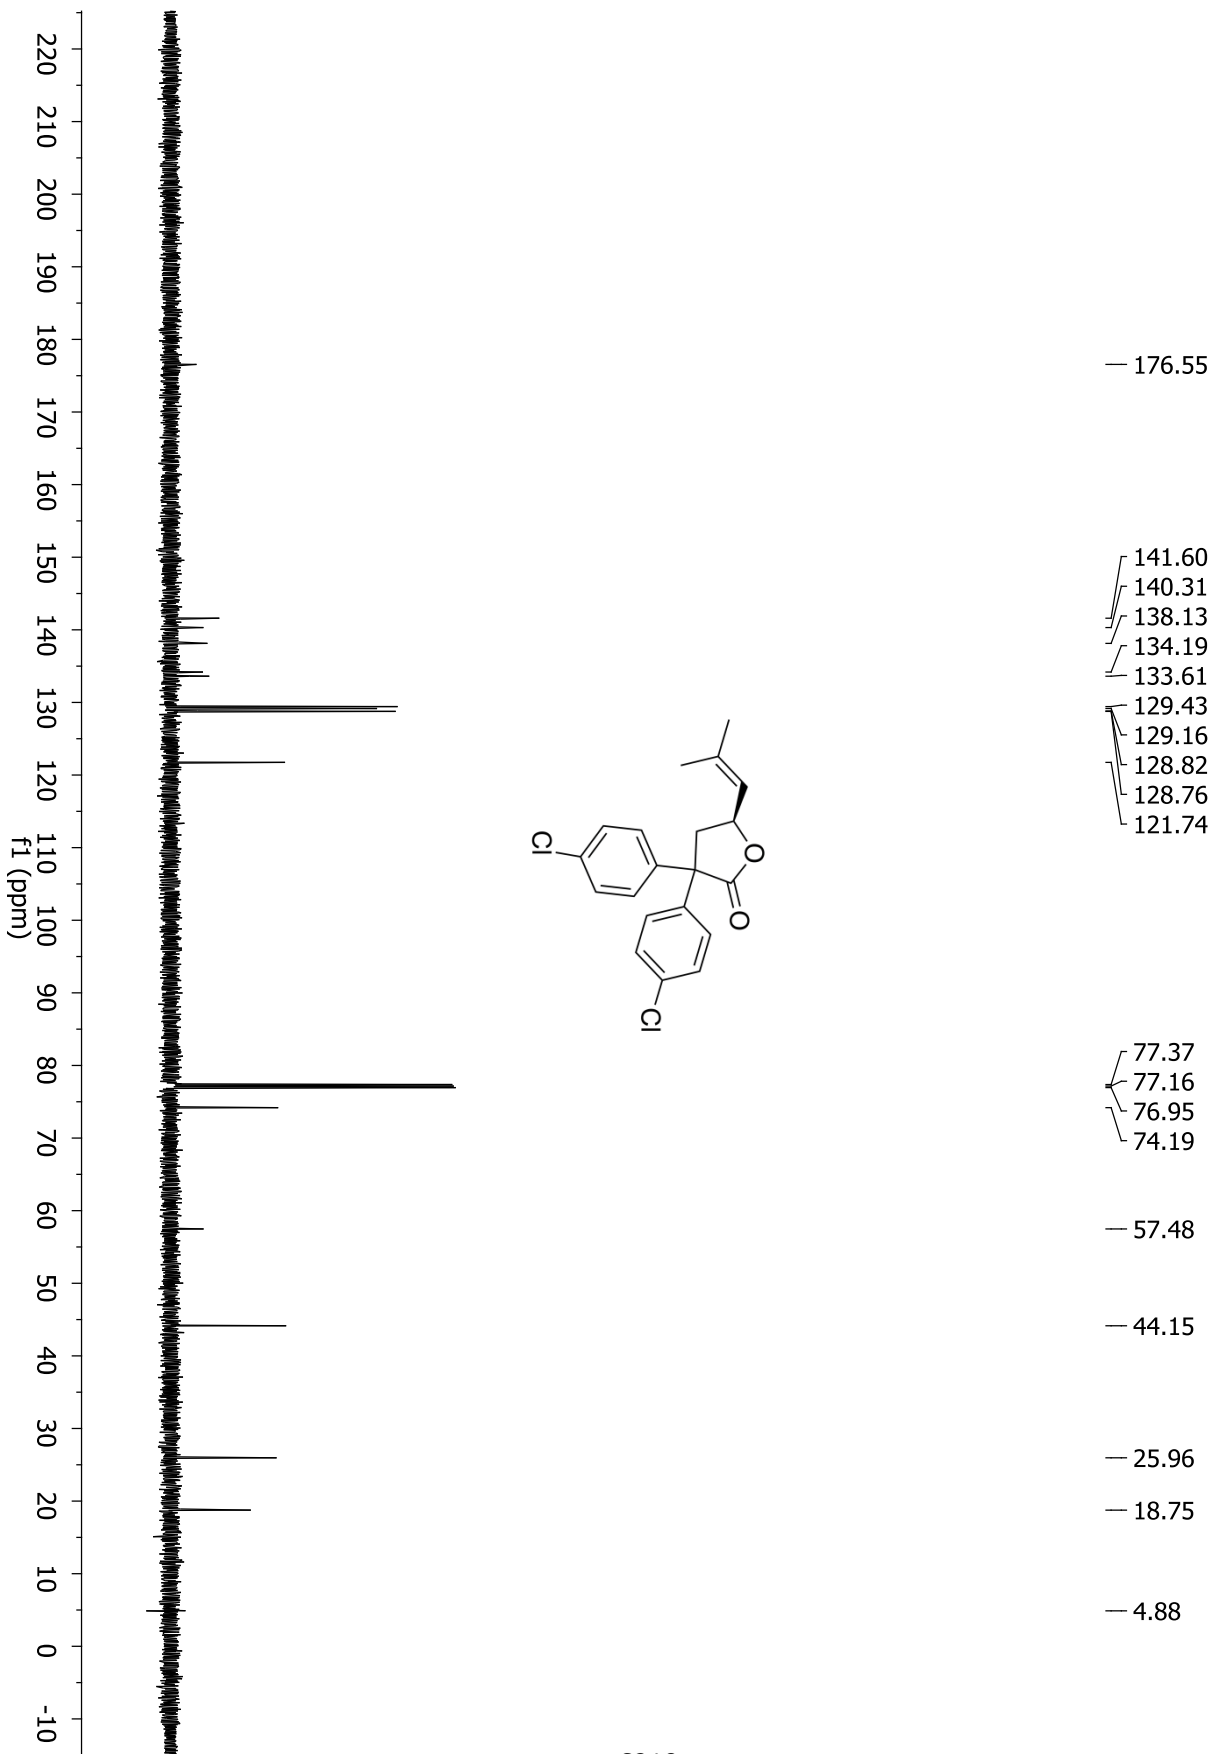

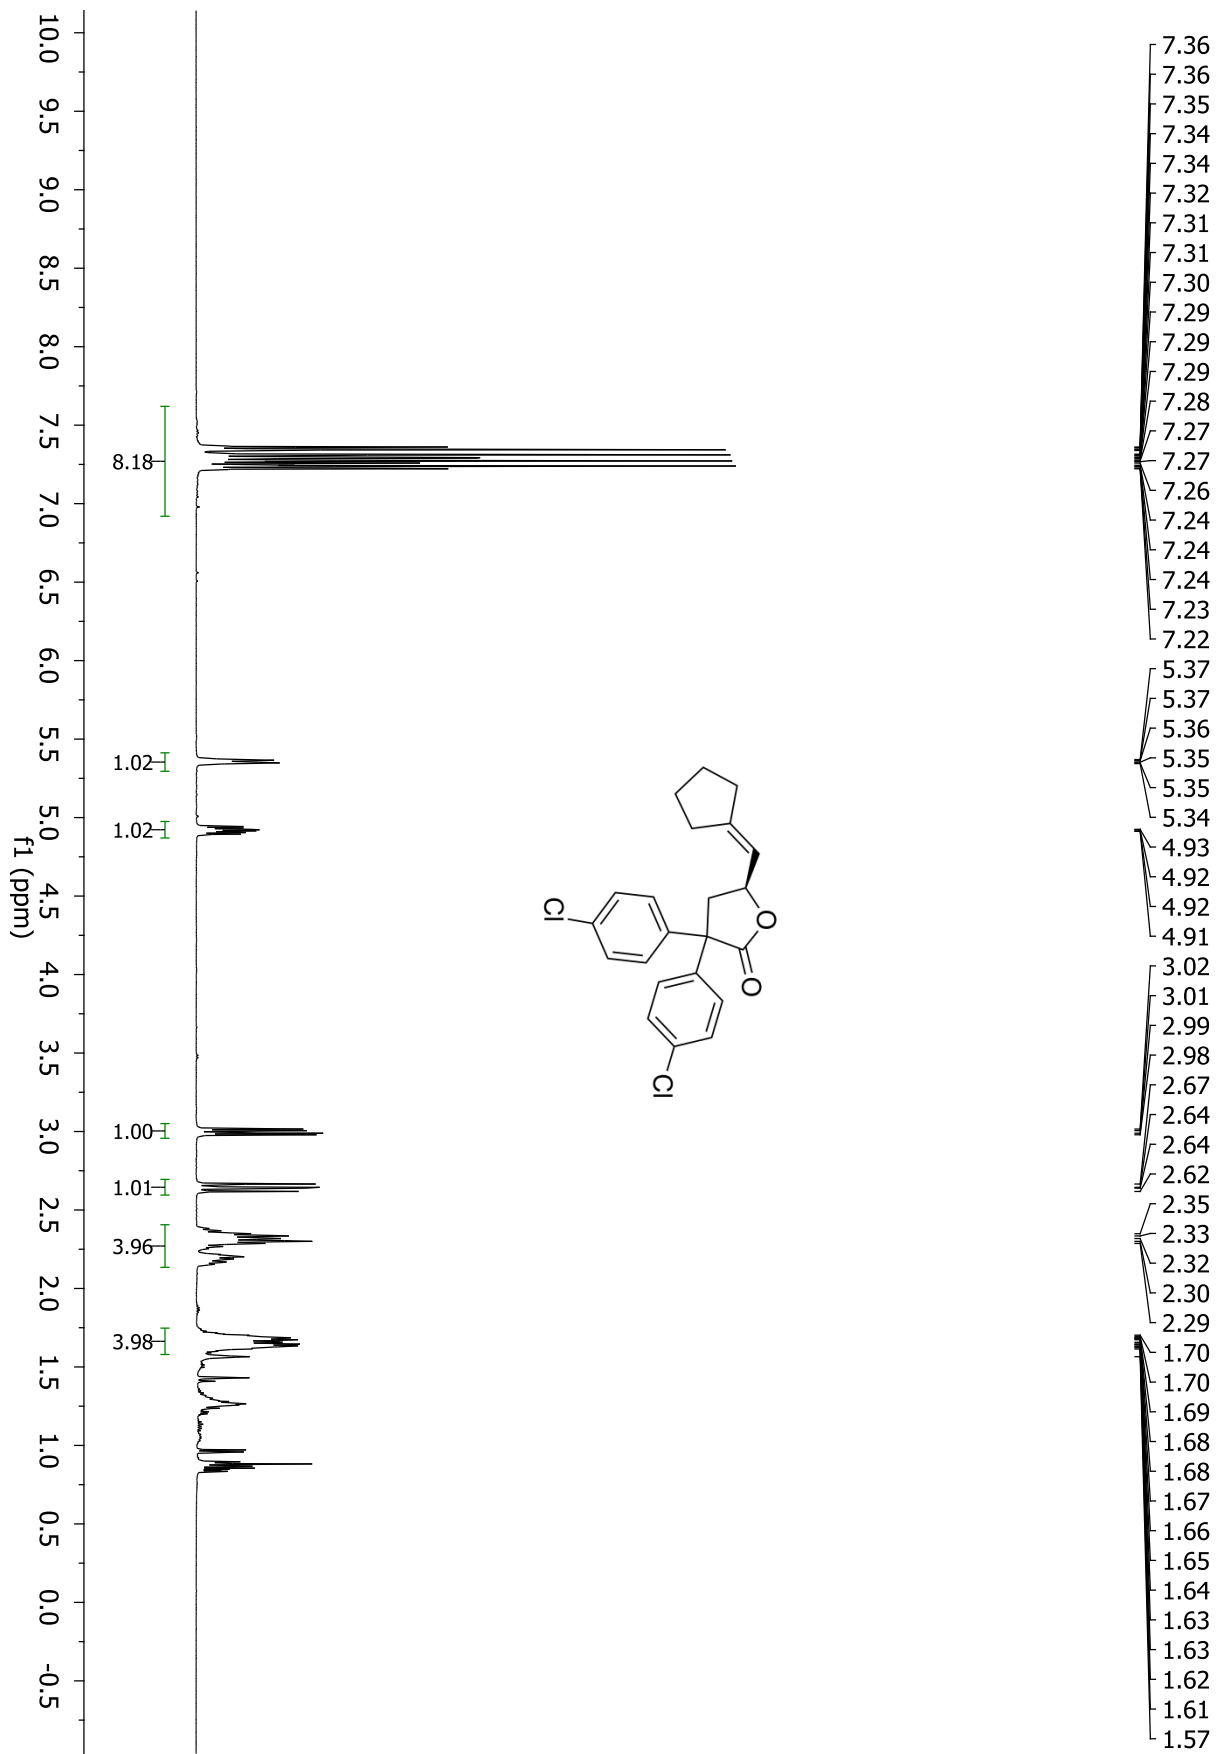

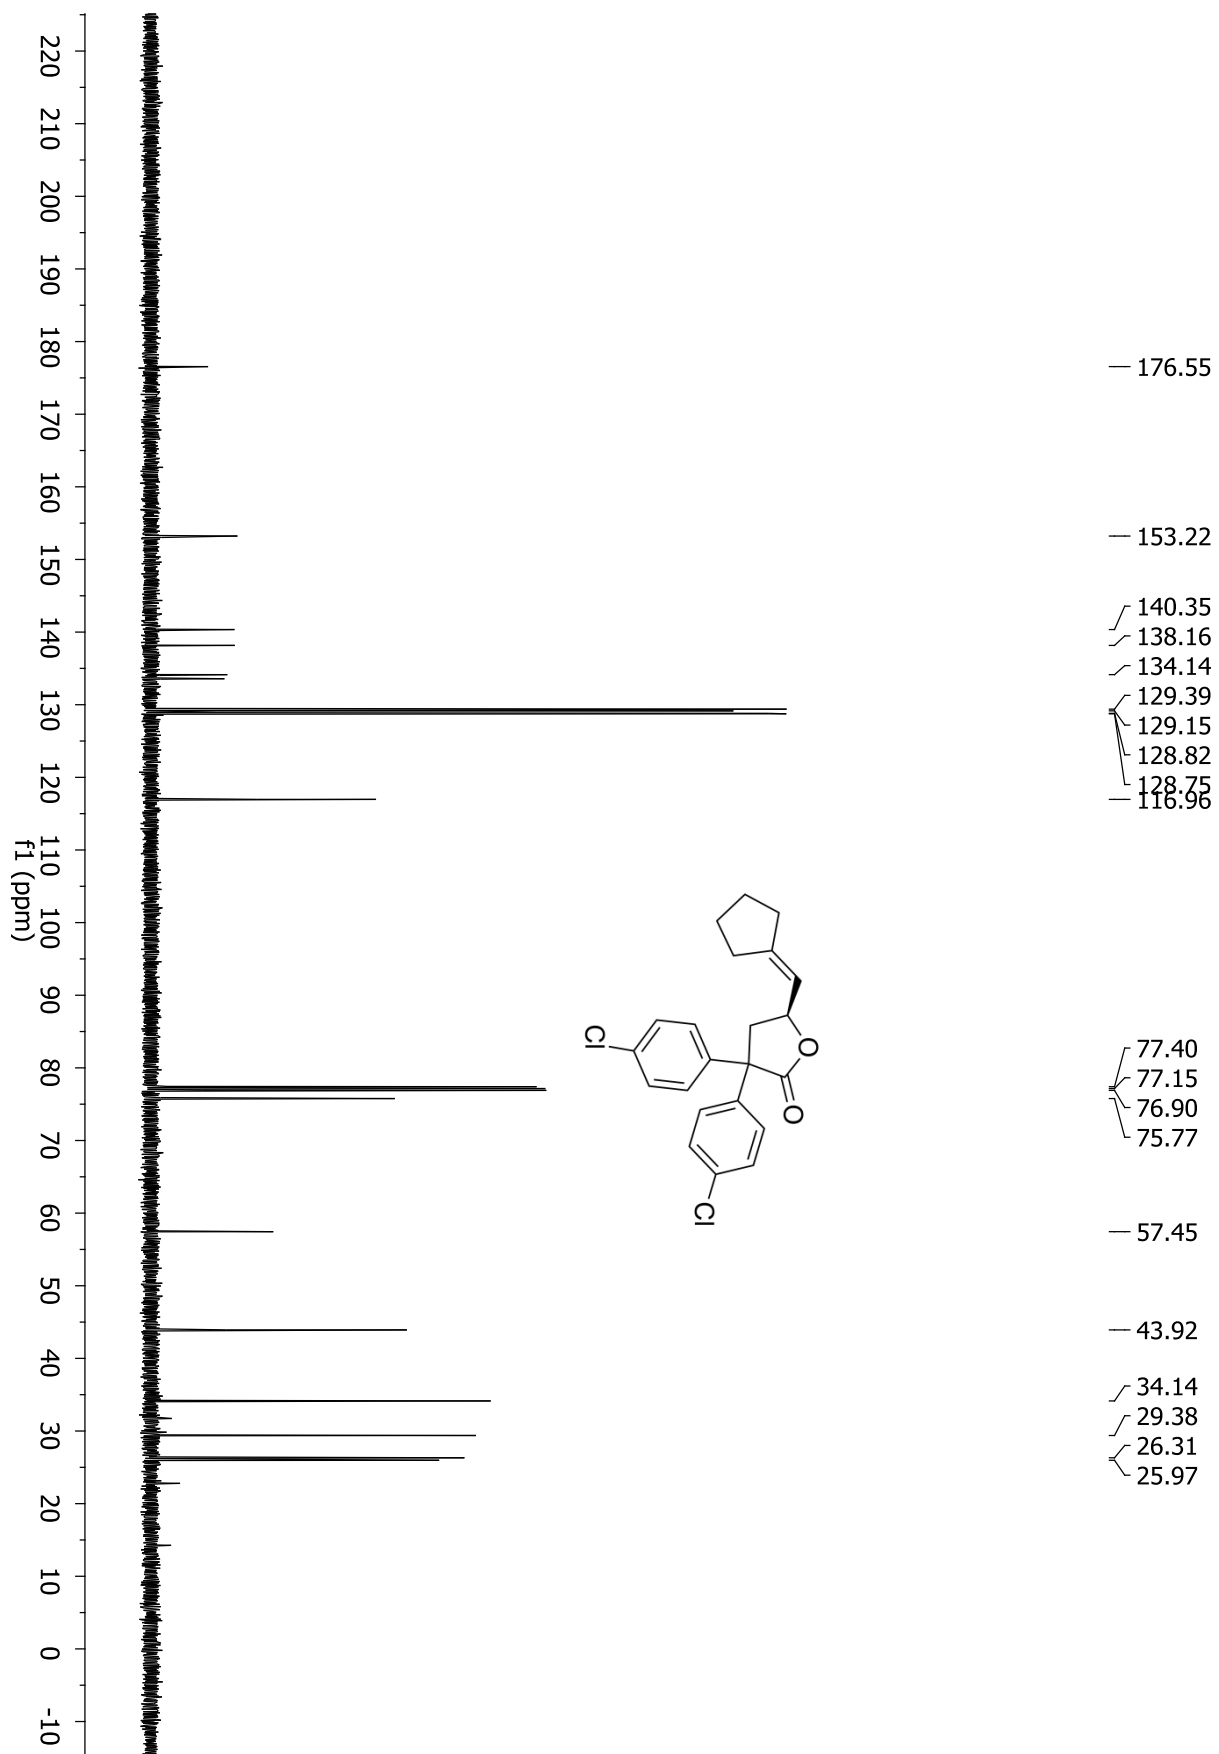

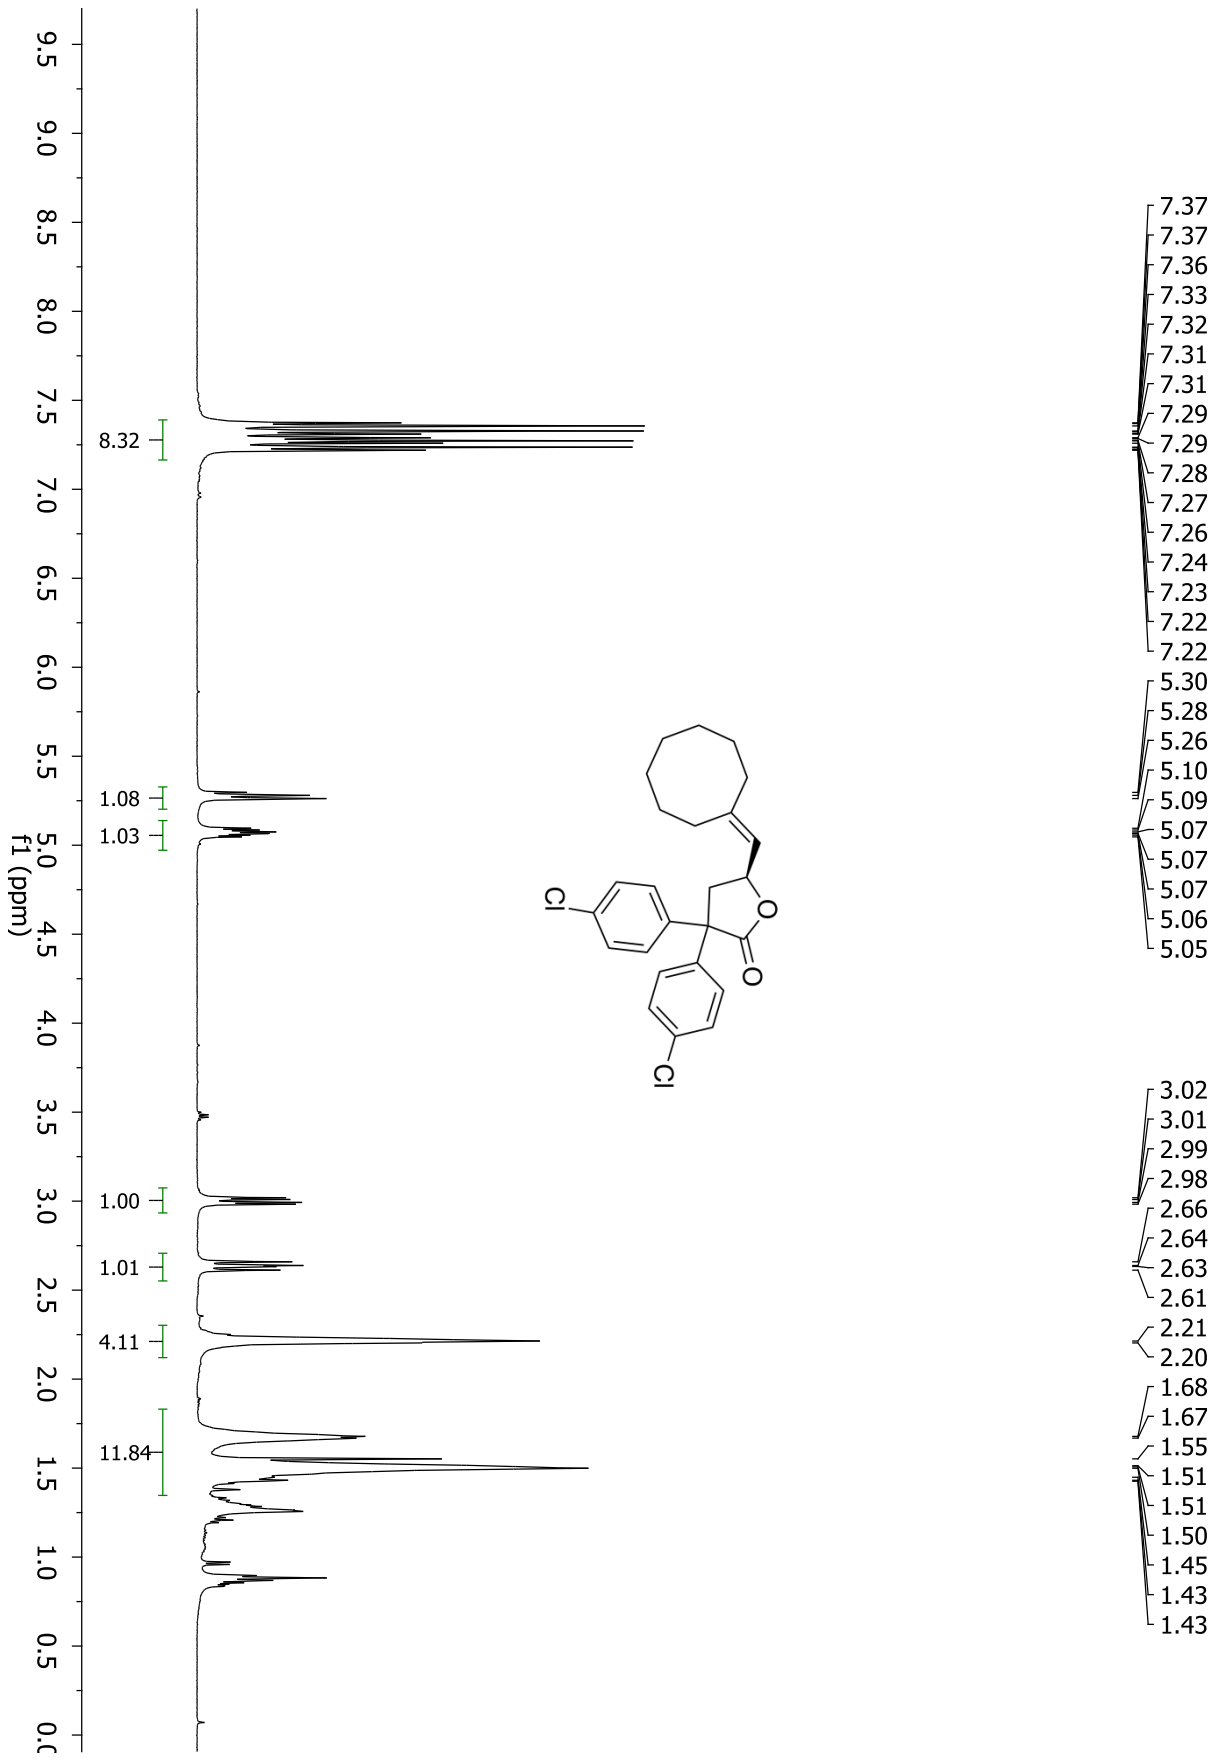

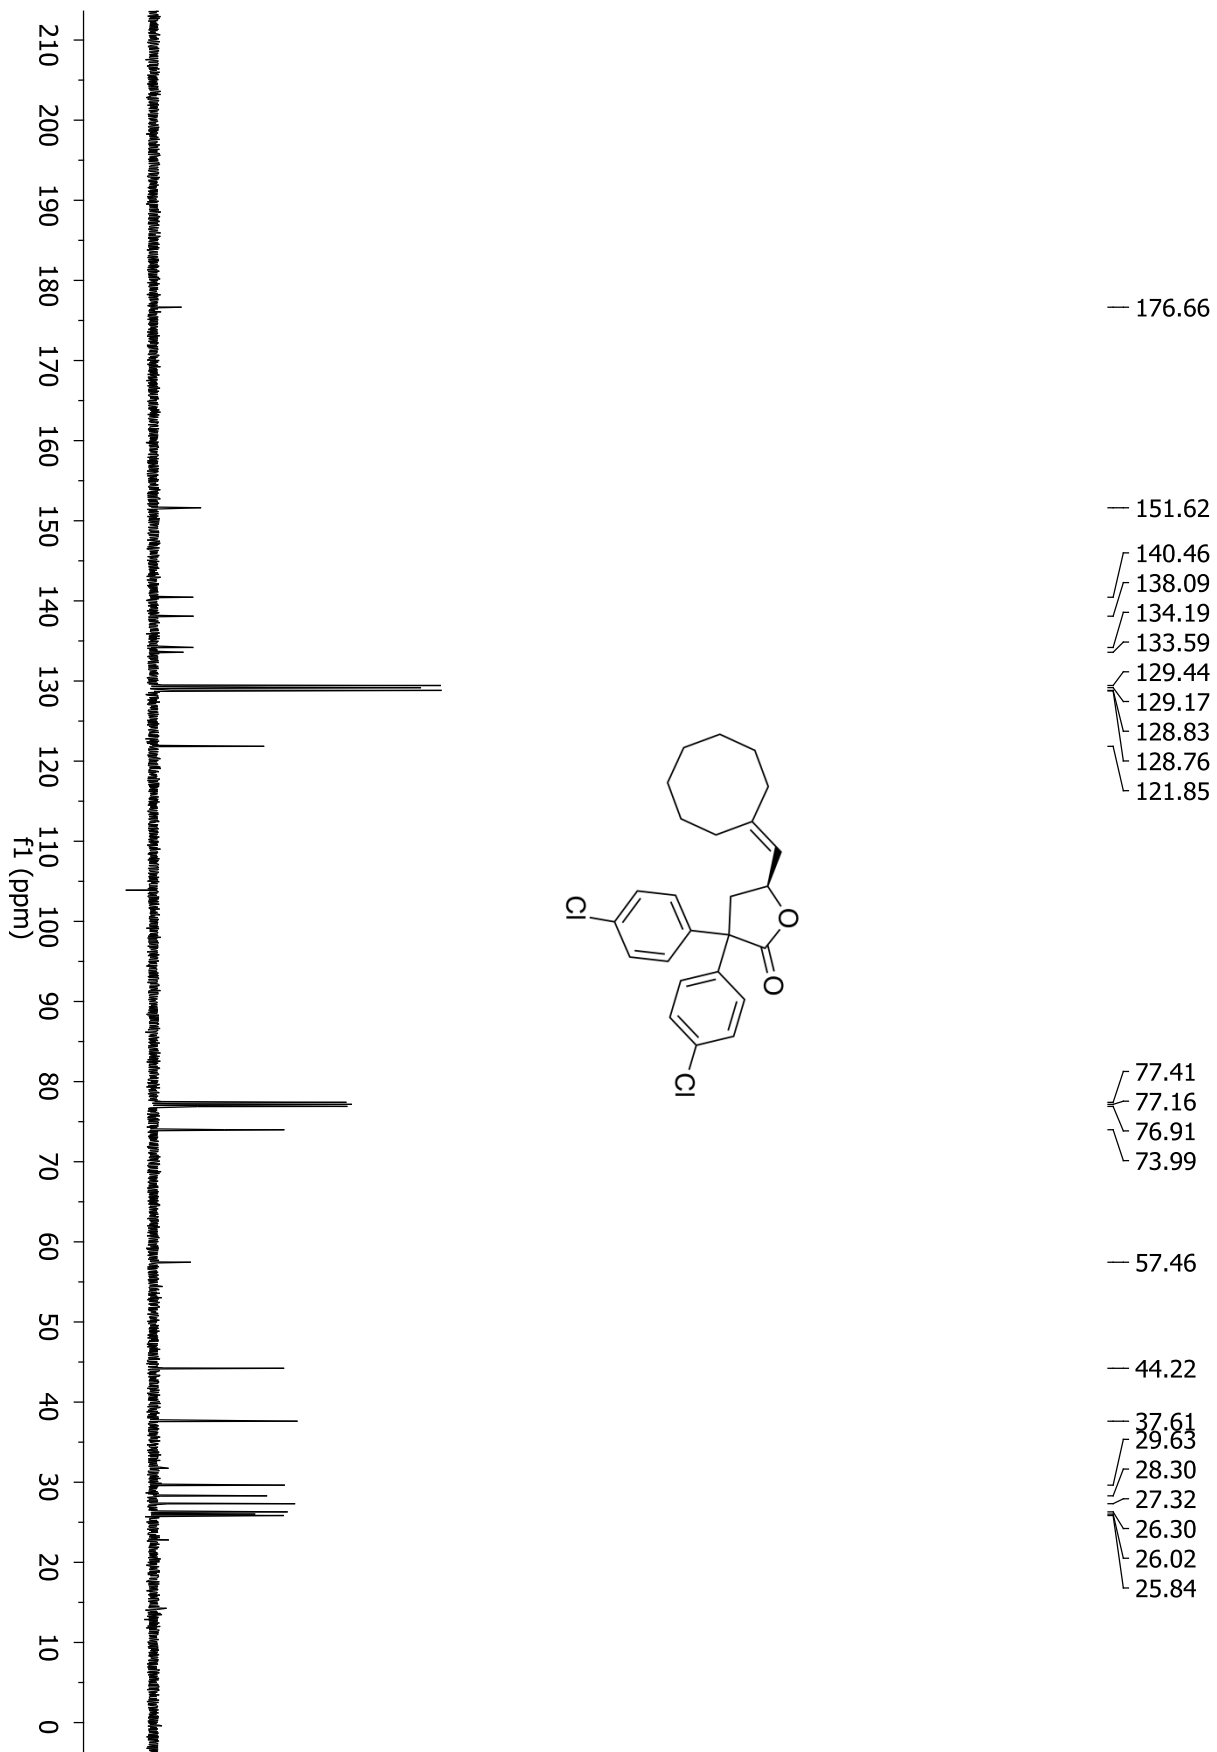

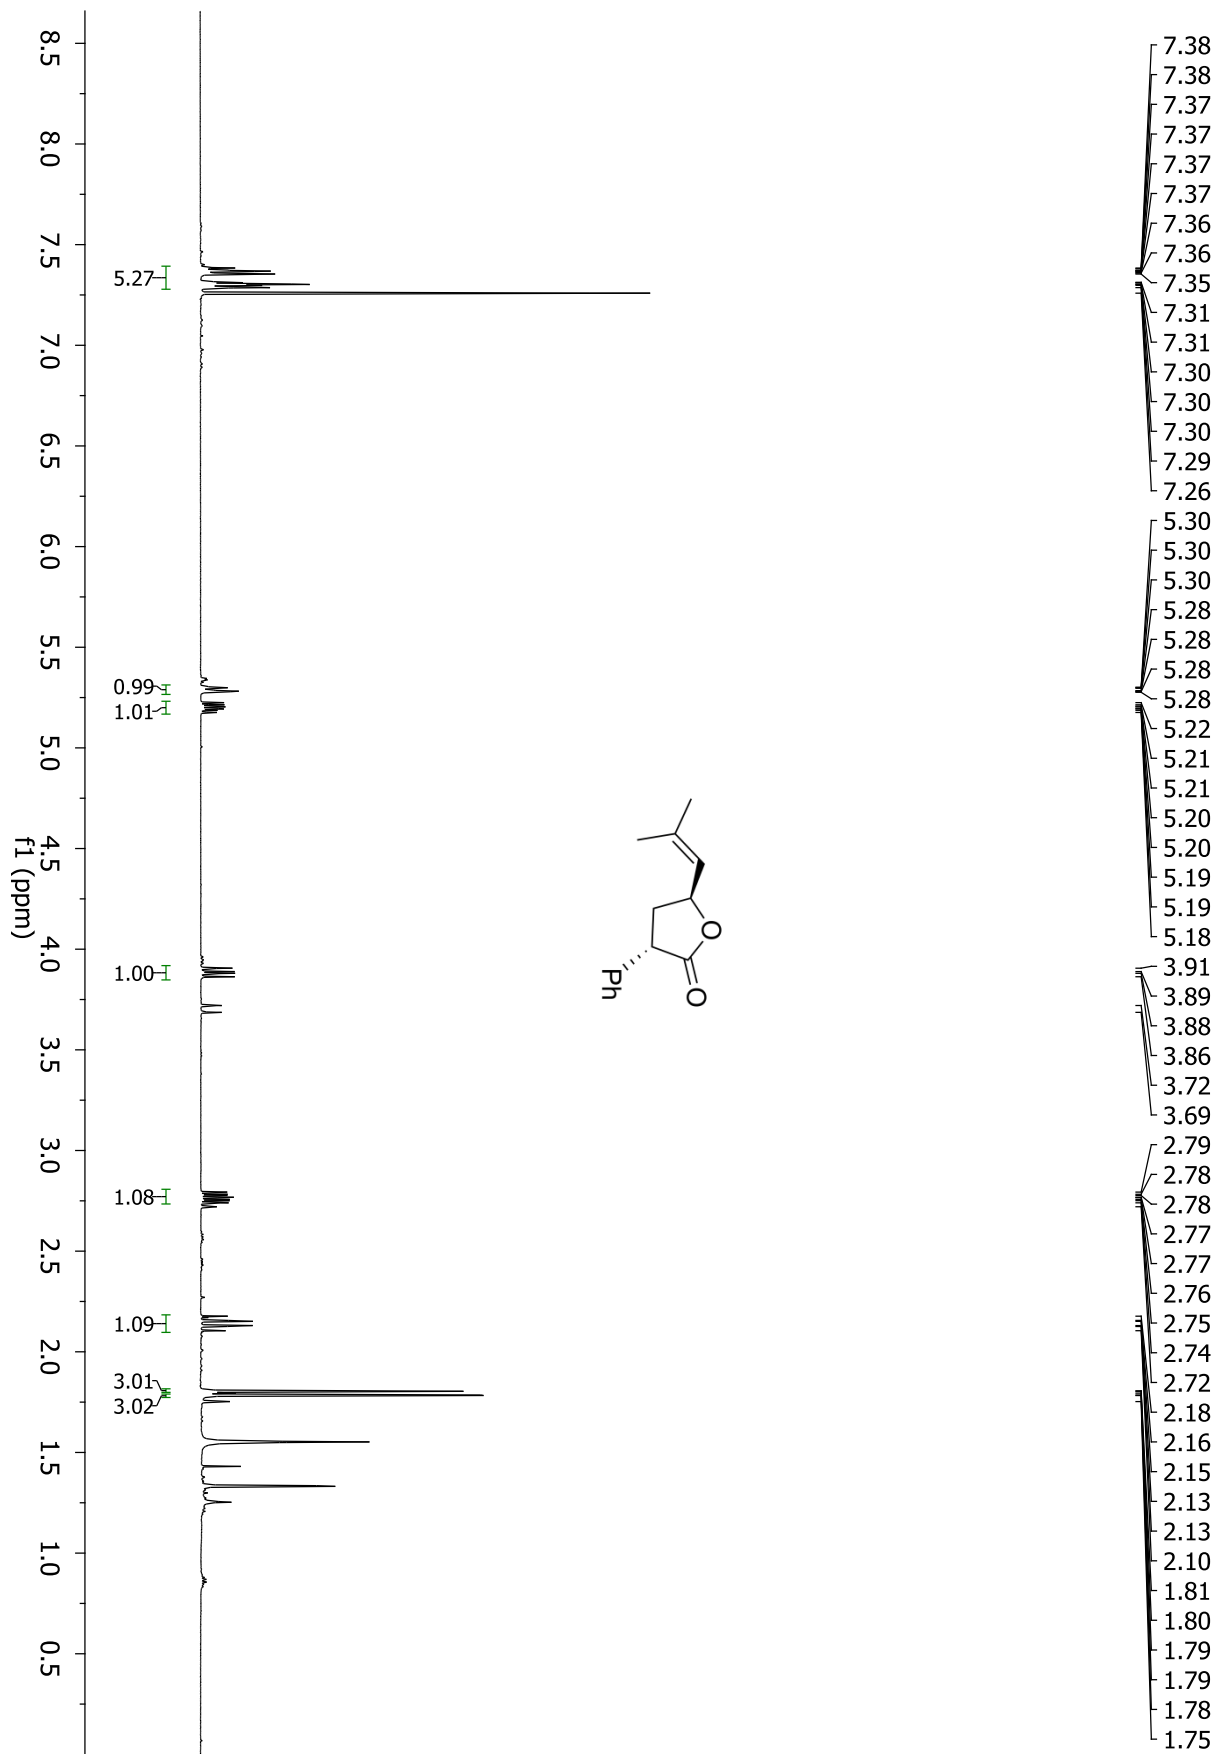



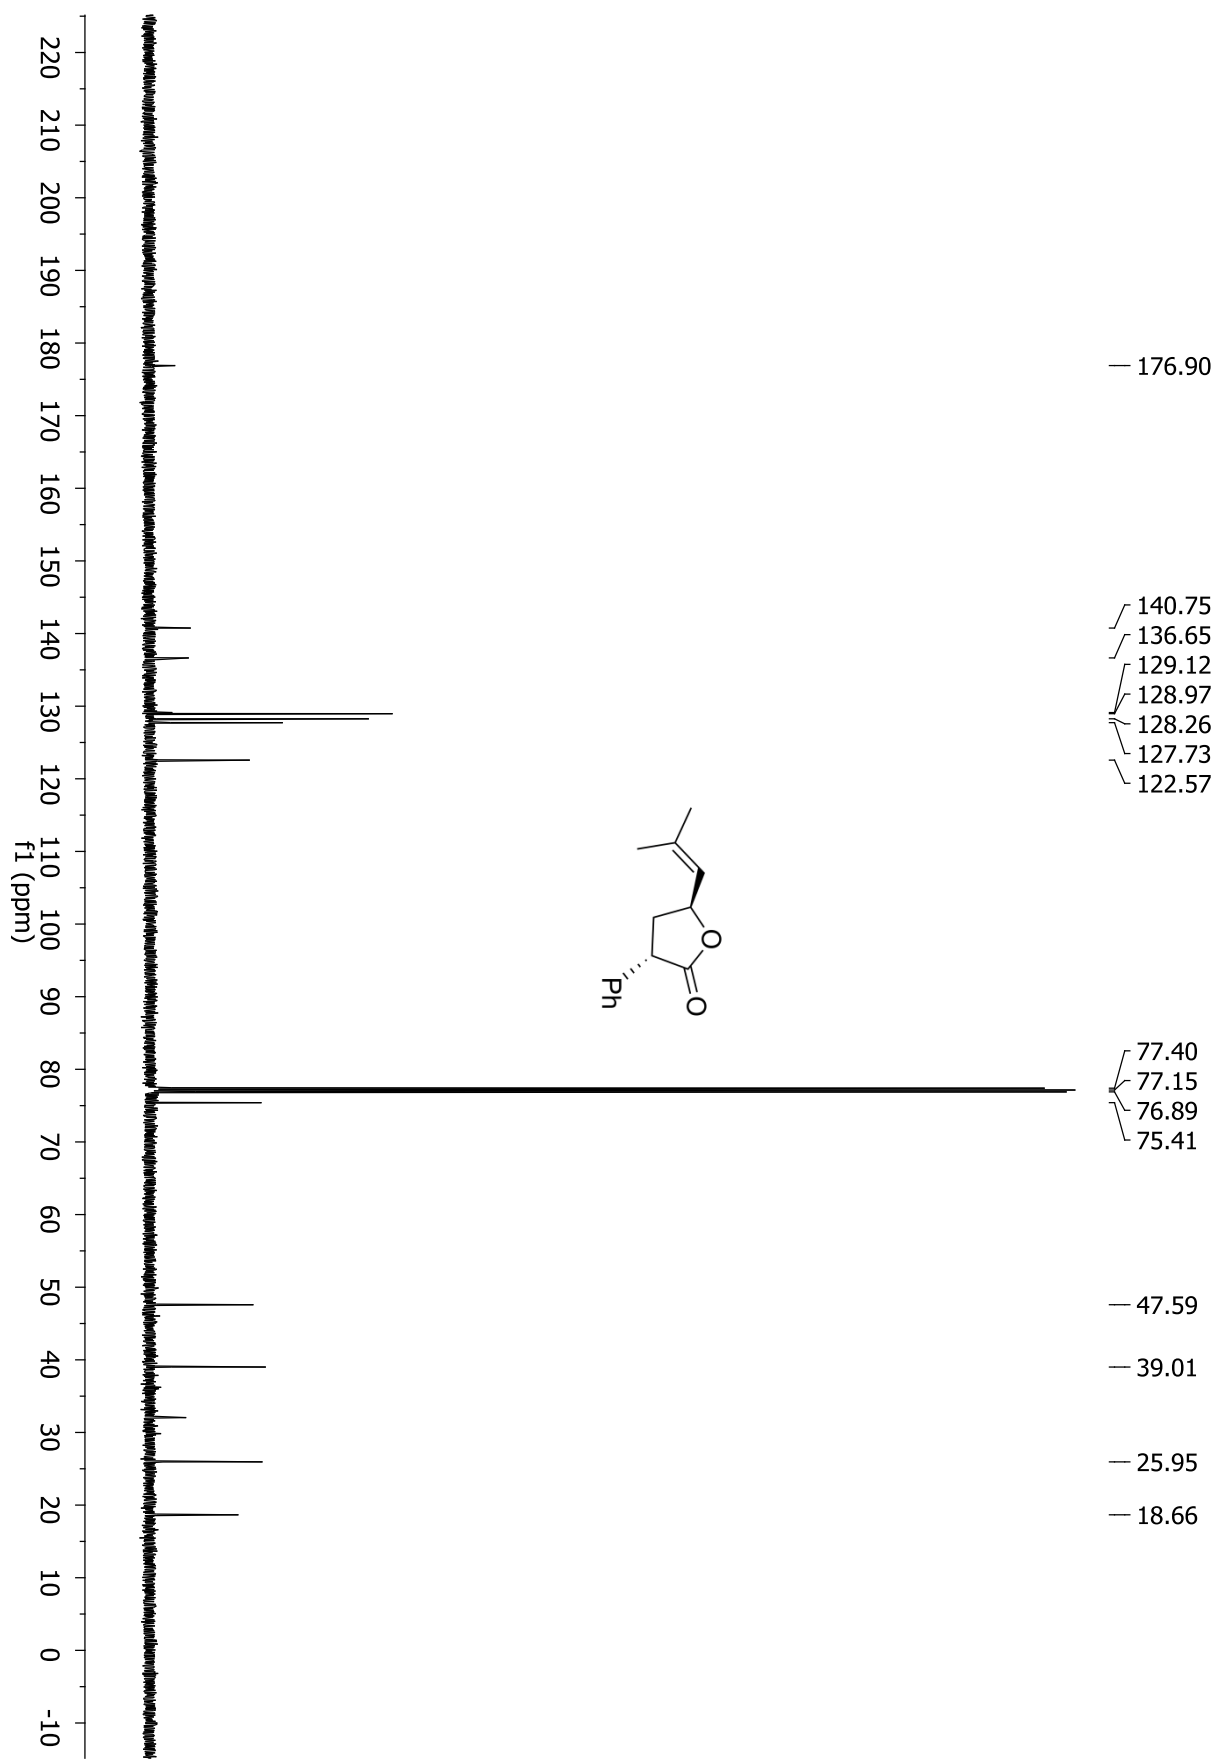

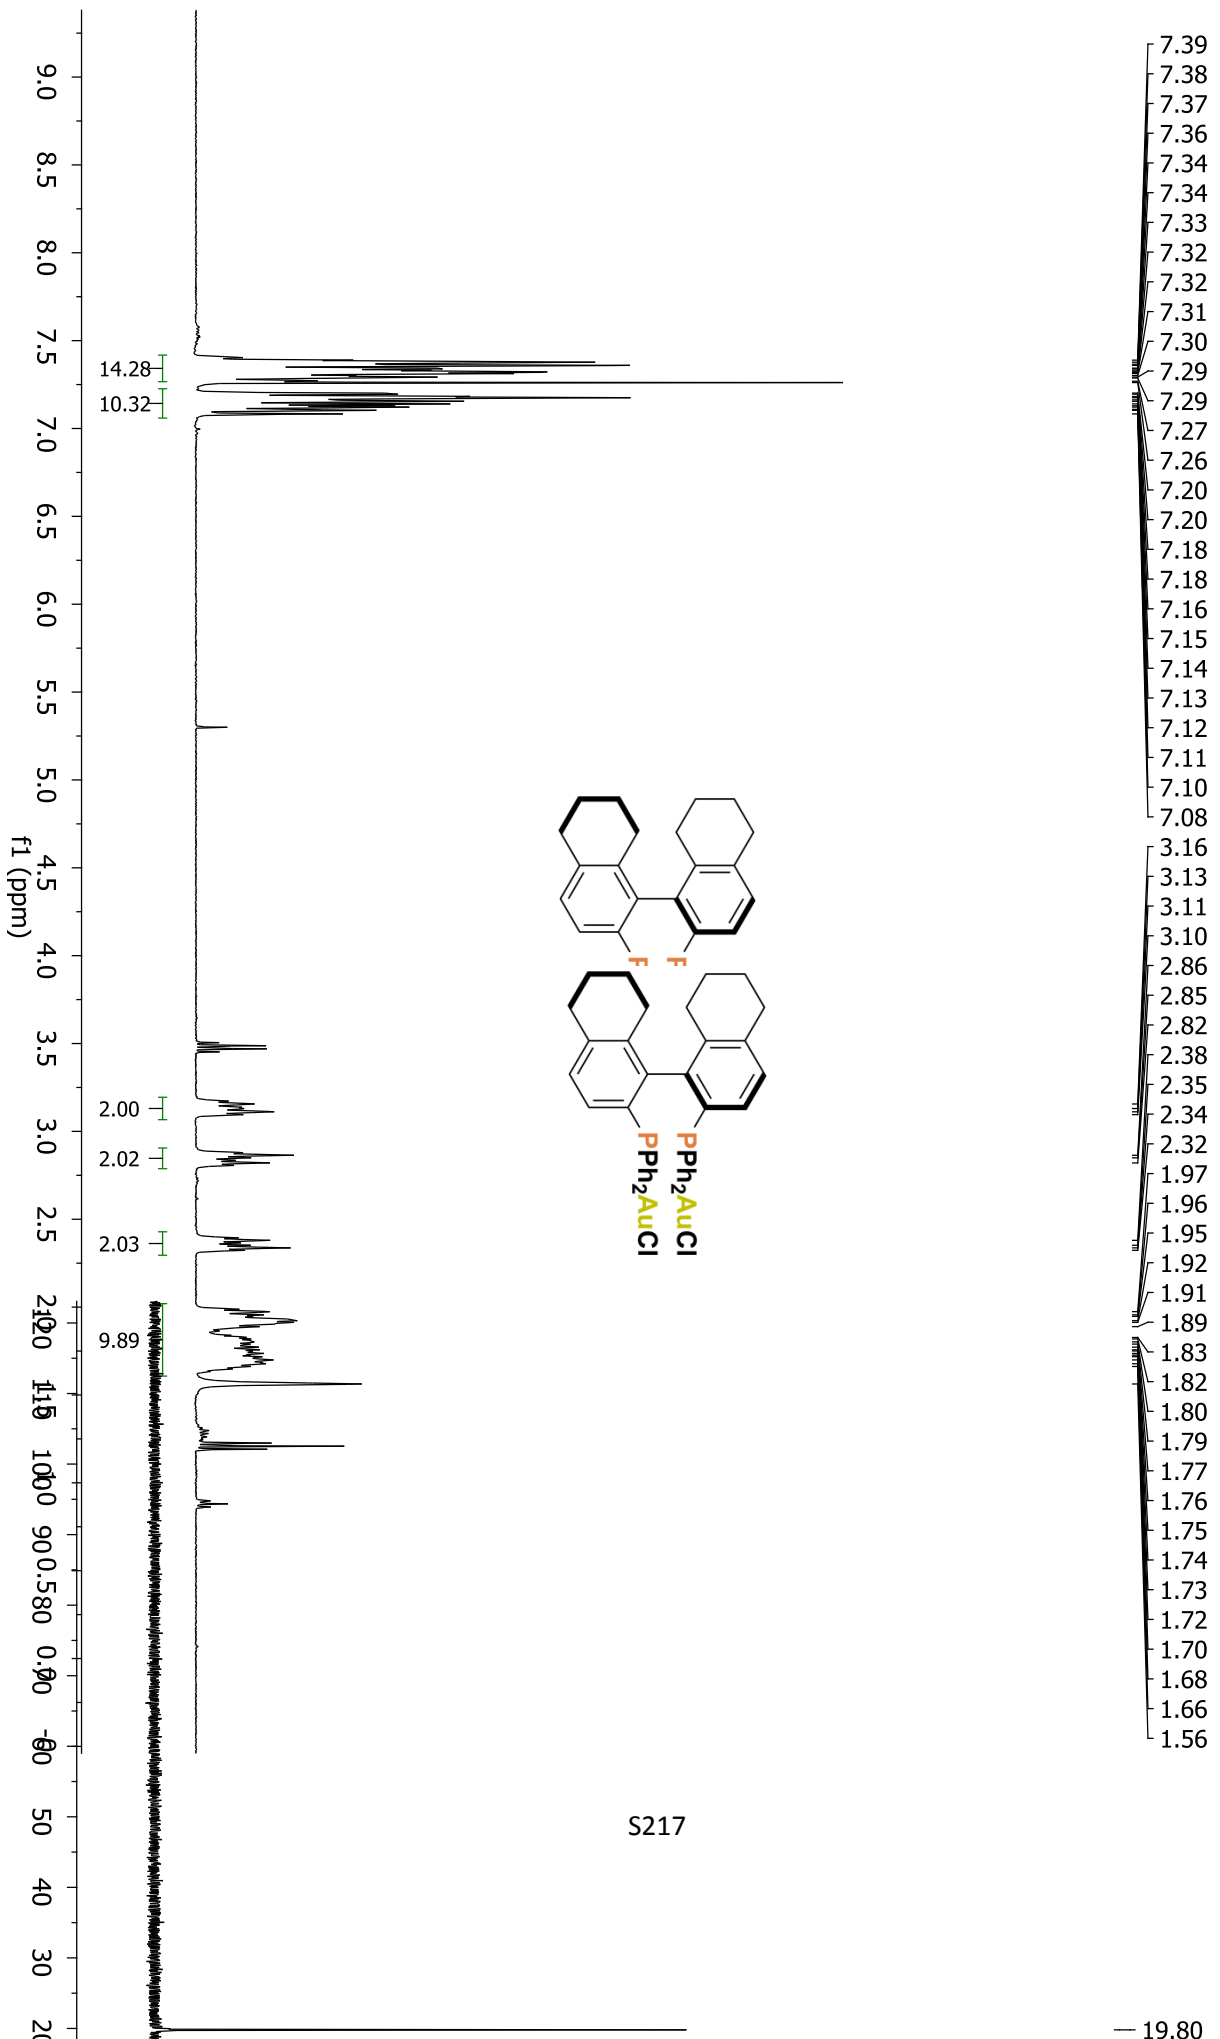

S217

19.80



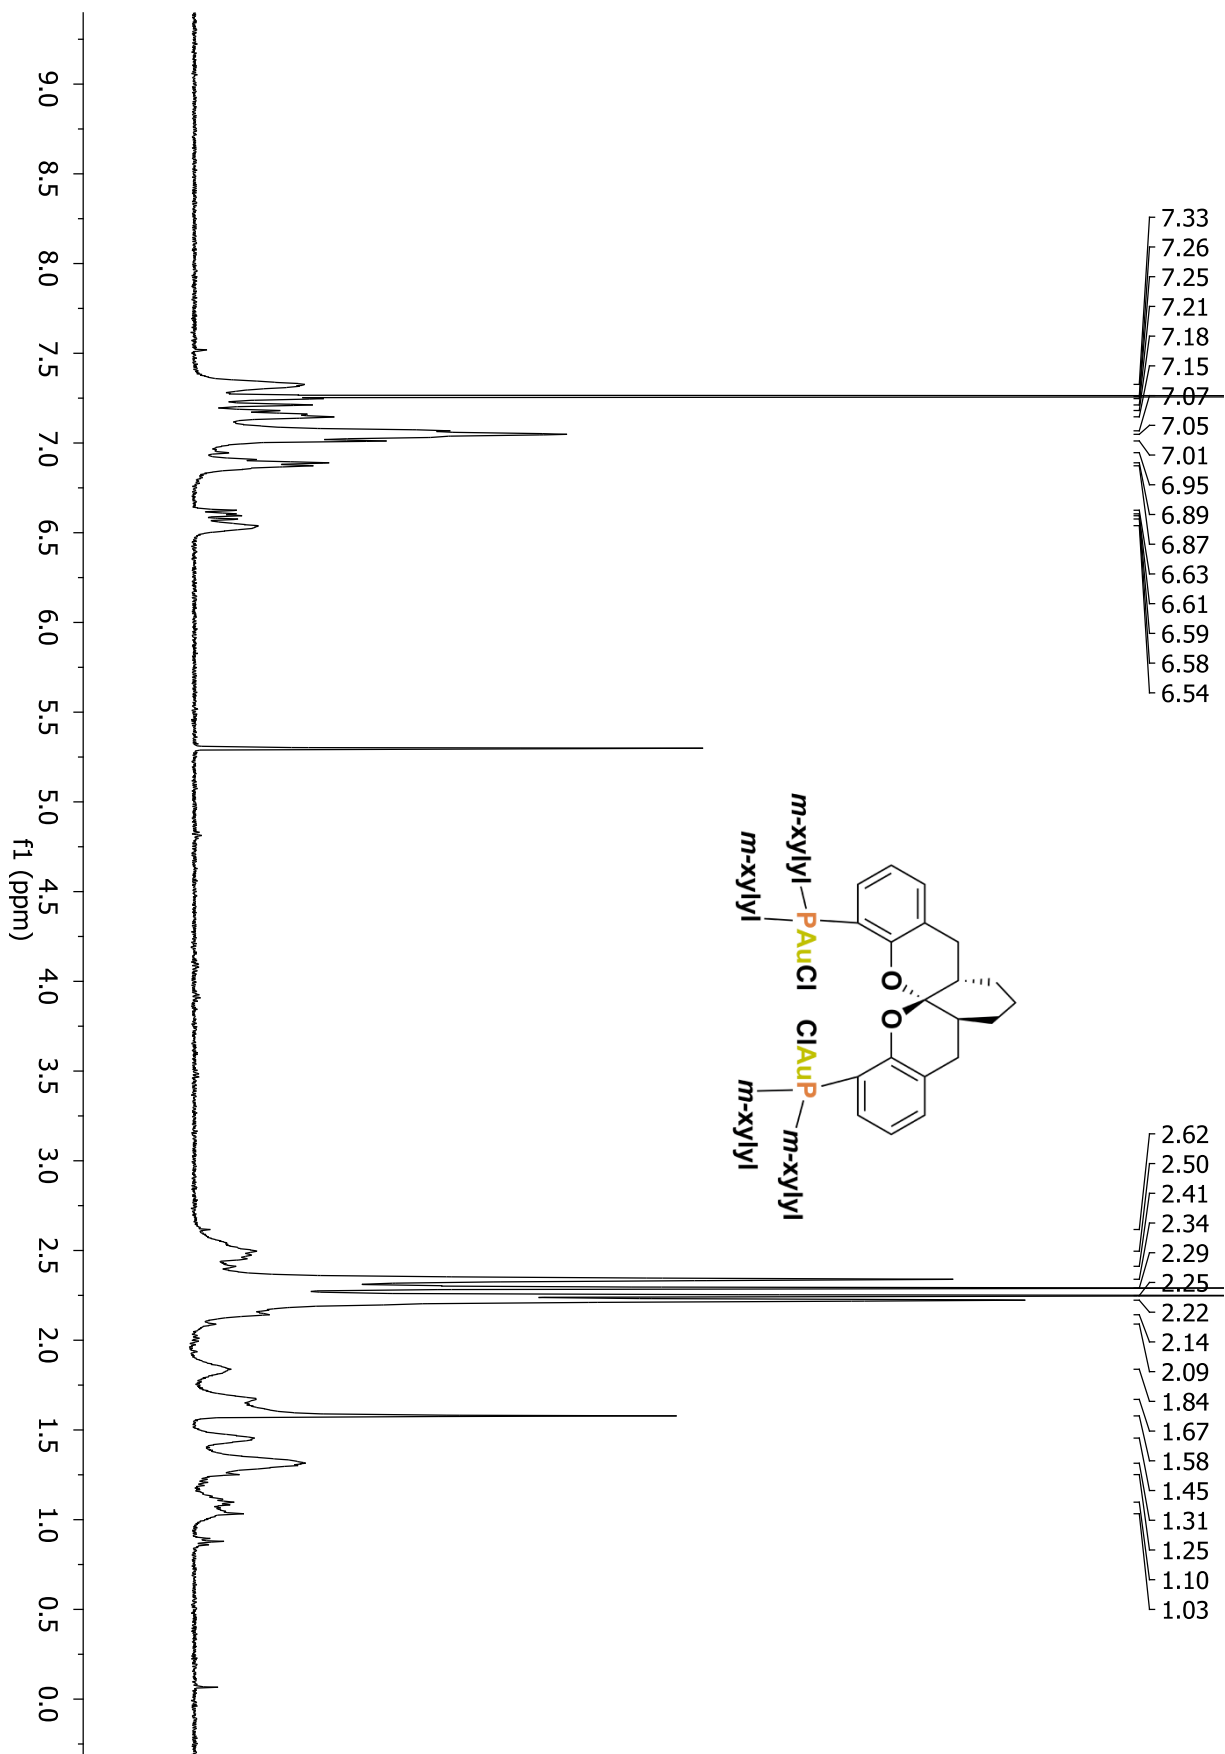

— 22.90

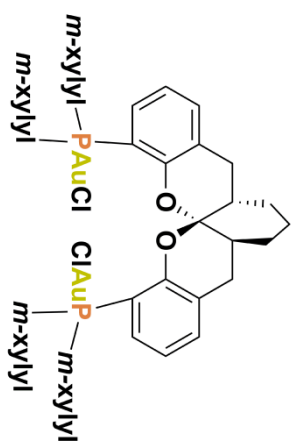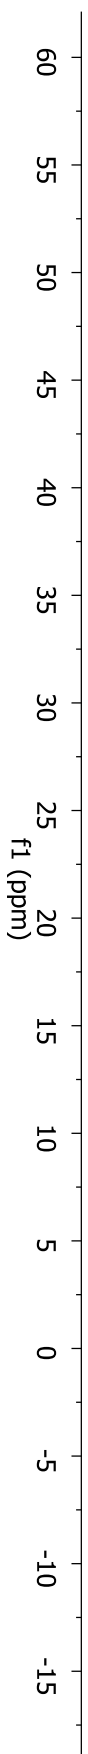

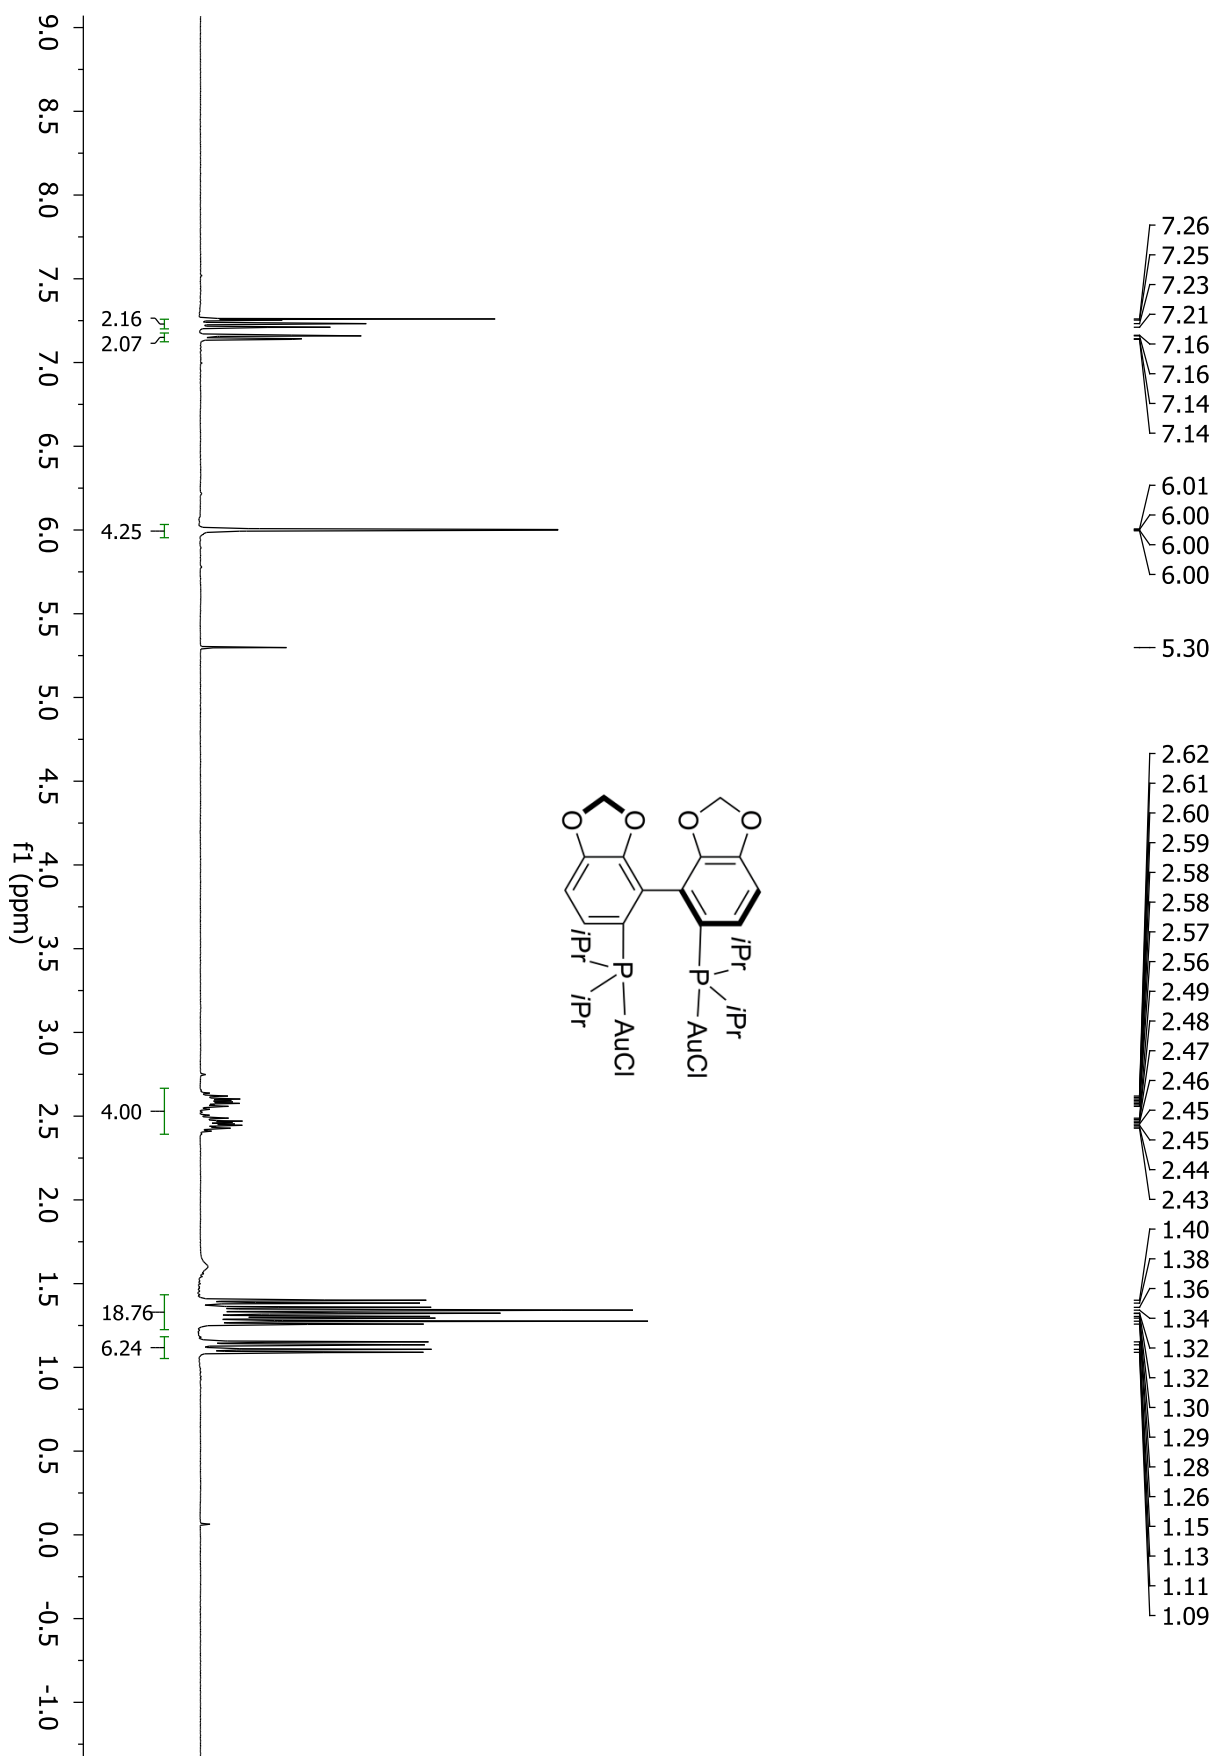

— 43.78

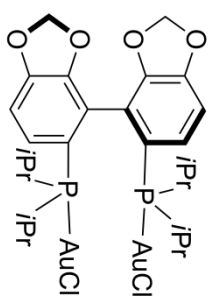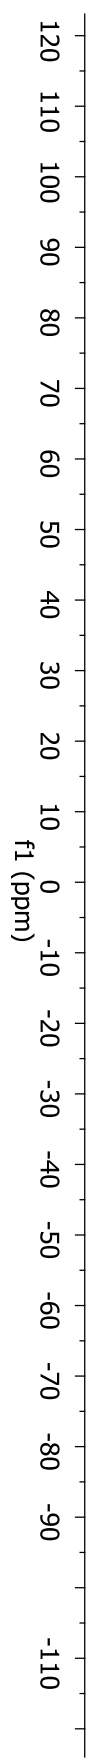

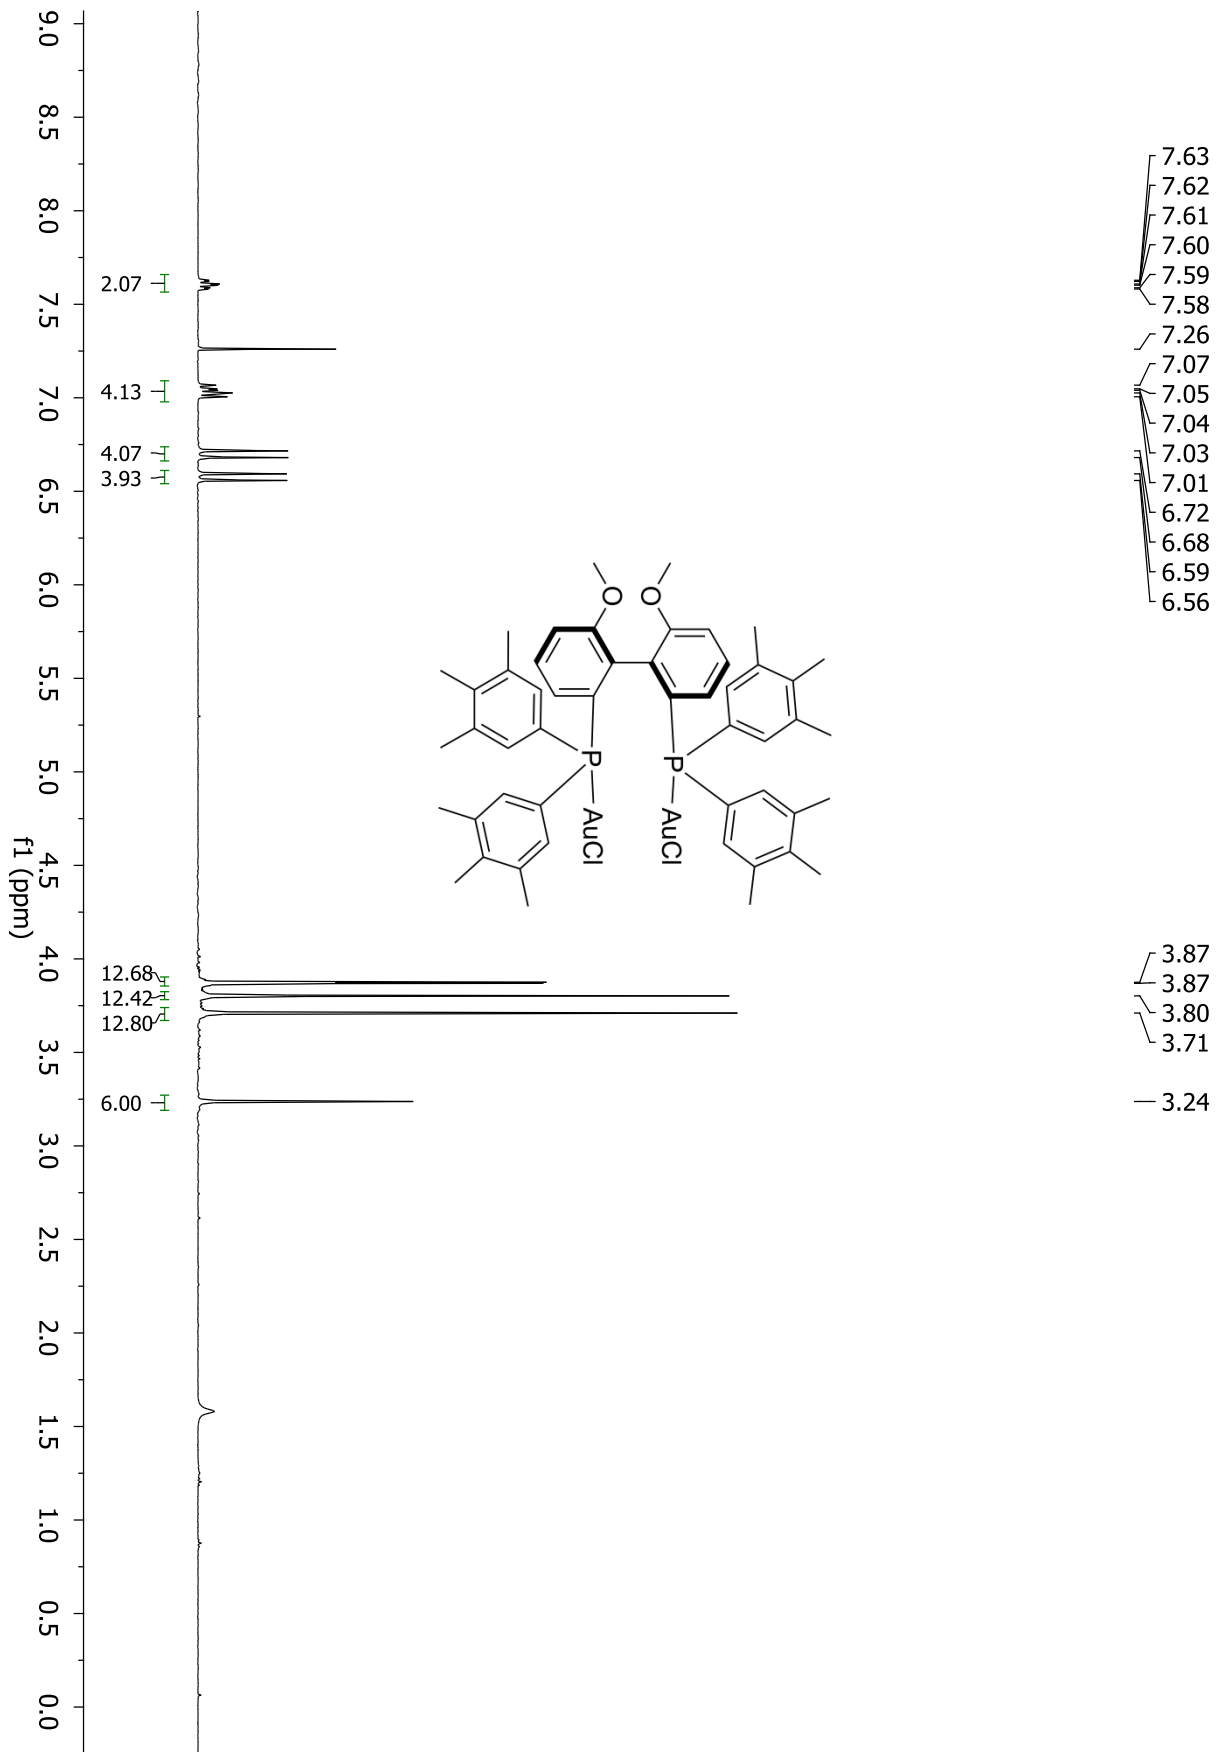



120 110 100 90 80 70 60 50 40 30 20 10 0 -10 -20 -30 -40 -50 -60 -70 -80 -90 -110  
f1 (ppm)

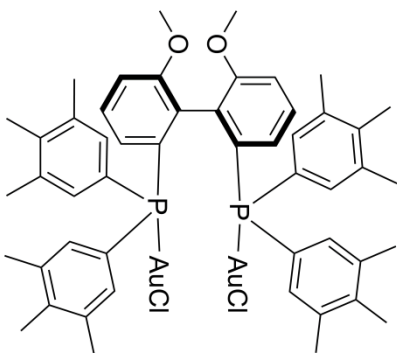

— 26.32

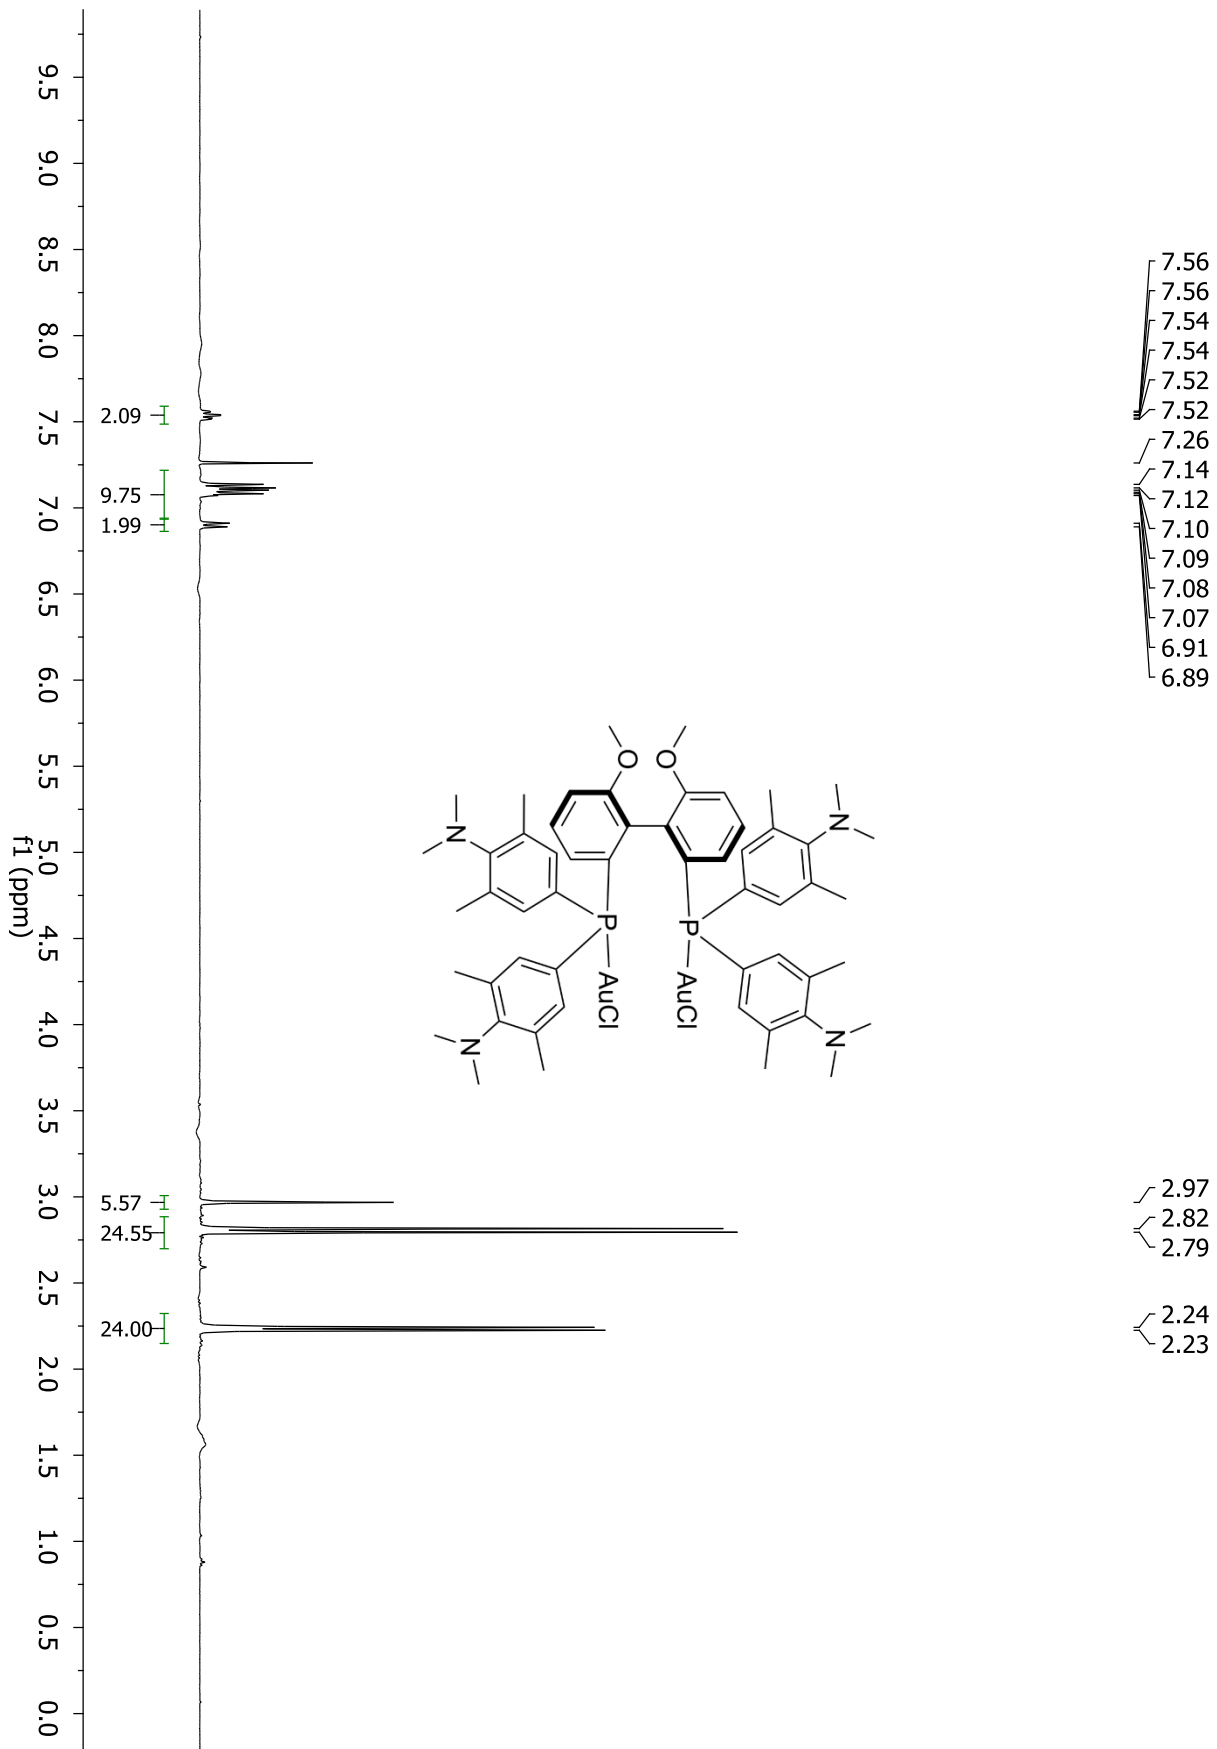

— 20.07

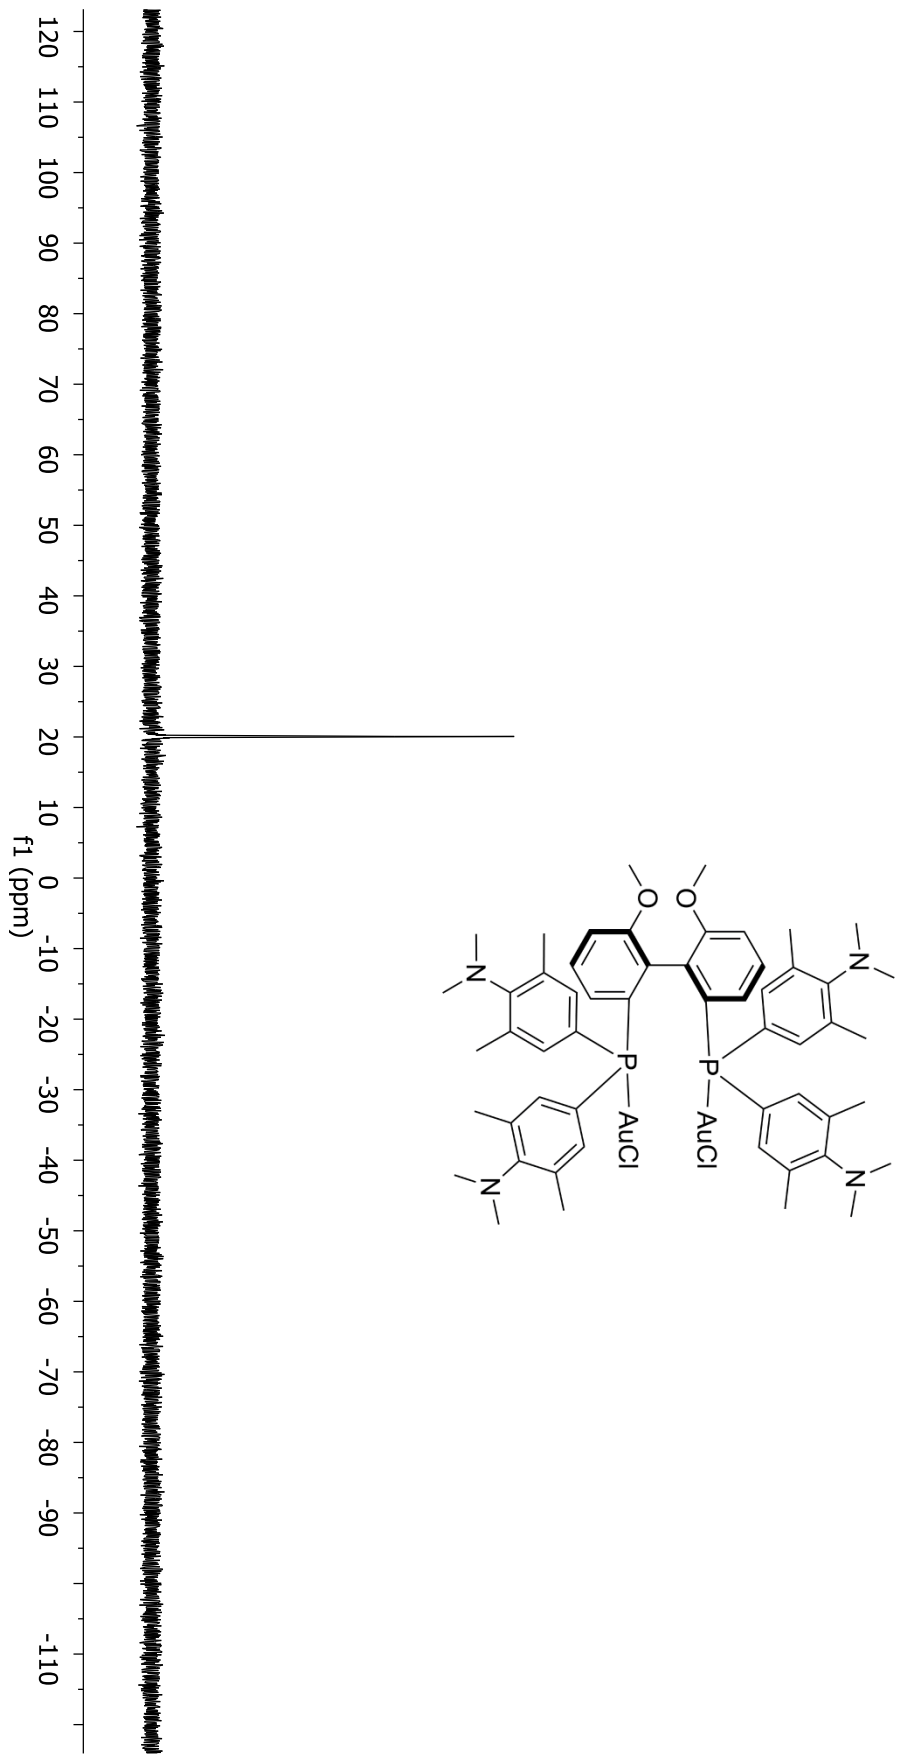

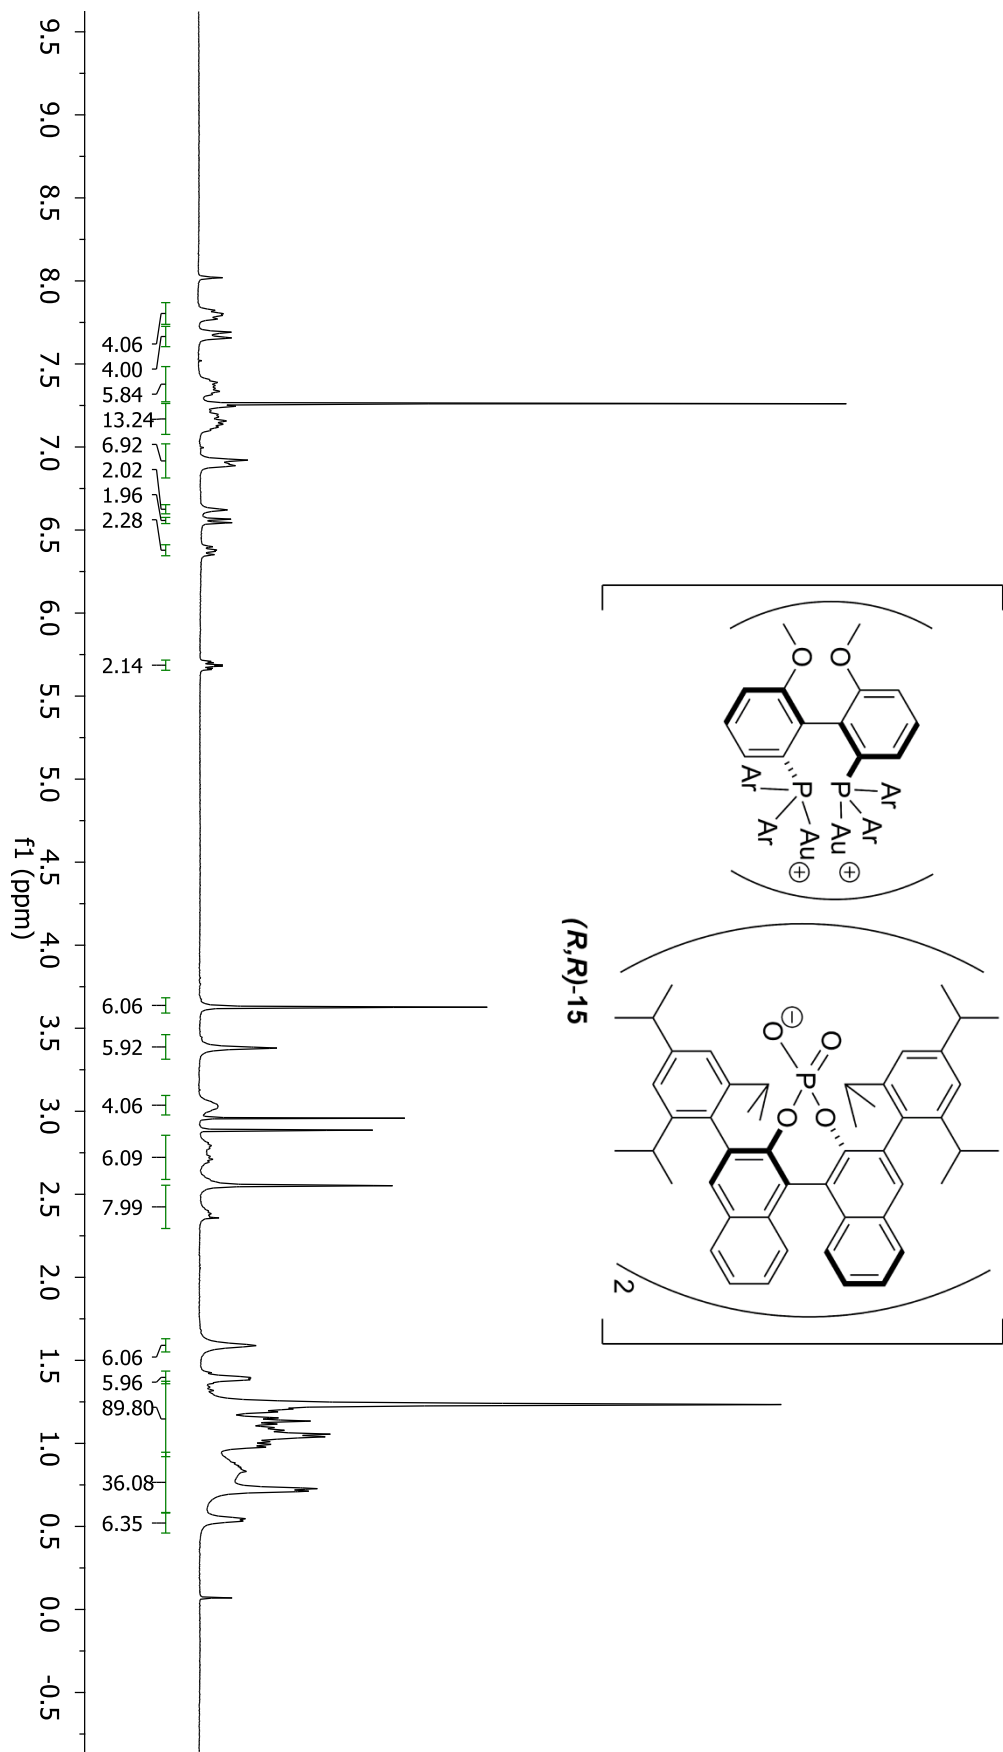

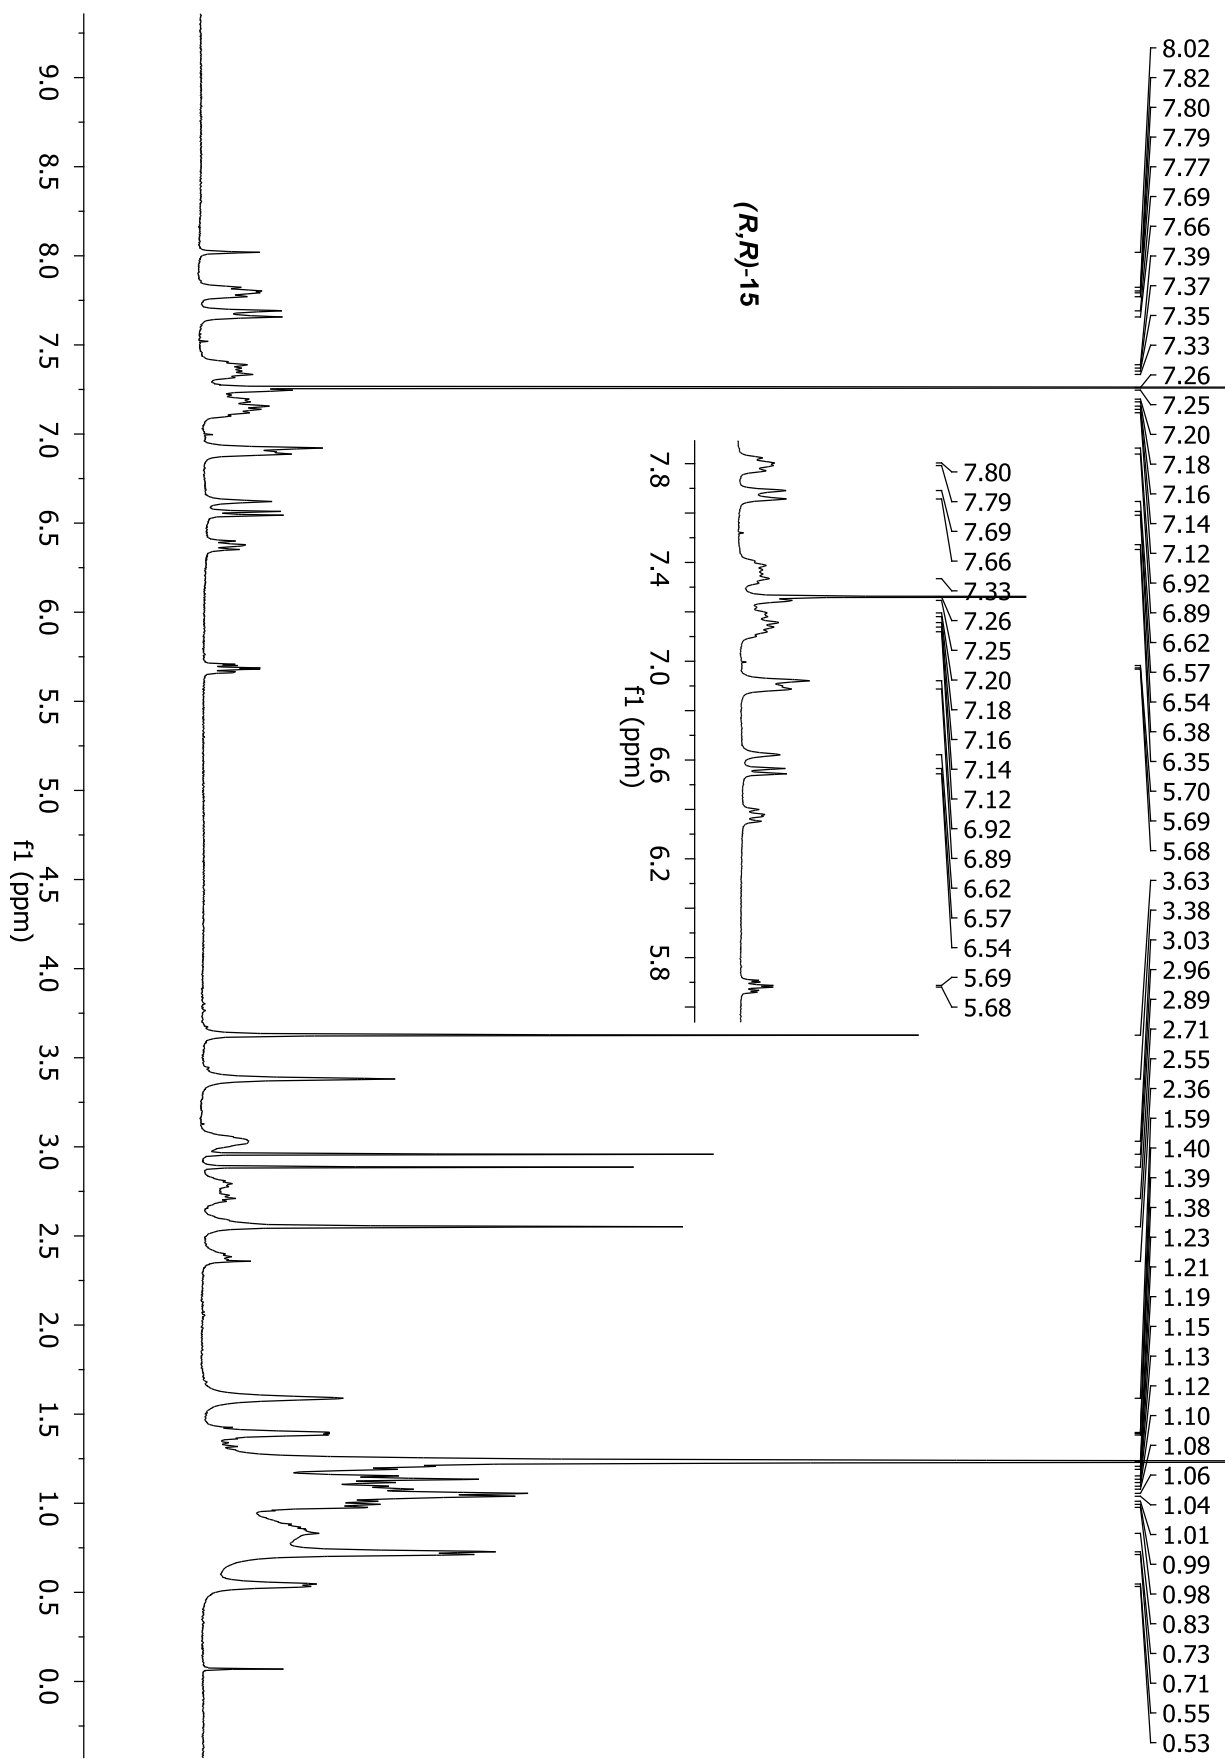

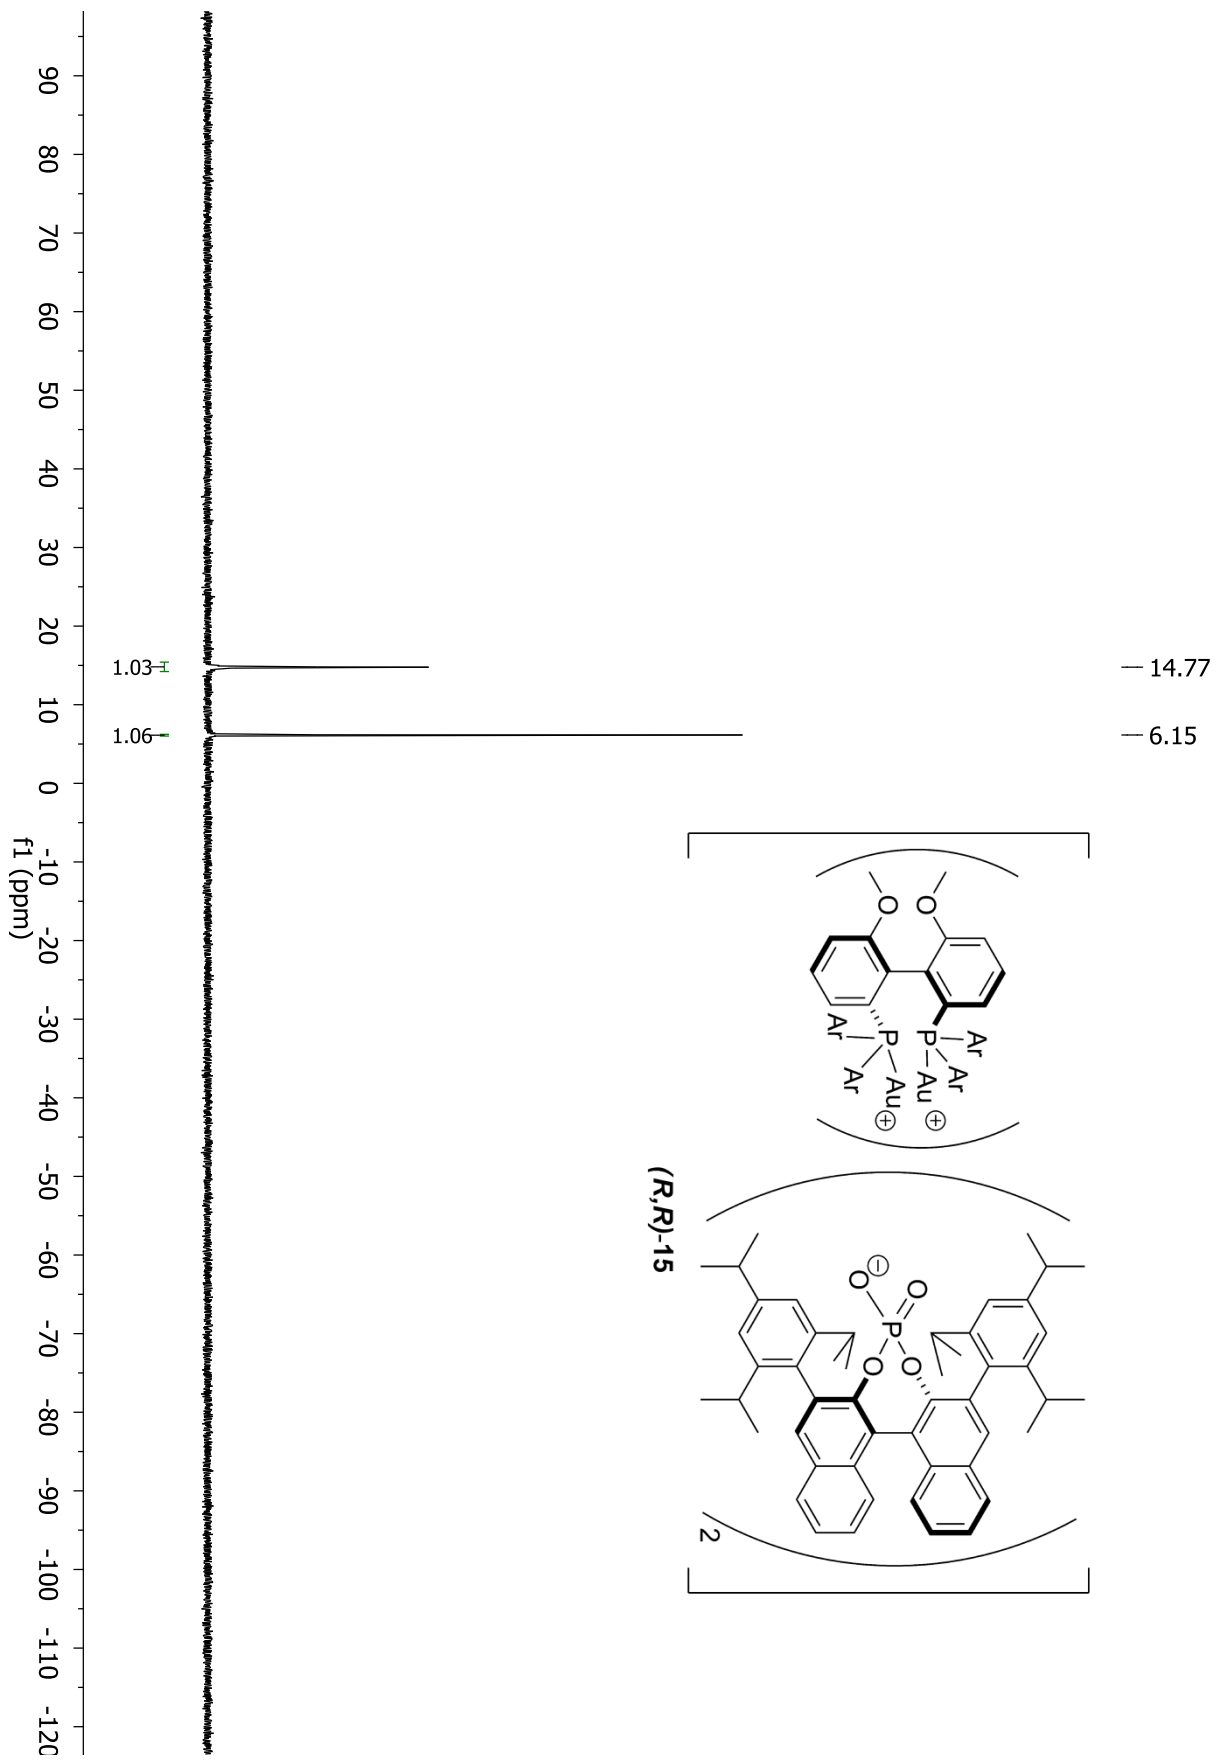

## SECTION II. COMPUTATIONAL DETAILS

### Part 1. Computational Results

**Theoretical Methods.** For molecules with no gold, complete geometry optimizations were carried out using density functional theory (DFT) methods using the B3LYP/6-311G(d,p),<sup>1</sup> M06/6-31+G(d,p), and M06/6-311+G(d,p) levels.<sup>2</sup> For organogold compounds, calculations were carried out using the B3LYP and PBE1PBE methods and the M06 method, shown to be optimal for metals.<sup>2</sup> The basis sets used for gold species were the LANL2DZ, LANL2TZ(f), SDD,<sup>3,4</sup> and aug-cc-pVXZ-PP<sup>4,5</sup> effective-core potentials. M06/6-31+G(d,p)(C,H,O,P)/SDD(Au) level geometry optimizations and frequency calculations were carried out in order to verify that the stationary points thus obtained were true minima and to determine thermodynamic parameters for the determination of reaction energetics. M06 single-point calculations were done with the 6-311+G(d,p)(C,H,O,P)/ LANL2TZ(f)(Au), aug-cc-pVDZ-PP, and aug-cc-pVTZ-PP basis sets using M06/6-31+G(d,p)(C,H,P)/SDD(Au) geometries. All M06 calculations were done with the Gaussian ‘int=ultrafine’ option. For non-gold species, 6-31 basis sets were used with the 5d option when energies are compared with calculations using 6-31 basis sets and effective-core potentials with gold species.

Thermochemical data were calculated with zero-point energy corrections from scaled M06 frequencies using a scaling factor of 0.99 for zero-point energies.<sup>6</sup> A scaling factor of 1.00 for M06 frequencies for the thermal and entropy terms was used.<sup>6ab</sup> The quasiharmonic approximation was used for low frequencies to calculate entropies to avoid the large distortions found when many low-frequency vibrations are present in organometallic compounds.<sup>6c</sup> Thus, frequencies below 100 cm<sup>-1</sup> were rounded up to 100 cm<sup>-1</sup> in calculating entropies. Intrinsic reaction coordinate (IRC) calculations<sup>7</sup> were carried out on transition-state structures to assure that the calculated transition states lead to the expected products and starting materials.

To establish confidence in the computational methods employed here in the analysis of the energies of organogold compounds, we have calculated energies at a variety of theoretical levels on smaller molecules to try to estimate the limits of accuracy of the methods used using CCSD(T)-F12 methods with aug-PVXZ-PP basis sets, which have been shown to agree well with experiment for gold, silver and copper.<sup>8</sup> These results show generally good agreement for the DFT methods and basis sets employed. We have chosen a polarized continuum model in ether solvent for our calculations using the SMD method of Truhlar and Cramer.<sup>9</sup> Solvent effects by similar methods have been treated

successfully for cases where quantitative comparison with experiment is possible.<sup>10</sup> Preliminary Born-Oppenheimer molecular dynamics (BOMD) calculations<sup>11</sup> were carried out at the B3LYP/6-31G(d)/SDD(Au) level to compute reaction trajectories. BOMD calculations were used for these organometallic compounds, since they could be done with larger step sizes (2500) than the, normally more efficient, atom-centered density matrix propagation molecular dynamics (ADMP) calculations.<sup>12</sup> All calculations were performed using the Gaussian 09 program suites.<sup>13</sup>

**Theoretical Results.** The mechanism by which these gold-catalyzed reactions might proceed has been investigated using DFT calculations with a PH<sub>3</sub> ligand with the carboxylic acid precursor to product **19**, but without the phenyl substituents. Figure S1 shows two reaction mechanisms that have been considered with the terminal cyclopentano substituent. (1) One mechanism involves a strongly exothermic complexation of PH<sub>3</sub>Au<sup>+</sup> with the allene carboxylic acid to form **SM<sup>+</sup>** in Figure S1 followed by attack of the carboxylic acid oxygen at an allenic carbon. This reaction can occur with four regioisomeric outcomes, the most favorable experimentally being the 5-exo-trig attack to form **5-exo-trig prodH<sup>+</sup>**. This intermediate may then undergo protodeauration via **5-exo-trig prod** to eventually form the final five-membered ring lactone product. The other regioisomeric products studied are also shown in Figure S1. (2) The alternative mechanism studied was one in which the carboxylic acid group is deprotonated before attack on the gold-allene moiety via **SM**, which results in direct formation of **5-exo-trig prod**, which could then undergo protodeauration, similar mechanisms can lead to the other three regioisomers, but are not shown in Figure S1.

Relative free energies of reaction and transition-state free energies in the gas phase and in solvent from quantum calculations are reported for the numerous reactions in Tables S1 and S2 for the cyclopentano substituent and Tables S3 and S4 without that substituent. Figure S2 shows structures of the transition states and intermediates. Thermochemical data and structures are reported for selected compounds in Table S5.

Table S1 contains differences in free energies for reactions of cyclopentano-4,5-hexadienoic acid with PH<sub>3</sub>Au<sup>+</sup> at the M06/6-31+G(d,p)/SDD(Au) level in the gas phase and in chloroform and at the PBE1PBE/6-31+G(d,p)/SDD(Au)/SMD(toluene) level with geometries optimized with toluene solvent. These results show that the formation of **5-exo-trig prodH<sup>+</sup>** and its regioisomers was endoergonic in all cases, with free-energy barriers slightly larger than the endoergonicity. The **5-exo-trig prodH<sup>+</sup>** intermediate appeared not to be at a minimum in the gas-phase calculations, but was found in toluene solution calculations. The 5-exo-trig and 6-endo-dig products are favored thermodynamically in



toluene. Solvation is expected to play a very large role for these ionic species, generally favoring smaller ions with high charge density such as  $\text{PH}_3\text{Au}^+$ .<sup>14</sup> This effect is seen clearly in the effect of solvent on the free energy of the complexation reaction of  $\text{PH}_3\text{Au}^+$  with the allene carboxylic acid in Table S1. Similarly the **SM**<sup>+</sup> appears to have a somewhat higher charge density than the ring-closing products like **6-endo-dig prodH**<sup>+</sup>, with correspondingly smaller solvation effects in Table S1 (and Table S3). It is not certain what polarity to expect for the medium in the interior of the micelles containing these gold complexes. Some experiments to probe this issue were carried out with the commercially available 2,6-di-*t*-butyl-4(2,4,6-triphenyl-1-pyridino) phenolate  $E_T$  dye<sup>15</sup> dissolved in the TPGS-750-M micelle used in this work. These experiments gave an  $E_T$  value similar to *n*-propanol. This is more polar than we would expect for the hydrophobic region of the micelle. Despite the *t*-butyl groups encumbering the phenoxy anion end of the dye, it appears that the phenoxy group is attracted to the polar interface of the micelle by hydrogen bonding to water in that region as seen to a greater extent for the less encumbered 2,6-di-*t*-butyl-4(2,4,6-triphenyl-1-pyridino) phenolate  $E_T(30)$  dye.<sup>16</sup> It is likely that toluene solvent best mimics the micellar environment of our gold complexes, but comparing data in different solvents shows that the trends in relative reaction energies in Tables S1 and S2 are similar in all solvents tried.

Results of calculations on reactions without the cyclopentano substituent in Table S3 are rather similar to those with the ring in Table S1. The most complete set of transition-state energies that we obtained were in toluene solvent at the PBE1PBE/6-31+G(d,p)/SDD(Au)/SMD(toluene) level, showing the lowest energy transition state is for 5-*exo*-trig product, rather than the 6-*exo*-dig pathway, as observed experimentally. The other regioisomers have higher, but similar, transition-state energies that run mainly parallel to the order of the product energies. The electronic energies of these reactions at the M06/6-31+G(d,p) )/SDD(Au) and PBE1PBE/6-31+G(d,p)/SDD(Au) levels compare closely with M06/aug-cc-pVTZ-PP calculations using a much larger basis set in Table S3.

Concern that the calculated reaction paths did not clearly fit experiment and the fact that transition-state energies were similar and in a potentially flat energy surface, led us to consider the possibility that these reactions might be complicated by bifurcation mechanisms. We and others have seen such mechanisms in similar situations in gold chemistry.<sup>17</sup> This idea was tested by doing preliminary BOMD trajectory calculations in toluene at the PBE1PBE/6-31+G(d,p)(C,H,O,P)/SDD(Au)/SMD level starting from the optimized **5-*exo*-trig TSH**<sup>+</sup> (100 trajectories) and **6-*endo*-dig TSH**<sup>+</sup> (50 trajectories) structures with the cyclopentano substituent. The **5-*exo*-trig TSH**<sup>+</sup> trajectories all led back to **SM**<sup>+</sup> or its slightly more stable Au-slipped allylic cation

isomer.<sup>18</sup> The **6-endo-dig TSH<sup>+</sup>** trajectories led primarily again to **SM<sup>+</sup>** and 10% of **6-endo-dig prodH<sup>+</sup>**. No crossover to 5-membered products that would suggest a bifurcation have been seen thus far. Another concern in probing the preference for 5-membered ring lactones, as well as the stereochemical selectivity, found experimentally for these reactions is whether protodeauration might be the rate-limiting, and product-determining, step in these reactions. Experimental evidence for such a mechanism has been found by Widenhoefer<sup>19</sup> for allenic alcohols. Experimental<sup>20</sup> and computational<sup>21</sup> studies of the protodeauration reaction does not offer a clear general answer to whether it would be rate determining for other reactions.

Experiments with small amounts (0.10 equiv.) of added base, triethylamine or tetrabutylammonium hydroxide, in our reactions led, in fact, to accelerated reaction rates which does not appear to be consistent with a rate-determining protodeauration. In light of these experiments, we considered the possibility that the reaction mechanisms might proceed through a deprotonated carboxylic acid **SM** in Figure S1. While the rate acceleration certainly implicates a carboxylate intermediate **SM**, it is difficult, theoretically, to ascertain the thermodynamics of such a deprotonation step within the micelle. Determining the magnitudes of solvent effects and ion-pairing effects in the micelle is problematic. We did, however, estimate the energy required for this deprotonation step within the micelle with triethylamine as base using calculated deprotonation energies in both dichloromethane and toluene, which likely spans the polarity range within the micelle. The deprotonation step was estimated at 10-27 kcal/mol uphill in free energy (see Table S2), and we expect that ion-pairing effects would lower the reaction energy to make this a quite feasible reaction pathway.

In Table S2, we see calculations showing that the 5-exo-trig and 6-endo-dig products from this reaction in base are the most stable of the four possible regioisomers in three different solvents. For the allene without a cyclopentano substituent, the calculations showed some complications with the 6-exo-dig product favored thermodynamically in the gas-phase and solution. At some levels of theory, low-barrier transition states in dichloromethane could be found for some product-forming reactions from the extended conformation of the starting carboxylate, but in toluene these transition states were barely higher in energy than the starting conformation. The significance of such transition states is not clear at this point. Calculations in solution showed that there was no minimum that could be detected for the starting material **SM**, unless it was in an extended conformation with the carboxylate ion far from the allene-gold moiety, or in a cyclic form with weak complexation of the carboxylate group to gold ( $\Delta G^\circ = -4.7$  kcal/mol in  $\text{CH}_2\text{Cl}_2$  and  $-13.3$  kcal/mol in toluene, PBE1PBE/6-

31+G(d,p)/SDD(Au)/SMD(toluene)). Whenever the conformation was changed to bring the carboxylate closer in the gas phase, 5-exo-trig and/or 6-endo-dig products were formed without a barrier. This sort of reaction mechanism is akin to ridge-valley inflection bifurcation reactions,<sup>17a</sup> where a conformational change leads to a conformation of the starting material that can then proceed downhill to products with little or no further barrier. This process was modeled with preliminary BOMD trajectories at the B3LYP/6-31G(d)(C,H,O,P)/SDD(Au)/SMD level starting at various conformations of the carboxylate starting material as the carboxylate closely approaches the gold-allene group from the backside in the gas phase and in toluene solution. The trajectories mainly gave **SM** and the 5-exo-trig product, opt=calcall calculations from such conformations similarly favored the 5-exo-trig product. While the selection of starting geometries for the trajectories has been somewhat arbitrary at this point, the results do show that preferred formation of the 5-exo-trig product is conceivable in this sort of mechanism.

In the absence of added base, the deprotonation step would be more difficult and the reaction mechanism might proceed by direct attack of the carboxylic acid carbonyl group on the bridged gold complex, for which we found reasonably small free-energy barriers of less than 20 kcal/mol and predictions of the experimental regiochemistry. Curiously, the addition of triethylamine base seriously lowers the %ee observed in the reaction to the same levels as observed without a chiral counterion. Furthermore, the %ee does not depend upon which enantiomeric form of the counterion is used when base is added. These observations could be understood in terms of a change in mechanism, wherein we might expect the counterion to be less tightly bound to gold after deprotonation.

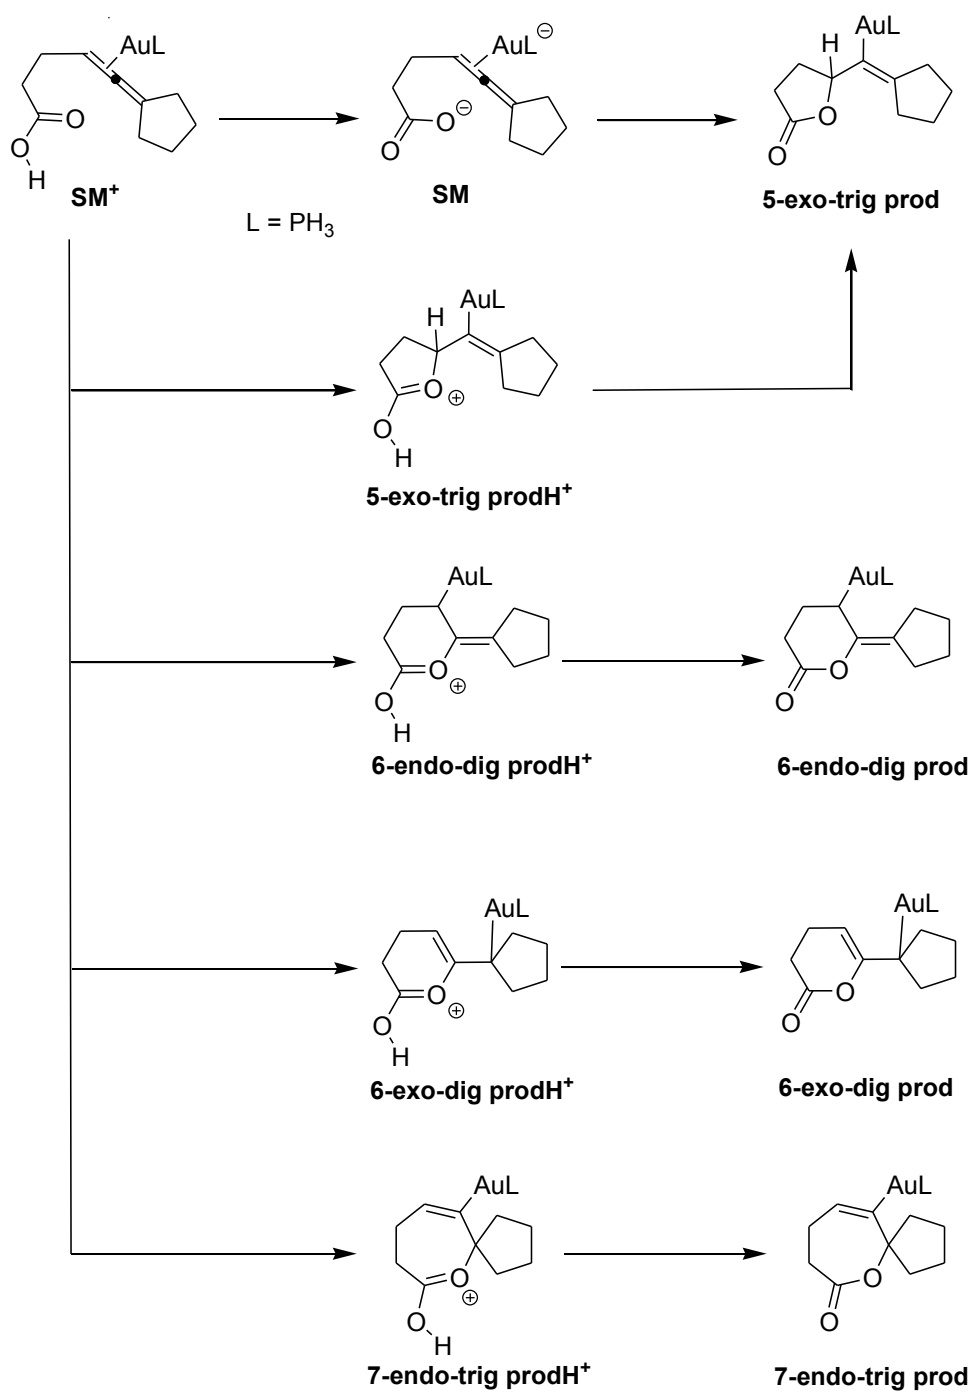

Fig S1. Possible reaction pathways.

Table S1. Relative free energies of transition states and products in the reaction of 6,6-cyclopentano-4,5-hexadienoic acid with  $\text{PH}_3\text{Au}^+$  from quantum calculations at 298K at M06/6-31+G(d,p)/SDD(Au) level and at PBE1PBE/6-31+G(d,p)/SDD(Au)/SMD(toluene) level. (All values in kcal/mol).

| Structure:                                               | M06/6-31+G(d,p)/SDD(Au) <sup>a,b</sup> |                                    | PBE1PBE/6-31+G(d,p)/SDD(Au)/SMD                          |
|----------------------------------------------------------|----------------------------------------|------------------------------------|----------------------------------------------------------|
|                                                          | $\Delta G_{q,298}^{\circ}$             | $\Delta G_{\text{CHCl}_3}^{\circ}$ | SMD geom <sup>c</sup><br>$\Delta G_{\text{tol}}^{\circ}$ |
| Au complexation to allene to form <b>SM</b> <sup>+</sup> | -42.72                                 | -18.28                             |                                                          |
| allene-gold complex, <b>SM</b> <sup>+</sup>              | 0.00                                   | 0.00                               | 0.00                                                     |
| <b>5-exo-trig TSH</b> <sup>+</sup>                       |                                        |                                    | 12.89                                                    |
| <b>6-endo-dig TSH</b> <sup>+</sup>                       | 11.71                                  | 16.87                              | 14.28                                                    |
| <b>6-exo-dig TSH</b> <sup>+</sup>                        | 21.85                                  | 25.86                              | 23.54                                                    |
| <b>7-endo-trig TSH</b> <sup>+</sup>                      | 12.81                                  |                                    |                                                          |
| <b>5-exo-trig prodH</b> <sup>+</sup>                     |                                        |                                    | 13.17                                                    |
| <b>6-endo-dig prodH</b> <sup>+</sup>                     | 9.95                                   | 14.87                              | 10.69                                                    |
| <b>6-exo-dig prodH</b> <sup>+</sup>                      | 21.99                                  | 25.25                              | 22.60                                                    |
| <b>7-endo-trig prodH</b> <sup>+</sup>                    | 12.70                                  | 17.04                              | 18.31                                                    |

a) Geometry optimized at the M06/6-31+G(d,p)/SDD(Au) level.

b) Solvation energy term from the difference in free energies of solvation from SMD model at M06/6-31+G(d,p)/SDD(Au) level in chloroform. (Ref. 9)

c) Geometry optimized at PBE1PBE/6-31+G(d,p)/SDD(Au)/SMD(toluene) level.

Table S2. Relative free energies of starting material and products in the reaction of 6,6-cyclopentano-4,5-hexadienoate with  $\text{PH}_3\text{Au}^+$  from quantum calculations at 298K at M06/6-31+G(d,p)/SDD(Au) level and at PBE1PBE/6-31+G(d,p)/SDD(Au)/SMD(toluene) level. (All values in kcal/mol).

| Structure:                                                                                                                    | M06/6-31+G(d,p)/SDD(Au) <sup>a,b</sup> |                                  |                               | PBE1PBE/6-31+G(d,p)/SDD(Au)/SMD at SMD geom in $\text{CH}_2\text{Cl}_2$ (in toluene) <sup>c</sup> |
|-------------------------------------------------------------------------------------------------------------------------------|----------------------------------------|----------------------------------|-------------------------------|---------------------------------------------------------------------------------------------------|
|                                                                                                                               | $\Delta G_{g,298}^\circ$               | $\Delta G_{\text{CHCl}_3}^\circ$ | $\Delta G_{\text{tol}}^\circ$ | $\Delta G_{\text{CH}_2\text{Cl}_2}^\circ$                                                         |
| extended allene-gold complex, <b>SM</b>                                                                                       | 0.00                                   | 0.00                             | 0.00                          | 0.00 (0.0)                                                                                        |
| <b>5-exo-trig prod</b>                                                                                                        | -56.89                                 | -24.90                           | -36.18                        | -22.12 (-34.61)                                                                                   |
| <b>6-endo-dig prod</b>                                                                                                        | -58.13                                 | -24.99                           | -36.85                        | -21.85 (-35.19)                                                                                   |
| <b>6-exo-dig prod</b>                                                                                                         | -53.69                                 | -20.07                           | -31.85                        | -16.00 (-29.33)                                                                                   |
| <b>7-endo-trig prod</b>                                                                                                       | -51.23                                 | -18.87                           | -30.07                        | -13.89 (26.28)                                                                                    |
| <b>SM</b> <sup>+</sup> + $\text{Et}_3\text{N}$ to <b>SM</b> + $\text{Et}_3\text{NH}^+$<br>(deprotonation step, see Figure S1) | 58.25                                  | 15.58                            | 29.30                         | 10.2 (27.0)                                                                                       |

a) Geometry optimized at the M06/6-31+G(d,p)/SDD(Au) level.

b) Free energies in solution combine the gas-phase free energies and the SMD free energies of solvation computed with gas-phase geometries at M06/6-31+G(d,p)/SDD(Au) level in chloroform and toluene. (Ref. 9).

c) Geometry optimized at PBE1PBE/6-31+G(d,p)/SDD(Au)/SMD( $\text{CH}_2\text{Cl}_2$ ) and PBE1PBE/6-31+G(d,p)/SDD(Au)/SMD(toluene) levels.

Table S3. Relative free energies and electronic energies of transition states and products in the reaction of 4,5-hexadienoic acid with  $\text{PH}_3\text{Au}^+$  from quantum calculations at 298K at M06/6-31+G(d,p)/SDD(Au) level. (All values in kcal/mol).<sup>a</sup>

| Structure:                                              | M06/6-31+G(d,p)/SDD(Au) <sup>b</sup> |                               |                    | M06/<br>ATZ-PP <sup>c</sup> |
|---------------------------------------------------------|--------------------------------------|-------------------------------|--------------------|-----------------------------|
|                                                         | $\Delta G_{q,298}^\circ$             | $\Delta G_{\text{THF}}^\circ$ | $\Delta E_e^\circ$ | $\Delta E_e^\circ$          |
| Au complexation to allene to form <b>SM<sup>+</sup></b> | -38.15                               |                               |                    |                             |
| allene-gold complex, <b>SM<sup>+</sup></b>              | 0.00                                 | 0.00                          | 0.00               | 0.00                        |
| <b>5-exo-trig TSH<sup>+</sup></b>                       | 9.98                                 | 14.04                         | 8.50               | 9.21                        |
| <b>6-endo-dig TSH<sup>+</sup></b>                       | 10.92                                | 16.97                         | 9.62               | 10.87                       |
| <b>6-exo-dig TSH<sup>+</sup></b>                        | 7.41                                 | 13.23                         | 6.43               | 7.41                        |
| <b>7-endo-trig TSH<sup>+</sup></b>                      | 13.02                                | 17.92                         | 11.11              | 12.13                       |
| <b>5-exo-trig prodH<sup>+</sup></b>                     | 10.56                                | 13.82                         | 7.81               | 8.12                        |
| <b>6-endo-dig prodH<sup>+</sup></b>                     | 8.57                                 | 14.48                         | 5.81               | 6.51                        |
| <b>6-exo-dig prodH<sup>+</sup></b>                      | 6.38                                 | 11.34                         | 4.23               | 4.59                        |
| <b>7-endo-trig prodH<sup>+</sup></b>                    | 12.70                                | 16.95                         | 9.33               | 9.87                        |

a) Geometries all optimized at the M06/6-31+G(d,p)/SDD(Au) level.

b) Solvation energy terms from the difference in free energies of solvation from SMD model at M06/6-31+G(d,p)/SDD(Au) level in tetrahydrofuran. (Ref. 9)

c) Electronic energy at M06/aug-cc-PVTZ-PP level (effective core potential on Au).

Table S4. Relative free energies of transition states and products in the reaction of 4,5-hexadienoate with  $\text{PH}_3\text{Au}^+$  from quantum calculations at 298K at M06/6-31+G(d,p)/SDD(Au) level and at PBE1PBE/6-31+G(d,p)/SDD(Au)/SMD( $\text{CH}_2\text{Cl}_2$ ) level. (All values in kcal/mol).

| Structure:                     | M06/6-31+G(d,p)/SDD(Au) <sup>a,b</sup> |                                  | PBE1PBE/6-31+G(d,p)/SDD(Au)/SMD                                    |
|--------------------------------|----------------------------------------|----------------------------------|--------------------------------------------------------------------|
|                                | $\Delta G_{g,298}^\circ$               | $\Delta G_{\text{CHCl}_3}^\circ$ | SMD geom <sup>c</sup><br>$\Delta G_{\text{CH}_2\text{Cl}_2}^\circ$ |
| allene-gold complex, <b>SM</b> | 0.00                                   | 0.00                             | 0.00                                                               |
| <b>5-exo-trig TS</b>           |                                        |                                  |                                                                    |
| <b>6-endo-dig TS</b>           | -0.77                                  |                                  | 6.0                                                                |
| <b>6-exo-dig TS</b>            | -1.53                                  |                                  | 2.9                                                                |
| <b>7-endo-trig TS</b>          | -0.7                                   |                                  | 5.7                                                                |
| <b>5-exo-trig prod</b>         | -50.75                                 | -20.38                           |                                                                    |
| <b>6-endo-dig prod</b>         | -49.17                                 | -17.75                           | -22.6                                                              |
| <b>6-exo-dig prod</b>          | -53.84                                 | -11.11                           |                                                                    |
| <b>7-endo-trig prod</b>        | -43.71                                 | -13.57                           | -19.8                                                              |

a) Geometry optimized at the M06/6-31+G(d,p)/SDD(Au) level.

b) Solvation energy terms from the difference in free energies of solvation from SMD model at M06/6-31+G(d,p)/SDD(Au) level in chloroform. (Ref. 9)

c) Geometry optimized at PBE1PBE/6-31+G(d,p)/SDD(Au)/SMD( $\text{CH}_2\text{Cl}_2$ ) level.



**Acknowledgments.** We are pleased to acknowledge support from the Center for Scientific Computing at the CNSI and MRL: an NSF MRSEC (DMR-1121053) and NSF CNS-0960316. We also acknowledge NSF support from the National Center for Supercomputing Applications (NSF TG-CHE100123) utilizing the NCSA Gordon and Blacklight systems, and the use of software for 3-D drawings from CYLview, 1.0b; Legault, C. Y., Université de Sherbrooke, 2009 (<http://www.cylview.org>).

## Part 2. References:

- <sup>1</sup> A. D. Becke *J. Chem. Phys.* **1993**, *98*, 5648.
- <sup>2</sup> Y. Zhao and D. G. Truhlar, *Theor. Chem. Acc.* **2008**, *120*, 215-241.
- <sup>3</sup> P. J. Hay and W. R. Wadt, *J. Chem. Phys.* **1985**, *82*, 299.
- <sup>4</sup> From EMSL Library of Basis Set Exchange: Schuchardt, K.L., Didier, B.T., Elsethagen, T., Sun, L., Gurumoorthi, V., Chase, J., Li, J., and Windus, T.L. *J. Chem. Inf. Model.* **2007**, *47*, 1045-1052.
- <sup>5</sup> K.A. Peterson and C. Puzzarini, *Theor. Chem. Acc.*, **2005**, *114*, 283.
- <sup>6</sup> (a) A. P. Scott, L. Radom *J. Phys. Chem.* **1996**, *100*, 16502. (b) Alecu, I. M.; Zheng, J.; Zhao, Y. and Truhlar, D. G. *J. Chem. Theory Comput.* **2010**, *6*, 2872–2887. (c) Raphael F. Ribeiro, Aleksandr V. Marenich, Christopher J. Cramer,\* and Donald G. Truhlar *J. Phys. Chem. A* **2011**, *115*, 14556-14562. (d) D. H. Aue, to be published. We have evaluated optimum scale factors for experimental fundamental frequencies for numerous organic molecules and find that the DFT scale factors differ with basis set between 0.96 for the B3LYP/6-31G(d) and M06-2X/ 6-311+G(d,p) levels to 0.97 for the B3LYP/ 6-311G(d,p) level. For thermal terms and entropies, such variation has little effect, and one may argue that a scaling factor close to 1.00 might be best for the dominant low frequencies (we get 1.005 for 111 frequencies below 150 cm<sup>-1</sup>)(see also ref. 6a). For zero point energies, the 0.99 scale factor fits experimental zero-point energies for organic molecules reasonably well.
- <sup>7</sup> C. Gonzalez, H. B. Schlegel *J. Phys. Chem.* **1990**, *94*, 5523.
- <sup>8</sup> Hill, J. G.; Peterson, K. A. *J. Chem. Theory Comput.* **2012**, *8*, 518–526.
- <sup>9</sup> A. V. Marenich, C. J. Cramer, and D. G. Truhlar, *J. Phys. Chem. B* **2009**, *113*, 6378-96.
- <sup>10</sup> a) K. S. Raymond, A. K. Grafton, R. A. Wheeler, *J. Phys. Chem. B* **1997**, *101*, 623 (and references therein); b) M. Namazian, P. Norouzi, *J. Electroanal. Chem.* **2004**, *573*, 49.
- <sup>11</sup> Li, X.; Millam, J. M.; Schlegel, H. B. *J. Chem. Phys.* **2000**, *113*, 10062-67.
- <sup>12</sup> H. B. Schlegel, S. S. Iyengar, X. Li, J. M. Millam, G. A. Voth, G. E. Scuseria, and M. J. Frisch, *J. Chem. Phys.* **2002**, *117*, 8694-704.
- <sup>13</sup> Gaussian 09, Revision A.1, M. J. Frisch, G. W. Trucks, H. B. Schlegel, G. E. Scuseria, M. A. Robb, J. R. Cheeseman, G. Scalmani, V. Barone, B. Mennucci, G. A. Petersson, H. Nakatsuji, M. Caricato, X. Li, H. P. Hratchian, A. F. Izmaylov, J. Bloino, G. Zheng, J. L. Sonnenberg, M. Hada, M. Ehara, K. Toyota, R. Fukuda, J. Hasegawa, M. Ishida, T. Nakajima, Y. Honda, O. Kitao, H. Nakai, T. Vreven, J. A. Montgomery, Jr., J. E. Peralta, F. Ogliaro, M. Bearpark, J. J. Heyd, E. Brothers, K. N. Kudin, V. N. Staroverov, R. Kobayashi, J. Normand, K. Raghavachari, A. Rendell, J. C. Burant, S. S. Iyengar, J. Tomasi, M. Cossi, N. Rega, J. M. Millam, M. Klene, J. E. Knox, J. B. Cross, V. Bakken, C. Adamo, J. Jaramillo, R. Gomperts, R. E. Stratmann, O. Yazyev, A. J. Austin, R. Cammi, C. Pomelli, J. W. Ochterski, R. L. Martin, K. Morokuma, V. G. Zakrzewski, G. A. Voth, P. Salvador, J. J. Dannenberg, S. Dapprich, A. D. Daniels, Ö. Farkas, J. B. Foresman, J. V. Ortiz, J. Cioslowski, and D. J. Fox, Gaussian, Inc., Wallingford CT, 2009.

- <sup>14</sup> (a) D. H. Aue, H. M. Webb, and M. T. Bowers, *J. Am. Chem. Soc.* **1976**, *98*, 318. (b) H. P. Hopkins Jr., D. V. Jahagirdar, S. P. Moulik, D. H. Aue, H. M. Webb, W. R. Davidson, and M. D. Pedley, *J. Am. Chem. Soc.* **1984**, *106*, 4341. (c) D. H. Aue, H. M. Webb, W. R. Davidson, P. Toure, H. P. Hopkins, Jr., S. P. Moulik, and D. V. Jahagirdar, *J. Am. Chem. Soc.* **1991**, *113*, 1770.
- <sup>15</sup> Reichardt, C. *Chem. Rev.* **1994**, *94*, 2319-2358.
- <sup>16</sup> Das, P. K.; Pramanik, R.; Bagchi, S. *Spectrochimica Acta A* **2003**, *59*, 1681-1688.
- <sup>17</sup> (a) Ye, L.; Wang, Y.; Aue, D. H.; Zhang, L. *J. Am. Chem. Soc.* **2012**, *134*, 31-34. (b) Lu, B.; Li, Y.; Wang, Y.; Aue, D. H.; Luo, Y.; Zhang, L. *J. Am. Chem. Soc.* **2012**, *135*, 8512-8524. (c) Wang, Y.; Yepremyan, A.; Ghorai, S.; Todd, R.; Aue, D. H.; Zhang, L. *Angew. Chem., Int. Ed.* **2013**, *52*, 7795-7799.
- <sup>18</sup> “Computational Mechanisms of Au and Pt Catalyzed Reactions”, *Topics in Current Chemistry* **2011** Soriano, E; Marco-Contelles, J., Eds., Springer, Berlin.
- <sup>19</sup> Brown, T. J.; Weber, D.; Gagné, M. R.; Widenhoefer, R. A. *J. Am. Chem. Soc.* **2012**, *134*, 9134–9137.
- <sup>20</sup> Roth, K. E.; Blum, S. A. *Organometallics* **2010**, *29*, 1712–1716.
- <sup>21</sup> (a) Dudnik, A. S.; Xia, Y.; Li, Y.; Gevorgyan, V. *J. Am. Chem. Soc.* **2010**, *132*, 7645–7655. (b) LaLonde, R. L.; Brenzovich, W. E. Jr.; Benitez, D.; Tkatchouk, E.; Kelley, K.; Goddard, W. A. III; Toste, F. D. *Chem. Sci.*, **2010**, *1*, 226–233.

### Part 3. Drawings of some structures

Figure S2. Structures of some intermediates and transition states.

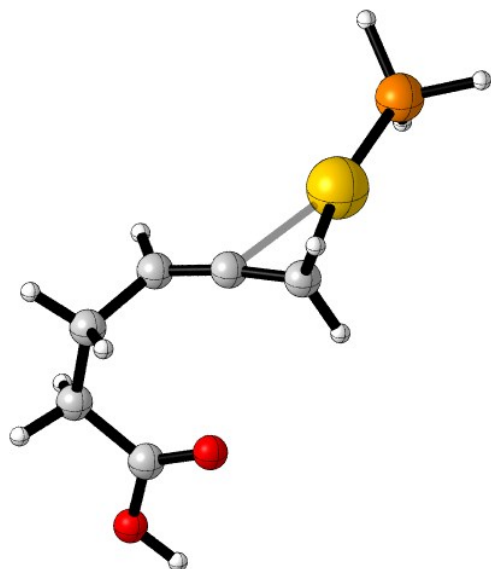

5,6-complex of PH<sub>3</sub>Au hexa-4,5-dienoic acid

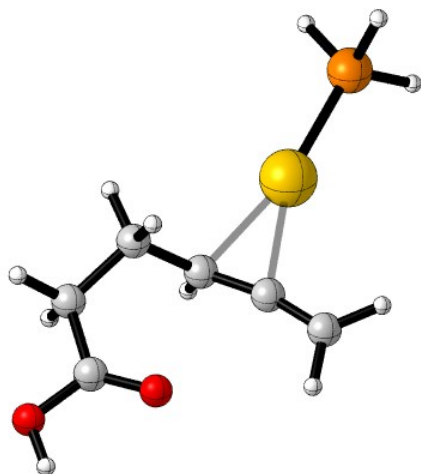

4,5-complex of PH<sub>3</sub>Au hexa-4,5-dienoic acid

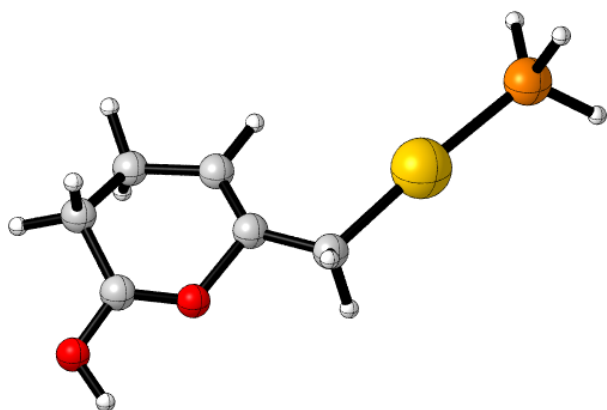

5,6-PH<sub>3</sub>Au complex of hexa-4,5-dienoic acid 6-exo-dig-ring closure product

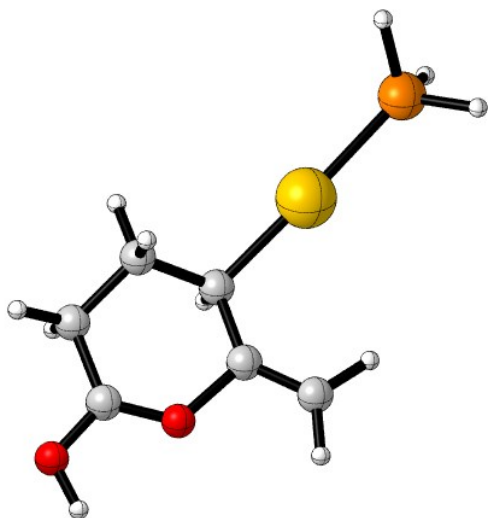

4,5-PH<sub>3</sub>Au complex of hexa-4,5-dienoic acid 6-endo-dig-ring closure product

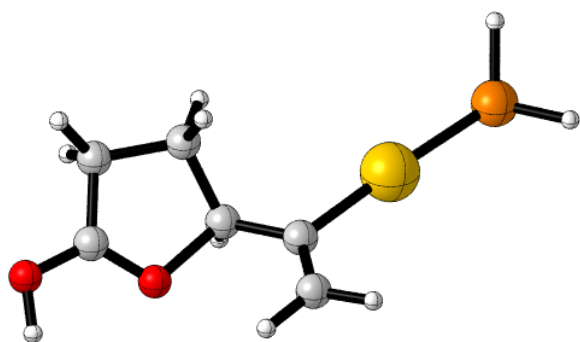

4,5-PH<sub>3</sub>Au complex of hexa-4,5-dienoic acid 5-exo-trig-ring closure product

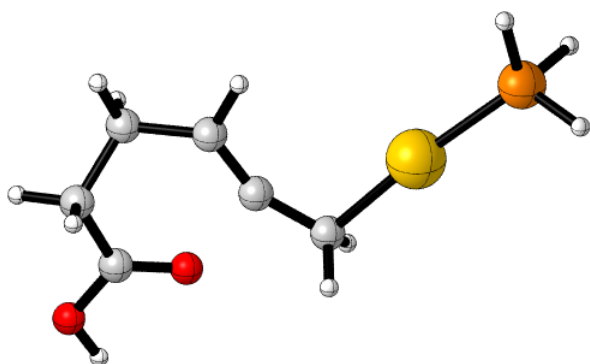

5,6-PH<sub>3</sub>Au complex of hexa-4,5-dienoic acid - 6-exo-dig-6-ring closure TS (-161.5 cm<sup>-1</sup>)

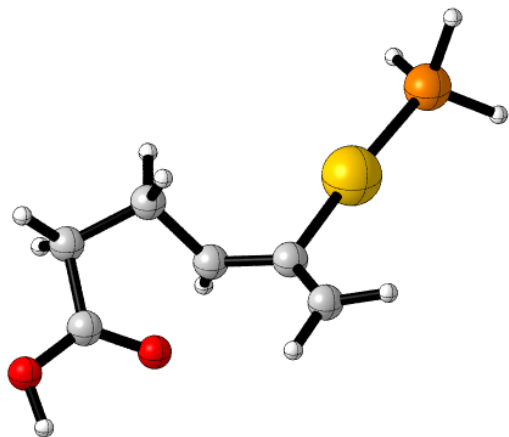

4,5-PH<sub>3</sub>Au complex of hexa-4,5-dienoic acid - 6-exo-trig-5-ring closure TS (-120.7 cm<sup>-1</sup>)

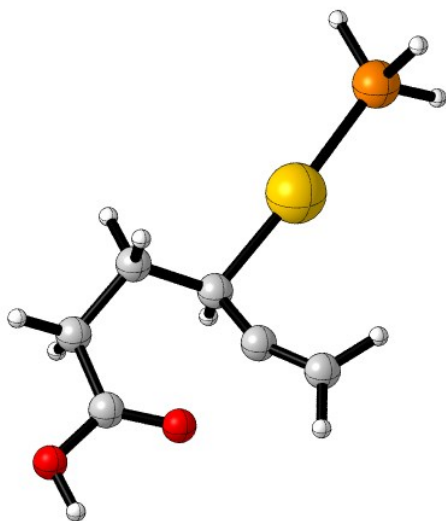

4,5-PH<sub>3</sub>Au complex of hexa-4,5-dienoic acid - 6-endo-dig-6-ring closure TS (-238.6 cm<sup>-1</sup>)

#### Part 4. Calculated geometries, thermochemical data, and vibrational frequencies

Table S5. Calculated geometries, thermochemical data, and vibrational frequencies.

SM for 4,5-Au-PH<sub>3</sub> complex of 6,6-cyclopentano-hexa-4,5-dienoic acid carboxylate:

Processing aupcphexdienoat5sm26psd1pbedcms.log

PG=C01

| Method   | BasisSet | Imaginary Freqs |
|----------|----------|-----------------|
| RPBE1PBE | GenECP   | 0               |

HF Energy

-1017.4850081

|    | ZPE       | E298      | S298      | Squasihar | Equasihar | Strans | Srot   |
|----|-----------|-----------|-----------|-----------|-----------|--------|--------|
|    | 149.83848 | 160.832   | 145.783   | 133.765   | 160.895   | 43.821 | 34.015 |
| 30 |           |           |           |           |           |        |        |
| C  | 4.463068  | -1.087985 | 0.511794  |           |           |        |        |
| C  | 3.118896  | -0.352773 | 0.595454  |           |           |        |        |
| C  | 2.149606  | -1.277045 | -0.116531 |           |           |        |        |
| C  | 2.826889  | -2.618640 | -0.365245 |           |           |        |        |
| C  | 4.068051  | -2.565699 | 0.532629  |           |           |        |        |
| C  | 0.913462  | -1.019947 | -0.484066 |           |           |        |        |
| C  | -0.358310 | -1.119318 | -0.944612 |           |           |        |        |
| C  | -1.501684 | -1.748135 | -0.186068 |           |           |        |        |
| C  | -2.831006 | -1.011546 | -0.358951 |           |           |        |        |
| C  | -3.957713 | -1.742756 | 0.399031  |           |           |        |        |
| O  | -4.668460 | -2.535223 | -0.272649 |           |           |        |        |
| Au | 0.005725  | 1.008074  | -0.200733 |           |           |        |        |
| P  | -0.261039 | 3.227495  | 0.403721  |           |           |        |        |
| O  | -4.045474 | -1.499745 | 1.631854  |           |           |        |        |
| H  | -0.885002 | 4.056859  | -0.543125 |           |           |        |        |
| H  | -1.024885 | 3.464966  | 1.558396  |           |           |        |        |
| H  | 0.921751  | 3.934407  | 0.679357  |           |           |        |        |
| H  | -0.537339 | -0.919923 | -2.006234 |           |           |        |        |
| H  | -1.243945 | -1.837120 | 0.873622  |           |           |        |        |
| H  | -1.600717 | -2.769053 | -0.584831 |           |           |        |        |
| H  | -3.077146 | -0.947819 | -1.425145 |           |           |        |        |
| H  | -2.727547 | 0.007337  | 0.035842  |           |           |        |        |
| H  | 2.164617  | -3.465601 | -0.164784 |           |           |        |        |
| H  | 3.125331  | -2.673860 | -1.420634 |           |           |        |        |
| H  | 3.136323  | 0.650179  | 0.158539  |           |           |        |        |
| H  | 2.806151  | -0.249757 | 1.643026  |           |           |        |        |
| H  | 3.803252  | -2.867063 | 1.553964  |           |           |        |        |
| H  | 4.863718  | -3.230776 | 0.182957  |           |           |        |        |
| H  | 4.960771  | -0.849970 | -0.436787 |           |           |        |        |

H 5.141932 -0.810236 1.323683

Population analysis using the SCF density.

| Label | Frequencies | IR Inten | Raman Activ | Depolar (P) | Depolar (U) | Dipole  |
|-------|-------------|----------|-------------|-------------|-------------|---------|
| A     | 3144.0345   | 47.7292  | 253.2427    | 0.7463      | 0.8547      | 27.6112 |
| A     | 3140.5554   | 38.8702  | 114.8955    | 0.4245      | 0.5960      |         |
| A     | 3140.2794   | 1.8068   | 210.2876    | 0.6876      | 0.8149      |         |
| A     | 3135.1224   | 39.2262  | 324.9062    | 0.2762      | 0.4329      |         |
| A     | 3132.6344   | 23.0715  | 298.7865    | 0.1643      | 0.2822      |         |
| A     | 3129.2874   | 11.7770  | 251.2478    | 0.2830      | 0.4412      |         |
| A     | 3112.4145   | 31.4808  | 293.4904    | 0.6730      | 0.8045      |         |
| A     | 3074.5815   | 54.9711  | 89.7868     | 0.5989      | 0.7491      |         |
| A     | 3071.2966   | 38.5918  | 319.4854    | 0.1244      | 0.2214      |         |
| A     | 3067.6557   | 3.3316   | 587.4611    | 0.0543      | 0.1030      |         |
| A     | 3065.6411   | 28.5672  | 203.5770    | 0.1607      | 0.2769      |         |
| A     | 3056.3776   | 57.0605  | 82.3918     | 0.0668      | 0.1252      |         |
| A     | 3046.0464   | 3.1439   | 723.4130    | 0.1268      | 0.2250      |         |
| A     | 2562.5348   | 0.2078   | 312.9224    | 0.7445      | 0.8535      |         |
| A     | 2560.5468   | 0.2929   | 314.5700    | 0.7425      | 0.8522      |         |
| A     | 2539.2924   | 11.2046  | 896.7178    | 0.0189      | 0.0371      |         |
| A     | 1964.8742   | 29.3198  | 81.5214     | 0.5611      | 0.7188      |         |
| A     | 1666.2646   | 987.2766 | 25.5582     | 0.5959      | 0.7468      |         |
| A     | 1489.5556   | 0.3886   | 2.9416      | 0.7458      | 0.8544      |         |
| A     | 1475.3138   | 8.5691   | 28.0912     | 0.7475      | 0.8555      |         |
| A     | 1471.1298   | 45.5524  | 17.2829     | 0.4729      | 0.6422      |         |
| A     | 1452.9033   | 10.7020  | 30.1714     | 0.6942      | 0.8195      |         |
| A     | 1449.5159   | 12.4493  | 8.7346      | 0.7157      | 0.8343      |         |
| A     | 1446.4868   | 25.0112  | 37.3552     | 0.6924      | 0.8183      |         |
| A     | 1432.5168   | 63.2409  | 38.8078     | 0.2072      | 0.3433      |         |
| A     | 1416.3718   | 376.5706 | 41.4359     | 0.7433      | 0.8528      |         |
| A     | 1350.0770   | 6.9972   | 2.7039      | 0.7339      | 0.8465      |         |
| A     | 1341.3399   | 2.2004   | 6.4179      | 0.2157      | 0.3548      |         |
| A     | 1331.3565   | 1.8322   | 4.8394      | 0.7406      | 0.8510      |         |
| A     | 1323.8598   | 4.1222   | 27.5291     | 0.6173      | 0.7633      |         |
| A     | 1296.2376   | 2.0431   | 6.9921      | 0.7120      | 0.8318      |         |
| A     | 1285.1179   | 8.5705   | 26.0429     | 0.4860      | 0.6541      |         |
| A     | 1252.3025   | 3.2297   | 25.1427     | 0.7108      | 0.8310      |         |
| A     | 1240.3418   | 8.3200   | 8.1795      | 0.3171      | 0.4815      |         |
| A     | 1233.1649   | 6.7354   | 7.3467      | 0.7342      | 0.8467      |         |
| A     | 1228.3055   | 9.1323   | 57.1371     | 0.1454      | 0.2539      |         |
| A     | 1169.3614   | 10.0746  | 8.5716      | 0.4927      | 0.6602      |         |
| A     | 1167.8889   | 3.9473   | 2.4576      | 0.6365      | 0.7779      |         |
| A     | 1145.2247   | 1.9626   | 2.1039      | 0.3667      | 0.5366      |         |
| A     | 1142.7224   | 1.0464   | 24.4544     | 0.4447      | 0.6156      |         |
| A     | 1115.1978   | 9.1382   | 38.2285     | 0.7477      | 0.8556      |         |
| A     | 1114.0927   | 9.0867   | 42.5666     | 0.7468      | 0.8550      |         |
| A     | 1068.4439   | 5.0393   | 5.9009      | 0.5426      | 0.7035      |         |



|   |           |          |         |        |        |
|---|-----------|----------|---------|--------|--------|
| A | 1064.1796 | 8.5168   | 20.0424 | 0.2854 | 0.4441 |
| A | 1042.4007 | 4.7982   | 28.9614 | 0.6881 | 0.8152 |
| A | 1033.4355 | 5.4610   | 13.8667 | 0.2549 | 0.4062 |
| A | 991.9707  | 26.8381  | 16.9489 | 0.5502 | 0.7099 |
| A | 974.4935  | 226.8749 | 29.3539 | 0.7471 | 0.8552 |
| A | 970.4028  | 11.4723  | 3.4266  | 0.7433 | 0.8527 |
| A | 928.6320  | 10.8509  | 34.7065 | 0.0539 | 0.1023 |
| A | 927.4547  | 46.6606  | 35.1068 | 0.2192 | 0.3596 |
| A | 917.3651  | 1.3294   | 2.2516  | 0.6902 | 0.8167 |
| A | 890.9760  | 26.6162  | 15.6479 | 0.7358 | 0.8478 |
| A | 876.3082  | 4.7533   | 3.5753  | 0.4864 | 0.6545 |
| A | 847.8483  | 8.6112   | 32.0790 | 0.1756 | 0.2988 |
| A | 782.8250  | 7.6437   | 6.3016  | 0.0856 | 0.1577 |
| A | 769.7159  | 10.9080  | 8.4757  | 0.4790 | 0.6477 |
| A | 719.5607  | 15.5426  | 14.3994 | 0.0935 | 0.1710 |
| A | 664.3594  | 44.7681  | 3.0339  | 0.6946 | 0.8198 |
| A | 584.8911  | 6.9557   | 7.1549  | 0.5160 | 0.6808 |
| A | 565.3080  | 12.1213  | 5.7435  | 0.6857 | 0.8136 |
| A | 552.7341  | 40.5186  | 22.0946 | 0.4357 | 0.6070 |
| A | 499.5909  | 1.4026   | 1.7293  | 0.7500 | 0.8571 |
| A | 484.6605  | 0.6203   | 0.8226  | 0.7476 | 0.8556 |
| A | 477.3253  | 0.9179   | 15.4290 | 0.3361 | 0.5031 |
| A | 457.2664  | 1.7914   | 2.4498  | 0.6924 | 0.8183 |
| A | 396.4475  | 7.5428   | 8.7516  | 0.5619 | 0.7195 |
| A | 371.6554  | 17.5142  | 39.5445 | 0.2727 | 0.4285 |
| A | 308.6586  | 6.5045   | 11.6048 | 0.3455 | 0.5135 |
| A | 262.8628  | 0.3448   | 2.7242  | 0.3976 | 0.5690 |
| A | 237.4039  | 17.8842  | 7.4596  | 0.7500 | 0.8571 |
| A | 199.5231  | 7.8977   | 2.1256  | 0.4105 | 0.5821 |
| A | 183.8538  | 8.8521   | 4.7187  | 0.4669 | 0.6365 |
| A | 166.7698  | 3.5910   | 9.4917  | 0.5016 | 0.6681 |
| A | 102.6262  | 5.9004   | 1.4906  | 0.7348 | 0.8471 |
| A | 91.9598   | 0.0609   | 0.0210  | 0.6731 | 0.8046 |
| A | 88.7824   | 1.3852   | 0.7894  | 0.4194 | 0.5909 |
| A | 78.5907   | 1.6220   | 0.8819  | 0.6617 | 0.7964 |
| A | 65.0798   | 2.7442   | 3.5392  | 0.7488 | 0.8564 |
| A | 58.8202   | 3.2346   | 0.9237  | 0.6611 | 0.7960 |
| A | 43.9501   | 16.6392  | 1.3633  | 0.7190 | 0.8365 |
| A | 35.8227   | 9.2033   | 1.9025  | 0.7479 | 0.8558 |
| A | 28.2244   | 3.6856   | 3.6376  | 0.7405 | 0.8509 |
| A | 20.5361   | 1.0803   | 0.9494  | 0.7492 | 0.8566 |

5-exo-trig prod for 4,5-Au-PH3 complex of 6,6-cyclopentano-hexa-4,5-dienoic acid carboxylate:

Processing aupcphexdienoat5prod6psdm6.log

PG=C01

|        |          |                 |
|--------|----------|-----------------|
| Method | BasisSet | Imaginary Freqs |
| RM06   | GenECP   | 0               |

HF Energy  
-1017.8854422

|           |         |         |           |           |        |        |
|-----------|---------|---------|-----------|-----------|--------|--------|
| ZPE       | E298    | S298    | Squasihar | Equasihar | Strans | Srot   |
| 150.42131 | 160.671 | 137.449 | 128.374   | 160.720   | 43.821 | 33.781 |

30

|    |           |           |           |
|----|-----------|-----------|-----------|
| C  | 1.066144  | 1.362538  | 0.004219  |
| C  | 0.545418  | 0.130332  | -0.127553 |
| Au | -1.494717 | -0.194573 | -0.057197 |
| P  | -3.853012 | -0.574948 | 0.006143  |
| C  | 1.364971  | -1.120516 | -0.236500 |
| C  | 1.690615  | -1.783106 | 1.107766  |
| C  | 2.972537  | -2.536109 | 0.798789  |
| C  | 3.605893  | -1.701609 | -0.294616 |
| O  | 4.753181  | -1.709014 | -0.661645 |
| O  | 2.669256  | -0.905704 | -0.845808 |
| H  | -4.334278 | -1.859777 | -0.321806 |
| H  | -4.558152 | -0.388572 | 1.214106  |
| H  | -4.686327 | 0.184347  | -0.842186 |
| C  | 0.240958  | 2.627832  | 0.166667  |
| C  | 2.533395  | 1.771397  | 0.024063  |
| H  | 0.857018  | -1.846486 | -0.891981 |
| H  | 1.865212  | -0.999710 | 1.857676  |
| H  | 0.864311  | -2.407621 | 1.462558  |
| H  | 3.667162  | -2.659386 | 1.633511  |
| H  | 2.776999  | -3.534070 | 0.381861  |
| C  | 2.525726  | 3.237545  | 0.463592  |
| H  | 3.148057  | 1.132996  | 0.670304  |
| H  | 2.959559  | 1.673429  | -0.984328 |
| C  | 1.216554  | 3.770544  | -0.112239 |
| H  | -0.645352 | 2.633049  | -0.479605 |
| H  | -0.119208 | 2.696551  | 1.207021  |
| H  | 2.494414  | 3.302630  | 1.561832  |
| H  | 3.411453  | 3.789680  | 0.129123  |
| H  | 1.322524  | 3.915824  | -1.197564 |
| H  | 0.901676  | 4.727232  | 0.320411  |

WARNING: Geometry optimization converged in opt job, but not in freq job

Population analysis using the SCF density.

|       |             |          |             |             |             |        |
|-------|-------------|----------|-------------|-------------|-------------|--------|
| Label | Frequencies | IR Inten | Raman Activ | Depolar (P) | Depolar (U) | Dipole |
| A     | 3136.4032   | 7.7048   | 94.7296     | 0.4832      | 0.6516      | 9.7738 |

|   |           |          |          |        |        |
|---|-----------|----------|----------|--------|--------|
| A | 3117.3616 | 14.7994  | 45.9868  | 0.3345 | 0.5013 |
| A | 3098.9988 | 42.7392  | 144.1793 | 0.6871 | 0.8145 |
| A | 3094.0187 | 53.5109  | 173.5717 | 0.3510 | 0.5196 |
| A | 3088.5066 | 23.3411  | 95.4378  | 0.2786 | 0.4358 |
| A | 3080.8062 | 23.9358  | 36.6293  | 0.2370 | 0.3832 |
| A | 3051.2643 | 23.3125  | 22.7852  | 0.7482 | 0.8560 |
| A | 3047.2641 | 6.0542   | 158.7008 | 0.0673 | 0.1262 |
| A | 3039.9025 | 15.6879  | 106.5308 | 0.0740 | 0.1377 |
| A | 3027.3763 | 46.9670  | 58.8713  | 0.4435 | 0.6145 |
| A | 3018.7409 | 40.9215  | 180.7187 | 0.0933 | 0.1707 |
| A | 3003.2348 | 24.4149  | 76.9540  | 0.1811 | 0.3067 |
| A | 2995.9499 | 19.8879  | 92.9868  | 0.1267 | 0.2250 |
| A | 2496.9926 | 15.8983  | 133.9523 | 0.7498 | 0.8570 |
| A | 2493.6999 | 19.2593  | 150.4897 | 0.6884 | 0.8154 |
| A | 2481.5663 | 112.7523 | 701.5440 | 0.1013 | 0.1840 |
| A | 1887.2468 | 549.9499 | 12.9062  | 0.5336 | 0.6959 |
| A | 1701.2850 | 19.5040  | 76.8850  | 0.2484 | 0.3980 |
| A | 1476.0653 | 2.0322   | 0.8996   | 0.7188 | 0.8364 |
| A | 1462.5573 | 7.8767   | 3.2669   | 0.7465 | 0.8548 |
| A | 1460.4086 | 7.4250   | 12.8950  | 0.7463 | 0.8547 |
| A | 1438.7962 | 6.4083   | 4.4556   | 0.6810 | 0.8103 |
| A | 1432.3242 | 4.0925   | 9.5117   | 0.7478 | 0.8557 |
| A | 1431.3492 | 8.4038   | 5.6326   | 0.6221 | 0.7671 |
| A | 1377.4735 | 5.0370   | 8.0978   | 0.2120 | 0.3498 |
| A | 1344.2934 | 67.4587  | 9.1207   | 0.7493 | 0.8567 |
| A | 1330.9369 | 4.8725   | 2.5107   | 0.3807 | 0.5515 |
| A | 1320.4507 | 0.2430   | 3.3396   | 0.5914 | 0.7432 |
| A | 1310.3757 | 2.8311   | 6.6541   | 0.7378 | 0.8491 |
| A | 1306.3140 | 97.6906  | 4.0132   | 0.4029 | 0.5744 |
| A | 1287.7047 | 1.4001   | 4.4878   | 0.3782 | 0.5489 |
| A | 1285.3600 | 7.5866   | 1.5437   | 0.7349 | 0.8472 |
| A | 1245.8050 | 13.3275  | 13.6669  | 0.5593 | 0.7174 |
| A | 1236.1163 | 64.5277  | 10.0418  | 0.4430 | 0.6140 |
| A | 1228.2478 | 5.1044   | 3.4415   | 0.6859 | 0.8137 |
| A | 1208.2083 | 152.3642 | 7.0771   | 0.3876 | 0.5586 |
| A | 1191.4193 | 18.2430  | 15.6444  | 0.1173 | 0.2100 |
| A | 1179.1773 | 1.5531   | 2.7042   | 0.6207 | 0.7659 |
| A | 1145.8310 | 45.7867  | 6.4796   | 0.0627 | 0.1180 |
| A | 1133.4144 | 4.5102   | 14.2783  | 0.7195 | 0.8369 |
| A | 1131.5480 | 5.5763   | 2.9888   | 0.3994 | 0.5708 |
| A | 1129.6168 | 3.6445   | 18.9014  | 0.7314 | 0.8449 |
| A | 1104.0639 | 34.6267  | 19.5583  | 0.4613 | 0.6313 |
| A | 1069.3880 | 35.4820  | 3.6124   | 0.6380 | 0.7790 |
| A | 1053.8973 | 35.9169  | 7.1205   | 0.3200 | 0.4848 |
| A | 1038.6681 | 1.4854   | 11.3457  | 0.5695 | 0.7257 |
| A | 1016.0689 | 206.0075 | 28.8757  | 0.6741 | 0.8053 |
| A | 1009.2122 | 7.6951   | 3.4158   | 0.7053 | 0.8272 |

|   |          |         |         |        |        |
|---|----------|---------|---------|--------|--------|
| A | 995.7032 | 11.6190 | 4.3465  | 0.3054 | 0.4679 |
| A | 976.3816 | 15.0356 | 3.2383  | 0.3269 | 0.4927 |
| A | 940.2613 | 73.0472 | 6.8982  | 0.2379 | 0.3844 |
| A | 929.3069 | 0.7489  | 11.4716 | 0.0939 | 0.1717 |
| A | 907.7246 | 0.0429  | 0.6280  | 0.4116 | 0.5831 |
| A | 879.0701 | 0.6502  | 8.3355  | 0.1805 | 0.3058 |
| A | 867.4051 | 0.9805  | 1.3482  | 0.7447 | 0.8537 |
| A | 853.0807 | 1.4889  | 5.8185  | 0.2052 | 0.3406 |
| A | 820.2242 | 2.0656  | 17.7966 | 0.1770 | 0.3007 |
| A | 815.1145 | 7.8736  | 3.2983  | 0.3191 | 0.4838 |
| A | 714.0186 | 11.6075 | 9.5122  | 0.1019 | 0.1849 |
| A | 674.4740 | 13.9963 | 2.6541  | 0.4107 | 0.5823 |
| A | 632.5733 | 0.1384  | 0.9519  | 0.7116 | 0.8315 |
| A | 593.3235 | 1.0574  | 0.8051  | 0.7402 | 0.8507 |
| A | 559.6793 | 1.7798  | 1.0206  | 0.4466 | 0.6174 |
| A | 533.4124 | 5.4244  | 1.2664  | 0.4168 | 0.5884 |
| A | 516.6461 | 7.3849  | 1.6947  | 0.7071 | 0.8284 |
| A | 477.5407 | 5.4509  | 2.1783  | 0.2207 | 0.3615 |
| A | 419.6410 | 0.5918  | 1.4292  | 0.4583 | 0.6286 |
| A | 415.6496 | 0.6675  | 1.8582  | 0.4232 | 0.5948 |
| A | 367.7429 | 9.4461  | 3.2704  | 0.1209 | 0.2157 |
| A | 302.5689 | 1.8502  | 1.3737  | 0.7421 | 0.8519 |
| A | 275.1916 | 0.4504  | 0.7588  | 0.1986 | 0.3314 |
| A | 259.7593 | 1.0341  | 0.3360  | 0.7052 | 0.8271 |
| A | 248.9163 | 0.2689  | 12.4692 | 0.1498 | 0.2606 |
| A | 179.6850 | 1.4170  | 1.0158  | 0.6607 | 0.7957 |
| A | 165.7487 | 4.1847  | 1.3997  | 0.2429 | 0.3909 |
| A | 141.2622 | 2.1604  | 0.8153  | 0.5293 | 0.6922 |
| A | 116.6708 | 0.3499  | 0.1544  | 0.3299 | 0.4962 |
| A | 94.8479  | 0.9207  | 0.3322  | 0.6762 | 0.8069 |
| A | 85.2097  | 0.8820  | 0.3291  | 0.6460 | 0.7850 |
| A | 59.7058  | 5.4680  | 2.5288  | 0.7435 | 0.8529 |
| A | 50.0672  | 2.5529  | 1.0241  | 0.7492 | 0.8566 |
| A | 45.3571  | 0.4082  | 0.9512  | 0.6545 | 0.7912 |
| A | 36.9474  | 0.2374  | 0.2955  | 0.6496 | 0.7876 |
| A | 24.6185  | 2.3291  | 0.8564  | 0.7310 | 0.8446 |

Processing aupcphexdienoat5prod6psd1pbedcms.log  
PG=C01

Method BasisSet Imaginary Freqs  
RPBE1PBE GenECP 0

HF Energy  
-1017.5249201

|  |           |         |         |           |           |        |        |
|--|-----------|---------|---------|-----------|-----------|--------|--------|
|  | ZPE       | E298    | S298    | Squasihar | Equasihar | Strans | Srot   |
|  | 151.84527 | 161.953 | 136.125 | 127.711   | 161.999   | 43.821 | 33.788 |

30

|    |           |           |           |
|----|-----------|-----------|-----------|
| C  | 1.068615  | 1.425057  | 0.026758  |
| C  | 0.559502  | 0.185884  | -0.128686 |
| Au | -1.466071 | -0.184392 | -0.055899 |
| P  | -3.758184 | -0.623316 | 0.006121  |
| C  | 1.364445  | -1.065977 | -0.319113 |
| C  | 1.485796  | -1.955622 | 0.927647  |
| C  | 2.769796  | -2.727171 | 0.660906  |
| C  | 3.563383  | -1.780043 | -0.205732 |
| O  | 4.749803  | -1.814922 | -0.460657 |
| O  | 2.759896  | -0.836997 | -0.711992 |
| H  | -4.171375 | -1.946438 | -0.242680 |
| H  | -4.451066 | -0.371380 | 1.206455  |
| H  | -4.584539 | 0.066319  | -0.902406 |
| C  | 0.215154  | 2.667875  | 0.248230  |
| C  | 2.528706  | 1.880028  | 0.004138  |
| H  | 0.937778  | -1.651971 | -1.144083 |
| H  | 1.592053  | -1.323408 | 1.816061  |
| H  | 0.604545  | -2.587702 | 1.057500  |
| H  | 3.341467  | -3.007000 | 1.548265  |
| H  | 2.590958  | -3.637504 | 0.073612  |
| C  | 2.493962  | 3.363223  | 0.397557  |
| H  | 3.168160  | 1.284494  | 0.662311  |
| H  | 2.939532  | 1.765565  | -1.006654 |
| C  | 1.131471  | 3.840706  | -0.105801 |
| H  | -0.715459 | 2.640800  | -0.327602 |
| H  | -0.065636 | 2.736945  | 1.310430  |
| H  | 2.533812  | 3.463475  | 1.490641  |
| H  | 3.335175  | 3.930897  | -0.014794 |
| H  | 1.163757  | 3.976097  | -1.195465 |
| H  | 0.810643  | 4.789087  | 0.338428  |

WARNING: Geometry optimization converged in opt job, but not in freq job

Population analysis using the SCF density.

| Label | Frequencies | IR Inten | Raman Activ | Depolar (P) | Depolar (U) | Dipole  |
|-------|-------------|----------|-------------|-------------|-------------|---------|
| A     | 3169.6904   | 14.0004  | 170.9651    | 0.6911      | 0.8173      | 13.0535 |
| A     | 3163.0937   | 12.0967  | 186.7098    | 0.2623      | 0.4156      |         |
| A     | 3128.9804   | 59.4679  | 239.1762    | 0.6831      | 0.8117      |         |
| A     | 3123.0037   | 60.1669  | 257.1699    | 0.7419      | 0.8518      |         |
| A     | 3117.3049   | 37.7793  | 212.0460    | 0.1738      | 0.2961      |         |
| A     | 3115.7189   | 72.9136  | 413.2311    | 0.2283      | 0.3717      |         |
| A     | 3093.8789   | 27.5400  | 107.6441    | 0.1441      | 0.2519      |         |
| A     | 3084.6000   | 8.1396   | 320.7159    | 0.1015      | 0.1842      |         |
| A     | 3070.4515   | 25.4805  | 317.3280    | 0.0896      | 0.1644      |         |

S252

|   |           |          |           |        |        |
|---|-----------|----------|-----------|--------|--------|
| A | 3060.8502 | 27.9147  | 350.0846  | 0.1847 | 0.3118 |
| A | 3058.2819 | 68.7035  | 88.4271   | 0.7078 | 0.8289 |
| A | 3056.1714 | 55.0356  | 427.6548  | 0.1165 | 0.2087 |
| A | 3031.1349 | 32.1430  | 295.7937  | 0.1336 | 0.2357 |
| A | 2530.2860 | 8.3465   | 319.4453  | 0.7495 | 0.8568 |
| A | 2529.1045 | 9.0907   | 336.7982  | 0.7481 | 0.8559 |
| A | 2513.9833 | 63.0994  | 1162.7460 | 0.0457 | 0.0875 |
| A | 1825.7553 | 809.6191 | 29.4867   | 0.4443 | 0.6152 |
| A | 1698.0284 | 25.6539  | 243.5885  | 0.2522 | 0.4029 |
| A | 1488.4678 | 0.6506   | 2.0035    | 0.5517 | 0.7111 |
| A | 1476.1317 | 9.1578   | 11.3902   | 0.7348 | 0.8471 |
| A | 1473.0984 | 7.3135   | 29.5990   | 0.7491 | 0.8566 |
| A | 1454.7292 | 10.4423  | 14.0031   | 0.7448 | 0.8537 |
| A | 1448.9041 | 7.3563   | 16.0570   | 0.6417 | 0.7817 |
| A | 1439.1274 | 12.5885  | 17.3052   | 0.7402 | 0.8507 |
| A | 1387.7114 | 18.5670  | 18.3867   | 0.2192 | 0.3596 |
| A | 1356.8614 | 85.7420  | 26.8719   | 0.7236 | 0.8396 |
| A | 1342.3110 | 4.8108   | 5.7313    | 0.3158 | 0.4800 |
| A | 1332.3075 | 1.0153   | 4.0319    | 0.6757 | 0.8065 |
| A | 1324.8920 | 140.7617 | 7.1606    | 0.3705 | 0.5407 |
| A | 1320.9213 | 3.2559   | 13.1103   | 0.6952 | 0.8202 |
| A | 1299.8236 | 21.2311  | 1.9689    | 0.7263 | 0.8415 |
| A | 1295.9385 | 1.6373   | 12.0458   | 0.6331 | 0.7753 |
| A | 1256.4708 | 121.8441 | 30.1137   | 0.4507 | 0.6214 |
| A | 1250.0174 | 21.3515  | 13.2518   | 0.7416 | 0.8516 |
| A | 1234.7606 | 4.2300   | 9.6451    | 0.7359 | 0.8479 |
| A | 1214.6715 | 243.9037 | 11.0601   | 0.6350 | 0.7768 |
| A | 1193.4498 | 3.0595   | 27.3819   | 0.0657 | 0.1233 |
| A | 1187.1556 | 4.3913   | 7.9522    | 0.6836 | 0.8121 |
| A | 1159.5584 | 50.6868  | 8.2080    | 0.2600 | 0.4127 |
| A | 1141.6898 | 7.6319   | 5.2951    | 0.1976 | 0.3300 |
| A | 1122.7433 | 9.1473   | 37.9334   | 0.7235 | 0.8396 |
| A | 1120.5298 | 9.3059   | 43.1282   | 0.7432 | 0.8527 |
| A | 1101.5859 | 32.5744  | 39.7016   | 0.4919 | 0.6594 |
| A | 1076.2004 | 33.9462  | 7.9478    | 0.7452 | 0.8540 |
| A | 1045.7639 | 83.7894  | 30.9282   | 0.3304 | 0.4966 |
| A | 1043.0933 | 10.0267  | 31.1309   | 0.7178 | 0.8357 |
| A | 1019.9055 | 1.1878   | 7.9791    | 0.5866 | 0.7394 |
| A | 1003.2440 | 36.5814  | 2.8024    | 0.2943 | 0.4548 |
| A | 993.9584  | 225.4884 | 81.5081   | 0.7231 | 0.8393 |
| A | 978.0057  | 30.7088  | 3.9348    | 0.4760 | 0.6450 |
| A | 946.6381  | 129.8963 | 12.1383   | 0.1834 | 0.3099 |
| A | 932.7352  | 3.6142   | 24.6983   | 0.1072 | 0.1936 |
| A | 919.5096  | 0.2805   | 2.9827    | 0.3885 | 0.5596 |
| A | 881.3375  | 6.4654   | 16.1626   | 0.1745 | 0.2971 |
| A | 874.0448  | 5.5899   | 3.2538    | 0.5977 | 0.7482 |
| A | 859.0537  | 4.2144   | 7.8801    | 0.2345 | 0.3799 |

|   |          |         |         |        |        |
|---|----------|---------|---------|--------|--------|
| A | 828.8545 | 4.5912  | 31.1947 | 0.1058 | 0.1913 |
| A | 819.7872 | 20.7345 | 3.8202  | 0.2674 | 0.4220 |
| A | 721.1756 | 16.5140 | 12.1313 | 0.1159 | 0.2078 |
| A | 674.2847 | 37.6904 | 13.0624 | 0.4269 | 0.5984 |
| A | 639.0223 | 0.2633  | 2.9334  | 0.7153 | 0.8340 |
| A | 606.3023 | 5.0154  | 4.1669  | 0.6925 | 0.8183 |
| A | 569.9399 | 2.3569  | 2.9056  | 0.4794 | 0.6481 |
| A | 540.6106 | 5.4024  | 3.8116  | 0.2513 | 0.4016 |
| A | 529.7889 | 15.6907 | 4.2625  | 0.7489 | 0.8564 |
| A | 488.7266 | 5.1124  | 2.4713  | 0.4453 | 0.6162 |
| A | 466.7071 | 0.0481  | 1.7896  | 0.5273 | 0.6905 |
| A | 463.1325 | 2.5623  | 7.1339  | 0.3996 | 0.5710 |
| A | 366.9616 | 19.5509 | 6.6010  | 0.1959 | 0.3276 |
| A | 299.0051 | 3.2315  | 2.9036  | 0.6225 | 0.7673 |
| A | 292.6666 | 1.0374  | 13.7204 | 0.1347 | 0.2374 |
| A | 265.4554 | 1.1566  | 1.7670  | 0.1879 | 0.3163 |
| A | 244.6324 | 2.5534  | 6.0711  | 0.1372 | 0.2413 |
| A | 186.5233 | 6.9038  | 2.1773  | 0.6884 | 0.8155 |
| A | 166.4947 | 1.5785  | 0.9503  | 0.7500 | 0.8571 |
| A | 142.5557 | 3.3522  | 1.4146  | 0.6544 | 0.7911 |
| A | 116.8720 | 0.4677  | 0.3891  | 0.6473 | 0.7859 |
| A | 89.3767  | 3.7264  | 0.6570  | 0.7439 | 0.8532 |
| A | 78.4131  | 3.2988  | 1.0224  | 0.7238 | 0.8398 |
| A | 70.7273  | 0.2893  | 0.2011  | 0.7484 | 0.8561 |
| A | 64.7428  | 4.8156  | 2.8494  | 0.7464 | 0.8548 |
| A | 51.6850  | 3.0197  | 0.6828  | 0.7498 | 0.8570 |
| A | 47.5445  | 1.4271  | 0.7189  | 0.6210 | 0.7662 |
| A | 17.6595  | 6.4339  | 0.7740  | 0.7157 | 0.8343 |

6-endo-dig prod for 4,5-Au-PH3 complex of 6,6-cyclopentano-hexa-4,5-dienoic acid carboxylate:

Processing aupcphexdienoat6prod6psdm6.log  
PG=C01

| Method | BasisSet | Imaginary Freqs |
|--------|----------|-----------------|
| RM06   | GenECP   | 0               |

HF Energy  
-1017.8876449

| ZPE       | E298     | S298      | Squasihar | Equasihar | Strans | Srot   |
|-----------|----------|-----------|-----------|-----------|--------|--------|
| 150.37809 | 160.515  | 135.392   | 127.377   | 160.563   | 43.821 | 33.687 |
| 30        |          |           |           |           |        |        |
| C         | 1.988720 | 1.061497  | -0.043291 |           |        |        |
| C         | 1.526396 | -0.195453 | -0.039916 |           |        |        |
| C         | 0.419466 | -0.740887 | -0.875178 |           |        |        |

|    |           |           |           |
|----|-----------|-----------|-----------|
| C  | 0.503286  | -2.266348 | -1.004379 |
| C  | 1.960234  | -2.711900 | -0.874954 |
| C  | 2.440800  | -2.332061 | 0.497234  |
| O  | 3.026423  | -3.055223 | 1.263342  |
| Au | -1.443944 | -0.088140 | -0.119205 |
| P  | -3.540138 | 0.649074  | 0.783289  |
| O  | 2.118807  | -1.070578 | 0.881954  |
| H  | -4.222118 | 1.709639  | 0.149728  |
| H  | -4.605971 | -0.272274 | 0.856864  |
| H  | -3.584648 | 1.130290  | 2.109005  |
| C  | 1.409115  | 2.164995  | -0.890184 |
| C  | 3.107948  | 1.602802  | 0.808955  |
| H  | 0.497654  | -0.284451 | -1.872656 |
| H  | -0.078796 | -2.776977 | -0.225265 |
| H  | 0.077852  | -2.586989 | -1.962484 |
| H  | 2.101160  | -3.790033 | -0.992305 |
| H  | 2.576948  | -2.197953 | -1.627586 |
| C  | 2.052760  | 3.437469  | -0.325913 |
| H  | 1.681566  | 2.031757  | -1.950875 |
| H  | 0.306862  | 2.183778  | -0.858751 |
| C  | 3.417348  | 2.959873  | 0.169866  |
| H  | 2.766524  | 1.738778  | 1.848551  |
| H  | 3.971040  | 0.928883  | 0.856753  |
| H  | 3.902156  | 3.663098  | 0.856748  |
| H  | 4.091668  | 2.820131  | -0.688170 |
| H  | 2.111195  | 4.253571  | -1.055327 |
| H  | 1.462315  | 3.802189  | 0.527810  |

Population analysis using the SCF density.

| Label | Frequencies | IR Inten | Dipole |
|-------|-------------|----------|--------|
| A     | 3127.3749   | 17.4269  | 8.2974 |
| A     | 3098.6337   | 45.1524  |        |
| A     | 3093.7411   | 54.5674  |        |
| A     | 3092.5455   | 25.2540  |        |
| A     | 3089.7917   | 23.9469  |        |
| A     | 3039.2963   | 3.9541   |        |
| A     | 3038.7652   | 24.0212  |        |
| A     | 3029.9062   | 47.3516  |        |
| A     | 3029.2831   | 26.6693  |        |
| A     | 3024.0553   | 25.9417  |        |
| A     | 3013.2196   | 19.0541  |        |
| A     | 3001.1641   | 30.1173  |        |
| A     | 2981.0054   | 29.7985  |        |
| A     | 2500.4131   | 14.9512  |        |
| A     | 2498.5184   | 16.4169  |        |
| A     | 2483.2550   | 122.3795 |        |
| A     | 1873.3771   | 533.1264 |        |



|   |           |          |
|---|-----------|----------|
| A | 1753.1369 | 97.6053  |
| A | 1476.4603 | 3.5559   |
| A | 1469.6531 | 6.0997   |
| A | 1459.4066 | 6.9001   |
| A | 1447.1943 | 5.3032   |
| A | 1443.5202 | 2.6270   |
| A | 1437.8040 | 23.3733  |
| A | 1349.5603 | 85.9086  |
| A | 1341.5989 | 23.5298  |
| A | 1332.5894 | 21.5373  |
| A | 1327.0023 | 14.2589  |
| A | 1318.0470 | 0.0481   |
| A | 1310.0201 | 23.7028  |
| A | 1298.3343 | 11.5195  |
| A | 1278.7659 | 40.7485  |
| A | 1256.5231 | 118.3757 |
| A | 1240.5039 | 1.4081   |
| A | 1221.7214 | 4.6143   |
| A | 1204.2769 | 16.9407  |
| A | 1191.6686 | 7.0091   |
| A | 1175.4166 | 116.1425 |
| A | 1158.0658 | 162.4659 |
| A | 1132.3262 | 4.1951   |
| A | 1131.0038 | 2.5613   |
| A | 1129.7370 | 1.9133   |
| A | 1084.2853 | 4.7943   |
| A | 1081.1117 | 41.6889  |
| A | 1037.2373 | 2.3407   |
| A | 1023.5939 | 9.4095   |
| A | 1017.4762 | 189.3099 |
| A | 1007.1596 | 29.6974  |
| A | 986.0354  | 12.8759  |
| A | 963.7605  | 1.2486   |
| A | 953.3128  | 10.7527  |
| A | 922.2352  | 0.7685   |
| A | 918.7428  | 2.7530   |
| A | 905.2069  | 1.0689   |
| A | 868.7761  | 4.0793   |
| A | 866.9164  | 0.2481   |
| A | 821.2067  | 2.0082   |
| A | 763.5595  | 0.7265   |
| A | 703.7316  | 1.1721   |
| A | 672.0118  | 19.0801  |
| A | 637.7437  | 0.3736   |
| A | 612.1519  | 9.6139   |
| A | 554.5769  | 1.4671   |
| A | 516.6785  | 8.6861   |

|   |          |        |
|---|----------|--------|
| A | 482.4747 | 1.4585 |
| A | 441.7711 | 1.1649 |
| A | 413.3041 | 1.6191 |
| A | 407.8868 | 1.9375 |
| A | 372.4668 | 2.1831 |
| A | 338.5910 | 3.7008 |
| A | 319.4682 | 0.9591 |
| A | 263.2321 | 0.2379 |
| A | 245.6969 | 2.5156 |
| A | 204.3578 | 2.4514 |
| A | 187.9313 | 0.4376 |
| A | 144.4661 | 1.0649 |
| A | 130.8926 | 2.7518 |
| A | 92.1995  | 0.7898 |
| A | 82.5772  | 0.1107 |
| A | 69.5858  | 3.7476 |
| A | 62.5027  | 1.6061 |
| A | 50.8246  | 0.1997 |
| A | 37.8423  | 2.1861 |
| A | 26.7431  | 1.6269 |

Processing aupcphexdienoat6prod6psd1pbedcms.log  
PG=C01

| Method   | BasisSet | Imaginary Freqs |
|----------|----------|-----------------|
| RPBE1PBE | GenECP   | 0               |

HF Energy  
-1017.5246673

|    | ZPE       | E298      | S298      | Squasihar | Equasihar | Strans | Srot   |
|----|-----------|-----------|-----------|-----------|-----------|--------|--------|
|    | 151.77127 | 161.724   | 133.863   | 126.558   | 161.763   | 43.821 | 33.688 |
| 30 |           |           |           |           |           |        |        |
| C  | 2.024361  | 1.024908  | -0.044745 |           |           |        |        |
| C  | 1.514000  | -0.215502 | -0.045670 |           |           |        |        |
| C  | 0.376306  | -0.732380 | -0.863789 |           |           |        |        |
| C  | 0.439360  | -2.261876 | -1.013495 |           |           |        |        |
| C  | 1.888997  | -2.744410 | -0.892117 |           |           |        |        |
| C  | 2.383017  | -2.372490 | 0.472596  |           |           |        |        |
| O  | 2.962276  | -3.108678 | 1.245547  |           |           |        |        |
| Au | -1.460663 | -0.056098 | -0.104637 |           |           |        |        |
| P  | -3.504118 | 0.680647  | 0.753761  |           |           |        |        |
| O  | 2.101518  | -1.113896 | 0.868525  |           |           |        |        |
| H  | -4.127745 | 1.778157  | 0.128759  |           |           |        |        |
| H  | -4.572916 | -0.236807 | 0.761133  |           |           |        |        |
| H  | -3.539142 | 1.108303  | 2.095441  |           |           |        |        |

|   |           |           |           |
|---|-----------|-----------|-----------|
| C | 1.476905  | 2.154207  | -0.885624 |
| C | 3.174917  | 1.525248  | 0.799637  |
| H | 0.469361  | -0.277006 | -1.858716 |
| H | -0.153096 | -2.775996 | -0.248040 |
| H | 0.022885  | -2.560780 | -1.980508 |
| H | 1.997023  | -3.824432 | -1.013998 |
| H | 2.516450  | -2.244716 | -1.643254 |
| C | 2.166925  | 3.405755  | -0.322458 |
| H | 1.739891  | 2.015653  | -1.945517 |
| H | 0.379689  | 2.209237  | -0.843359 |
| C | 3.518174  | 2.884178  | 0.173755  |
| H | 2.856401  | 1.661443  | 1.844663  |
| H | 4.023201  | 0.832640  | 0.819902  |
| H | 4.013453  | 3.564735  | 0.874418  |
| H | 4.193206  | 2.738340  | -0.680165 |
| H | 2.257266  | 4.211743  | -1.058304 |
| H | 1.590115  | 3.796315  | 0.526350  |

WARNING: Geometry optimization converged in opt job, but not in freq job

Population analysis using the SCF density.

| Label | Frequencies | IR Inten | Raman Activ | Depolar (P) | Depolar (U) | Dipole  |
|-------|-------------|----------|-------------|-------------|-------------|---------|
| A     | 3160.4914   | 22.5345  | 338.4139    | 0.4228      | 0.5943      | 10.8983 |
| A     | 3129.7340   | 30.8686  | 265.4925    | 0.3765      | 0.5470      |         |
| A     | 3128.5308   | 83.3465  | 260.6405    | 0.7440      | 0.8532      |         |
| A     | 3122.1753   | 68.7059  | 411.6399    | 0.3377      | 0.5049      |         |
| A     | 3112.0073   | 40.6305  | 322.3525    | 0.2706      | 0.4260      |         |
| A     | 3075.8350   | 29.6375  | 49.7728     | 0.4406      | 0.6117      |         |
| A     | 3071.9485   | 52.7996  | 149.1493    | 0.0605      | 0.1142      |         |
| A     | 3067.4068   | 3.0141   | 464.3070    | 0.0489      | 0.0932      |         |
| A     | 3064.6455   | 59.0510  | 83.7015     | 0.5773      | 0.7320      |         |
| A     | 3060.8235   | 35.0914  | 221.0245    | 0.1810      | 0.3065      |         |
| A     | 3055.1908   | 25.4451  | 389.6120    | 0.4467      | 0.6176      |         |
| A     | 3030.5161   | 38.5437  | 634.2656    | 0.0945      | 0.1726      |         |
| A     | 3025.2287   | 59.6779  | 288.8783    | 0.1061      | 0.1918      |         |
| A     | 2529.8654   | 7.4789   | 282.5285    | 0.7495      | 0.8568      |         |
| A     | 2527.7426   | 10.0410  | 328.8056    | 0.7019      | 0.8249      |         |
| A     | 2511.4694   | 72.3003  | 1267.5407   | 0.0549      | 0.1041      |         |
| A     | 1814.9583   | 731.6183 | 173.0550    | 0.1195      | 0.2135      |         |
| A     | 1746.6282   | 232.5943 | 1079.3458   | 0.2333      | 0.3784      |         |
| A     | 1490.8851   | 1.9412   | 2.9823      | 0.7072      | 0.8285      |         |
| A     | 1483.1260   | 10.6079  | 23.0362     | 0.7254      | 0.8409      |         |
| A     | 1474.1132   | 7.1985   | 31.2001     | 0.7469      | 0.8551      |         |
| A     | 1462.4819   | 5.9357   | 29.5613     | 0.5486      | 0.7085      |         |
| A     | 1459.5912   | 5.8120   | 13.8782     | 0.6724      | 0.8041      |         |
| A     | 1450.7594   | 33.4693  | 18.9207     | 0.7287      | 0.8431      |         |
| A     | 1361.6956   | 189.6251 | 14.6446     | 0.1199      | 0.2141      |         |

|   |           |          |          |        |        |
|---|-----------|----------|----------|--------|--------|
| A | 1348.9686 | 27.4325  | 28.0964  | 0.2965 | 0.4573 |
| A | 1344.6619 | 24.3202  | 4.5177   | 0.7358 | 0.8478 |
| A | 1337.4843 | 7.7456   | 11.0811  | 0.5178 | 0.6823 |
| A | 1329.4018 | 0.9628   | 8.5574   | 0.5949 | 0.7460 |
| A | 1313.9234 | 25.6928  | 6.0084   | 0.4463 | 0.6172 |
| A | 1304.7067 | 38.6638  | 23.6538  | 0.7269 | 0.8418 |
| A | 1292.3302 | 98.6585  | 5.9292   | 0.7257 | 0.8410 |
| A | 1258.6708 | 74.3450  | 37.7935  | 0.7124 | 0.8321 |
| A | 1247.3162 | 2.3682   | 50.0059  | 0.6785 | 0.8084 |
| A | 1231.5060 | 6.0660   | 16.0523  | 0.7400 | 0.8505 |
| A | 1202.8351 | 41.0334  | 3.4525   | 0.4206 | 0.5921 |
| A | 1195.1652 | 12.4875  | 81.5636  | 0.4556 | 0.6260 |
| A | 1175.6925 | 32.3836  | 16.3047  | 0.7264 | 0.8415 |
| A | 1160.2392 | 337.5483 | 97.8978  | 0.1130 | 0.2030 |
| A | 1142.0202 | 1.7843   | 2.1793   | 0.6937 | 0.8192 |
| A | 1124.0716 | 12.3026  | 41.0309  | 0.7010 | 0.8242 |
| A | 1120.8125 | 8.4426   | 38.6493  | 0.7426 | 0.8523 |
| A | 1093.3790 | 27.0836  | 275.8681 | 0.1942 | 0.3252 |
| A | 1079.4438 | 137.4578 | 178.9165 | 0.4393 | 0.6104 |
| A | 1043.6702 | 4.6856   | 28.2503  | 0.7315 | 0.8449 |
| A | 1036.6336 | 8.5384   | 13.1378  | 0.3021 | 0.4640 |
| A | 1012.4653 | 17.7327  | 158.3161 | 0.3097 | 0.4730 |
| A | 992.6764  | 96.7297  | 64.1986  | 0.4683 | 0.6379 |
| A | 987.1703  | 193.3058 | 41.5206  | 0.7391 | 0.8500 |
| A | 969.3067  | 10.8795  | 14.4302  | 0.2412 | 0.3886 |
| A | 956.7693  | 15.7115  | 128.0888 | 0.1888 | 0.3177 |
| A | 926.8045  | 0.9490   | 5.0300   | 0.3066 | 0.4693 |
| A | 924.5017  | 7.0994   | 27.9906  | 0.0854 | 0.1573 |
| A | 919.9924  | 3.4185   | 5.2236   | 0.6148 | 0.7615 |
| A | 876.9908  | 5.2899   | 3.9891   | 0.5485 | 0.7084 |
| A | 873.1882  | 0.9545   | 8.5192   | 0.2098 | 0.3468 |
| A | 831.1110  | 5.4300   | 8.4645   | 0.0877 | 0.1613 |
| A | 772.3821  | 0.7144   | 12.4494  | 0.2696 | 0.4247 |
| A | 710.6703  | 2.7696   | 7.3632   | 0.1896 | 0.3188 |
| A | 681.9165  | 27.8322  | 20.7377  | 0.3633 | 0.5329 |
| A | 646.7602  | 0.8082   | 4.3358   | 0.2749 | 0.4312 |
| A | 619.8910  | 16.6120  | 40.4335  | 0.1603 | 0.2763 |
| A | 566.8974  | 5.1731   | 1.5312   | 0.7337 | 0.8464 |
| A | 521.1776  | 13.9115  | 5.8681   | 0.5344 | 0.6966 |
| A | 490.7142  | 3.0699   | 7.6426   | 0.7126 | 0.8322 |
| A | 471.8670  | 1.0489   | 8.7727   | 0.4721 | 0.6414 |
| A | 455.4517  | 1.5094   | 3.1293   | 0.4642 | 0.6341 |
| A | 425.7907  | 2.9117   | 6.7689   | 0.5020 | 0.6685 |
| A | 378.8879  | 5.7284   | 4.7085   | 0.6380 | 0.7790 |
| A | 340.1687  | 8.2278   | 8.3503   | 0.1453 | 0.2537 |
| A | 322.9496  | 2.8730   | 6.6192   | 0.3609 | 0.5304 |
| A | 287.6987  | 0.7189   | 33.2019  | 0.1705 | 0.2913 |

|   |          |        |        |        |        |
|---|----------|--------|--------|--------|--------|
| A | 267.8031 | 0.4281 | 2.6928 | 0.2101 | 0.3473 |
| A | 202.3511 | 5.4209 | 4.2590 | 0.0864 | 0.1590 |
| A | 188.5129 | 2.2303 | 2.4129 | 0.7409 | 0.8511 |
| A | 147.8086 | 1.7918 | 2.9638 | 0.6652 | 0.7990 |
| A | 130.0635 | 5.2237 | 1.8355 | 0.6990 | 0.8228 |
| A | 98.8673  | 0.6632 | 1.4689 | 0.7096 | 0.8301 |
| A | 90.0205  | 0.3185 | 0.5616 | 0.7083 | 0.8292 |
| A | 83.4531  | 0.5876 | 2.3152 | 0.7464 | 0.8548 |
| A | 73.7675  | 4.4675 | 1.0368 | 0.6903 | 0.8168 |
| A | 57.9719  | 4.9857 | 0.9762 | 0.6781 | 0.8082 |
| A | 41.2257  | 4.8627 | 2.2713 | 0.7264 | 0.8415 |
| A | 18.7182  | 2.2316 | 3.9797 | 0.7461 | 0.8546 |

6-exo-dig prod for 4,5-Au-PH3 complex of 6,6-cyclopentano-hexa-4,5-dienoic acid carboxylate:

Processing aupcphexdienoat6xprod6psdm6.log  
PG=C01

|        |          |                 |
|--------|----------|-----------------|
| Method | BasisSet | Imaginary Freqs |
| RM06   | GenECP   | 0               |

HF Energy  
-1017.8802510

|    | ZPE       | E298      | S298      | Squasihar | Equasihar | Strans | Srot   |
|----|-----------|-----------|-----------|-----------|-----------|--------|--------|
|    | 150.35641 | 160.497   | 133.737   | 127.990   | 160.531   | 43.821 | 33.396 |
| 30 |           |           |           |           |           |        |        |
| O  | 2.895399  | 0.430635  | -0.172516 |           |           |        |        |
| C  | 1.655512  | -0.228507 | -0.126202 |           |           |        |        |
| C  | 1.617463  | -1.564180 | -0.197863 |           |           |        |        |
| C  | 2.872236  | -2.376822 | -0.258589 |           |           |        |        |
| C  | 3.976515  | -1.639187 | 0.486001  |           |           |        |        |
| C  | 4.074371  | -0.202133 | 0.055226  |           |           |        |        |
| C  | 0.536177  | 0.757732  | -0.045765 |           |           |        |        |
| Au | -1.358356 | -0.206071 | -0.000457 |           |           |        |        |
| P  | -3.533154 | -1.225144 | 0.051580  |           |           |        |        |
| O  | 5.102212  | 0.414161  | -0.065013 |           |           |        |        |
| H  | -3.639030 | -2.631991 | 0.009791  |           |           |        |        |
| H  | -4.452868 | -0.918606 | -0.973955 |           |           |        |        |
| H  | -4.372735 | -0.988109 | 1.160985  |           |           |        |        |
| C  | 0.661261  | 1.697735  | 1.168323  |           |           |        |        |
| C  | 0.561161  | 1.783212  | -1.195779 |           |           |        |        |
| H  | 0.645865  | -2.050678 | -0.207543 |           |           |        |        |
| H  | 2.718774  | -3.366562 | 0.187316  |           |           |        |        |
| H  | 3.172530  | -2.557032 | -1.303385 |           |           |        |        |
| H  | 3.743408  | -1.629486 | 1.561557  |           |           |        |        |

|   |           |           |           |
|---|-----------|-----------|-----------|
| H | 4.964915  | -2.090380 | 0.364668  |
| C | -0.335601 | 2.925600  | -0.706445 |
| H | 1.593057  | 2.149525  | -1.321274 |
| H | 0.245365  | 1.365385  | -2.160013 |
| C | -0.264823 | 2.874433  | 0.839119  |
| H | 0.423273  | 1.212423  | 2.123474  |
| H | 1.702350  | 2.055174  | 1.233177  |
| H | -1.264729 | 2.704077  | 1.262344  |
| H | 0.103818  | 3.812004  | 1.271864  |
| H | -1.369502 | 2.771726  | -1.046351 |
| H | -0.013537 | 3.893611  | -1.108184 |

Population analysis using the SCF density.

| Label | Frequencies | IR Inten | Raman Activ | Depolar (P) | Depolar (U) | Dipole |
|-------|-------------|----------|-------------|-------------|-------------|--------|
| A     | 3195.6901   | 13.4882  | 77.4463     | 0.2113      | 0.3489      | 9.2892 |
| A     | 3131.3350   | 13.1599  | 135.8199    | 0.4122      | 0.5838      |        |
| A     | 3097.1430   | 86.6301  | 163.2962    | 0.4053      | 0.5768      |        |
| A     | 3082.4215   | 3.5773   | 76.9092     | 0.7304      | 0.8442      |        |
| A     | 3081.3805   | 22.1511  | 118.6329    | 0.4222      | 0.5938      |        |
| A     | 3079.0273   | 2.9021   | 125.5295    | 0.4919      | 0.6594      |        |
| A     | 3073.7944   | 41.3689  | 9.3583      | 0.6829      | 0.8116      |        |
| A     | 3035.1387   | 64.4756  | 170.8019    | 0.0574      | 0.1085      |        |
| A     | 3033.8135   | 12.8411  | 66.4800     | 0.1964      | 0.3284      |        |
| A     | 3023.0128   | 22.7936  | 40.3323     | 0.7500      | 0.8571      |        |
| A     | 3010.2667   | 42.5851  | 256.5637    | 0.1345      | 0.2371      |        |
| A     | 3005.6628   | 37.1365  | 220.3549    | 0.1629      | 0.2801      |        |
| A     | 3003.3663   | 38.9157  | 104.8644    | 0.2746      | 0.4309      |        |
| A     | 2498.3673   | 17.4646  | 134.7562    | 0.7307      | 0.8444      |        |
| A     | 2495.1544   | 20.3897  | 145.9143    | 0.5779      | 0.7325      |        |
| A     | 2480.7739   | 109.3360 | 619.7231    | 0.0926      | 0.1695      |        |
| A     | 1875.0066   | 493.8536 | 16.8433     | 0.4331      | 0.6045      |        |
| A     | 1743.3616   | 54.0600  | 73.1052     | 0.2405      | 0.3877      |        |
| A     | 1484.8475   | 4.2830   | 3.0061      | 0.7499      | 0.8571      |        |
| A     | 1464.5691   | 7.6192   | 7.3470      | 0.7499      | 0.8571      |        |
| A     | 1461.0152   | 10.7119  | 8.8925      | 0.7324      | 0.8455      |        |
| A     | 1460.2933   | 6.2715   | 16.7263     | 0.5227      | 0.6866      |        |
| A     | 1450.5886   | 0.0371   | 13.6523     | 0.7500      | 0.8571      |        |
| A     | 1432.0373   | 18.8637  | 7.0816      | 0.7498      | 0.8570      |        |
| A     | 1362.8849   | 98.0281  | 2.4857      | 0.6374      | 0.7786      |        |
| A     | 1335.6831   | 9.1075   | 23.2616     | 0.2019      | 0.3360      |        |
| A     | 1333.0675   | 5.7274   | 10.8066     | 0.1695      | 0.2898      |        |
| A     | 1319.4658   | 0.0245   | 0.6859      | 0.7498      | 0.8570      |        |
| A     | 1309.6521   | 7.6162   | 15.6077     | 0.3629      | 0.5326      |        |
| A     | 1299.6003   | 42.7946  | 34.9034     | 0.5481      | 0.7081      |        |
| A     | 1288.5508   | 0.1292   | 0.8039      | 0.7476      | 0.8556      |        |
| A     | 1253.6676   | 50.3200  | 9.6342      | 0.2549      | 0.4063      |        |
| A     | 1238.6134   | 18.1932  | 5.6676      | 0.7183      | 0.8361      |        |

|   |           |          |         |        |        |
|---|-----------|----------|---------|--------|--------|
| A | 1238.5090 | 151.9928 | 5.4454  | 0.2527 | 0.4035 |
| A | 1220.0733 | 114.5241 | 36.2465 | 0.2574 | 0.4094 |
| A | 1197.8876 | 21.7814  | 58.0422 | 0.3801 | 0.5508 |
| A | 1194.0844 | 1.5179   | 1.3688  | 0.7260 | 0.8413 |
| A | 1165.4628 | 183.7787 | 12.8235 | 0.7237 | 0.8397 |
| A | 1157.2053 | 10.8474  | 3.7301  | 0.5809 | 0.7349 |
| A | 1132.9713 | 3.6753   | 16.7616 | 0.7500 | 0.8571 |
| A | 1132.6899 | 3.0909   | 15.9354 | 0.7498 | 0.8570 |
| A | 1106.9336 | 0.1125   | 4.3612  | 0.7497 | 0.8570 |
| A | 1071.2103 | 132.2683 | 3.4733  | 0.6763 | 0.8069 |
| A | 1064.7819 | 0.4750   | 11.5225 | 0.5805 | 0.7346 |
| A | 1037.1823 | 3.1877   | 1.6932  | 0.3356 | 0.5025 |
| A | 1036.7582 | 1.4578   | 1.6665  | 0.3293 | 0.4955 |
| A | 1021.8545 | 215.1361 | 15.3400 | 0.7500 | 0.8571 |
| A | 997.8921  | 26.5058  | 3.2753  | 0.4160 | 0.5876 |
| A | 977.2194  | 6.9823   | 46.6056 | 0.5353 | 0.6973 |
| A | 967.9178  | 1.5707   | 0.4226  | 0.6395 | 0.7801 |
| A | 950.0146  | 12.7421  | 1.9495  | 0.1193 | 0.2132 |
| A | 944.9362  | 16.2660  | 8.9662  | 0.5160 | 0.6807 |
| A | 910.8087  | 4.3061   | 46.5571 | 0.2540 | 0.4050 |
| A | 897.8274  | 0.0368   | 10.2646 | 0.4671 | 0.6367 |
| A | 825.7154  | 0.4195   | 1.0032  | 0.6745 | 0.8056 |
| A | 800.9871  | 1.1728   | 10.5890 | 0.1167 | 0.2090 |
| A | 793.5116  | 7.3346   | 2.3378  | 0.3064 | 0.4691 |
| A | 759.2199  | 8.9811   | 5.3089  | 0.6965 | 0.8211 |
| A | 733.8417  | 9.4725   | 16.9600 | 0.3355 | 0.5024 |
| A | 662.8936  | 2.0492   | 2.9369  | 0.1729 | 0.2948 |
| A | 655.0362  | 3.5690   | 10.0242 | 0.1101 | 0.1983 |
| A | 617.2459  | 0.1531   | 1.1741  | 0.6800 | 0.8095 |
| A | 587.4575  | 7.7200   | 17.6114 | 0.2039 | 0.3388 |
| A | 535.4023  | 6.4318   | 6.2316  | 0.2621 | 0.4153 |
| A | 490.2373  | 3.8767   | 2.1295  | 0.2509 | 0.4011 |
| A | 469.1163  | 2.0149   | 10.9085 | 0.4237 | 0.5952 |
| A | 418.1918  | 0.6231   | 0.8405  | 0.7096 | 0.8301 |
| A | 416.3015  | 0.6790   | 0.9522  | 0.7487 | 0.8563 |
| A | 341.2723  | 1.5739   | 4.7296  | 0.2069 | 0.3428 |
| A | 312.5658  | 0.8726   | 1.4653  | 0.4998 | 0.6665 |
| A | 283.4933  | 1.2373   | 0.5763  | 0.6583 | 0.7939 |
| A | 244.0969  | 1.6926   | 9.7416  | 0.2021 | 0.3362 |
| A | 212.5946  | 0.6640   | 0.3737  | 0.6338 | 0.7759 |
| A | 200.2102  | 2.9258   | 3.2373  | 0.2914 | 0.4513 |
| A | 189.7370  | 1.9771   | 4.5407  | 0.2059 | 0.3415 |
| A | 131.2936  | 2.9763   | 0.5176  | 0.6992 | 0.8230 |
| A | 119.5661  | 0.0746   | 0.0826  | 0.6921 | 0.8180 |
| A | 108.0431  | 0.0178   | 0.0649  | 0.7495 | 0.8568 |
| A | 99.6207   | 1.6654   | 0.3574  | 0.5671 | 0.7238 |
| A | 85.7623   | 0.2972   | 0.8642  | 0.7386 | 0.8497 |

|   |         |        |        |        |        |
|---|---------|--------|--------|--------|--------|
| A | 81.9346 | 0.0311 | 0.1769 | 0.7288 | 0.8432 |
| A | 58.6770 | 3.6332 | 0.9010 | 0.7428 | 0.8524 |
| A | 54.0457 | 1.6769 | 2.0589 | 0.7490 | 0.8565 |
| A | 24.2960 | 1.3780 | 0.3380 | 0.7485 | 0.8562 |

Processing aupcphexdienoat6xprod6psd1pbedcms.log  
PG=C01

|          |          |                 |
|----------|----------|-----------------|
| Method   | BasisSet | Imaginary Freqs |
| RPBE1PBE | GenECP   | 0               |

HF Energy  
-1017.5148216

|    | ZPE       | E298      | S298      | Squasihar | Equasihar | Strans | Srot   |
|----|-----------|-----------|-----------|-----------|-----------|--------|--------|
|    | 151.55061 | 161.574   | 132.975   | 127.159   | 161.608   | 43.821 | 33.383 |
| 30 |           |           |           |           |           |        |        |
| O  | 2.888812  | 0.434308  | -0.164773 |           |           |        |        |
| C  | 1.639263  | -0.226188 | -0.139435 |           |           |        |        |
| C  | 1.610530  | -1.561428 | -0.234065 |           |           |        |        |
| C  | 2.868367  | -2.372157 | -0.292467 |           |           |        |        |
| C  | 3.969179  | -1.645794 | 0.472323  |           |           |        |        |
| C  | 4.053803  | -0.199982 | 0.080300  |           |           |        |        |
| C  | 0.512884  | 0.755929  | -0.055844 |           |           |        |        |
| Au | -1.363375 | -0.208253 | -0.001051 |           |           |        |        |
| P  | -3.457857 | -1.243770 | 0.076545  |           |           |        |        |
| O  | 5.082213  | 0.438944  | 0.000663  |           |           |        |        |
| H  | -3.493719 | -2.652209 | 0.090182  |           |           |        |        |
| H  | -4.361478 | -0.988743 | -0.973788 |           |           |        |        |
| H  | -4.286487 | -0.969976 | 1.182550  |           |           |        |        |
| C  | 0.650211  | 1.704556  | 1.158197  |           |           |        |        |
| C  | 0.548785  | 1.788434  | -1.207655 |           |           |        |        |
| H  | 0.641463  | -2.049807 | -0.259207 |           |           |        |        |
| H  | 2.709572  | -3.363026 | 0.144176  |           |           |        |        |
| H  | 3.176825  | -2.538289 | -1.335393 |           |           |        |        |
| H  | 3.739696  | -1.661038 | 1.547456  |           |           |        |        |
| H  | 4.955344  | -2.094070 | 0.335592  |           |           |        |        |
| C  | -0.344777 | 2.937632  | -0.718582 |           |           |        |        |
| H  | 1.579324  | 2.155006  | -1.333690 |           |           |        |        |
| H  | 0.228957  | 1.378178  | -2.171893 |           |           |        |        |
| C  | -0.277066 | 2.884181  | 0.829073  |           |           |        |        |
| H  | 0.411604  | 1.227366  | 2.115250  |           |           |        |        |
| H  | 1.689317  | 2.064183  | 1.222095  |           |           |        |        |
| H  | -1.275777 | 2.711500  | 1.247799  |           |           |        |        |
| H  | 0.093332  | 3.820541  | 1.261082  |           |           |        |        |
| H  | -1.376197 | 2.788593  | -1.059624 |           |           |        |        |



H -0.012592 3.903186 -1.115920

Population analysis using the SCF density.

| Label | Frequencies | IR Inten | Raman Activ | Depolar (P) | Depolar (U) | Dipole  |
|-------|-------------|----------|-------------|-------------|-------------|---------|
| A     | 3229.7390   | 11.1358  | 229.1641    | 0.2456      | 0.3943      | 12.3995 |
| A     | 3164.8346   | 12.4272  | 264.3211    | 0.4249      | 0.5964      |         |
| A     | 3125.0698   | 155.8001 | 310.7376    | 0.5790      | 0.7334      |         |
| A     | 3121.7543   | 21.7296  | 282.8571    | 0.4176      | 0.5892      |         |
| A     | 3110.1661   | 16.2882  | 225.0524    | 0.6885      | 0.8155      |         |
| A     | 3107.0636   | 5.4953   | 378.6953    | 0.3845      | 0.5554      |         |
| A     | 3100.5817   | 64.2665  | 18.4703     | 0.5591      | 0.7172      |         |
| A     | 3072.7621   | 95.4802  | 568.9652    | 0.0779      | 0.1445      |         |
| A     | 3067.7452   | 13.8974  | 162.6601    | 0.1838      | 0.3106      |         |
| A     | 3060.0692   | 42.0312  | 100.4706    | 0.7471      | 0.8552      |         |
| A     | 3042.5344   | 42.0948  | 541.7334    | 0.1325      | 0.2340      |         |
| A     | 3028.2533   | 123.8859 | 740.4934    | 0.2014      | 0.3353      |         |
| A     | 3022.9567   | 83.5035  | 371.8303    | 0.2597      | 0.4124      |         |
| A     | 2525.9566   | 9.5778   | 318.8310    | 0.7239      | 0.8398      |         |
| A     | 2523.8031   | 9.0288   | 313.4281    | 0.7446      | 0.8536      |         |
| A     | 2508.2253   | 67.0407  | 1114.3703   | 0.0429      | 0.0823      |         |
| A     | 1816.0635   | 734.1915 | 43.4530     | 0.3511      | 0.5197      |         |
| A     | 1744.6651   | 95.8023  | 202.6637    | 0.1750      | 0.2978      |         |
| A     | 1494.7937   | 1.7864   | 14.1020     | 0.4933      | 0.6607      |         |
| A     | 1476.3874   | 9.7118   | 20.9510     | 0.7494      | 0.8568      |         |
| A     | 1475.4968   | 9.7063   | 16.7821     | 0.7430      | 0.8525      |         |
| A     | 1465.4432   | 0.8371   | 27.5549     | 0.7310      | 0.8446      |         |
| A     | 1465.2532   | 7.4533   | 50.1305     | 0.5815      | 0.7354      |         |
| A     | 1440.3889   | 25.4848  | 16.5851     | 0.7350      | 0.8473      |         |
| A     | 1377.4504   | 115.2440 | 4.8627      | 0.6981      | 0.8222      |         |
| A     | 1346.7932   | 15.5280  | 21.0132     | 0.2213      | 0.3625      |         |
| A     | 1341.3096   | 7.4884   | 28.2418     | 0.0583      | 0.1102      |         |
| A     | 1332.6450   | 0.1937   | 1.0082      | 0.6367      | 0.7781      |         |
| A     | 1319.2774   | 5.6613   | 30.5335     | 0.4537      | 0.6242      |         |
| A     | 1313.7207   | 80.2364  | 50.5987     | 0.6179      | 0.7638      |         |
| A     | 1298.8394   | 1.1614   | 3.3524      | 0.7218      | 0.8384      |         |
| A     | 1256.1715   | 60.0116  | 28.5667     | 0.1479      | 0.2576      |         |
| A     | 1249.4423   | 6.1183   | 15.7855     | 0.7499      | 0.8571      |         |
| A     | 1247.4347   | 156.9080 | 10.8027     | 0.7459      | 0.8545      |         |
| A     | 1227.4108   | 141.7172 | 29.5801     | 0.3465      | 0.5147      |         |
| A     | 1204.9815   | 18.7998  | 108.2807    | 0.3842      | 0.5551      |         |
| A     | 1202.8202   | 1.9777   | 4.0304      | 0.6985      | 0.8225      |         |
| A     | 1171.9587   | 54.4743  | 5.8015      | 0.5806      | 0.7346      |         |
| A     | 1161.9453   | 260.5064 | 30.6011     | 0.7499      | 0.8571      |         |
| A     | 1122.0742   | 8.9429   | 46.9676     | 0.7499      | 0.8571      |         |
| A     | 1120.9006   | 6.9927   | 40.7483     | 0.7491      | 0.8566      |         |
| A     | 1104.8080   | 0.1514   | 11.4394     | 0.7487      | 0.8563      |         |
| A     | 1070.0468   | 76.5477  | 16.0882     | 0.5444      | 0.7050      |         |

|   |           |          |          |        |        |
|---|-----------|----------|----------|--------|--------|
| A | 1067.5268 | 185.4327 | 14.4594  | 0.7081 | 0.8291 |
| A | 1045.7675 | 8.8690   | 7.2372   | 0.4866 | 0.6547 |
| A | 1044.6026 | 0.0583   | 0.8827   | 0.7275 | 0.8422 |
| A | 995.4697  | 12.1005  | 14.2564  | 0.2280 | 0.3714 |
| A | 989.8740  | 327.8710 | 35.8546  | 0.7484 | 0.8561 |
| A | 984.9460  | 9.7878   | 100.0686 | 0.6036 | 0.7528 |
| A | 973.5719  | 3.4561   | 2.3404   | 0.7500 | 0.8571 |
| A | 955.3835  | 27.1769  | 4.6998   | 0.3332 | 0.4999 |
| A | 949.1170  | 26.0788  | 23.4538  | 0.5847 | 0.7379 |
| A | 916.1632  | 5.4636   | 67.1669  | 0.1736 | 0.2959 |
| A | 904.4179  | 1.5639   | 22.9134  | 0.5552 | 0.7140 |
| A | 835.6259  | 3.1164   | 2.9079   | 0.7269 | 0.8419 |
| A | 811.7326  | 17.2818  | 5.2455   | 0.6496 | 0.7876 |
| A | 803.9671  | 1.9805   | 22.6938  | 0.1022 | 0.1854 |
| A | 769.9216  | 22.4623  | 7.9164   | 0.7456 | 0.8543 |
| A | 742.7045  | 22.1223  | 26.2686  | 0.4097 | 0.5812 |
| A | 668.6282  | 2.7203   | 3.4268   | 0.4064 | 0.5780 |
| A | 657.5464  | 7.9462   | 17.1318  | 0.1185 | 0.2119 |
| A | 624.2334  | 0.2023   | 1.5100   | 0.7099 | 0.8303 |
| A | 587.5387  | 18.8492  | 22.9692  | 0.1382 | 0.2428 |
| A | 535.3864  | 8.7962   | 9.8070   | 0.3661 | 0.5360 |
| A | 495.7701  | 4.9353   | 6.1090   | 0.1826 | 0.3087 |
| A | 473.3871  | 6.3480   | 20.5740  | 0.4812 | 0.6497 |
| A | 463.5627  | 0.0605   | 0.8915   | 0.6855 | 0.8134 |
| A | 455.6559  | 0.4445   | 0.9833   | 0.7463 | 0.8547 |
| A | 343.7929  | 2.1957   | 7.7347   | 0.2584 | 0.4107 |
| A | 317.1559  | 1.7854   | 3.3727   | 0.4718 | 0.6411 |
| A | 286.9513  | 0.1524   | 16.7223  | 0.1312 | 0.2319 |
| A | 277.1883  | 1.8398   | 4.4379   | 0.2302 | 0.3742 |
| A | 214.3854  | 1.9746   | 1.5675   | 0.7487 | 0.8563 |
| A | 201.7555  | 6.4301   | 3.4871   | 0.3423 | 0.5100 |
| A | 189.7812  | 3.3652   | 2.8471   | 0.2276 | 0.3708 |
| A | 132.9010  | 4.4921   | 1.1449   | 0.6742 | 0.8054 |
| A | 119.0047  | 0.1172   | 0.8139   | 0.6775 | 0.8077 |
| A | 114.4930  | 0.1361   | 0.1125   | 0.4867 | 0.6548 |
| A | 97.8550   | 2.7608   | 0.3496   | 0.7303 | 0.8442 |
| A | 90.0375   | 0.1509   | 1.4261   | 0.7472 | 0.8553 |
| A | 76.0844   | 0.0185   | 0.0177   | 0.7473 | 0.8554 |
| A | 63.5626   | 7.9720   | 0.6080   | 0.7087 | 0.8295 |
| A | 48.5258   | 3.2604   | 1.2691   | 0.7499 | 0.8571 |
| A | 25.1802   | 2.8903   | 1.2608   | 0.7491 | 0.8565 |

7-endo-trig prod for 4,5-Au-PH3 complex of 6,6-cyclopentano-hexa-4,5-dienoic acid carboxylate:

Processing aupcphexdienoat7prod6psdm6.log  
PG=C01

Method BasisSet Imaginary Freqs  
 RM06 GenECP 0

HF Energy  
 -1017.8777704

| ZPE       | E298    | S298    | Squasihar | Equasihar | Strans | Srot   |
|-----------|---------|---------|-----------|-----------|--------|--------|
| 150.79509 | 160.806 | 133.057 | 125.989   | 160.846   | 43.821 | 33.372 |

30

|    |           |           |           |
|----|-----------|-----------|-----------|
| C  | -1.427044 | 0.500170  | -0.107438 |
| C  | -0.450806 | -0.649500 | -0.115282 |
| C  | -0.780695 | -1.953190 | -0.148049 |
| C  | -2.144569 | -2.585996 | -0.095949 |
| C  | -3.186420 | -1.782064 | 0.675400  |
| C  | -3.671325 | -0.594299 | -0.110176 |
| O  | -2.744267 | 0.200616  | -0.673108 |
| Au | 1.570956  | -0.193880 | -0.022128 |
| P  | 3.909134  | 0.251142  | 0.097733  |
| O  | -4.841248 | -0.382954 | -0.333546 |
| C  | -1.625900 | 1.184451  | 1.251570  |
| C  | -1.001076 | 1.690976  | -0.974354 |
| H  | 0.033977  | -2.679288 | -0.192836 |
| H  | 4.696229  | 0.080732  | -1.060243 |
| H  | 4.698588  | -0.488912 | 1.002491  |
| H  | 4.334529  | 1.547590  | 0.455114  |
| H  | -2.515551 | -2.794579 | -1.112281 |
| H  | -2.044090 | -3.568919 | 0.383316  |
| H  | -4.071740 | -2.384425 | 0.900868  |
| H  | -2.755657 | -1.456520 | 1.632087  |
| H  | -0.628342 | 1.343541  | 1.684961  |
| C  | -2.311743 | 2.516657  | 0.924221  |
| H  | -2.183993 | 0.567505  | 1.966087  |
| H  | 0.053623  | 1.910814  | -0.757990 |
| H  | -1.077798 | 1.444672  | -2.039838 |
| C  | -1.900995 | 2.848950  | -0.529611 |
| H  | -1.381587 | 3.811123  | -0.606708 |
| H  | -2.788000 | 2.909177  | -1.168857 |
| H  | -3.400791 | 2.407728  | 0.993361  |
| H  | -2.024355 | 3.300911  | 1.633826  |

Population analysis using the SCF density.

| Label | Frequencies | IR Inten | Raman Activ | Depolar (P) | Depolar (U) | Dipole |
|-------|-------------|----------|-------------|-------------|-------------|--------|
| A     | 3124.1368   | 14.9347  | 85.3265     | 0.2460      | 0.3949      | 9.8835 |
| A     | 3122.4175   | 7.0117   | 104.1287    | 0.5042      | 0.6704      |        |
| A     | 3119.9656   | 50.0850  | 58.5187     | 0.6860      | 0.8137      |        |
| A     | 3106.5327   | 17.5594  | 76.0492     | 0.6812      | 0.8104      |        |

|   |           |          |          |        |        |
|---|-----------|----------|----------|--------|--------|
| A | 3102.1198 | 6.3990   | 94.0993  | 0.5565 | 0.7151 |
| A | 3093.5859 | 18.4087  | 32.9075  | 0.1873 | 0.3155 |
| A | 3065.2155 | 21.9098  | 113.9376 | 0.4076 | 0.5791 |
| A | 3060.8155 | 57.4968  | 240.3306 | 0.0472 | 0.0902 |
| A | 3050.7374 | 31.3951  | 65.0381  | 0.4624 | 0.6324 |
| A | 3049.5458 | 8.7972   | 85.0529  | 0.2130 | 0.3512 |
| A | 3040.5621 | 47.6854  | 94.7913  | 0.1360 | 0.2395 |
| A | 3034.4984 | 14.0145  | 16.7258  | 0.2536 | 0.4047 |
| A | 3008.9595 | 38.5336  | 248.9555 | 0.1422 | 0.2490 |
| A | 2502.3529 | 16.2025  | 136.3247 | 0.7389 | 0.8499 |
| A | 2499.8708 | 17.7022  | 151.7575 | 0.6810 | 0.8102 |
| A | 2487.3110 | 105.1923 | 657.1040 | 0.0942 | 0.1721 |
| A | 1841.8713 | 480.3273 | 11.6260  | 0.4564 | 0.6267 |
| A | 1685.0393 | 1.3253   | 45.5251  | 0.1420 | 0.2486 |
| A | 1486.6843 | 7.0443   | 2.6643   | 0.6076 | 0.7559 |
| A | 1461.7106 | 6.2652   | 7.3790   | 0.7268 | 0.8418 |
| A | 1454.4266 | 8.1436   | 12.0334  | 0.6362 | 0.7777 |
| A | 1450.9599 | 16.5936  | 16.4742  | 0.5875 | 0.7401 |
| A | 1442.7723 | 29.3053  | 3.4090   | 0.7172 | 0.8353 |
| A | 1436.8081 | 0.3557   | 6.6910   | 0.7500 | 0.8571 |
| A | 1373.2175 | 131.8459 | 8.7956   | 0.2369 | 0.3830 |
| A | 1365.7615 | 13.1149  | 19.7681  | 0.1444 | 0.2524 |
| A | 1343.2451 | 2.1272   | 1.4170   | 0.7289 | 0.8432 |
| A | 1339.5830 | 39.5402  | 6.3701   | 0.4163 | 0.5879 |
| A | 1323.3039 | 0.7095   | 0.4209   | 0.7432 | 0.8527 |
| A | 1313.6110 | 17.0489  | 11.6643  | 0.5090 | 0.6746 |
| A | 1296.2453 | 55.5051  | 2.9151   | 0.6181 | 0.7640 |
| A | 1291.2835 | 11.3857  | 2.5603   | 0.7068 | 0.8282 |
| A | 1242.0101 | 1.1899   | 3.8606   | 0.7100 | 0.8304 |
| A | 1233.8550 | 19.8103  | 14.7932  | 0.4950 | 0.6622 |
| A | 1225.1974 | 64.1255  | 2.9606   | 0.7389 | 0.8499 |
| A | 1208.5846 | 47.8002  | 7.3103   | 0.5716 | 0.7274 |
| A | 1202.9873 | 51.8938  | 5.0472   | 0.7469 | 0.8551 |
| A | 1161.9648 | 5.0833   | 1.5650   | 0.4083 | 0.5798 |
| A | 1146.5973 | 22.6698  | 3.5292   | 0.7439 | 0.8531 |
| A | 1134.7560 | 4.0670   | 17.1810  | 0.7343 | 0.8468 |
| A | 1131.4396 | 4.5157   | 17.5101  | 0.7462 | 0.8547 |
| A | 1119.3421 | 0.6205   | 2.4827   | 0.1057 | 0.1912 |
| A | 1072.7815 | 8.6509   | 4.8209   | 0.7491 | 0.8565 |
| A | 1060.7380 | 45.5705  | 8.0350   | 0.5656 | 0.7225 |
| A | 1037.8904 | 28.8291  | 8.7757   | 0.3569 | 0.5260 |
| A | 1025.0476 | 1.7079   | 2.7796   | 0.7307 | 0.8444 |
| A | 1022.9656 | 218.6534 | 20.1164  | 0.7037 | 0.8261 |
| A | 1014.8990 | 4.8926   | 16.8447  | 0.6959 | 0.8207 |
| A | 991.4118  | 28.0257  | 8.6002   | 0.5893 | 0.7416 |
| A | 969.3436  | 6.9849   | 0.9802   | 0.6953 | 0.8203 |
| A | 946.3867  | 7.9556   | 9.1330   | 0.1297 | 0.2296 |

|   |          |         |         |        |        |
|---|----------|---------|---------|--------|--------|
| A | 907.0550 | 2.5550  | 5.2153  | 0.0409 | 0.0786 |
| A | 893.9002 | 1.4225  | 5.9175  | 0.3043 | 0.4666 |
| A | 880.0929 | 8.7117  | 5.6054  | 0.7492 | 0.8566 |
| A | 834.2936 | 8.2760  | 9.2772  | 0.1331 | 0.2349 |
| A | 821.1564 | 11.9305 | 5.6360  | 0.2877 | 0.4468 |
| A | 797.7451 | 2.3170  | 0.8455  | 0.6744 | 0.8055 |
| A | 770.2838 | 5.1657  | 5.6100  | 0.1191 | 0.2128 |
| A | 714.9711 | 10.4202 | 0.8326  | 0.4870 | 0.6550 |
| A | 689.2778 | 4.4920  | 16.9297 | 0.0448 | 0.0858 |
| A | 647.1776 | 0.0679  | 1.0632  | 0.1275 | 0.2261 |
| A | 593.5774 | 0.9141  | 0.8365  | 0.1917 | 0.3217 |
| A | 564.3727 | 7.1616  | 3.3969  | 0.3726 | 0.5429 |
| A | 551.7463 | 2.7456  | 0.4662  | 0.2953 | 0.4559 |
| A | 496.8896 | 2.9360  | 3.3271  | 0.1972 | 0.3294 |
| A | 438.9898 | 0.3958  | 0.7702  | 0.4074 | 0.5790 |
| A | 430.5871 | 0.4602  | 0.5562  | 0.6999 | 0.8235 |
| A | 394.2411 | 0.4531  | 1.0338  | 0.6976 | 0.8219 |
| A | 386.9226 | 2.8481  | 4.4166  | 0.1319 | 0.2331 |
| A | 341.3813 | 1.4740  | 3.1024  | 0.3144 | 0.4784 |
| A | 305.7506 | 7.8169  | 1.1081  | 0.6134 | 0.7603 |
| A | 257.3249 | 0.6491  | 5.3816  | 0.2226 | 0.3642 |
| A | 251.3812 | 2.2366  | 5.6933  | 0.1194 | 0.2133 |
| A | 201.8376 | 3.3155  | 0.9983  | 0.5043 | 0.6705 |
| A | 178.6534 | 0.9156  | 1.3052  | 0.6650 | 0.7988 |
| A | 165.3074 | 3.6872  | 2.3767  | 0.2661 | 0.4203 |
| A | 149.0240 | 1.2453  | 0.4064  | 0.7013 | 0.8244 |
| A | 118.8761 | 0.2598  | 0.3762  | 0.7008 | 0.8241 |
| A | 116.9791 | 1.0195  | 0.1762  | 0.7415 | 0.8516 |
| A | 78.5606  | 1.3604  | 0.5484  | 0.7217 | 0.8384 |
| A | 56.1590  | 5.2357  | 1.8426  | 0.7469 | 0.8551 |
| A | 55.1421  | 3.2912  | 1.0056  | 0.7498 | 0.8570 |
| A | 43.7772  | 0.1877  | 0.2188  | 0.7460 | 0.8545 |
| A | 25.9165  | 0.8762  | 0.2769  | 0.7088 | 0.8296 |

Processing aupcphexdienoat7prod6psd1pbedcms.log  
PG=C01

Method BasisSet Imaginary Freqs  
RPBE1PBE GenECP 0

HF Energy  
-1017.5128926

| ZPE       | E298    | S298    | Squasihar | Equasihar | Strans | Srot   |
|-----------|---------|---------|-----------|-----------|--------|--------|
| 152.12998 | 162.035 | 131.744 | 125.691   | 162.073   | 43.821 | 33.372 |

30

|    |           |           |           |
|----|-----------|-----------|-----------|
| C  | -1.413689 | 0.521183  | -0.073400 |
| C  | -0.455198 | -0.650610 | -0.081392 |
| C  | -0.811221 | -1.952542 | -0.075904 |
| C  | -2.174574 | -2.582374 | 0.028836  |
| C  | -3.233725 | -1.717406 | 0.709849  |
| C  | -3.667097 | -0.588484 | -0.178254 |
| O  | -2.748397 | 0.260263  | -0.644313 |
| Au | 1.561399  | -0.212068 | -0.027985 |
| P  | 3.848783  | 0.223055  | 0.051630  |
| O  | -4.815295 | -0.458015 | -0.567537 |
| C  | -1.586487 | 1.217695  | 1.287411  |
| C  | -0.955542 | 1.698940  | -0.949382 |
| H  | -0.007172 | -2.688465 | -0.122106 |
| H  | 4.607530  | -0.044030 | -1.104374 |
| H  | 4.616202  | -0.460104 | 1.014673  |
| H  | 4.249425  | 1.548115  | 0.310079  |
| H  | -2.534174 | -2.899782 | -0.961800 |
| H  | -2.071958 | -3.507387 | 0.609289  |
| H  | -4.127127 | -2.303648 | 0.936523  |
| H  | -2.835534 | -1.329947 | 1.653954  |
| H  | -0.585494 | 1.310013  | 1.724474  |
| C  | -2.177267 | 2.602494  | 0.971801  |
| H  | -2.190384 | 0.637380  | 1.990567  |
| H  | 0.102623  | 1.880062  | -0.729798 |
| H  | -1.039705 | 1.460079  | -2.014605 |
| C  | -1.812777 | 2.889997  | -0.505228 |
| H  | -1.272135 | 3.834767  | -0.623648 |
| H  | -2.718678 | 2.959040  | -1.115140 |
| H  | -3.263862 | 2.598446  | 1.105543  |
| H  | -1.776841 | 3.361683  | 1.651525  |

WARNING: Geometry optimization converged in opt job, but not in freq job

Population analysis using the SCF density.

| Label | Frequencies | IR Inten | Raman Activ | Depolar (P) | Depolar (U) | Dipole  |
|-------|-------------|----------|-------------|-------------|-------------|---------|
| A     | 3164.0236   | 8.8809   | 187.6035    | 0.5663      | 0.7231      | 12.9691 |
| A     | 3154.6102   | 22.2109  | 244.1820    | 0.2613      | 0.4143      |         |
| A     | 3151.1122   | 92.0536  | 165.7836    | 0.5162      | 0.6809      |         |
| A     | 3144.2840   | 46.5307  | 186.8477    | 0.6951      | 0.8201      |         |
| A     | 3134.3938   | 9.4805   | 355.7550    | 0.5922      | 0.7439      |         |
| A     | 3121.2804   | 11.0886  | 66.0119     | 0.6036      | 0.7528      |         |
| A     | 3101.6998   | 19.4459  | 324.8088    | 0.0547      | 0.1038      |         |
| A     | 3094.4032   | 53.7664  | 830.8871    | 0.0334      | 0.0647      |         |
| A     | 3088.8909   | 4.9988   | 252.6599    | 0.7422      | 0.8520      |         |
| A     | 3084.8713   | 66.5087  | 67.0262     | 0.3222      | 0.4874      |         |
| A     | 3080.5204   | 52.3492  | 104.0722    | 0.7074      | 0.8286      |         |
| A     | 3074.3052   | 29.8569  | 191.4169    | 0.1548      | 0.2680      |         |

|   |           |          |           |        |        |
|---|-----------|----------|-----------|--------|--------|
| A | 3038.1529 | 48.8915  | 616.4613  | 0.1502 | 0.2612 |
| A | 2531.5915 | 8.0805   | 325.4703  | 0.7461 | 0.8546 |
| A | 2529.9121 | 8.7670   | 331.6343  | 0.7297 | 0.8437 |
| A | 2514.7632 | 60.5275  | 1114.8669 | 0.0435 | 0.0833 |
| A | 1782.0825 | 747.7980 | 30.3563   | 0.3240 | 0.4894 |
| A | 1681.1213 | 4.6730   | 177.7982  | 0.1282 | 0.2273 |
| A | 1495.8273 | 5.4717   | 6.8066    | 0.7204 | 0.8374 |
| A | 1476.5574 | 25.5539  | 14.6850   | 0.7255 | 0.8409 |
| A | 1473.4147 | 8.8121   | 26.2593   | 0.7477 | 0.8557 |
| A | 1463.3661 | 58.1619  | 38.5272   | 0.5028 | 0.6691 |
| A | 1460.1482 | 10.3826  | 19.0174   | 0.6578 | 0.7936 |
| A | 1456.9762 | 0.9107   | 27.4713   | 0.7309 | 0.8446 |
| A | 1391.1771 | 270.7288 | 13.9301   | 0.3077 | 0.4706 |
| A | 1375.6837 | 19.8582  | 55.7444   | 0.1634 | 0.2809 |
| A | 1357.3533 | 5.0754   | 3.2147    | 0.5729 | 0.7285 |
| A | 1353.8195 | 68.9837  | 28.3045   | 0.5552 | 0.7140 |
| A | 1334.7636 | 1.8658   | 0.8959    | 0.3285 | 0.4945 |
| A | 1327.5189 | 39.7774  | 13.5040   | 0.3519 | 0.5206 |
| A | 1310.1345 | 37.4803  | 15.4675   | 0.7496 | 0.8569 |
| A | 1303.0745 | 30.7964  | 7.4028    | 0.7430 | 0.8526 |
| A | 1255.3910 | 8.2002   | 13.3461   | 0.6021 | 0.7516 |
| A | 1239.9742 | 14.9420  | 21.5763   | 0.5680 | 0.7245 |
| A | 1237.7425 | 123.7578 | 9.9062    | 0.6920 | 0.8179 |
| A | 1219.9877 | 5.4466   | 14.1020   | 0.7214 | 0.8381 |
| A | 1203.2509 | 121.5338 | 14.1743   | 0.5706 | 0.7266 |
| A | 1170.4613 | 34.7108  | 5.8931    | 0.4959 | 0.6630 |
| A | 1155.3235 | 37.5040  | 8.6980    | 0.6811 | 0.8103 |
| A | 1123.9475 | 3.8037   | 14.8642   | 0.6701 | 0.8025 |
| A | 1121.0791 | 9.0840   | 39.8446   | 0.7289 | 0.8432 |
| A | 1119.4458 | 7.3820   | 34.3301   | 0.7255 | 0.8409 |
| A | 1079.7989 | 15.3058  | 10.6090   | 0.7486 | 0.8562 |
| A | 1060.2822 | 63.5142  | 18.6559   | 0.5837 | 0.7372 |
| A | 1041.4451 | 38.4093  | 13.3228   | 0.3953 | 0.5666 |
| A | 1034.8445 | 12.0587  | 8.2544    | 0.7205 | 0.8375 |
| A | 1016.4909 | 73.0663  | 30.1327   | 0.7288 | 0.8431 |
| A | 999.5936  | 0.9590   | 2.5946    | 0.3805 | 0.5512 |
| A | 990.4393  | 270.5839 | 77.9649   | 0.7169 | 0.8351 |
| A | 976.6510  | 14.4004  | 3.6133    | 0.6571 | 0.7931 |
| A | 953.2580  | 15.9682  | 10.7992   | 0.1269 | 0.2253 |
| A | 914.8630  | 4.2526   | 15.7312   | 0.0259 | 0.0504 |
| A | 896.9063  | 4.3911   | 11.2117   | 0.4288 | 0.6002 |
| A | 889.8000  | 19.6631  | 10.5154   | 0.7497 | 0.8570 |
| A | 840.8047  | 10.6016  | 12.9117   | 0.2479 | 0.3973 |
| A | 834.1605  | 18.1872  | 9.4466    | 0.1556 | 0.2693 |
| A | 803.3252  | 4.9376   | 1.4925    | 0.6859 | 0.8137 |
| A | 772.3934  | 20.4193  | 9.4886    | 0.1676 | 0.2871 |
| A | 735.6123  | 17.7010  | 0.9620    | 0.7322 | 0.8454 |

|   |          |         |         |        |        |
|---|----------|---------|---------|--------|--------|
| A | 694.8695 | 10.0000 | 27.8813 | 0.0253 | 0.0493 |
| A | 651.0525 | 0.5432  | 4.4846  | 0.0798 | 0.1477 |
| A | 605.6313 | 3.8665  | 2.1772  | 0.4580 | 0.6282 |
| A | 561.4640 | 9.3337  | 3.1692  | 0.7485 | 0.8562 |
| A | 557.1612 | 14.6428 | 11.6384 | 0.2398 | 0.3868 |
| A | 503.0993 | 6.8344  | 4.9710  | 0.2590 | 0.4114 |
| A | 469.9654 | 0.2400  | 0.5313  | 0.4841 | 0.6524 |
| A | 467.8307 | 0.4065  | 1.3162  | 0.6150 | 0.7616 |
| A | 392.1626 | 4.8513  | 6.9566  | 0.2119 | 0.3497 |
| A | 377.9848 | 1.6769  | 3.1954  | 0.4597 | 0.6298 |
| A | 342.4022 | 2.8273  | 5.3769  | 0.2245 | 0.3667 |
| A | 305.5752 | 13.4923 | 3.0032  | 0.7131 | 0.8325 |
| A | 295.6254 | 0.1281  | 14.0288 | 0.0969 | 0.1767 |
| A | 256.0754 | 5.9908  | 3.4668  | 0.2588 | 0.4112 |
| A | 198.6820 | 7.9796  | 2.0566  | 0.6996 | 0.8233 |
| A | 175.7141 | 1.9030  | 2.3804  | 0.5038 | 0.6701 |
| A | 166.1208 | 3.9340  | 1.1875  | 0.5443 | 0.7049 |
| A | 152.0655 | 3.2064  | 0.7276  | 0.7291 | 0.8433 |
| A | 121.7950 | 1.2415  | 2.0254  | 0.7305 | 0.8442 |
| A | 99.4709  | 1.1169  | 0.8534  | 0.7488 | 0.8564 |
| A | 75.6802  | 1.1257  | 0.8139  | 0.7454 | 0.8541 |
| A | 63.7924  | 4.2588  | 0.5300  | 0.7421 | 0.8520 |
| A | 61.4680  | 6.9789  | 0.9662  | 0.7370 | 0.8486 |
| A | 51.2012  | 3.9838  | 0.8019  | 0.6938 | 0.8192 |
| A | 30.4717  | 1.3385  | 0.5240  | 0.7499 | 0.8571 |

SM<sup>+</sup> 4,5-Au-PH<sub>3</sub> complex of 6,6-cyclopentano-hexa-4,5-dienoic acid:

Processing aupcphexdienic5sm6psdm6.log  
PG=C01

| Method | BasisSet | Imaginary Freqs |
|--------|----------|-----------------|
| RM06   | GenECP   | 0               |

HF Energy  
-1018.2642755

| ZPE       | E298    | S298    | Squasihar | Equasihar | Strans | Srot   |
|-----------|---------|---------|-----------|-----------|--------|--------|
| 156.77835 | 167.965 | 145.975 | 134.713   | 168.027   | 43.828 | 33.959 |

31

|   |           |          |           |
|---|-----------|----------|-----------|
| C | 0.830496  | 3.954221 | 0.598064  |
| C | -0.024028 | 2.732544 | 0.245841  |
| C | 0.994565  | 1.676879 | -0.136622 |
| C | 2.354022  | 2.336298 | -0.305648 |
| C | 2.022428  | 3.829379 | -0.346326 |
| C | 0.786916  | 0.398544 | -0.315893 |



|    |           |           |           |
|----|-----------|-----------|-----------|
| C  | 0.743283  | -0.944520 | -0.488019 |
| C  | 1.221450  | -1.942546 | 0.550270  |
| C  | 2.555877  | -2.564232 | 0.152404  |
| C  | 3.698343  | -1.586822 | 0.168199  |
| O  | 4.845812  | -2.179769 | -0.174286 |
| Au | -1.431280 | -0.416049 | -0.105640 |
| P  | -3.763397 | -0.392183 | 0.226895  |
| O  | 3.611916  | -0.412591 | 0.452229  |
| H  | -4.355004 | 0.868713  | 0.407513  |
| H  | -4.543929 | -0.926707 | -0.810885 |
| H  | -4.246420 | -1.095914 | 1.341848  |
| H  | 0.655528  | -1.325200 | -1.515156 |
| H  | 1.309725  | -1.442153 | 1.521728  |
| H  | 0.488855  | -2.752578 | 0.656842  |
| H  | 2.811733  | -3.387774 | 0.831140  |
| H  | 2.511362  | -3.020831 | -0.846506 |
| H  | 5.555506  | -1.518025 | -0.137334 |
| H  | 2.957095  | 2.086216  | 0.577924  |
| H  | 2.901160  | 1.958356  | -1.174266 |
| H  | -0.649118 | 2.948121  | -0.633931 |
| H  | -0.689930 | 2.400906  | 1.052597  |
| H  | 2.874274  | 4.451082  | -0.054393 |
| H  | 1.730376  | 4.126920  | -1.362997 |
| H  | 0.280203  | 4.893782  | 0.490036  |
| H  | 1.168673  | 3.886125  | 1.640843  |

WARNING: Geometry optimization converged in opt job, but not in freq job

Population analysis using the SCF density.

| Label | Frequencies | IR Inten | Raman Activ | Depolar (P) | Depolar (U) | Dipole |
|-------|-------------|----------|-------------|-------------|-------------|--------|
| A     | 3801.9472   | 136.4707 | 113.3190    | 0.2318      | 0.3763      | 4.9726 |
| A     | 3127.6569   | 7.2500   | 89.2554     | 0.7243      | 0.8401      |        |
| A     | 3123.8707   | 17.0912  | 89.3955     | 0.7473      | 0.8554      |        |
| A     | 3120.1411   | 11.2155  | 247.1431    | 0.2367      | 0.3829      |        |
| A     | 3115.6280   | 3.1370   | 23.1400     | 0.7091      | 0.8298      |        |
| A     | 3099.8296   | 0.2391   | 120.5682    | 0.4971      | 0.6641      |        |
| A     | 3085.0571   | 15.2721  | 43.2354     | 0.3716      | 0.5419      |        |
| A     | 3067.6800   | 0.4907   | 89.8210     | 0.3725      | 0.5428      |        |
| A     | 3053.2860   | 7.3993   | 58.8094     | 0.2167      | 0.3562      |        |
| A     | 3049.7419   | 21.4676  | 36.6535     | 0.7056      | 0.8274      |        |
| A     | 3049.2787   | 8.4805   | 81.9707     | 0.0710      | 0.1326      |        |
| A     | 3048.0763   | 5.0648   | 166.5944    | 0.0699      | 0.1307      |        |
| A     | 3041.5248   | 18.7624  | 252.0459    | 0.0567      | 0.1073      |        |
| A     | 3023.9294   | 11.9116  | 97.9914     | 0.0474      | 0.0905      |        |
| A     | 2540.1218   | 0.5955   | 133.8807    | 0.7206      | 0.8376      |        |
| A     | 2536.4510   | 0.4962   | 116.8659    | 0.6938      | 0.8192      |        |
| A     | 2514.7563   | 10.2520  | 411.4575    | 0.0500      | 0.0952      |        |

|   |           |          |         |        |        |
|---|-----------|----------|---------|--------|--------|
| A | 1962.6761 | 62.4779  | 53.6170 | 0.4893 | 0.6571 |
| A | 1854.9436 | 332.8690 | 8.3179  | 0.0612 | 0.1153 |
| A | 1475.5881 | 1.5394   | 1.1575  | 0.5960 | 0.7468 |
| A | 1461.1028 | 10.1971  | 12.6669 | 0.7500 | 0.8571 |
| A | 1447.8240 | 65.1373  | 2.7299  | 0.7406 | 0.8510 |
| A | 1442.4380 | 61.6898  | 6.2941  | 0.5711 | 0.7270 |
| A | 1433.8522 | 6.3015   | 6.6272  | 0.7427 | 0.8524 |
| A | 1427.3498 | 29.4731  | 9.3799  | 0.7120 | 0.8318 |
| A | 1423.5960 | 39.3847  | 5.0103  | 0.2325 | 0.3773 |
| A | 1414.2377 | 14.3787  | 15.7631 | 0.5983 | 0.7487 |
| A | 1341.4472 | 2.1916   | 1.4087  | 0.6987 | 0.8226 |
| A | 1334.6096 | 4.2697   | 5.9909  | 0.7472 | 0.8553 |
| A | 1318.8988 | 0.0898   | 1.2561  | 0.7309 | 0.8445 |
| A | 1312.6435 | 18.4818  | 7.5569  | 0.5697 | 0.7259 |
| A | 1305.8846 | 14.8763  | 5.3627  | 0.6280 | 0.7715 |
| A | 1282.2034 | 0.8561   | 3.8614  | 0.5106 | 0.6760 |
| A | 1244.7653 | 5.8765   | 9.2027  | 0.5670 | 0.7237 |
| A | 1243.1341 | 14.3679  | 9.3569  | 0.6449 | 0.7841 |
| A | 1223.9712 | 15.8527  | 16.4593 | 0.1717 | 0.2930 |
| A | 1221.1269 | 3.9091   | 6.8878  | 0.5961 | 0.7469 |
| A | 1193.0186 | 97.7035  | 5.8024  | 0.1126 | 0.2025 |
| A | 1174.1117 | 185.4231 | 0.7440  | 0.5744 | 0.7297 |
| A | 1147.2556 | 6.4495   | 1.1242  | 0.3773 | 0.5478 |
| A | 1140.0105 | 4.5093   | 0.8583  | 0.7497 | 0.8570 |
| A | 1135.0013 | 3.2596   | 5.0752  | 0.6243 | 0.7687 |
| A | 1120.5966 | 2.5159   | 15.5724 | 0.7497 | 0.8569 |
| A | 1117.2817 | 3.3616   | 14.9166 | 0.7498 | 0.8570 |
| A | 1063.5142 | 10.3413  | 10.7264 | 0.2785 | 0.4357 |
| A | 1055.3628 | 0.6829   | 4.6242  | 0.7487 | 0.8563 |
| A | 1035.8038 | 2.0863   | 6.4213  | 0.7184 | 0.8362 |
| A | 1019.6996 | 2.9437   | 3.6616  | 0.4124 | 0.5840 |
| A | 991.9763  | 174.6613 | 16.1025 | 0.6359 | 0.7775 |
| A | 962.3717  | 5.4484   | 3.7012  | 0.6735 | 0.8049 |
| A | 956.5478  | 14.2115  | 7.7041  | 0.2438 | 0.3920 |
| A | 923.6643  | 0.7965   | 8.8941  | 0.0780 | 0.1447 |
| A | 900.7400  | 1.4037   | 1.4704  | 0.4425 | 0.6135 |
| A | 890.1318  | 19.0642  | 3.1808  | 0.7283 | 0.8428 |
| A | 876.1721  | 18.8649  | 7.4792  | 0.2744 | 0.4307 |
| A | 867.8618  | 1.0604   | 0.8612  | 0.6895 | 0.8162 |
| A | 837.9940  | 5.5614   | 8.3242  | 0.2285 | 0.3720 |
| A | 816.0123  | 22.8582  | 9.6453  | 0.0889 | 0.1632 |
| A | 694.0807  | 5.6402   | 12.1002 | 0.0602 | 0.1136 |
| A | 673.1643  | 95.1768  | 0.7015  | 0.6000 | 0.7500 |
| A | 629.1531  | 19.3462  | 3.1301  | 0.5358 | 0.6978 |
| A | 573.0369  | 4.3875   | 1.6268  | 0.6617 | 0.7964 |
| A | 556.7130  | 37.7025  | 1.9849  | 0.2639 | 0.4176 |
| A | 548.2864  | 19.7316  | 1.2584  | 0.6750 | 0.8059 |

|   |          |         |         |        |        |
|---|----------|---------|---------|--------|--------|
| A | 536.6403 | 13.4438 | 0.7192  | 0.6710 | 0.8031 |
| A | 497.7097 | 13.1536 | 0.5616  | 0.7296 | 0.8437 |
| A | 474.5478 | 0.6439  | 0.5711  | 0.7209 | 0.8378 |
| A | 464.5066 | 1.3037  | 1.2042  | 0.3137 | 0.4776 |
| A | 456.2488 | 2.8186  | 6.4317  | 0.1809 | 0.3064 |
| A | 422.8455 | 12.1743 | 6.0133  | 0.7325 | 0.8456 |
| A | 374.8941 | 2.6829  | 4.7224  | 0.3323 | 0.4988 |
| A | 286.0329 | 1.6131  | 10.6375 | 0.2508 | 0.4010 |
| A | 269.4925 | 0.4333  | 0.7304  | 0.1756 | 0.2987 |
| A | 250.8778 | 1.9652  | 2.0401  | 0.2209 | 0.3619 |
| A | 218.8194 | 1.1714  | 2.3921  | 0.1766 | 0.3002 |
| A | 164.0012 | 1.7425  | 2.8366  | 0.3000 | 0.4615 |
| A | 150.8916 | 1.9067  | 1.7664  | 0.6873 | 0.8147 |
| A | 106.4806 | 1.4359  | 1.0500  | 0.5291 | 0.6920 |
| A | 101.4911 | 3.4056  | 0.8816  | 0.7460 | 0.8545 |
| A | 85.5975  | 2.5012  | 0.6826  | 0.5890 | 0.7413 |
| A | 77.7040  | 3.0430  | 0.3210  | 0.5350 | 0.6970 |
| A | 57.3431  | 1.7902  | 0.5773  | 0.6860 | 0.8137 |
| A | 54.1366  | 0.6409  | 0.5787  | 0.6923 | 0.8182 |
| A | 48.3104  | 2.9848  | 2.2690  | 0.6668 | 0.8001 |
| A | 43.3705  | 2.0589  | 0.5256  | 0.7320 | 0.8452 |
| A | 30.0086  | 0.3540  | 0.8407  | 0.7057 | 0.8275 |
| A | 25.2666  | 0.5574  | 0.2926  | 0.7456 | 0.8543 |

Processing aupcphexdienic5sm6psd1pbedcms.log  
PG=C01

Method BasisSet Imaginary Freqs  
RPBE1PBE GenECP 0

HF Energy  
-1017.9611714

| ZPE       | E298    | S298    | Squasihar | Equasihar | Strans | Srot   |
|-----------|---------|---------|-----------|-----------|--------|--------|
| 158.40804 | 169.338 | 141.489 | 133.624   | 169.389   | 43.828 | 33.909 |

31

|   |          |           |           |
|---|----------|-----------|-----------|
| C | 1.040179 | 3.882877  | 0.578252  |
| C | 0.082942 | 2.731589  | 0.243902  |
| C | 1.003991 | 1.607514  | -0.191632 |
| C | 2.407600 | 2.161109  | -0.398424 |
| C | 2.200410 | 3.679777  | -0.397314 |
| C | 0.695240 | 0.344785  | -0.374248 |
| C | 0.660753 | -0.985463 | -0.630829 |
| C | 1.117294 | -2.067663 | 0.326618  |
| C | 2.504438 | -2.584503 | -0.053571 |
| C | 3.619341 | -1.647795 | 0.323089  |

|    |           |           |           |
|----|-----------|-----------|-----------|
| O  | 4.742200  | -1.903638 | -0.362357 |
| Au | -1.446246 | -0.358235 | -0.112679 |
| P  | -3.713994 | -0.302219 | 0.336041  |
| O  | 3.555161  | -0.779859 | 1.169259  |
| H  | -4.276711 | 0.980042  | 0.449499  |
| H  | -4.545144 | -0.908929 | -0.620155 |
| H  | -4.127605 | -0.917135 | 1.529057  |
| H  | 0.524028  | -1.299689 | -1.670995 |
| H  | 1.127115  | -1.690626 | 1.352258  |
| H  | 0.416779  | -2.907129 | 0.278590  |
| H  | 2.703055  | -3.522886 | 0.481244  |
| H  | 2.573657  | -2.821617 | -1.120415 |
| H  | 5.438978  | -1.307252 | -0.036358 |
| H  | 3.027624  | 1.856587  | 0.454007  |
| H  | 2.881614  | 1.773657  | -1.304748 |
| H  | -0.562213 | 3.008665  | -0.600260 |
| H  | -0.567783 | 2.438678  | 1.073613  |
| H  | 3.106471  | 4.221743  | -0.109425 |
| H  | 1.909845  | 4.019933  | -1.399356 |
| H  | 0.561770  | 4.862383  | 0.484368  |
| H  | 1.399816  | 3.781999  | 1.609843  |

WARNING: Geometry optimization converged in opt job, but not in freq job

Population analysis using the SCF density.

| Label | Frequencies | IR Inten | Raman Activ | Depolar (P) | Depolar (U) | Dipole |
|-------|-------------|----------|-------------|-------------|-------------|--------|
| A     | 3749.1608   | 167.0070 | 189.6505    | 0.2093      | 0.3462      | 7.7776 |
| A     | 3167.6095   | 5.2258   | 101.9763    | 0.5727      | 0.7283      |        |
| A     | 3146.3567   | 37.1100  | 239.3966    | 0.7370      | 0.8486      |        |
| A     | 3142.2313   | 29.8524  | 229.0843    | 0.7490      | 0.8565      |        |
| A     | 3138.6601   | 2.3285   | 189.7046    | 0.7431      | 0.8526      |        |
| A     | 3135.9853   | 36.6402  | 384.9329    | 0.2591      | 0.4115      |        |
| A     | 3132.9768   | 17.9524  | 182.5043    | 0.2749      | 0.4312      |        |
| A     | 3130.4122   | 1.1443   | 436.8156    | 0.2493      | 0.3992      |        |
| A     | 3103.9307   | 13.9508  | 372.4246    | 0.0593      | 0.1120      |        |
| A     | 3081.1760   | 8.4863   | 328.5393    | 0.1244      | 0.2212      |        |
| A     | 3078.2441   | 14.1067  | 245.8792    | 0.0835      | 0.1541      |        |
| A     | 3076.1551   | 45.6783  | 78.3891     | 0.7277      | 0.8424      |        |
| A     | 3072.0092   | 38.4805  | 578.0531    | 0.0817      | 0.1511      |        |
| A     | 3065.4142   | 15.6591  | 242.8522    | 0.0951      | 0.1736      |        |
| A     | 2562.8264   | 0.3367   | 320.2965    | 0.7375      | 0.8489      |        |
| A     | 2559.1200   | 0.3733   | 308.5224    | 0.6920      | 0.8180      |        |
| A     | 2538.2892   | 9.7080   | 853.6921    | 0.0188      | 0.0369      |        |
| A     | 1972.1534   | 37.5824  | 96.2902     | 0.5491      | 0.7090      |        |
| A     | 1823.6544   | 459.0587 | 14.9463     | 0.1863      | 0.3141      |        |
| A     | 1488.8107   | 0.4048   | 2.2131      | 0.7396      | 0.8503      |        |
| A     | 1474.2494   | 8.8955   | 27.8273     | 0.7494      | 0.8568      |        |

|   |           |          |         |        |        |
|---|-----------|----------|---------|--------|--------|
| A | 1463.8807 | 41.9286  | 10.6916 | 0.7238 | 0.8398 |
| A | 1454.4272 | 18.0244  | 32.0188 | 0.6730 | 0.8046 |
| A | 1451.1661 | 17.0039  | 17.0916 | 0.6293 | 0.7725 |
| A | 1446.3286 | 32.5478  | 13.3275 | 0.2434 | 0.3915 |
| A | 1432.5751 | 79.2052  | 22.8849 | 0.3973 | 0.5687 |
| A | 1426.3309 | 47.9742  | 23.5013 | 0.7279 | 0.8425 |
| A | 1352.6120 | 3.9129   | 10.3134 | 0.7290 | 0.8432 |
| A | 1345.7307 | 3.1549   | 12.3828 | 0.7379 | 0.8492 |
| A | 1331.4645 | 2.8723   | 7.7768  | 0.7262 | 0.8414 |
| A | 1327.5435 | 4.6076   | 14.4750 | 0.5248 | 0.6884 |
| A | 1317.3770 | 17.7928  | 8.6823  | 0.4785 | 0.6473 |
| A | 1296.6769 | 1.5003   | 8.5466  | 0.5756 | 0.7307 |
| A | 1251.8094 | 3.5162   | 24.7304 | 0.7493 | 0.8567 |
| A | 1248.0498 | 19.2274  | 14.2159 | 0.5768 | 0.7316 |
| A | 1236.1160 | 12.8995  | 49.6559 | 0.1751 | 0.2980 |
| A | 1231.9847 | 5.6472   | 13.0536 | 0.6002 | 0.7502 |
| A | 1209.9593 | 111.1759 | 16.8904 | 0.2179 | 0.3579 |
| A | 1175.3838 | 216.0205 | 0.7212  | 0.3123 | 0.4759 |
| A | 1165.0727 | 48.9936  | 7.9922  | 0.4300 | 0.6014 |
| A | 1153.3266 | 0.8079   | 6.1073  | 0.3149 | 0.4789 |
| A | 1145.6050 | 2.8154   | 4.7726  | 0.7315 | 0.8450 |
| A | 1118.5020 | 9.4189   | 39.9119 | 0.7490 | 0.8565 |
| A | 1113.4398 | 9.7940   | 38.1461 | 0.7497 | 0.8569 |
| A | 1070.5813 | 30.1283  | 27.6785 | 0.2910 | 0.4508 |
| A | 1061.9063 | 0.5724   | 13.0380 | 0.7260 | 0.8412 |
| A | 1041.4015 | 2.3914   | 14.2299 | 0.7393 | 0.8501 |
| A | 1034.8390 | 6.5495   | 6.2940  | 0.5035 | 0.6697 |
| A | 975.7625  | 241.0404 | 26.1780 | 0.7446 | 0.8536 |
| A | 971.0024  | 9.7641   | 21.0858 | 0.4918 | 0.6594 |
| A | 970.2220  | 7.5664   | 3.5476  | 0.4903 | 0.6580 |
| A | 928.2079  | 4.6722   | 16.9559 | 0.1024 | 0.1858 |
| A | 917.0281  | 0.8070   | 3.0522  | 0.7499 | 0.8571 |
| A | 900.6455  | 27.4653  | 20.4253 | 0.5936 | 0.7450 |
| A | 887.7949  | 33.4335  | 14.5297 | 0.2721 | 0.4278 |
| A | 876.7327  | 4.1912   | 2.2726  | 0.7353 | 0.8475 |
| A | 848.1683  | 4.2814   | 15.3450 | 0.1947 | 0.3260 |
| A | 824.2824  | 35.0414  | 16.2049 | 0.0659 | 0.1236 |
| A | 713.2563  | 3.0441   | 22.7377 | 0.0631 | 0.1188 |
| A | 669.8624  | 102.8094 | 0.6277  | 0.2174 | 0.3572 |
| A | 631.3795  | 54.9786  | 3.7313  | 0.6696 | 0.8021 |
| A | 580.1650  | 9.3124   | 5.6547  | 0.7464 | 0.8548 |
| A | 563.8350  | 53.6569  | 20.6986 | 0.4992 | 0.6660 |
| A | 556.5641  | 22.3254  | 4.5618  | 0.7486 | 0.8562 |
| A | 540.9090  | 27.8295  | 3.6379  | 0.4501 | 0.6208 |
| A | 527.2571  | 23.4790  | 1.9364  | 0.6976 | 0.8219 |
| A | 511.8321  | 2.1312   | 1.2330  | 0.5254 | 0.6888 |
| A | 484.7983  | 0.5621   | 1.3817  | 0.7498 | 0.8570 |

|   |          |         |         |        |        |
|---|----------|---------|---------|--------|--------|
| A | 463.3477 | 4.8844  | 14.6010 | 0.2837 | 0.4420 |
| A | 422.9321 | 13.4116 | 17.9786 | 0.7441 | 0.8533 |
| A | 375.4143 | 5.4147  | 12.7850 | 0.3163 | 0.4806 |
| A | 311.7320 | 7.9330  | 14.4328 | 0.2551 | 0.4065 |
| A | 266.5972 | 5.7238  | 3.6490  | 0.2961 | 0.4570 |
| A | 260.0849 | 1.9899  | 1.8686  | 0.6652 | 0.7989 |
| A | 218.5218 | 1.8061  | 3.4609  | 0.4154 | 0.5870 |
| A | 174.3974 | 4.1604  | 4.8497  | 0.4395 | 0.6106 |
| A | 170.7467 | 1.9546  | 4.5514  | 0.7452 | 0.8540 |
| A | 109.1480 | 0.8943  | 0.3426  | 0.7432 | 0.8527 |
| A | 104.0574 | 0.4587  | 1.7974  | 0.7430 | 0.8525 |
| A | 92.9323  | 1.7855  | 0.9887  | 0.6300 | 0.7730 |
| A | 88.9242  | 1.4315  | 1.3536  | 0.6656 | 0.7992 |
| A | 71.4892  | 3.5865  | 0.5907  | 0.7497 | 0.8569 |
| A | 65.6322  | 1.3457  | 0.9161  | 0.7491 | 0.8565 |
| A | 53.4597  | 2.6966  | 1.4862  | 0.7408 | 0.8511 |
| A | 52.2821  | 4.1821  | 1.9151  | 0.7231 | 0.8393 |
| A | 47.7810  | 1.9889  | 0.2924  | 0.7464 | 0.8548 |
| A | 35.3361  | 0.5154  | 1.7290  | 0.7496 | 0.8569 |

5-exo-trig prod for 4,5-Au-PH3 complex of 6,6-cyclopentano-hexa-4,5-dienoic acid:

Processing aupcphexdienic5prod6psdm6.log

PG=C01

| Method | BasisSet | Imaginary Freqs |
|--------|----------|-----------------|
| RM06   | GenECP   | 0               |

HF Energy

-1018.2657303

| ZPE       | E298    | S298    | Squasihar | Equasihar | Strans | Srot   |
|-----------|---------|---------|-----------|-----------|--------|--------|
| 156.70126 | 167.822 | 144.106 | 134.307   | 167.879   | 43.828 | 33.788 |

31

|    |           |           |           |
|----|-----------|-----------|-----------|
| C  | 3.864339  | -1.403316 | 0.743847  |
| C  | 3.959442  | -0.792683 | -0.626333 |
| O  | 3.435634  | 0.243991  | -0.973923 |
| C  | 1.437498  | -0.943334 | 1.226007  |
| C  | 2.860353  | -0.690827 | 1.642331  |
| O  | 4.722145  | -1.532740 | -1.437929 |
| C  | 0.664298  | -0.005828 | 0.698261  |
| Au | -1.364302 | -0.431730 | 0.053117  |
| P  | -3.499615 | -1.240470 | -0.541500 |
| C  | 0.495203  | 1.299695  | 0.323968  |
| H  | -4.542832 | -0.300864 | -0.589775 |
| H  | -4.044742 | -2.220451 | 0.304106  |

|   |           |           |           |
|---|-----------|-----------|-----------|
| H | -3.616643 | -1.856071 | -1.798437 |
| C | 0.044166  | 2.416182  | 1.238895  |
| C | 0.758041  | 1.870519  | -1.035836 |
| H | 1.058841  | -1.958211 | 1.358139  |
| H | 3.063997  | 0.387011  | 1.641545  |
| H | 2.992415  | -1.050003 | 2.671024  |
| H | 4.870497  | -1.369287 | 1.182839  |
| H | 3.634210  | -2.471487 | 0.633094  |
| H | 4.786774  | -1.078044 | -2.293253 |
| C | -0.044334 | 3.169240  | -1.053610 |
| H | 1.842569  | 2.082626  | -1.035099 |
| H | 0.594694  | 1.166209  | -1.856709 |
| C | 0.125962  | 3.683602  | 0.376052  |
| H | -0.981763 | 2.232092  | 1.584035  |
| H | 0.665802  | 2.430055  | 2.144457  |
| H | -0.617162 | 4.432628  | 0.663249  |
| H | 1.114917  | 4.146957  | 0.485556  |
| H | 0.304396  | 3.874911  | -1.812670 |
| H | -1.103951 | 2.956123  | -1.262536 |

WARNING: Geometry optimization converged in opt job, but not in freq job

Population analysis using the SCF density.

| Label | Frequencies | IR Inten | Raman Activ | Depolar (P) | Depolar (U) | Dipole |
|-------|-------------|----------|-------------|-------------|-------------|--------|
| A     | 3804.2157   | 120.9989 | 97.8261     | 0.2169      | 0.3565      | 4.1417 |
| A     | 3147.5906   | 1.7039   | 70.4605     | 0.2178      | 0.3577      |        |
| A     | 3131.0936   | 10.2178  | 101.5669    | 0.7369      | 0.8485      |        |
| A     | 3127.0679   | 10.8031  | 181.3059    | 0.2411      | 0.3885      |        |
| A     | 3125.3550   | 5.6267   | 34.4757     | 0.4482      | 0.6190      |        |
| A     | 3106.9261   | 4.2037   | 34.6085     | 0.6897      | 0.8164      |        |
| A     | 3097.1354   | 0.5140   | 145.2522    | 0.5838      | 0.7372      |        |
| A     | 3092.1451   | 4.3676   | 38.2255     | 0.5126      | 0.6777      |        |
| A     | 3057.7947   | 18.1580  | 110.0595    | 0.1755      | 0.2986      |        |
| A     | 3049.8060   | 6.3060   | 164.1257    | 0.1081      | 0.1951      |        |
| A     | 3046.1317   | 10.6858  | 35.2182     | 0.5001      | 0.6668      |        |
| A     | 3045.1884   | 11.4529  | 247.1740    | 0.0534      | 0.1013      |        |
| A     | 3028.1890   | 20.3251  | 65.7362     | 0.1306      | 0.2311      |        |
| A     | 3001.4619   | 17.4413  | 231.9558    | 0.1367      | 0.2405      |        |
| A     | 2541.1956   | 0.6408   | 130.0591    | 0.7308      | 0.8445      |        |
| A     | 2538.2207   | 0.8174   | 122.4631    | 0.7469      | 0.8551      |        |
| A     | 2516.7268   | 13.7447  | 448.8494    | 0.0559      | 0.1059      |        |
| A     | 1879.0056   | 22.7806  | 63.7367     | 0.6896      | 0.8163      |        |
| A     | 1850.4314   | 316.6806 | 4.4825      | 0.0706      | 0.1319      |        |
| A     | 1476.2904   | 8.0724   | 2.8080      | 0.4583      | 0.6285      |        |
| A     | 1462.7565   | 9.7414   | 10.9760     | 0.7494      | 0.8567      |        |
| A     | 1445.3943   | 86.0567  | 8.0107      | 0.6451      | 0.7843      |        |
| A     | 1439.3226   | 56.1840  | 7.7300      | 0.6982      | 0.8223      |        |

|   |           |          |         |        |        |
|---|-----------|----------|---------|--------|--------|
| A | 1427.6785 | 48.8767  | 28.6956 | 0.1926 | 0.3231 |
| A | 1418.5120 | 39.8179  | 24.2906 | 0.5749 | 0.7301 |
| A | 1412.9371 | 14.9691  | 7.7265  | 0.5938 | 0.7452 |
| A | 1402.5230 | 34.8590  | 9.3543  | 0.6710 | 0.8031 |
| A | 1340.7987 | 1.7738   | 2.8054  | 0.6441 | 0.7835 |
| A | 1329.2393 | 7.0318   | 4.8601  | 0.7342 | 0.8467 |
| A | 1320.7450 | 0.4812   | 2.1635  | 0.7482 | 0.8560 |
| A | 1310.3799 | 6.8605   | 13.3410 | 0.3855 | 0.5565 |
| A | 1302.8030 | 28.7550  | 3.6617  | 0.5535 | 0.7126 |
| A | 1280.9307 | 4.5974   | 3.3232  | 0.7488 | 0.8564 |
| A | 1247.3688 | 2.8726   | 7.3634  | 0.6834 | 0.8119 |
| A | 1232.5438 | 15.5155  | 3.8933  | 0.7251 | 0.8407 |
| A | 1229.2086 | 17.8083  | 19.8623 | 0.2577 | 0.4099 |
| A | 1203.9486 | 1.4964   | 2.9149  | 0.7092 | 0.8298 |
| A | 1197.6121 | 110.8182 | 1.8593  | 0.2698 | 0.4250 |
| A | 1169.9110 | 78.3827  | 0.8946  | 0.5223 | 0.6862 |
| A | 1168.1177 | 66.6817  | 3.8263  | 0.6521 | 0.7894 |
| A | 1143.0265 | 13.2669  | 9.7972  | 0.3955 | 0.5668 |
| A | 1128.6374 | 26.8201  | 1.9149  | 0.3971 | 0.5685 |
| A | 1121.7927 | 2.0189   | 15.4073 | 0.7494 | 0.8568 |
| A | 1119.3585 | 2.7576   | 16.1606 | 0.7498 | 0.8570 |
| A | 1069.7529 | 16.2609  | 9.0053  | 0.2236 | 0.3655 |
| A | 1057.1405 | 8.3364   | 3.3607  | 0.6272 | 0.7709 |
| A | 1036.8086 | 2.2188   | 6.4294  | 0.7410 | 0.8513 |
| A | 999.2994  | 189.0050 | 16.6006 | 0.6382 | 0.7792 |
| A | 984.9133  | 8.1597   | 2.7490  | 0.7224 | 0.8388 |
| A | 962.1078  | 7.9645   | 1.8945  | 0.6464 | 0.7852 |
| A | 957.3979  | 25.2312  | 6.0499  | 0.3335 | 0.5002 |
| A | 922.4968  | 1.3950   | 9.9095  | 0.0449 | 0.0859 |
| A | 892.3347  | 8.0990   | 3.3542  | 0.1357 | 0.2390 |
| A | 891.9769  | 7.7748   | 1.0596  | 0.6141 | 0.7609 |
| A | 867.9084  | 10.7244  | 2.4975  | 0.7390 | 0.8499 |
| A | 855.8021  | 0.9129   | 6.1985  | 0.3406 | 0.5081 |
| A | 826.0363  | 7.4131   | 7.2873  | 0.2084 | 0.3450 |
| A | 808.5181  | 19.8009  | 8.0524  | 0.0839 | 0.1547 |
| A | 694.7451  | 2.2114   | 5.4328  | 0.0340 | 0.0657 |
| A | 674.9854  | 105.3134 | 0.7406  | 0.6146 | 0.7613 |
| A | 625.4742  | 21.1856  | 3.1703  | 0.5281 | 0.6912 |
| A | 578.8977  | 19.9170  | 2.5387  | 0.7324 | 0.8455 |
| A | 562.6027  | 64.2173  | 6.3960  | 0.4384 | 0.6096 |
| A | 555.2986  | 5.1598   | 2.0050  | 0.1975 | 0.3299 |
| A | 521.4186  | 12.1970  | 0.5090  | 0.4513 | 0.6219 |
| A | 517.0656  | 11.1802  | 5.0786  | 0.1804 | 0.3057 |
| A | 486.7585  | 13.0182  | 3.1941  | 0.5257 | 0.6891 |
| A | 476.9577  | 5.2442   | 0.3885  | 0.3216 | 0.4867 |
| A | 469.9122  | 4.9370   | 0.4512  | 0.0753 | 0.1400 |
| A | 424.5951  | 5.7965   | 2.1502  | 0.7497 | 0.8570 |



|   |          |        |         |        |        |
|---|----------|--------|---------|--------|--------|
| A | 359.5243 | 3.1331 | 1.6381  | 0.5569 | 0.7154 |
| A | 283.5214 | 1.9673 | 12.2343 | 0.2052 | 0.3405 |
| A | 268.3956 | 3.7454 | 3.2909  | 0.6115 | 0.7590 |
| A | 261.1139 | 1.1103 | 0.4947  | 0.7484 | 0.8561 |
| A | 204.8279 | 1.4040 | 2.7586  | 0.1719 | 0.2934 |
| A | 190.1827 | 0.3437 | 2.3911  | 0.5323 | 0.6948 |
| A | 143.0305 | 0.7097 | 0.1627  | 0.6010 | 0.7508 |
| A | 112.5644 | 4.5230 | 2.1717  | 0.6415 | 0.7816 |
| A | 98.2638  | 4.6650 | 1.5272  | 0.5523 | 0.7116 |
| A | 89.3838  | 0.3011 | 1.2430  | 0.7086 | 0.8295 |
| A | 70.3090  | 1.9772 | 0.5321  | 0.7119 | 0.8317 |
| A | 67.3596  | 0.8099 | 0.4237  | 0.7431 | 0.8526 |
| A | 59.4816  | 4.7545 | 0.2119  | 0.5997 | 0.7498 |
| A | 52.8898  | 6.0905 | 2.1728  | 0.7499 | 0.8571 |
| A | 44.4117  | 0.2054 | 2.0295  | 0.7440 | 0.8532 |
| A | 42.0304  | 1.4911 | 1.6861  | 0.5473 | 0.7075 |
| A | 28.1104  | 0.2453 | 1.9627  | 0.7447 | 0.8537 |

Processing aupcphexdienic5prod6psd1pbetols.log  
PG=C01

Method BasisSet Imaginary Freqs  
RPBE1PBE GenECP 0

HF Energy  
-1017.9138387

|    | ZPE       | E298      | S298      | Squasihar | Equasihar | Strans | Srot   |
|----|-----------|-----------|-----------|-----------|-----------|--------|--------|
|    | 160.06595 | 170.279   | 133.847   | 128.653   | 170.314   | 43.828 | 33.820 |
| 31 |           |           |           |           |           |        |        |
| C  | 2.687024  | -2.735128 | 0.645106  |           |           |        |        |
| C  | 3.503209  | -1.730084 | -0.067237 |           |           |        |        |
| O  | 2.873530  | -0.788575 | -0.616621 |           |           |        |        |
| C  | 1.302481  | -1.013537 | -0.378629 |           |           |        |        |
| C  | 1.354171  | -2.001277 | 0.791219  |           |           |        |        |
| O  | 4.788049  | -1.813869 | -0.143196 |           |           |        |        |
| C  | 0.546246  | 0.228989  | -0.174287 |           |           |        |        |
| Au | -1.474406 | -0.203889 | -0.068046 |           |           |        |        |
| P  | -3.756179 | -0.649811 | 0.029592  |           |           |        |        |
| C  | 1.013126  | 1.486715  | -0.081422 |           |           |        |        |
| H  | -4.580374 | 0.340397  | 0.597114  |           |           |        |        |
| H  | -4.172663 | -1.775895 | 0.764879  |           |           |        |        |
| H  | -4.431848 | -0.877398 | -1.184470 |           |           |        |        |
| C  | 0.126405  | 2.697592  | 0.154710  |           |           |        |        |
| C  | 2.454632  | 1.986681  | -0.168370 |           |           |        |        |
| H  | 1.052477  | -1.505306 | -1.324943 |           |           |        |        |

|   |           |           |           |
|---|-----------|-----------|-----------|
| H | 1.318208  | -1.446877 | 1.733343  |
| H | 0.499765  | -2.679044 | 0.758754  |
| H | 3.159766  | -3.051772 | 1.577850  |
| H | 2.622961  | -3.617447 | -0.008195 |
| H | 5.167803  | -1.086516 | -0.671715 |
| C | 2.352622  | 3.517825  | -0.121412 |
| H | 3.026793  | 1.621572  | 0.695863  |
| H | 2.969364  | 1.631331  | -1.065252 |
| C | 1.074378  | 3.778890  | 0.675200  |
| H | -0.304248 | 3.020689  | -0.804398 |
| H | -0.709681 | 2.475135  | 0.825482  |
| H | 0.683617  | 4.792472  | 0.544309  |
| H | 1.262389  | 3.630992  | 1.746683  |
| H | 3.240178  | 3.987620  | 0.313958  |
| H | 2.237853  | 3.914021  | -1.138261 |

Population analysis using the SCF density.

| Label | Frequencies | IR Inten | Raman Activ | Depolar (P) | Depolar (U) | Dipole |
|-------|-------------|----------|-------------|-------------|-------------|--------|
| A     | 3711.2906   | 257.8193 | 124.3024    | 0.2501      | 0.4001      | 7.8368 |
| A     | 3190.2677   | 1.1542   | 62.1293     | 0.5556      | 0.7144      |        |
| A     | 3172.7149   | 4.7474   | 158.5713    | 0.3457      | 0.5138      |        |
| A     | 3140.9867   | 43.7059  | 174.5329    | 0.6367      | 0.7780      |        |
| A     | 3135.8704   | 27.6520  | 150.8159    | 0.7247      | 0.8404      |        |
| A     | 3129.7437   | 30.5736  | 305.6989    | 0.1865      | 0.3144      |        |
| A     | 3124.9820   | 28.9945  | 53.6469     | 0.5207      | 0.6848      |        |
| A     | 3124.3367   | 7.3932   | 54.4935     | 0.2654      | 0.4195      |        |
| A     | 3116.5377   | 1.0142   | 193.4965    | 0.1074      | 0.1940      |        |
| A     | 3077.7975   | 10.4210  | 223.7540    | 0.1415      | 0.2480      |        |
| A     | 3073.8399   | 42.4766  | 124.9682    | 0.2616      | 0.4147      |        |
| A     | 3067.1201   | 36.6768  | 202.1456    | 0.1354      | 0.2385      |        |
| A     | 3056.5340   | 24.9706  | 196.5786    | 0.0789      | 0.1462      |        |
| A     | 3047.4733   | 15.8015  | 182.3294    | 0.1183      | 0.2116      |        |
| A     | 2535.5372   | 3.3910   | 237.9270    | 0.7421      | 0.8519      |        |
| A     | 2533.2483   | 4.4398   | 242.3783    | 0.6349      | 0.7767      |        |
| A     | 2517.4918   | 36.6258  | 742.4994    | 0.0556      | 0.1053      |        |
| A     | 1727.9567   | 41.2539  | 134.8300    | 0.2649      | 0.4189      |        |
| A     | 1677.0404   | 865.0838 | 6.4532      | 0.3044      | 0.4668      |        |
| A     | 1577.6925   | 119.7952 | 21.8602     | 0.1272      | 0.2257      |        |
| A     | 1503.0615   | 0.7817   | 1.8245      | 0.6906      | 0.8170      |        |
| A     | 1486.7400   | 6.9879   | 6.9681      | 0.7256      | 0.8410      |        |
| A     | 1485.7435   | 7.8963   | 20.9898     | 0.7499      | 0.8570      |        |
| A     | 1468.0272   | 9.0744   | 8.2945      | 0.6882      | 0.8153      |        |
| A     | 1462.9303   | 7.8283   | 9.8905      | 0.7500      | 0.8571      |        |
| A     | 1425.6981   | 49.4704  | 18.7128     | 0.5743      | 0.7296      |        |
| A     | 1381.6594   | 73.7177  | 21.2755     | 0.6498      | 0.7877      |        |
| A     | 1351.7421   | 2.0276   | 1.5949      | 0.4206      | 0.5921      |        |
| A     | 1339.8005   | 0.8122   | 3.0056      | 0.5350      | 0.6971      |        |

|   |           |          |         |        |        |
|---|-----------|----------|---------|--------|--------|
| A | 1331.5917 | 7.5493   | 8.5866  | 0.4936 | 0.6609 |
| A | 1321.1022 | 26.0734  | 14.0415 | 0.5841 | 0.7375 |
| A | 1309.8154 | 28.4237  | 5.7525  | 0.2537 | 0.4047 |
| A | 1302.8059 | 1.0715   | 7.3060  | 0.6604 | 0.7954 |
| A | 1274.8802 | 50.4862  | 3.7688  | 0.7168 | 0.8350 |
| A | 1260.5074 | 3.9872   | 14.5608 | 0.6770 | 0.8074 |
| A | 1242.9739 | 5.1293   | 4.9743  | 0.7339 | 0.8465 |
| A | 1234.1212 | 37.4826  | 9.0023  | 0.4889 | 0.6567 |
| A | 1213.5702 | 79.9639  | 5.0810  | 0.7496 | 0.8569 |
| A | 1199.6681 | 18.2741  | 2.1794  | 0.5656 | 0.7225 |
| A | 1192.8496 | 10.1028  | 17.1113 | 0.1547 | 0.2679 |
| A | 1180.6791 | 7.6981   | 3.0108  | 0.2133 | 0.3516 |
| A | 1151.9014 | 3.4304   | 3.8258  | 0.1846 | 0.3117 |
| A | 1127.0305 | 7.4115   | 22.4268 | 0.7372 | 0.8487 |
| A | 1124.4615 | 5.7501   | 29.3854 | 0.7300 | 0.8439 |
| A | 1113.4961 | 47.8443  | 32.6843 | 0.5829 | 0.7365 |
| A | 1074.6566 | 15.5063  | 16.3513 | 0.7490 | 0.8565 |
| A | 1053.7704 | 5.0330   | 12.6947 | 0.4319 | 0.6033 |
| A | 1032.4585 | 2.4156   | 11.8186 | 0.4016 | 0.5731 |
| A | 1021.3316 | 15.6115  | 21.7309 | 0.4089 | 0.5804 |
| A | 998.2373  | 229.7401 | 41.7988 | 0.7239 | 0.8399 |
| A | 990.3927  | 1.4486   | 9.8577  | 0.5129 | 0.6780 |
| A | 965.2390  | 0.5588   | 11.2603 | 0.2116 | 0.3493 |
| A | 938.7012  | 3.5538   | 16.3775 | 0.0932 | 0.1705 |
| A | 927.4577  | 0.2127   | 4.5336  | 0.1675 | 0.2869 |
| A | 920.0107  | 62.5698  | 6.4621  | 0.3000 | 0.4615 |
| A | 878.5738  | 4.6668   | 3.0672  | 0.2755 | 0.4320 |
| A | 863.7474  | 14.9123  | 6.4465  | 0.5714 | 0.7272 |
| A | 845.4956  | 32.1825  | 1.5634  | 0.5406 | 0.7018 |
| A | 815.2602  | 4.0724   | 18.1384 | 0.2560 | 0.4077 |
| A | 733.4989  | 72.1313  | 3.4272  | 0.3162 | 0.4804 |
| A | 720.0373  | 99.7270  | 19.4529 | 0.1762 | 0.2996 |
| A | 681.2881  | 107.4883 | 3.1397  | 0.2752 | 0.4316 |
| A | 632.1534  | 12.4776  | 2.4008  | 0.7499 | 0.8571 |
| A | 600.8313  | 13.8851  | 2.9494  | 0.5982 | 0.7486 |
| A | 575.6787  | 0.8800   | 0.6912  | 0.3343 | 0.5011 |
| A | 529.9728  | 218.0376 | 33.9883 | 0.3855 | 0.5565 |
| A | 500.4755  | 98.2523  | 12.3799 | 0.5437 | 0.7044 |
| A | 496.9041  | 35.6772  | 20.3187 | 0.1760 | 0.2993 |
| A | 478.2996  | 0.6881   | 1.3986  | 0.1680 | 0.2877 |
| A | 468.2933  | 7.6731   | 5.8603  | 0.2303 | 0.3744 |
| A | 416.1149  | 70.2858  | 39.9435 | 0.3066 | 0.4693 |
| A | 358.1331  | 33.6655  | 7.2688  | 0.7374 | 0.8488 |
| A | 300.7626  | 2.5034   | 12.8371 | 0.1645 | 0.2825 |
| A | 288.5678  | 12.0335  | 10.2608 | 0.5688 | 0.7251 |
| A | 271.8529  | 1.3518   | 4.1718  | 0.4695 | 0.6390 |
| A | 238.0500  | 8.7650   | 11.4128 | 0.1882 | 0.3168 |

|   |          |         |        |        |        |
|---|----------|---------|--------|--------|--------|
| A | 186.3225 | 12.3613 | 7.5678 | 0.4971 | 0.6641 |
| A | 168.8044 | 3.7465  | 5.0801 | 0.4618 | 0.6318 |
| A | 133.0310 | 0.0697  | 1.0915 | 0.3728 | 0.5431 |
| A | 124.2060 | 2.8429  | 0.3600 | 0.4157 | 0.5872 |
| A | 110.7737 | 2.6375  | 0.8089 | 0.6597 | 0.7950 |
| A | 98.1616  | 1.2686  | 0.6103 | 0.7017 | 0.8247 |
| A | 79.8057  | 0.8869  | 1.1854 | 0.5465 | 0.7067 |
| A | 76.0050  | 0.4045  | 0.1741 | 0.3902 | 0.5613 |
| A | 55.0994  | 3.8583  | 1.8143 | 0.7496 | 0.8569 |
| A | 53.3610  | 4.9332  | 0.3509 | 0.7138 | 0.8330 |
| A | 40.6260  | 2.4866  | 1.2769 | 0.7250 | 0.8406 |

6-endo-dig prod for 4,5-Au-PH3 complex of 6,6-cyclopentano-hexa-4,5-dienoic acid:

Processing aupcphexdienic6prod6psdm6.log  
PG=C01

Method      BasisSet      Imaginary Freqs  
RM06      GenECP      0

HF Energy  
-1018.2520914

|  | ZPE       | E298    | S298    | Squasihar | Equasihar | Strans | Srot   |
|--|-----------|---------|---------|-----------|-----------|--------|--------|
|  | 158.11540 | 168.358 | 134.279 | 128.244   | 168.395   | 43.828 | 33.773 |

31

|    |           |           |           |
|----|-----------|-----------|-----------|
| C  | 3.193383  | -1.781428 | 0.013738  |
| O  | 2.965522  | -0.544318 | -0.100528 |
| C  | 1.577264  | 0.041495  | -0.139946 |
| C  | 0.529429  | -0.975478 | -0.339355 |
| C  | 0.812543  | -2.209863 | 0.524914  |
| C  | 2.159889  | -2.823856 | 0.150216  |
| C  | 1.660947  | 1.370572  | -0.043890 |
| Au | -1.471619 | -0.322092 | -0.078259 |
| P  | -3.767869 | 0.232718  | 0.155898  |
| O  | 4.434044  | -2.165368 | 0.022751  |
| C  | 2.937387  | 2.175989  | 0.058390  |
| C  | 0.487351  | 2.318502  | -0.022557 |
| H  | 0.549482  | -1.284317 | -1.401218 |
| H  | -4.574750 | 0.151434  | -0.993857 |
| H  | -4.102751 | 1.525011  | 0.601138  |
| H  | -4.531071 | -0.540266 | 1.049963  |
| H  | 0.810660  | -1.940936 | 1.589615  |
| H  | 0.035211  | -2.968263 | 0.393759  |
| H  | 2.534789  | -3.578777 | 0.852628  |
| H  | 2.105235  | -3.328514 | -0.827779 |

|   |           |           |           |
|---|-----------|-----------|-----------|
| H | 5.045505  | -1.414473 | -0.089404 |
| C | 1.089470  | 3.655812  | 0.419723  |
| H | 0.071224  | 2.404074  | -1.038512 |
| H | -0.326086 | 1.962223  | 0.623437  |
| H | 3.712321  | 1.835177  | -0.636727 |
| C | 2.491513  | 3.620758  | -0.178910 |
| H | 3.349692  | 2.068890  | 1.073629  |
| H | 0.495262  | 4.515342  | 0.095198  |
| H | 1.151236  | 3.693413  | 1.516279  |
| H | 3.175141  | 4.352642  | 0.261728  |
| H | 2.443236  | 3.824329  | -1.257633 |

Population analysis using the SCF density.

| Label | Frequencies | IR Inten | Raman Activ | Depolar (P) | Depolar (U) | Dipole |
|-------|-------------|----------|-------------|-------------|-------------|--------|
| A     | 3749.1627   | 197.7864 | 109.7215    | 0.3603      | 0.5298      | 3.4903 |
| A     | 3123.4920   | 18.8552  | 110.3980    | 0.7449      | 0.8538      |        |
| A     | 3122.5577   | 3.3155   | 67.4837     | 0.5133      | 0.6784      |        |
| A     | 3119.6735   | 20.7042  | 170.6082    | 0.2828      | 0.4409      |        |
| A     | 3103.5567   | 12.7765  | 78.7446     | 0.3041      | 0.4664      |        |
| A     | 3098.4034   | 2.6033   | 179.9125    | 0.3782      | 0.5489      |        |
| A     | 3074.1146   | 16.9329  | 80.7227     | 0.3739      | 0.5443      |        |
| A     | 3053.3129   | 12.7911  | 35.7638     | 0.2242      | 0.3662      |        |
| A     | 3047.1674   | 27.6400  | 45.3037     | 0.5827      | 0.7363      |        |
| A     | 3038.8905   | 22.0626  | 129.7522    | 0.1419      | 0.2486      |        |
| A     | 3028.9098   | 7.2989   | 174.8056    | 0.1078      | 0.1945      |        |
| A     | 3023.5783   | 7.8896   | 167.0980    | 0.0722      | 0.1346      |        |
| A     | 3017.1728   | 15.3970  | 118.4685    | 0.0271      | 0.0527      |        |
| A     | 2979.3543   | 9.2289   | 109.2738    | 0.1673      | 0.2866      |        |
| A     | 2523.8427   | 5.0174   | 135.2981    | 0.7426      | 0.8523      |        |
| A     | 2520.7096   | 6.3826   | 131.9097    | 0.6228      | 0.7676      |        |
| A     | 2503.8537   | 35.7943  | 421.0948    | 0.0554      | 0.1049      |        |
| A     | 1771.7072   | 47.4269  | 210.7750    | 0.2012      | 0.3350      |        |
| A     | 1649.3052   | 660.6763 | 96.4045     | 0.2279      | 0.3712      |        |
| A     | 1551.4380   | 228.5701 | 31.7373     | 0.2591      | 0.4116      |        |
| A     | 1477.6113   | 2.3747   | 1.9998      | 0.4904      | 0.6581      |        |
| A     | 1463.3148   | 9.9326   | 12.9888     | 0.7418      | 0.8518      |        |
| A     | 1459.0412   | 4.9752   | 8.7347      | 0.5561      | 0.7148      |        |
| A     | 1437.5628   | 8.6253   | 6.8208      | 0.6294      | 0.7726      |        |
| A     | 1428.5119   | 11.1533  | 6.6081      | 0.5697      | 0.7259      |        |
| A     | 1401.7630   | 60.0667  | 24.0010     | 0.4637      | 0.6336      |        |
| A     | 1342.4812   | 5.4773   | 1.1547      | 0.7496      | 0.8569      |        |
| A     | 1337.7814   | 0.8457   | 4.7690      | 0.6382      | 0.7792      |        |
| A     | 1330.6353   | 16.0539  | 2.1798      | 0.7498      | 0.8570      |        |
| A     | 1324.5776   | 0.4270   | 0.7139      | 0.6318      | 0.7744      |        |
| A     | 1317.9229   | 2.1813   | 5.3325      | 0.5934      | 0.7448      |        |
| A     | 1296.3223   | 9.0741   | 7.8005      | 0.3169      | 0.4813      |        |
| A     | 1289.6458   | 0.6501   | 4.9915      | 0.6722      | 0.8040      |        |

|   |           |          |         |        |        |
|---|-----------|----------|---------|--------|--------|
| A | 1248.6566 | 10.2702  | 11.1147 | 0.4333 | 0.6046 |
| A | 1244.2905 | 10.5807  | 17.4157 | 0.2199 | 0.3605 |
| A | 1225.1490 | 3.9546   | 4.2197  | 0.6853 | 0.8133 |
| A | 1220.6018 | 85.7361  | 7.4493  | 0.7281 | 0.8427 |
| A | 1200.4633 | 31.9141  | 37.7297 | 0.4663 | 0.6360 |
| A | 1185.1725 | 10.4101  | 4.1802  | 0.7112 | 0.8312 |
| A | 1165.5797 | 0.6244   | 3.0453  | 0.2451 | 0.3937 |
| A | 1145.5976 | 0.9266   | 1.3615  | 0.7356 | 0.8477 |
| A | 1128.0253 | 4.1588   | 15.2478 | 0.7464 | 0.8548 |
| A | 1127.3111 | 4.1805   | 14.9840 | 0.7390 | 0.8499 |
| A | 1104.4601 | 21.6424  | 14.4131 | 0.7483 | 0.8560 |
| A | 1093.4649 | 5.0372   | 61.3601 | 0.2546 | 0.4058 |
| A | 1045.4374 | 4.5889   | 27.2986 | 0.7500 | 0.8571 |
| A | 1035.8089 | 33.9809  | 40.3009 | 0.5453 | 0.7058 |
| A | 1015.2937 | 2.9714   | 5.7663  | 0.5087 | 0.6744 |
| A | 1009.2391 | 173.3053 | 5.5159  | 0.6746 | 0.8057 |
| A | 1005.7500 | 22.9106  | 17.8680 | 0.3500 | 0.5185 |
| A | 978.0651  | 1.7921   | 7.2810  | 0.3884 | 0.5595 |
| A | 962.8155  | 4.9508   | 22.0523 | 0.2579 | 0.4100 |
| A | 930.2211  | 0.1183   | 16.1404 | 0.1094 | 0.1972 |
| A | 908.9743  | 1.0152   | 1.3860  | 0.5456 | 0.7060 |
| A | 890.3538  | 10.8332  | 0.5217  | 0.5659 | 0.7228 |
| A | 876.9449  | 60.0483  | 50.8267 | 0.3503 | 0.5188 |
| A | 870.7984  | 8.6092   | 13.6098 | 0.3519 | 0.5206 |
| A | 847.8307  | 38.9947  | 27.7374 | 0.2752 | 0.4317 |
| A | 774.4914  | 81.0566  | 20.4598 | 0.6269 | 0.7707 |
| A | 745.8515  | 26.1206  | 26.0997 | 0.4801 | 0.6487 |
| A | 679.1184  | 97.5652  | 3.8370  | 0.6449 | 0.7841 |
| A | 658.8333  | 45.6344  | 13.4396 | 0.6648 | 0.7986 |
| A | 613.8503  | 3.4456   | 2.7239  | 0.6336 | 0.7757 |
| A | 583.4310  | 12.9830  | 6.4087  | 0.6540 | 0.7908 |
| A | 572.2046  | 12.7489  | 7.2601  | 0.1772 | 0.3010 |
| A | 554.7524  | 2.3042   | 5.3065  | 0.3008 | 0.4625 |
| A | 500.2568  | 1.8432   | 1.8013  | 0.5463 | 0.7066 |
| A | 489.9261  | 7.7321   | 5.9927  | 0.5921 | 0.7438 |
| A | 458.9794  | 0.2211   | 0.1731  | 0.7136 | 0.8329 |
| A | 441.3657  | 0.4608   | 0.4183  | 0.4315 | 0.6029 |
| A | 397.7384  | 2.4931   | 1.1348  | 0.4330 | 0.6043 |
| A | 358.5198  | 2.0608   | 16.8469 | 0.3270 | 0.4928 |
| A | 319.7031  | 2.8070   | 3.1962  | 0.4435 | 0.6145 |
| A | 304.5057  | 1.2324   | 2.1893  | 0.4785 | 0.6473 |
| A | 271.2574  | 0.0798   | 8.4692  | 0.1761 | 0.2995 |
| A | 259.5913  | 0.1733   | 0.3514  | 0.3288 | 0.4949 |
| A | 192.9815  | 0.1395   | 1.0547  | 0.1680 | 0.2876 |
| A | 167.5294  | 0.0285   | 2.6460  | 0.3376 | 0.5048 |
| A | 159.2991  | 0.0517   | 1.4625  | 0.4294 | 0.6008 |
| A | 140.8509  | 0.5825   | 1.7225  | 0.6126 | 0.7597 |

|   |          |        |        |        |        |
|---|----------|--------|--------|--------|--------|
| A | 101.5295 | 0.9986 | 0.1642 | 0.7477 | 0.8556 |
| A | 88.5487  | 0.7185 | 0.1480 | 0.4763 | 0.6453 |
| A | 78.9354  | 0.0803 | 0.0221 | 0.7141 | 0.8332 |
| A | 74.8020  | 1.3798 | 0.8521 | 0.5713 | 0.7272 |
| A | 60.5130  | 4.4620 | 0.7628 | 0.6557 | 0.7921 |
| A | 52.0992  | 3.6919 | 1.9229 | 0.6890 | 0.8159 |
| A | 28.1906  | 0.6978 | 0.3581 | 0.2950 | 0.4556 |

Processing aupcphexdienic6prod6psd1pbetols.log  
PG=C01

| Method   | BasisSet | Imaginary Freqs |
|----------|----------|-----------------|
| RPBE1PBE | GenECP   | 0               |

HF Energy  
-1017.9178832

| ZPE       | E298    | S298    | Squasihar | Equasihar | Strans | Srot   |
|-----------|---------|---------|-----------|-----------|--------|--------|
| 159.80847 | 169.928 | 133.886 | 127.296   | 169.969   | 43.828 | 33.751 |

31

|    |           |           |           |
|----|-----------|-----------|-----------|
| C  | 3.163496  | -1.795346 | 0.006789  |
| O  | 2.935420  | -0.556046 | -0.118859 |
| C  | 1.566812  | 0.029648  | -0.132476 |
| C  | 0.501457  | -0.977700 | -0.315925 |
| C  | 0.786774  | -2.207264 | 0.560211  |
| C  | 2.131430  | -2.831428 | 0.188251  |
| C  | 1.655492  | 1.359998  | -0.030335 |
| Au | -1.472998 | -0.319806 | -0.083248 |
| P  | -3.710241 | 0.258930  | 0.147069  |
| O  | 4.405446  | -2.170972 | -0.019613 |
| C  | 2.945223  | 2.152773  | 0.053192  |
| C  | 0.488784  | 2.319996  | 0.013160  |
| H  | 0.538556  | -1.302142 | -1.371799 |
| H  | -4.516653 | 0.231046  | -1.006400 |
| H  | -4.009584 | 1.545878  | 0.633368  |
| H  | -4.488183 | -0.526644 | 1.018489  |
| H  | 0.791316  | -1.931430 | 1.620498  |
| H  | 0.010549  | -2.964825 | 0.432332  |
| H  | 2.507723  | -3.559944 | 0.915392  |
| H  | 2.067734  | -3.364642 | -0.772119 |
| H  | 5.004694  | -1.414445 | -0.162450 |
| C  | 1.113826  | 3.660421  | 0.423525  |
| H  | 0.042710  | 2.398493  | -0.987677 |
| H  | -0.304504 | 1.981360  | 0.688979  |
| H  | 3.704693  | 1.803213  | -0.652328 |
| C  | 2.512571  | 3.603160  | -0.187150 |

H 3.370634 2.049025 1.061215  
H 0.526056 4.518304 0.084857  
H 1.186331 3.719014 1.516877  
H 3.207648 4.326596 0.248498  
H 2.458649 3.802492 -1.264812

WARNING: Geometry optimization converged in opt job, but not in freq job

Population analysis using the SCF density.

| Label | Frequencies | IR Inten | Raman Activ | Depolar (P) | Depolar (U) | Dipole |
|-------|-------------|----------|-------------|-------------|-------------|--------|
| A     | 3713.9113   | 222.3732 | 158.3805    | 0.3826      | 0.5535      | 3.8458 |
| A     | 3160.2185   | 5.0016   | 106.3145    | 0.5420      | 0.7030      |        |
| A     | 3149.3071   | 32.2998  | 183.9055    | 0.7464      | 0.8548      |        |
| A     | 3143.3789   | 30.9082  | 255.0358    | 0.3235      | 0.4888      |        |
| A     | 3134.7556   | 17.6051  | 163.2466    | 0.2256      | 0.3681      |        |
| A     | 3132.7612   | 3.0175   | 298.0860    | 0.3672      | 0.5372      |        |
| A     | 3108.1529   | 17.1088  | 133.1000    | 0.3473      | 0.5156      |        |
| A     | 3096.8550   | 15.2118  | 77.3024     | 0.1906      | 0.3202      |        |
| A     | 3078.8606   | 34.7746  | 69.6512     | 0.5736      | 0.7290      |        |
| A     | 3073.3562   | 28.2987  | 243.3908    | 0.1343      | 0.2368      |        |
| A     | 3064.5409   | 14.2569  | 265.3994    | 0.1219      | 0.2174      |        |
| A     | 3060.1248   | 7.2440   | 301.7965    | 0.0638      | 0.1199      |        |
| A     | 3056.4924   | 23.4738  | 145.7214    | 0.0383      | 0.0738      |        |
| A     | 2996.8672   | 13.1217  | 192.9123    | 0.1816      | 0.3074      |        |
| A     | 2534.4212   | 3.2384   | 199.7299    | 0.7443      | 0.8534      |        |
| A     | 2532.7908   | 3.2903   | 211.4603    | 0.7454      | 0.8541      |        |
| A     | 2517.0641   | 34.0199  | 655.0982    | 0.0434      | 0.0831      |        |
| A     | 1773.1923   | 54.4786  | 385.2851    | 0.2161      | 0.3554      |        |
| A     | 1639.1281   | 801.0067 | 128.9403    | 0.2251      | 0.3675      |        |
| A     | 1561.2248   | 286.5191 | 52.7843     | 0.2429      | 0.3909      |        |
| A     | 1501.5086   | 0.7148   | 3.2691      | 0.5469      | 0.7071      |        |
| A     | 1485.5235   | 9.7409   | 19.7150     | 0.7426      | 0.8523      |        |
| A     | 1484.1062   | 3.9213   | 16.1990     | 0.5620      | 0.7196      |        |
| A     | 1461.2552   | 9.9301   | 11.5445     | 0.6136      | 0.7605      |        |
| A     | 1449.2655   | 15.4461  | 13.8333     | 0.5284      | 0.6915      |        |
| A     | 1418.4963   | 78.4549  | 42.4359     | 0.4540      | 0.6245      |        |
| A     | 1357.5819   | 4.8571   | 1.3963      | 0.7439      | 0.8531      |        |
| A     | 1353.1801   | 0.8799   | 9.0669      | 0.6279      | 0.7714      |        |
| A     | 1347.8509   | 13.2294  | 3.5942      | 0.5499      | 0.7096      |        |
| A     | 1342.2587   | 4.0220   | 2.8653      | 0.7014      | 0.8245      |        |
| A     | 1334.4558   | 1.5965   | 6.8933      | 0.5250      | 0.6885      |        |
| A     | 1312.9986   | 14.0131  | 12.0368     | 0.4288      | 0.6002      |        |
| A     | 1306.2762   | 0.8182   | 6.8462      | 0.6659      | 0.7994      |        |
| A     | 1266.9745   | 18.2035  | 25.5219     | 0.2702      | 0.4254      |        |
| A     | 1261.7944   | 7.7218   | 22.4603     | 0.3252      | 0.4908      |        |
| A     | 1240.8175   | 6.4534   | 8.5076      | 0.6292      | 0.7724      |        |
| A     | 1237.4657   | 120.7348 | 25.6882     | 0.6115      | 0.7589      |        |



|   |           |          |          |        |        |
|---|-----------|----------|----------|--------|--------|
| A | 1213.0935 | 13.1596  | 58.2555  | 0.4366 | 0.6079 |
| A | 1196.8525 | 8.8604   | 7.7758   | 0.7443 | 0.8534 |
| A | 1187.6245 | 1.6114   | 2.6711   | 0.1537 | 0.2665 |
| A | 1159.9810 | 1.7618   | 2.1000   | 0.6869 | 0.8144 |
| A | 1128.2832 | 7.2928   | 22.9354  | 0.7418 | 0.8518 |
| A | 1125.3441 | 7.4698   | 23.5431  | 0.7125 | 0.8321 |
| A | 1112.7792 | 24.0771  | 27.0135  | 0.5911 | 0.7430 |
| A | 1111.1154 | 7.4674   | 86.8723  | 0.2949 | 0.4555 |
| A | 1058.2481 | 16.9123  | 55.4353  | 0.7493 | 0.8567 |
| A | 1050.1528 | 43.5210  | 33.4429  | 0.5833 | 0.7368 |
| A | 1031.5111 | 13.1204  | 6.5436   | 0.4273 | 0.5988 |
| A | 1019.1956 | 5.0655   | 20.4544  | 0.2079 | 0.3442 |
| A | 1002.3127 | 201.8316 | 30.2708  | 0.7085 | 0.8294 |
| A | 987.5312  | 0.8250   | 10.0322  | 0.5605 | 0.7184 |
| A | 971.0935  | 5.2389   | 31.7813  | 0.2790 | 0.4362 |
| A | 936.2685  | 1.6432   | 21.9512  | 0.1422 | 0.2490 |
| A | 923.8330  | 1.8202   | 3.2506   | 0.5237 | 0.6874 |
| A | 903.6322  | 14.7525  | 3.6307   | 0.2148 | 0.3536 |
| A | 888.6669  | 112.6783 | 117.6504 | 0.3769 | 0.5475 |
| A | 881.1134  | 6.4786   | 17.0333  | 0.3822 | 0.5530 |
| A | 856.9875  | 35.4059  | 31.1593  | 0.2933 | 0.4536 |
| A | 792.8199  | 90.9388  | 26.5529  | 0.6939 | 0.8193 |
| A | 760.9021  | 18.6126  | 33.7827  | 0.5075 | 0.6733 |
| A | 683.2727  | 35.1015  | 14.8616  | 0.7494 | 0.8567 |
| A | 659.6561  | 106.9997 | 7.1361   | 0.4368 | 0.6080 |
| A | 632.9486  | 3.7202   | 5.0923   | 0.5346 | 0.6967 |
| A | 594.2598  | 12.6479  | 8.9615   | 0.5806 | 0.7347 |
| A | 580.4064  | 24.6678  | 8.3199   | 0.1733 | 0.2954 |
| A | 566.4652  | 3.1252   | 6.2075   | 0.2885 | 0.4478 |
| A | 515.3435  | 2.8961   | 2.2991   | 0.5778 | 0.7324 |
| A | 498.8831  | 12.2489  | 7.3382   | 0.6143 | 0.7611 |
| A | 484.4283  | 0.2240   | 0.4982   | 0.7500 | 0.8571 |
| A | 477.6692  | 0.5502   | 1.7777   | 0.6309 | 0.7737 |
| A | 406.6083  | 2.8695   | 1.9620   | 0.4432 | 0.6142 |
| A | 365.5375  | 3.4965   | 24.1940  | 0.3572 | 0.5264 |
| A | 330.2589  | 2.4278   | 4.1435   | 0.2572 | 0.4092 |
| A | 308.5747  | 1.7992   | 2.7986   | 0.5933 | 0.7447 |
| A | 301.4197  | 0.7833   | 10.9294  | 0.1209 | 0.2157 |
| A | 259.3051  | 0.2516   | 0.6861   | 0.3213 | 0.4863 |
| A | 195.3507  | 0.1991   | 0.9925   | 0.1974 | 0.3297 |
| A | 172.1059  | 0.0040   | 2.9138   | 0.4137 | 0.5853 |
| A | 165.9228  | 0.1971   | 1.5557   | 0.4042 | 0.5757 |
| A | 142.3034  | 0.7531   | 2.6373   | 0.6035 | 0.7528 |
| A | 95.9222   | 0.2894   | 0.3516   | 0.6791 | 0.8089 |
| A | 87.5847   | 2.1621   | 0.4884   | 0.7261 | 0.8413 |
| A | 74.6542   | 3.6796   | 1.2580   | 0.5495 | 0.7093 |
| A | 66.1240   | 0.2524   | 0.1905   | 0.5466 | 0.7068 |

|   |         |        |        |        |        |
|---|---------|--------|--------|--------|--------|
| A | 56.3220 | 2.5227 | 1.1806 | 0.6971 | 0.8215 |
| A | 42.3326 | 4.0203 | 1.7336 | 0.7264 | 0.8415 |
| A | 35.4402 | 2.0504 | 0.4695 | 0.3272 | 0.4931 |

6-exo-dig prod for 4,5-Au-PH3 complex of 6,6-cyclopentano-hexa-4,5-dienoic acid:

Processing aupcphexdienic6xprod6psdm6.log  
PG=C01

|        |          |                 |
|--------|----------|-----------------|
| Method | BasisSet | Imaginary Freqs |
| RM06   | GenECP   | 0               |

HF Energy  
-1018.2328191

|           |         |         |           |           |        |        |
|-----------|---------|---------|-----------|-----------|--------|--------|
| ZPE       | E298    | S298    | Squasihar | Equasihar | Strans | Srot   |
| 157.97721 | 168.264 | 134.862 | 128.115   | 168.299   | 43.828 | 33.445 |

31

|    |           |           |           |
|----|-----------|-----------|-----------|
| O  | 2.625059  | -0.055199 | -0.673935 |
| C  | 1.340418  | -0.440775 | 0.025384  |
| C  | 1.336852  | -1.695101 | 0.475763  |
| C  | 2.535316  | -2.592685 | 0.442107  |
| C  | 3.814431  | -1.761669 | 0.524141  |
| C  | 3.719107  | -0.633801 | -0.418249 |
| C  | 0.408739  | 0.698324  | 0.109616  |
| Au | -1.587477 | -0.030340 | -0.036874 |
| P  | -3.860018 | -0.711857 | -0.209846 |
| O  | 4.789835  | -0.204170 | -0.999164 |
| H  | 3.902480  | -1.303592 | 1.524766  |
| H  | 4.735701  | -2.320373 | 0.338249  |
| H  | 2.511540  | -3.290525 | 1.284089  |
| H  | 2.536106  | -3.214122 | -0.465717 |
| H  | -4.141110 | -2.089899 | -0.269684 |
| H  | -4.589427 | -0.267245 | -1.328367 |
| H  | -4.737595 | -0.329814 | 0.821935  |
| C  | 0.687435  | 1.808054  | -0.927455 |
| C  | 0.629761  | 1.465025  | 1.437808  |
| H  | 0.403590  | -2.058192 | 0.898005  |
| H  | 4.608197  | 0.567244  | -1.570053 |
| H  | 0.715667  | 0.798940  | 2.304968  |
| C  | 1.874213  | 2.318996  | 1.179099  |
| H  | -0.235478 | 2.118972  | 1.614629  |
| H  | 0.969617  | 1.414452  | -1.911134 |
| H  | -0.235252 | 2.378438  | -1.084120 |
| C  | 1.759854  | 2.735140  | -0.300381 |
| H  | 2.724619  | 2.655340  | -0.819338 |

H 1.458304 3.784386 -0.390803  
H 1.945197 3.176395 1.856458  
H 2.782928 1.720205 1.354671

Population analysis using the SCF density.

| Label | Frequencies | IR Inten | Raman Activ | Depolar (P) | Depolar (U) | Dipole |
|-------|-------------|----------|-------------|-------------|-------------|--------|
| A     | 3722.1258   | 196.1056 | 62.2162     | 0.2933      | 0.4536      | 6.2380 |
| A     | 3206.1276   | 5.8733   | 56.3641     | 0.1958      | 0.3274      |        |
| A     | 3137.0448   | 0.5983   | 148.8974    | 0.3645      | 0.5343      |        |
| A     | 3119.3251   | 0.5012   | 109.9016    | 0.4191      | 0.5907      |        |
| A     | 3112.4913   | 39.9719  | 99.1033     | 0.4882      | 0.6561      |        |
| A     | 3105.4177   | 17.9396  | 146.7031    | 0.3747      | 0.5451      |        |
| A     | 3100.6697   | 10.7970  | 78.5095     | 0.4019      | 0.5733      |        |
| A     | 3091.4662   | 11.4921  | 39.1110     | 0.7473      | 0.8553      |        |
| A     | 3058.0755   | 17.5548  | 97.0121     | 0.0527      | 0.1002      |        |
| A     | 3037.7352   | 6.8840   | 105.2616    | 0.0736      | 0.1370      |        |
| A     | 3037.5716   | 75.7697  | 74.5211     | 0.2003      | 0.3338      |        |
| A     | 3035.5762   | 12.8330  | 148.8463    | 0.2215      | 0.3627      |        |
| A     | 3009.8681   | 5.8888   | 128.0907    | 0.0786      | 0.1458      |        |
| A     | 2997.4912   | 48.0718  | 65.7217     | 0.1768      | 0.3005      |        |
| A     | 2523.0185   | 6.6005   | 144.3606    | 0.6672      | 0.8004      |        |
| A     | 2518.1235   | 6.0833   | 128.9408    | 0.7349      | 0.8472      |        |
| A     | 2501.7783   | 47.0777  | 515.6969    | 0.0732      | 0.1364      |        |
| A     | 1753.0165   | 105.5865 | 113.3386    | 0.2610      | 0.4139      |        |
| A     | 1644.3450   | 694.9284 | 17.3920     | 0.1250      | 0.2222      |        |
| A     | 1571.7421   | 99.9206  | 34.0659     | 0.1317      | 0.2327      |        |
| A     | 1484.4957   | 7.0744   | 4.6205      | 0.5693      | 0.7255      |        |
| A     | 1464.2191   | 13.5550  | 3.7425      | 0.7481      | 0.8559      |        |
| A     | 1457.6682   | 7.8636   | 8.1845      | 0.7210      | 0.8379      |        |
| A     | 1453.5312   | 6.5411   | 21.2137     | 0.5733      | 0.7288      |        |
| A     | 1448.9392   | 6.3488   | 8.2554      | 0.6761      | 0.8067      |        |
| A     | 1406.6354   | 40.0508  | 8.6499      | 0.6612      | 0.7961      |        |
| A     | 1349.9450   | 1.9053   | 10.3302     | 0.3237      | 0.4891      |        |
| A     | 1324.5365   | 3.0007   | 15.1508     | 0.4308      | 0.6021      |        |
| A     | 1322.4917   | 3.8009   | 2.7500      | 0.6984      | 0.8224      |        |
| A     | 1314.3545   | 4.6703   | 4.6239      | 0.3078      | 0.4707      |        |
| A     | 1302.3782   | 3.9116   | 6.8117      | 0.3382      | 0.5054      |        |
| A     | 1283.9414   | 2.9663   | 7.3229      | 0.5866      | 0.7395      |        |
| A     | 1269.2227   | 1.7870   | 4.6924      | 0.6891      | 0.8159      |        |
| A     | 1247.0001   | 8.2545   | 10.4856     | 0.3787      | 0.5493      |        |
| A     | 1224.9837   | 15.0430  | 1.4118      | 0.7486      | 0.8562      |        |
| A     | 1217.5075   | 76.1988  | 13.4644     | 0.4876      | 0.6556      |        |
| A     | 1207.6387   | 14.5581  | 6.1217      | 0.2627      | 0.4161      |        |
| A     | 1196.4187   | 5.3171   | 6.2165      | 0.1394      | 0.2447      |        |
| A     | 1183.5463   | 4.4405   | 23.2988     | 0.3046      | 0.4670      |        |
| A     | 1167.3313   | 10.5121  | 1.5123      | 0.7288      | 0.8431      |        |
| A     | 1129.1321   | 3.1931   | 16.0716     | 0.7495      | 0.8568      |        |

|   |           |          |         |        |        |
|---|-----------|----------|---------|--------|--------|
| A | 1125.7756 | 3.4002   | 16.3667 | 0.7469 | 0.8551 |
| A | 1099.7390 | 2.8980   | 4.7136  | 0.4459 | 0.6168 |
| A | 1083.2343 | 42.1118  | 9.6000  | 0.5851 | 0.7382 |
| A | 1053.1124 | 2.8582   | 24.2022 | 0.3968 | 0.5682 |
| A | 1042.0804 | 60.2681  | 3.5512  | 0.5702 | 0.7263 |
| A | 1031.4409 | 4.9946   | 4.3828  | 0.7194 | 0.8368 |
| A | 1028.8491 | 10.5267  | 3.0591  | 0.1177 | 0.2106 |
| A | 1011.9344 | 228.9287 | 16.4651 | 0.7432 | 0.8527 |
| A | 965.1948  | 18.8981  | 17.0963 | 0.0596 | 0.1124 |
| A | 941.7275  | 2.8335   | 9.6429  | 0.5540 | 0.7130 |
| A | 936.4755  | 21.0525  | 25.3650 | 0.4139 | 0.5855 |
| A | 919.2421  | 5.3662   | 6.2522  | 0.4120 | 0.5836 |
| A | 903.6641  | 8.2156   | 25.2456 | 0.5470 | 0.7072 |
| A | 897.6850  | 3.7151   | 38.2062 | 0.1392 | 0.2444 |
| A | 843.3148  | 24.8106  | 40.0868 | 0.2309 | 0.3752 |
| A | 827.7465  | 136.8490 | 8.8294  | 0.7500 | 0.8571 |
| A | 820.0941  | 19.8156  | 2.1467  | 0.7254 | 0.8408 |
| A | 780.0988  | 5.9857   | 19.2903 | 0.1004 | 0.1825 |
| A | 747.2763  | 41.3469  | 28.0336 | 0.2264 | 0.3692 |
| A | 740.1298  | 61.3800  | 5.2176  | 0.4417 | 0.6127 |
| A | 700.4874  | 111.4113 | 4.1547  | 0.2736 | 0.4297 |
| A | 654.8583  | 10.3711  | 1.0924  | 0.1802 | 0.3054 |
| A | 625.4823  | 30.9696  | 4.3742  | 0.5836 | 0.7371 |
| A | 591.9074  | 11.6318  | 8.6119  | 0.1815 | 0.3072 |
| A | 549.4505  | 4.1862   | 1.7004  | 0.4687 | 0.6383 |
| A | 478.4802  | 29.0296  | 3.8824  | 0.2644 | 0.4182 |
| A | 455.8113  | 1.9752   | 0.5471  | 0.7475 | 0.8555 |
| A | 450.9406  | 7.9754   | 2.0067  | 0.5173 | 0.6818 |
| A | 446.2754  | 8.4040   | 2.5405  | 0.6291 | 0.7724 |
| A | 436.6526  | 7.5848   | 3.0042  | 0.7236 | 0.8397 |
| A | 344.8137  | 1.9574   | 2.5329  | 0.5413 | 0.7024 |
| A | 325.5228  | 6.2007   | 11.9808 | 0.2320 | 0.3766 |
| A | 267.7389  | 1.4933   | 8.5088  | 0.2864 | 0.4453 |
| A | 255.0349  | 1.2755   | 4.1680  | 0.1605 | 0.2766 |
| A | 219.5974  | 1.8177   | 6.2670  | 0.2330 | 0.3780 |
| A | 190.4282  | 0.1024   | 2.8044  | 0.2956 | 0.4563 |
| A | 167.2142  | 0.1745   | 2.1911  | 0.4121 | 0.5837 |
| A | 155.3735  | 0.1611   | 1.4275  | 0.6892 | 0.8160 |
| A | 136.5448  | 0.5364   | 0.6110  | 0.7047 | 0.8268 |
| A | 120.0316  | 2.7318   | 0.1397  | 0.2940 | 0.4544 |
| A | 108.5563  | 0.3002   | 0.4865  | 0.3314 | 0.4978 |
| A | 88.6857   | 0.0685   | 0.0435  | 0.7225 | 0.8389 |
| A | 71.0934   | 0.3908   | 0.6514  | 0.7204 | 0.8375 |
| A | 60.7740   | 4.1327   | 0.7256  | 0.7412 | 0.8514 |
| A | 50.2569   | 4.9513   | 2.7795  | 0.7255 | 0.8409 |
| A | 16.9111   | 1.3231   | 0.8156  | 0.7420 | 0.8519 |

Processing aupcphexdienic6xprod6psd1pbetols.log  
PG=C01

Method BasisSet Imaginary Freqs  
RPBE1PBE GenECP 0

HF Energy  
-1017.8988083

|    | ZPE       | E298      | S298      | Squasihar | Equasihar | Strans | Srot   |
|----|-----------|-----------|-----------|-----------|-----------|--------|--------|
|    | 159.80536 | 169.936   | 131.967   | 127.502   | 169.968   | 43.828 | 33.437 |
| 31 |           |           |           |           |           |        |        |
| O  | 2.741147  | 0.046540  | -0.380321 |           |           |        |        |
| C  | 1.343815  | -0.425820 | -0.068537 |           |           |        |        |
| C  | 1.237306  | -1.749164 | 0.045714  |           |           |        |        |
| C  | 2.404340  | -2.687420 | -0.007244 |           |           |        |        |
| C  | 3.667211  | -1.992132 | 0.496614  |           |           |        |        |
| C  | 3.761109  | -0.657633 | -0.118540 |           |           |        |        |
| C  | 0.404944  | 0.710051  | 0.024728  |           |           |        |        |
| Au | -1.569006 | -0.038118 | -0.014792 |           |           |        |        |
| P  | -3.791480 | -0.715114 | -0.051976 |           |           |        |        |
| O  | 4.923296  | -0.167411 | -0.393759 |           |           |        |        |
| H  | 3.592746  | -1.810184 | 1.581057  |           |           |        |        |
| H  | 4.587741  | -2.549736 | 0.314025  |           |           |        |        |
| H  | 2.212443  | -3.564365 | 0.615867  |           |           |        |        |
| H  | 2.551002  | -3.058580 | -1.030992 |           |           |        |        |
| H  | -4.062933 | -2.096894 | -0.038570 |           |           |        |        |
| H  | -4.572370 | -0.319299 | -1.154827 |           |           |        |        |
| H  | -4.615376 | -0.288890 | 1.007239  |           |           |        |        |
| C  | 0.635956  | 1.763519  | -1.093291 |           |           |        |        |
| C  | 0.645845  | 1.551085  | 1.308543  |           |           |        |        |
| H  | 0.237900  | -2.148555 | 0.181120  |           |           |        |        |
| H  | 4.856718  | 0.730861  | -0.771819 |           |           |        |        |
| H  | 0.851309  | 0.931649  | 2.188468  |           |           |        |        |
| C  | 1.780461  | 2.530521  | 0.968784  |           |           |        |        |
| H  | -0.265277 | 2.120236  | 1.526204  |           |           |        |        |
| H  | 0.966005  | 1.306146  | -2.032434 |           |           |        |        |
| H  | -0.314339 | 2.259225  | -1.313197 |           |           |        |        |
| C  | 1.640979  | 2.807709  | -0.543009 |           |           |        |        |
| H  | 2.608376  | 2.738993  | -1.052174 |           |           |        |        |
| H  | 1.271283  | 3.821852  | -0.724629 |           |           |        |        |
| H  | 1.716022  | 3.445497  | 1.566099  |           |           |        |        |
| H  | 2.755059  | 2.082744  | 1.196843  |           |           |        |        |

WARNING: Geometry optimization converged in opt job, but not in freq job

Population analysis using the SCF density.

| Label | Frequencies | IR Inten | Raman Activ | Depolar (P) | Depolar (U) | Dipole |
|-------|-------------|----------|-------------|-------------|-------------|--------|
| A     | 3698.8927   | 240.8236 | 104.5336    | 0.2879      | 0.4471      | 6.9841 |
| A     | 3250.4038   | 8.0228   | 136.4427    | 0.2117      | 0.3494      |        |
| A     | 3180.8409   | 1.5212   | 197.9458    | 0.3646      | 0.5343      |        |
| A     | 3152.5726   | 0.6331   | 168.3059    | 0.4233      | 0.5948      |        |
| A     | 3142.0430   | 80.5819  | 166.2340    | 0.5992      | 0.7494      |        |
| A     | 3132.7472   | 19.7118  | 134.0710    | 0.7279      | 0.8425      |        |
| A     | 3123.8649   | 8.0105   | 180.4988    | 0.4579      | 0.6281      |        |
| A     | 3113.0123   | 14.9400  | 59.3596     | 0.3375      | 0.5046      |        |
| A     | 3091.0886   | 45.8681  | 430.8132    | 0.0244      | 0.0477      |        |
| A     | 3081.1352   | 56.1225  | 67.3844     | 0.3729      | 0.5432      |        |
| A     | 3075.2676   | 27.9356  | 89.4042     | 0.1155      | 0.2070      |        |
| A     | 3070.9008   | 31.4349  | 83.8260     | 0.5119      | 0.6772      |        |
| A     | 3068.9354   | 11.2970  | 199.7593    | 0.2419      | 0.3896      |        |
| A     | 3050.7515   | 11.1009  | 231.5460    | 0.0812      | 0.1501      |        |
| A     | 2533.7490   | 3.8807   | 225.9773    | 0.6904      | 0.8168      |        |
| A     | 2530.0231   | 4.1010   | 213.0852    | 0.7021      | 0.8250      |        |
| A     | 2514.7167   | 40.9391  | 728.7835    | 0.0563      | 0.1065      |        |
| A     | 1768.5101   | 100.6407 | 132.2112    | 0.2185      | 0.3586      |        |
| A     | 1633.3519   | 861.0579 | 20.5321     | 0.1434      | 0.2509      |        |
| A     | 1579.7164   | 136.9179 | 44.1990     | 0.1126      | 0.2025      |        |
| A     | 1507.8016   | 8.1041   | 7.5634      | 0.4827      | 0.6511      |        |
| A     | 1487.0866   | 10.4506  | 8.7185      | 0.7300      | 0.8439      |        |
| A     | 1479.3957   | 11.1321  | 11.9290     | 0.6563      | 0.7925      |        |
| A     | 1473.6497   | 3.5039   | 13.6652     | 0.7452      | 0.8540      |        |
| A     | 1467.2748   | 6.6185   | 31.6919     | 0.5872      | 0.7399      |        |
| A     | 1429.7345   | 44.3457  | 12.8209     | 0.7072      | 0.8285      |        |
| A     | 1371.7674   | 1.1749   | 7.1718      | 0.2877      | 0.4468      |        |
| A     | 1348.6650   | 1.1857   | 16.2421     | 0.4680      | 0.6376      |        |
| A     | 1338.5814   | 3.3225   | 10.5876     | 0.4727      | 0.6419      |        |
| A     | 1331.1132   | 4.0059   | 3.8451      | 0.5660      | 0.7229      |        |
| A     | 1319.3412   | 3.3967   | 10.4287     | 0.3367      | 0.5038      |        |
| A     | 1300.8179   | 0.4941   | 13.1047     | 0.5731      | 0.7286      |        |
| A     | 1286.7819   | 8.4589   | 6.6393      | 0.5503      | 0.7100      |        |
| A     | 1267.4840   | 18.8199  | 10.0792     | 0.5549      | 0.7137      |        |
| A     | 1245.9858   | 16.1401  | 6.0803      | 0.6018      | 0.7514      |        |
| A     | 1241.1491   | 47.9180  | 12.6634     | 0.5476      | 0.7076      |        |
| A     | 1233.9609   | 54.7551  | 9.1094      | 0.1408      | 0.2468      |        |
| A     | 1214.8146   | 3.0940   | 8.4790      | 0.4804      | 0.6490      |        |
| A     | 1202.0629   | 5.3754   | 21.3393     | 0.3520      | 0.5207      |        |
| A     | 1187.5586   | 15.4811  | 2.0260      | 0.7492      | 0.8566      |        |
| A     | 1130.3427   | 5.4951   | 26.8489     | 0.7498      | 0.8570      |        |
| A     | 1121.7983   | 6.8980   | 24.5064     | 0.7497      | 0.8570      |        |
| A     | 1108.9784   | 27.6156  | 15.7660     | 0.7349      | 0.8472      |        |
| A     | 1095.2129   | 11.2211  | 9.9424      | 0.6485      | 0.7868      |        |
| A     | 1071.0602   | 4.8765   | 31.4732     | 0.5057      | 0.6717      |        |

|   |           |          |         |        |        |
|---|-----------|----------|---------|--------|--------|
| A | 1055.4672 | 74.2836  | 5.6322  | 0.4279 | 0.5994 |
| A | 1045.1813 | 9.8782   | 3.9478  | 0.7413 | 0.8514 |
| A | 1040.4717 | 35.0160  | 2.5091  | 0.2755 | 0.4320 |
| A | 998.5810  | 227.2324 | 31.8879 | 0.7442 | 0.8533 |
| A | 981.1968  | 13.2565  | 39.6167 | 0.1654 | 0.2839 |
| A | 955.6216  | 9.5215   | 8.1789  | 0.6512 | 0.7887 |
| A | 948.7092  | 34.6135  | 17.2482 | 0.6220 | 0.7670 |
| A | 930.8989  | 7.4431   | 18.0616 | 0.3279 | 0.4939 |
| A | 910.2302  | 17.7774  | 39.3164 | 0.4328 | 0.6041 |
| A | 907.7383  | 1.4735   | 34.3186 | 0.1128 | 0.2028 |
| A | 849.9163  | 55.8566  | 12.3456 | 0.3026 | 0.4646 |
| A | 841.1029  | 14.5028  | 24.1952 | 0.1369 | 0.2409 |
| A | 827.5040  | 143.1226 | 10.6586 | 0.7499 | 0.8571 |
| A | 781.7382  | 9.4244   | 20.4753 | 0.0854 | 0.1574 |
| A | 760.5640  | 44.1241  | 20.8304 | 0.2397 | 0.3867 |
| A | 742.7979  | 102.9785 | 11.5188 | 0.6642 | 0.7982 |
| A | 703.8349  | 128.0019 | 5.4657  | 0.3474 | 0.5157 |
| A | 675.6917  | 15.5134  | 1.4689  | 0.4198 | 0.5914 |
| A | 630.6584  | 48.7913  | 8.4236  | 0.3528 | 0.5216 |
| A | 610.0039  | 8.8241   | 6.6280  | 0.1759 | 0.2991 |
| A | 565.6708  | 5.7418   | 1.7166  | 0.7107 | 0.8309 |
| A | 491.1268  | 0.1954   | 0.2801  | 0.7233 | 0.8394 |
| A | 476.3806  | 34.1134  | 10.3630 | 0.2364 | 0.3824 |
| A | 469.4101  | 17.2812  | 6.9002  | 0.3143 | 0.4782 |
| A | 454.3819  | 5.5610   | 3.7139  | 0.7452 | 0.8540 |
| A | 444.5047  | 37.2448  | 20.2543 | 0.5970 | 0.7477 |
| A | 329.3039  | 2.9164   | 10.2975 | 0.1929 | 0.3234 |
| A | 321.1899  | 1.4714   | 3.7938  | 0.7019 | 0.8249 |
| A | 299.6562  | 0.1531   | 12.9836 | 0.1926 | 0.3229 |
| A | 238.2904  | 0.7596   | 0.9048  | 0.2975 | 0.4586 |
| A | 225.7493  | 2.3882   | 8.5773  | 0.4105 | 0.5821 |
| A | 182.3423  | 0.9443   | 6.1994  | 0.2845 | 0.4430 |
| A | 174.7900  | 0.4224   | 0.4471  | 0.6424 | 0.7822 |
| A | 161.2053  | 1.2372   | 0.5163  | 0.6876 | 0.8149 |
| A | 143.2262  | 0.9939   | 0.5981  | 0.7474 | 0.8554 |
| A | 117.4148  | 1.1358   | 0.2410  | 0.7378 | 0.8491 |
| A | 110.1225  | 0.5482   | 0.9815  | 0.7388 | 0.8498 |
| A | 88.4460   | 0.4117   | 0.4446  | 0.7131 | 0.8325 |
| A | 73.7669   | 4.1187   | 0.5402  | 0.7363 | 0.8481 |
| A | 68.4118   | 5.8724   | 1.7214  | 0.7136 | 0.8329 |
| A | 56.1995   | 1.6102   | 0.4186  | 0.7291 | 0.8434 |
| A | 41.0378   | 0.6484   | 1.0098  | 0.7249 | 0.8405 |

7-endo-trig prod for 4,5-Au-PH3 complex of 6,6-cyclopentano-hexa-4,5-dienoic acid:

Processing aupcphexdienic7prod-b6psdm6.log

PG=C01

|        |          |                 |
|--------|----------|-----------------|
| Method | BasisSet | Imaginary Freqs |
| RM06   | GenECP   | 0               |

HF Energy  
-1018.2476281

|           |         |         |           |           |        |        |
|-----------|---------|---------|-----------|-----------|--------|--------|
| ZPE       | E298    | S298    | Squasihar | Equasihar | Strans | Srot   |
| 158.22971 | 168.699 | 136.116 | 129.568   | 168.740   | 43.828 | 33.466 |

31

|    |           |           |           |
|----|-----------|-----------|-----------|
| C  | 1.856357  | 2.903799  | -0.507466 |
| C  | 0.991213  | 1.722009  | -0.953676 |
| C  | 1.313545  | 0.591923  | 0.011178  |
| C  | 1.539184  | 1.299494  | 1.336498  |
| C  | 2.144968  | 2.669426  | 0.993708  |
| O  | 2.850077  | 0.294845  | -0.532818 |
| C  | 3.608853  | -0.633112 | -0.171434 |
| O  | 4.797288  | -0.691439 | -0.701211 |
| C  | 0.458114  | -0.613359 | -0.020492 |
| Au | -1.598774 | -0.200066 | -0.027839 |
| P  | -3.943311 | 0.144214  | -0.025198 |
| C  | 0.807491  | -1.911446 | 0.005052  |
| C  | 2.151260  | -2.577260 | 0.110858  |
| C  | 3.255058  | -1.726070 | 0.752059  |
| H  | -4.664658 | -0.270941 | 1.109008  |
| H  | -4.688133 | -0.483878 | -1.039964 |
| H  | -4.413969 | 1.464130  | -0.151073 |
| H  | -0.002848 | -2.640127 | -0.043838 |
| H  | 2.042058  | -3.474437 | 0.731783  |
| H  | 2.486474  | -2.948528 | -0.869836 |
| H  | 2.887247  | -1.301239 | 1.694068  |
| H  | 4.152033  | -2.316188 | 0.956033  |
| H  | 2.124226  | 0.707124  | 2.049494  |
| H  | 0.541075  | 1.402393  | 1.783204  |
| H  | 1.119404  | 1.417857  | -1.998387 |
| H  | -0.074310 | 1.946461  | -0.815718 |
| H  | 3.223181  | 2.679406  | 1.189168  |
| H  | 1.713780  | 3.452680  | 1.624185  |
| H  | 2.789590  | 2.936496  | -1.080163 |
| H  | 1.349262  | 3.855729  | -0.689590 |
| H  | 4.933207  | 0.035378  | -1.336580 |

Population analysis using the SCF density.

|       |             |          |             |             |             |        |
|-------|-------------|----------|-------------|-------------|-------------|--------|
| Label | Frequencies | IR Inten | Raman Activ | Depolar (P) | Depolar (U) | Dipole |
| A     | 3748.9680   | 197.9805 | 84.0286     | 0.2282      | 0.3716      | 3.1514 |
| A     | 3148.9925   | 0.0944   | 90.8332     | 0.4511      | 0.6217      |        |



|   |           |          |          |        |        |
|---|-----------|----------|----------|--------|--------|
| A | 3143.7679 | 2.6457   | 71.6268  | 0.2145 | 0.3533 |
| A | 3132.7360 | 22.8966  | 82.6129  | 0.6170 | 0.7632 |
| A | 3119.8959 | 3.1435   | 72.6092  | 0.6796 | 0.8092 |
| A | 3115.1775 | 3.6369   | 68.9633  | 0.4606 | 0.6307 |
| A | 3106.9556 | 12.4206  | 24.3689  | 0.3268 | 0.4926 |
| A | 3089.8463 | 1.5221   | 126.4282 | 0.4120 | 0.5836 |
| A | 3073.4128 | 31.0189  | 206.2839 | 0.0489 | 0.0933 |
| A | 3070.0056 | 1.3156   | 62.0816  | 0.1573 | 0.2718 |
| A | 3064.6852 | 15.2955  | 72.7232  | 0.3278 | 0.4937 |
| A | 3057.7266 | 23.2554  | 132.4923 | 0.0638 | 0.1199 |
| A | 3053.8529 | 5.7836   | 3.6807   | 0.3545 | 0.5235 |
| A | 3022.8716 | 15.0326  | 233.1630 | 0.1400 | 0.2456 |
| A | 2525.7695 | 5.4487   | 137.1007 | 0.7065 | 0.8280 |
| A | 2521.8496 | 5.8235   | 140.5667 | 0.6760 | 0.8067 |
| A | 2505.0386 | 37.1654  | 477.6493 | 0.0665 | 0.1248 |
| A | 1703.5308 | 22.5297  | 54.0030  | 0.1108 | 0.1994 |
| A | 1681.8315 | 649.1911 | 3.4111   | 0.2519 | 0.4025 |
| A | 1540.8723 | 198.6817 | 3.5768   | 0.1228 | 0.2187 |
| A | 1492.6571 | 10.0304  | 3.9529   | 0.5152 | 0.6800 |
| A | 1469.0354 | 8.9665   | 8.7633   | 0.7462 | 0.8547 |
| A | 1448.2847 | 15.1438  | 26.2630  | 0.6208 | 0.7661 |
| A | 1443.3927 | 1.8090   | 6.2777   | 0.7499 | 0.8571 |
| A | 1433.1924 | 29.7166  | 2.3483   | 0.7187 | 0.8363 |
| A | 1426.2893 | 12.6405  | 5.9488   | 0.7433 | 0.8528 |
| A | 1378.3606 | 38.4531  | 20.5501  | 0.1635 | 0.2810 |
| A | 1352.7366 | 3.8337   | 1.7624   | 0.4499 | 0.6206 |
| A | 1347.7307 | 3.4765   | 4.4596   | 0.2584 | 0.4107 |
| A | 1326.8044 | 0.9043   | 0.8305   | 0.6487 | 0.7869 |
| A | 1307.6035 | 1.4815   | 2.4749   | 0.4876 | 0.6556 |
| A | 1302.4116 | 5.4604   | 5.8671   | 0.7190 | 0.8365 |
| A | 1293.0905 | 8.6037   | 2.0375   | 0.7373 | 0.8488 |
| A | 1249.6978 | 4.4804   | 4.5484   | 0.5844 | 0.7377 |
| A | 1241.5627 | 16.9759  | 2.8898   | 0.7500 | 0.8571 |
| A | 1235.7668 | 19.0336  | 5.6332   | 0.7434 | 0.8528 |
| A | 1225.8947 | 117.9233 | 1.7882   | 0.7334 | 0.8462 |
| A | 1202.3157 | 4.1250   | 3.9027   | 0.6926 | 0.8184 |
| A | 1170.8695 | 27.6160  | 7.0089   | 0.2443 | 0.3927 |
| A | 1165.9930 | 5.6930   | 2.9272   | 0.5667 | 0.7234 |
| A | 1154.3562 | 47.1057  | 4.5651   | 0.6455 | 0.7845 |
| A | 1131.4647 | 6.0003   | 8.1094   | 0.1911 | 0.3209 |
| A | 1127.4906 | 3.1472   | 18.5757  | 0.6852 | 0.8132 |
| A | 1126.0005 | 3.5314   | 16.9606  | 0.7449 | 0.8538 |
| A | 1072.1555 | 4.8150   | 4.1055   | 0.7454 | 0.8541 |
| A | 1052.1126 | 13.5893  | 11.9953  | 0.4944 | 0.6617 |
| A | 1019.6103 | 1.4446   | 2.3401   | 0.3094 | 0.4726 |
| A | 1014.0099 | 12.6186  | 2.8509   | 0.4848 | 0.6530 |
| A | 1010.2380 | 179.4998 | 18.0325  | 0.7176 | 0.8356 |

|   |          |         |         |        |        |
|---|----------|---------|---------|--------|--------|
| A | 982.5342 | 3.0791  | 9.1002  | 0.2497 | 0.3996 |
| A | 968.8679 | 6.8555  | 1.0048  | 0.6981 | 0.8222 |
| A | 940.5442 | 34.6487 | 4.1378  | 0.3411 | 0.5087 |
| A | 921.5467 | 48.1175 | 12.4631 | 0.4256 | 0.5971 |
| A | 899.7494 | 1.4407  | 6.4875  | 0.0417 | 0.0800 |
| A | 870.2193 | 3.7365  | 8.0456  | 0.7499 | 0.8571 |
| A | 848.3204 | 26.6041 | 2.6492  | 0.4398 | 0.6109 |
| A | 828.7485 | 22.9681 | 2.4006  | 0.4578 | 0.6281 |
| A | 804.9187 | 16.3775 | 12.1260 | 0.0906 | 0.1662 |
| A | 776.1998 | 10.4225 | 2.3570  | 0.0577 | 0.1092 |
| A | 758.3985 | 70.5130 | 1.2647  | 0.4461 | 0.6170 |
| A | 721.1323 | 44.4571 | 1.7422  | 0.0103 | 0.0204 |
| A | 680.2787 | 67.2002 | 1.5588  | 0.6328 | 0.7751 |
| A | 652.0195 | 8.3515  | 0.9637  | 0.4161 | 0.5877 |
| A | 616.5012 | 79.5530 | 8.8258  | 0.1270 | 0.2254 |
| A | 580.4871 | 8.5477  | 1.2066  | 0.3228 | 0.4881 |
| A | 549.2295 | 2.3615  | 2.2848  | 0.0793 | 0.1470 |
| A | 478.8542 | 29.2278 | 4.5946  | 0.1364 | 0.2401 |
| A | 467.4582 | 0.8241  | 0.2939  | 0.5706 | 0.7266 |
| A | 450.4071 | 0.9523  | 0.2430  | 0.1003 | 0.1824 |
| A | 412.0216 | 40.9555 | 7.9576  | 0.1341 | 0.2365 |
| A | 368.3036 | 11.2969 | 2.2280  | 0.4059 | 0.5774 |
| A | 335.6921 | 2.1161  | 1.7774  | 0.7426 | 0.8523 |
| A | 302.1753 | 4.7367  | 1.7824  | 0.2626 | 0.4160 |
| A | 274.8568 | 1.8410  | 10.8829 | 0.1987 | 0.3316 |
| A | 241.1954 | 5.0595  | 2.9454  | 0.1871 | 0.3153 |
| A | 216.0080 | 56.6133 | 8.3795  | 0.4517 | 0.6223 |
| A | 172.8373 | 11.6229 | 3.4783  | 0.4697 | 0.6391 |
| A | 166.6525 | 2.3824  | 1.1766  | 0.3160 | 0.4802 |
| A | 144.8816 | 3.6685  | 1.7368  | 0.5275 | 0.6906 |
| A | 120.3400 | 7.2958  | 3.4188  | 0.3135 | 0.4773 |
| A | 113.8896 | 37.6982 | 9.8104  | 0.2460 | 0.3948 |
| A | 100.3164 | 1.3057  | 1.4442  | 0.5431 | 0.7039 |
| A | 65.8819  | 2.4883  | 0.4808  | 0.7083 | 0.8292 |
| A | 62.8840  | 2.4139  | 0.3069  | 0.4678 | 0.6374 |
| A | 57.6626  | 3.6183  | 1.1000  | 0.5652 | 0.7222 |
| A | 55.1139  | 2.8232  | 1.9602  | 0.7062 | 0.8278 |
| A | 27.2486  | 2.0264  | 0.7599  | 0.6816 | 0.8107 |

Processing aupcphexdnic7prod-b6psd1pbetols.log  
PG=C01

Method BasisSet Imaginary Freqs  
RPBE1PBE GenECP 0

HF Energy

-1017.9102590

|    | ZPE       | E298      | S298      | Squasihar | Equasihar | Strans | Srot   |
|----|-----------|-----------|-----------|-----------|-----------|--------|--------|
|    | 160.35483 | 170.462   | 132.667   | 127.023   | 170.497   | 43.828 | 33.425 |
| 31 |           |           |           |           |           |        |        |
| C  | 2.079399  | 2.672935  | 0.980375  |           |           |        |        |
| C  | 1.819331  | 2.900529  | -0.528671 |           |           |        |        |
| C  | 0.981454  | 1.702596  | -0.990397 |           |           |        |        |
| C  | 1.320734  | 0.568954  | -0.023396 |           |           |        |        |
| C  | 1.490595  | 1.290404  | 1.312489  |           |           |        |        |
| O  | 2.815183  | 0.296569  | -0.509892 |           |           |        |        |
| C  | 3.587116  | -0.613479 | -0.112616 |           |           |        |        |
| C  | 3.218058  | -1.746167 | 0.752359  |           |           |        |        |
| C  | 2.149518  | -2.584024 | 0.034117  |           |           |        |        |
| C  | 0.797075  | -1.931877 | -0.066747 |           |           |        |        |
| C  | 0.439501  | -0.633113 | -0.064378 |           |           |        |        |
| Au | -1.587846 | -0.211357 | -0.032997 |           |           |        |        |
| P  | -3.874990 | 0.179916  | 0.028722  |           |           |        |        |
| O  | 4.804699  | -0.594900 | -0.565211 |           |           |        |        |
| H  | -4.580871 | -0.265262 | 1.162268  |           |           |        |        |
| H  | -4.657213 | -0.382066 | -0.997638 |           |           |        |        |
| H  | -4.302099 | 1.519944  | -0.027378 |           |           |        |        |
| H  | -0.007654 | -2.663064 | -0.127549 |           |           |        |        |
| H  | 2.042159  | -3.511488 | 0.606389  |           |           |        |        |
| H  | 2.518591  | -2.889967 | -0.955576 |           |           |        |        |
| H  | 2.809649  | -1.363455 | 1.694038  |           |           |        |        |
| H  | 4.115395  | -2.330494 | 0.962603  |           |           |        |        |
| H  | 2.074730  | 0.717071  | 2.038088  |           |           |        |        |
| H  | 0.480669  | 1.377640  | 1.727591  |           |           |        |        |
| H  | 1.133711  | 1.410806  | -2.033647 |           |           |        |        |
| H  | -0.086880 | 1.903940  | -0.862020 |           |           |        |        |
| H  | 3.151335  | 2.703439  | 1.198769  |           |           |        |        |
| H  | 1.614058  | 3.446067  | 1.597768  |           |           |        |        |
| H  | 2.763167  | 2.947060  | -1.080337 |           |           |        |        |
| H  | 1.296737  | 3.841362  | -0.721441 |           |           |        |        |
| H  | 4.943461  | 0.163023  | -1.163956 |           |           |        |        |

Population analysis using the SCF density.

| Label | Frequencies | IR Inten | Raman Activ | Depolar (P) | Depolar (U) | Dipole |
|-------|-------------|----------|-------------|-------------|-------------|--------|
| A     | 3713.1358   | 226.8465 | 123.6515    | 0.2287      | 0.3723      | 3.6556 |
| A     | 3188.1051   | 0.5758   | 160.0018    | 0.4252      | 0.5967      |        |
| A     | 3182.4911   | 3.8960   | 133.7956    | 0.2410      | 0.3884      |        |
| A     | 3162.1158   | 38.9084  | 83.7137     | 0.7374      | 0.8489      |        |
| A     | 3155.5157   | 12.5450  | 89.7758     | 0.7419      | 0.8519      |        |
| A     | 3148.6378   | 3.3534   | 220.2070    | 0.4720      | 0.6413      |        |
| A     | 3135.4567   | 7.0650   | 36.6880     | 0.7500      | 0.8571      |        |
| A     | 3121.0129   | 1.3316   | 194.7586    | 0.4381      | 0.6092      |        |

S298

|   |           |          |          |        |        |
|---|-----------|----------|----------|--------|--------|
| A | 3105.0366 | 17.3054  | 577.0052 | 0.0271 | 0.0528 |
| A | 3101.8994 | 1.5304   | 87.3583  | 0.2477 | 0.3970 |
| A | 3098.6551 | 48.9078  | 42.2895  | 0.4220 | 0.5935 |
| A | 3095.8907 | 10.0346  | 47.3551  | 0.1183 | 0.2116 |
| A | 3092.2745 | 20.2149  | 68.8297  | 0.7475 | 0.8555 |
| A | 3062.8642 | 14.7529  | 401.1506 | 0.1353 | 0.2383 |
| A | 2536.7229 | 3.0411   | 204.2229 | 0.7497 | 0.8569 |
| A | 2535.6910 | 3.0074   | 226.5126 | 0.7477 | 0.8556 |
| A | 2519.5760 | 36.3602  | 720.5599 | 0.0504 | 0.0960 |
| A | 1702.0098 | 5.1404   | 99.9269  | 0.1101 | 0.1984 |
| A | 1664.5627 | 786.6470 | 12.3993  | 0.1213 | 0.2163 |
| A | 1558.4156 | 238.4004 | 5.3524   | 0.0814 | 0.1505 |
| A | 1513.5668 | 8.5334   | 5.3987   | 0.6224 | 0.7673 |
| A | 1489.8099 | 9.3578   | 13.4066  | 0.7329 | 0.8458 |
| A | 1476.3818 | 19.7177  | 32.7393  | 0.6702 | 0.8025 |
| A | 1469.8562 | 1.7693   | 15.5882  | 0.6620 | 0.7966 |
| A | 1463.5541 | 26.3968  | 8.6320   | 0.6823 | 0.8112 |
| A | 1456.1551 | 16.5166  | 10.0080  | 0.7291 | 0.8433 |
| A | 1383.7488 | 35.2920  | 36.3413  | 0.1821 | 0.3082 |
| A | 1367.4806 | 8.8403   | 1.4863   | 0.7491 | 0.8566 |
| A | 1364.6103 | 1.0674   | 8.0746   | 0.2603 | 0.4131 |
| A | 1344.4555 | 2.7456   | 0.8279   | 0.6816 | 0.8107 |
| A | 1324.3087 | 1.1444   | 3.7234   | 0.6607 | 0.7957 |
| A | 1321.4919 | 8.2373   | 11.6510  | 0.7169 | 0.8351 |
| A | 1307.3799 | 9.7886   | 2.5681   | 0.7275 | 0.8422 |
| A | 1264.6886 | 4.8124   | 11.9133  | 0.6514 | 0.7889 |
| A | 1257.1828 | 45.2000  | 5.9567   | 0.7456 | 0.8543 |
| A | 1251.9546 | 32.1878  | 3.9306   | 0.6985 | 0.8225 |
| A | 1247.5788 | 101.8834 | 4.1912   | 0.5812 | 0.7352 |
| A | 1222.2359 | 9.0563   | 7.7007   | 0.7015 | 0.8246 |
| A | 1188.4092 | 51.1409  | 14.0923  | 0.3874 | 0.5585 |
| A | 1172.9384 | 16.8833  | 1.4318   | 0.5564 | 0.7150 |
| A | 1166.2954 | 32.7878  | 4.9533   | 0.7396 | 0.8503 |
| A | 1136.9301 | 1.5552   | 7.2530   | 0.1699 | 0.2905 |
| A | 1126.4217 | 4.6858   | 27.1820  | 0.7191 | 0.8366 |
| A | 1125.4554 | 5.4524   | 27.9988  | 0.7493 | 0.8567 |
| A | 1082.6142 | 6.1335   | 6.0153   | 0.7498 | 0.8570 |
| A | 1060.9722 | 18.6727  | 18.2567  | 0.4955 | 0.6626 |
| A | 1035.1039 | 0.8178   | 3.3921   | 0.4244 | 0.5959 |
| A | 1028.7335 | 1.7687   | 6.2827   | 0.4928 | 0.6602 |
| A | 1001.0856 | 193.3816 | 26.5391  | 0.7499 | 0.8571 |
| A | 998.3888  | 26.7674  | 19.2799  | 0.4257 | 0.5971 |
| A | 982.0624  | 12.7219  | 1.1684   | 0.7225 | 0.8389 |
| A | 958.1284  | 68.7706  | 5.9454   | 0.5238 | 0.6875 |
| A | 941.2165  | 49.6363  | 12.6658  | 0.4200 | 0.5916 |
| A | 913.2571  | 1.1193   | 9.8877   | 0.0345 | 0.0667 |
| A | 884.6732  | 7.8452   | 13.8750  | 0.7286 | 0.8430 |

|   |          |         |         |        |        |
|---|----------|---------|---------|--------|--------|
| A | 864.5684 | 29.5342 | 1.8830  | 0.2808 | 0.4385 |
| A | 840.4753 | 13.2090 | 3.8776  | 0.2929 | 0.4531 |
| A | 820.8466 | 29.8670 | 12.3015 | 0.0495 | 0.0943 |
| A | 791.7871 | 8.9636  | 2.2694  | 0.0637 | 0.1197 |
| A | 758.7452 | 69.4802 | 1.4868  | 0.4178 | 0.5893 |
| A | 742.1321 | 87.4709 | 1.4416  | 0.2159 | 0.3551 |
| A | 690.9433 | 82.9258 | 5.5545  | 0.2710 | 0.4264 |
| A | 661.8370 | 14.6875 | 1.8047  | 0.3402 | 0.5076 |
| A | 631.8248 | 70.8262 | 11.4812 | 0.1074 | 0.1940 |
| A | 596.8602 | 14.1069 | 1.7899  | 0.2556 | 0.4071 |
| A | 558.3172 | 11.0718 | 2.0773  | 0.1122 | 0.2017 |
| A | 502.5715 | 34.2476 | 10.2957 | 0.1199 | 0.2141 |
| A | 491.0694 | 11.0368 | 0.9039  | 0.2705 | 0.4258 |
| A | 479.6009 | 4.9243  | 1.4173  | 0.0897 | 0.1646 |
| A | 432.8378 | 50.9109 | 11.2224 | 0.2321 | 0.3767 |
| A | 390.2045 | 6.0624  | 4.9622  | 0.5293 | 0.6922 |
| A | 357.4985 | 3.8713  | 3.5509  | 0.7062 | 0.8278 |
| A | 322.0647 | 6.6169  | 6.1151  | 0.1427 | 0.2498 |
| A | 303.8541 | 3.6697  | 12.9717 | 0.1826 | 0.3088 |
| A | 277.2628 | 22.1998 | 9.7203  | 0.5288 | 0.6918 |
| A | 253.3998 | 3.7233  | 2.1402  | 0.3295 | 0.4957 |
| A | 190.2110 | 2.6458  | 2.7415  | 0.5392 | 0.7006 |
| A | 167.6933 | 2.2842  | 0.6211  | 0.5268 | 0.6901 |
| A | 163.8334 | 1.6370  | 2.4379  | 0.4699 | 0.6393 |
| A | 144.5438 | 1.0500  | 1.5987  | 0.2584 | 0.4107 |
| A | 124.2803 | 0.8017  | 1.0076  | 0.6682 | 0.8011 |
| A | 101.6195 | 1.6302  | 0.5830  | 0.7431 | 0.8526 |
| A | 76.6488  | 1.3952  | 0.6186  | 0.6934 | 0.8190 |
| A | 74.3733  | 0.8754  | 0.3932  | 0.7460 | 0.8546 |
| A | 72.7095  | 1.1736  | 0.7550  | 0.7016 | 0.8247 |
| A | 46.7008  | 5.0189  | 0.5525  | 0.7495 | 0.8568 |
| A | 29.3237  | 6.1568  | 1.4810  | 0.7493 | 0.8567 |

Less stable conformer of 7-endo-trig prod for 4,5-Au-PH3 complex of 6,6-cyclopentano-hexa-4,5-dienoic acid:

Processing aupcphexdienic7prod6psdm6.log  
PG=C01

Method      BasisSet      Imaginary Freqs  
RM06      GenECP      0

HF Energy  
-1018.2449703

ZPE      E298      S298      Squasihar      Equasihar      Strans      Srot

S300

158.72063 168.975 133.446 127.846 169.009 43.828 33.276

31

|    |           |           |           |
|----|-----------|-----------|-----------|
| C  | 0.428238  | 2.479738  | 1.274142  |
| C  | 1.667737  | 1.581805  | 1.198881  |
| C  | 1.440852  | 0.778326  | -0.082699 |
| C  | 0.875986  | 1.811384  | -1.055783 |
| C  | 0.010303  | 2.742247  | -0.189927 |
| C  | 0.660948  | -0.482527 | 0.065605  |
| Au | -1.425559 | -0.322719 | -0.045429 |
| P  | -3.793402 | -0.285090 | -0.157665 |
| C  | 1.138738  | -1.717332 | 0.309098  |
| C  | 2.540028  | -2.227405 | 0.506080  |
| C  | 3.598338  | -1.168531 | 0.845391  |
| C  | 3.750375  | -0.275682 | -0.314756 |
| O  | 4.864293  | -0.362914 | -0.977893 |
| O  | 2.872667  | 0.511247  | -0.748994 |
| H  | 3.274214  | -0.579766 | 1.711375  |
| H  | 4.565523  | -1.625725 | 1.068366  |
| H  | 2.531790  | -2.943677 | 1.336921  |
| H  | 2.866826  | -2.809976 | -0.368962 |
| H  | -4.420967 | 0.946975  | -0.419254 |
| H  | -4.406772 | -1.087638 | -1.136858 |
| H  | -4.510992 | -0.691315 | 0.982329  |
| H  | 0.408361  | -2.523880 | 0.389094  |
| H  | 4.858060  | 0.221999  | -1.758395 |
| H  | 0.337025  | 1.340307  | -1.884500 |
| H  | 1.718071  | 2.371756  | -1.479300 |
| H  | 1.787583  | 0.956703  | 2.089824  |
| H  | 2.570793  | 2.195824  | 1.069913  |
| H  | 0.165837  | 3.786447  | -0.479193 |
| H  | -1.057505 | 2.537024  | -0.331133 |
| H  | -0.370678 | 1.957747  | 1.814480  |
| H  | 0.638055  | 3.399549  | 1.828047  |

WARNING: Geometry optimization converged in opt job, but not in freq job

Population analysis using the SCF density.

| Label | Frequencies | IR Inten | Raman Activ | Depolar (P) | Depolar (U) | Dipole |
|-------|-------------|----------|-------------|-------------|-------------|--------|
| A     | 3742.1045   | 219.8256 | 88.4981     | 0.2389      | 0.3857      | 3.9464 |
| A     | 3152.5995   | 0.0537   | 82.5208     | 0.4886      | 0.6564      |        |
| A     | 3142.3475   | 2.8866   | 64.0216     | 0.2125      | 0.3505      |        |
| A     | 3128.9723   | 37.8303  | 77.2639     | 0.5328      | 0.6952      |        |
| A     | 3123.5975   | 3.1957   | 76.7353     | 0.6226      | 0.7674      |        |
| A     | 3118.0911   | 5.3819   | 87.5320     | 0.2917      | 0.4517      |        |
| A     | 3108.5367   | 6.3124   | 35.3923     | 0.7299      | 0.8438      |        |
| A     | 3087.0085   | 0.8782   | 134.3243    | 0.3084      | 0.4714      |        |
| A     | 3076.9169   | 1.9652   | 64.4666     | 0.3416      | 0.5092      |        |

S301

|   |           |          |          |        |        |
|---|-----------|----------|----------|--------|--------|
| A | 3063.3087 | 16.5546  | 305.2784 | 0.0486 | 0.0926 |
| A | 3060.0415 | 24.1260  | 29.0324  | 0.4612 | 0.6312 |
| A | 3056.2938 | 9.7056   | 28.7655  | 0.7494 | 0.8568 |
| A | 3036.9453 | 15.0484  | 81.3219  | 0.1304 | 0.2307 |
| A | 3023.0207 | 15.0681  | 236.6651 | 0.1412 | 0.2474 |
| A | 2524.0441 | 5.4542   | 127.3486 | 0.7391 | 0.8500 |
| A | 2522.3513 | 5.3002   | 132.9123 | 0.7425 | 0.8522 |
| A | 2505.4873 | 38.5598  | 471.9944 | 0.0621 | 0.1170 |
| A | 1688.1287 | 44.4640  | 48.8687  | 0.1138 | 0.2043 |
| A | 1667.9003 | 637.0615 | 3.0105   | 0.4165 | 0.5881 |
| A | 1553.5383 | 205.5658 | 3.8893   | 0.1476 | 0.2572 |
| A | 1484.7717 | 12.4410  | 5.4170   | 0.7449 | 0.8538 |
| A | 1462.2063 | 16.9668  | 3.2575   | 0.7353 | 0.8475 |
| A | 1456.9303 | 2.7174   | 3.2209   | 0.7468 | 0.8551 |
| A | 1447.0669 | 10.2061  | 24.1573  | 0.6417 | 0.7818 |
| A | 1444.1981 | 7.0887   | 6.8034   | 0.6797 | 0.8093 |
| A | 1435.1377 | 30.2777  | 7.2292   | 0.6733 | 0.8048 |
| A | 1375.5145 | 33.3601  | 19.9743  | 0.2537 | 0.4047 |
| A | 1350.9902 | 11.6322  | 1.6901   | 0.7471 | 0.8552 |
| A | 1345.9523 | 0.6108   | 3.9950   | 0.2865 | 0.4454 |
| A | 1327.7120 | 3.4792   | 0.8846   | 0.7288 | 0.8431 |
| A | 1313.7076 | 9.7668   | 3.3775   | 0.7342 | 0.8468 |
| A | 1306.9147 | 6.3488   | 3.2707   | 0.4811 | 0.6497 |
| A | 1295.7815 | 1.4888   | 1.6171   | 0.7500 | 0.8571 |
| A | 1275.3146 | 14.0624  | 3.5457   | 0.7406 | 0.8509 |
| A | 1243.7312 | 11.1379  | 3.9653   | 0.7315 | 0.8449 |
| A | 1230.6236 | 30.5087  | 5.1079   | 0.7452 | 0.8540 |
| A | 1225.0753 | 87.2171  | 4.2802   | 0.6972 | 0.8216 |
| A | 1224.5002 | 17.8480  | 1.9406   | 0.0959 | 0.1750 |
| A | 1197.4224 | 6.8802   | 4.4462   | 0.5129 | 0.6781 |
| A | 1170.0333 | 5.0880   | 3.1268   | 0.4342 | 0.6055 |
| A | 1155.5077 | 30.8823  | 1.7346   | 0.7172 | 0.8353 |
| A | 1129.5470 | 3.1527   | 16.0746  | 0.7457 | 0.8544 |
| A | 1126.8532 | 3.5588   | 16.3084  | 0.7500 | 0.8571 |
| A | 1095.1545 | 0.9674   | 4.5146   | 0.2436 | 0.3918 |
| A | 1077.8988 | 2.3430   | 6.6072   | 0.6707 | 0.8029 |
| A | 1048.2787 | 6.4633   | 2.4538   | 0.2474 | 0.3967 |
| A | 1034.4454 | 4.2342   | 2.3328   | 0.1388 | 0.2438 |
| A | 1013.0811 | 93.0239  | 8.8764   | 0.7473 | 0.8554 |
| A | 1011.4403 | 81.4403  | 10.1977  | 0.6441 | 0.7835 |
| A | 988.8041  | 7.6838   | 2.4240   | 0.3708 | 0.5410 |
| A | 982.5226  | 6.0386   | 9.2211   | 0.2348 | 0.3803 |
| A | 947.2165  | 25.9090  | 1.4412   | 0.3886 | 0.5597 |
| A | 925.8901  | 63.9814  | 12.3512  | 0.7243 | 0.8401 |
| A | 908.4366  | 0.0510   | 9.8767   | 0.0208 | 0.0408 |
| A | 866.6639  | 4.2591   | 11.8723  | 0.3583 | 0.5276 |
| A | 848.7593  | 29.3998  | 3.4609   | 0.4822 | 0.6506 |

|   |          |          |        |        |        |
|---|----------|----------|--------|--------|--------|
| A | 834.3369 | 32.7292  | 0.4847 | 0.7063 | 0.8278 |
| A | 802.3960 | 10.1832  | 1.6377 | 0.2681 | 0.4228 |
| A | 782.8758 | 12.9971  | 4.3437 | 0.0582 | 0.1100 |
| A | 755.2069 | 59.1881  | 2.2701 | 0.5179 | 0.6824 |
| A | 703.7637 | 3.7478   | 5.7085 | 0.0147 | 0.0289 |
| A | 685.0706 | 63.6342  | 2.1193 | 0.4414 | 0.6125 |
| A | 675.6028 | 188.7814 | 2.3678 | 0.5175 | 0.6821 |
| A | 632.7105 | 18.8466  | 1.6339 | 0.2409 | 0.3882 |
| A | 611.7066 | 13.6523  | 6.3201 | 0.0220 | 0.0430 |
| A | 561.2078 | 12.6290  | 1.2941 | 0.7430 | 0.8526 |
| A | 500.0645 | 3.5483   | 0.6862 | 0.4091 | 0.5807 |
| A | 463.3564 | 1.5209   | 0.8817 | 0.2095 | 0.3464 |
| A | 455.8067 | 3.0302   | 0.0395 | 0.7461 | 0.8546 |
| A | 441.3740 | 10.2026  | 0.8946 | 0.5989 | 0.7491 |
| A | 371.9319 | 1.5130   | 4.4298 | 0.2107 | 0.3481 |
| A | 322.2052 | 0.7908   | 1.8431 | 0.7485 | 0.8561 |
| A | 306.6909 | 10.7782  | 4.6523 | 0.1670 | 0.2863 |
| A | 273.6870 | 1.0724   | 9.1981 | 0.1834 | 0.3100 |
| A | 251.1765 | 1.3768   | 2.5149 | 0.1946 | 0.3258 |
| A | 247.5583 | 26.8698  | 6.9056 | 0.3175 | 0.4819 |
| A | 187.3584 | 4.1567   | 2.0811 | 0.3980 | 0.5694 |
| A | 171.7087 | 1.4931   | 0.5708 | 0.3060 | 0.4686 |
| A | 155.4980 | 1.7314   | 2.6781 | 0.2050 | 0.3403 |
| A | 149.3043 | 0.1833   | 0.6053 | 0.5742 | 0.7295 |
| A | 118.7515 | 0.6927   | 0.6537 | 0.7381 | 0.8493 |
| A | 105.7620 | 0.3605   | 0.2048 | 0.7373 | 0.8488 |
| A | 91.3810  | 1.6226   | 1.0191 | 0.7500 | 0.8571 |
| A | 69.0033  | 1.3597   | 0.2273 | 0.7086 | 0.8294 |
| A | 61.3636  | 4.0938   | 0.3678 | 0.6380 | 0.7790 |
| A | 55.4690  | 4.5111   | 1.4395 | 0.7478 | 0.8557 |
| A | 27.0464  | 1.6362   | 0.9294 | 0.7389 | 0.8499 |

Processing aupcphexdnic7prod6psd1pbetols.log  
PG=C01

Method BasisSet Imaginary Freqs  
RPBE1PBE GenECP 0

HF Energy  
-1017.9069905

|    | ZPE       | E298     | S298      | Squasihar | Equasihar | Strans | Srot   |
|----|-----------|----------|-----------|-----------|-----------|--------|--------|
|    | 160.91177 | 170.834  | 129.875   | 125.918   | 170.858   | 43.828 | 33.247 |
| 31 |           |          |           |           |           |        |        |
| C  | 0.382302  | 2.448442 | 1.286733  |           |           |        |        |
| C  | 1.634588  | 1.569020 | 1.213940  |           |           |        |        |
| C  | 1.431385  | 0.770350 | -0.081770 |           |           |        |        |



|    |           |           |           |
|----|-----------|-----------|-----------|
| C  | 0.845000  | 1.806205  | -1.051597 |
| C  | 0.009914  | 2.764228  | -0.179146 |
| C  | 0.642605  | -0.497107 | 0.058222  |
| Au | -1.416590 | -0.331094 | -0.049746 |
| P  | -3.736655 | -0.263445 | -0.151205 |
| C  | 1.130898  | -1.731947 | 0.294101  |
| C  | 2.535114  | -2.235097 | 0.493631  |
| C  | 3.594693  | -1.177239 | 0.832113  |
| C  | 3.731102  | -0.256863 | -0.308010 |
| O  | 4.845699  | -0.294353 | -0.971221 |
| O  | 2.839155  | 0.525038  | -0.733322 |
| H  | 3.285701  | -0.606022 | 1.712980  |
| H  | 4.563651  | -1.637854 | 1.031434  |
| H  | 2.527640  | -2.945304 | 1.328524  |
| H  | 2.859954  | -2.817580 | -0.379861 |
| H  | -4.338943 | 0.949696  | -0.535299 |
| H  | -4.367575 | -1.152712 | -1.041700 |
| H  | -4.450226 | -0.538195 | 1.030996  |
| H  | 0.405416  | -2.541491 | 0.364774  |
| H  | 4.822846  | 0.315178  | -1.733171 |
| H  | 0.272683  | 1.325761  | -1.849178 |
| H  | 1.676528  | 2.347973  | -1.513107 |
| H  | 1.756108  | 0.937870  | 2.096906  |
| H  | 2.526875  | 2.197030  | 1.099250  |
| H  | 0.238026  | 3.802954  | -0.436044 |
| H  | -1.061782 | 2.623324  | -0.347088 |
| H  | -0.425692 | 1.893817  | 1.774692  |
| H  | 0.564748  | 3.348245  | 1.880917  |

WARNING: Geometry optimization converged in opt job, but not in freq job

Population analysis using the SCF density.

| Label | Frequencies | IR Inten | Raman Activ | Depolar (P) | Depolar (U) | Dipole |
|-------|-------------|----------|-------------|-------------|-------------|--------|
| A     | 3711.0833   | 245.8331 | 127.7247    | 0.2440      | 0.3922      | 4.3731 |
| A     | 3194.3298   | 0.6460   | 100.2338    | 0.6484      | 0.7867      |        |
| A     | 3184.3601   | 3.8934   | 121.2301    | 0.2329      | 0.3778      |        |
| A     | 3164.6116   | 38.2988  | 110.2389    | 0.6737      | 0.8051      |        |
| A     | 3161.5078   | 15.1506  | 80.0917     | 0.5100      | 0.6755      |        |
| A     | 3152.3590   | 18.6852  | 240.0389    | 0.3327      | 0.4992      |        |
| A     | 3136.4691   | 6.1696   | 66.3976     | 0.6391      | 0.7798      |        |
| A     | 3128.7622   | 3.2913   | 153.6934    | 0.0864      | 0.1591      |        |
| A     | 3111.3357   | 2.8533   | 170.8591    | 0.7256      | 0.8410      |        |
| A     | 3101.7772   | 20.2858  | 549.4977    | 0.0560      | 0.1061      |        |
| A     | 3095.0944   | 36.6687  | 44.7420     | 0.5887      | 0.7411      |        |
| A     | 3090.9888   | 12.1187  | 73.2171     | 0.5269      | 0.6902      |        |
| A     | 3077.9514   | 17.6398  | 135.3419    | 0.1547      | 0.2680      |        |
| A     | 3062.8325   | 16.4470  | 387.9671    | 0.1385      | 0.2434      |        |

|   |           |          |          |        |        |
|---|-----------|----------|----------|--------|--------|
| A | 2537.9438 | 2.8306   | 225.6888 | 0.7349 | 0.8472 |
| A | 2536.3027 | 3.1046   | 213.5429 | 0.7144 | 0.8334 |
| A | 2520.5244 | 34.5555  | 712.7668 | 0.0504 | 0.0960 |
| A | 1690.5337 | 17.0568  | 88.4752  | 0.1147 | 0.2059 |
| A | 1655.8974 | 800.3908 | 9.9650   | 0.1783 | 0.3026 |
| A | 1566.3988 | 245.2766 | 7.1551   | 0.0718 | 0.1339 |
| A | 1505.5178 | 9.4626   | 6.3443   | 0.7343 | 0.8468 |
| A | 1493.8771 | 29.1410  | 12.8522  | 0.7268 | 0.8418 |
| A | 1484.2116 | 21.6720  | 4.0501   | 0.7497 | 0.8569 |
| A | 1475.1515 | 2.3296   | 24.2236  | 0.6973 | 0.8217 |
| A | 1471.6868 | 19.4401  | 24.1454  | 0.5202 | 0.6844 |
| A | 1464.6726 | 15.5181  | 15.6801  | 0.7365 | 0.8483 |
| A | 1389.1879 | 29.8186  | 34.8270  | 0.2964 | 0.4573 |
| A | 1374.0426 | 16.4308  | 2.1903   | 0.6272 | 0.7709 |
| A | 1366.7239 | 2.8635   | 9.3453   | 0.2976 | 0.4587 |
| A | 1344.7264 | 6.8078   | 1.1242   | 0.7448 | 0.8537 |
| A | 1330.6272 | 1.7883   | 4.9017   | 0.7242 | 0.8401 |
| A | 1325.2826 | 17.9885  | 5.5526   | 0.4709 | 0.6403 |
| A | 1317.8902 | 1.1417   | 3.5491   | 0.7494 | 0.8567 |
| A | 1291.5786 | 16.1566  | 8.2463   | 0.7433 | 0.8528 |
| A | 1258.7287 | 30.7882  | 5.4393   | 0.7090 | 0.8297 |
| A | 1249.5862 | 11.3775  | 5.9483   | 0.7247 | 0.8404 |
| A | 1247.4834 | 105.3887 | 4.5598   | 0.2678 | 0.4224 |
| A | 1245.6828 | 24.1102  | 6.5225   | 0.7115 | 0.8314 |
| A | 1212.1806 | 10.0265  | 5.7053   | 0.6103 | 0.7580 |
| A | 1179.5256 | 44.2510  | 2.3409   | 0.7488 | 0.8563 |
| A | 1170.6658 | 8.0944   | 6.8504   | 0.4060 | 0.5775 |
| A | 1129.6986 | 5.7325   | 26.5373  | 0.7500 | 0.8571 |
| A | 1126.8306 | 4.6646   | 27.3221  | 0.7418 | 0.8518 |
| A | 1110.6689 | 2.7784   | 4.6249   | 0.2063 | 0.3420 |
| A | 1093.1759 | 4.3389   | 10.0625  | 0.6516 | 0.7890 |
| A | 1063.0583 | 7.8016   | 3.6386   | 0.2741 | 0.4303 |
| A | 1044.2934 | 5.7845   | 3.4989   | 0.2102 | 0.3473 |
| A | 1023.8338 | 1.0936   | 3.1595   | 0.6866 | 0.8142 |
| A | 1006.2723 | 4.8822   | 4.7632   | 0.6555 | 0.7919 |
| A | 1003.4494 | 194.9199 | 28.6629  | 0.7447 | 0.8537 |
| A | 996.6193  | 21.6741  | 18.0247  | 0.2556 | 0.4071 |
| A | 955.2705  | 57.9787  | 1.7515   | 0.4462 | 0.6170 |
| A | 940.4859  | 62.4282  | 14.7511  | 0.7371 | 0.8486 |
| A | 925.0953  | 0.1328   | 14.4407  | 0.0365 | 0.0704 |
| A | 880.1861  | 9.4539   | 16.5943  | 0.3969 | 0.5683 |
| A | 863.3974  | 24.7249  | 1.0715   | 0.4058 | 0.5774 |
| A | 845.8269  | 35.4066  | 0.7069   | 0.5865 | 0.7394 |
| A | 815.7660  | 17.6713  | 2.5866   | 0.2865 | 0.4454 |
| A | 784.9019  | 15.9359  | 4.4822   | 0.0774 | 0.1436 |
| A | 762.1131  | 58.9039  | 3.1362   | 0.5173 | 0.6819 |
| A | 720.3897  | 43.1323  | 12.4290  | 0.0356 | 0.0688 |

|   |          |          |         |        |        |
|---|----------|----------|---------|--------|--------|
| A | 706.2007 | 133.2633 | 4.4614  | 0.7208 | 0.8378 |
| A | 695.0529 | 116.0297 | 0.5245  | 0.5714 | 0.7273 |
| A | 639.6006 | 17.0431  | 3.0058  | 0.1835 | 0.3101 |
| A | 622.3359 | 14.6468  | 7.7965  | 0.0390 | 0.0752 |
| A | 574.7028 | 13.7729  | 2.7201  | 0.6205 | 0.7659 |
| A | 518.6821 | 7.4158   | 1.2809  | 0.3328 | 0.4994 |
| A | 491.8099 | 1.8732   | 0.3861  | 0.3694 | 0.5396 |
| A | 489.5677 | 0.2333   | 0.8518  | 0.1613 | 0.2777 |
| A | 450.0743 | 11.3517  | 2.5401  | 0.5532 | 0.7123 |
| A | 375.2220 | 1.9470   | 4.7250  | 0.2568 | 0.4087 |
| A | 338.2883 | 1.9198   | 2.8979  | 0.6913 | 0.8175 |
| A | 324.8726 | 12.9722  | 8.3335  | 0.1547 | 0.2679 |
| A | 305.0095 | 2.9286   | 12.2958 | 0.1416 | 0.2481 |
| A | 269.3614 | 13.9493  | 5.7692  | 0.4089 | 0.5805 |
| A | 265.3785 | 2.2188   | 2.3279  | 0.1809 | 0.3063 |
| A | 211.2619 | 1.9942   | 1.8538  | 0.6244 | 0.7688 |
| A | 186.7343 | 3.6884   | 2.2063  | 0.1431 | 0.2504 |
| A | 174.2716 | 0.6560   | 0.3229  | 0.5645 | 0.7217 |
| A | 156.4670 | 0.4619   | 1.3825  | 0.4666 | 0.6363 |
| A | 126.7928 | 0.7655   | 2.3283  | 0.7494 | 0.8568 |
| A | 102.6706 | 1.5997   | 0.4506  | 0.7353 | 0.8475 |
| A | 101.7181 | 0.1840   | 0.0367  | 0.7039 | 0.8262 |
| A | 97.9410  | 0.0797   | 0.1009  | 0.7499 | 0.8571 |
| A | 77.1589  | 3.9216   | 1.1088  | 0.7268 | 0.8418 |
| A | 54.0303  | 3.8845   | 0.9073  | 0.7340 | 0.8466 |
| A | 32.7866  | 6.5445   | 1.2589  | 0.7400 | 0.8506 |

5-exo-trig TS for 4,5-Au-PH<sub>3</sub> complex of 6,6-cyclopentano-hexa-4,5-dienoic acid:

Processing aupcphexdienic5ts6psd1pbetols.log  
PG=C01

WARNING: Imaginary frequencies

| Method   | BasisSet | Imaginary Freqs |
|----------|----------|-----------------|
| RPBE1PBE | GenECP   | 1               |

HF Energy  
-1017.9130185

| ZPE       | E298     | S298     | Squasihar | Equasihar | Strans | Srot   |
|-----------|----------|----------|-----------|-----------|--------|--------|
| 159.15743 | 169.244  | 133.878  | 127.865   | 169.282   | 43.828 | 33.878 |
| 31        |          |          |           |           |        |        |
| C         | 0.943522 | 1.491948 | -0.057775 |           |        |        |
| C         | 0.508816 | 0.219282 | -0.099161 |           |        |        |

|    |           |           |           |
|----|-----------|-----------|-----------|
| C  | 1.258264  | -1.010184 | -0.101020 |
| C  | 1.738201  | -1.592426 | 1.216446  |
| C  | 3.009965  | -2.384896 | 0.928993  |
| C  | 3.612097  | -1.653840 | -0.215086 |
| O  | 4.853133  | -1.866176 | -0.539830 |
| Au | -1.512829 | -0.254063 | -0.064963 |
| P  | -3.784097 | -0.737627 | -0.059678 |
| O  | 2.884627  | -0.864356 | -0.845507 |
| H  | -4.156135 | -2.092445 | 0.022806  |
| H  | -4.561618 | -0.190892 | 0.978200  |
| H  | -4.529903 | -0.334441 | -1.183092 |
| C  | 0.043514  | 2.698468  | 0.102411  |
| C  | 2.380557  | 1.989198  | -0.150986 |
| H  | 0.922114  | -1.755584 | -0.824600 |
| H  | 1.935332  | -0.778669 | 1.920205  |
| H  | 0.953089  | -2.222294 | 1.642855  |
| H  | 3.703762  | -2.454833 | 1.770432  |
| H  | 2.808453  | -3.409948 | 0.588108  |
| H  | 5.101284  | -1.343553 | -1.324184 |
| C  | 2.275974  | 3.521451  | -0.134239 |
| H  | 2.946568  | 1.633730  | 0.722182  |
| H  | 2.896205  | 1.609547  | -1.036966 |
| H  | 3.148881  | 4.000330  | 0.319707  |
| H  | 2.192141  | 3.898979  | -1.160907 |
| C  | 0.973825  | 3.797381  | 0.619799  |
| H  | -0.353795 | 2.988755  | -0.881003 |
| H  | -0.815740 | 2.489284  | 0.748909  |
| H  | 0.582637  | 4.805018  | 0.451253  |
| H  | 1.131206  | 3.678401  | 1.699725  |

Population analysis using the SCF density.

| Label | Frequencies | IR Inten | Dipole |
|-------|-------------|----------|--------|
| A     | 3730.0619   | 244.0084 | 6.1870 |
| A     | 3176.3889   | 0.1053   |        |
| A     | 3170.9701   | 4.7777   |        |
| A     | 3155.1624   | 7.9970   |        |
| A     | 3143.8809   | 32.3066  |        |
| A     | 3138.9290   | 24.5499  |        |
| A     | 3133.2375   | 31.5538  |        |
| A     | 3120.9727   | 21.4135  |        |
| A     | 3110.6342   | 1.6787   |        |
| A     | 3082.9056   | 6.2226   |        |
| A     | 3076.2106   | 40.4797  |        |
| A     | 3068.9155   | 35.2701  |        |
| A     | 3051.6071   | 5.8927   |        |
| A     | 3047.9421   | 27.3063  |        |
| A     | 2539.5211   | 2.6013   |        |

|   |           |          |
|---|-----------|----------|
| A | 2538.2031 | 2.3506   |
| A | 2521.6841 | 34.7779  |
| A | 1728.2357 | 67.8288  |
| A | 1701.9159 | 953.4523 |
| A | 1546.3628 | 161.4072 |
| A | 1501.0014 | 1.2122   |
| A | 1484.5091 | 8.5073   |
| A | 1468.9978 | 19.6841  |
| A | 1461.8034 | 6.3951   |
| A | 1457.4064 | 7.0311   |
| A | 1434.2165 | 51.4476  |
| A | 1402.8460 | 98.6847  |
| A | 1350.4104 | 2.1121   |
| A | 1337.4263 | 0.0657   |
| A | 1330.5177 | 0.7950   |
| A | 1321.6721 | 2.0301   |
| A | 1311.7283 | 25.4073  |
| A | 1300.4403 | 1.2176   |
| A | 1260.3033 | 3.1981   |
| A | 1239.6594 | 89.6209  |
| A | 1236.6541 | 4.4908   |
| A | 1228.2336 | 44.4358  |
| A | 1208.8787 | 51.0508  |
| A | 1205.1460 | 91.7450  |
| A | 1195.5209 | 5.8662   |
| A | 1169.7746 | 11.8354  |
| A | 1151.5776 | 4.2348   |
| A | 1128.1270 | 8.2412   |
| A | 1122.8591 | 5.5175   |
| A | 1112.5089 | 94.2730  |
| A | 1075.2109 | 30.2775  |
| A | 1051.2908 | 11.7250  |
| A | 1031.0502 | 4.1909   |
| A | 1018.0111 | 10.0721  |
| A | 1000.1772 | 255.5304 |
| A | 984.4155  | 7.0572   |
| A | 948.9937  | 3.1585   |
| A | 935.6964  | 2.1972   |
| A | 924.0071  | 0.6040   |
| A | 907.0754  | 26.8964  |
| A | 875.8629  | 4.4637   |
| A | 858.6770  | 33.3776  |
| A | 841.3620  | 25.8787  |
| A | 785.9887  | 16.5603  |
| A | 722.3593  | 72.9726  |
| A | 694.0436  | 62.6477  |
| A | 666.3423  | 108.5141 |

|   |           |          |
|---|-----------|----------|
| A | 621.1737  | 3.8728   |
| A | 585.8746  | 13.5536  |
| A | 557.6715  | 20.4681  |
| A | 518.1484  | 24.8029  |
| A | 498.7465  | 9.2739   |
| A | 491.5557  | 4.7658   |
| A | 480.7773  | 16.6280  |
| A | 446.4229  | 76.0876  |
| A | 385.4888  | 55.0049  |
| A | 306.3205  | 0.5076   |
| A | 305.4401  | 56.3296  |
| A | 262.1206  | 8.1182   |
| A | 233.1275  | 17.7289  |
| A | 187.5622  | 34.8623  |
| A | -184.6136 | 560.9826 |
| A | 169.4378  | 14.0536  |
| A | 145.4402  | 5.2310   |
| A | 120.2304  | 3.8211   |
| A | 109.5729  | 3.0365   |
| A | 93.4995   | 1.1375   |
| A | 71.9570   | 5.1392   |
| A | 71.3011   | 0.4835   |
| A | 62.1159   | 4.4116   |
| A | 50.5484   | 6.0400   |
| A | 31.1856   | 3.6973   |

6-endo-dig TS for 4,5-Au-PH3 complex of 6,6-cyclopentano-hexa-4,5-dienoic acid:

Processing aupcphexdienic6ts6psdm6.log  
PG=C01

WARNING: Imaginary frequencies

| Method | BasisSet | Imaginary Freqs |
|--------|----------|-----------------|
| RM06   | GenECP   | 1               |

HF Energy  
-1018.2477285

|    | ZPE       | E298      | S298      | Squasihar | Equasihar | Strans | Srot   |
|----|-----------|-----------|-----------|-----------|-----------|--------|--------|
|    | 157.22546 | 167.441   | 134.225   | 128.501   | 167.481   | 43.828 | 33.831 |
| 31 |           |           |           |           |           |        |        |
| C  | 1.584536  | 1.425601  | -0.083684 |           |           |        |        |
| C  | 1.400170  | 0.126382  | -0.193846 |           |           |        |        |
| C  | 0.537288  | -0.999637 | -0.326895 |           |           |        |        |
| Au | -1.486157 | -0.346825 | -0.086952 |           |           |        |        |

|   |           |           |           |
|---|-----------|-----------|-----------|
| P | -3.780929 | 0.185395  | 0.128852  |
| C | 0.889994  | -2.126747 | 0.648842  |
| C | 2.230186  | -2.755955 | 0.281744  |
| C | 3.290171  | -1.750061 | 0.003859  |
| O | 3.103953  | -0.543289 | -0.214411 |
| O | 4.507918  | -2.237390 | -0.018641 |
| C | 2.888706  | 2.192184  | -0.056529 |
| C | 0.436827  | 2.411392  | 0.052095  |
| H | 0.543555  | -1.371313 | -1.366178 |
| H | -4.119538 | 1.413104  | 0.725778  |
| H | -4.571346 | -0.695103 | 0.888403  |
| H | -4.537867 | 0.257269  | -1.054003 |
| H | 0.925136  | -1.734622 | 1.673675  |
| H | 0.124501  | -2.908938 | 0.637350  |
| H | 2.610525  | -3.442865 | 1.046968  |
| H | 2.143093  | -3.358611 | -0.635759 |
| H | 5.148751  | -1.538582 | -0.239447 |
| C | 2.465708  | 3.659764  | -0.159999 |
| H | 3.388039  | 1.999542  | 0.904009  |
| H | 3.577052  | 1.868719  | -0.842818 |
| H | 3.203360  | 4.340153  | 0.275830  |
| H | 2.343193  | 3.941479  | -1.214846 |
| C | 1.114942  | 3.691874  | 0.545937  |
| H | -0.008669 | 2.573972  | -0.941125 |
| H | -0.358352 | 2.038519  | 0.710349  |
| H | 0.526005  | 4.588329  | 0.329022  |
| H | 1.256741  | 3.643850  | 1.634449  |

Population analysis using the SCF density.

| Label | Frequencies | IR Inten | Dipole |
|-------|-------------|----------|--------|
| A     | 3767.1862   | 185.0400 | 1.0747 |
| A     | 3126.4046   | 12.9379  |        |
| A     | 3122.4324   | 11.4454  |        |
| A     | 3120.0774   | 14.5655  |        |
| A     | 3118.6247   | 5.3872   |        |
| A     | 3106.5834   | 1.5319   |        |
| A     | 3083.7862   | 17.7872  |        |
| A     | 3054.9273   | 12.6335  |        |
| A     | 3049.6703   | 27.7366  |        |
| A     | 3042.9572   | 16.8864  |        |
| A     | 3038.2500   | 9.0765   |        |
| A     | 3036.2977   | 2.7221   |        |
| A     | 3022.6202   | 13.1992  |        |
| A     | 3007.4044   | 4.1959   |        |
| A     | 2529.0430   | 3.7559   |        |
| A     | 2527.4201   | 3.4773   |        |
| A     | 2508.8670   | 29.2035  |        |

|   |           |          |
|---|-----------|----------|
| A | 1835.9506 | 88.0519  |
| A | 1716.4868 | 753.6654 |
| A | 1501.0058 | 219.1234 |
| A | 1476.9032 | 2.0481   |
| A | 1462.2543 | 10.1516  |
| A | 1456.4491 | 4.9254   |
| A | 1436.4156 | 10.6241  |
| A | 1431.1722 | 9.9399   |
| A | 1410.2798 | 49.9444  |
| A | 1355.8214 | 7.2787   |
| A | 1341.0226 | 1.7899   |
| A | 1328.9144 | 34.7567  |
| A | 1322.6299 | 0.6064   |
| A | 1318.3690 | 0.7585   |
| A | 1304.8913 | 6.4028   |
| A | 1283.1784 | 2.0508   |
| A | 1249.0204 | 13.5726  |
| A | 1246.0899 | 9.3672   |
| A | 1224.3029 | 4.1853   |
| A | 1209.2312 | 151.5396 |
| A | 1191.3017 | 13.8434  |
| A | 1175.5902 | 2.5082   |
| A | 1166.6569 | 7.0668   |
| A | 1143.9301 | 1.6938   |
| A | 1126.3473 | 3.6597   |
| A | 1125.1580 | 4.2890   |
| A | 1113.1853 | 26.3899  |
| A | 1074.4096 | 2.3683   |
| A | 1046.0841 | 7.4353   |
| A | 1034.6499 | 11.0992  |
| A | 1020.6466 | 1.0965   |
| A | 1008.9977 | 129.8136 |
| A | 995.9886  | 126.4490 |
| A | 970.6343  | 1.7420   |
| A | 954.1806  | 6.7709   |
| A | 929.2216  | 0.2879   |
| A | 905.8784  | 1.1015   |
| A | 886.2457  | 13.7840  |
| A | 872.7072  | 1.6963   |
| A | 854.5736  | 16.5599  |
| A | 832.6786  | 30.5852  |
| A | 733.6996  | 23.1406  |
| A | 707.2223  | 46.6633  |
| A | 673.9216  | 90.3370  |
| A | 600.3661  | 96.5558  |
| A | 586.1815  | 9.7180   |
| A | 560.5246  | 15.4099  |



|   |           |          |
|---|-----------|----------|
| A | 550.9894  | 8.9153   |
| A | 496.3072  | 14.5351  |
| A | 479.2392  | 12.7215  |
| A | 465.5360  | 0.2518   |
| A | 458.8316  | 20.5697  |
| A | 447.3280  | 86.9375  |
| A | 389.9576  | 3.1267   |
| A | 333.0244  | 4.5760   |
| A | -286.6792 | 391.5149 |
| A | 277.6452  | 0.3022   |
| A | 276.1382  | 0.9479   |
| A | 238.1243  | 0.9837   |
| A | 189.8085  | 0.3236   |
| A | 158.9415  | 0.1563   |
| A | 149.8664  | 0.5266   |
| A | 125.6022  | 0.8317   |
| A | 94.1855   | 1.2889   |
| A | 81.9202   | 2.2495   |
| A | 80.9363   | 0.0213   |
| A | 71.2888   | 0.4613   |
| A | 61.1827   | 3.1424   |
| A | 50.8861   | 2.7296   |
| A | 39.1459   | 1.3481   |

Processing aupcphexdienic6ts6psd1pbedcms.log  
PG=C01

WARNING: Imaginary frequencies

| Method   | BasisSet | Imaginary Freqs |
|----------|----------|-----------------|
| RPBE1PBE | GenECP   | 1               |

HF Energy  
-1017.9351268

|    | ZPE       | E298      | S298      | Squasihar | Equasihar | Strans | Srot   |
|----|-----------|-----------|-----------|-----------|-----------|--------|--------|
|    | 158.59317 | 168.635   | 131.748   | 127.977   | 168.663   | 43.828 | 33.824 |
| 31 |           |           |           |           |           |        |        |
| C  | 1.560508  | 1.428855  | -0.101311 |           |           |        |        |
| C  | 1.345224  | 0.134763  | -0.207368 |           |           |        |        |
| C  | 0.514708  | -0.999226 | -0.338797 |           |           |        |        |
| Au | -1.491478 | -0.337992 | -0.091002 |           |           |        |        |
| P  | -3.728792 | 0.177121  | 0.151740  |           |           |        |        |
| C  | 0.866205  | -2.126415 | 0.638760  |           |           |        |        |
| C  | 2.203909  | -2.763130 | 0.269431  |           |           |        |        |
| C  | 3.282121  | -1.769116 | 0.014176  |           |           |        |        |
| O  | 3.116841  | -0.562407 | -0.209112 |           |           |        |        |

|   |           |           |           |
|---|-----------|-----------|-----------|
| O | 4.498404  | -2.272483 | 0.014746  |
| C | 2.887881  | 2.163779  | -0.076607 |
| C | 0.434652  | 2.444394  | 0.039316  |
| H | 0.515844  | -1.366722 | -1.376787 |
| H | -4.055535 | 1.512257  | 0.450588  |
| H | -4.425708 | -0.504966 | 1.165166  |
| H | -4.559138 | -0.063744 | -0.957517 |
| H | 0.908283  | -1.738259 | 1.662030  |
| H | 0.100966  | -2.906309 | 0.618582  |
| H | 2.560088  | -3.459763 | 1.035143  |
| H | 2.114019  | -3.345391 | -0.658919 |
| H | 5.145647  | -1.574954 | -0.202982 |
| C | 2.502000  | 3.646613  | -0.141634 |
| H | 3.398428  | 1.938193  | 0.867872  |
| H | 3.551562  | 1.847228  | -0.884781 |
| H | 3.254599  | 4.291013  | 0.322606  |
| H | 2.395043  | 3.959074  | -1.187981 |
| C | 1.143802  | 3.701245  | 0.554569  |
| H | 0.003493  | 2.633156  | -0.952733 |
| H | -0.372051 | 2.082347  | 0.684494  |
| H | 0.579393  | 4.613420  | 0.337982  |
| H | 1.275693  | 3.636483  | 1.642021  |

Population analysis using the SCF density.

| Label | Frequencies | IR Inten  | Dipole |
|-------|-------------|-----------|--------|
| A     | 3712.2787   | 273.1784  | 1.5797 |
| A     | 3156.4945   | 11.1836   |        |
| A     | 3151.8296   | 22.5064   |        |
| A     | 3143.5446   | 41.9943   |        |
| A     | 3143.0431   | 3.8532    |        |
| A     | 3137.7529   | 38.4200   |        |
| A     | 3128.8915   | 20.4776   |        |
| A     | 3096.5105   | 22.6531   |        |
| A     | 3082.4173   | 15.0362   |        |
| A     | 3076.2215   | 49.2656   |        |
| A     | 3073.6659   | 6.4941    |        |
| A     | 3072.2931   | 37.3626   |        |
| A     | 3066.0553   | 16.1407   |        |
| A     | 3049.9300   | 5.6854    |        |
| A     | 2547.6184   | 3.6551    |        |
| A     | 2545.5416   | 3.7061    |        |
| A     | 2528.1251   | 34.0663   |        |
| A     | 1857.1071   | 223.3931  |        |
| A     | 1707.7200   | 1022.5749 |        |
| A     | 1490.5602   | 4.2352    |        |
| A     | 1486.7089   | 273.1871  |        |
| A     | 1475.7076   | 8.9084    |        |

|   |           |          |
|---|-----------|----------|
| A | 1471.3622 | 28.2596  |
| A | 1450.8923 | 16.2591  |
| A | 1450.2225 | 17.2331  |
| A | 1416.7211 | 73.4068  |
| A | 1372.5081 | 13.3933  |
| A | 1351.9906 | 3.3610   |
| A | 1340.4131 | 52.7922  |
| A | 1334.5316 | 0.6246   |
| A | 1329.9395 | 0.9889   |
| A | 1317.5127 | 11.6361  |
| A | 1296.4605 | 2.0910   |
| A | 1261.3799 | 29.0920  |
| A | 1259.6116 | 14.1792  |
| A | 1235.0539 | 6.6268   |
| A | 1218.7166 | 223.2038 |
| A | 1202.7978 | 34.2079  |
| A | 1187.4995 | 6.1713   |
| A | 1171.3916 | 11.0689  |
| A | 1152.0514 | 4.5316   |
| A | 1127.1783 | 49.4796  |
| A | 1122.0231 | 10.6004  |
| A | 1118.6457 | 6.4440   |
| A | 1076.5681 | 3.0881   |
| A | 1053.7077 | 9.2547   |
| A | 1044.7571 | 14.3820  |
| A | 1033.7633 | 3.8571   |
| A | 991.2548  | 179.5684 |
| A | 980.8756  | 2.2565   |
| A | 979.0600  | 166.0852 |
| A | 955.4092  | 88.3402  |
| A | 936.9326  | 5.6257   |
| A | 918.5090  | 1.7178   |
| A | 890.4403  | 26.8246  |
| A | 883.3104  | 4.6530   |
| A | 857.6157  | 12.4814  |
| A | 841.9305  | 53.9413  |
| A | 733.8817  | 28.2822  |
| A | 711.1160  | 41.8712  |
| A | 657.1748  | 136.0454 |
| A | 599.6769  | 59.8690  |
| A | 592.6527  | 95.5585  |
| A | 567.7974  | 17.3007  |
| A | 555.3953  | 35.2449  |
| A | 505.2710  | 31.8957  |
| A | 501.6578  | 2.8783   |
| A | 497.6354  | 1.0219   |
| A | 475.2169  | 44.7678  |

|   |           |          |
|---|-----------|----------|
| A | 453.3742  | 158.5111 |
| A | 393.5637  | 6.7641   |
| A | 331.5769  | 10.2083  |
| A | 311.7366  | 0.9762   |
| A | -290.9609 | 670.8882 |
| A | 279.7514  | 1.5261   |
| A | 234.4843  | 2.5156   |
| A | 191.9738  | 0.7707   |
| A | 160.5919  | 0.2132   |
| A | 147.2574  | 0.7298   |
| A | 117.8240  | 2.2471   |
| A | 107.0537  | 0.7531   |
| A | 97.4629   | 2.1017   |
| A | 93.5794   | 0.2819   |
| A | 82.9606   | 1.2058   |
| A | 62.7887   | 3.2863   |
| A | 56.1210   | 4.4878   |
| A | 54.9044   | 2.9049   |

Processing aupcpheXdienic6ts6psd1pbtols.log  
PG=C01

WARNING: Imaginary frequencies

| Method   | BasisSet | Imaginary Freqs |
|----------|----------|-----------------|
| RPBE1PBE | GenECP   | 1               |

HF Energy  
-1017.9103162

|    | ZPE       | E298      | S298      | Squasihar | Equasihar | Strans | Srot   |
|----|-----------|-----------|-----------|-----------|-----------|--------|--------|
|    | 158.97818 | 169.027   | 131.960   | 128.141   | 169.055   | 43.828 | 33.829 |
| 31 |           |           |           |           |           |        |        |
| C  | 1.558652  | 1.432292  | -0.100366 |           |           |        |        |
| C  | 1.338114  | 0.140864  | -0.208149 |           |           |        |        |
| C  | 0.514108  | -0.998025 | -0.342000 |           |           |        |        |
| Au | -1.491816 | -0.339043 | -0.089388 |           |           |        |        |
| P  | -3.731705 | 0.176272  | 0.150583  |           |           |        |        |
| C  | 0.868108  | -2.129766 | 0.629842  |           |           |        |        |
| C  | 2.206244  | -2.766157 | 0.257513  |           |           |        |        |
| C  | 3.287256  | -1.770122 | 0.013678  |           |           |        |        |
| O  | 3.121732  | -0.566652 | -0.218036 |           |           |        |        |
| O  | 4.503553  | -2.272739 | 0.034224  |           |           |        |        |
| C  | 2.886142  | 2.166795  | -0.083630 |           |           |        |        |
| C  | 0.433878  | 2.448912  | 0.049060  |           |           |        |        |
| H  | 0.510392  | -1.358799 | -1.382398 |           |           |        |        |

|   |           |           |           |
|---|-----------|-----------|-----------|
| H | -4.062291 | 1.510425  | 0.450699  |
| H | -4.433189 | -0.507364 | 1.159995  |
| H | -4.558908 | -0.062488 | -0.961647 |
| H | 0.910231  | -1.745833 | 1.654633  |
| H | 0.103217  | -2.910110 | 0.609494  |
| H | 2.558470  | -3.472298 | 1.016104  |
| H | 2.117784  | -3.341567 | -0.675252 |
| H | 5.149705  | -1.574023 | -0.170735 |
| C | 2.500553  | 3.649483  | -0.148629 |
| H | 3.400384  | 1.941489  | 0.858796  |
| H | 3.545516  | 1.847606  | -0.893912 |
| H | 3.255876  | 4.294281  | 0.309479  |
| H | 2.389080  | 3.961717  | -1.194271 |
| C | 1.147630  | 3.706458  | 0.556655  |
| H | -0.005373 | 2.635356  | -0.939876 |
| H | -0.366835 | 2.088734  | 0.702936  |
| H | 0.582859  | 4.618497  | 0.342319  |
| H | 1.285751  | 3.645427  | 1.643249  |

Population analysis using the SCF density.

| Label | Frequencies | IR Inten | Dipole |
|-------|-------------|----------|--------|
| A     | 3742.3059   | 192.6453 | 1.1743 |
| A     | 3157.7624   | 6.3531   |        |
| A     | 3157.1125   | 13.8457  |        |
| A     | 3149.7890   | 23.1623  |        |
| A     | 3145.2235   | 2.0691   |        |
| A     | 3144.3361   | 24.1278  |        |
| A     | 3128.0996   | 18.5563  |        |
| A     | 3098.8238   | 13.1173  |        |
| A     | 3085.4683   | 17.6823  |        |
| A     | 3081.6683   | 24.7712  |        |
| A     | 3077.0085   | 25.9543  |        |
| A     | 3076.3122   | 4.0334   |        |
| A     | 3066.3246   | 13.1698  |        |
| A     | 3048.6636   | 3.3234   |        |
| A     | 2546.8309   | 1.5084   |        |
| A     | 2544.5469   | 1.5070   |        |
| A     | 2527.1798   | 24.7400  |        |
| A     | 1861.5632   | 172.4780 |        |
| A     | 1724.6083   | 875.0084 |        |
| A     | 1501.7714   | 0.8709   |        |
| A     | 1495.6419   | 220.5796 |        |
| A     | 1485.2416   | 8.9792   |        |
| A     | 1481.6677   | 25.0541  |        |
| A     | 1457.8549   | 12.8460  |        |
| A     | 1457.3322   | 13.6283  |        |
| A     | 1433.9388   | 62.0108  |        |

|   |           |          |
|---|-----------|----------|
| A | 1378.1559 | 9.1825   |
| A | 1355.7192 | 2.6377   |
| A | 1345.7405 | 48.4852  |
| A | 1338.3262 | 0.3196   |
| A | 1333.2543 | 0.5691   |
| A | 1323.2053 | 4.6317   |
| A | 1297.9468 | 2.3611   |
| A | 1264.5246 | 25.5151  |
| A | 1261.7417 | 7.5930   |
| A | 1238.2346 | 5.2488   |
| A | 1220.1064 | 193.5003 |
| A | 1206.2127 | 26.5643  |
| A | 1194.1216 | 4.3698   |
| A | 1169.6848 | 8.5169   |
| A | 1155.8603 | 4.9491   |
| A | 1129.7156 | 35.1138  |
| A | 1128.0095 | 5.8660   |
| A | 1123.7874 | 2.9103   |
| A | 1082.6874 | 4.3310   |
| A | 1058.2393 | 6.1073   |
| A | 1048.2626 | 14.8895  |
| A | 1036.7899 | 2.3954   |
| A | 1000.2325 | 112.7560 |
| A | 989.5127  | 212.1010 |
| A | 983.1033  | 2.3118   |
| A | 959.9348  | 28.1327  |
| A | 938.0006  | 3.2542   |
| A | 919.8869  | 1.4000   |
| A | 892.4143  | 19.4428  |
| A | 885.3483  | 2.6240   |
| A | 857.4661  | 8.9201   |
| A | 841.9311  | 43.5854  |
| A | 735.0060  | 23.7618  |
| A | 713.6213  | 38.6604  |
| A | 663.3538  | 101.7469 |
| A | 598.9537  | 74.9202  |
| A | 594.5778  | 64.8885  |
| A | 568.7115  | 9.8669   |
| A | 557.0447  | 34.5658  |
| A | 506.8103  | 27.5389  |
| A | 502.5154  | 6.1528   |
| A | 498.7754  | 0.5056   |
| A | 475.9768  | 50.1940  |
| A | 454.6949  | 105.9744 |
| A | 392.6821  | 6.0216   |
| A | 326.2774  | 6.5825   |
| A | 310.9332  | 0.9544   |

|   |           |          |
|---|-----------|----------|
| A | 276.9385  | 1.1435   |
| A | -264.3542 | 467.0559 |
| A | 234.1932  | 1.6988   |
| A | 194.0782  | 0.5706   |
| A | 159.4194  | 0.0690   |
| A | 143.8369  | 1.0965   |
| A | 111.1354  | 1.2513   |
| A | 105.9155  | 1.4067   |
| A | 99.5587   | 0.1247   |
| A | 93.5154   | 2.6619   |
| A | 78.6186   | 1.6903   |
| A | 63.9817   | 0.1736   |
| A | 56.8979   | 3.5949   |
| A | 53.6001   | 3.7129   |

6-exo-dig TS for 4,5-Au-PH<sub>3</sub> complex of 6,6-cyclopentano-hexa-4,5-dienoic acid:

Processing aupcphehdienic6xts6psdm6.log  
PG=C01

WARNING: Imaginary frequencies

| Method | BasisSet | Imaginary Freqs |
|--------|----------|-----------------|
| RM06   | GenECP   | 1               |

HF Energy  
-1018.2314342

|    | ZPE       | E298      | S298      | Squasihar | Equasihar | Strans | Srot   |
|----|-----------|-----------|-----------|-----------|-----------|--------|--------|
|    | 157.08090 | 167.445   | 136.499   | 128.785   | 167.490   | 43.828 | 33.495 |
| 31 |           |           |           |           |           |        |        |
| C  | 0.427246  | 0.709992  | -0.002922 |           |           |        |        |
| Au | -1.580960 | -0.058314 | -0.003448 |           |           |        |        |
| P  | -3.859911 | -0.699997 | -0.004615 |           |           |        |        |
| C  | 1.259808  | -0.454705 | -0.101844 |           |           |        |        |
| C  | 1.273795  | -1.778000 | -0.052985 |           |           |        |        |
| C  | 2.485970  | -2.657284 | -0.129295 |           |           |        |        |
| C  | 3.718563  | -1.985919 | 0.462920  |           |           |        |        |
| C  | 3.846303  | -0.610032 | -0.065765 |           |           |        |        |
| O  | 2.863543  | 0.082707  | -0.397113 |           |           |        |        |
| O  | 5.049210  | -0.120892 | -0.165516 |           |           |        |        |
| H  | 3.617457  | -1.886814 | 1.555412  |           |           |        |        |
| H  | 4.645901  | -2.535803 | 0.278335  |           |           |        |        |
| H  | 2.294635  | -3.592182 | 0.405254  |           |           |        |        |
| H  | 2.672232  | -2.941471 | -1.175363 |           |           |        |        |
| H  | -4.161671 | -2.073332 | -0.052117 |           |           |        |        |

|   |           |           |           |
|---|-----------|-----------|-----------|
| H | -4.660262 | -0.229732 | -1.061605 |
| H | -4.639871 | -0.308574 | 1.098607  |
| C | 0.621913  | 1.732734  | -1.153064 |
| C | 0.664201  | 1.545893  | 1.277624  |
| H | 0.301735  | -2.255179 | 0.044801  |
| H | 5.025815  | 0.797808  | -0.491201 |
| H | 1.071642  | 1.261074  | -2.035148 |
| H | -0.348142 | 2.122760  | -1.481359 |
| C | 1.483090  | 2.884683  | -0.578455 |
| H | 0.909280  | 0.923921  | 2.147791  |
| C | 1.751228  | 2.553724  | 0.898463  |
| H | -0.258552 | 2.088835  | 1.524682  |
| H | 2.414795  | 3.012742  | -1.141610 |
| H | 0.941229  | 3.833326  | -0.664616 |
| H | 1.727991  | 3.442909  | 1.537537  |
| H | 2.745572  | 2.105433  | 1.025193  |

Population analysis using the SCF density.

| Label | Frequencies | IR Inten | Dipole |
|-------|-------------|----------|--------|
| A     | 3747.3259   | 175.5113 | 4.7695 |
| A     | 3198.3289   | 11.5811  |        |
| A     | 3133.0027   | 0.3815   |        |
| A     | 3119.6642   | 1.7130   |        |
| A     | 3116.1686   | 43.7959  |        |
| A     | 3105.8774   | 7.5626   |        |
| A     | 3094.0708   | 6.6628   |        |
| A     | 3092.8159   | 12.6298  |        |
| A     | 3058.9682   | 38.3996  |        |
| A     | 3050.8195   | 20.7802  |        |
| A     | 3044.8159   | 41.5514  |        |
| A     | 3040.7758   | 8.6458   |        |
| A     | 3033.7986   | 15.7637  |        |
| A     | 3029.1808   | 2.2762   |        |
| A     | 2522.8760   | 4.3460   |        |
| A     | 2522.1424   | 4.3408   |        |
| A     | 2503.5322   | 38.8794  |        |
| A     | 1803.8757   | 143.4156 |        |
| A     | 1690.0271   | 795.6344 |        |
| A     | 1538.6301   | 160.7257 |        |
| A     | 1485.6681   | 7.0162   |        |
| A     | 1466.6658   | 9.5758   |        |
| A     | 1455.9245   | 4.5609   |        |
| A     | 1453.2409   | 5.7763   |        |
| A     | 1449.2148   | 10.1147  |        |
| A     | 1414.2199   | 42.7327  |        |
| A     | 1358.4213   | 2.2822   |        |
| A     | 1333.4385   | 7.2421   |        |



|   |           |          |
|---|-----------|----------|
| A | 1328.1600 | 5.2611   |
| A | 1320.6919 | 7.3292   |
| A | 1306.7027 | 15.2757  |
| A | 1299.8791 | 6.2718   |
| A | 1273.2389 | 1.6508   |
| A | 1258.8319 | 5.3417   |
| A | 1234.9021 | 14.7964  |
| A | 1218.8910 | 100.7806 |
| A | 1205.5416 | 29.8712  |
| A | 1193.5548 | 3.0730   |
| A | 1187.4338 | 3.8731   |
| A | 1176.1212 | 7.4009   |
| A | 1124.7550 | 3.2105   |
| A | 1124.3211 | 3.5210   |
| A | 1104.5200 | 21.5087  |
| A | 1092.1272 | 6.1374   |
| A | 1062.4138 | 0.3269   |
| A | 1045.7741 | 17.4321  |
| A | 1036.5499 | 7.3847   |
| A | 1019.2100 | 13.8308  |
| A | 1006.3767 | 227.8483 |
| A | 961.6854  | 12.9925  |
| A | 951.1920  | 2.6385   |
| A | 926.1090  | 26.1275  |
| A | 908.2881  | 7.6104   |
| A | 901.3548  | 0.6493   |
| A | 873.7822  | 14.7979  |
| A | 836.5130  | 3.2966   |
| A | 817.5512  | 14.4973  |
| A | 779.0157  | 95.1671  |
| A | 754.5566  | 29.3583  |
| A | 745.5003  | 1.9299   |
| A | 719.7080  | 88.0577  |
| A | 669.5753  | 93.5520  |
| A | 635.8340  | 33.9126  |
| A | 584.3983  | 17.5822  |
| A | 579.1418  | 84.5297  |
| A | 544.3702  | 4.9084   |
| A | 464.9188  | 4.1983   |
| A | 454.5985  | 1.2415   |
| A | 448.4486  | 2.2794   |
| A | 422.9537  | 2.7263   |
| A | -324.8731 | 662.1411 |
| A | 320.2798  | 12.0307  |
| A | 306.8373  | 1.4617   |
| A | 275.1362  | 0.5745   |
| A | 244.5725  | 1.6375   |

|   |          |        |
|---|----------|--------|
| A | 213.5860 | 6.9178 |
| A | 177.0361 | 5.6254 |
| A | 174.6569 | 1.5190 |
| A | 160.9122 | 0.3089 |
| A | 118.8380 | 2.0004 |
| A | 100.1028 | 1.9565 |
| A | 73.4423  | 0.8237 |
| A | 66.4106  | 0.5748 |
| A | 57.7550  | 3.7513 |
| A | 51.5687  | 4.3298 |
| A | 45.8187  | 1.5920 |
| A | 29.7528  | 0.9901 |

Processing aupcphexdienic6xts6psd1pbedcms.log  
PG=C01

WARNING: Imaginary frequencies

| Method   | BasisSet | Imaginary Freqs |
|----------|----------|-----------------|
| RPBE1PBE | GenECP   | 1               |

HF Energy  
-1017.9214391

|    | ZPE       | E298      | S298      | Squasihar | Equasihar | Strans | Srot   |
|----|-----------|-----------|-----------|-----------|-----------|--------|--------|
|    | 158.34653 | 168.616   | 134.553   | 128.925   | 168.653   | 43.828 | 33.487 |
| 31 |           |           |           |           |           |        |        |
| C  | 0.406386  | 0.753068  | -0.011011 |           |           |        |        |
| Au | -1.580194 | -0.050606 | 0.004235  |           |           |        |        |
| P  | -3.786816 | -0.722779 | 0.018455  |           |           |        |        |
| C  | 1.183954  | -0.433640 | -0.110102 |           |           |        |        |
| C  | 1.203508  | -1.755330 | -0.131597 |           |           |        |        |
| C  | 2.408251  | -2.645961 | -0.213432 |           |           |        |        |
| C  | 3.639041  | -2.046441 | 0.453004  |           |           |        |        |
| C  | 3.841456  | -0.653377 | -0.007051 |           |           |        |        |
| O  | 2.902801  | 0.095570  | -0.329516 |           |           |        |        |
| O  | 5.073827  | -0.217850 | -0.051705 |           |           |        |        |
| H  | 3.500811  | -1.990219 | 1.542676  |           |           |        |        |
| H  | 4.542053  | -2.631414 | 0.265773  |           |           |        |        |
| H  | 2.175189  | -3.600206 | 0.264942  |           |           |        |        |
| H  | 2.622273  | -2.869698 | -1.267303 |           |           |        |        |
| H  | -4.056232 | -2.074684 | -0.261668 |           |           |        |        |
| H  | -4.644800 | -0.084438 | -0.895575 |           |           |        |        |
| H  | -4.498254 | -0.550151 | 1.219710  |           |           |        |        |
| C  | 0.578146  | 1.764703  | -1.168981 |           |           |        |        |
| C  | 0.651336  | 1.610732  | 1.251792  |           |           |        |        |
| H  | 0.228562  | -2.234364 | -0.093949 |           |           |        |        |

|   |           |          |           |
|---|-----------|----------|-----------|
| H | 5.093527  | 0.717282 | -0.334495 |
| H | 0.881284  | 1.275439 | -2.099905 |
| H | -0.382744 | 2.252606 | -1.362336 |
| C | 1.601644  | 2.814729 | -0.675111 |
| H | 0.916486  | 1.006615 | 2.125507  |
| C | 1.741343  | 2.619404 | 0.851693  |
| H | -0.271977 | 2.148670 | 1.495453  |
| H | 2.567503  | 2.679049 | -1.171109 |
| H | 1.257272  | 3.825013 | -0.919873 |
| H | 1.631955  | 3.560849 | 1.400398  |
| H | 2.731215  | 2.220098 | 1.094935  |

Population analysis using the SCF density.

| Label | Frequencies | IR Inten  | Dipole |
|-------|-------------|-----------|--------|
| A     | 3703.5491   | 289.3448  | 5.0770 |
| A     | 3221.5453   | 27.1538   |        |
| A     | 3171.9389   | 0.7504    |        |
| A     | 3152.8459   | 5.7177    |        |
| A     | 3146.8188   | 92.7836   |        |
| A     | 3138.9712   | 26.6049   |        |
| A     | 3129.6179   | 3.4961    |        |
| A     | 3118.6029   | 14.2090   |        |
| A     | 3093.2052   | 68.3807   |        |
| A     | 3082.3311   | 81.2262   |        |
| A     | 3078.4897   | 29.8141   |        |
| A     | 3076.5394   | 14.9684   |        |
| A     | 3074.6033   | 17.8594   |        |
| A     | 3066.6899   | 5.8739    |        |
| A     | 2546.0661   | 3.6167    |        |
| A     | 2544.5795   | 3.7148    |        |
| A     | 2527.2914   | 39.0612   |        |
| A     | 1824.3817   | 244.9839  |        |
| A     | 1688.3583   | 1136.0774 |        |
| A     | 1518.4017   | 294.0357  |        |
| A     | 1494.6964   | 2.3710    |        |
| A     | 1475.6726   | 10.2481   |        |
| A     | 1471.5982   | 10.0732   |        |
| A     | 1466.0926   | 3.2188    |        |
| A     | 1458.5261   | 4.8335    |        |
| A     | 1423.7927   | 59.4426   |        |
| A     | 1373.2350   | 3.4942    |        |
| A     | 1352.3230   | 32.7512   |        |
| A     | 1338.0034   | 4.2154    |        |
| A     | 1329.0908   | 3.4594    |        |
| A     | 1325.7932   | 18.4775   |        |
| A     | 1302.9696   | 2.6096    |        |
| A     | 1287.3058   | 0.8604    |        |

|   |           |           |
|---|-----------|-----------|
| A | 1265.0644 | 19.4855   |
| A | 1251.4358 | 33.0912   |
| A | 1240.2501 | 177.3941  |
| A | 1213.0845 | 12.2936   |
| A | 1212.4164 | 3.7529    |
| A | 1197.3899 | 13.2040   |
| A | 1185.5665 | 14.5017   |
| A | 1120.6146 | 34.3132   |
| A | 1119.7105 | 13.5452   |
| A | 1118.1691 | 4.3103    |
| A | 1109.4494 | 2.6682    |
| A | 1072.9190 | 4.7983    |
| A | 1055.4036 | 28.3432   |
| A | 1047.3199 | 10.3749   |
| A | 1028.7025 | 40.1834   |
| A | 991.3315  | 244.0444  |
| A | 971.8974  | 13.5946   |
| A | 959.1937  | 2.3245    |
| A | 939.6297  | 39.4307   |
| A | 913.1305  | 10.6472   |
| A | 904.5035  | 4.6317    |
| A | 868.3207  | 37.1008   |
| A | 827.6060  | 7.8513    |
| A | 819.7166  | 30.0920   |
| A | 790.4522  | 8.1414    |
| A | 765.2152  | 214.2584  |
| A | 730.0709  | 26.9367   |
| A | 707.6222  | 122.0467  |
| A | 655.2859  | 127.8747  |
| A | 649.2542  | 51.5585   |
| A | 581.8125  | 73.0618   |
| A | 576.2617  | 85.3672   |
| A | 551.5989  | 16.0522   |
| A | 500.0046  | 0.2298    |
| A | 493.6586  | 0.5108    |
| A | 463.0930  | 8.3831    |
| A | 416.4071  | 0.7814    |
| A | -350.8312 | 1200.6490 |
| A | 321.0192  | 15.6524   |
| A | 314.1365  | 6.1424    |
| A | 300.4825  | 2.6068    |
| A | 220.5455  | 3.6524    |
| A | 205.0581  | 4.6350    |
| A | 176.3033  | 7.9019    |
| A | 154.3869  | 0.6542    |
| A | 139.2091  | 1.4732    |
| A | 122.5418  | 1.6031    |

|   |          |        |
|---|----------|--------|
| A | 105.7522 | 1.1660 |
| A | 82.4806  | 0.2350 |
| A | 78.7208  | 2.6670 |
| A | 69.8137  | 4.8164 |
| A | 66.8045  | 5.8873 |
| A | 57.5218  | 0.0600 |
| A | 32.7411  | 0.2760 |

Processing aupcphexdienic6xts6psd1pbtols.log  
 PG=C01

WARNING: Imaginary frequencies

|          |          |                 |
|----------|----------|-----------------|
| Method   | BasisSet | Imaginary Freqs |
| RPBE1PBE | GenECP   | 1               |

HF Energy  
 -1017.8953496

|    | ZPE       | E298      | S298      | Squasihar | Equasihar | Strans | Srot   |
|----|-----------|-----------|-----------|-----------|-----------|--------|--------|
|    | 158.84825 | 169.007   | 132.353   | 128.531   | 169.036   | 43.828 | 33.487 |
| 31 |           |           |           |           |           |        |        |
| C  | 1.715551  | 2.641763  | 0.835996  |           |           |        |        |
| C  | 0.642248  | 1.617575  | 1.243549  |           |           |        |        |
| C  | 0.404105  | 0.747765  | -0.013392 |           |           |        |        |
| C  | 0.570501  | 1.752666  | -1.179144 |           |           |        |        |
| C  | 1.596288  | 2.803553  | -0.696415 |           |           |        |        |
| Au | -1.577999 | -0.056063 | 0.005245  |           |           |        |        |
| P  | -3.791250 | -0.717268 | 0.026131  |           |           |        |        |
| C  | 1.196118  | -0.432142 | -0.107562 |           |           |        |        |
| C  | 1.216309  | -1.753935 | -0.140594 |           |           |        |        |
| C  | 2.421478  | -2.643499 | -0.234561 |           |           |        |        |
| C  | 3.652300  | -2.049889 | 0.438789  |           |           |        |        |
| C  | 3.842602  | -0.645078 | 0.008179  |           |           |        |        |
| O  | 5.070245  | -0.198574 | -0.022479 |           |           |        |        |
| O  | 2.899448  | 0.103624  | -0.301971 |           |           |        |        |
| H  | 3.519144  | -2.020299 | 1.530165  |           |           |        |        |
| H  | 4.560153  | -2.623112 | 0.237276  |           |           |        |        |
| H  | 2.191896  | -3.604601 | 0.231737  |           |           |        |        |
| H  | 2.633894  | -2.856261 | -1.291120 |           |           |        |        |
| H  | -4.228836 | -1.482631 | 1.122847  |           |           |        |        |
| H  | -4.243644 | -1.506287 | -1.047417 |           |           |        |        |
| H  | -4.750943 | 0.311573  | 0.021665  |           |           |        |        |
| H  | 0.241933  | -2.233322 | -0.109149 |           |           |        |        |
| H  | 5.082956  | 0.739137  | -0.287483 |           |           |        |        |
| H  | 0.865394  | 1.259104  | -2.110196 |           |           |        |        |

|   |           |          |           |
|---|-----------|----------|-----------|
| H | -0.391014 | 2.240518 | -1.369164 |
| H | 0.915439  | 1.024148 | 2.121875  |
| H | -0.287588 | 2.143186 | 1.487724  |
| H | 2.565545  | 2.647261 | -1.179001 |
| H | 1.267277  | 3.810846 | -0.970073 |
| H | 1.575763  | 3.590596 | 1.363390  |
| H | 2.710760  | 2.275096 | 1.107170  |

Population analysis using the SCF density.

| Label | Frequencies | IR Inten | Dipole |
|-------|-------------|----------|--------|
| A     | 3730.1719   | 197.4647 | 4.6980 |
| A     | 3226.9305   | 19.7326  |        |
| A     | 3170.7389   | 0.5610   |        |
| A     | 3152.7400   | 56.9836  |        |
| A     | 3152.6430   | 6.3299   |        |
| A     | 3142.9173   | 18.1184  |        |
| A     | 3134.3837   | 1.8535   |        |
| A     | 3123.8275   | 13.0002  |        |
| A     | 3098.8378   | 52.2381  |        |
| A     | 3086.3464   | 53.1223  |        |
| A     | 3084.8714   | 13.7692  |        |
| A     | 3080.1550   | 13.9827  |        |
| A     | 3076.6111   | 10.2949  |        |
| A     | 3066.5614   | 4.0787   |        |
| A     | 2546.1512   | 2.4043   |        |
| A     | 2538.7041   | 1.9222   |        |
| A     | 2523.0100   | 30.0827  |        |
| A     | 1824.9262   | 195.4534 |        |
| A     | 1698.7006   | 976.1746 |        |
| A     | 1530.0281   | 215.2438 |        |
| A     | 1509.1802   | 3.9807   |        |
| A     | 1486.6336   | 9.2466   |        |
| A     | 1482.5144   | 10.0145  |        |
| A     | 1474.6649   | 3.2570   |        |
| A     | 1470.2291   | 4.6879   |        |
| A     | 1438.3699   | 51.2019  |        |
| A     | 1376.8187   | 3.3582   |        |
| A     | 1353.0374   | 19.8325  |        |
| A     | 1343.3270   | 7.2310   |        |
| A     | 1333.0321   | 9.6416   |        |
| A     | 1329.7489   | 10.9343  |        |
| A     | 1305.7061   | 2.2035   |        |
| A     | 1293.7439   | 0.8805   |        |
| A     | 1267.9540   | 18.6912  |        |
| A     | 1254.2397   | 8.5299   |        |
| A     | 1235.3526   | 143.8753 |        |
| A     | 1218.1740   | 4.9149   |        |

|   |           |          |
|---|-----------|----------|
| A | 1215.1470 | 23.9698  |
| A | 1202.7507 | 6.5844   |
| A | 1193.4615 | 10.4135  |
| A | 1125.1730 | 5.2714   |
| A | 1124.7168 | 34.1792  |
| A | 1123.4491 | 1.6282   |
| A | 1109.4178 | 0.8970   |
| A | 1077.0885 | 2.4867   |
| A | 1057.0259 | 24.5848  |
| A | 1051.0339 | 11.1297  |
| A | 1032.0012 | 33.1161  |
| A | 990.2308  | 223.3439 |
| A | 973.9176  | 16.2551  |
| A | 962.2681  | 1.4521   |
| A | 940.9341  | 34.8799  |
| A | 912.6225  | 10.7236  |
| A | 906.7925  | 3.6366   |
| A | 870.8181  | 26.8574  |
| A | 825.9994  | 6.9609   |
| A | 823.0965  | 21.2681  |
| A | 797.1501  | 4.8403   |
| A | 772.3242  | 172.7616 |
| A | 733.9117  | 23.0518  |
| A | 711.3333  | 93.4646  |
| A | 661.8919  | 122.5773 |
| A | 655.5535  | 22.5793  |
| A | 586.0034  | 50.3953  |
| A | 578.4211  | 78.8604  |
| A | 555.3385  | 13.1459  |
| A | 488.9966  | 0.6322   |
| A | 482.7188  | 0.0077   |
| A | 464.0190  | 8.5513   |
| A | 417.9243  | 1.3027   |
| A | 320.8708  | 14.1241  |
| A | -320.1878 | 896.9449 |
| A | 312.0543  | 4.5750   |
| A | 302.9233  | 2.4631   |
| A | 222.0591  | 3.4434   |
| A | 205.4396  | 4.9031   |
| A | 179.4731  | 8.4424   |
| A | 154.8255  | 0.2894   |
| A | 139.9308  | 0.8255   |
| A | 130.4807  | 1.9438   |
| A | 113.3403  | 1.7124   |
| A | 101.9702  | 0.2438   |
| A | 85.8337   | 0.1113   |
| A | 80.1995   | 0.5146   |

|   |         |        |
|---|---------|--------|
| A | 70.8964 | 4.6418 |
| A | 65.5921 | 6.1479 |
| A | 44.5677 | 0.5324 |

7-endo-trig TS for 4,5-Au-PH3 complex of 6,6-cyclopentano-hexa-4,5-dienoic acid:

Processing aupcphehdienic7ts6psdm6.log  
PG=C01

WARNING: Imaginary frequencies

|        |          |                 |
|--------|----------|-----------------|
| Method | BasisSet | Imaginary Freqs |
| RM06   | GenECP   | 1               |

HF Energy  
-1018.2476133

|    | ZPE       | E298      | S298      | Squasihar | Equasihar | Strans | Srot   |
|----|-----------|-----------|-----------|-----------|-----------|--------|--------|
|    | 157.93378 | 168.035   | 133.501   | 127.025   | 168.075   | 43.828 | 33.475 |
| 31 |           |           |           |           |           |        |        |
| O  | 2.881161  | 0.299314  | -0.520547 |           |           |        |        |
| C  | 1.290006  | 0.598345  | 0.014988  |           |           |        |        |
| C  | 0.455936  | -0.612376 | -0.022208 |           |           |        |        |
| C  | 0.806843  | -1.909606 | -0.004748 |           |           |        |        |
| C  | 2.152637  | -2.573384 | 0.086866  |           |           |        |        |
| C  | 3.257256  | -1.736693 | 0.744380  |           |           |        |        |
| C  | 3.630710  | -0.632267 | -0.160397 |           |           |        |        |
| O  | 4.832663  | -0.690376 | -0.664627 |           |           |        |        |
| Au | -1.603610 | -0.199822 | -0.026631 |           |           |        |        |
| P  | -3.947556 | 0.139197  | -0.023133 |           |           |        |        |
| C  | 1.520442  | 1.309103  | 1.334184  |           |           |        |        |
| C  | 0.998294  | 1.716574  | -0.969251 |           |           |        |        |
| C  | 2.139617  | 2.671034  | 0.985743  |           |           |        |        |
| C  | 1.856754  | 2.901732  | -0.517299 |           |           |        |        |
| H  | -4.666508 | -0.276870 | 1.112113  |           |           |        |        |
| H  | -4.690081 | -0.492034 | -1.037484 |           |           |        |        |
| H  | -4.420090 | 1.458206  | -0.150218 |           |           |        |        |
| H  | -0.003117 | -2.638705 | -0.053288 |           |           |        |        |
| H  | 2.043703  | -3.484253 | 0.687536  |           |           |        |        |
| H  | 2.485980  | -2.923411 | -0.902254 |           |           |        |        |
| H  | 2.886955  | -1.320184 | 1.689405  |           |           |        |        |
| H  | 4.146798  | -2.337566 | 0.949822  |           |           |        |        |
| H  | 2.096519  | 0.712486  | 2.050841  |           |           |        |        |
| H  | 0.521973  | 1.423966  | 1.778002  |           |           |        |        |
| H  | 1.149241  | 1.398979  | -2.006723 |           |           |        |        |
| H  | -0.069813 | 1.945572  | -0.859960 |           |           |        |        |
| H  | 3.217482  | 2.669668  | 1.182519  |           |           |        |        |



|   |          |          |           |
|---|----------|----------|-----------|
| H | 1.715815 | 3.461722 | 1.611879  |
| H | 2.792346 | 2.938071 | -1.085360 |
| H | 1.345903 | 3.851176 | -0.701943 |
| H | 4.983827 | 0.044924 | -1.286203 |

Population analysis using the SCF density.

| Label | Frequencies | IR Inten | Dipole |
|-------|-------------|----------|--------|
| A     | 3752.5964   | 194.7351 | 2.7911 |
| A     | 3147.8053   | 0.1436   |        |
| A     | 3143.8929   | 2.6697   |        |
| A     | 3133.5469   | 22.0414  |        |
| A     | 3120.5856   | 3.3134   |        |
| A     | 3115.7586   | 2.8177   |        |
| A     | 3107.0454   | 11.8455  |        |
| A     | 3090.3239   | 1.8399   |        |
| A     | 3075.1353   | 30.4413  |        |
| A     | 3069.0738   | 1.5272   |        |
| A     | 3065.8394   | 16.2079  |        |
| A     | 3056.6988   | 24.8235  |        |
| A     | 3052.5390   | 3.9899   |        |
| A     | 3023.3592   | 14.6309  |        |
| A     | 2526.4414   | 5.0925   |        |
| A     | 2522.7381   | 5.4968   |        |
| A     | 2505.7036   | 36.3167  |        |
| A     | 1708.7560   | 40.9345  |        |
| A     | 1690.4285   | 650.4832 |        |
| A     | 1533.3451   | 197.2152 |        |
| A     | 1492.6049   | 10.2149  |        |
| A     | 1468.7127   | 9.0686   |        |
| A     | 1448.6420   | 15.6008  |        |
| A     | 1441.6666   | 3.5080   |        |
| A     | 1432.7261   | 33.3270  |        |
| A     | 1425.3298   | 11.3722  |        |
| A     | 1381.7735   | 45.0943  |        |
| A     | 1354.2628   | 3.9748   |        |
| A     | 1348.4101   | 3.3673   |        |
| A     | 1327.2755   | 0.7624   |        |
| A     | 1310.0550   | 1.6547   |        |
| A     | 1301.5866   | 5.5329   |        |
| A     | 1293.4983   | 9.2821   |        |
| A     | 1250.3472   | 5.6253   |        |
| A     | 1243.5035   | 13.3196  |        |
| A     | 1238.1763   | 13.9361  |        |
| A     | 1225.6285   | 131.1907 |        |
| A     | 1201.6169   | 4.4336   |        |
| A     | 1171.2910   | 17.7089  |        |
| A     | 1164.3264   | 13.9771  |        |

|   |           |          |
|---|-----------|----------|
| A | 1156.1702 | 55.7359  |
| A | 1134.1685 | 8.4916   |
| A | 1127.3435 | 3.0126   |
| A | 1125.8462 | 3.4956   |
| A | 1073.7896 | 5.2854   |
| A | 1054.0899 | 13.9506  |
| A | 1017.2921 | 0.7164   |
| A | 1014.1292 | 12.8516  |
| A | 1009.6525 | 183.3725 |
| A | 980.6039  | 2.8176   |
| A | 969.3774  | 6.5441   |
| A | 938.7090  | 26.5156  |
| A | 918.8162  | 49.6287  |
| A | 899.2368  | 1.9105   |
| A | 867.6466  | 3.8873   |
| A | 844.8963  | 26.2901  |
| A | 827.3003  | 34.5477  |
| A | 798.8360  | 11.1697  |
| A | 773.6811  | 7.8932   |
| A | 758.5515  | 69.5507  |
| A | 717.0381  | 41.9222  |
| A | 676.4669  | 67.4896  |
| A | 651.1866  | 4.3703   |
| A | 609.3441  | 84.7231  |
| A | 578.1341  | 9.3600   |
| A | 549.1094  | 1.8128   |
| A | 474.9743  | 23.5820  |
| A | 467.4903  | 3.0385   |
| A | 451.9645  | 0.9419   |
| A | 405.2923  | 33.7955  |
| A | 359.8603  | 13.8785  |
| A | 327.9899  | 1.3606   |
| A | 292.7431  | 3.1561   |
| A | 275.4091  | 1.3070   |
| A | 240.0112  | 2.9597   |
| A | 190.0507  | 14.1168  |
| A | 168.8013  | 5.9944   |
| A | 158.6920  | 5.1498   |
| A | 142.6517  | 2.2832   |
| A | -120.1118 | 181.4058 |
| A | 117.9489  | 0.7529   |
| A | 97.1748   | 1.9435   |
| A | 64.7082   | 5.0435   |
| A | 63.0439   | 2.6145   |
| A | 59.5874   | 1.8388   |
| A | 54.6407   | 2.9133   |
| A | 28.7877   | 1.7077   |

SM+ for 5,6-Au-PH3 complex of hexa-4,5-dienoic acid:

Processing auphexdienic6sm6psdm6.log  
PG=C01

Method BasisSet Imaginary Freqs  
RM06 GenECP 0

HF Energy  
-862.3215188

|    | ZPE       | E298      | S298      | Squasihar | Equasihar | Strans | Srot   |
|----|-----------|-----------|-----------|-----------|-----------|--------|--------|
|    | 98.66091  | 107.426   | 126.576   | 117.902   | 107.474   | 43.392 | 32.358 |
| 21 |           |           |           |           |           |        |        |
| C  | -0.332792 | 0.482290  | 1.556813  |           |           |        |        |
| C  | -0.905153 | 0.825936  | 0.385801  |           |           |        |        |
| Au | 1.370553  | 0.026069  | 0.179026  |           |           |        |        |
| P  | 3.384456  | -0.577465 | -0.880434 |           |           |        |        |
| C  | -1.603258 | 1.157340  | -0.663578 |           |           |        |        |
| C  | -3.045160 | 1.589679  | -0.533619 |           |           |        |        |
| C  | -4.006807 | 0.486433  | -0.957998 |           |           |        |        |
| C  | -4.009898 | -0.681222 | -0.008222 |           |           |        |        |
| O  | -3.350475 | -0.762661 | 1.004919  |           |           |        |        |
| O  | -4.847778 | -1.637052 | -0.420170 |           |           |        |        |
| H  | -0.587055 | -0.483543 | 2.001396  |           |           |        |        |
| H  | 0.073747  | 1.251530  | 2.217322  |           |           |        |        |
| H  | -1.165751 | 1.095771  | -1.660651 |           |           |        |        |
| H  | 4.010544  | 0.414027  | -1.651992 |           |           |        |        |
| H  | 3.325676  | -1.655845 | -1.777192 |           |           |        |        |
| H  | 4.418718  | -0.971877 | -0.017045 |           |           |        |        |
| H  | -3.250931 | 1.880950  | 0.501787  |           |           |        |        |
| H  | -3.199185 | 2.473735  | -1.162590 |           |           |        |        |
| H  | -5.032011 | 0.875409  | -1.007985 |           |           |        |        |
| H  | -3.790549 | 0.111338  | -1.967521 |           |           |        |        |
| H  | -4.839298 | -2.354011 | 0.234780  |           |           |        |        |

WARNING: Geometry optimization converged in opt job, but not in freq job

Population analysis using the SCF density.

| Label | Frequencies | IR Inten | Raman Activ | Depolar (P) | Depolar (U) | Dipole |
|-------|-------------|----------|-------------|-------------|-------------|--------|
| A     | 3800.9846   | 132.7255 | 101.7608    | 0.2162      | 0.3555      | 4.6067 |
| A     | 3190.3536   | 9.3541   | 68.9682     | 0.7366      | 0.8483      |        |
| A     | 3161.6530   | 4.6683   | 64.2863     | 0.1502      | 0.2611      |        |
| A     | 3128.5317   | 2.0404   | 54.9393     | 0.7402      | 0.8507      |        |
| A     | 3102.6627   | 0.4443   | 146.1696    | 0.5348      | 0.6969      |        |
| A     | 3090.8395   | 9.5881   | 135.5873    | 0.1293      | 0.2289      |        |

|   |           |          |          |        |        |
|---|-----------|----------|----------|--------|--------|
| A | 3065.4718 | 8.1008   | 137.8558 | 0.1028 | 0.1865 |
| A | 3052.1036 | 4.0422   | 170.9841 | 0.0799 | 0.1480 |
| A | 2543.1497 | 0.1953   | 121.6588 | 0.7487 | 0.8563 |
| A | 2541.9339 | 0.1758   | 124.5851 | 0.7447 | 0.8537 |
| A | 2518.4517 | 6.6383   | 379.4900 | 0.0354 | 0.0684 |
| A | 1976.7163 | 132.0761 | 51.4491  | 0.5656 | 0.7225 |
| A | 1853.1293 | 300.3609 | 6.6174   | 0.0708 | 0.1322 |
| A | 1450.1103 | 22.5493  | 11.9657  | 0.6514 | 0.7889 |
| A | 1440.3609 | 119.6161 | 0.8485   | 0.7322 | 0.8454 |
| A | 1427.7026 | 20.6461  | 8.7055   | 0.7500 | 0.8571 |
| A | 1419.7771 | 21.0463  | 13.7354  | 0.7481 | 0.8559 |
| A | 1358.1675 | 7.7847   | 5.3334   | 0.4971 | 0.6641 |
| A | 1309.5304 | 7.1154   | 5.3504   | 0.4655 | 0.6353 |
| A | 1301.4341 | 31.1819  | 3.8425   | 0.5764 | 0.7313 |
| A | 1231.0994 | 24.5363  | 5.5291   | 0.6300 | 0.7730 |
| A | 1199.9724 | 80.5765  | 2.2687   | 0.7500 | 0.8571 |
| A | 1174.3698 | 158.1211 | 0.4810   | 0.3642 | 0.5340 |
| A | 1118.4686 | 3.1255   | 16.8782  | 0.7432 | 0.8527 |
| A | 1116.9436 | 3.3337   | 16.7954  | 0.7461 | 0.8546 |
| A | 1098.2164 | 1.1291   | 21.9057  | 0.1559 | 0.2697 |
| A | 1055.9260 | 11.8613  | 9.7943   | 0.2177 | 0.3576 |
| A | 1022.3571 | 26.0073  | 50.9900  | 0.1579 | 0.2728 |
| A | 1015.8208 | 1.1632   | 0.2249   | 0.5517 | 0.7111 |
| A | 992.4524  | 170.7975 | 14.6873  | 0.6286 | 0.7720 |
| A | 946.4776  | 27.3758  | 3.8584   | 0.7294 | 0.8435 |
| A | 922.5000  | 71.7845  | 2.4082   | 0.6049 | 0.7538 |
| A | 892.4395  | 5.7321   | 6.8694   | 0.7085 | 0.8294 |
| A | 873.1131  | 9.5886   | 3.2503   | 0.3792 | 0.5499 |
| A | 814.6898  | 8.2052   | 14.4675  | 0.0476 | 0.0908 |
| A | 716.0624  | 16.5027  | 1.4646   | 0.1873 | 0.3156 |
| A | 672.5074  | 106.4042 | 0.5327   | 0.6789 | 0.8087 |
| A | 619.1387  | 30.9829  | 2.6525   | 0.6381 | 0.7791 |
| A | 557.7734  | 8.3780   | 2.3707   | 0.2859 | 0.4446 |
| A | 521.9066  | 22.2178  | 0.7860   | 0.7498 | 0.8570 |
| A | 490.6530  | 21.4792  | 1.6473   | 0.5847 | 0.7379 |
| A | 481.9629  | 2.3314   | 0.5182   | 0.5585 | 0.7167 |
| A | 472.1480  | 2.8836   | 0.9283   | 0.3297 | 0.4959 |
| A | 360.2355  | 11.8802  | 5.7443   | 0.5650 | 0.7221 |
| A | 347.6592  | 4.5136   | 2.1585   | 0.7396 | 0.8503 |
| A | 304.2380  | 3.9008   | 0.5632   | 0.6214 | 0.7665 |
| A | 289.4325  | 2.3425   | 9.9249   | 0.2034 | 0.3381 |
| A | 261.6255  | 1.5400   | 0.6854   | 0.7327 | 0.8457 |
| A | 175.4702  | 2.1378   | 1.4953   | 0.3948 | 0.5662 |
| A | 129.5313  | 0.4299   | 0.3336   | 0.1486 | 0.2587 |
| A | 96.7124   | 5.3268   | 1.6194   | 0.6708 | 0.8029 |
| A | 88.0691   | 9.5077   | 2.4767   | 0.4766 | 0.6455 |
| A | 59.3817   | 2.4360   | 0.6200   | 0.6993 | 0.8230 |

|   |         |        |        |        |        |
|---|---------|--------|--------|--------|--------|
| A | 52.3970 | 2.9245 | 3.0452 | 0.7086 | 0.8294 |
| A | 44.2291 | 0.0484 | 0.6359 | 0.7311 | 0.8446 |
| A | 37.3664 | 0.6807 | 0.5652 | 0.6892 | 0.8160 |
| A | 27.8977 | 0.8760 | 2.2823 | 0.7141 | 0.8332 |

SM+ for 4,5-Au-PH3 complex of hexa-4,5-dienoic acid:

Processing auphexdienic5sm6psdm6.log

PG=C01

|        |          |                 |
|--------|----------|-----------------|
| Method | BasisSet | Imaginary Freqs |
| RM06   | GenECP   | 0               |

HF Energy

-862.3194829

|          |         |         |           |           |        |        |
|----------|---------|---------|-----------|-----------|--------|--------|
| ZPE      | E298    | S298    | Squasihar | Equasihar | Strans | Srot   |
| 98.43642 | 107.200 | 124.283 | 117.735   | 107.240   | 43.392 | 31.896 |

21

|    |           |           |           |
|----|-----------|-----------|-----------|
| C  | 0.857348  | 2.431166  | 0.133644  |
| C  | 0.840992  | 1.167328  | -0.180498 |
| C  | 1.039643  | -0.129891 | -0.498830 |
| C  | 1.704282  | -1.111142 | 0.446713  |
| Au | -1.200532 | -0.005436 | -0.083705 |
| P  | -3.503917 | -0.389818 | 0.232487  |
| H  | -3.966688 | -1.657507 | -0.154671 |
| H  | -3.980050 | -0.293580 | 1.549491  |
| H  | -4.376022 | 0.464077  | -0.460885 |
| H  | -0.013410 | 2.986413  | 0.469793  |
| H  | 1.812395  | 2.953015  | 0.057729  |
| H  | 1.027047  | -0.394601 | -1.563207 |
| H  | 1.674556  | -0.709508 | 1.466417  |
| H  | 1.161022  | -2.063681 | 0.446086  |
| C  | 3.146614  | -1.382444 | 0.026386  |
| H  | 3.583876  | -2.164549 | 0.659105  |
| H  | 3.202792  | -1.777539 | -0.997928 |
| C  | 4.033534  | -0.168891 | 0.102290  |
| O  | 5.302280  | -0.482196 | -0.166346 |
| O  | 3.660514  | 0.953644  | 0.364376  |
| H  | 5.838394  | 0.325835  | -0.108980 |

Population analysis using the SCF density.

|       |             |          |             |             |             |        |
|-------|-------------|----------|-------------|-------------|-------------|--------|
| Label | Frequencies | IR Inten | Raman Activ | Depolar (P) | Depolar (U) | Dipole |
| A     | 3797.5271   | 153.9249 | 128.1689    | 0.2346      | 0.3801      | 4.5631 |
| A     | 3242.9581   | 12.1237  | 77.0503     | 0.7454      | 0.8541      |        |
| A     | 3136.3392   | 31.5970  | 248.1911    | 0.1610      | 0.2774      |        |

|   |           |          |          |        |        |
|---|-----------|----------|----------|--------|--------|
| A | 3118.7271 | 1.5940   | 20.9290  | 0.6646 | 0.7985 |
| A | 3105.0954 | 0.0791   | 111.6853 | 0.4140 | 0.5856 |
| A | 3094.5619 | 2.2693   | 74.9119  | 0.4475 | 0.6183 |
| A | 3054.7293 | 6.8727   | 49.7122  | 0.0893 | 0.1640 |
| A | 3049.0930 | 2.9366   | 158.4726 | 0.0598 | 0.1129 |
| A | 2543.4039 | 0.1519   | 121.6947 | 0.7499 | 0.8571 |
| A | 2541.0984 | 0.1316   | 124.8940 | 0.7293 | 0.8435 |
| A | 2517.6594 | 6.6825   | 393.0001 | 0.0394 | 0.0759 |
| A | 1972.7174 | 86.5287  | 43.6769  | 0.7051 | 0.8271 |
| A | 1853.7729 | 312.1409 | 11.0511  | 0.0809 | 0.1496 |
| A | 1448.5705 | 74.0936  | 2.7667   | 0.7488 | 0.8564 |
| A | 1443.2833 | 70.9772  | 5.0618   | 0.6375 | 0.7787 |
| A | 1422.6687 | 57.6650  | 5.2033   | 0.3616 | 0.5312 |
| A | 1414.9901 | 4.9509   | 28.5209  | 0.6898 | 0.8164 |
| A | 1352.7881 | 7.7255   | 9.0761   | 0.2609 | 0.4139 |
| A | 1314.0019 | 15.6828  | 8.3013   | 0.6584 | 0.7940 |
| A | 1306.8627 | 21.7772  | 2.0012   | 0.6399 | 0.7805 |
| A | 1242.2418 | 10.2518  | 9.9725   | 0.3770 | 0.5475 |
| A | 1197.9561 | 82.3916  | 2.1415   | 0.6002 | 0.7502 |
| A | 1176.2929 | 202.8538 | 1.6818   | 0.3529 | 0.5217 |
| A | 1117.6648 | 3.4989   | 37.0414  | 0.1754 | 0.2985 |
| A | 1117.0473 | 3.3085   | 14.4724  | 0.7105 | 0.8307 |
| A | 1116.0880 | 3.2357   | 16.6967  | 0.7409 | 0.8512 |
| A | 1060.7386 | 6.7676   | 13.0070  | 0.1987 | 0.3316 |
| A | 1032.6425 | 1.9530   | 17.2057  | 0.1681 | 0.2879 |
| A | 989.8160  | 166.9114 | 14.3921  | 0.6641 | 0.7982 |
| A | 951.9832  | 4.7530   | 4.3561   | 0.4463 | 0.6171 |
| A | 931.1304  | 29.3749  | 1.8213   | 0.5506 | 0.7102 |
| A | 922.8032  | 15.4105  | 3.9769   | 0.6804 | 0.8098 |
| A | 898.7208  | 57.0585  | 1.0874   | 0.6219 | 0.7669 |
| A | 864.3365  | 8.7611   | 2.4454   | 0.7477 | 0.8557 |
| A | 809.5868  | 16.4782  | 17.7339  | 0.0689 | 0.1289 |
| A | 679.8529  | 92.3275  | 1.2605   | 0.6933 | 0.8189 |
| A | 632.2381  | 23.8049  | 2.9218   | 0.7060 | 0.8276 |
| A | 587.0510  | 47.2901  | 1.1809   | 0.7036 | 0.8260 |
| A | 537.4580  | 27.5385  | 4.6566   | 0.3431 | 0.5109 |
| A | 509.3375  | 6.0683   | 1.9342   | 0.5566 | 0.7151 |
| A | 489.1726  | 3.2795   | 0.3482   | 0.4574 | 0.6277 |
| A | 475.2134  | 4.1634   | 1.1175   | 0.1735 | 0.2957 |
| A | 472.7482  | 1.4584   | 0.5095   | 0.7352 | 0.8474 |
| A | 406.5239  | 12.3258  | 7.9177   | 0.5538 | 0.7129 |
| A | 339.5012  | 6.8516   | 0.4414   | 0.3614 | 0.5310 |
| A | 284.5354  | 1.7856   | 11.5477  | 0.2545 | 0.4058 |
| A | 257.1193  | 3.1263   | 1.3996   | 0.5439 | 0.7046 |
| A | 229.1300  | 1.2933   | 4.6421   | 0.2159 | 0.3551 |
| A | 186.5959  | 2.9601   | 1.8474   | 0.5166 | 0.6813 |
| A | 140.5690  | 3.1381   | 5.7732   | 0.6443 | 0.7837 |

|   |          |        |        |        |        |
|---|----------|--------|--------|--------|--------|
| A | 106.3904 | 3.9104 | 1.4601 | 0.5902 | 0.7423 |
| A | 99.3986  | 5.5819 | 0.5346 | 0.7499 | 0.8571 |
| A | 75.7416  | 6.9584 | 0.3038 | 0.6987 | 0.8227 |
| A | 55.4084  | 0.0307 | 0.1177 | 0.7426 | 0.8523 |
| A | 50.3789  | 1.9341 | 1.8663 | 0.7193 | 0.8367 |
| A | 45.9749  | 2.5285 | 0.8699 | 0.6460 | 0.7849 |
| A | 37.0410  | 0.6887 | 0.3510 | 0.7197 | 0.8370 |

5-exo-trig prod for 4,5-Au-PH3 complex of hexa-4,5-dienoic acid:

Processing auphexdienic5prod6psdm6.log  
PG=C01

WARNING: Imaginary frequencies

| Method | BasisSet | Imaginary Freqs |
|--------|----------|-----------------|
| RM06   | GenECP   | 1               |

HF Energy  
-862.3090589

|    | ZPE       | E298      | S298      | Squasihar | Equasihar | Strans | Srot   |
|----|-----------|-----------|-----------|-----------|-----------|--------|--------|
|    | 100.05213 | 107.585   | 113.357   | 109.361   | 107.610   | 43.392 | 31.845 |
| 21 |           |           |           |           |           |        |        |
| C  | 0.943967  | 2.127558  | 0.458845  |           |           |        |        |
| C  | 0.679713  | 0.886262  | 0.037966  |           |           |        |        |
| C  | 1.705556  | -0.044559 | -0.437517 |           |           |        |        |
| C  | 1.975928  | -1.277194 | 0.421956  |           |           |        |        |
| C  | 3.463967  | -1.575450 | 0.243694  |           |           |        |        |
| C  | 4.001255  | -0.237123 | -0.083012 |           |           |        |        |
| O  | 5.261592  | 0.024434  | -0.033433 |           |           |        |        |
| Au | -1.252331 | 0.114312  | -0.010563 |           |           |        |        |
| P  | -3.505072 | -0.641764 | -0.046101 |           |           |        |        |
| O  | 3.157611  | 0.629679  | -0.429963 |           |           |        |        |
| H  | -4.042533 | -1.045557 | -1.281726 |           |           |        |        |
| H  | -3.845755 | -1.750664 | 0.749809  |           |           |        |        |
| H  | -4.487847 | 0.275392  | 0.367883  |           |           |        |        |
| H  | 0.158408  | 2.785044  | 0.821891  |           |           |        |        |
| H  | 1.949773  | 2.550981  | 0.451322  |           |           |        |        |
| H  | 1.612848  | -0.277044 | -1.507138 |           |           |        |        |
| H  | 1.746306  | -1.039346 | 1.467427  |           |           |        |        |
| H  | 1.337169  | -2.110689 | 0.119107  |           |           |        |        |
| H  | 3.971061  | -2.013186 | 1.108394  |           |           |        |        |
| H  | 3.675263  | -2.230921 | -0.614725 |           |           |        |        |
| H  | 5.459576  | 0.941944  | -0.300664 |           |           |        |        |

WARNING: Geometry optimization converged in opt job, but not in freq job

Population analysis using the SCF density.

| Label | Frequencies | IR Inten | Raman Activ | Depolar (P) | Depolar (U) | Dipole |
|-------|-------------|----------|-------------|-------------|-------------|--------|
| A     | 3737.1737   | 261.3569 | 95.8697     | 0.2496      | 0.3994      | 6.6783 |
| A     | 3222.7877   | 2.6262   | 69.4928     | 0.7291      | 0.8433      |        |
| A     | 3149.0191   | 0.5868   | 33.7487     | 0.5718      | 0.7276      |        |
| A     | 3134.0511   | 3.5464   | 91.8845     | 0.3868      | 0.5578      |        |
| A     | 3121.9725   | 14.3819  | 156.0678    | 0.1776      | 0.3016      |        |
| A     | 3077.8092   | 5.1587   | 12.8453     | 0.2950      | 0.4555      |        |
| A     | 3067.4149   | 3.4056   | 98.6943     | 0.1683      | 0.2882      |        |
| A     | 3045.8643   | 6.6488   | 149.2986    | 0.1161      | 0.2080      |        |
| A     | 2523.6883   | 4.3872   | 134.1995    | 0.7150      | 0.8338      |        |
| A     | 2519.6187   | 5.6694   | 133.0095    | 0.7454      | 0.8541      |        |
| A     | 2503.1352   | 33.3910  | 437.7720    | 0.0527      | 0.1002      |        |
| A     | 1690.1165   | 428.5137 | 15.2502     | 0.1815      | 0.3073      |        |
| A     | 1685.5977   | 354.6518 | 23.0820     | 0.1133      | 0.2036      |        |
| A     | 1572.2514   | 97.7667  | 13.0881     | 0.1786      | 0.3031      |        |
| A     | 1458.4550   | 7.0534   | 4.2542      | 0.7076      | 0.8288      |        |
| A     | 1430.9812   | 35.1118  | 23.6629     | 0.4097      | 0.5813      |        |
| A     | 1411.1261   | 38.0380  | 10.9025     | 0.6159      | 0.7623      |        |
| A     | 1361.7406   | 37.9992  | 8.3458      | 0.7365      | 0.8483      |        |
| A     | 1301.8150   | 12.5728  | 7.0983      | 0.5803      | 0.7344      |        |
| A     | 1286.6000   | 36.8398  | 6.4980      | 0.3433      | 0.5112      |        |
| A     | 1250.3480   | 57.9733  | 2.0310      | 0.7017      | 0.8247      |        |
| A     | 1219.5264   | 22.3604  | 5.0525      | 0.5403      | 0.7016      |        |
| A     | 1193.8831   | 61.1250  | 3.1925      | 0.7296      | 0.8436      |        |
| A     | 1172.7400   | 4.8479   | 2.5680      | 0.2820      | 0.4399      |        |
| A     | 1126.3222   | 5.8483   | 16.7382     | 0.6731      | 0.8046      |        |
| A     | 1124.7116   | 4.8652   | 15.5835     | 0.6841      | 0.8124      |        |
| A     | 1118.8993   | 10.5089  | 49.8941     | 0.4543      | 0.6248      |        |
| A     | 1082.3603   | 1.3327   | 2.5895      | 0.6332      | 0.7754      |        |
| A     | 1033.1922   | 2.7666   | 4.9250      | 0.1435      | 0.2510      |        |
| A     | 1007.4741   | 96.5894  | 21.0597     | 0.6823      | 0.8112      |        |
| A     | 997.1420    | 99.8856  | 10.0016     | 0.6205      | 0.7658      |        |
| A     | 949.6775    | 2.2688   | 6.1049      | 0.2084      | 0.3450      |        |
| A     | 942.2728    | 36.0999  | 1.8782      | 0.4784      | 0.6472      |        |
| A     | 901.0609    | 89.9589  | 6.1369      | 0.2384      | 0.3849      |        |
| A     | 837.9502    | 38.6453  | 1.3319      | 0.6826      | 0.8114      |        |
| A     | 730.7145    | 69.6885  | 2.2035      | 0.5426      | 0.7035      |        |
| A     | 718.4068    | 93.6482  | 4.2728      | 0.5544      | 0.7134      |        |
| A     | 690.6121    | 114.9295 | 10.3159     | 0.2899      | 0.4495      |        |
| A     | 656.9556    | 22.8222  | 25.0543     | 0.1343      | 0.2368      |        |
| A     | 592.2362    | 8.4765   | 3.6067      | 0.1098      | 0.1979      |        |
| A     | 527.7313    | 178.7088 | 26.8883     | 0.3868      | 0.5578      |        |
| A     | 506.2258    | 14.2556  | 5.5334      | 0.2867      | 0.4457      |        |
| A     | 486.9724    | 62.6553  | 16.8679     | 0.2613      | 0.4144      |        |



|   |          |         |         |        |        |
|---|----------|---------|---------|--------|--------|
| A | 453.3294 | 0.6985  | 0.0605  | 0.6988 | 0.8227 |
| A | 438.6945 | 8.3473  | 5.6447  | 0.2252 | 0.3676 |
| A | 387.1248 | 42.0261 | 19.6267 | 0.5687 | 0.7251 |
| A | 284.1214 | 10.9995 | 4.7909  | 0.2750 | 0.4314 |
| A | 273.0666 | 1.1405  | 12.0325 | 0.1617 | 0.2784 |
| A | 261.7885 | 0.7553  | 2.5210  | 0.6597 | 0.7949 |
| A | 188.2935 | 12.0440 | 8.3816  | 0.3996 | 0.5710 |
| A | 157.6963 | 0.2259  | 0.8690  | 0.5498 | 0.7095 |
| A | 117.6861 | 2.0500  | 0.3073  | 0.5708 | 0.7268 |
| A | 93.5640  | 1.5797  | 2.0606  | 0.5533 | 0.7124 |
| A | 76.8636  | 4.0632  | 0.6729  | 0.7499 | 0.8571 |
| A | 50.5874  | 4.7105  | 1.0984  | 0.7493 | 0.8567 |
| A | 36.0371  | 1.8059  | 0.4051  | 0.7155 | 0.8341 |
| A | -32.3757 | 0.0496  | 0.0739  | 0.7348 | 0.8471 |

5-endo-dig prod for 4,5-Au-PH3 complex of hexa-4,5-dienoic acid:

Processing auphexdienic6prod6psdm6.log  
PG=C01

| Method | BasisSet | Imaginary Freqs |
|--------|----------|-----------------|
| RM06   | GenECP   | 0               |

HF Energy  
-862.3122667

|    | ZPE       | E298      | S298      | Squasihar | Equasihar | Strans | Srot   |
|----|-----------|-----------|-----------|-----------|-----------|--------|--------|
|    | 100.23146 | 108.010   | 114.507   | 110.542   | 108.037   | 43.392 | 31.690 |
| 21 |           |           |           |           |           |        |        |
| O  | -3.124398 | 0.944059  | -0.020281 |           |           |        |        |
| C  | -1.632698 | 1.061843  | 0.054368  |           |           |        |        |
| C  | -0.941013 | -0.194309 | 0.381674  |           |           |        |        |
| C  | -1.577656 | -1.363591 | -0.373108 |           |           |        |        |
| C  | -3.056198 | -1.488362 | -0.006848 |           |           |        |        |
| C  | -3.722213 | -0.173151 | -0.035049 |           |           |        |        |
| C  | -1.273776 | 2.319256  | -0.157746 |           |           |        |        |
| Au | 1.155248  | -0.070223 | 0.078319  |           |           |        |        |
| P  | 3.508261  | -0.015341 | -0.220268 |           |           |        |        |
| O  | -5.015099 | -0.154751 | -0.086805 |           |           |        |        |
| H  | -2.006256 | 3.103688  | -0.318777 |           |           |        |        |
| H  | -0.220651 | 2.576765  | -0.161690 |           |           |        |        |
| H  | -1.053114 | -0.370242 | 1.466216  |           |           |        |        |
| H  | 4.308044  | -0.187366 | 0.923961  |           |           |        |        |
| H  | 4.074888  | 1.157978  | -0.750390 |           |           |        |        |
| H  | 4.077178  | -0.977463 | -1.074127 |           |           |        |        |
| H  | -1.475533 | -1.225195 | -1.457644 |           |           |        |        |

H -1.074345 -2.303735 -0.130671  
H -3.634449 -2.169966 -0.642898  
H -3.177378 -1.865756 1.021652  
H -5.369579 0.754410 -0.081900

Population analysis using the SCF density.

| Label | Frequencies | IR Inten | Raman Activ | Depolar (P) | Depolar (U) | Dipole |
|-------|-------------|----------|-------------|-------------|-------------|--------|
| A     | 3735.9148   | 242.5647 | 128.2850    | 0.2939      | 0.4543      | 4.5407 |
| A     | 3285.1986   | 0.5438   | 55.7164     | 0.7368      | 0.8485      |        |
| A     | 3179.0930   | 3.7124   | 124.2840    | 0.1446      | 0.2527      |        |
| A     | 3127.2188   | 2.6139   | 57.6199     | 0.4935      | 0.6608      |        |
| A     | 3101.1242   | 2.2498   | 162.0967    | 0.3652      | 0.5350      |        |
| A     | 3054.9719   | 11.2025  | 33.8576     | 0.2094      | 0.3463      |        |
| A     | 3027.1845   | 8.6460   | 142.0178    | 0.0986      | 0.1794      |        |
| A     | 3001.7611   | 4.7326   | 95.9660     | 0.1944      | 0.3255      |        |
| A     | 2528.8143   | 4.7798   | 123.1207    | 0.7475      | 0.8555      |        |
| A     | 2527.5542   | 4.4310   | 131.0502    | 0.7472      | 0.8553      |        |
| A     | 2509.4332   | 31.2962  | 420.8791    | 0.0477      | 0.0911      |        |
| A     | 1760.8298   | 78.7101  | 97.0286     | 0.1227      | 0.2186      |        |
| A     | 1640.9023   | 654.6562 | 31.0541     | 0.2032      | 0.3378      |        |
| A     | 1561.6143   | 198.0742 | 18.3580     | 0.2608      | 0.4137      |        |
| A     | 1460.1198   | 5.5236   | 8.7610      | 0.5630      | 0.7204      |        |
| A     | 1399.7006   | 61.0490  | 15.5684     | 0.5050      | 0.6711      |        |
| A     | 1386.1800   | 22.0417  | 18.0560     | 0.4464      | 0.6173      |        |
| A     | 1338.2843   | 4.1188   | 7.3649      | 0.4506      | 0.6212      |        |
| A     | 1327.1500   | 5.9198   | 1.4903      | 0.4730      | 0.6422      |        |
| A     | 1295.5909   | 8.9104   | 6.4089      | 0.4119      | 0.5835      |        |
| A     | 1241.2679   | 12.0971  | 15.0943     | 0.2267      | 0.3697      |        |
| A     | 1215.3891   | 96.6238  | 11.5162     | 0.6405      | 0.7808      |        |
| A     | 1167.4190   | 0.9705   | 1.6656      | 0.4169      | 0.5885      |        |
| A     | 1128.1974   | 4.0364   | 16.0932     | 0.7428      | 0.8524      |        |
| A     | 1127.2581   | 3.3688   | 16.1805     | 0.7489      | 0.8564      |        |
| A     | 1094.3420   | 48.0572  | 23.6638     | 0.6400      | 0.7805      |        |
| A     | 1088.5129   | 25.2861  | 55.2972     | 0.1995      | 0.3326      |        |
| A     | 1062.7788   | 74.6337  | 49.1003     | 0.5739      | 0.7293      |        |
| A     | 1011.2884   | 152.8985 | 8.9009      | 0.7015      | 0.8246      |        |
| A     | 1005.6212   | 50.4969  | 5.9015      | 0.2263      | 0.3691      |        |
| A     | 997.3338    | 0.8756   | 20.4946     | 0.2908      | 0.4506      |        |
| A     | 929.9379    | 41.3890  | 2.7041      | 0.6897      | 0.8163      |        |
| A     | 911.1580    | 30.5961  | 32.7980     | 0.3066      | 0.4693      |        |
| A     | 891.3547    | 38.3976  | 4.9049      | 0.5099      | 0.6754      |        |
| A     | 848.2931    | 105.5063 | 18.0007     | 0.4091      | 0.5806      |        |
| A     | 760.4395    | 8.7112   | 5.5397      | 0.3889      | 0.5600      |        |
| A     | 720.1098    | 29.0447  | 5.4626      | 0.6763      | 0.8069      |        |
| A     | 687.0222    | 118.5232 | 5.6970      | 0.2704      | 0.4256      |        |
| A     | 651.0778    | 83.2494  | 8.1321      | 0.2596      | 0.4122      |        |
| A     | 602.3950    | 11.0820  | 4.3452      | 0.2515      | 0.4019      |        |

|   |          |         |        |        |        |
|---|----------|---------|--------|--------|--------|
| A | 554.3583 | 7.4951  | 3.7454 | 0.5758 | 0.7308 |
| A | 513.7442 | 18.2551 | 5.0225 | 0.5636 | 0.7209 |
| A | 477.7625 | 4.5317  | 1.8191 | 0.7384 | 0.8495 |
| A | 461.4944 | 2.5688  | 0.7067 | 0.2553 | 0.4068 |
| A | 454.8303 | 1.1881  | 0.2427 | 0.6965 | 0.8211 |
| A | 447.9324 | 1.5523  | 7.3544 | 0.4623 | 0.6323 |
| A | 334.7997 | 0.6505  | 2.1226 | 0.7177 | 0.8356 |
| A | 297.4070 | 2.0501  | 3.6391 | 0.6953 | 0.8202 |
| A | 273.6818 | 0.0916  | 8.3843 | 0.2048 | 0.3400 |
| A | 194.0845 | 0.0690  | 1.4565 | 0.1944 | 0.3255 |
| A | 167.8638 | 0.0837  | 3.4000 | 0.3122 | 0.4758 |
| A | 148.5397 | 1.0000  | 1.2918 | 0.7088 | 0.8296 |
| A | 144.0442 | 0.6886  | 0.7556 | 0.3110 | 0.4745 |
| A | 85.4466  | 0.2247  | 0.0991 | 0.6962 | 0.8209 |
| A | 71.1246  | 5.1933  | 1.4879 | 0.5743 | 0.7296 |
| A | 58.6690  | 5.2459  | 1.3468 | 0.7448 | 0.8537 |
| A | 37.3040  | 2.1665  | 0.1822 | 0.3771 | 0.5476 |

SM for 4,5-Au-PH3 complex of hexa-4,5-dienoic acid carboxylate:

Processing auphexdienoat5sm16psdm6.log  
PG=C01

|        |          |                 |
|--------|----------|-----------------|
| Method | BasisSet | Imaginary Freqs |
| RM06   | GenECP   | 0               |

HF Energy  
-861.9071454

|    | ZPE       | E298      | S298      | Squasihar | Equasihar | Strans | Srot   |
|----|-----------|-----------|-----------|-----------|-----------|--------|--------|
|    | 90.26472  | 98.690    | 121.329   | 114.564   | 98.725    | 43.383 | 31.379 |
| 20 |           |           |           |           |           |        |        |
| C  | -1.882675 | 2.836334  | 0.469862  |           |           |        |        |
| C  | -0.848367 | 2.148273  | 0.042512  |           |           |        |        |
| Au | -0.559473 | -0.054917 | -0.123181 |           |           |        |        |
| P  | -1.580527 | -2.206184 | 0.204937  |           |           |        |        |
| C  | 0.414935  | 1.868522  | -0.406099 |           |           |        |        |
| C  | 1.677671  | 1.780857  | 0.425665  |           |           |        |        |
| C  | 2.715512  | 0.800119  | -0.126873 |           |           |        |        |
| C  | 2.541715  | -0.721945 | 0.078005  |           |           |        |        |
| O  | 1.359564  | -1.244553 | 0.011095  |           |           |        |        |
| O  | 3.569026  | -1.369524 | 0.249900  |           |           |        |        |
| H  | -1.164859 | -3.133040 | -0.768478 |           |           |        |        |
| H  | -1.108982 | -2.852064 | 1.361961  |           |           |        |        |
| H  | -2.951724 | -2.527261 | 0.280957  |           |           |        |        |
| H  | -2.825918 | 2.368881  | 0.735726  |           |           |        |        |

|   |           |          |           |
|---|-----------|----------|-----------|
| H | -1.812626 | 3.920310 | 0.566642  |
| H | 0.574066  | 1.948015 | -1.488655 |
| H | 2.121841  | 2.789150 | 0.429070  |
| H | 1.425838  | 1.553659 | 1.470107  |
| H | 2.811721  | 0.959859 | -1.212863 |
| H | 3.695424  | 1.043339 | 0.296364  |

WARNING: Geometry optimization converged in opt job, but not in freq job

Population analysis using the SCF density.

| Label | Frequencies | IR Inten | Raman Activ | Depolar (P) | Depolar (U) | Dipole |
|-------|-------------|----------|-------------|-------------|-------------|--------|
| A     | 3232.1897   | 0.2163   | 121.8022    | 0.7475      | 0.8555      | 8.9876 |
| A     | 3127.6293   | 5.8176   | 461.0447    | 0.2210      | 0.3619      |        |
| A     | 3111.8997   | 13.4333  | 111.9038    | 0.3852      | 0.5562      |        |
| A     | 3091.9472   | 3.2889   | 62.3702     | 0.1924      | 0.3227      |        |
| A     | 3076.5674   | 7.7107   | 70.1031     | 0.7226      | 0.8390      |        |
| A     | 3020.2000   | 17.8745  | 120.7859    | 0.1061      | 0.1918      |        |
| A     | 3007.7626   | 23.7520  | 221.8516    | 0.1889      | 0.3178      |        |
| A     | 2524.1708   | 8.0585   | 108.4051    | 0.7148      | 0.8337      |        |
| A     | 2516.0817   | 12.7340  | 159.7914    | 0.4500      | 0.6207      |        |
| A     | 2489.9213   | 81.6254  | 518.9534    | 0.1471      | 0.2564      |        |
| A     | 1906.4375   | 26.6128  | 20.3051     | 0.7398      | 0.8504      |        |
| A     | 1758.4853   | 776.4806 | 41.8283     | 0.5184      | 0.6828      |        |
| A     | 1441.9645   | 10.0142  | 11.8709     | 0.6170      | 0.7631      |        |
| A     | 1437.2667   | 7.6039   | 14.2435     | 0.7340      | 0.8466      |        |
| A     | 1429.8560   | 5.1318   | 13.9223     | 0.7417      | 0.8517      |        |
| A     | 1380.8309   | 360.5586 | 13.5950     | 0.1987      | 0.3315      |        |
| A     | 1361.5240   | 1.4728   | 18.2949     | 0.2361      | 0.3821      |        |
| A     | 1322.3251   | 8.9095   | 7.3867      | 0.1708      | 0.2917      |        |
| A     | 1294.6726   | 5.3456   | 5.6697      | 0.5759      | 0.7309      |        |
| A     | 1220.6202   | 21.9592  | 9.4151      | 0.1806      | 0.3059      |        |
| A     | 1174.6017   | 0.9370   | 6.8635      | 0.2666      | 0.4210      |        |
| A     | 1126.5240   | 5.5217   | 15.7372     | 0.7447      | 0.8537      |        |
| A     | 1117.3100   | 16.7259  | 18.8424     | 0.6394      | 0.7801      |        |
| A     | 1105.2688   | 4.1604   | 35.1197     | 0.1577      | 0.2724      |        |
| A     | 1062.2292   | 1.5648   | 2.2691      | 0.4555      | 0.6259      |        |
| A     | 1029.2572   | 9.5124   | 29.4835     | 0.0996      | 0.1812      |        |
| A     | 998.0548    | 116.7587 | 5.5614      | 0.6122      | 0.7594      |        |
| A     | 988.8357    | 57.6557  | 1.0206      | 0.6876      | 0.8149      |        |
| A     | 962.4432    | 33.8345  | 30.8545     | 0.7177      | 0.8357      |        |
| A     | 917.5301    | 3.6674   | 5.6255      | 0.5248      | 0.6883      |        |
| A     | 891.8267    | 51.4841  | 1.6243      | 0.6007      | 0.7505      |        |
| A     | 863.2546    | 6.4171   | 13.8004     | 0.2354      | 0.3811      |        |
| A     | 836.2782    | 34.1769  | 5.0399      | 0.7470      | 0.8552      |        |
| A     | 694.4806    | 5.5372   | 10.3143     | 0.2167      | 0.3562      |        |
| A     | 624.5569    | 10.0907  | 8.3065      | 0.5244      | 0.6880      |        |
| A     | 575.5246    | 3.8077   | 5.6621      | 0.1195      | 0.2134      |        |

|   |          |         |         |        |        |
|---|----------|---------|---------|--------|--------|
| A | 522.2934 | 9.2969  | 9.7897  | 0.2278 | 0.3711 |
| A | 462.5688 | 5.0361  | 11.7060 | 0.7490 | 0.8565 |
| A | 444.7011 | 4.2218  | 19.4324 | 0.4153 | 0.5869 |
| A | 433.0874 | 1.8656  | 5.5981  | 0.6835 | 0.8120 |
| A | 407.6151 | 0.2377  | 1.6779  | 0.5411 | 0.7023 |
| A | 333.4256 | 0.6882  | 5.6249  | 0.6633 | 0.7976 |
| A | 312.4548 | 7.9087  | 3.3095  | 0.7490 | 0.8565 |
| A | 282.5798 | 42.7280 | 10.2048 | 0.2934 | 0.4537 |
| A | 261.8809 | 7.4924  | 0.9567  | 0.6170 | 0.7631 |
| A | 239.8728 | 15.4844 | 5.3010  | 0.5758 | 0.7308 |
| A | 181.9987 | 3.4239  | 10.3280 | 0.6103 | 0.7580 |
| A | 154.1492 | 8.7661  | 6.5701  | 0.7499 | 0.8571 |
| A | 103.5728 | 6.4219  | 0.6375  | 0.2932 | 0.4534 |
| A | 81.0598  | 0.1405  | 0.7736  | 0.7480 | 0.8558 |
| A | 77.1599  | 0.6201  | 1.8921  | 0.7484 | 0.8561 |
| A | 59.1677  | 7.8724  | 0.1877  | 0.5239 | 0.6876 |
| A | 42.8518  | 3.9163  | 2.7226  | 0.7499 | 0.8571 |
| A | 20.3250  | 3.3310  | 0.7708  | 0.7280 | 0.8426 |

Processing auphexdienoat5sm16psd1pbedcms.log  
PG=C01

Method BasisSet Imaginary Freqs  
RPBE1PBE GenECP 0

HF Energy  
-861.6008562

| ZPE      | E298   | S298    | Squasihar | Equasihar | Strans | Srot   |
|----------|--------|---------|-----------|-----------|--------|--------|
| 90.91166 | 99.442 | 122.369 | 117.260   | 99.478    | 43.383 | 32.291 |

20

|    |           |           |           |
|----|-----------|-----------|-----------|
| C  | -1.091893 | 3.046052  | 0.526344  |
| C  | -0.339132 | 2.124436  | -0.027659 |
| Au | -1.004332 | -0.006543 | -0.060624 |
| P  | -2.271157 | -1.925765 | 0.210955  |
| C  | 0.661202  | 1.461848  | -0.653302 |
| C  | 1.971590  | 1.080070  | -0.015439 |
| C  | 2.417949  | -0.335839 | -0.353986 |
| C  | 3.849607  | -0.686608 | 0.107165  |
| O  | 4.583171  | 0.259949  | 0.489887  |
| O  | 4.151713  | -1.906331 | 0.034321  |
| H  | -2.704822 | -2.550165 | -0.969948 |
| H  | -1.650066 | -2.979800 | 0.900742  |
| H  | -3.470848 | -1.766222 | 0.923866  |
| H  | -2.021578 | 2.818070  | 1.038802  |
| H  | -0.777517 | 4.088058  | 0.472241  |

|   |          |           |           |
|---|----------|-----------|-----------|
| H | 0.595404 | 1.364916  | -1.741205 |
| H | 2.717340 | 1.789573  | -0.398989 |
| H | 1.920684 | 1.229691  | 1.066741  |
| H | 1.725600 | -1.067781 | 0.081443  |
| H | 2.380374 | -0.491631 | -1.441135 |

Population analysis using the SCF density.

| Label | Frequencies | IR Inten | Raman Activ | Depolar (P) | Depolar (U) | Dipole  |
|-------|-------------|----------|-------------|-------------|-------------|---------|
| A     | 3269.6870   | 5.5190   | 224.8340    | 0.7470      | 0.8552      | 26.7821 |
| A     | 3168.5226   | 7.6058   | 738.9494    | 0.1723      | 0.2939      |         |
| A     | 3152.3805   | 4.2808   | 144.6856    | 0.2472      | 0.3965      |         |
| A     | 3139.5325   | 18.9852  | 192.6335    | 0.5858      | 0.7388      |         |
| A     | 3097.4806   | 31.8199  | 188.4227    | 0.7483      | 0.8560      |         |
| A     | 3069.3260   | 12.8485  | 519.9970    | 0.1607      | 0.2769      |         |
| A     | 3051.0777   | 32.6824  | 357.9848    | 0.0445      | 0.0853      |         |
| A     | 2564.2703   | 0.2023   | 299.3238    | 0.7487      | 0.8563      |         |
| A     | 2563.2432   | 0.2382   | 313.8473    | 0.7490      | 0.8565      |         |
| A     | 2541.3102   | 10.7741  | 850.8062    | 0.0145      | 0.0287      |         |
| A     | 1953.7734   | 106.2777 | 76.2500     | 0.7274      | 0.8422      |         |
| A     | 1672.5132   | 989.7866 | 28.2502     | 0.6338      | 0.7758      |         |
| A     | 1454.4429   | 25.0006  | 46.5407     | 0.6145      | 0.7612      |         |
| A     | 1450.0091   | 29.9876  | 16.3066     | 0.7377      | 0.8490      |         |
| A     | 1436.2964   | 13.5035  | 24.9010     | 0.7222      | 0.8387      |         |
| A     | 1414.9944   | 495.2517 | 118.8526    | 0.6189      | 0.7646      |         |
| A     | 1377.8080   | 2.5054   | 25.2035     | 0.1668      | 0.2860      |         |
| A     | 1324.9714   | 14.1306  | 12.3515     | 0.1038      | 0.1881      |         |
| A     | 1282.7875   | 3.5117   | 28.8394     | 0.5137      | 0.6787      |         |
| A     | 1224.4118   | 2.6374   | 26.1717     | 0.5277      | 0.6909      |         |
| A     | 1169.7696   | 5.2944   | 61.1962     | 0.1734      | 0.2956      |         |
| A     | 1117.8224   | 9.4654   | 130.2404    | 0.1312      | 0.2319      |         |
| A     | 1114.1753   | 8.5597   | 43.0341     | 0.7447      | 0.8537      |         |
| A     | 1113.6282   | 8.9852   | 43.9934     | 0.7374      | 0.8489      |         |
| A     | 1084.6815   | 1.0756   | 5.2450      | 0.6906      | 0.8170      |         |
| A     | 1056.6144   | 6.1340   | 67.7932     | 0.1139      | 0.2044      |         |
| A     | 1005.8357   | 15.8855  | 16.4403     | 0.2353      | 0.3810      |         |
| A     | 969.9024    | 228.4597 | 21.9261     | 0.7499      | 0.8571      |         |
| A     | 958.5172    | 11.3832  | 54.0235     | 0.2986      | 0.4599      |         |
| A     | 926.7493    | 41.5281  | 30.8098     | 0.3935      | 0.5648      |         |
| A     | 911.6858    | 76.9934  | 22.6568     | 0.4002      | 0.5716      |         |
| A     | 905.4931    | 56.8781  | 8.7452      | 0.6505      | 0.7882      |         |
| A     | 793.2422    | 34.5334  | 2.7916      | 0.5091      | 0.6747      |         |
| A     | 685.0341    | 25.3467  | 3.0330      | 0.4662      | 0.6360      |         |
| A     | 612.8098    | 33.9319  | 28.5343     | 0.2327      | 0.3776      |         |
| A     | 588.7978    | 5.0235   | 3.0157      | 0.2441      | 0.3925      |         |
| A     | 549.8277    | 22.5205  | 5.3255      | 0.5403      | 0.7015      |         |
| A     | 498.3539    | 1.2591   | 0.8196      | 0.7421      | 0.8520      |         |
| A     | 488.9136    | 2.1172   | 2.1758      | 0.6326      | 0.7750      |         |

|   |          |         |         |        |        |
|---|----------|---------|---------|--------|--------|
| A | 458.0702 | 3.5804  | 5.5531  | 0.1663 | 0.2851 |
| A | 390.8954 | 16.0479 | 41.5276 | 0.3361 | 0.5031 |
| A | 347.4695 | 10.2256 | 4.7863  | 0.2673 | 0.4218 |
| A | 297.9683 | 16.2386 | 23.5224 | 0.3348 | 0.5016 |
| A | 266.6874 | 35.7858 | 20.6436 | 0.6392 | 0.7799 |
| A | 249.2294 | 3.8687  | 9.3461  | 0.5861 | 0.7391 |
| A | 174.6054 | 1.8881  | 8.5906  | 0.6661 | 0.7996 |
| A | 146.4982 | 5.9807  | 3.8696  | 0.7237 | 0.8397 |
| A | 96.6830  | 6.9095  | 2.3762  | 0.6218 | 0.7668 |
| A | 89.5883  | 0.0878  | 0.8418  | 0.5714 | 0.7272 |
| A | 83.5818  | 0.2360  | 1.6355  | 0.7213 | 0.8381 |
| A | 77.7588  | 9.4864  | 4.9699  | 0.7356 | 0.8477 |
| A | 60.5829  | 0.9630  | 3.8679  | 0.7479 | 0.8558 |
| A | 48.2117  | 2.3506  | 2.8377  | 0.6746 | 0.8057 |
| A | 45.1057  | 17.1135 | 1.8417  | 0.7309 | 0.8445 |

5-exo-trig prod2 for 4,5-Au-PH3 complex of hexa-4,5-dienoic acid carboxylate:

Processing auphexdienoat5prod26psdm6.log  
PG=C01

|        |          |                 |
|--------|----------|-----------------|
| Method | BasisSet | Imaginary Freqs |
| RM06   | GenECP   | 0               |

HF Energy  
-861.9544438

|    | ZPE       | E298      | S298      | Squasihar | Equasihar | Strans | Srot   |
|----|-----------|-----------|-----------|-----------|-----------|--------|--------|
|    | 92.72362  | 100.427   | 115.581   | 110.506   | 100.459   | 43.383 | 31.640 |
| 20 |           |           |           |           |           |        |        |
| C  | -1.221765 | 1.855685  | -0.499799 |           |           |        |        |
| C  | -0.813654 | 0.717583  | 0.076757  |           |           |        |        |
| C  | -1.769861 | -0.180491 | 0.814798  |           |           |        |        |
| C  | -1.987289 | -1.535539 | 0.123399  |           |           |        |        |
| C  | -3.145313 | -1.223749 | -0.809624 |           |           |        |        |
| C  | -3.899929 | -0.139393 | -0.072571 |           |           |        |        |
| O  | -5.024469 | 0.245642  | -0.259526 |           |           |        |        |
| Au | 1.162706  | 0.127541  | 0.008506  |           |           |        |        |
| P  | 3.468373  | -0.493969 | -0.081765 |           |           |        |        |
| O  | -3.102499 | 0.379880  | 0.888186  |           |           |        |        |
| H  | 4.186400  | -0.626778 | 1.124798  |           |           |        |        |
| H  | 3.824639  | -1.720949 | -0.679051 |           |           |        |        |
| H  | 4.362978  | 0.348891  | -0.772798 |           |           |        |        |
| H  | -0.535459 | 2.500774  | -1.044841 |           |           |        |        |
| H  | -2.256950 | 2.198183  | -0.433823 |           |           |        |        |
| H  | -1.440555 | -0.299250 | 1.854948  |           |           |        |        |

H -1.082897 -1.883790 -0.384938  
H -2.282437 -2.291247 0.861839  
H -3.809944 -2.061040 -1.035783  
H -2.802557 -0.799775 -1.762866

Population analysis using the SCF density.

| Label | Frequencies | IR Inten | Dipole  |
|-------|-------------|----------|---------|
| A     | 3205.7582   | 6.3484   | 10.7466 |
| A     | 3140.6344   | 9.4845   |         |
| A     | 3122.1823   | 17.8521  |         |
| A     | 3110.6982   | 15.5517  |         |
| A     | 3063.7377   | 33.1192  |         |
| A     | 3062.7771   | 3.2706   |         |
| A     | 3051.5855   | 16.1947  |         |
| A     | 2502.7090   | 17.9787  |         |
| A     | 2500.9398   | 16.6942  |         |
| A     | 2487.4394   | 89.4433  |         |
| A     | 1893.4145   | 565.7813 |         |
| A     | 1665.0325   | 11.0522  |         |
| A     | 1464.3112   | 11.2074  |         |
| A     | 1429.7927   | 11.0758  |         |
| A     | 1410.3811   | 16.1874  |         |
| A     | 1363.8244   | 39.2590  |         |
| A     | 1331.3140   | 27.7249  |         |
| A     | 1300.9247   | 1.3396   |         |
| A     | 1285.4646   | 64.1110  |         |
| A     | 1215.2933   | 43.0942  |         |
| A     | 1193.3159   | 184.3255 |         |
| A     | 1156.5698   | 5.2501   |         |
| A     | 1133.7052   | 5.9005   |         |
| A     | 1130.9940   | 8.2738   |         |
| A     | 1130.1834   | 3.9585   |         |
| A     | 1069.7615   | 87.7417  |         |
| A     | 1053.4433   | 2.9150   |         |
| A     | 1016.8260   | 169.6406 |         |
| A     | 1002.7108   | 84.6267  |         |
| A     | 978.2818    | 34.1051  |         |
| A     | 930.2830    | 38.6061  |         |
| A     | 910.0515    | 11.4386  |         |
| A     | 876.1902    | 14.9883  |         |
| A     | 813.3404    | 3.0681   |         |
| A     | 788.1168    | 4.8583   |         |
| A     | 702.7990    | 2.0560   |         |
| A     | 663.6029    | 12.5554  |         |
| A     | 620.4476    | 2.9179   |         |
| A     | 543.4201    | 3.0985   |         |
| A     | 504.1926    | 1.5873   |         |



|   |          |        |
|---|----------|--------|
| A | 476.9567 | 9.9934 |
| A | 425.2143 | 0.9480 |
| A | 412.5612 | 3.8215 |
| A | 332.8095 | 2.8439 |
| A | 283.7954 | 4.8802 |
| A | 255.2128 | 0.6737 |
| A | 246.3160 | 3.9276 |
| A | 161.9096 | 3.2105 |
| A | 127.4651 | 2.5124 |
| A | 88.7644  | 3.1081 |
| A | 73.1448  | 3.1137 |
| A | 64.0931  | 0.1039 |
| A | 50.2156  | 0.5397 |
| A | 36.2054  | 0.1743 |

Processing auphexdienoat5prod26psd1pbedcms.log  
PG=C01

| Method   | BasisSet | Imaginary Freqs |
|----------|----------|-----------------|
| RPBE1PBE | GenECP   | 0               |

HF Energy  
-861.6480843

|    | ZPE       | E298      | S298      | Squasihar | Equasihar | Strans | Srot   |
|----|-----------|-----------|-----------|-----------|-----------|--------|--------|
|    | 93.52771  | 101.154   | 115.358   | 110.164   | 101.186   | 43.383 | 31.643 |
| 20 |           |           |           |           |           |        |        |
| C  | 1.208436  | -1.882418 | -0.513725 |           |           |        |        |
| C  | 0.784098  | -0.738367 | 0.050985  |           |           |        |        |
| C  | 1.745643  | 0.167520  | 0.778200  |           |           |        |        |
| C  | 1.973664  | 1.524326  | 0.086604  |           |           |        |        |
| C  | 3.185321  | 1.245302  | -0.791766 |           |           |        |        |
| C  | 3.907320  | 0.152209  | -0.044194 |           |           |        |        |
| O  | 5.050147  | -0.227804 | -0.184219 |           |           |        |        |
| Au | -1.175210 | -0.132252 | 0.001539  |           |           |        |        |
| P  | -3.414572 | 0.527162  | -0.048349 |           |           |        |        |
| O  | 3.087556  | -0.399265 | 0.864654  |           |           |        |        |
| H  | -4.046905 | 0.784364  | 1.183170  |           |           |        |        |
| H  | -3.735253 | 1.707770  | -0.745691 |           |           |        |        |
| H  | -4.340334 | -0.363471 | -0.624800 |           |           |        |        |
| H  | 0.527736  | -2.541894 | -1.048057 |           |           |        |        |
| H  | 2.247702  | -2.211524 | -0.455556 |           |           |        |        |
| H  | 1.421287  | 0.293049  | 1.815510  |           |           |        |        |
| H  | 1.090569  | 1.846024  | -0.468755 |           |           |        |        |
| H  | 2.213851  | 2.287422  | 0.833952  |           |           |        |        |
| H  | 3.846884  | 2.099064  | -0.952123 |           |           |        |        |

H 2.906158 0.844812 -1.774124

Population analysis using the SCF density.

| Label | Frequencies | IR Inten | Raman Activ | Depolar (P) | Depolar (U) | Dipole  |
|-------|-------------|----------|-------------|-------------|-------------|---------|
| A     | 3227.1692   | 13.0896  | 232.5687    | 0.7460      | 0.8545      | 13.9206 |
| A     | 3173.1317   | 12.6264  | 180.4808    | 0.5477      | 0.7077      |         |
| A     | 3165.7099   | 11.1925  | 178.9603    | 0.4459      | 0.6168      |         |
| A     | 3137.3490   | 33.8564  | 445.0182    | 0.1703      | 0.2911      |         |
| A     | 3120.9737   | 30.1010  | 305.1169    | 0.2247      | 0.3670      |         |
| A     | 3096.4411   | 29.1851  | 129.1162    | 0.3336      | 0.5003      |         |
| A     | 3092.0951   | 4.6674   | 306.7928    | 0.0634      | 0.1193      |         |
| A     | 2534.1525   | 7.0877   | 329.9258    | 0.7482      | 0.8560      |         |
| A     | 2532.7638   | 7.7119   | 337.2817    | 0.7424      | 0.8522      |         |
| A     | 2516.9863   | 49.7341  | 1024.1456   | 0.0335      | 0.0648      |         |
| A     | 1831.6207   | 815.8663 | 28.4750     | 0.4184      | 0.5900      |         |
| A     | 1660.3344   | 23.2102  | 104.9195    | 0.1303      | 0.2306      |         |
| A     | 1477.4569   | 13.1080  | 13.4872     | 0.7500      | 0.8571      |         |
| A     | 1436.6195   | 16.3089  | 16.2202     | 0.7499      | 0.8571      |         |
| A     | 1427.7983   | 14.2888  | 72.8060     | 0.4390      | 0.6101      |         |
| A     | 1387.4344   | 80.9908  | 14.9563     | 0.3681      | 0.5381      |         |
| A     | 1347.4403   | 33.5979  | 8.0343      | 0.4449      | 0.6158      |         |
| A     | 1318.7248   | 2.9577   | 10.4142     | 0.6718      | 0.8037      |         |
| A     | 1297.5822   | 97.3303  | 6.8299      | 0.7064      | 0.8280      |         |
| A     | 1226.8238   | 34.2387  | 24.2387     | 0.7214      | 0.8382      |         |
| A     | 1214.1386   | 317.0866 | 7.9947      | 0.5486      | 0.7085      |         |
| A     | 1169.0779   | 6.9416   | 11.4060     | 0.2726      | 0.4284      |         |
| A     | 1145.3909   | 6.4839   | 21.1011     | 0.1548      | 0.2681      |         |
| A     | 1119.2962   | 9.2712   | 44.3097     | 0.7500      | 0.8571      |         |
| A     | 1119.0292   | 9.6266   | 44.7826     | 0.7489      | 0.8564      |         |
| A     | 1067.5476   | 60.7252  | 17.7255     | 0.6641      | 0.7981      |         |
| A     | 1061.1076   | 30.0636  | 7.1999      | 0.3689      | 0.5390      |         |
| A     | 998.1477    | 64.7270  | 8.7741      | 0.6017      | 0.7513      |         |
| A     | 991.4986    | 128.0954 | 59.8981     | 0.7182      | 0.8360      |         |
| A     | 982.8988    | 239.4024 | 9.6991      | 0.5899      | 0.7421      |         |
| A     | 925.0974    | 91.2494  | 11.1399     | 0.6883      | 0.8154      |         |
| A     | 922.4229    | 6.2094   | 6.8889      | 0.5439      | 0.7046      |         |
| A     | 876.8325    | 11.0565  | 32.8951     | 0.0760      | 0.1412      |         |
| A     | 815.1693    | 12.1757  | 10.2199     | 0.0754      | 0.1403      |         |
| A     | 795.6681    | 11.5484  | 6.6969      | 0.4210      | 0.5926      |         |
| A     | 705.1410    | 6.7446   | 22.2295     | 0.0916      | 0.1678      |         |
| A     | 663.4586    | 20.9909  | 5.8925      | 0.4545      | 0.6250      |         |
| A     | 627.8234    | 5.9302   | 12.1809     | 0.1458      | 0.2545      |         |
| A     | 550.0816    | 5.3869   | 3.9858      | 0.7108      | 0.8309      |         |
| A     | 516.3314    | 5.3940   | 3.3292      | 0.7464      | 0.8548      |         |
| A     | 491.7652    | 17.7750  | 2.3561      | 0.1863      | 0.3141      |         |
| A     | 475.8566    | 0.7853   | 0.7081      | 0.5828      | 0.7364      |         |
| A     | 442.8281    | 12.5398  | 3.0377      | 0.2396      | 0.3866      |         |

|   |          |         |         |        |        |
|---|----------|---------|---------|--------|--------|
| A | 329.4643 | 5.2327  | 3.1996  | 0.0941 | 0.1720 |
| A | 295.1139 | 0.3507  | 10.2717 | 0.0966 | 0.1761 |
| A | 284.9537 | 10.7636 | 5.9963  | 0.3567 | 0.5258 |
| A | 243.9844 | 6.4728  | 3.4454  | 0.7097 | 0.8302 |
| A | 153.8199 | 3.4010  | 0.6325  | 0.7499 | 0.8571 |
| A | 117.9231 | 8.0189  | 2.5868  | 0.7446 | 0.8536 |
| A | 93.2940  | 2.4391  | 3.6347  | 0.7214 | 0.8382 |
| A | 78.9975  | 4.4533  | 0.6497  | 0.7414 | 0.8515 |
| A | 58.7776  | 1.0597  | 0.8656  | 0.7262 | 0.8414 |
| A | 47.0290  | 0.0280  | 0.1298  | 0.7403 | 0.8507 |
| A | 35.0085  | 0.3559  | 0.6760  | 0.7441 | 0.8533 |

5-exo-trig prod1 for 4,5-Au-PH3 complex of hexa-4,5-dienoic acid carboxylate:

Processing auphexdienoat5prod6psdm6.log  
PG=C01

Method      BasisSet      Imaginary Freqs  
RM06      GenECP      0

HF Energy  
-861.9539096

|    | ZPE       | E298      | S298      | Squasihar | Equasihar | Strans | Srot   |
|----|-----------|-----------|-----------|-----------|-----------|--------|--------|
|    | 92.65412  | 100.388   | 115.408   | 111.305   | 100.414   | 43.383 | 31.798 |
| 20 |           |           |           |           |           |        |        |
| O  | -3.100640 | 0.636795  | 0.407059  |           |           |        |        |
| C  | -1.802556 | -0.008758 | 0.433738  |           |           |        |        |
| C  | -1.992997 | -1.257309 | -0.433980 |           |           |        |        |
| C  | -3.458616 | -1.586641 | -0.212167 |           |           |        |        |
| C  | -4.076199 | -0.235432 | 0.078094  |           |           |        |        |
| C  | -0.706927 | 0.900939  | -0.019870 |           |           |        |        |
| Au | 1.204937  | 0.128172  | 0.011985  |           |           |        |        |
| P  | 3.445354  | -0.700075 | 0.035053  |           |           |        |        |
| O  | -5.239921 | 0.069008  | 0.048515  |           |           |        |        |
| C  | -0.955719 | 2.151236  | -0.429437 |           |           |        |        |
| H  | 3.966252  | -1.231895 | 1.232852  |           |           |        |        |
| H  | 3.796611  | -1.751697 | -0.836603 |           |           |        |        |
| H  | 4.490966  | 0.193621  | -0.275360 |           |           |        |        |
| H  | -0.161858 | 2.809114  | -0.777591 |           |           |        |        |
| H  | -1.966284 | 2.563025  | -0.425392 |           |           |        |        |
| H  | -1.627331 | -0.304263 | 1.482816  |           |           |        |        |
| H  | -1.804062 | -0.991595 | -1.482751 |           |           |        |        |
| H  | -1.298031 | -2.056901 | -0.157461 |           |           |        |        |
| H  | -3.971294 | -2.066102 | -1.049712 |           |           |        |        |
| H  | -3.612720 | -2.218374 | 0.673730  |           |           |        |        |

Population analysis using the SCF density.

| Label | Frequencies | IR Inten | Raman Activ | Depolar (P) | Depolar (U) | Dipole  |
|-------|-------------|----------|-------------|-------------|-------------|---------|
| A     | 3210.4351   | 5.9036   | 106.8616    | 0.7199      | 0.8372      | 10.7290 |
| A     | 3138.6438   | 7.5476   | 91.3022     | 0.4869      | 0.6549      |         |
| A     | 3118.4050   | 26.9654  | 10.6444     | 0.2783      | 0.4355      |         |
| A     | 3117.9172   | 3.0456   | 219.2260    | 0.2001      | 0.3334      |         |
| A     | 3052.4894   | 22.9357  | 40.3130     | 0.4019      | 0.5734      |         |
| A     | 3048.4822   | 6.6433   | 134.6347    | 0.0452      | 0.0864      |         |
| A     | 2990.7020   | 24.6750  | 96.2411     | 0.2311      | 0.3755      |         |
| A     | 2505.1179   | 16.2899  | 138.5689    | 0.7496      | 0.8569      |         |
| A     | 2501.2892   | 20.4461  | 155.2587    | 0.5990      | 0.7492      |         |
| A     | 2488.5503   | 88.4167  | 543.6085    | 0.0776      | 0.1441      |         |
| A     | 1894.3668   | 599.2847 | 13.5505     | 0.5050      | 0.6711      |         |
| A     | 1669.7012   | 12.0643  | 37.4288     | 0.1423      | 0.2492      |         |
| A     | 1462.8115   | 5.0535   | 3.5801      | 0.7269      | 0.8419      |         |
| A     | 1433.2574   | 8.4849   | 7.9701      | 0.7254      | 0.8409      |         |
| A     | 1411.8463   | 22.7916  | 27.3313     | 0.4518      | 0.6224      |         |
| A     | 1363.8440   | 3.2735   | 11.1188     | 0.4421      | 0.6131      |         |
| A     | 1339.4048   | 53.0193  | 10.0256     | 0.4519      | 0.6225      |         |
| A     | 1305.1389   | 86.1372  | 2.8528      | 0.3016      | 0.4634      |         |
| A     | 1285.4446   | 17.7657  | 0.7721      | 0.6015      | 0.7512      |         |
| A     | 1234.1675   | 74.7109  | 9.9619      | 0.5072      | 0.6730      |         |
| A     | 1209.1811   | 156.1426 | 4.9896      | 0.7369      | 0.8485      |         |
| A     | 1161.6102   | 16.3157  | 34.6379     | 0.2297      | 0.3736      |         |
| A     | 1148.0782   | 43.2294  | 6.9374      | 0.6816      | 0.8107      |         |
| A     | 1133.9468   | 4.2623   | 18.2353     | 0.7498      | 0.8570      |         |
| A     | 1130.7146   | 4.3586   | 18.3011     | 0.7482      | 0.8560      |         |
| A     | 1079.4803   | 29.6694  | 2.9265      | 0.7044      | 0.8266      |         |
| A     | 1055.7192   | 63.1808  | 6.6850      | 0.5236      | 0.6874      |         |
| A     | 1022.6243   | 56.5372  | 15.4155     | 0.7497      | 0.8570      |         |
| A     | 1011.8322   | 225.4915 | 12.4658     | 0.5301      | 0.6929      |         |
| A     | 999.5197    | 12.4765  | 7.1413      | 0.4317      | 0.6031      |         |
| A     | 935.4329    | 40.1324  | 2.3416      | 0.1637      | 0.2814      |         |
| A     | 928.2586    | 37.8637  | 2.0977      | 0.7214      | 0.8382      |         |
| A     | 868.0639    | 3.4859   | 9.9440      | 0.1074      | 0.1939      |         |
| A     | 820.4972    | 5.2947   | 9.5317      | 0.0956      | 0.1745      |         |
| A     | 738.1555    | 2.3527   | 5.7614      | 0.5268      | 0.6901      |         |
| A     | 686.9094    | 8.5406   | 13.3296     | 0.1500      | 0.2609      |         |
| A     | 651.6912    | 6.0331   | 2.2204      | 0.2918      | 0.4517      |         |
| A     | 612.0266    | 3.7510   | 1.6624      | 0.0721      | 0.1345      |         |
| A     | 526.4372    | 1.2731   | 1.8339      | 0.7353      | 0.8475      |         |
| A     | 519.2501    | 8.6382   | 0.5877      | 0.4521      | 0.6227      |         |
| A     | 478.4713    | 7.6196   | 6.4121      | 0.1458      | 0.2545      |         |
| A     | 432.7386    | 0.7663   | 0.4998      | 0.7326      | 0.8456      |         |
| A     | 418.4415    | 3.7125   | 2.1417      | 0.1362      | 0.2398      |         |
| A     | 299.2356    | 2.8218   | 3.2893      | 0.2881      | 0.4473      |         |

|   |          |        |        |        |        |
|---|----------|--------|--------|--------|--------|
| A | 279.7650 | 3.9663 | 0.9421 | 0.6778 | 0.8080 |
| A | 253.6710 | 0.1048 | 9.4243 | 0.1828 | 0.3091 |
| A | 208.0201 | 6.6726 | 2.1665 | 0.4668 | 0.6365 |
| A | 157.3444 | 1.1233 | 0.4858 | 0.7462 | 0.8547 |
| A | 123.0561 | 1.0148 | 0.5682 | 0.5439 | 0.7046 |
| A | 95.9224  | 1.6318 | 1.7603 | 0.7318 | 0.8452 |
| A | 90.4832  | 0.0126 | 0.0767 | 0.7496 | 0.8569 |
| A | 76.3315  | 4.2521 | 0.7180 | 0.7357 | 0.8478 |
| A | 50.3173  | 0.8225 | 1.4109 | 0.7499 | 0.8571 |
| A | 37.2597  | 0.8513 | 0.4736 | 0.7387 | 0.8497 |

Processing auphexdienoat5prod6psd1pbedcms.log  
PG=C01

Method BasisSet Imaginary Freqs  
RPBE1PBE GenECP 0

HF Energy  
-861.6485977

|    | ZPE       | E298      | S298      | Squasihar | Equasihar | Strans | Srot   |
|----|-----------|-----------|-----------|-----------|-----------|--------|--------|
|    | 93.41804  | 101.130   | 117.248   | 110.647   | 101.165   | 43.383 | 31.789 |
| 20 |           |           |           |           |           |        |        |
| O  | 3.092069  | 0.629403  | -0.422706 |           |           |        |        |
| C  | 1.780019  | -0.015976 | -0.426228 |           |           |        |        |
| C  | 1.983373  | -1.264138 | 0.444162  |           |           |        |        |
| C  | 3.455492  | -1.584634 | 0.228169  |           |           |        |        |
| C  | 4.057803  | -0.237527 | -0.085412 |           |           |        |        |
| C  | 0.688096  | 0.903221  | 0.030810  |           |           |        |        |
| Au | -1.212029 | 0.131391  | -0.009929 |           |           |        |        |
| P  | -3.387765 | -0.712976 | -0.046605 |           |           |        |        |
| O  | 5.227107  | 0.083441  | -0.071515 |           |           |        |        |
| C  | 0.962771  | 2.155083  | 0.436983  |           |           |        |        |
| H  | -3.953381 | -1.015960 | -1.299893 |           |           |        |        |
| H  | -3.632939 | -1.919239 | 0.637185  |           |           |        |        |
| H  | -4.403551 | 0.094920  | 0.498998  |           |           |        |        |
| H  | 0.181019  | 2.827208  | 0.784486  |           |           |        |        |
| H  | 1.978248  | 2.554299  | 0.435591  |           |           |        |        |
| H  | 1.600302  | -0.311973 | -1.468915 |           |           |        |        |
| H  | 1.793676  | -1.011649 | 1.492981  |           |           |        |        |
| H  | 1.306063  | -2.070557 | 0.155179  |           |           |        |        |
| H  | 3.962592  | -2.044795 | 1.078648  |           |           |        |        |
| H  | 3.615957  | -2.226393 | -0.647913 |           |           |        |        |

Population analysis using the SCF density.

| Label | Frequencies | IR Inten | Raman Activ | Depolar (P) | Depolar (U) | Dipole |
|-------|-------------|----------|-------------|-------------|-------------|--------|
|-------|-------------|----------|-------------|-------------|-------------|--------|

|   |           |          |           |        |        |         |
|---|-----------|----------|-----------|--------|--------|---------|
| A | 3229.6671 | 13.2263  | 247.8344  | 0.7382 | 0.8494 | 13.9821 |
| A | 3170.2239 | 14.0704  | 159.0020  | 0.7225 | 0.8389 |         |
| A | 3164.1786 | 8.5101   | 182.3972  | 0.2733 | 0.4293 |         |
| A | 3140.9830 | 33.4510  | 424.4295  | 0.1828 | 0.3090 |         |
| A | 3096.4720 | 24.9929  | 127.3556  | 0.1185 | 0.2119 |         |
| A | 3083.5626 | 8.2521   | 281.5651  | 0.1062 | 0.1920 |         |
| A | 3065.1000 | 25.3281  | 312.6993  | 0.2289 | 0.3725 |         |
| A | 2534.3861 | 7.9286   | 336.3264  | 0.7233 | 0.8394 |         |
| A | 2532.5611 | 7.7109   | 331.2968  | 0.7435 | 0.8529 |         |
| A | 2516.9908 | 49.1813  | 1002.7798 | 0.0324 | 0.0627 |         |
| A | 1831.5334 | 815.5250 | 29.8342   | 0.4389 | 0.6101 |         |
| A | 1662.7981 | 26.2276  | 124.5085  | 0.1149 | 0.2062 |         |
| A | 1477.6213 | 7.8991   | 11.8177   | 0.7242 | 0.8400 |         |
| A | 1437.6121 | 14.3059  | 15.2890   | 0.7485 | 0.8562 |         |
| A | 1430.6252 | 20.7265  | 82.1178   | 0.4457 | 0.6166 |         |
| A | 1382.1940 | 17.7720  | 17.1339   | 0.3632 | 0.5328 |         |
| A | 1356.0674 | 59.3436  | 17.0805   | 0.6569 | 0.7929 |         |
| A | 1324.4334 | 128.0492 | 6.8513    | 0.3062 | 0.4688 |         |
| A | 1299.2156 | 17.0283  | 1.5173    | 0.7227 | 0.8390 |         |
| A | 1251.7346 | 144.4727 | 15.2504   | 0.5165 | 0.6811 |         |
| A | 1218.9999 | 222.7783 | 10.6042   | 0.7400 | 0.8506 |         |
| A | 1172.0927 | 19.2938  | 33.1547   | 0.1461 | 0.2550 |         |
| A | 1160.1681 | 46.8308  | 13.6078   | 0.6200 | 0.7654 |         |
| A | 1119.9662 | 9.4111   | 43.9400   | 0.7499 | 0.8571 |         |
| A | 1119.0989 | 9.3284   | 44.8747   | 0.7486 | 0.8562 |         |
| A | 1085.7246 | 9.3886   | 6.5152    | 0.7303 | 0.8441 |         |
| A | 1049.4990 | 56.4258  | 21.2362   | 0.4319 | 0.6033 |         |
| A | 1016.8665 | 66.9365  | 21.9604   | 0.7463 | 0.8547 |         |
| A | 1001.8318 | 50.5572  | 6.5897    | 0.3778 | 0.5484 |         |
| A | 990.8772  | 320.6145 | 56.5672   | 0.7339 | 0.8465 |         |
| A | 944.1395  | 58.7931  | 4.8757    | 0.1628 | 0.2800 |         |
| A | 925.9041  | 85.6362  | 17.1498   | 0.7498 | 0.8570 |         |
| A | 873.3921  | 10.8441  | 16.7483   | 0.1341 | 0.2364 |         |
| A | 826.8600  | 14.7516  | 20.7828   | 0.0915 | 0.1676 |         |
| A | 748.0151  | 4.5302   | 5.4041    | 0.5614 | 0.7191 |         |
| A | 691.2755  | 17.8840  | 24.0196   | 0.1222 | 0.2179 |         |
| A | 654.9530  | 15.3640  | 5.8987    | 0.7346 | 0.8470 |         |
| A | 619.8317  | 6.9791   | 2.7707    | 0.0972 | 0.1772 |         |
| A | 537.0868  | 6.4181   | 5.4518    | 0.6798 | 0.8094 |         |
| A | 529.1572  | 15.3446  | 2.0720    | 0.3042 | 0.4665 |         |
| A | 492.5297  | 12.0242  | 6.1021    | 0.1814 | 0.3071 |         |
| A | 473.9778  | 0.8121   | 0.4282    | 0.6731 | 0.8046 |         |
| A | 450.5935  | 10.7099  | 5.5911    | 0.1734 | 0.2956 |         |
| A | 308.7416  | 6.4640   | 5.3448    | 0.3963 | 0.5676 |         |
| A | 295.0237  | 0.6445   | 12.8645   | 0.0898 | 0.1648 |         |
| A | 280.4037  | 8.0571   | 3.4149    | 0.5760 | 0.7310 |         |
| A | 208.9711  | 9.4625   | 2.9936    | 0.6688 | 0.8015 |         |

|   |          |        |        |        |        |
|---|----------|--------|--------|--------|--------|
| A | 155.0017 | 1.8314 | 1.0841 | 0.6936 | 0.8191 |
| A | 122.9429 | 1.9458 | 0.7195 | 0.7085 | 0.8294 |
| A | 91.7420  | 2.1065 | 3.4388 | 0.7363 | 0.8481 |
| A | 79.7295  | 6.0219 | 1.7198 | 0.7480 | 0.8558 |
| A | 51.0846  | 1.5450 | 1.1915 | 0.7240 | 0.8399 |
| A | 37.2370  | 0.0680 | 0.0870 | 0.7490 | 0.8565 |
| A | 25.1915  | 1.7247 | 0.2774 | 0.7500 | 0.8571 |

6-endo-dig prod for 4,5-Au-PH3 complex of hexa-4,5-dienoic acid carboxylate:

Processing auphexdienoat6prod6psdm6.log  
PG=C01

|        |          |                 |
|--------|----------|-----------------|
| Method | BasisSet | Imaginary Freqs |
| RM06   | GenECP   | 0               |

HF Energy  
-861.9512852

|    | ZPE       | E298      | S298      | Squasihar | Equasihar | Strans | Srot   |
|----|-----------|-----------|-----------|-----------|-----------|--------|--------|
|    | 92.33705  | 100.060   | 115.919   | 110.417   | 100.091   | 43.383 | 31.630 |
| 20 |           |           |           |           |           |        |        |
| C  | 3.817339  | -0.150501 | 0.070318  |           |           |        |        |
| O  | 3.092141  | 0.993573  | 0.065446  |           |           |        |        |
| C  | 1.698057  | 1.070332  | -0.059895 |           |           |        |        |
| C  | 0.972599  | -0.191898 | -0.391382 |           |           |        |        |
| C  | 1.614772  | -1.359594 | 0.356626  |           |           |        |        |
| C  | 3.079810  | -1.458020 | -0.038281 |           |           |        |        |
| C  | 1.207055  | 2.300671  | 0.101883  |           |           |        |        |
| Au | -1.105522 | -0.079383 | -0.086009 |           |           |        |        |
| P  | -3.467521 | -0.011657 | 0.256143  |           |           |        |        |
| O  | 5.017506  | -0.070045 | 0.155711  |           |           |        |        |
| H  | 1.872228  | 3.138773  | 0.288133  |           |           |        |        |
| H  | 0.138738  | 2.476671  | 0.036451  |           |           |        |        |
| H  | 1.102603  | -0.375606 | -1.473040 |           |           |        |        |
| H  | -4.321986 | -0.279517 | -0.833564 |           |           |        |        |
| H  | -4.054993 | 1.191382  | 0.699061  |           |           |        |        |
| H  | -4.040877 | -0.889690 | 1.199139  |           |           |        |        |
| H  | 1.525685  | -1.206850 | 1.442376  |           |           |        |        |
| H  | 1.100991  | -2.301507 | 0.130537  |           |           |        |        |
| H  | 3.648026  | -2.188666 | 0.548049  |           |           |        |        |
| H  | 3.163699  | -1.773065 | -1.089428 |           |           |        |        |

WARNING: Geometry optimization converged in opt job, but not in freq job

Population analysis using the SCF density.

| Label | Frequencies | IR Inten | Raman Activ | Depolar (P) | Depolar (U) | Dipole  |
|-------|-------------|----------|-------------|-------------|-------------|---------|
| A     | 3269.6799   | 8.4216   | 52.0257     | 0.6963      | 0.8210      | 10.4885 |
| A     | 3165.4574   | 0.3707   | 134.2398    | 0.1909      | 0.3205      |         |
| A     | 3107.2936   | 15.9765  | 152.4317    | 0.4369      | 0.6081      |         |
| A     | 3088.0035   | 22.3321  | 71.9985     | 0.3875      | 0.5586      |         |
| A     | 3033.6532   | 19.6953  | 58.5330     | 0.2244      | 0.3666      |         |
| A     | 3025.9020   | 17.6665  | 116.5510    | 0.0664      | 0.1245      |         |
| A     | 2988.3198   | 12.1823  | 109.1933    | 0.2020      | 0.3360      |         |
| A     | 2502.6788   | 16.4184  | 134.3525    | 0.7432      | 0.8527      |         |
| A     | 2501.0495   | 16.5868  | 132.5058    | 0.7083      | 0.8293      |         |
| A     | 2487.0780   | 89.2542  | 545.3680    | 0.0717      | 0.1338      |         |
| A     | 1864.2726   | 569.6070 | 29.3279     | 0.2319      | 0.3765      |         |
| A     | 1721.8128   | 129.2495 | 68.3029     | 0.1673      | 0.2867      |         |
| A     | 1464.0183   | 7.4339   | 8.3721      | 0.6056      | 0.7543      |         |
| A     | 1427.5289   | 8.2957   | 7.7411      | 0.7049      | 0.8269      |         |
| A     | 1382.7741   | 1.4504   | 19.7018     | 0.4207      | 0.5922      |         |
| A     | 1354.5706   | 125.9756 | 0.9019      | 0.4385      | 0.6097      |         |
| A     | 1339.2828   | 1.0407   | 12.6174     | 0.4088      | 0.5804      |         |
| A     | 1311.6813   | 32.5762  | 13.9336     | 0.4750      | 0.6441      |         |
| A     | 1285.6940   | 197.9108 | 1.4638      | 0.7493      | 0.8567      |         |
| A     | 1245.5226   | 17.8126  | 26.6287     | 0.3844      | 0.5553      |         |
| A     | 1192.5011   | 392.6044 | 25.1597     | 0.4983      | 0.6652      |         |
| A     | 1165.7309   | 18.2332  | 9.6959      | 0.1244      | 0.2212      |         |
| A     | 1132.7210   | 3.7444   | 16.6909     | 0.7499      | 0.8571      |         |
| A     | 1130.9515   | 4.7344   | 16.6532     | 0.7121      | 0.8319      |         |
| A     | 1107.4248   | 2.3095   | 100.4916    | 0.2752      | 0.4316      |         |
| A     | 1080.3918   | 15.0809  | 44.0147     | 0.3912      | 0.5624      |         |
| A     | 1038.7001   | 15.1868  | 8.7267      | 0.1877      | 0.3161      |         |
| A     | 1020.1206   | 176.4472 | 9.4619      | 0.7441      | 0.8533      |         |
| A     | 1013.9937   | 27.7877  | 35.2462     | 0.4910      | 0.6586      |         |
| A     | 969.7707    | 9.7798   | 9.2227      | 0.4272      | 0.5987      |         |
| A     | 914.4204    | 9.4067   | 3.7350      | 0.2935      | 0.4537      |         |
| A     | 871.2924    | 6.6391   | 3.6394      | 0.7134      | 0.8327      |         |
| A     | 850.9799    | 53.1761  | 4.6310      | 0.7466      | 0.8549      |         |
| A     | 758.9134    | 1.6594   | 1.6040      | 0.4896      | 0.6574      |         |
| A     | 725.1244    | 2.2801   | 12.3567     | 0.1241      | 0.2208      |         |
| A     | 702.3710    | 2.7744   | 13.8152     | 0.1405      | 0.2464      |         |
| A     | 625.7057    | 0.4810   | 1.7333      | 0.4994      | 0.6662      |         |
| A     | 589.6189    | 14.8194  | 7.6287      | 0.1211      | 0.2160      |         |
| A     | 562.6882    | 10.1081  | 2.5169      | 0.3302      | 0.4965      |         |
| A     | 510.7680    | 6.0020   | 0.5983      | 0.5204      | 0.6845      |         |
| A     | 454.4346    | 5.3685   | 4.3070      | 0.2971      | 0.4581      |         |
| A     | 432.4115    | 1.8253   | 0.4084      | 0.7382      | 0.8494      |         |
| A     | 420.7090    | 0.6509   | 0.1847      | 0.5714      | 0.7272      |         |
| A     | 354.3624    | 1.9018   | 2.7621      | 0.7229      | 0.8391      |         |
| A     | 302.4840    | 0.7465   | 3.4898      | 0.6355      | 0.7771      |         |
| A     | 254.9958    | 0.7560   | 9.1928      | 0.2016      | 0.3355      |         |



|   |          |        |        |        |        |
|---|----------|--------|--------|--------|--------|
| A | 201.6911 | 3.1055 | 3.1108 | 0.2240 | 0.3661 |
| A | 171.4478 | 1.5255 | 3.7125 | 0.3243 | 0.4897 |
| A | 147.5645 | 2.4595 | 0.4125 | 0.1469 | 0.2561 |
| A | 103.3115 | 0.4688 | 0.9882 | 0.6450 | 0.7842 |
| A | 74.9337  | 0.0337 | 0.0894 | 0.7467 | 0.8550 |
| A | 61.9624  | 5.8075 | 1.4329 | 0.6439 | 0.7834 |
| A | 56.7059  | 1.7339 | 1.4626 | 0.7454 | 0.8542 |
| A | 23.2332  | 1.5168 | 0.3943 | 0.5920 | 0.7437 |

Processing auphexdienoat6prod6psd1pbedcms.log  
PG=C01

Method BasisSet Imaginary Freqs  
RPBE1PBE GenECP 0

HF Energy  
-861.6431559

|  | ZPE      | E298    | S298    | Squasihar | Equasihar | Strans | Srot   |
|--|----------|---------|---------|-----------|-----------|--------|--------|
|  | 93.16017 | 100.697 | 113.308 | 109.383   | 100.723   | 43.383 | 31.615 |

20

|    |           |           |           |
|----|-----------|-----------|-----------|
| C  | 3.806882  | -0.152362 | 0.055410  |
| O  | 3.092190  | 0.990930  | 0.057266  |
| C  | 1.688757  | 1.064683  | -0.056169 |
| C  | 0.953128  | -0.194804 | -0.372215 |
| C  | 1.615120  | -1.366602 | 0.360070  |
| C  | 3.080246  | -1.461464 | -0.047540 |
| C  | 1.210881  | 2.303683  | 0.102118  |
| Au | -1.114081 | -0.080441 | -0.075846 |
| P  | -3.422084 | -0.005550 | 0.226946  |
| O  | 5.015231  | -0.055799 | 0.133452  |
| H  | 1.878518  | 3.143968  | 0.270380  |
| H  | 0.142305  | 2.478733  | 0.055395  |
| H  | 1.090228  | -0.373604 | -1.452975 |
| H  | -4.236287 | -0.245437 | -0.896742 |
| H  | -3.981168 | 1.203027  | 0.684818  |
| H  | -3.994611 | -0.907104 | 1.145062  |
| H  | 1.539548  | -1.232813 | 1.446782  |
| H  | 1.110086  | -2.307407 | 0.121319  |
| H  | 3.649050  | -2.190823 | 0.537559  |
| H  | 3.156519  | -1.770256 | -1.099709 |

Population analysis using the SCF density.

| Label | Frequencies | IR Inten | Raman Activ | Depolar (P) | Depolar (U) | Dipole  |
|-------|-------------|----------|-------------|-------------|-------------|---------|
| A     | 3296.1342   | 7.8559   | 127.2339    | 0.7500      | 0.8571      | 13.2665 |
| A     | 3191.2355   | 0.7798   | 320.9549    | 0.1800      | 0.3050      |         |

|   |           |          |          |        |        |
|---|-----------|----------|----------|--------|--------|
| A | 3137.4065 | 20.9367  | 317.6580 | 0.5291 | 0.6920 |
| A | 3130.6103 | 29.7676  | 254.9278 | 0.3315 | 0.4979 |
| A | 3070.5076 | 41.6404  | 54.6217  | 0.5527 | 0.7119 |
| A | 3064.7043 | 9.7877   | 430.3717 | 0.0754 | 0.1402 |
| A | 3005.1727 | 26.0019  | 342.4575 | 0.2532 | 0.4041 |
| A | 2533.3151 | 8.6982   | 308.1538 | 0.7465 | 0.8549 |
| A | 2532.2193 | 8.4000   | 320.8910 | 0.7487 | 0.8563 |
| A | 2516.3986 | 54.9249  | 997.6488 | 0.0329 | 0.0637 |
| A | 1807.3069 | 763.3055 | 109.2098 | 0.1651 | 0.2834 |
| A | 1710.8518 | 277.9139 | 206.4041 | 0.1812 | 0.3068 |
| A | 1478.5329 | 10.2833  | 21.6721  | 0.6056 | 0.7543 |
| A | 1431.2013 | 8.4477   | 16.3525  | 0.7409 | 0.8512 |
| A | 1401.8166 | 3.6725   | 55.1289  | 0.4646 | 0.6344 |
| A | 1367.4078 | 204.4923 | 3.9017   | 0.1879 | 0.3164 |
| A | 1350.9778 | 1.7561   | 23.7827  | 0.6049 | 0.7538 |
| A | 1316.4863 | 31.2667  | 18.2542  | 0.5357 | 0.6977 |
| A | 1297.9080 | 328.4417 | 1.8354   | 0.4859 | 0.6540 |
| A | 1252.4864 | 28.7023  | 34.2354  | 0.3595 | 0.5289 |
| A | 1178.1650 | 26.8487  | 12.5099  | 0.4796 | 0.6483 |
| A | 1162.7217 | 618.8423 | 66.2463  | 0.4930 | 0.6604 |
| A | 1124.9119 | 11.3146  | 39.0823  | 0.6811 | 0.8103 |
| A | 1121.6355 | 10.2014  | 42.3846  | 0.7492 | 0.8566 |
| A | 1111.6873 | 4.4610   | 149.2763 | 0.2572 | 0.4091 |
| A | 1084.4428 | 60.3503  | 69.1897  | 0.3955 | 0.5669 |
| A | 1039.9064 | 53.3469  | 10.5854  | 0.0472 | 0.0901 |
| A | 1023.2110 | 9.9218   | 34.3418  | 0.2982 | 0.4595 |
| A | 996.2188  | 248.2028 | 65.6131  | 0.7390 | 0.8499 |
| A | 971.0868  | 18.0237  | 21.3685  | 0.3684 | 0.5385 |
| A | 922.3555  | 19.1055  | 6.8610   | 0.4055 | 0.5770 |
| A | 879.8442  | 20.9190  | 7.5981   | 0.7389 | 0.8498 |
| A | 864.9817  | 114.7467 | 24.8870  | 0.7426 | 0.8523 |
| A | 765.8247  | 2.0035   | 3.6542   | 0.7344 | 0.8469 |
| A | 733.2992  | 7.4428   | 14.6314  | 0.1337 | 0.2359 |
| A | 704.3573  | 9.1387   | 30.2677  | 0.1351 | 0.2380 |
| A | 634.1895  | 3.2866   | 4.9896   | 0.2545 | 0.4057 |
| A | 595.6546  | 20.3430  | 11.8922  | 0.1594 | 0.2750 |
| A | 567.7672  | 23.7627  | 4.1825   | 0.2609 | 0.4139 |
| A | 517.2613  | 12.6697  | 0.5704   | 0.6148 | 0.7614 |
| A | 480.1169  | 0.5688   | 1.5462   | 0.3628 | 0.5324 |
| A | 476.9848  | 1.0699   | 0.4757   | 0.6559 | 0.7922 |
| A | 456.9638  | 8.3648   | 8.7314   | 0.3836 | 0.5545 |
| A | 358.0931  | 4.4325   | 5.1063   | 0.7358 | 0.8478 |
| A | 308.9806  | 3.3550   | 5.8650   | 0.7037 | 0.8261 |
| A | 297.1695  | 0.2582   | 15.1444  | 0.1277 | 0.2264 |
| A | 198.6981  | 5.3647   | 2.2564   | 0.2700 | 0.4253 |
| A | 175.5273  | 3.0083   | 3.6064   | 0.3820 | 0.5528 |
| A | 152.7571  | 3.4662   | 0.7875   | 0.2921 | 0.4521 |

|   |          |         |        |        |        |
|---|----------|---------|--------|--------|--------|
| A | 115.6599 | 0.6864  | 2.0872 | 0.6493 | 0.7874 |
| A | 81.4510  | 0.1927  | 0.3026 | 0.7498 | 0.8570 |
| A | 74.6540  | 10.4196 | 1.8699 | 0.6319 | 0.7744 |
| A | 60.0182  | 3.2380  | 1.1586 | 0.7500 | 0.8571 |
| A | 37.2076  | 2.5749  | 1.8067 | 0.6605 | 0.7956 |

6-exo-dig prod for 4,5-Au-PH3 complex of hexa-4,5-dienoic acid carboxylate:

Processing auphexdienoat6xprod6psdm6.log  
PG=C01

Method BasisSet Imaginary Freqs  
RM06 GenECP 0

HF Energy  
-861.9584026

|    | ZPE       | E298      | S298      | Squasihar | Equasihar | Strans | Srot   |
|----|-----------|-----------|-----------|-----------|-----------|--------|--------|
|    | 92.35384  | 100.155   | 118.330   | 111.445   | 100.187   | 43.383 | 31.990 |
| 20 |           |           |           |           |           |        |        |
| O  | 2.897035  | -0.921254 | -0.131735 |           |           |        |        |
| C  | 1.704529  | -0.180515 | -0.105034 |           |           |        |        |
| C  | 1.739690  | 1.152703  | -0.202182 |           |           |        |        |
| C  | 3.038192  | 1.892201  | -0.277752 |           |           |        |        |
| C  | 4.102617  | 1.099919  | 0.469299  |           |           |        |        |
| C  | 4.113283  | -0.349399 | 0.066466  |           |           |        |        |
| C  | 0.543989  | -1.100941 | -0.013829 |           |           |        |        |
| Au | -1.353119 | -0.232721 | 0.007351  |           |           |        |        |
| P  | -3.555707 | 0.687074  | 0.038613  |           |           |        |        |
| O  | 5.104211  | -1.023977 | -0.050144 |           |           |        |        |
| H  | 0.654999  | -1.715457 | 0.891707  |           |           |        |        |
| H  | 0.592785  | -1.807638 | -0.855136 |           |           |        |        |
| H  | 0.795245  | 1.689376  | -0.224922 |           |           |        |        |
| H  | -4.625770 | -0.137592 | 0.444235  |           |           |        |        |
| H  | -3.821427 | 1.798727  | 0.865505  |           |           |        |        |
| H  | -4.111106 | 1.179147  | -1.160947 |           |           |        |        |
| H  | 3.343330  | 2.045478  | -1.325489 |           |           |        |        |
| H  | 2.945129  | 2.893325  | 0.159612  |           |           |        |        |
| H  | 5.115195  | 1.488649  | 0.331889  |           |           |        |        |
| H  | 3.879865  | 1.122828  | 1.546846  |           |           |        |        |

Population analysis using the SCF density.

| Label | Frequencies | IR Inten | Raman Activ | Depolar (P) | Depolar (U) | Dipole |
|-------|-------------|----------|-------------|-------------|-------------|--------|
| A     | 3201.3749   | 14.5335  | 88.7586     | 0.2197      | 0.3603      | 9.7631 |
| A     | 3131.0073   | 12.6033  | 119.5858    | 0.4247      | 0.5962      |        |
| A     | 3080.4696   | 22.4620  | 112.9466    | 0.4430      | 0.6140      |        |

|   |           |          |          |        |        |
|---|-----------|----------|----------|--------|--------|
| A | 3074.3695 | 3.5827   | 81.2418  | 0.7500 | 0.8571 |
| A | 3033.6825 | 14.9978  | 77.7714  | 0.1503 | 0.2613 |
| A | 3029.5643 | 16.9136  | 167.8048 | 0.0512 | 0.0975 |
| A | 3004.7105 | 38.7888  | 213.2381 | 0.1380 | 0.2425 |
| A | 2501.3826 | 18.6773  | 122.4225 | 0.7458 | 0.8544 |
| A | 2497.5451 | 21.2741  | 152.1372 | 0.5516 | 0.7110 |
| A | 2484.5818 | 84.9474  | 479.8919 | 0.0756 | 0.1406 |
| A | 1875.5236 | 515.3961 | 18.9300  | 0.4682 | 0.6378 |
| A | 1755.9238 | 61.9855  | 41.9372  | 0.1408 | 0.2468 |
| A | 1461.9456 | 4.4760   | 16.3083  | 0.5711 | 0.7270 |
| A | 1432.8324 | 14.7652  | 6.8243   | 0.7484 | 0.8561 |
| A | 1427.7664 | 8.8819   | 17.5217  | 0.6981 | 0.8222 |
| A | 1363.0979 | 87.7280  | 1.6013   | 0.6364 | 0.7778 |
| A | 1334.8711 | 3.9037   | 8.6295   | 0.3367 | 0.5038 |
| A | 1302.6314 | 34.6537  | 51.5138  | 0.5598 | 0.7178 |
| A | 1246.0268 | 99.6714  | 22.6283  | 0.4143 | 0.5859 |
| A | 1236.2030 | 133.3091 | 19.0238  | 0.1235 | 0.2199 |
| A | 1188.3993 | 204.8587 | 22.6654  | 0.4690 | 0.6385 |
| A | 1159.4300 | 55.4223  | 4.6053   | 0.1911 | 0.3209 |
| A | 1141.8460 | 9.9447   | 0.8090   | 0.7257 | 0.8410 |
| A | 1133.5558 | 5.4953   | 16.9759  | 0.7414 | 0.8515 |
| A | 1131.9521 | 3.6076   | 18.3565  | 0.7500 | 0.8571 |
| A | 1117.2779 | 90.4529  | 68.9292  | 0.2089 | 0.3457 |
| A | 1070.9468 | 117.4696 | 3.5594   | 0.6313 | 0.7739 |
| A | 1036.9345 | 4.9280   | 5.3839   | 0.2323 | 0.3770 |
| A | 1019.4666 | 211.8127 | 21.3828  | 0.7197 | 0.8370 |
| A | 985.3020  | 19.9886  | 2.6678   | 0.2278 | 0.3710 |
| A | 945.9028  | 4.6066   | 4.0486   | 0.3945 | 0.5658 |
| A | 908.0787  | 6.6520   | 2.1281   | 0.2536 | 0.4045 |
| A | 806.5619  | 16.8057  | 2.8941   | 0.4974 | 0.6644 |
| A | 775.5005  | 11.9778  | 11.9981  | 0.0664 | 0.1245 |
| A | 705.7638  | 8.0478   | 4.9391   | 0.0994 | 0.1808 |
| A | 689.7806  | 0.1330   | 1.4217   | 0.2088 | 0.3454 |
| A | 640.4023  | 4.0618   | 11.7210  | 0.2400 | 0.3871 |
| A | 598.1291  | 3.8647   | 2.3213   | 0.1651 | 0.2834 |
| A | 540.9708  | 6.2126   | 2.3495   | 0.5594 | 0.7175 |
| A | 530.0034  | 1.4395   | 1.6133   | 0.6188 | 0.7645 |
| A | 461.0033  | 3.1994   | 8.0548   | 0.3592 | 0.5286 |
| A | 444.9731  | 2.7017   | 0.8675   | 0.3446 | 0.5125 |
| A | 424.3545  | 2.0411   | 0.3053   | 0.7496 | 0.8569 |
| A | 409.2034  | 1.6343   | 1.3829   | 0.1171 | 0.2097 |
| A | 255.1750  | 0.6048   | 6.9306   | 0.1583 | 0.2733 |
| A | 235.8732  | 1.0786   | 1.0258   | 0.6962 | 0.8209 |
| A | 198.6168  | 7.3095   | 4.9927   | 0.3418 | 0.5095 |
| A | 140.3891  | 5.1971   | 0.4538   | 0.7416 | 0.8516 |
| A | 127.1505  | 0.6778   | 0.4679   | 0.5466 | 0.7068 |
| A | 109.2325  | 1.5649   | 0.3613   | 0.4229 | 0.5944 |

|   |         |        |        |        |        |
|---|---------|--------|--------|--------|--------|
| A | 91.0343 | 0.7022 | 0.6729 | 0.7476 | 0.8556 |
| A | 50.1665 | 1.3362 | 1.1750 | 0.6893 | 0.8161 |
| A | 33.8572 | 0.4192 | 0.3130 | 0.6953 | 0.8203 |
| A | 19.7079 | 0.0445 | 0.1802 | 0.7496 | 0.8569 |

Processing auphexdienoat6xprod6psd1pbedcms.log  
PG=C01

WARNING: Imaginary frequencies

|          |          |                 |
|----------|----------|-----------------|
| Method   | BasisSet | Imaginary Freqs |
| RPBE1PBE | GenECP   | 1               |

HF Energy  
-861.6514869

|    | ZPE       | E298      | S298      | Squasihar | Equasihar | Strans | Srot   |
|----|-----------|-----------|-----------|-----------|-----------|--------|--------|
|    | 93.02068  | 100.124   | 110.329   | 107.196   | 100.143   | 43.383 | 31.980 |
| 20 |           |           |           |           |           |        |        |
| O  | 2.895936  | -0.923574 | -0.141313 |           |           |        |        |
| C  | 1.694982  | -0.176743 | -0.122205 |           |           |        |        |
| C  | 1.744740  | 1.156376  | -0.220462 |           |           |        |        |
| C  | 3.048569  | 1.890913  | -0.281555 |           |           |        |        |
| C  | 4.110392  | 1.092785  | 0.467357  |           |           |        |        |
| C  | 4.102025  | -0.356586 | 0.078382  |           |           |        |        |
| C  | 0.526235  | -1.089619 | -0.034326 |           |           |        |        |
| Au | -1.361898 | -0.226490 | 0.004783  |           |           |        |        |
| P  | -3.510551 | 0.674927  | 0.057627  |           |           |        |        |
| O  | 5.088646  | -1.056361 | -0.012812 |           |           |        |        |
| H  | 0.647191  | -1.711753 | 0.865998  |           |           |        |        |
| H  | 0.576156  | -1.796440 | -0.876949 |           |           |        |        |
| H  | 0.805073  | 1.698572  | -0.247950 |           |           |        |        |
| H  | -4.547630 | -0.139415 | 0.552316  |           |           |        |        |
| H  | -3.718847 | 1.834109  | 0.829802  |           |           |        |        |
| H  | -4.081565 | 1.086808  | -1.162058 |           |           |        |        |
| H  | 3.358542  | 2.050277  | -1.324981 |           |           |        |        |
| H  | 2.953559  | 2.884614  | 0.167273  |           |           |        |        |
| H  | 5.121160  | 1.477819  | 0.318722  |           |           |        |        |
| H  | 3.896226  | 1.120974  | 1.545393  |           |           |        |        |

Population analysis using the SCF density.

| Label | Frequencies | IR Inten | Raman Activ | Depolar (P) | Depolar (U) | Dipole  |
|-------|-------------|----------|-------------|-------------|-------------|---------|
| A     | 3236.1067   | 10.8058  | 227.8253    | 0.2257      | 0.3682      | 12.4860 |
| A     | 3165.0795   | 11.5816  | 239.3057    | 0.4342      | 0.6055      |         |
| A     | 3122.5375   | 21.5166  | 263.6850    | 0.4189      | 0.5904      |         |
| A     | 3068.1657   | 15.8947  | 283.1342    | 0.7373      | 0.8488      |         |

|   |           |          |          |        |        |
|---|-----------|----------|----------|--------|--------|
| A | 3067.4774 | 11.7723  | 175.6740 | 0.2106 | 0.3479 |
| A | 3043.2402 | 40.7157  | 490.9281 | 0.1362 | 0.2397 |
| A | 3032.0301 | 51.7096  | 500.0238 | 0.0770 | 0.1430 |
| A | 2532.1584 | 10.0401  | 304.2274 | 0.7415 | 0.8516 |
| A | 2529.7539 | 9.6569   | 325.3917 | 0.7171 | 0.8353 |
| A | 2514.8932 | 52.6989  | 926.4117 | 0.0300 | 0.0583 |
| A | 1817.9292 | 727.7872 | 43.3727  | 0.4009 | 0.5724 |
| A | 1758.8448 | 97.1683  | 132.4807 | 0.1127 | 0.2026 |
| A | 1465.9011 | 7.7567   | 41.1647  | 0.5784 | 0.7329 |
| A | 1440.4907 | 22.5926  | 16.1597  | 0.7413 | 0.8514 |
| A | 1432.1848 | 7.4421   | 56.1458  | 0.6581 | 0.7938 |
| A | 1377.8475 | 95.0789  | 3.1641   | 0.6605 | 0.7956 |
| A | 1346.0748 | 10.0845  | 13.0810  | 0.3176 | 0.4821 |
| A | 1312.8996 | 88.3148  | 65.4733  | 0.5788 | 0.7332 |
| A | 1249.5462 | 75.4478  | 35.6796  | 0.1308 | 0.2313 |
| A | 1244.6895 | 121.3956 | 16.6162  | 0.7314 | 0.8448 |
| A | 1185.4027 | 207.0540 | 78.0486  | 0.3473 | 0.5156 |
| A | 1171.7754 | 158.0639 | 7.5177   | 0.7497 | 0.8569 |
| A | 1154.6871 | 17.3708  | 4.0900   | 0.6185 | 0.7643 |
| A | 1124.1470 | 14.8435  | 46.9231  | 0.7095 | 0.8301 |
| A | 1119.9950 | 19.8820  | 50.6243  | 0.6194 | 0.7650 |
| A | 1118.7587 | 95.8987  | 72.4032  | 0.1631 | 0.2805 |
| A | 1065.1042 | 278.2601 | 5.1052   | 0.1994 | 0.3325 |
| A | 1044.7203 | 9.3459   | 11.0573  | 0.3402 | 0.5077 |
| A | 995.6457  | 265.2972 | 57.8381  | 0.7459 | 0.8545 |
| A | 981.5541  | 41.3457  | 3.2061   | 0.3548 | 0.5238 |
| A | 950.5847  | 21.2030  | 9.1511   | 0.3894 | 0.5605 |
| A | 914.3818  | 7.5822   | 3.2031   | 0.4545 | 0.6249 |
| A | 824.1033  | 49.1733  | 8.8270   | 0.6776 | 0.8078 |
| A | 781.1967  | 28.0139  | 18.7124  | 0.0664 | 0.1244 |
| A | 706.7264  | 26.1733  | 12.6074  | 0.0868 | 0.1598 |
| A | 693.7570  | 2.1141   | 4.6008   | 0.3489 | 0.5174 |
| A | 644.0852  | 9.2955   | 11.3267  | 0.2489 | 0.3986 |
| A | 603.5834  | 4.5949   | 4.1013   | 0.1386 | 0.2434 |
| A | 545.1926  | 9.0478   | 6.7916   | 0.7236 | 0.8396 |
| A | 533.1121  | 6.4227   | 4.0312   | 0.7394 | 0.8502 |
| A | 478.7137  | 1.1444   | 0.4762   | 0.2618 | 0.4150 |
| A | 469.6262  | 5.7199   | 9.6262   | 0.4367 | 0.6080 |
| A | 463.7313  | 5.6152   | 5.2926   | 0.3253 | 0.4909 |
| A | 436.0876  | 7.5109   | 3.4209   | 0.3083 | 0.4713 |
| A | 294.8914  | 0.5424   | 11.3767  | 0.0877 | 0.1612 |
| A | 232.9675  | 3.1998   | 2.8140   | 0.7486 | 0.8562 |
| A | 198.5866  | 11.9072  | 5.1197   | 0.4116 | 0.5832 |
| A | 139.8332  | 6.7002   | 0.5615   | 0.7355 | 0.8476 |
| A | 133.2744  | 3.2669   | 0.8181   | 0.6769 | 0.8073 |
| A | 114.0950  | 2.6281   | 0.8826   | 0.6437 | 0.7832 |
| A | 97.3649   | 0.7387   | 1.2983   | 0.7499 | 0.8571 |

|   |         |        |        |        |        |
|---|---------|--------|--------|--------|--------|
| A | 56.1621 | 3.1494 | 0.9884 | 0.7440 | 0.8532 |
| A | 37.2144 | 0.1885 | 0.1106 | 0.7499 | 0.8571 |
| A | -1.3556 | 0.2025 | 0.0368 | 0.5954 | 0.7464 |

6-exo-dig prod2 for 4,5-Au-PH3 complex of hexa-4,5-dienoic acid carboxylate:

Processing auphexdienoat6xprod26psdm6.log  
PG=C01

|        |          |                 |
|--------|----------|-----------------|
| Method | BasisSet | Imaginary Freqs |
| RM06   | GenECP   | 0               |

HF Energy  
-861.9584258

|          |         |         |           |           |        |        |
|----------|---------|---------|-----------|-----------|--------|--------|
| ZPE      | E298    | S298    | Squasihar | Equasihar | Strans | Srot   |
| 92.44617 | 100.181 | 116.664 | 111.406   | 100.207   | 43.383 | 31.991 |

20

|    |           |           |           |
|----|-----------|-----------|-----------|
| C  | 0.544060  | -1.102255 | 0.011849  |
| C  | 1.703836  | -0.180909 | 0.104006  |
| C  | 1.737753  | 1.152426  | 0.200053  |
| C  | 3.035468  | 1.893252  | 0.276036  |
| C  | 4.101402  | 1.101025  | -0.468923 |
| C  | 4.112916  | -0.347797 | -0.064316 |
| O  | 5.104329  | -1.021249 | 0.054608  |
| Au | -1.353216 | -0.234567 | -0.008409 |
| P  | -3.552780 | 0.692031  | -0.034831 |
| O  | 2.896915  | -0.920619 | 0.132692  |
| H  | -3.701673 | 2.094047  | 0.012455  |
| H  | -4.449524 | 0.350213  | 0.998841  |
| H  | -4.391496 | 0.428459  | -1.138005 |
| H  | 0.655410  | -1.715658 | -0.894410 |
| H  | 0.593241  | -1.809782 | 0.852421  |
| H  | 0.792823  | 1.688308  | 0.221392  |
| H  | 2.941868  | 2.893702  | -0.162765 |
| H  | 3.339375  | 2.048238  | 1.323876  |
| H  | 3.879737  | 1.122429  | -1.546725 |
| H  | 5.113476  | 1.490848  | -0.330915 |

Population analysis using the SCF density.

|       |             |          |        |
|-------|-------------|----------|--------|
| Label | Frequencies | IR Inten | Dipole |
| A     | 3201.3799   | 14.5450  | 9.7625 |
| A     | 3130.9761   | 12.6016  |        |
| A     | 3080.4071   | 22.4280  |        |
| A     | 3074.4393   | 3.6401   |        |
| A     | 3033.6033   | 15.0428  |        |

|   |           |          |
|---|-----------|----------|
| A | 3029.5860 | 16.8829  |
| A | 3004.7471 | 38.7466  |
| A | 2501.2921 | 18.4057  |
| A | 2501.2036 | 17.9128  |
| A | 2487.5387 | 88.6267  |
| A | 1875.5458 | 515.3726 |
| A | 1755.9023 | 61.9098  |
| A | 1461.9621 | 4.4782   |
| A | 1432.8387 | 14.7950  |
| A | 1427.7434 | 8.7574   |
| A | 1363.0861 | 87.6249  |
| A | 1334.8646 | 3.9333   |
| A | 1302.6287 | 34.5488  |
| A | 1245.9959 | 100.1384 |
| A | 1236.1692 | 132.7568 |
| A | 1188.3464 | 204.9337 |
| A | 1159.4005 | 55.7997  |
| A | 1141.8025 | 9.8568   |
| A | 1133.3251 | 4.1819   |
| A | 1132.8493 | 3.7652   |
| A | 1117.1340 | 90.2121  |
| A | 1070.9425 | 117.1484 |
| A | 1036.9375 | 4.8894   |
| A | 1021.7727 | 213.2893 |
| A | 985.2924  | 19.9275  |
| A | 945.9206  | 4.6087   |
| A | 908.0400  | 6.6357   |
| A | 806.6614  | 16.5640  |
| A | 775.5128  | 11.9119  |
| A | 705.8386  | 7.9243   |
| A | 689.9479  | 0.2029   |
| A | 640.4301  | 4.0861   |
| A | 598.4212  | 3.8457   |
| A | 540.9724  | 6.2054   |
| A | 530.1605  | 1.4546   |
| A | 461.0245  | 3.1316   |
| A | 446.3906  | 2.7712   |
| A | 422.5768  | 1.1046   |
| A | 416.1808  | 2.6908   |
| A | 255.2641  | 0.6004   |
| A | 235.8977  | 1.0893   |
| A | 198.6342  | 7.3227   |
| A | 140.3835  | 5.2125   |
| A | 127.3979  | 0.6196   |
| A | 109.8434  | 1.6370   |
| A | 91.1632   | 0.5173   |
| A | 82.3466   | 0.2431   |



A 49.6935 1.6559  
A 18.6216 0.0562

Processing auphexdienoat6xprod26psd1pbedcms.log  
PG=C01

Method BasisSet Imaginary Freqs  
RPBE1PBE GenECP 0

HF Energy  
-861.6515057

|  | ZPE      | E298    | S298    | Squasihar | Equasihar | Strans | Srot   |
|--|----------|---------|---------|-----------|-----------|--------|--------|
|  | 93.07073 | 100.718 | 117.752 | 110.639   | 100.744   | 43.383 | 31.980 |

20

|    |           |           |           |
|----|-----------|-----------|-----------|
| C  | -0.526312 | -1.089218 | -0.028825 |
| C  | -1.694913 | -0.176395 | -0.119309 |
| C  | -1.744554 | 1.156839  | -0.215968 |
| C  | -3.048267 | 1.891454  | -0.278664 |
| C  | -4.111820 | 1.091937  | 0.466349  |
| C  | -4.102438 | -0.356741 | 0.074815  |
| O  | -5.088791 | -1.056347 | -0.020467 |
| Au | 1.362055  | -0.226676 | 0.005801  |
| P  | 3.510610  | 0.675063  | 0.052222  |
| O  | -2.895723 | -0.923327 | -0.142420 |
| H  | 3.633398  | 2.077533  | 0.093481  |
| H  | 4.366604  | 0.385716  | -1.028042 |
| H  | 4.345353  | 0.323699  | 1.130728  |
| H  | -0.646835 | -1.708086 | 0.873832  |
| H  | -0.576751 | -1.798979 | -0.868928 |
| H  | -0.804867 | 1.699141  | -0.240718 |
| H  | -2.954269 | 2.884293  | 0.172291  |
| H  | -3.355850 | 2.052852  | -1.322480 |
| H  | -3.900127 | 1.118219  | 1.544921  |
| H  | -5.122248 | 1.477207  | 0.316035  |

WARNING: Geometry optimization converged in opt job, but not in freq job

Population analysis using the SCF density.

| Label | Frequencies | IR Inten | Raman Activ | Depolar (P) | Depolar (U) | Dipole  |
|-------|-------------|----------|-------------|-------------|-------------|---------|
| A     | 3236.0847   | 10.8005  | 228.0794    | 0.2257      | 0.3682      | 12.4852 |
| A     | 3165.0293   | 11.5820  | 239.3735    | 0.4337      | 0.6051      |         |
| A     | 3122.5390   | 21.5024  | 263.5141    | 0.4194      | 0.5909      |         |
| A     | 3068.2273   | 15.0376  | 284.4552    | 0.7451      | 0.8539      |         |
| A     | 3067.2460   | 12.7633  | 170.8632    | 0.1969      | 0.3290      |         |
| A     | 3043.3324   | 40.6155  | 491.6258    | 0.1359      | 0.2393      |         |

S360

|   |           |          |          |        |        |
|---|-----------|----------|----------|--------|--------|
| A | 3032.0579 | 51.6557  | 497.5003 | 0.0767 | 0.1424 |
| A | 2530.6694 | 9.4289   | 304.5449 | 0.7464 | 0.8548 |
| A | 2529.5158 | 9.1402   | 320.1575 | 0.7494 | 0.8568 |
| A | 2514.2045 | 52.8718  | 931.9311 | 0.0280 | 0.0544 |
| A | 1817.9333 | 727.8820 | 43.3922  | 0.4006 | 0.5720 |
| A | 1758.8714 | 97.2836  | 131.7649 | 0.1126 | 0.2025 |
| A | 1466.0310 | 7.7659   | 41.1474  | 0.5787 | 0.7332 |
| A | 1440.4738 | 22.4976  | 16.0638  | 0.7421 | 0.8520 |
| A | 1432.9392 | 7.4078   | 56.0616  | 0.6585 | 0.7941 |
| A | 1377.8276 | 95.0466  | 3.1394   | 0.6651 | 0.7988 |
| A | 1346.1135 | 10.1731  | 13.1138  | 0.3162 | 0.4805 |
| A | 1312.9323 | 88.0371  | 65.4512  | 0.5781 | 0.7326 |
| A | 1249.5615 | 76.0745  | 35.8702  | 0.1273 | 0.2259 |
| A | 1244.7183 | 120.7172 | 16.7839  | 0.7282 | 0.8428 |
| A | 1185.4909 | 205.5494 | 77.6563  | 0.3403 | 0.5078 |
| A | 1171.7686 | 160.0846 | 7.9343   | 0.7500 | 0.8571 |
| A | 1155.1292 | 16.8105  | 2.9595   | 0.6172 | 0.7633 |
| A | 1123.2524 | 10.2712  | 46.5118  | 0.7288 | 0.8431 |
| A | 1121.7975 | 26.0517  | 57.3814  | 0.5826 | 0.7363 |
| A | 1118.5293 | 94.0147  | 67.2072  | 0.1473 | 0.2569 |
| A | 1065.1277 | 278.3596 | 5.1017   | 0.2025 | 0.3367 |
| A | 1044.7102 | 9.2906   | 11.0656  | 0.3426 | 0.5103 |
| A | 994.6719  | 266.0070 | 57.3495  | 0.7477 | 0.8556 |
| A | 981.5478  | 40.7522  | 3.1688   | 0.3525 | 0.5212 |
| A | 950.5932  | 21.2167  | 9.0801   | 0.3909 | 0.5621 |
| A | 914.4221  | 7.5233   | 3.2352   | 0.4483 | 0.6190 |
| A | 824.4222  | 48.8971  | 8.6306   | 0.6720 | 0.8038 |
| A | 781.3119  | 27.8673  | 18.6545  | 0.0656 | 0.1231 |
| A | 706.9384  | 26.0146  | 12.6638  | 0.0859 | 0.1582 |
| A | 694.3236  | 1.9169   | 4.3619   | 0.3222 | 0.4874 |
| A | 644.1358  | 9.2512   | 11.6518  | 0.2437 | 0.3919 |
| A | 603.7833  | 4.4696   | 4.1089   | 0.1359 | 0.2393 |
| A | 545.4886  | 8.7601   | 6.7671   | 0.7272 | 0.8420 |
| A | 533.4194  | 6.7946   | 4.0651   | 0.7369 | 0.8485 |
| A | 475.4326  | 1.3052   | 1.2014   | 0.7463 | 0.8547 |
| A | 470.3356  | 6.1588   | 8.9585   | 0.3994 | 0.5708 |
| A | 463.7001  | 4.8499   | 5.5131   | 0.3256 | 0.4912 |
| A | 435.8965  | 7.7767   | 3.1497   | 0.3003 | 0.4620 |
| A | 294.7844  | 0.5388   | 11.3835  | 0.0862 | 0.1588 |
| A | 233.4817  | 3.2309   | 2.7708   | 0.7482 | 0.8560 |
| A | 198.6312  | 11.9407  | 5.1429   | 0.4132 | 0.5848 |
| A | 140.5652  | 6.6471   | 0.5901   | 0.7370 | 0.8486 |
| A | 133.2324  | 3.2894   | 0.8090   | 0.6736 | 0.8050 |
| A | 114.2730  | 2.6754   | 0.9276   | 0.6439 | 0.7834 |
| A | 95.8289   | 0.7539   | 1.2923   | 0.7500 | 0.8571 |
| A | 66.2317   | 0.2724   | 0.1848   | 0.7377 | 0.8491 |
| A | 56.7896   | 3.1370   | 0.9608   | 0.7450 | 0.8539 |

A      7.5673    0.1562    0.0552    0.6738    0.8051
